# Supplementary material for: Tracking the popularity and outcomes of all bioRxiv preprints
Source: eLife journal article supplement (doi:10.7554/elife.45133), 2019-04-24
Supplement: supp [file elife-45133-supp-v1.zip]

Archive with 37 entries (37 files):
- elife_poa_e45133_Figure_1_source_data_8.csv
- elife_poa_e45133_Figure_1_source_data_6.csv
- elife_poa_e45133_Figure_2_source_data_3.xlsx
- elife_poa_e45133_Figure_1_source_data_4.docx
- elife_poa_e45133_Figure_6_source_data_1.csv
- elife_poa_e45133_Figure_2_figure_supplement_3_source_data_3.csv
- elife_poa_e45133_Figure_5_source_data_1.csv
- elife_poa_e45133_Figure_3_source_data_1.csv
- elife_poa_e45133_Figure_5_source_data_2.csv
- elife_poa_e45133_Figure_1_source_data_5.docx
- elife_poa_e45133_Supplementary_file_1.pdf
- elife_poa_e45133_Figure_3_source_data_2.csv
- elife_poa_e45133_Transparent_Reporting_File.pdf
- elife_poa_e45133_Figure_2_figure_supplement_3_source_data_2.csv
- elife_poa_e45133_Figure_2_figure_supplement_4_source_data_1.csv
- elife_poa_e45133_Figure_2_figure_supplement_4.pdf
- elife_poa_e45133_Figure_1_source_data_1.csv
- elife_poa_e45133_Figure_2_source_data_2.csv
- elife_poa_e45133_Figure_4_source_data_1.csv
- elife_poa_e45133_Figure_2_source_data_4.csv
- elife_poa_e45133_Figure_3_figure_supplement_3_source_data_1.xlsx
- elife_poa_e45133_Figure_4_source_data_2.docx
- elife_poa_e45133_Figure_2_figure_supplement_3_source_data_1.csv
- elife_poa_e45133_Figure_3_figure_supplement_1.pdf
- elife_poa_e45133_Figure_2_figure_supplement_3.pdf
- elife_poa_e45133_Figure_6_source_data_3.txt
- elife_poa_e45133_Figure_1_source_data_7.docx
- elife_poa_e45133_Source_code_1.md
- elife_poa_e45133_Figure_2_figure_supplement_1_source_data_1.csv
- elife_poa_e45133_Figure_4_source_data_3.xlsx
- elife_poa_e45133_Figure_2_figure_supplement_2.pdf
- elife_poa_e45133_Table_2_source_data_1.csv
- elife_poa_e45133_Figure_1_source_data_3.csv
- elife_poa_e45133_Figure_2_figure_supplement_1.pdf
- elife_poa_e45133_Figure_6_source_data_2.csv
- elife_poa_e45133_Figure_2_source_data_1.csv
- elife_poa_e45133_Figure_1_source_data_2.xlsx
