# Supplementary material for: Tracking the popularity and outcomes of all bioRxiv preprints
Source: eLife journal article supplement (doi:10.7554/elife.45133), 2019-04-24
Supplement: supp [file elife-45133-supp-v1.zip › elife_poa_e45133_Figure_1_source_data_1.csv]

date	collection	submissions	cumulative
2013-11	biochemistry	1	1
2013-11	bioinformatics	6	6
2013-11	biophysics	1	1
2013-11	cancer biology	2	2
2013-11	cell biology	1	1
2013-11	developmental biology	3	3
2013-11	ecology	4	4
2013-11	evolutionary biology	9	9
2013-11	genetics	4	4
2013-11	genomics	9	9
2013-11	immunology	2	2
2013-11	microbiology	1	1
2013-11	molecular biology	2	2
2013-11	neuroscience	3	3
2013-11	plant biology	3	3
2013-11	synthetic biology	4	4
2013-11	systems biology	4	4
2013-11	zoology	1	1
2013-12	bioengineering	1	1
2013-12	bioinformatics	8	14
2013-12	biophysics	3	4
2013-12	cancer biology	2	4
2013-12	cell biology	1	2
2013-12	ecology	5	9
2013-12	evolutionary biology	8	17
2013-12	genetics	5	9
2013-12	genomics	4	13
2013-12	microbiology	2	3
2013-12	neuroscience	6	9
2013-12	plant biology	2	5
2013-12	synthetic biology	1	5
2013-12	zoology	1	2
2014-01	biochemistry	2	3
2014-01	bioinformatics	9	23
2014-01	biophysics	4	8
2014-01	cancer biology	1	5
2014-01	cell biology	4	6
2014-01	developmental biology	2	5
2014-01	ecology	8	17
2014-01	evolutionary biology	6	23
2014-01	genetics	2	11
2014-01	genomics	10	23
2014-01	immunology	2	4
2014-01	microbiology	1	4
2014-01	molecular biology	1	3
2014-01	neuroscience	1	10
2014-01	systems biology	1	5
2014-02	bioinformatics	16	39
2014-02	biophysics	2	10
2014-02	cancer biology	1	6
2014-02	cell biology	3	9
2014-02	developmental biology	2	7
2014-02	ecology	5	22
2014-02	evolutionary biology	14	37
2014-02	genetics	4	15
2014-02	genomics	5	28
2014-02	immunology	2	6
2014-02	microbiology	2	6
2014-02	neuroscience	5	15
2014-02	plant biology	2	7
2014-02	synthetic biology	1	6
2014-02	systems biology	1	6
2014-02	zoology	1	3
2014-03	bioengineering	1	2
2014-03	bioinformatics	7	46
2014-03	biophysics	1	11
2014-03	cell biology	4	13
2014-03	ecology	4	26
2014-03	evolutionary biology	8	45
2014-03	genetics	3	18
2014-03	genomics	4	32
2014-03	microbiology	1	7
2014-03	molecular biology	1	4
2014-03	neuroscience	1	16
2014-03	plant biology	1	8
2014-03	scientific communication and education	1	1
2014-03	synthetic biology	3	9
2014-03	systems biology	3	9
2014-04	biochemistry	2	5
2014-04	bioinformatics	8	54
2014-04	biophysics	1	12
2014-04	cell biology	1	14
2014-04	developmental biology	1	8
2014-04	ecology	3	29
2014-04	evolutionary biology	21	66
2014-04	genetics	2	20
2014-04	genomics	9	41
2014-04	immunology	3	9
2014-04	molecular biology	2	6
2014-04	neuroscience	4	20
2014-04	pathology	1	1
2014-04	physiology	1	1
2014-04	synthetic biology	3	12
2014-04	systems biology	4	13
2014-05	bioinformatics	15	69
2014-05	biophysics	1	13
2014-05	cancer biology	4	10
2014-05	cell biology	1	15
2014-05	developmental biology	2	10
2014-05	ecology	5	34
2014-05	evolutionary biology	10	76
2014-05	genetics	10	30
2014-05	genomics	10	51
2014-05	microbiology	2	9
2014-05	molecular biology	1	7
2014-05	neuroscience	9	29
2014-05	pharmacology and toxicology	2	2
2014-05	physiology	1	2
2014-05	plant biology	1	9
2014-05	systems biology	7	20
2014-06	biochemistry	1	6
2014-06	bioengineering	1	3
2014-06	bioinformatics	14	83
2014-06	biophysics	1	14
2014-06	cell biology	1	16
2014-06	developmental biology	3	13
2014-06	ecology	1	35
2014-06	evolutionary biology	17	93
2014-06	genetics	3	33
2014-06	genomics	15	66
2014-06	immunology	1	10
2014-06	microbiology	1	10
2014-06	molecular biology	1	8
2014-06	neuroscience	6	35
2014-06	paleontology	1	1
2014-06	plant biology	2	11
2014-06	synthetic biology	1	13
2014-06	zoology	2	5
2014-07	animal behavior and cognition	2	2
2014-07	bioinformatics	14	97
2014-07	biophysics	2	16
2014-07	cell biology	2	18
2014-07	ecology	4	39
2014-07	evolutionary biology	11	104
2014-07	genetics	4	37
2014-07	genomics	13	79
2014-07	immunology	2	12
2014-07	microbiology	1	11
2014-07	molecular biology	1	9
2014-07	neuroscience	2	37
2014-07	scientific communication and education	2	3
2014-07	synthetic biology	2	15
2014-07	systems biology	5	25
2014-08	animal behavior and cognition	3	5
2014-08	bioengineering	1	4
2014-08	bioinformatics	15	112
2014-08	biophysics	1	17
2014-08	cancer biology	1	11
2014-08	cell biology	2	20
2014-08	developmental biology	3	16
2014-08	ecology	7	46
2014-08	evolutionary biology	17	121
2014-08	genetics	7	44
2014-08	genomics	11	90
2014-08	microbiology	1	12
2014-08	neuroscience	4	41
2014-08	plant biology	1	12
2014-08	synthetic biology	1	16
2014-08	systems biology	4	29
2014-08	zoology	1	6
2014-09	animal behavior and cognition	1	6
2014-09	bioinformatics	13	125
2014-09	biophysics	4	21
2014-09	cancer biology	2	13
2014-09	developmental biology	2	18
2014-09	ecology	5	51
2014-09	evolutionary biology	16	137
2014-09	genetics	13	57
2014-09	genomics	20	110
2014-09	microbiology	3	15
2014-09	molecular biology	1	10
2014-09	neuroscience	6	47
2014-09	physiology	1	3
2014-09	synthetic biology	3	19
2014-09	systems biology	2	31
2014-09	zoology	1	7
2014-10	animal behavior and cognition	1	7
2014-10	bioinformatics	18	143
2014-10	cancer biology	2	15
2014-10	developmental biology	4	22
2014-10	ecology	6	57
2014-10	evolutionary biology	21	158
2014-10	genetics	8	65
2014-10	genomics	11	121
2014-10	immunology	1	13
2014-10	microbiology	1	16
2014-10	molecular biology	1	11
2014-10	neuroscience	9	56
2014-10	plant biology	1	13
2014-10	scientific communication and education	1	4
2014-10	synthetic biology	1	20
2014-10	systems biology	1	32
2014-10	zoology	1	8
2014-11	animal behavior and cognition	3	10
2014-11	bioinformatics	20	163
2014-11	biophysics	1	22
2014-11	cancer biology	1	16
2014-11	developmental biology	2	24
2014-11	ecology	4	61
2014-11	evolutionary biology	18	176
2014-11	genetics	5	70
2014-11	genomics	7	128
2014-11	immunology	1	14
2014-11	microbiology	1	17
2014-11	molecular biology	3	14
2014-11	neuroscience	5	61
2014-11	physiology	1	4
2014-11	plant biology	2	15
2014-11	systems biology	6	38
2014-11	zoology	1	9
2014-12	bioengineering	2	6
2014-12	bioinformatics	10	173
2014-12	biophysics	3	25
2014-12	cancer biology	2	18
2014-12	developmental biology	2	26
2014-12	ecology	5	66
2014-12	evolutionary biology	15	191
2014-12	genetics	9	79
2014-12	genomics	19	147
2014-12	immunology	1	15
2014-12	microbiology	1	18
2014-12	molecular biology	2	16
2014-12	neuroscience	10	71
2014-12	physiology	3	7
2014-12	plant biology	1	16
2014-12	scientific communication and education	1	5
2014-12	synthetic biology	2	22
2014-12	systems biology	7	45
2015-01	animal behavior and cognition	2	12
2015-01	biochemistry	2	8
2015-01	bioengineering	2	8
2015-01	bioinformatics	20	193
2015-01	biophysics	3	28
2015-01	cancer biology	3	21
2015-01	cell biology	2	22
2015-01	developmental biology	1	27
2015-01	ecology	5	71
2015-01	evolutionary biology	22	213
2015-01	genetics	9	88
2015-01	genomics	13	160
2015-01	immunology	1	16
2015-01	microbiology	2	20
2015-01	molecular biology	4	20
2015-01	neuroscience	13	84
2015-01	physiology	1	8
2015-01	plant biology	2	18
2015-01	synthetic biology	2	24
2015-01	systems biology	5	50
2015-02	biochemistry	1	9
2015-02	bioengineering	2	10
2015-02	bioinformatics	18	211
2015-02	biophysics	2	30
2015-02	cancer biology	1	22
2015-02	developmental biology	1	28
2015-02	ecology	4	75
2015-02	evolutionary biology	15	228
2015-02	genetics	11	99
2015-02	genomics	13	173
2015-02	immunology	2	18
2015-02	neuroscience	8	92
2015-02	paleontology	1	2
2015-02	plant biology	4	22
2015-02	synthetic biology	1	25
2015-02	systems biology	4	54
2015-03	biochemistry	1	10
2015-03	bioinformatics	18	229
2015-03	biophysics	3	33
2015-03	cancer biology	4	26
2015-03	cell biology	1	23
2015-03	developmental biology	8	36
2015-03	ecology	4	79
2015-03	evolutionary biology	24	252
2015-03	genetics	15	114
2015-03	genomics	14	187
2015-03	immunology	1	19
2015-03	microbiology	4	24
2015-03	molecular biology	3	23
2015-03	neuroscience	11	103
2015-03	paleontology	1	3
2015-03	plant biology	3	25
2015-03	synthetic biology	2	27
2015-03	systems biology	3	57
2015-04	animal behavior and cognition	3	15
2015-04	biochemistry	1	11
2015-04	bioengineering	3	13
2015-04	bioinformatics	24	253
2015-04	biophysics	2	35
2015-04	cancer biology	2	28
2015-04	developmental biology	1	37
2015-04	ecology	7	86
2015-04	evolutionary biology	23	275
2015-04	genetics	11	125
2015-04	genomics	18	205
2015-04	microbiology	3	27
2015-04	molecular biology	1	24
2015-04	neuroscience	9	112
2015-04	pathology	2	3
2015-04	pharmacology and toxicology	1	3
2015-04	plant biology	1	26
2015-04	scientific communication and education	1	6
2015-04	synthetic biology	3	30
2015-04	systems biology	2	59
2015-04	zoology	1	10
2015-05	biochemistry	1	12
2015-05	bioengineering	2	15
2015-05	bioinformatics	20	273
2015-05	biophysics	4	39
2015-05	cancer biology	3	31
2015-05	cell biology	1	24
2015-05	ecology	8	94
2015-05	evolutionary biology	22	297
2015-05	genetics	10	135
2015-05	genomics	16	221
2015-05	immunology	1	20
2015-05	microbiology	6	33
2015-05	neuroscience	5	117
2015-05	plant biology	4	30
2015-05	synthetic biology	4	34
2015-05	systems biology	4	63
2015-05	zoology	1	11
2015-06	animal behavior and cognition	2	17
2015-06	biochemistry	1	13
2015-06	bioengineering	1	16
2015-06	bioinformatics	33	306
2015-06	biophysics	4	43
2015-06	cancer biology	4	35
2015-06	cell biology	3	27
2015-06	ecology	5	99
2015-06	evolutionary biology	18	315
2015-06	genetics	13	148
2015-06	genomics	17	238
2015-06	immunology	1	21
2015-06	microbiology	4	37
2015-06	molecular biology	2	26
2015-06	neuroscience	9	126
2015-06	pathology	1	4
2015-06	pharmacology and toxicology	2	5
2015-06	scientific communication and education	1	7
2015-06	synthetic biology	3	37
2015-06	systems biology	4	67
2015-07	biochemistry	2	15
2015-07	bioengineering	7	23
2015-07	bioinformatics	26	332
2015-07	biophysics	1	44
2015-07	cancer biology	3	38
2015-07	cell biology	1	28
2015-07	developmental biology	5	42
2015-07	ecology	6	105
2015-07	evolutionary biology	43	358
2015-07	genetics	17	165
2015-07	genomics	18	256
2015-07	immunology	1	22
2015-07	microbiology	6	43
2015-07	neuroscience	11	137
2015-07	plant biology	3	33
2015-07	scientific communication and education	2	9
2015-07	synthetic biology	1	38
2015-07	systems biology	5	72
2015-07	zoology	1	12
2015-08	animal behavior and cognition	2	19
2015-08	biochemistry	2	17
2015-08	bioengineering	4	27
2015-08	bioinformatics	24	356
2015-08	biophysics	3	47
2015-08	cancer biology	6	44
2015-08	cell biology	3	31
2015-08	developmental biology	2	44
2015-08	ecology	10	115
2015-08	evolutionary biology	25	383
2015-08	genetics	20	185
2015-08	genomics	26	282
2015-08	immunology	1	23
2015-08	microbiology	3	46
2015-08	molecular biology	3	29
2015-08	neuroscience	10	147
2015-08	plant biology	3	36
2015-08	scientific communication and education	1	10
2015-08	synthetic biology	4	42
2015-08	systems biology	6	78
2015-08	zoology	1	13
2015-09	animal behavior and cognition	3	22
2015-09	biochemistry	2	19
2015-09	bioengineering	1	28
2015-09	bioinformatics	25	381
2015-09	biophysics	3	50
2015-09	cancer biology	4	48
2015-09	cell biology	1	32
2015-09	developmental biology	2	46
2015-09	ecology	12	127
2015-09	evolutionary biology	39	422
2015-09	genetics	12	197
2015-09	genomics	24	306
2015-09	immunology	2	25
2015-09	microbiology	4	50
2015-09	molecular biology	2	31
2015-09	neuroscience	15	162
2015-09	paleontology	1	4
2015-09	physiology	2	10
2015-09	synthetic biology	2	44
2015-09	systems biology	5	83
2015-09	zoology	1	14
2015-10	animal behavior and cognition	3	25
2015-10	bioengineering	1	29
2015-10	bioinformatics	32	413
2015-10	biophysics	4	54
2015-10	cancer biology	6	54
2015-10	cell biology	4	36
2015-10	clinical trials	1	1
2015-10	developmental biology	1	47
2015-10	ecology	10	137
2015-10	evolutionary biology	31	453
2015-10	genetics	23	220
2015-10	genomics	21	327
2015-10	immunology	1	26
2015-10	microbiology	7	57
2015-10	molecular biology	2	33
2015-10	neuroscience	21	183
2015-10	pathology	1	5
2015-10	pharmacology and toxicology	2	7
2015-10	physiology	2	12
2015-10	plant biology	2	38
2015-10	scientific communication and education	1	11
2015-10	synthetic biology	2	46
2015-10	systems biology	11	94
2015-10	zoology	2	16
2015-11	animal behavior and cognition	2	27
2015-11	biochemistry	4	23
2015-11	bioinformatics	39	452
2015-11	biophysics	6	60
2015-11	cancer biology	5	59
2015-11	cell biology	2	38
2015-11	developmental biology	9	56
2015-11	ecology	10	147
2015-11	evolutionary biology	34	487
2015-11	genetics	29	249
2015-11	genomics	31	358
2015-11	immunology	2	28
2015-11	microbiology	12	69
2015-11	molecular biology	2	35
2015-11	neuroscience	16	199
2015-11	pathology	1	6
2015-11	physiology	3	15
2015-11	plant biology	7	45
2015-11	scientific communication and education	1	12
2015-11	synthetic biology	1	47
2015-11	systems biology	9	103
2015-11	zoology	2	18
2015-12	animal behavior and cognition	3	30
2015-12	biochemistry	4	27
2015-12	bioinformatics	34	486
2015-12	biophysics	2	62
2015-12	cancer biology	6	65
2015-12	cell biology	2	40
2015-12	developmental biology	1	57
2015-12	ecology	13	160
2015-12	evolutionary biology	29	516
2015-12	genetics	20	269
2015-12	genomics	29	387
2015-12	immunology	1	29
2015-12	microbiology	7	76
2015-12	molecular biology	1	36
2015-12	neuroscience	18	217
2015-12	physiology	1	16
2015-12	plant biology	5	50
2015-12	scientific communication and education	1	13
2015-12	systems biology	14	117
2015-12	zoology	3	21
2016-01	animal behavior and cognition	4	34
2016-01	biochemistry	1	28
2016-01	bioengineering	5	34
2016-01	bioinformatics	38	524
2016-01	biophysics	8	70
2016-01	cancer biology	6	71
2016-01	cell biology	4	44
2016-01	developmental biology	3	60
2016-01	ecology	4	164
2016-01	evolutionary biology	25	541
2016-01	genetics	17	286
2016-01	genomics	27	414
2016-01	immunology	1	30
2016-01	microbiology	4	80
2016-01	molecular biology	2	38
2016-01	neuroscience	24	241
2016-01	pathology	2	8
2016-01	physiology	1	17
2016-01	plant biology	8	58
2016-01	scientific communication and education	1	14
2016-01	synthetic biology	2	49
2016-01	systems biology	13	130
2016-01	zoology	2	23
2016-02	animal behavior and cognition	4	38
2016-02	biochemistry	6	34
2016-02	bioinformatics	40	564
2016-02	biophysics	6	76
2016-02	cancer biology	5	76
2016-02	cell biology	10	54
2016-02	developmental biology	6	66
2016-02	ecology	22	186
2016-02	evolutionary biology	36	577
2016-02	genetics	26	312
2016-02	genomics	39	453
2016-02	immunology	3	33
2016-02	microbiology	15	95
2016-02	molecular biology	3	41
2016-02	neuroscience	26	267
2016-02	pharmacology and toxicology	1	8
2016-02	plant biology	8	66
2016-02	scientific communication and education	2	16
2016-02	systems biology	13	143
2016-03	animal behavior and cognition	2	40
2016-03	biochemistry	6	40
2016-03	bioengineering	7	41
2016-03	bioinformatics	53	617
2016-03	biophysics	9	85
2016-03	cancer biology	8	84
2016-03	cell biology	18	72
2016-03	developmental biology	6	72
2016-03	ecology	23	209
2016-03	evolutionary biology	52	629
2016-03	genetics	38	350
2016-03	genomics	37	490
2016-03	immunology	6	39
2016-03	microbiology	13	108
2016-03	molecular biology	5	46
2016-03	neuroscience	42	309
2016-03	paleontology	2	6
2016-03	pathology	1	9
2016-03	pharmacology and toxicology	3	11
2016-03	physiology	5	22
2016-03	plant biology	11	77
2016-03	scientific communication and education	3	19
2016-03	synthetic biology	3	52
2016-03	systems biology	12	155
2016-03	zoology	1	24
2016-04	animal behavior and cognition	6	46
2016-04	biochemistry	7	47
2016-04	bioengineering	5	46
2016-04	bioinformatics	55	672
2016-04	biophysics	10	95
2016-04	cancer biology	11	95
2016-04	cell biology	10	82
2016-04	developmental biology	7	79
2016-04	ecology	11	220
2016-04	epidemiology	3	3
2016-04	evolutionary biology	40	669
2016-04	genetics	24	374
2016-04	genomics	43	533
2016-04	immunology	3	42
2016-04	microbiology	29	137
2016-04	molecular biology	8	54
2016-04	neuroscience	39	348
2016-04	pathology	2	11
2016-04	pharmacology and toxicology	1	12
2016-04	physiology	2	24
2016-04	plant biology	8	85
2016-04	scientific communication and education	3	22
2016-04	synthetic biology	1	53
2016-04	systems biology	14	169
2016-04	zoology	3	27
2016-05	animal behavior and cognition	9	55
2016-05	biochemistry	8	55
2016-05	bioengineering	1	47
2016-05	bioinformatics	62	734
2016-05	biophysics	13	108
2016-05	cancer biology	9	104
2016-05	cell biology	9	91
2016-05	developmental biology	13	92
2016-05	ecology	20	240
2016-05	epidemiology	8	11
2016-05	evolutionary biology	45	714
2016-05	genetics	31	405
2016-05	genomics	40	573
2016-05	immunology	3	45
2016-05	microbiology	23	160
2016-05	molecular biology	7	61
2016-05	neuroscience	51	399
2016-05	pathology	1	12
2016-05	physiology	2	26
2016-05	plant biology	7	92
2016-05	scientific communication and education	6	28
2016-05	synthetic biology	4	57
2016-05	systems biology	15	184
2016-05	zoology	1	28
2016-06	animal behavior and cognition	10	65
2016-06	biochemistry	2	57
2016-06	bioengineering	4	51
2016-06	bioinformatics	59	793
2016-06	biophysics	14	122
2016-06	cancer biology	11	115
2016-06	cell biology	17	108
2016-06	developmental biology	6	98
2016-06	ecology	20	260
2016-06	epidemiology	7	18
2016-06	evolutionary biology	39	753
2016-06	genetics	24	429
2016-06	genomics	43	616
2016-06	immunology	6	51
2016-06	microbiology	21	181
2016-06	molecular biology	7	68
2016-06	neuroscience	69	468
2016-06	pathology	3	15
2016-06	pharmacology and toxicology	2	14
2016-06	physiology	2	28
2016-06	plant biology	8	100
2016-06	scientific communication and education	4	32
2016-06	synthetic biology	6	63
2016-06	systems biology	16	200
2016-07	animal behavior and cognition	7	72
2016-07	biochemistry	11	68
2016-07	bioengineering	2	53
2016-07	bioinformatics	52	845
2016-07	biophysics	17	139
2016-07	cancer biology	6	121
2016-07	cell biology	8	116
2016-07	developmental biology	5	103
2016-07	ecology	21	281
2016-07	epidemiology	11	29
2016-07	evolutionary biology	43	796
2016-07	genetics	35	464
2016-07	genomics	45	661
2016-07	immunology	11	62
2016-07	microbiology	21	202
2016-07	molecular biology	5	73
2016-07	neuroscience	61	529
2016-07	pathology	1	16
2016-07	pharmacology and toxicology	1	15
2016-07	plant biology	7	107
2016-07	scientific communication and education	1	33
2016-07	synthetic biology	1	64
2016-07	systems biology	10	210
2016-07	zoology	2	30
2016-08	animal behavior and cognition	9	81
2016-08	biochemistry	12	80
2016-08	bioengineering	2	55
2016-08	bioinformatics	66	911
2016-08	biophysics	21	160
2016-08	cancer biology	1	122
2016-08	cell biology	15	131
2016-08	developmental biology	9	112
2016-08	ecology	25	306
2016-08	epidemiology	9	38
2016-08	evolutionary biology	56	852
2016-08	genetics	34	498
2016-08	genomics	43	704
2016-08	immunology	3	65
2016-08	microbiology	26	228
2016-08	molecular biology	16	89
2016-08	neuroscience	54	583
2016-08	pathology	1	17
2016-08	pharmacology and toxicology	1	16
2016-08	physiology	2	30
2016-08	plant biology	11	118
2016-08	scientific communication and education	3	36
2016-08	synthetic biology	5	69
2016-08	systems biology	22	232
2016-08	zoology	2	32
2016-09	animal behavior and cognition	3	84
2016-09	biochemistry	8	88
2016-09	bioengineering	2	57
2016-09	bioinformatics	68	979
2016-09	biophysics	19	179
2016-09	cancer biology	3	125
2016-09	cell biology	23	154
2016-09	developmental biology	4	116
2016-09	ecology	24	330
2016-09	epidemiology	11	49
2016-09	evolutionary biology	32	884
2016-09	genetics	32	530
2016-09	genomics	56	760
2016-09	immunology	3	68
2016-09	microbiology	23	251
2016-09	molecular biology	11	100
2016-09	neuroscience	74	657
2016-09	paleontology	1	7
2016-09	pharmacology and toxicology	3	19
2016-09	physiology	3	33
2016-09	plant biology	9	127
2016-09	scientific communication and education	1	37
2016-09	synthetic biology	6	75
2016-09	systems biology	15	247
2016-09	zoology	2	34
2016-10	animal behavior and cognition	8	92
2016-10	biochemistry	10	98
2016-10	bioengineering	5	62
2016-10	bioinformatics	69	1048
2016-10	biophysics	20	199
2016-10	cancer biology	11	136
2016-10	cell biology	8	162
2016-10	developmental biology	7	123
2016-10	ecology	22	352
2016-10	epidemiology	14	63
2016-10	evolutionary biology	48	932
2016-10	genetics	33	563
2016-10	genomics	36	796
2016-10	immunology	1	69
2016-10	microbiology	26	277
2016-10	molecular biology	6	106
2016-10	neuroscience	93	750
2016-10	paleontology	1	8
2016-10	pathology	1	18
2016-10	physiology	4	37
2016-10	plant biology	9	136
2016-10	scientific communication and education	2	39
2016-10	synthetic biology	5	80
2016-10	systems biology	15	262
2016-10	zoology	1	35
2016-11	animal behavior and cognition	5	97
2016-11	biochemistry	13	111
2016-11	bioengineering	1	63
2016-11	bioinformatics	70	1118
2016-11	biophysics	23	222
2016-11	cancer biology	13	149
2016-11	cell biology	14	176
2016-11	clinical trials	1	2
2016-11	developmental biology	7	130
2016-11	ecology	19	371
2016-11	epidemiology	9	72
2016-11	evolutionary biology	45	977
2016-11	genetics	31	594
2016-11	genomics	38	834
2016-11	immunology	7	76
2016-11	microbiology	26	303
2016-11	molecular biology	8	114
2016-11	neuroscience	82	832
2016-11	pharmacology and toxicology	5	24
2016-11	physiology	1	38
2016-11	plant biology	12	148
2016-11	scientific communication and education	6	45
2016-11	synthetic biology	11	91
2016-11	systems biology	15	277
2016-11	zoology	1	36
2016-12	animal behavior and cognition	6	103
2016-12	biochemistry	14	125
2016-12	bioengineering	2	65
2016-12	bioinformatics	76	1194
2016-12	biophysics	24	246
2016-12	cancer biology	14	163
2016-12	cell biology	26	202
2016-12	clinical trials	1	3
2016-12	developmental biology	16	146
2016-12	ecology	20	391
2016-12	epidemiology	6	78
2016-12	evolutionary biology	65	1042
2016-12	genetics	38	632
2016-12	genomics	62	896
2016-12	immunology	4	80
2016-12	microbiology	37	340
2016-12	molecular biology	13	127
2016-12	neuroscience	91	923
2016-12	pathology	1	19
2016-12	pharmacology and toxicology	4	28
2016-12	physiology	3	41
2016-12	plant biology	8	156
2016-12	scientific communication and education	3	48
2016-12	synthetic biology	7	98
2016-12	systems biology	13	290
2016-12	zoology	3	39
2017-01	animal behavior and cognition	13	116
2017-01	biochemistry	12	137
2017-01	bioengineering	8	73
2017-01	bioinformatics	78	1272
2017-01	biophysics	24	270
2017-01	cancer biology	11	174
2017-01	cell biology	18	220
2017-01	clinical trials	1	4
2017-01	developmental biology	19	165
2017-01	ecology	24	415
2017-01	epidemiology	16	94
2017-01	evolutionary biology	43	1085
2017-01	genetics	42	674
2017-01	genomics	60	956
2017-01	immunology	4	84
2017-01	microbiology	40	380
2017-01	molecular biology	16	143
2017-01	neuroscience	103	1026
2017-01	pharmacology and toxicology	4	32
2017-01	physiology	2	43
2017-01	plant biology	17	173
2017-01	scientific communication and education	4	52
2017-01	synthetic biology	3	101
2017-01	systems biology	20	310
2017-01	zoology	4	43
2017-02	animal behavior and cognition	12	128
2017-02	biochemistry	8	145
2017-02	bioengineering	8	81
2017-02	bioinformatics	63	1335
2017-02	biophysics	18	288
2017-02	cancer biology	12	186
2017-02	cell biology	25	245
2017-02	clinical trials	1	5
2017-02	developmental biology	23	188
2017-02	ecology	32	447
2017-02	epidemiology	17	111
2017-02	evolutionary biology	48	1133
2017-02	genetics	52	726
2017-02	genomics	62	1018
2017-02	immunology	12	96
2017-02	microbiology	42	422
2017-02	molecular biology	16	159
2017-02	neuroscience	102	1128
2017-02	paleontology	1	9
2017-02	pathology	2	21
2017-02	pharmacology and toxicology	5	37
2017-02	physiology	3	46
2017-02	plant biology	14	187
2017-02	scientific communication and education	11	63
2017-02	synthetic biology	11	112
2017-02	systems biology	21	331
2017-02	zoology	2	45
2017-03	animal behavior and cognition	10	138
2017-03	biochemistry	24	169
2017-03	bioengineering	8	89
2017-03	bioinformatics	110	1445
2017-03	biophysics	27	315
2017-03	cancer biology	17	203
2017-03	cell biology	33	278
2017-03	clinical trials	1	6
2017-03	developmental biology	19	207
2017-03	ecology	30	477
2017-03	epidemiology	25	136
2017-03	evolutionary biology	97	1230
2017-03	genetics	57	783
2017-03	genomics	65	1083
2017-03	immunology	10	106
2017-03	microbiology	55	477
2017-03	molecular biology	17	176
2017-03	neuroscience	114	1242
2017-03	paleontology	1	10
2017-03	pathology	2	23
2017-03	pharmacology and toxicology	6	43
2017-03	physiology	6	52
2017-03	plant biology	31	218
2017-03	scientific communication and education	5	68
2017-03	synthetic biology	11	123
2017-03	systems biology	28	359
2017-03	zoology	3	48
2017-04	animal behavior and cognition	8	146
2017-04	biochemistry	29	198
2017-04	bioengineering	10	99
2017-04	bioinformatics	92	1537
2017-04	biophysics	27	342
2017-04	cancer biology	24	227
2017-04	cell biology	34	312
2017-04	clinical trials	2	8
2017-04	developmental biology	25	232
2017-04	ecology	26	503
2017-04	epidemiology	28	164
2017-04	evolutionary biology	44	1274
2017-04	genetics	48	831
2017-04	genomics	61	1144
2017-04	immunology	9	115
2017-04	microbiology	43	520
2017-04	molecular biology	21	197
2017-04	neuroscience	130	1372
2017-04	paleontology	1	11
2017-04	pathology	2	25
2017-04	pharmacology and toxicology	10	53
2017-04	physiology	7	59
2017-04	plant biology	19	237
2017-04	scientific communication and education	5	73
2017-04	synthetic biology	5	128
2017-04	systems biology	28	387
2017-04	zoology	3	51
2017-05	animal behavior and cognition	12	158
2017-05	biochemistry	22	220
2017-05	bioengineering	11	110
2017-05	bioinformatics	103	1640
2017-05	biophysics	44	386
2017-05	cancer biology	21	248
2017-05	cell biology	46	358
2017-05	clinical trials	1	9
2017-05	developmental biology	32	264
2017-05	ecology	27	530
2017-05	epidemiology	32	196
2017-05	evolutionary biology	74	1348
2017-05	genetics	62	893
2017-05	genomics	72	1216
2017-05	immunology	10	125
2017-05	microbiology	72	592
2017-05	molecular biology	24	221
2017-05	neuroscience	182	1554
2017-05	pathology	4	29
2017-05	pharmacology and toxicology	6	59
2017-05	physiology	6	65
2017-05	plant biology	30	267
2017-05	scientific communication and education	14	87
2017-05	synthetic biology	11	139
2017-05	systems biology	36	423
2017-05	zoology	4	55
2017-06	animal behavior and cognition	19	177
2017-06	biochemistry	45	265
2017-06	bioengineering	22	132
2017-06	bioinformatics	111	1751
2017-06	biophysics	45	431
2017-06	cancer biology	43	291
2017-06	cell biology	66	424
2017-06	clinical trials	2	11
2017-06	developmental biology	30	294
2017-06	ecology	38	568
2017-06	epidemiology	26	222
2017-06	evolutionary biology	82	1430
2017-06	genetics	72	965
2017-06	genomics	77	1293
2017-06	immunology	16	141
2017-06	microbiology	63	655
2017-06	molecular biology	23	244
2017-06	neuroscience	204	1758
2017-06	paleontology	1	12
2017-06	pathology	5	34
2017-06	pharmacology and toxicology	6	65
2017-06	physiology	19	84
2017-06	plant biology	27	294
2017-06	scientific communication and education	4	91
2017-06	synthetic biology	13	152
2017-06	systems biology	37	460
2017-06	zoology	1	56
2017-07	animal behavior and cognition	16	193
2017-07	biochemistry	33	298
2017-07	bioengineering	22	154
2017-07	bioinformatics	113	1864
2017-07	biophysics	37	468
2017-07	cancer biology	26	317
2017-07	cell biology	44	468
2017-07	developmental biology	22	316
2017-07	ecology	49	617
2017-07	epidemiology	20	242
2017-07	evolutionary biology	81	1511
2017-07	genetics	61	1026
2017-07	genomics	78	1371
2017-07	immunology	15	156
2017-07	microbiology	57	712
2017-07	molecular biology	30	274
2017-07	neuroscience	173	1931
2017-07	paleontology	1	13
2017-07	pathology	4	38
2017-07	pharmacology and toxicology	12	77
2017-07	physiology	8	92
2017-07	plant biology	27	321
2017-07	scientific communication and education	4	95
2017-07	synthetic biology	13	165
2017-07	systems biology	27	487
2017-07	zoology	3	59
2017-08	animal behavior and cognition	16	209
2017-08	biochemistry	33	331
2017-08	bioengineering	12	166
2017-08	bioinformatics	122	1986
2017-08	biophysics	39	507
2017-08	cancer biology	35	352
2017-08	cell biology	49	517
2017-08	clinical trials	1	12
2017-08	developmental biology	36	352
2017-08	ecology	32	649
2017-08	epidemiology	24	266
2017-08	evolutionary biology	62	1573
2017-08	genetics	57	1083
2017-08	genomics	74	1445
2017-08	immunology	13	169
2017-08	microbiology	81	793
2017-08	molecular biology	33	307
2017-08	neuroscience	179	2110
2017-08	paleontology	1	14
2017-08	pathology	1	39
2017-08	pharmacology and toxicology	4	81
2017-08	physiology	9	101
2017-08	plant biology	27	348
2017-08	scientific communication and education	5	100
2017-08	synthetic biology	10	175
2017-08	systems biology	27	514
2017-08	zoology	6	65
2017-09	animal behavior and cognition	19	228
2017-09	biochemistry	23	354
2017-09	bioengineering	18	184
2017-09	bioinformatics	112	2098
2017-09	biophysics	43	550
2017-09	cancer biology	41	393
2017-09	cell biology	49	566
2017-09	developmental biology	22	374
2017-09	ecology	51	700
2017-09	epidemiology	35	301
2017-09	evolutionary biology	61	1634
2017-09	genetics	81	1164
2017-09	genomics	76	1521
2017-09	immunology	20	189
2017-09	microbiology	58	851
2017-09	molecular biology	30	337
2017-09	neuroscience	212	2322
2017-09	paleontology	1	15
2017-09	pathology	5	44
2017-09	pharmacology and toxicology	15	96
2017-09	physiology	17	118
2017-09	plant biology	23	371
2017-09	scientific communication and education	3	103
2017-09	synthetic biology	11	186
2017-09	systems biology	30	544
2017-09	zoology	3	68
2017-10	animal behavior and cognition	26	254
2017-10	biochemistry	33	387
2017-10	bioengineering	16	200
2017-10	bioinformatics	124	2222
2017-10	biophysics	66	616
2017-10	cancer biology	43	436
2017-10	cell biology	63	629
2017-10	clinical trials	1	13
2017-10	developmental biology	39	413
2017-10	ecology	36	736
2017-10	epidemiology	37	338
2017-10	evolutionary biology	81	1715
2017-10	genetics	83	1247
2017-10	genomics	84	1605
2017-10	immunology	22	211
2017-10	microbiology	71	922
2017-10	molecular biology	24	361
2017-10	neuroscience	246	2568
2017-10	paleontology	2	17
2017-10	pathology	2	46
2017-10	pharmacology and toxicology	7	103
2017-10	physiology	9	127
2017-10	plant biology	36	407
2017-10	scientific communication and education	2	105
2017-10	synthetic biology	9	195
2017-10	systems biology	33	577
2017-10	zoology	10	78
2017-11	animal behavior and cognition	13	267
2017-11	biochemistry	30	417
2017-11	bioengineering	15	215
2017-11	bioinformatics	151	2373
2017-11	biophysics	36	652
2017-11	cancer biology	43	479
2017-11	cell biology	58	687
2017-11	clinical trials	6	19
2017-11	developmental biology	30	443
2017-11	ecology	51	787
2017-11	epidemiology	32	370
2017-11	evolutionary biology	81	1796
2017-11	genetics	78	1325
2017-11	genomics	80	1685
2017-11	immunology	31	242
2017-11	microbiology	78	1000
2017-11	molecular biology	36	397
2017-11	neuroscience	241	2809
2017-11	paleontology	3	20
2017-11	pathology	5	51
2017-11	pharmacology and toxicology	3	106
2017-11	physiology	10	137
2017-11	plant biology	26	433
2017-11	scientific communication and education	6	111
2017-11	synthetic biology	19	214
2017-11	systems biology	30	607
2017-11	zoology	4	82
2017-12	animal behavior and cognition	16	283
2017-12	biochemistry	24	441
2017-12	bioengineering	18	233
2017-12	bioinformatics	112	2485
2017-12	biophysics	56	708
2017-12	cancer biology	36	515
2017-12	cell biology	52	739
2017-12	clinical trials	3	22
2017-12	developmental biology	34	477
2017-12	ecology	40	827
2017-12	epidemiology	30	400
2017-12	evolutionary biology	84	1880
2017-12	genetics	63	1388
2017-12	genomics	80	1765
2017-12	immunology	17	259
2017-12	microbiology	68	1068
2017-12	molecular biology	21	418
2017-12	neuroscience	228	3037
2017-12	paleontology	3	23
2017-12	pathology	1	52
2017-12	pharmacology and toxicology	5	111
2017-12	physiology	12	149
2017-12	plant biology	36	469
2017-12	scientific communication and education	5	116
2017-12	synthetic biology	7	221
2017-12	systems biology	42	649
2017-12	zoology	6	88
2018-01	animal behavior and cognition	16	299
2018-01	biochemistry	52	493
2018-01	bioengineering	21	254
2018-01	bioinformatics	129	2614
2018-01	biophysics	43	751
2018-01	cancer biology	46	561
2018-01	cell biology	60	799
2018-01	clinical trials	2	24
2018-01	developmental biology	38	515
2018-01	ecology	32	859
2018-01	epidemiology	26	426
2018-01	evolutionary biology	89	1969
2018-01	genetics	61	1449
2018-01	genomics	84	1849
2018-01	immunology	25	284
2018-01	microbiology	81	1149
2018-01	molecular biology	37	455
2018-01	neuroscience	256	3293
2018-01	paleontology	1	24
2018-01	pathology	5	57
2018-01	pharmacology and toxicology	4	115
2018-01	physiology	15	164
2018-01	plant biology	50	519
2018-01	scientific communication and education	8	124
2018-01	synthetic biology	11	232
2018-01	systems biology	50	699
2018-01	zoology	5	93
2018-02	animal behavior and cognition	29	328
2018-02	biochemistry	30	523
2018-02	bioengineering	34	288
2018-02	bioinformatics	131	2745
2018-02	biophysics	52	803
2018-02	cancer biology	38	599
2018-02	cell biology	68	867
2018-02	clinical trials	3	27
2018-02	developmental biology	47	562
2018-02	ecology	49	908
2018-02	epidemiology	32	458
2018-02	evolutionary biology	63	2032
2018-02	genetics	67	1516
2018-02	genomics	82	1931
2018-02	immunology	26	310
2018-02	microbiology	79	1228
2018-02	molecular biology	42	497
2018-02	neuroscience	217	3510
2018-02	paleontology	1	25
2018-02	pathology	13	70
2018-02	pharmacology and toxicology	7	122
2018-02	physiology	9	173
2018-02	plant biology	40	559
2018-02	scientific communication and education	9	133
2018-02	synthetic biology	7	239
2018-02	systems biology	48	747
2018-02	zoology	5	98
2018-03	animal behavior and cognition	21	349
2018-03	biochemistry	37	560
2018-03	bioengineering	35	323
2018-03	bioinformatics	146	2891
2018-03	biophysics	100	903
2018-03	cancer biology	46	645
2018-03	cell biology	79	946
2018-03	clinical trials	2	29
2018-03	developmental biology	36	598
2018-03	ecology	58	966
2018-03	epidemiology	38	496
2018-03	evolutionary biology	86	2118
2018-03	genetics	84	1600
2018-03	genomics	97	2028
2018-03	immunology	35	345
2018-03	microbiology	94	1322
2018-03	molecular biology	51	548
2018-03	neuroscience	298	3808
2018-03	pathology	6	76
2018-03	pharmacology and toxicology	9	131
2018-03	physiology	13	186
2018-03	plant biology	32	591
2018-03	scientific communication and education	6	139
2018-03	synthetic biology	17	256
2018-03	systems biology	50	797
2018-03	zoology	6	104
2018-04	animal behavior and cognition	15	364
2018-04	biochemistry	53	613
2018-04	bioengineering	21	344
2018-04	bioinformatics	157	3048
2018-04	biophysics	88	991
2018-04	cancer biology	48	693
2018-04	cell biology	71	1017
2018-04	clinical trials	6	35
2018-04	developmental biology	53	651
2018-04	ecology	45	1011
2018-04	epidemiology	36	532
2018-04	evolutionary biology	74	2192
2018-04	genetics	79	1679
2018-04	genomics	99	2127
2018-04	immunology	53	398
2018-04	microbiology	162	1484
2018-04	molecular biology	44	592
2018-04	neuroscience	261	4069
2018-04	paleontology	1	26
2018-04	pathology	9	85
2018-04	pharmacology and toxicology	10	141
2018-04	physiology	7	193
2018-04	plant biology	32	623
2018-04	scientific communication and education	7	146
2018-04	synthetic biology	14	270
2018-04	systems biology	43	840
2018-04	zoology	7	111
2018-05	animal behavior and cognition	31	395
2018-05	biochemistry	59	672
2018-05	bioengineering	42	386
2018-05	bioinformatics	178	3226
2018-05	biophysics	82	1073
2018-05	cancer biology	68	761
2018-05	cell biology	93	1110
2018-05	clinical trials	6	41
2018-05	developmental biology	66	717
2018-05	ecology	86	1097
2018-05	epidemiology	50	582
2018-05	evolutionary biology	100	2292
2018-05	genetics	86	1765
2018-05	genomics	103	2230
2018-05	immunology	61	459
2018-05	microbiology	259	1743
2018-05	molecular biology	70	662
2018-05	neuroscience	303	4372
2018-05	paleontology	4	30
2018-05	pathology	6	91
2018-05	pharmacology and toxicology	20	161
2018-05	physiology	27	220
2018-05	plant biology	43	666
2018-05	scientific communication and education	7	153
2018-05	synthetic biology	17	287
2018-05	systems biology	59	899
2018-05	zoology	6	117
2018-06	animal behavior and cognition	46	441
2018-06	biochemistry	50	722
2018-06	bioengineering	26	412
2018-06	bioinformatics	169	3395
2018-06	biophysics	72	1145
2018-06	cancer biology	71	832
2018-06	cell biology	85	1195
2018-06	clinical trials	3	44
2018-06	developmental biology	63	780
2018-06	ecology	84	1181
2018-06	epidemiology	55	637
2018-06	evolutionary biology	104	2396
2018-06	genetics	81	1846
2018-06	genomics	113	2343
2018-06	immunology	54	513
2018-06	microbiology	210	1953
2018-06	molecular biology	62	724
2018-06	neuroscience	326	4698
2018-06	paleontology	4	34
2018-06	pathology	14	105
2018-06	pharmacology and toxicology	15	176
2018-06	physiology	18	238
2018-06	plant biology	40	706
2018-06	scientific communication and education	17	170
2018-06	synthetic biology	23	310
2018-06	systems biology	54	953
2018-06	zoology	8	125
2018-07	animal behavior and cognition	32	473
2018-07	biochemistry	43	765
2018-07	bioengineering	42	454
2018-07	bioinformatics	152	3547
2018-07	biophysics	90	1235
2018-07	cancer biology	67	899
2018-07	cell biology	90	1285
2018-07	clinical trials	2	46
2018-07	developmental biology	61	841
2018-07	ecology	72	1253
2018-07	epidemiology	43	680
2018-07	evolutionary biology	97	2493
2018-07	genetics	107	1953
2018-07	genomics	115	2458
2018-07	immunology	40	553
2018-07	microbiology	141	2094
2018-07	molecular biology	55	779
2018-07	neuroscience	292	4990
2018-07	paleontology	1	35
2018-07	pathology	6	111
2018-07	pharmacology and toxicology	14	190
2018-07	physiology	21	259
2018-07	plant biology	63	769
2018-07	scientific communication and education	16	186
2018-07	synthetic biology	16	326
2018-07	systems biology	42	995
2018-07	zoology	7	132
2018-08	animal behavior and cognition	34	507
2018-08	biochemistry	54	819
2018-08	bioengineering	44	498
2018-08	bioinformatics	168	3715
2018-08	biophysics	78	1313
2018-08	cancer biology	60	959
2018-08	cell biology	107	1392
2018-08	clinical trials	2	48
2018-08	developmental biology	63	904
2018-08	ecology	59	1312
2018-08	epidemiology	66	746
2018-08	evolutionary biology	106	2599
2018-08	genetics	94	2047
2018-08	genomics	122	2580
2018-08	immunology	47	600
2018-08	microbiology	175	2269
2018-08	molecular biology	71	850
2018-08	neuroscience	315	5305
2018-08	paleontology	4	39
2018-08	pathology	11	122
2018-08	pharmacology and toxicology	14	204
2018-08	physiology	30	289
2018-08	plant biology	43	812
2018-08	scientific communication and education	12	198
2018-08	synthetic biology	16	342
2018-08	systems biology	53	1048
2018-08	zoology	14	146
2018-09	animal behavior and cognition	31	538
2018-09	biochemistry	57	876
2018-09	bioengineering	45	543
2018-09	bioinformatics	170	3885
2018-09	biophysics	82	1395
2018-09	cancer biology	64	1023
2018-09	cell biology	104	1496
2018-09	clinical trials	4	52
2018-09	developmental biology	82	986
2018-09	ecology	86	1398
2018-09	epidemiology	60	806
2018-09	evolutionary biology	124	2723
2018-09	genetics	93	2140
2018-09	genomics	113	2693
2018-09	immunology	41	641
2018-09	microbiology	160	2429
2018-09	molecular biology	71	921
2018-09	neuroscience	362	5667
2018-09	paleontology	7	46
2018-09	pathology	7	129
2018-09	pharmacology and toxicology	15	219
2018-09	physiology	14	303
2018-09	plant biology	39	851
2018-09	scientific communication and education	11	209
2018-09	synthetic biology	16	358
2018-09	systems biology	44	1092
2018-09	zoology	13	159
2018-10	animal behavior and cognition	46	584
2018-10	biochemistry	70	946
2018-10	bioengineering	37	580
2018-10	bioinformatics	180	4065
2018-10	biophysics	96	1491
2018-10	cancer biology	75	1098
2018-10	cell biology	109	1605
2018-10	clinical trials	4	56
2018-10	developmental biology	68	1054
2018-10	ecology	98	1496
2018-10	epidemiology	62	868
2018-10	evolutionary biology	111	2834
2018-10	genetics	106	2246
2018-10	genomics	126	2819
2018-10	immunology	52	693
2018-10	microbiology	192	2621
2018-10	molecular biology	73	994
2018-10	neuroscience	419	6086
2018-10	paleontology	2	48
2018-10	pathology	8	137
2018-10	pharmacology and toxicology	27	246
2018-10	physiology	25	328
2018-10	plant biology	49	900
2018-10	scientific communication and education	11	220
2018-10	synthetic biology	16	374
2018-10	systems biology	49	1141
2018-10	zoology	8	167
2018-11	animal behavior and cognition	25	609
2018-11	biochemistry	64	1010
2018-11	bioengineering	47	627
2018-11	bioinformatics	184	4249
2018-11	biophysics	75	1566
2018-11	cancer biology	64	1162
2018-11	cell biology	98	1703
2018-11	clinical trials	8	64
2018-11	developmental biology	67	1121
2018-11	ecology	73	1569
2018-11	epidemiology	81	949
2018-11	evolutionary biology	100	2934
2018-11	genetics	92	2338
2018-11	genomics	124	2943
2018-11	immunology	60	753
2018-11	microbiology	148	2769
2018-11	molecular biology	62	1056
2018-11	neuroscience	386	6472
2018-11	paleontology	4	52
2018-11	pathology	15	152
2018-11	pharmacology and toxicology	11	257
2018-11	physiology	30	358
2018-11	plant biology	57	957
2018-11	scientific communication and education	15	235
2018-11	synthetic biology	13	387
2018-11	systems biology	42	1183
2018-11	zoology	6	173
