# Supplementary material for: Tracking the popularity and outcomes of all bioRxiv preprints
Source: eLife journal article supplement (doi:10.7554/elife.45133), 2019-04-24
Supplement: supp [file elife-45133-supp-v1.zip › elife_poa_e45133_Figure_1_source_data_2.xlsx]

## Sheet: Sheet1
date	collection	submissions	cumulative		animal behavior and cognition	biochemistry	bioengineering	bioinformatics	biophysics	cancer biology	cell biology	clinical trials	developmental biology	ecology	epidemiology	evolutionary biology	genetics	genomics	immunology	microbiology	molecular biology	neuroscience	paleontology	pathology	pharmacology and toxicology	physiology	plant biology	scientific communication and education	synthetic biology	systems biology	zoology
2013-11	biochemistry	1	1		0	1	0	0	0	0	0	0	0	0	0	0	0	0	0	0	0	0	0	0	0	0	0	0	0	0	0
2013-11	bioinformatics	6	6		0	1	0	6	0	0	0	0	0	0	0	0	0	0	0	0	0	0	0	0	0	0	0	0	0	0	0
2013-11	biophysics	1	1		0	1	0	6	1	0	0	0	0	0	0	0	0	0	0	0	0	0	0	0	0	0	0	0	0	0	0
2013-11	cancer biology	2	2		0	1	0	6	1	2	0	0	0	0	0	0	0	0	0	0	0	0	0	0	0	0	0	0	0	0	0
2013-11	cell biology	1	1		0	1	0	6	1	2	1	0	0	0	0	0	0	0	0	0	0	0	0	0	0	0	0	0	0	0	0
2013-11	developmental biology	3	3		0	1	0	6	1	2	1	0	3	0	0	0	0	0	0	0	0	0	0	0	0	0	0	0	0	0	0
2013-11	ecology	4	4		0	1	0	6	1	2	1	0	3	4	0	0	0	0	0	0	0	0	0	0	0	0	0	0	0	0	0
2013-11	evolutionary biology	9	9		0	1	0	6	1	2	1	0	3	4	0	9	0	0	0	0	0	0	0	0	0	0	0	0	0	0	0
2013-11	genetics	4	4		0	1	0	6	1	2	1	0	3	4	0	9	4	0	0	0	0	0	0	0	0	0	0	0	0	0	0
2013-11	genomics	9	9		0	1	0	6	1	2	1	0	3	4	0	9	4	9	0	0	0	0	0	0	0	0	0	0	0	0	0
2013-11	immunology	2	2		0	1	0	6	1	2	1	0	3	4	0	9	4	9	2	0	0	0	0	0	0	0	0	0	0	0	0
2013-11	microbiology	1	1		0	1	0	6	1	2	1	0	3	4	0	9	4	9	2	1	0	0	0	0	0	0	0	0	0	0	0
2013-11	molecular biology	2	2		0	1	0	6	1	2	1	0	3	4	0	9	4	9	2	1	2	0	0	0	0	0	0	0	0	0	0
2013-11	neuroscience	3	3		0	1	0	6	1	2	1	0	3	4	0	9	4	9	2	1	2	3	0	0	0	0	0	0	0	0	0
2013-11	plant biology	3	3		0	1	0	6	1	2	1	0	3	4	0	9	4	9	2	1	2	3	0	0	0	0	3	0	0	0	0
2013-11	synthetic biology	4	4		0	1	0	6	1	2	1	0	3	4	0	9	4	9	2	1	2	3	0	0	0	0	3	0	4	0	0
2013-11	systems biology	4	4		0	1	0	6	1	2	1	0	3	4	0	9	4	9	2	1	2	3	0	0	0	0	3	0	4	4	0
2013-11	zoology	1	1		0	1	0	6	1	2	1	0	3	4	0	9	4	9	2	1	2	3	0	0	0	0	3	0	4	4	1
2013-12	bioengineering	1	1		0	1	1	6	1	2	1	0	3	4	0	9	4	9	2	1	2	3	0	0	0	0	3	0	4	4	1
2013-12	bioinformatics	8	14		0	1	1	14	1	2	1	0	3	4	0	9	4	9	2	1	2	3	0	0	0	0	3	0	4	4	1
2013-12	biophysics	3	4		0	1	1	14	4	2	1	0	3	4	0	9	4	9	2	1	2	3	0	0	0	0	3	0	4	4	1
2013-12	cancer biology	2	4		0	1	1	14	4	4	1	0	3	4	0	9	4	9	2	1	2	3	0	0	0	0	3	0	4	4	1
2013-12	cell biology	1	2		0	1	1	14	4	4	2	0	3	4	0	9	4	9	2	1	2	3	0	0	0	0	3	0	4	4	1
2013-12	ecology	5	9		0	1	1	14	4	4	2	0	3	9	0	9	4	9	2	1	2	3	0	0	0	0	3	0	4	4	1
2013-12	evolutionary biology	8	17		0	1	1	14	4	4	2	0	3	9	0	17	4	9	2	1	2	3	0	0	0	0	3	0	4	4	1
2013-12	genetics	5	9		0	1	1	14	4	4	2	0	3	9	0	17	9	9	2	1	2	3	0	0	0	0	3	0	4	4	1
2013-12	genomics	4	13		0	1	1	14	4	4	2	0	3	9	0	17	9	13	2	1	2	3	0	0	0	0	3	0	4	4	1
2013-12	microbiology	2	3		0	1	1	14	4	4	2	0	3	9	0	17	9	13	2	3	2	3	0	0	0	0	3	0	4	4	1
2013-12	neuroscience	6	9		0	1	1	14	4	4	2	0	3	9	0	17	9	13	2	3	2	9	0	0	0	0	3	0	4	4	1
2013-12	plant biology	2	5		0	1	1	14	4	4	2	0	3	9	0	17	9	13	2	3	2	9	0	0	0	0	5	0	4	4	1
2013-12	synthetic biology	1	5		0	1	1	14	4	4	2	0	3	9	0	17	9	13	2	3	2	9	0	0	0	0	5	0	5	4	1
2013-12	zoology	1	2		0	1	1	14	4	4	2	0	3	9	0	17	9	13	2	3	2	9	0	0	0	0	5	0	5	4	2
2014-01	biochemistry	2	3		0	3	1	14	4	4	2	0	3	9	0	17	9	13	2	3	2	9	0	0	0	0	5	0	5	4	2
2014-01	bioinformatics	9	23		0	3	1	23	4	4	2	0	3	9	0	17	9	13	2	3	2	9	0	0	0	0	5	0	5	4	2
2014-01	biophysics	4	8		0	3	1	23	8	4	2	0	3	9	0	17	9	13	2	3	2	9	0	0	0	0	5	0	5	4	2
2014-01	cancer biology	1	5		0	3	1	23	8	5	2	0	3	9	0	17	9	13	2	3	2	9	0	0	0	0	5	0	5	4	2
2014-01	cell biology	4	6		0	3	1	23	8	5	6	0	3	9	0	17	9	13	2	3	2	9	0	0	0	0	5	0	5	4	2
2014-01	developmental biology	2	5		0	3	1	23	8	5	6	0	5	9	0	17	9	13	2	3	2	9	0	0	0	0	5	0	5	4	2
2014-01	ecology	8	17		0	3	1	23	8	5	6	0	5	17	0	17	9	13	2	3	2	9	0	0	0	0	5	0	5	4	2
2014-01	evolutionary biology	6	23		0	3	1	23	8	5	6	0	5	17	0	23	9	13	2	3	2	9	0	0	0	0	5	0	5	4	2
2014-01	genetics	2	11		0	3	1	23	8	5	6	0	5	17	0	23	11	13	2	3	2	9	0	0	0	0	5	0	5	4	2
2014-01	genomics	10	23		0	3	1	23	8	5	6	0	5	17	0	23	11	23	2	3	2	9	0	0	0	0	5	0	5	4	2
2014-01	immunology	2	4		0	3	1	23	8	5	6	0	5	17	0	23	11	23	4	3	2	9	0	0	0	0	5	0	5	4	2
2014-01	microbiology	1	4		0	3	1	23	8	5	6	0	5	17	0	23	11	23	4	4	2	9	0	0	0	0	5	0	5	4	2
2014-01	molecular biology	1	3		0	3	1	23	8	5	6	0	5	17	0	23	11	23	4	4	3	9	0	0	0	0	5	0	5	4	2
2014-01	neuroscience	1	10		0	3	1	23	8	5	6	0	5	17	0	23	11	23	4	4	3	10	0	0	0	0	5	0	5	4	2
2014-01	systems biology	1	5		0	3	1	23	8	5	6	0	5	17	0	23	11	23	4	4	3	10	0	0	0	0	5	0	5	5	2
2014-02	bioinformatics	16	39		0	3	1	39	8	5	6	0	5	17	0	23	11	23	4	4	3	10	0	0	0	0	5	0	5	5	2
2014-02	biophysics	2	10		0	3	1	39	10	5	6	0	5	17	0	23	11	23	4	4	3	10	0	0	0	0	5	0	5	5	2
2014-02	cancer biology	1	6		0	3	1	39	10	6	6	0	5	17	0	23	11	23	4	4	3	10	0	0	0	0	5	0	5	5	2
2014-02	cell biology	3	9		0	3	1	39	10	6	9	0	5	17	0	23	11	23	4	4	3	10	0	0	0	0	5	0	5	5	2
2014-02	developmental biology	2	7		0	3	1	39	10	6	9	0	7	17	0	23	11	23	4	4	3	10	0	0	0	0	5	0	5	5	2
2014-02	ecology	5	22		0	3	1	39	10	6	9	0	7	22	0	23	11	23	4	4	3	10	0	0	0	0	5	0	5	5	2
2014-02	evolutionary biology	14	37		0	3	1	39	10	6	9	0	7	22	0	37	11	23	4	4	3	10	0	0	0	0	5	0	5	5	2
2014-02	genetics	4	15		0	3	1	39	10	6	9	0	7	22	0	37	15	23	4	4	3	10	0	0	0	0	5	0	5	5	2
2014-02	genomics	5	28		0	3	1	39	10	6	9	0	7	22	0	37	15	28	4	4	3	10	0	0	0	0	5	0	5	5	2
2014-02	immunology	2	6		0	3	1	39	10	6	9	0	7	22	0	37	15	28	6	4	3	10	0	0	0	0	5	0	5	5	2
2014-02	microbiology	2	6		0	3	1	39	10	6	9	0	7	22	0	37	15	28	6	6	3	10	0	0	0	0	5	0	5	5	2
2014-02	neuroscience	5	15		0	3	1	39	10	6	9	0	7	22	0	37	15	28	6	6	3	15	0	0	0	0	5	0	5	5	2
2014-02	plant biology	2	7		0	3	1	39	10	6	9	0	7	22	0	37	15	28	6	6	3	15	0	0	0	0	7	0	5	5	2
2014-02	synthetic biology	1	6		0	3	1	39	10	6	9	0	7	22	0	37	15	28	6	6	3	15	0	0	0	0	7	0	6	5	2
2014-02	systems biology	1	6		0	3	1	39	10	6	9	0	7	22	0	37	15	28	6	6	3	15	0	0	0	0	7	0	6	6	2
2014-02	zoology	1	3		0	3	1	39	10	6	9	0	7	22	0	37	15	28	6	6	3	15	0	0	0	0	7	0	6	6	3
2014-03	bioengineering	1	2		0	3	2	39	10	6	9	0	7	22	0	37	15	28	6	6	3	15	0	0	0	0	7	0	6	6	3
2014-03	bioinformatics	7	46		0	3	2	46	10	6	9	0	7	22	0	37	15	28	6	6	3	15	0	0	0	0	7	0	6	6	3
2014-03	biophysics	1	11		0	3	2	46	11	6	9	0	7	22	0	37	15	28	6	6	3	15	0	0	0	0	7	0	6	6	3
2014-03	cell biology	4	13		0	3	2	46	11	6	13	0	7	22	0	37	15	28	6	6	3	15	0	0	0	0	7	0	6	6	3
2014-03	ecology	4	26		0	3	2	46	11	6	13	0	7	26	0	37	15	28	6	6	3	15	0	0	0	0	7	0	6	6	3
2014-03	evolutionary biology	8	45		0	3	2	46	11	6	13	0	7	26	0	45	15	28	6	6	3	15	0	0	0	0	7	0	6	6	3
2014-03	genetics	3	18		0	3	2	46	11	6	13	0	7	26	0	45	18	28	6	6	3	15	0	0	0	0	7	0	6	6	3
2014-03	genomics	4	32		0	3	2	46	11	6	13	0	7	26	0	45	18	32	6	6	3	15	0	0	0	0	7	0	6	6	3
2014-03	microbiology	1	7		0	3	2	46	11	6	13	0	7	26	0	45	18	32	6	7	3	15	0	0	0	0	7	0	6	6	3
2014-03	molecular biology	1	4		0	3	2	46	11	6	13	0	7	26	0	45	18	32	6	7	4	15	0	0	0	0	7	0	6	6	3
2014-03	neuroscience	1	16		0	3	2	46	11	6	13	0	7	26	0	45	18	32	6	7	4	16	0	0	0	0	7	0	6	6	3
2014-03	plant biology	1	8		0	3	2	46	11	6	13	0	7	26	0	45	18	32	6	7	4	16	0	0	0	0	8	0	6	6	3
2014-03	scientific communication and education	1	1		0	3	2	46	11	6	13	0	7	26	0	45	18	32	6	7	4	16	0	0	0	0	8	1	6	6	3
2014-03	synthetic biology	3	9		0	3	2	46	11	6	13	0	7	26	0	45	18	32	6	7	4	16	0	0	0	0	8	1	9	6	3
2014-03	systems biology	3	9		0	3	2	46	11	6	13	0	7	26	0	45	18	32	6	7	4	16	0	0	0	0	8	1	9	9	3
2014-04	biochemistry	2	5		0	5	2	46	11	6	13	0	7	26	0	45	18	32	6	7	4	16	0	0	0	0	8	1	9	9	3
2014-04	bioinformatics	8	54		0	5	2	54	11	6	13	0	7	26	0	45	18	32	6	7	4	16	0	0	0	0	8	1	9	9	3
2014-04	biophysics	1	12		0	5	2	54	12	6	13	0	7	26	0	45	18	32	6	7	4	16	0	0	0	0	8	1	9	9	3
2014-04	cell biology	1	14		0	5	2	54	12	6	14	0	7	26	0	45	18	32	6	7	4	16	0	0	0	0	8	1	9	9	3
2014-04	developmental biology	1	8		0	5	2	54	12	6	14	0	8	26	0	45	18	32	6	7	4	16	0	0	0	0	8	1	9	9	3
2014-04	ecology	3	29		0	5	2	54	12	6	14	0	8	29	0	45	18	32	6	7	4	16	0	0	0	0	8	1	9	9	3
2014-04	evolutionary biology	21	66		0	5	2	54	12	6	14	0	8	29	0	66	18	32	6	7	4	16	0	0	0	0	8	1	9	9	3
2014-04	genetics	2	20		0	5	2	54	12	6	14	0	8	29	0	66	20	32	6	7	4	16	0	0	0	0	8	1	9	9	3
2014-04	genomics	9	41		0	5	2	54	12	6	14	0	8	29	0	66	20	41	6	7	4	16	0	0	0	0	8	1	9	9	3
2014-04	immunology	3	9		0	5	2	54	12	6	14	0	8	29	0	66	20	41	9	7	4	16	0	0	0	0	8	1	9	9	3
2014-04	molecular biology	2	6		0	5	2	54	12	6	14	0	8	29	0	66	20	41	9	7	6	16	0	0	0	0	8	1	9	9	3
2014-04	neuroscience	4	20		0	5	2	54	12	6	14	0	8	29	0	66	20	41	9	7	6	20	0	0	0	0	8	1	9	9	3
2014-04	pathology	1	1		0	5	2	54	12	6	14	0	8	29	0	66	20	41	9	7	6	20	0	1	0	0	8	1	9	9	3
2014-04	physiology	1	1		0	5	2	54	12	6	14	0	8	29	0	66	20	41	9	7	6	20	0	1	0	1	8	1	9	9	3
2014-04	synthetic biology	3	12		0	5	2	54	12	6	14	0	8	29	0	66	20	41	9	7	6	20	0	1	0	1	8	1	12	9	3
2014-04	systems biology	4	13		0	5	2	54	12	6	14	0	8	29	0	66	20	41	9	7	6	20	0	1	0	1	8	1	12	13	3
2014-05	bioinformatics	15	69		0	5	2	69	12	6	14	0	8	29	0	66	20	41	9	7	6	20	0	1	0	1	8	1	12	13	3
2014-05	biophysics	1	13		0	5	2	69	13	6	14	0	8	29	0	66	20	41	9	7	6	20	0	1	0	1	8	1	12	13	3
2014-05	cancer biology	4	10		0	5	2	69	13	10	14	0	8	29	0	66	20	41	9	7	6	20	0	1	0	1	8	1	12	13	3
2014-05	cell biology	1	15		0	5	2	69	13	10	15	0	8	29	0	66	20	41	9	7	6	20	0	1	0	1	8	1	12	13	3
2014-05	developmental biology	2	10		0	5	2	69	13	10	15	0	10	29	0	66	20	41	9	7	6	20	0	1	0	1	8	1	12	13	3
2014-05	ecology	5	34		0	5	2	69	13	10	15	0	10	34	0	66	20	41	9	7	6	20	0	1	0	1	8	1	12	13	3
2014-05	evolutionary biology	10	76		0	5	2	69	13	10	15	0	10	34	0	76	20	41	9	7	6	20	0	1	0	1	8	1	12	13	3
2014-05	genetics	10	30		0	5	2	69	13	10	15	0	10	34	0	76	30	41	9	7	6	20	0	1	0	1	8	1	12	13	3
2014-05	genomics	10	51		0	5	2	69	13	10	15	0	10	34	0	76	30	51	9	7	6	20	0	1	0	1	8	1	12	13	3
2014-05	microbiology	2	9		0	5	2	69	13	10	15	0	10	34	0	76	30	51	9	9	6	20	0	1	0	1	8	1	12	13	3
2014-05	molecular biology	1	7		0	5	2	69	13	10	15	0	10	34	0	76	30	51	9	9	7	20	0	1	0	1	8	1	12	13	3
2014-05	neuroscience	9	29		0	5	2	69	13	10	15	0	10	34	0	76	30	51	9	9	7	29	0	1	0	1	8	1	12	13	3
2014-05	pharmacology and toxicology	2	2		0	5	2	69	13	10	15	0	10	34	0	76	30	51	9	9	7	29	0	1	2	1	8	1	12	13	3
2014-05	physiology	1	2		0	5	2	69	13	10	15	0	10	34	0	76	30	51	9	9	7	29	0	1	2	2	8	1	12	13	3
2014-05	plant biology	1	9		0	5	2	69	13	10	15	0	10	34	0	76	30	51	9	9	7	29	0	1	2	2	9	1	12	13	3
2014-05	systems biology	7	20		0	5	2	69	13	10	15	0	10	34	0	76	30	51	9	9	7	29	0	1	2	2	9	1	12	20	3
2014-06	biochemistry	1	6		0	6	2	69	13	10	15	0	10	34	0	76	30	51	9	9	7	29	0	1	2	2	9	1	12	20	3
2014-06	bioengineering	1	3		0	6	3	69	13	10	15	0	10	34	0	76	30	51	9	9	7	29	0	1	2	2	9	1	12	20	3
2014-06	bioinformatics	14	83		0	6	3	83	13	10	15	0	10	34	0	76	30	51	9	9	7	29	0	1	2	2	9	1	12	20	3
2014-06	biophysics	1	14		0	6	3	83	14	10	15	0	10	34	0	76	30	51	9	9	7	29	0	1	2	2	9	1	12	20	3
2014-06	cell biology	1	16		0	6	3	83	14	10	16	0	10	34	0	76	30	51	9	9	7	29	0	1	2	2	9	1	12	20	3
2014-06	developmental biology	3	13		0	6	3	83	14	10	16	0	13	34	0	76	30	51	9	9	7	29	0	1	2	2	9	1	12	20	3
2014-06	ecology	1	35		0	6	3	83	14	10	16	0	13	35	0	76	30	51	9	9	7	29	0	1	2	2	9	1	12	20	3
2014-06	evolutionary biology	17	93		0	6	3	83	14	10	16	0	13	35	0	93	30	51	9	9	7	29	0	1	2	2	9	1	12	20	3
2014-06	genetics	3	33		0	6	3	83	14	10	16	0	13	35	0	93	33	51	9	9	7	29	0	1	2	2	9	1	12	20	3
2014-06	genomics	15	66		0	6	3	83	14	10	16	0	13	35	0	93	33	66	9	9	7	29	0	1	2	2	9	1	12	20	3
2014-06	immunology	1	10		0	6	3	83	14	10	16	0	13	35	0	93	33	66	10	9	7	29	0	1	2	2	9	1	12	20	3
2014-06	microbiology	1	10		0	6	3	83	14	10	16	0	13	35	0	93	33	66	10	10	7	29	0	1	2	2	9	1	12	20	3
2014-06	molecular biology	1	8		0	6	3	83	14	10	16	0	13	35	0	93	33	66	10	10	8	29	0	1	2	2	9	1	12	20	3
2014-06	neuroscience	6	35		0	6	3	83	14	10	16	0	13	35	0	93	33	66	10	10	8	35	0	1	2	2	9	1	12	20	3
2014-06	paleontology	1	1		0	6	3	83	14	10	16	0	13	35	0	93	33	66	10	10	8	35	1	1	2	2	9	1	12	20	3
2014-06	plant biology	2	11		0	6	3	83	14	10	16	0	13	35	0	93	33	66	10	10	8	35	1	1	2	2	11	1	12	20	3
2014-06	synthetic biology	1	13		0	6	3	83	14	10	16	0	13	35	0	93	33	66	10	10	8	35	1	1	2	2	11	1	13	20	3
2014-06	zoology	2	5		0	6	3	83	14	10	16	0	13	35	0	93	33	66	10	10	8	35	1	1	2	2	11	1	13	20	5
2014-07	animal behavior and cognition	2	2		2	6	3	83	14	10	16	0	13	35	0	93	33	66	10	10	8	35	1	1	2	2	11	1	13	20	5
2014-07	bioinformatics	14	97		2	6	3	97	14	10	16	0	13	35	0	93	33	66	10	10	8	35	1	1	2	2	11	1	13	20	5
2014-07	biophysics	2	16		2	6	3	97	16	10	16	0	13	35	0	93	33	66	10	10	8	35	1	1	2	2	11	1	13	20	5
2014-07	cell biology	2	18		2	6	3	97	16	10	18	0	13	35	0	93	33	66	10	10	8	35	1	1	2	2	11	1	13	20	5
2014-07	ecology	4	39		2	6	3	97	16	10	18	0	13	39	0	93	33	66	10	10	8	35	1	1	2	2	11	1	13	20	5
2014-07	evolutionary biology	11	104		2	6	3	97	16	10	18	0	13	39	0	104	33	66	10	10	8	35	1	1	2	2	11	1	13	20	5
2014-07	genetics	4	37		2	6	3	97	16	10	18	0	13	39	0	104	37	66	10	10	8	35	1	1	2	2	11	1	13	20	5
2014-07	genomics	13	79		2	6	3	97	16	10	18	0	13	39	0	104	37	79	10	10	8	35	1	1	2	2	11	1	13	20	5
2014-07	immunology	2	12		2	6	3	97	16	10	18	0	13	39	0	104	37	79	12	10	8	35	1	1	2	2	11	1	13	20	5
2014-07	microbiology	1	11		2	6	3	97	16	10	18	0	13	39	0	104	37	79	12	11	8	35	1	1	2	2	11	1	13	20	5
2014-07	molecular biology	1	9		2	6	3	97	16	10	18	0	13	39	0	104	37	79	12	11	9	35	1	1	2	2	11	1	13	20	5
2014-07	neuroscience	2	37		2	6	3	97	16	10	18	0	13	39	0	104	37	79	12	11	9	37	1	1	2	2	11	1	13	20	5
2014-07	scientific communication and education	2	3		2	6	3	97	16	10	18	0	13	39	0	104	37	79	12	11	9	37	1	1	2	2	11	3	13	20	5
2014-07	synthetic biology	2	15		2	6	3	97	16	10	18	0	13	39	0	104	37	79	12	11	9	37	1	1	2	2	11	3	15	20	5
2014-07	systems biology	5	25		2	6	3	97	16	10	18	0	13	39	0	104	37	79	12	11	9	37	1	1	2	2	11	3	15	25	5
2014-08	animal behavior and cognition	3	5		5	6	3	97	16	10	18	0	13	39	0	104	37	79	12	11	9	37	1	1	2	2	11	3	15	25	5
2014-08	bioengineering	1	4		5	6	4	97	16	10	18	0	13	39	0	104	37	79	12	11	9	37	1	1	2	2	11	3	15	25	5
2014-08	bioinformatics	15	112		5	6	4	112	16	10	18	0	13	39	0	104	37	79	12	11	9	37	1	1	2	2	11	3	15	25	5
2014-08	biophysics	1	17		5	6	4	112	17	10	18	0	13	39	0	104	37	79	12	11	9	37	1	1	2	2	11	3	15	25	5
2014-08	cancer biology	1	11		5	6	4	112	17	11	18	0	13	39	0	104	37	79	12	11	9	37	1	1	2	2	11	3	15	25	5
2014-08	cell biology	2	20		5	6	4	112	17	11	20	0	13	39	0	104	37	79	12	11	9	37	1	1	2	2	11	3	15	25	5
2014-08	developmental biology	3	16		5	6	4	112	17	11	20	0	16	39	0	104	37	79	12	11	9	37	1	1	2	2	11	3	15	25	5
2014-08	ecology	7	46		5	6	4	112	17	11	20	0	16	46	0	104	37	79	12	11	9	37	1	1	2	2	11	3	15	25	5
2014-08	evolutionary biology	17	121		5	6	4	112	17	11	20	0	16	46	0	121	37	79	12	11	9	37	1	1	2	2	11	3	15	25	5
2014-08	genetics	7	44		5	6	4	112	17	11	20	0	16	46	0	121	44	79	12	11	9	37	1	1	2	2	11	3	15	25	5
2014-08	genomics	11	90		5	6	4	112	17	11	20	0	16	46	0	121	44	90	12	11	9	37	1	1	2	2	11	3	15	25	5
2014-08	microbiology	1	12		5	6	4	112	17	11	20	0	16	46	0	121	44	90	12	12	9	37	1	1	2	2	11	3	15	25	5
2014-08	neuroscience	4	41		5	6	4	112	17	11	20	0	16	46	0	121	44	90	12	12	9	41	1	1	2	2	11	3	15	25	5
2014-08	plant biology	1	12		5	6	4	112	17	11	20	0	16	46	0	121	44	90	12	12	9	41	1	1	2	2	12	3	15	25	5
2014-08	synthetic biology	1	16		5	6	4	112	17	11	20	0	16	46	0	121	44	90	12	12	9	41	1	1	2	2	12	3	16	25	5
2014-08	systems biology	4	29		5	6	4	112	17	11	20	0	16	46	0	121	44	90	12	12	9	41	1	1	2	2	12	3	16	29	5
2014-08	zoology	1	6		5	6	4	112	17	11	20	0	16	46	0	121	44	90	12	12	9	41	1	1	2	2	12	3	16	29	6
2014-09	animal behavior and cognition	1	6		6	6	4	112	17	11	20	0	16	46	0	121	44	90	12	12	9	41	1	1	2	2	12	3	16	29	6
2014-09	bioinformatics	13	125		6	6	4	125	17	11	20	0	16	46	0	121	44	90	12	12	9	41	1	1	2	2	12	3	16	29	6
2014-09	biophysics	4	21		6	6	4	125	21	11	20	0	16	46	0	121	44	90	12	12	9	41	1	1	2	2	12	3	16	29	6
2014-09	cancer biology	2	13		6	6	4	125	21	13	20	0	16	46	0	121	44	90	12	12	9	41	1	1	2	2	12	3	16	29	6
2014-09	developmental biology	2	18		6	6	4	125	21	13	20	0	18	46	0	121	44	90	12	12	9	41	1	1	2	2	12	3	16	29	6
2014-09	ecology	5	51		6	6	4	125	21	13	20	0	18	51	0	121	44	90	12	12	9	41	1	1	2	2	12	3	16	29	6
2014-09	evolutionary biology	16	137		6	6	4	125	21	13	20	0	18	51	0	137	44	90	12	12	9	41	1	1	2	2	12	3	16	29	6
2014-09	genetics	13	57		6	6	4	125	21	13	20	0	18	51	0	137	57	90	12	12	9	41	1	1	2	2	12	3	16	29	6
2014-09	genomics	20	110		6	6	4	125	21	13	20	0	18	51	0	137	57	110	12	12	9	41	1	1	2	2	12	3	16	29	6
2014-09	microbiology	3	15		6	6	4	125	21	13	20	0	18	51	0	137	57	110	12	15	9	41	1	1	2	2	12	3	16	29	6
2014-09	molecular biology	1	10		6	6	4	125	21	13	20	0	18	51	0	137	57	110	12	15	10	41	1	1	2	2	12	3	16	29	6
2014-09	neuroscience	6	47		6	6	4	125	21	13	20	0	18	51	0	137	57	110	12	15	10	47	1	1	2	2	12	3	16	29	6
2014-09	physiology	1	3		6	6	4	125	21	13	20	0	18	51	0	137	57	110	12	15	10	47	1	1	2	3	12	3	16	29	6
2014-09	synthetic biology	3	19		6	6	4	125	21	13	20	0	18	51	0	137	57	110	12	15	10	47	1	1	2	3	12	3	19	29	6
2014-09	systems biology	2	31		6	6	4	125	21	13	20	0	18	51	0	137	57	110	12	15	10	47	1	1	2	3	12	3	19	31	6
2014-09	zoology	1	7		6	6	4	125	21	13	20	0	18	51	0	137	57	110	12	15	10	47	1	1	2	3	12	3	19	31	7
2014-10	animal behavior and cognition	1	7		7	6	4	125	21	13	20	0	18	51	0	137	57	110	12	15	10	47	1	1	2	3	12	3	19	31	7
2014-10	bioinformatics	18	143		7	6	4	143	21	13	20	0	18	51	0	137	57	110	12	15	10	47	1	1	2	3	12	3	19	31	7
2014-10	cancer biology	2	15		7	6	4	143	21	15	20	0	18	51	0	137	57	110	12	15	10	47	1	1	2	3	12	3	19	31	7
2014-10	developmental biology	4	22		7	6	4	143	21	15	20	0	22	51	0	137	57	110	12	15	10	47	1	1	2	3	12	3	19	31	7
2014-10	ecology	6	57		7	6	4	143	21	15	20	0	22	57	0	137	57	110	12	15	10	47	1	1	2	3	12	3	19	31	7
2014-10	evolutionary biology	21	158		7	6	4	143	21	15	20	0	22	57	0	158	57	110	12	15	10	47	1	1	2	3	12	3	19	31	7
2014-10	genetics	8	65		7	6	4	143	21	15	20	0	22	57	0	158	65	110	12	15	10	47	1	1	2	3	12	3	19	31	7
2014-10	genomics	11	121		7	6	4	143	21	15	20	0	22	57	0	158	65	121	12	15	10	47	1	1	2	3	12	3	19	31	7
2014-10	immunology	1	13		7	6	4	143	21	15	20	0	22	57	0	158	65	121	13	15	10	47	1	1	2	3	12	3	19	31	7
2014-10	microbiology	1	16		7	6	4	143	21	15	20	0	22	57	0	158	65	121	13	16	10	47	1	1	2	3	12	3	19	31	7
2014-10	molecular biology	1	11		7	6	4	143	21	15	20	0	22	57	0	158	65	121	13	16	11	47	1	1	2	3	12	3	19	31	7
2014-10	neuroscience	9	56		7	6	4	143	21	15	20	0	22	57	0	158	65	121	13	16	11	56	1	1	2	3	12	3	19	31	7
2014-10	plant biology	1	13		7	6	4	143	21	15	20	0	22	57	0	158	65	121	13	16	11	56	1	1	2	3	13	3	19	31	7
2014-10	scientific communication and education	1	4		7	6	4	143	21	15	20	0	22	57	0	158	65	121	13	16	11	56	1	1	2	3	13	4	19	31	7
2014-10	synthetic biology	1	20		7	6	4	143	21	15	20	0	22	57	0	158	65	121	13	16	11	56	1	1	2	3	13	4	20	31	7
2014-10	systems biology	1	32		7	6	4	143	21	15	20	0	22	57	0	158	65	121	13	16	11	56	1	1	2	3	13	4	20	32	7
2014-10	zoology	1	8		7	6	4	143	21	15	20	0	22	57	0	158	65	121	13	16	11	56	1	1	2	3	13	4	20	32	8
2014-11	animal behavior and cognition	3	10		10	6	4	143	21	15	20	0	22	57	0	158	65	121	13	16	11	56	1	1	2	3	13	4	20	32	8
2014-11	bioinformatics	20	163		10	6	4	163	21	15	20	0	22	57	0	158	65	121	13	16	11	56	1	1	2	3	13	4	20	32	8
2014-11	biophysics	1	22		10	6	4	163	22	15	20	0	22	57	0	158	65	121	13	16	11	56	1	1	2	3	13	4	20	32	8
2014-11	cancer biology	1	16		10	6	4	163	22	16	20	0	22	57	0	158	65	121	13	16	11	56	1	1	2	3	13	4	20	32	8
2014-11	developmental biology	2	24		10	6	4	163	22	16	20	0	24	57	0	158	65	121	13	16	11	56	1	1	2	3	13	4	20	32	8
2014-11	ecology	4	61		10	6	4	163	22	16	20	0	24	61	0	158	65	121	13	16	11	56	1	1	2	3	13	4	20	32	8
2014-11	evolutionary biology	18	176		10	6	4	163	22	16	20	0	24	61	0	176	65	121	13	16	11	56	1	1	2	3	13	4	20	32	8
2014-11	genetics	5	70		10	6	4	163	22	16	20	0	24	61	0	176	70	121	13	16	11	56	1	1	2	3	13	4	20	32	8
2014-11	genomics	7	128		10	6	4	163	22	16	20	0	24	61	0	176	70	128	13	16	11	56	1	1	2	3	13	4	20	32	8
2014-11	immunology	1	14		10	6	4	163	22	16	20	0	24	61	0	176	70	128	14	16	11	56	1	1	2	3	13	4	20	32	8
2014-11	microbiology	1	17		10	6	4	163	22	16	20	0	24	61	0	176	70	128	14	17	11	56	1	1	2	3	13	4	20	32	8
2014-11	molecular biology	3	14		10	6	4	163	22	16	20	0	24	61	0	176	70	128	14	17	14	56	1	1	2	3	13	4	20	32	8
2014-11	neuroscience	5	61		10	6	4	163	22	16	20	0	24	61	0	176	70	128	14	17	14	61	1	1	2	3	13	4	20	32	8
2014-11	physiology	1	4		10	6	4	163	22	16	20	0	24	61	0	176	70	128	14	17	14	61	1	1	2	4	13	4	20	32	8
2014-11	plant biology	2	15		10	6	4	163	22	16	20	0	24	61	0	176	70	128	14	17	14	61	1	1	2	4	15	4	20	32	8
2014-11	systems biology	6	38		10	6	4	163	22	16	20	0	24	61	0	176	70	128	14	17	14	61	1	1	2	4	15	4	20	38	8
2014-11	zoology	1	9		10	6	4	163	22	16	20	0	24	61	0	176	70	128	14	17	14	61	1	1	2	4	15	4	20	38	9
2014-12	bioengineering	2	6		10	6	6	163	22	16	20	0	24	61	0	176	70	128	14	17	14	61	1	1	2	4	15	4	20	38	9
2014-12	bioinformatics	10	173		10	6	6	173	22	16	20	0	24	61	0	176	70	128	14	17	14	61	1	1	2	4	15	4	20	38	9
2014-12	biophysics	3	25		10	6	6	173	25	16	20	0	24	61	0	176	70	128	14	17	14	61	1	1	2	4	15	4	20	38	9
2014-12	cancer biology	2	18		10	6	6	173	25	18	20	0	24	61	0	176	70	128	14	17	14	61	1	1	2	4	15	4	20	38	9
2014-12	developmental biology	2	26		10	6	6	173	25	18	20	0	26	61	0	176	70	128	14	17	14	61	1	1	2	4	15	4	20	38	9
2014-12	ecology	5	66		10	6	6	173	25	18	20	0	26	66	0	176	70	128	14	17	14	61	1	1	2	4	15	4	20	38	9
2014-12	evolutionary biology	15	191		10	6	6	173	25	18	20	0	26	66	0	191	70	128	14	17	14	61	1	1	2	4	15	4	20	38	9
2014-12	genetics	9	79		10	6	6	173	25	18	20	0	26	66	0	191	79	128	14	17	14	61	1	1	2	4	15	4	20	38	9
2014-12	genomics	19	147		10	6	6	173	25	18	20	0	26	66	0	191	79	147	14	17	14	61	1	1	2	4	15	4	20	38	9
2014-12	immunology	1	15		10	6	6	173	25	18	20	0	26	66	0	191	79	147	15	17	14	61	1	1	2	4	15	4	20	38	9
2014-12	microbiology	1	18		10	6	6	173	25	18	20	0	26	66	0	191	79	147	15	18	14	61	1	1	2	4	15	4	20	38	9
2014-12	molecular biology	2	16		10	6	6	173	25	18	20	0	26	66	0	191	79	147	15	18	16	61	1	1	2	4	15	4	20	38	9
2014-12	neuroscience	10	71		10	6	6	173	25	18	20	0	26	66	0	191	79	147	15	18	16	71	1	1	2	4	15	4	20	38	9
2014-12	physiology	3	7		10	6	6	173	25	18	20	0	26	66	0	191	79	147	15	18	16	71	1	1	2	7	15	4	20	38	9
2014-12	plant biology	1	16		10	6	6	173	25	18	20	0	26	66	0	191	79	147	15	18	16	71	1	1	2	7	16	4	20	38	9
2014-12	scientific communication and education	1	5		10	6	6	173	25	18	20	0	26	66	0	191	79	147	15	18	16	71	1	1	2	7	16	5	20	38	9
2014-12	synthetic biology	2	22		10	6	6	173	25	18	20	0	26	66	0	191	79	147	15	18	16	71	1	1	2	7	16	5	22	38	9
2014-12	systems biology	7	45		10	6	6	173	25	18	20	0	26	66	0	191	79	147	15	18	16	71	1	1	2	7	16	5	22	45	9
2015-01	animal behavior and cognition	2	12		12	6	6	173	25	18	20	0	26	66	0	191	79	147	15	18	16	71	1	1	2	7	16	5	22	45	9
2015-01	biochemistry	2	8		12	8	6	173	25	18	20	0	26	66	0	191	79	147	15	18	16	71	1	1	2	7	16	5	22	45	9
2015-01	bioengineering	2	8		12	8	8	173	25	18	20	0	26	66	0	191	79	147	15	18	16	71	1	1	2	7	16	5	22	45	9
2015-01	bioinformatics	20	193		12	8	8	193	25	18	20	0	26	66	0	191	79	147	15	18	16	71	1	1	2	7	16	5	22	45	9
2015-01	biophysics	3	28		12	8	8	193	28	18	20	0	26	66	0	191	79	147	15	18	16	71	1	1	2	7	16	5	22	45	9
2015-01	cancer biology	3	21		12	8	8	193	28	21	20	0	26	66	0	191	79	147	15	18	16	71	1	1	2	7	16	5	22	45	9
2015-01	cell biology	2	22		12	8	8	193	28	21	22	0	26	66	0	191	79	147	15	18	16	71	1	1	2	7	16	5	22	45	9
2015-01	developmental biology	1	27		12	8	8	193	28	21	22	0	27	66	0	191	79	147	15	18	16	71	1	1	2	7	16	5	22	45	9
2015-01	ecology	5	71		12	8	8	193	28	21	22	0	27	71	0	191	79	147	15	18	16	71	1	1	2	7	16	5	22	45	9
2015-01	evolutionary biology	22	213		12	8	8	193	28	21	22	0	27	71	0	213	79	147	15	18	16	71	1	1	2	7	16	5	22	45	9
2015-01	genetics	9	88		12	8	8	193	28	21	22	0	27	71	0	213	88	147	15	18	16	71	1	1	2	7	16	5	22	45	9
2015-01	genomics	13	160		12	8	8	193	28	21	22	0	27	71	0	213	88	160	15	18	16	71	1	1	2	7	16	5	22	45	9
2015-01	immunology	1	16		12	8	8	193	28	21	22	0	27	71	0	213	88	160	16	18	16	71	1	1	2	7	16	5	22	45	9
2015-01	microbiology	2	20		12	8	8	193	28	21	22	0	27	71	0	213	88	160	16	20	16	71	1	1	2	7	16	5	22	45	9
2015-01	molecular biology	4	20		12	8	8	193	28	21	22	0	27	71	0	213	88	160	16	20	20	71	1	1	2	7	16	5	22	45	9
2015-01	neuroscience	13	84		12	8	8	193	28	21	22	0	27	71	0	213	88	160	16	20	20	84	1	1	2	7	16	5	22	45	9
2015-01	physiology	1	8		12	8	8	193	28	21	22	0	27	71	0	213	88	160	16	20	20	84	1	1	2	8	16	5	22	45	9
2015-01	plant biology	2	18		12	8	8	193	28	21	22	0	27	71	0	213	88	160	16	20	20	84	1	1	2	8	18	5	22	45	9
2015-01	synthetic biology	2	24		12	8	8	193	28	21	22	0	27	71	0	213	88	160	16	20	20	84	1	1	2	8	18	5	24	45	9
2015-01	systems biology	5	50		12	8	8	193	28	21	22	0	27	71	0	213	88	160	16	20	20	84	1	1	2	8	18	5	24	50	9
2015-02	biochemistry	1	9		12	9	8	193	28	21	22	0	27	71	0	213	88	160	16	20	20	84	1	1	2	8	18	5	24	50	9
2015-02	bioengineering	2	10		12	9	10	193	28	21	22	0	27	71	0	213	88	160	16	20	20	84	1	1	2	8	18	5	24	50	9
2015-02	bioinformatics	18	211		12	9	10	211	28	21	22	0	27	71	0	213	88	160	16	20	20	84	1	1	2	8	18	5	24	50	9
2015-02	biophysics	2	30		12	9	10	211	30	21	22	0	27	71	0	213	88	160	16	20	20	84	1	1	2	8	18	5	24	50	9
2015-02	cancer biology	1	22		12	9	10	211	30	22	22	0	27	71	0	213	88	160	16	20	20	84	1	1	2	8	18	5	24	50	9
2015-02	developmental biology	1	28		12	9	10	211	30	22	22	0	28	71	0	213	88	160	16	20	20	84	1	1	2	8	18	5	24	50	9
2015-02	ecology	4	75		12	9	10	211	30	22	22	0	28	75	0	213	88	160	16	20	20	84	1	1	2	8	18	5	24	50	9
2015-02	evolutionary biology	15	228		12	9	10	211	30	22	22	0	28	75	0	228	88	160	16	20	20	84	1	1	2	8	18	5	24	50	9
2015-02	genetics	11	99		12	9	10	211	30	22	22	0	28	75	0	228	99	160	16	20	20	84	1	1	2	8	18	5	24	50	9
2015-02	genomics	13	173		12	9	10	211	30	22	22	0	28	75	0	228	99	173	16	20	20	84	1	1	2	8	18	5	24	50	9
2015-02	immunology	2	18		12	9	10	211	30	22	22	0	28	75	0	228	99	173	18	20	20	84	1	1	2	8	18	5	24	50	9
2015-02	neuroscience	8	92		12	9	10	211	30	22	22	0	28	75	0	228	99	173	18	20	20	92	1	1	2	8	18	5	24	50	9
2015-02	paleontology	1	2		12	9	10	211	30	22	22	0	28	75	0	228	99	173	18	20	20	92	2	1	2	8	18	5	24	50	9
2015-02	plant biology	4	22		12	9	10	211	30	22	22	0	28	75	0	228	99	173	18	20	20	92	2	1	2	8	22	5	24	50	9
2015-02	synthetic biology	1	25		12	9	10	211	30	22	22	0	28	75	0	228	99	173	18	20	20	92	2	1	2	8	22	5	25	50	9
2015-02	systems biology	4	54		12	9	10	211	30	22	22	0	28	75	0	228	99	173	18	20	20	92	2	1	2	8	22	5	25	54	9
2015-03	biochemistry	1	10		12	10	10	211	30	22	22	0	28	75	0	228	99	173	18	20	20	92	2	1	2	8	22	5	25	54	9
2015-03	bioinformatics	18	229		12	10	10	229	30	22	22	0	28	75	0	228	99	173	18	20	20	92	2	1	2	8	22	5	25	54	9
2015-03	biophysics	3	33		12	10	10	229	33	22	22	0	28	75	0	228	99	173	18	20	20	92	2	1	2	8	22	5	25	54	9
2015-03	cancer biology	4	26		12	10	10	229	33	26	22	0	28	75	0	228	99	173	18	20	20	92	2	1	2	8	22	5	25	54	9
2015-03	cell biology	1	23		12	10	10	229	33	26	23	0	28	75	0	228	99	173	18	20	20	92	2	1	2	8	22	5	25	54	9
2015-03	developmental biology	8	36		12	10	10	229	33	26	23	0	36	75	0	228	99	173	18	20	20	92	2	1	2	8	22	5	25	54	9
2015-03	ecology	4	79		12	10	10	229	33	26	23	0	36	79	0	228	99	173	18	20	20	92	2	1	2	8	22	5	25	54	9
2015-03	evolutionary biology	24	252		12	10	10	229	33	26	23	0	36	79	0	252	99	173	18	20	20	92	2	1	2	8	22	5	25	54	9
2015-03	genetics	15	114		12	10	10	229	33	26	23	0	36	79	0	252	114	173	18	20	20	92	2	1	2	8	22	5	25	54	9
2015-03	genomics	14	187		12	10	10	229	33	26	23	0	36	79	0	252	114	187	18	20	20	92	2	1	2	8	22	5	25	54	9
2015-03	immunology	1	19		12	10	10	229	33	26	23	0	36	79	0	252	114	187	19	20	20	92	2	1	2	8	22	5	25	54	9
2015-03	microbiology	4	24		12	10	10	229	33	26	23	0	36	79	0	252	114	187	19	24	20	92	2	1	2	8	22	5	25	54	9
2015-03	molecular biology	3	23		12	10	10	229	33	26	23	0	36	79	0	252	114	187	19	24	23	92	2	1	2	8	22	5	25	54	9
2015-03	neuroscience	11	103		12	10	10	229	33	26	23	0	36	79	0	252	114	187	19	24	23	103	2	1	2	8	22	5	25	54	9
2015-03	paleontology	1	3		12	10	10	229	33	26	23	0	36	79	0	252	114	187	19	24	23	103	3	1	2	8	22	5	25	54	9
2015-03	plant biology	3	25		12	10	10	229	33	26	23	0	36	79	0	252	114	187	19	24	23	103	3	1	2	8	25	5	25	54	9
2015-03	synthetic biology	2	27		12	10	10	229	33	26	23	0	36	79	0	252	114	187	19	24	23	103	3	1	2	8	25	5	27	54	9
2015-03	systems biology	3	57		12	10	10	229	33	26	23	0	36	79	0	252	114	187	19	24	23	103	3	1	2	8	25	5	27	57	9
2015-04	animal behavior and cognition	3	15		15	10	10	229	33	26	23	0	36	79	0	252	114	187	19	24	23	103	3	1	2	8	25	5	27	57	9
2015-04	biochemistry	1	11		15	11	10	229	33	26	23	0	36	79	0	252	114	187	19	24	23	103	3	1	2	8	25	5	27	57	9
2015-04	bioengineering	3	13		15	11	13	229	33	26	23	0	36	79	0	252	114	187	19	24	23	103	3	1	2	8	25	5	27	57	9
2015-04	bioinformatics	24	253		15	11	13	253	33	26	23	0	36	79	0	252	114	187	19	24	23	103	3	1	2	8	25	5	27	57	9
2015-04	biophysics	2	35		15	11	13	253	35	26	23	0	36	79	0	252	114	187	19	24	23	103	3	1	2	8	25	5	27	57	9
2015-04	cancer biology	2	28		15	11	13	253	35	28	23	0	36	79	0	252	114	187	19	24	23	103	3	1	2	8	25	5	27	57	9
2015-04	developmental biology	1	37		15	11	13	253	35	28	23	0	37	79	0	252	114	187	19	24	23	103	3	1	2	8	25	5	27	57	9
2015-04	ecology	7	86		15	11	13	253	35	28	23	0	37	86	0	252	114	187	19	24	23	103	3	1	2	8	25	5	27	57	9
2015-04	evolutionary biology	23	275		15	11	13	253	35	28	23	0	37	86	0	275	114	187	19	24	23	103	3	1	2	8	25	5	27	57	9
2015-04	genetics	11	125		15	11	13	253	35	28	23	0	37	86	0	275	125	187	19	24	23	103	3	1	2	8	25	5	27	57	9
2015-04	genomics	18	205		15	11	13	253	35	28	23	0	37	86	0	275	125	205	19	24	23	103	3	1	2	8	25	5	27	57	9
2015-04	microbiology	3	27		15	11	13	253	35	28	23	0	37	86	0	275	125	205	19	27	23	103	3	1	2	8	25	5	27	57	9
2015-04	molecular biology	1	24		15	11	13	253	35	28	23	0	37	86	0	275	125	205	19	27	24	103	3	1	2	8	25	5	27	57	9
2015-04	neuroscience	9	112		15	11	13	253	35	28	23	0	37	86	0	275	125	205	19	27	24	112	3	1	2	8	25	5	27	57	9
2015-04	pathology	2	3		15	11	13	253	35	28	23	0	37	86	0	275	125	205	19	27	24	112	3	3	2	8	25	5	27	57	9
2015-04	pharmacology and toxicology	1	3		15	11	13	253	35	28	23	0	37	86	0	275	125	205	19	27	24	112	3	3	3	8	25	5	27	57	9
2015-04	plant biology	1	26		15	11	13	253	35	28	23	0	37	86	0	275	125	205	19	27	24	112	3	3	3	8	26	5	27	57	9
2015-04	scientific communication and education	1	6		15	11	13	253	35	28	23	0	37	86	0	275	125	205	19	27	24	112	3	3	3	8	26	6	27	57	9
2015-04	synthetic biology	3	30		15	11	13	253	35	28	23	0	37	86	0	275	125	205	19	27	24	112	3	3	3	8	26	6	30	57	9
2015-04	systems biology	2	59		15	11	13	253	35	28	23	0	37	86	0	275	125	205	19	27	24	112	3	3	3	8	26	6	30	59	9
2015-04	zoology	1	10		15	11	13	253	35	28	23	0	37	86	0	275	125	205	19	27	24	112	3	3	3	8	26	6	30	59	10
2015-05	biochemistry	1	12		15	12	13	253	35	28	23	0	37	86	0	275	125	205	19	27	24	112	3	3	3	8	26	6	30	59	10
2015-05	bioengineering	2	15		15	12	15	253	35	28	23	0	37	86	0	275	125	205	19	27	24	112	3	3	3	8	26	6	30	59	10
2015-05	bioinformatics	20	273		15	12	15	273	35	28	23	0	37	86	0	275	125	205	19	27	24	112	3	3	3	8	26	6	30	59	10
2015-05	biophysics	4	39		15	12	15	273	39	28	23	0	37	86	0	275	125	205	19	27	24	112	3	3	3	8	26	6	30	59	10
2015-05	cancer biology	3	31		15	12	15	273	39	31	23	0	37	86	0	275	125	205	19	27	24	112	3	3	3	8	26	6	30	59	10
2015-05	cell biology	1	24		15	12	15	273	39	31	24	0	37	86	0	275	125	205	19	27	24	112	3	3	3	8	26	6	30	59	10
2015-05	ecology	8	94		15	12	15	273	39	31	24	0	37	94	0	275	125	205	19	27	24	112	3	3	3	8	26	6	30	59	10
2015-05	evolutionary biology	22	297		15	12	15	273	39	31	24	0	37	94	0	297	125	205	19	27	24	112	3	3	3	8	26	6	30	59	10
2015-05	genetics	10	135		15	12	15	273	39	31	24	0	37	94	0	297	135	205	19	27	24	112	3	3	3	8	26	6	30	59	10
2015-05	genomics	16	221		15	12	15	273	39	31	24	0	37	94	0	297	135	221	19	27	24	112	3	3	3	8	26	6	30	59	10
2015-05	immunology	1	20		15	12	15	273	39	31	24	0	37	94	0	297	135	221	20	27	24	112	3	3	3	8	26	6	30	59	10
2015-05	microbiology	6	33		15	12	15	273	39	31	24	0	37	94	0	297	135	221	20	33	24	112	3	3	3	8	26	6	30	59	10
2015-05	neuroscience	5	117		15	12	15	273	39	31	24	0	37	94	0	297	135	221	20	33	24	117	3	3	3	8	26	6	30	59	10
2015-05	plant biology	4	30		15	12	15	273	39	31	24	0	37	94	0	297	135	221	20	33	24	117	3	3	3	8	30	6	30	59	10
2015-05	synthetic biology	4	34		15	12	15	273	39	31	24	0	37	94	0	297	135	221	20	33	24	117	3	3	3	8	30	6	34	59	10
2015-05	systems biology	4	63		15	12	15	273	39	31	24	0	37	94	0	297	135	221	20	33	24	117	3	3	3	8	30	6	34	63	10
2015-05	zoology	1	11		15	12	15	273	39	31	24	0	37	94	0	297	135	221	20	33	24	117	3	3	3	8	30	6	34	63	11
2015-06	animal behavior and cognition	2	17		17	12	15	273	39	31	24	0	37	94	0	297	135	221	20	33	24	117	3	3	3	8	30	6	34	63	11
2015-06	biochemistry	1	13		17	13	15	273	39	31	24	0	37	94	0	297	135	221	20	33	24	117	3	3	3	8	30	6	34	63	11
2015-06	bioengineering	1	16		17	13	16	273	39	31	24	0	37	94	0	297	135	221	20	33	24	117	3	3	3	8	30	6	34	63	11
2015-06	bioinformatics	33	306		17	13	16	306	39	31	24	0	37	94	0	297	135	221	20	33	24	117	3	3	3	8	30	6	34	63	11
2015-06	biophysics	4	43		17	13	16	306	43	31	24	0	37	94	0	297	135	221	20	33	24	117	3	3	3	8	30	6	34	63	11
2015-06	cancer biology	4	35		17	13	16	306	43	35	24	0	37	94	0	297	135	221	20	33	24	117	3	3	3	8	30	6	34	63	11
2015-06	cell biology	3	27		17	13	16	306	43	35	27	0	37	94	0	297	135	221	20	33	24	117	3	3	3	8	30	6	34	63	11
2015-06	ecology	5	99		17	13	16	306	43	35	27	0	37	99	0	297	135	221	20	33	24	117	3	3	3	8	30	6	34	63	11
2015-06	evolutionary biology	18	315		17	13	16	306	43	35	27	0	37	99	0	315	135	221	20	33	24	117	3	3	3	8	30	6	34	63	11
2015-06	genetics	13	148		17	13	16	306	43	35	27	0	37	99	0	315	148	221	20	33	24	117	3	3	3	8	30	6	34	63	11
2015-06	genomics	17	238		17	13	16	306	43	35	27	0	37	99	0	315	148	238	20	33	24	117	3	3	3	8	30	6	34	63	11
2015-06	immunology	1	21		17	13	16	306	43	35	27	0	37	99	0	315	148	238	21	33	24	117	3	3	3	8	30	6	34	63	11
2015-06	microbiology	4	37		17	13	16	306	43	35	27	0	37	99	0	315	148	238	21	37	24	117	3	3	3	8	30	6	34	63	11
2015-06	molecular biology	2	26		17	13	16	306	43	35	27	0	37	99	0	315	148	238	21	37	26	117	3	3	3	8	30	6	34	63	11
2015-06	neuroscience	9	126		17	13	16	306	43	35	27	0	37	99	0	315	148	238	21	37	26	126	3	3	3	8	30	6	34	63	11
2015-06	pathology	1	4		17	13	16	306	43	35	27	0	37	99	0	315	148	238	21	37	26	126	3	4	3	8	30	6	34	63	11
2015-06	pharmacology and toxicology	2	5		17	13	16	306	43	35	27	0	37	99	0	315	148	238	21	37	26	126	3	4	5	8	30	6	34	63	11
2015-06	scientific communication and education	1	7		17	13	16	306	43	35	27	0	37	99	0	315	148	238	21	37	26	126	3	4	5	8	30	7	34	63	11
2015-06	synthetic biology	3	37		17	13	16	306	43	35	27	0	37	99	0	315	148	238	21	37	26	126	3	4	5	8	30	7	37	63	11
2015-06	systems biology	4	67		17	13	16	306	43	35	27	0	37	99	0	315	148	238	21	37	26	126	3	4	5	8	30	7	37	67	11
2015-07	biochemistry	2	15		17	15	16	306	43	35	27	0	37	99	0	315	148	238	21	37	26	126	3	4	5	8	30	7	37	67	11
2015-07	bioengineering	7	23		17	15	23	306	43	35	27	0	37	99	0	315	148	238	21	37	26	126	3	4	5	8	30	7	37	67	11
2015-07	bioinformatics	26	332		17	15	23	332	43	35	27	0	37	99	0	315	148	238	21	37	26	126	3	4	5	8	30	7	37	67	11
2015-07	biophysics	1	44		17	15	23	332	44	35	27	0	37	99	0	315	148	238	21	37	26	126	3	4	5	8	30	7	37	67	11
2015-07	cancer biology	3	38		17	15	23	332	44	38	27	0	37	99	0	315	148	238	21	37	26	126	3	4	5	8	30	7	37	67	11
2015-07	cell biology	1	28		17	15	23	332	44	38	28	0	37	99	0	315	148	238	21	37	26	126	3	4	5	8	30	7	37	67	11
2015-07	developmental biology	5	42		17	15	23	332	44	38	28	0	42	99	0	315	148	238	21	37	26	126	3	4	5	8	30	7	37	67	11
2015-07	ecology	6	105		17	15	23	332	44	38	28	0	42	105	0	315	148	238	21	37	26	126	3	4	5	8	30	7	37	67	11
2015-07	evolutionary biology	43	358		17	15	23	332	44	38	28	0	42	105	0	358	148	238	21	37	26	126	3	4	5	8	30	7	37	67	11
2015-07	genetics	17	165		17	15	23	332	44	38	28	0	42	105	0	358	165	238	21	37	26	126	3	4	5	8	30	7	37	67	11
2015-07	genomics	18	256		17	15	23	332	44	38	28	0	42	105	0	358	165	256	21	37	26	126	3	4	5	8	30	7	37	67	11
2015-07	immunology	1	22		17	15	23	332	44	38	28	0	42	105	0	358	165	256	22	37	26	126	3	4	5	8	30	7	37	67	11
2015-07	microbiology	6	43		17	15	23	332	44	38	28	0	42	105	0	358	165	256	22	43	26	126	3	4	5	8	30	7	37	67	11
2015-07	neuroscience	11	137		17	15	23	332	44	38	28	0	42	105	0	358	165	256	22	43	26	137	3	4	5	8	30	7	37	67	11
2015-07	plant biology	3	33		17	15	23	332	44	38	28	0	42	105	0	358	165	256	22	43	26	137	3	4	5	8	33	7	37	67	11
2015-07	scientific communication and education	2	9		17	15	23	332	44	38	28	0	42	105	0	358	165	256	22	43	26	137	3	4	5	8	33	9	37	67	11
2015-07	synthetic biology	1	38		17	15	23	332	44	38	28	0	42	105	0	358	165	256	22	43	26	137	3	4	5	8	33	9	38	67	11
2015-07	systems biology	5	72		17	15	23	332	44	38	28	0	42	105	0	358	165	256	22	43	26	137	3	4	5	8	33	9	38	72	11
2015-07	zoology	1	12		17	15	23	332	44	38	28	0	42	105	0	358	165	256	22	43	26	137	3	4	5	8	33	9	38	72	12
2015-08	animal behavior and cognition	2	19		19	15	23	332	44	38	28	0	42	105	0	358	165	256	22	43	26	137	3	4	5	8	33	9	38	72	12
2015-08	biochemistry	2	17		19	17	23	332	44	38	28	0	42	105	0	358	165	256	22	43	26	137	3	4	5	8	33	9	38	72	12
2015-08	bioengineering	4	27		19	17	27	332	44	38	28	0	42	105	0	358	165	256	22	43	26	137	3	4	5	8	33	9	38	72	12
2015-08	bioinformatics	24	356		19	17	27	356	44	38	28	0	42	105	0	358	165	256	22	43	26	137	3	4	5	8	33	9	38	72	12
2015-08	biophysics	3	47		19	17	27	356	47	38	28	0	42	105	0	358	165	256	22	43	26	137	3	4	5	8	33	9	38	72	12
2015-08	cancer biology	6	44		19	17	27	356	47	44	28	0	42	105	0	358	165	256	22	43	26	137	3	4	5	8	33	9	38	72	12
2015-08	cell biology	3	31		19	17	27	356	47	44	31	0	42	105	0	358	165	256	22	43	26	137	3	4	5	8	33	9	38	72	12
2015-08	developmental biology	2	44		19	17	27	356	47	44	31	0	44	105	0	358	165	256	22	43	26	137	3	4	5	8	33	9	38	72	12
2015-08	ecology	10	115		19	17	27	356	47	44	31	0	44	115	0	358	165	256	22	43	26	137	3	4	5	8	33	9	38	72	12
2015-08	evolutionary biology	25	383		19	17	27	356	47	44	31	0	44	115	0	383	165	256	22	43	26	137	3	4	5	8	33	9	38	72	12
2015-08	genetics	20	185		19	17	27	356	47	44	31	0	44	115	0	383	185	256	22	43	26	137	3	4	5	8	33	9	38	72	12
2015-08	genomics	26	282		19	17	27	356	47	44	31	0	44	115	0	383	185	282	22	43	26	137	3	4	5	8	33	9	38	72	12
2015-08	immunology	1	23		19	17	27	356	47	44	31	0	44	115	0	383	185	282	23	43	26	137	3	4	5	8	33	9	38	72	12
2015-08	microbiology	3	46		19	17	27	356	47	44	31	0	44	115	0	383	185	282	23	46	26	137	3	4	5	8	33	9	38	72	12
2015-08	molecular biology	3	29		19	17	27	356	47	44	31	0	44	115	0	383	185	282	23	46	29	137	3	4	5	8	33	9	38	72	12
2015-08	neuroscience	10	147		19	17	27	356	47	44	31	0	44	115	0	383	185	282	23	46	29	147	3	4	5	8	33	9	38	72	12
2015-08	plant biology	3	36		19	17	27	356	47	44	31	0	44	115	0	383	185	282	23	46	29	147	3	4	5	8	36	9	38	72	12
2015-08	scientific communication and education	1	10		19	17	27	356	47	44	31	0	44	115	0	383	185	282	23	46	29	147	3	4	5	8	36	10	38	72	12
2015-08	synthetic biology	4	42		19	17	27	356	47	44	31	0	44	115	0	383	185	282	23	46	29	147	3	4	5	8	36	10	42	72	12
2015-08	systems biology	6	78		19	17	27	356	47	44	31	0	44	115	0	383	185	282	23	46	29	147	3	4	5	8	36	10	42	78	12
2015-08	zoology	1	13		19	17	27	356	47	44	31	0	44	115	0	383	185	282	23	46	29	147	3	4	5	8	36	10	42	78	13
2015-09	animal behavior and cognition	3	22		22	17	27	356	47	44	31	0	44	115	0	383	185	282	23	46	29	147	3	4	5	8	36	10	42	78	13
2015-09	biochemistry	2	19		22	19	27	356	47	44	31	0	44	115	0	383	185	282	23	46	29	147	3	4	5	8	36	10	42	78	13
2015-09	bioengineering	1	28		22	19	28	356	47	44	31	0	44	115	0	383	185	282	23	46	29	147	3	4	5	8	36	10	42	78	13
2015-09	bioinformatics	25	381		22	19	28	381	47	44	31	0	44	115	0	383	185	282	23	46	29	147	3	4	5	8	36	10	42	78	13
2015-09	biophysics	3	50		22	19	28	381	50	44	31	0	44	115	0	383	185	282	23	46	29	147	3	4	5	8	36	10	42	78	13
2015-09	cancer biology	4	48		22	19	28	381	50	48	31	0	44	115	0	383	185	282	23	46	29	147	3	4	5	8	36	10	42	78	13
2015-09	cell biology	1	32		22	19	28	381	50	48	32	0	44	115	0	383	185	282	23	46	29	147	3	4	5	8	36	10	42	78	13
2015-09	developmental biology	2	46		22	19	28	381	50	48	32	0	46	115	0	383	185	282	23	46	29	147	3	4	5	8	36	10	42	78	13
2015-09	ecology	12	127		22	19	28	381	50	48	32	0	46	127	0	383	185	282	23	46	29	147	3	4	5	8	36	10	42	78	13
2015-09	evolutionary biology	39	422		22	19	28	381	50	48	32	0	46	127	0	422	185	282	23	46	29	147	3	4	5	8	36	10	42	78	13
2015-09	genetics	12	197		22	19	28	381	50	48	32	0	46	127	0	422	197	282	23	46	29	147	3	4	5	8	36	10	42	78	13
2015-09	genomics	24	306		22	19	28	381	50	48	32	0	46	127	0	422	197	306	23	46	29	147	3	4	5	8	36	10	42	78	13
2015-09	immunology	2	25		22	19	28	381	50	48	32	0	46	127	0	422	197	306	25	46	29	147	3	4	5	8	36	10	42	78	13
2015-09	microbiology	4	50		22	19	28	381	50	48	32	0	46	127	0	422	197	306	25	50	29	147	3	4	5	8	36	10	42	78	13
2015-09	molecular biology	2	31		22	19	28	381	50	48	32	0	46	127	0	422	197	306	25	50	31	147	3	4	5	8	36	10	42	78	13
2015-09	neuroscience	15	162		22	19	28	381	50	48	32	0	46	127	0	422	197	306	25	50	31	162	3	4	5	8	36	10	42	78	13
2015-09	paleontology	1	4		22	19	28	381	50	48	32	0	46	127	0	422	197	306	25	50	31	162	4	4	5	8	36	10	42	78	13
2015-09	physiology	2	10		22	19	28	381	50	48	32	0	46	127	0	422	197	306	25	50	31	162	4	4	5	10	36	10	42	78	13
2015-09	synthetic biology	2	44		22	19	28	381	50	48	32	0	46	127	0	422	197	306	25	50	31	162	4	4	5	10	36	10	44	78	13
2015-09	systems biology	5	83		22	19	28	381	50	48	32	0	46	127	0	422	197	306	25	50	31	162	4	4	5	10	36	10	44	83	13
2015-09	zoology	1	14		22	19	28	381	50	48	32	0	46	127	0	422	197	306	25	50	31	162	4	4	5	10	36	10	44	83	14
2015-10	animal behavior and cognition	3	25		25	19	28	381	50	48	32	0	46	127	0	422	197	306	25	50	31	162	4	4	5	10	36	10	44	83	14
2015-10	bioengineering	1	29		25	19	29	381	50	48	32	0	46	127	0	422	197	306	25	50	31	162	4	4	5	10	36	10	44	83	14
2015-10	bioinformatics	32	413		25	19	29	413	50	48	32	0	46	127	0	422	197	306	25	50	31	162	4	4	5	10	36	10	44	83	14
2015-10	biophysics	4	54		25	19	29	413	54	48	32	0	46	127	0	422	197	306	25	50	31	162	4	4	5	10	36	10	44	83	14
2015-10	cancer biology	6	54		25	19	29	413	54	54	32	0	46	127	0	422	197	306	25	50	31	162	4	4	5	10	36	10	44	83	14
2015-10	cell biology	4	36		25	19	29	413	54	54	36	0	46	127	0	422	197	306	25	50	31	162	4	4	5	10	36	10	44	83	14
2015-10	clinical trials	1	1		25	19	29	413	54	54	36	1	46	127	0	422	197	306	25	50	31	162	4	4	5	10	36	10	44	83	14
2015-10	developmental biology	1	47		25	19	29	413	54	54	36	1	47	127	0	422	197	306	25	50	31	162	4	4	5	10	36	10	44	83	14
2015-10	ecology	10	137		25	19	29	413	54	54	36	1	47	137	0	422	197	306	25	50	31	162	4	4	5	10	36	10	44	83	14
2015-10	evolutionary biology	31	453		25	19	29	413	54	54	36	1	47	137	0	453	197	306	25	50	31	162	4	4	5	10	36	10	44	83	14
2015-10	genetics	23	220		25	19	29	413	54	54	36	1	47	137	0	453	220	306	25	50	31	162	4	4	5	10	36	10	44	83	14
2015-10	genomics	21	327		25	19	29	413	54	54	36	1	47	137	0	453	220	327	25	50	31	162	4	4	5	10	36	10	44	83	14
2015-10	immunology	1	26		25	19	29	413	54	54	36	1	47	137	0	453	220	327	26	50	31	162	4	4	5	10	36	10	44	83	14
2015-10	microbiology	7	57		25	19	29	413	54	54	36	1	47	137	0	453	220	327	26	57	31	162	4	4	5	10	36	10	44	83	14
2015-10	molecular biology	2	33		25	19	29	413	54	54	36	1	47	137	0	453	220	327	26	57	33	162	4	4	5	10	36	10	44	83	14
2015-10	neuroscience	21	183		25	19	29	413	54	54	36	1	47	137	0	453	220	327	26	57	33	183	4	4	5	10	36	10	44	83	14
2015-10	pathology	1	5		25	19	29	413	54	54	36	1	47	137	0	453	220	327	26	57	33	183	4	5	5	10	36	10	44	83	14
2015-10	pharmacology and toxicology	2	7		25	19	29	413	54	54	36	1	47	137	0	453	220	327	26	57	33	183	4	5	7	10	36	10	44	83	14
2015-10	physiology	2	12		25	19	29	413	54	54	36	1	47	137	0	453	220	327	26	57	33	183	4	5	7	12	36	10	44	83	14
2015-10	plant biology	2	38		25	19	29	413	54	54	36	1	47	137	0	453	220	327	26	57	33	183	4	5	7	12	38	10	44	83	14
2015-10	scientific communication and education	1	11		25	19	29	413	54	54	36	1	47	137	0	453	220	327	26	57	33	183	4	5	7	12	38	11	44	83	14
2015-10	synthetic biology	2	46		25	19	29	413	54	54	36	1	47	137	0	453	220	327	26	57	33	183	4	5	7	12	38	11	46	83	14
2015-10	systems biology	11	94		25	19	29	413	54	54	36	1	47	137	0	453	220	327	26	57	33	183	4	5	7	12	38	11	46	94	14
2015-10	zoology	2	16		25	19	29	413	54	54	36	1	47	137	0	453	220	327	26	57	33	183	4	5	7	12	38	11	46	94	16
2015-11	animal behavior and cognition	2	27		27	19	29	413	54	54	36	1	47	137	0	453	220	327	26	57	33	183	4	5	7	12	38	11	46	94	16
2015-11	biochemistry	4	23		27	23	29	413	54	54	36	1	47	137	0	453	220	327	26	57	33	183	4	5	7	12	38	11	46	94	16
2015-11	bioinformatics	39	452		27	23	29	452	54	54	36	1	47	137	0	453	220	327	26	57	33	183	4	5	7	12	38	11	46	94	16
2015-11	biophysics	6	60		27	23	29	452	60	54	36	1	47	137	0	453	220	327	26	57	33	183	4	5	7	12	38	11	46	94	16
2015-11	cancer biology	5	59		27	23	29	452	60	59	36	1	47	137	0	453	220	327	26	57	33	183	4	5	7	12	38	11	46	94	16
2015-11	cell biology	2	38		27	23	29	452	60	59	38	1	47	137	0	453	220	327	26	57	33	183	4	5	7	12	38	11	46	94	16
2015-11	developmental biology	9	56		27	23	29	452	60	59	38	1	56	137	0	453	220	327	26	57	33	183	4	5	7	12	38	11	46	94	16
2015-11	ecology	10	147		27	23	29	452	60	59	38	1	56	147	0	453	220	327	26	57	33	183	4	5	7	12	38	11	46	94	16
2015-11	evolutionary biology	34	487		27	23	29	452	60	59	38	1	56	147	0	487	220	327	26	57	33	183	4	5	7	12	38	11	46	94	16
2015-11	genetics	29	249		27	23	29	452	60	59	38	1	56	147	0	487	249	327	26	57	33	183	4	5	7	12	38	11	46	94	16
2015-11	genomics	31	358		27	23	29	452	60	59	38	1	56	147	0	487	249	358	26	57	33	183	4	5	7	12	38	11	46	94	16
2015-11	immunology	2	28		27	23	29	452	60	59	38	1	56	147	0	487	249	358	28	57	33	183	4	5	7	12	38	11	46	94	16
2015-11	microbiology	12	69		27	23	29	452	60	59	38	1	56	147	0	487	249	358	28	69	33	183	4	5	7	12	38	11	46	94	16
2015-11	molecular biology	2	35		27	23	29	452	60	59	38	1	56	147	0	487	249	358	28	69	35	183	4	5	7	12	38	11	46	94	16
2015-11	neuroscience	16	199		27	23	29	452	60	59	38	1	56	147	0	487	249	358	28	69	35	199	4	5	7	12	38	11	46	94	16
2015-11	pathology	1	6		27	23	29	452	60	59	38	1	56	147	0	487	249	358	28	69	35	199	4	6	7	12	38	11	46	94	16
2015-11	physiology	3	15		27	23	29	452	60	59	38	1	56	147	0	487	249	358	28	69	35	199	4	6	7	15	38	11	46	94	16
2015-11	plant biology	7	45		27	23	29	452	60	59	38	1	56	147	0	487	249	358	28	69	35	199	4	6	7	15	45	11	46	94	16
2015-11	scientific communication and education	1	12		27	23	29	452	60	59	38	1	56	147	0	487	249	358	28	69	35	199	4	6	7	15	45	12	46	94	16
2015-11	synthetic biology	1	47		27	23	29	452	60	59	38	1	56	147	0	487	249	358	28	69	35	199	4	6	7	15	45	12	47	94	16
2015-11	systems biology	9	103		27	23	29	452	60	59	38	1	56	147	0	487	249	358	28	69	35	199	4	6	7	15	45	12	47	103	16
2015-11	zoology	2	18		27	23	29	452	60	59	38	1	56	147	0	487	249	358	28	69	35	199	4	6	7	15	45	12	47	103	18
2015-12	animal behavior and cognition	3	30		30	23	29	452	60	59	38	1	56	147	0	487	249	358	28	69	35	199	4	6	7	15	45	12	47	103	18
2015-12	biochemistry	4	27		30	27	29	452	60	59	38	1	56	147	0	487	249	358	28	69	35	199	4	6	7	15	45	12	47	103	18
2015-12	bioinformatics	34	486		30	27	29	486	60	59	38	1	56	147	0	487	249	358	28	69	35	199	4	6	7	15	45	12	47	103	18
2015-12	biophysics	2	62		30	27	29	486	62	59	38	1	56	147	0	487	249	358	28	69	35	199	4	6	7	15	45	12	47	103	18
2015-12	cancer biology	6	65		30	27	29	486	62	65	38	1	56	147	0	487	249	358	28	69	35	199	4	6	7	15	45	12	47	103	18
2015-12	cell biology	2	40		30	27	29	486	62	65	40	1	56	147	0	487	249	358	28	69	35	199	4	6	7	15	45	12	47	103	18
2015-12	developmental biology	1	57		30	27	29	486	62	65	40	1	57	147	0	487	249	358	28	69	35	199	4	6	7	15	45	12	47	103	18
2015-12	ecology	13	160		30	27	29	486	62	65	40	1	57	160	0	487	249	358	28	69	35	199	4	6	7	15	45	12	47	103	18
2015-12	evolutionary biology	29	516		30	27	29	486	62	65	40	1	57	160	0	516	249	358	28	69	35	199	4	6	7	15	45	12	47	103	18
2015-12	genetics	20	269		30	27	29	486	62	65	40	1	57	160	0	516	269	358	28	69	35	199	4	6	7	15	45	12	47	103	18
2015-12	genomics	29	387		30	27	29	486	62	65	40	1	57	160	0	516	269	387	28	69	35	199	4	6	7	15	45	12	47	103	18
2015-12	immunology	1	29		30	27	29	486	62	65	40	1	57	160	0	516	269	387	29	69	35	199	4	6	7	15	45	12	47	103	18
2015-12	microbiology	7	76		30	27	29	486	62	65	40	1	57	160	0	516	269	387	29	76	35	199	4	6	7	15	45	12	47	103	18
2015-12	molecular biology	1	36		30	27	29	486	62	65	40	1	57	160	0	516	269	387	29	76	36	199	4	6	7	15	45	12	47	103	18
2015-12	neuroscience	18	217		30	27	29	486	62	65	40	1	57	160	0	516	269	387	29	76	36	217	4	6	7	15	45	12	47	103	18
2015-12	physiology	1	16		30	27	29	486	62	65	40	1	57	160	0	516	269	387	29	76	36	217	4	6	7	16	45	12	47	103	18
2015-12	plant biology	5	50		30	27	29	486	62	65	40	1	57	160	0	516	269	387	29	76	36	217	4	6	7	16	50	12	47	103	18
2015-12	scientific communication and education	1	13		30	27	29	486	62	65	40	1	57	160	0	516	269	387	29	76	36	217	4	6	7	16	50	13	47	103	18
2015-12	systems biology	14	117		30	27	29	486	62	65	40	1	57	160	0	516	269	387	29	76	36	217	4	6	7	16	50	13	47	117	18
2015-12	zoology	3	21		30	27	29	486	62	65	40	1	57	160	0	516	269	387	29	76	36	217	4	6	7	16	50	13	47	117	21
2016-01	animal behavior and cognition	4	34		34	27	29	486	62	65	40	1	57	160	0	516	269	387	29	76	36	217	4	6	7	16	50	13	47	117	21
2016-01	biochemistry	1	28		34	28	29	486	62	65	40	1	57	160	0	516	269	387	29	76	36	217	4	6	7	16	50	13	47	117	21
2016-01	bioengineering	5	34		34	28	34	486	62	65	40	1	57	160	0	516	269	387	29	76	36	217	4	6	7	16	50	13	47	117	21
2016-01	bioinformatics	38	524		34	28	34	524	62	65	40	1	57	160	0	516	269	387	29	76	36	217	4	6	7	16	50	13	47	117	21
2016-01	biophysics	8	70		34	28	34	524	70	65	40	1	57	160	0	516	269	387	29	76	36	217	4	6	7	16	50	13	47	117	21
2016-01	cancer biology	6	71		34	28	34	524	70	71	40	1	57	160	0	516	269	387	29	76	36	217	4	6	7	16	50	13	47	117	21
2016-01	cell biology	4	44		34	28	34	524	70	71	44	1	57	160	0	516	269	387	29	76	36	217	4	6	7	16	50	13	47	117	21
2016-01	developmental biology	3	60		34	28	34	524	70	71	44	1	60	160	0	516	269	387	29	76	36	217	4	6	7	16	50	13	47	117	21
2016-01	ecology	4	164		34	28	34	524	70	71	44	1	60	164	0	516	269	387	29	76	36	217	4	6	7	16	50	13	47	117	21
2016-01	evolutionary biology	25	541		34	28	34	524	70	71	44	1	60	164	0	541	269	387	29	76	36	217	4	6	7	16	50	13	47	117	21
2016-01	genetics	17	286		34	28	34	524	70	71	44	1	60	164	0	541	286	387	29	76	36	217	4	6	7	16	50	13	47	117	21
2016-01	genomics	27	414		34	28	34	524	70	71	44	1	60	164	0	541	286	414	29	76	36	217	4	6	7	16	50	13	47	117	21
2016-01	immunology	1	30		34	28	34	524	70	71	44	1	60	164	0	541	286	414	30	76	36	217	4	6	7	16	50	13	47	117	21
2016-01	microbiology	4	80		34	28	34	524	70	71	44	1	60	164	0	541	286	414	30	80	36	217	4	6	7	16	50	13	47	117	21
2016-01	molecular biology	2	38		34	28	34	524	70	71	44	1	60	164	0	541	286	414	30	80	38	217	4	6	7	16	50	13	47	117	21
2016-01	neuroscience	24	241		34	28	34	524	70	71	44	1	60	164	0	541	286	414	30	80	38	241	4	6	7	16	50	13	47	117	21
2016-01	pathology	2	8		34	28	34	524	70	71	44	1	60	164	0	541	286	414	30	80	38	241	4	8	7	16	50	13	47	117	21
2016-01	physiology	1	17		34	28	34	524	70	71	44	1	60	164	0	541	286	414	30	80	38	241	4	8	7	17	50	13	47	117	21
2016-01	plant biology	8	58		34	28	34	524	70	71	44	1	60	164	0	541	286	414	30	80	38	241	4	8	7	17	58	13	47	117	21
2016-01	scientific communication and education	1	14		34	28	34	524	70	71	44	1	60	164	0	541	286	414	30	80	38	241	4	8	7	17	58	14	47	117	21
2016-01	synthetic biology	2	49		34	28	34	524	70	71	44	1	60	164	0	541	286	414	30	80	38	241	4	8	7	17	58	14	49	117	21
2016-01	systems biology	13	130		34	28	34	524	70	71	44	1	60	164	0	541	286	414	30	80	38	241	4	8	7	17	58	14	49	130	21
2016-01	zoology	2	23		34	28	34	524	70	71	44	1	60	164	0	541	286	414	30	80	38	241	4	8	7	17	58	14	49	130	23
2016-02	animal behavior and cognition	4	38		38	28	34	524	70	71	44	1	60	164	0	541	286	414	30	80	38	241	4	8	7	17	58	14	49	130	23
2016-02	biochemistry	6	34		38	34	34	524	70	71	44	1	60	164	0	541	286	414	30	80	38	241	4	8	7	17	58	14	49	130	23
2016-02	bioinformatics	40	564		38	34	34	564	70	71	44	1	60	164	0	541	286	414	30	80	38	241	4	8	7	17	58	14	49	130	23
2016-02	biophysics	6	76		38	34	34	564	76	71	44	1	60	164	0	541	286	414	30	80	38	241	4	8	7	17	58	14	49	130	23
2016-02	cancer biology	5	76		38	34	34	564	76	76	44	1	60	164	0	541	286	414	30	80	38	241	4	8	7	17	58	14	49	130	23
2016-02	cell biology	10	54		38	34	34	564	76	76	54	1	60	164	0	541	286	414	30	80	38	241	4	8	7	17	58	14	49	130	23
2016-02	developmental biology	6	66		38	34	34	564	76	76	54	1	66	164	0	541	286	414	30	80	38	241	4	8	7	17	58	14	49	130	23
2016-02	ecology	22	186		38	34	34	564	76	76	54	1	66	186	0	541	286	414	30	80	38	241	4	8	7	17	58	14	49	130	23
2016-02	evolutionary biology	36	577		38	34	34	564	76	76	54	1	66	186	0	577	286	414	30	80	38	241	4	8	7	17	58	14	49	130	23
2016-02	genetics	26	312		38	34	34	564	76	76	54	1	66	186	0	577	312	414	30	80	38	241	4	8	7	17	58	14	49	130	23
2016-02	genomics	39	453		38	34	34	564	76	76	54	1	66	186	0	577	312	453	30	80	38	241	4	8	7	17	58	14	49	130	23
2016-02	immunology	3	33		38	34	34	564	76	76	54	1	66	186	0	577	312	453	33	80	38	241	4	8	7	17	58	14	49	130	23
2016-02	microbiology	15	95		38	34	34	564	76	76	54	1	66	186	0	577	312	453	33	95	38	241	4	8	7	17	58	14	49	130	23
2016-02	molecular biology	3	41		38	34	34	564	76	76	54	1	66	186	0	577	312	453	33	95	41	241	4	8	7	17	58	14	49	130	23
2016-02	neuroscience	26	267		38	34	34	564	76	76	54	1	66	186	0	577	312	453	33	95	41	267	4	8	7	17	58	14	49	130	23
2016-02	pharmacology and toxicology	1	8		38	34	34	564	76	76	54	1	66	186	0	577	312	453	33	95	41	267	4	8	8	17	58	14	49	130	23
2016-02	plant biology	8	66		38	34	34	564	76	76	54	1	66	186	0	577	312	453	33	95	41	267	4	8	8	17	66	14	49	130	23
2016-02	scientific communication and education	2	16		38	34	34	564	76	76	54	1	66	186	0	577	312	453	33	95	41	267	4	8	8	17	66	16	49	130	23
2016-02	systems biology	13	143		38	34	34	564	76	76	54	1	66	186	0	577	312	453	33	95	41	267	4	8	8	17	66	16	49	143	23
2016-03	animal behavior and cognition	2	40		40	34	34	564	76	76	54	1	66	186	0	577	312	453	33	95	41	267	4	8	8	17	66	16	49	143	23
2016-03	biochemistry	6	40		40	40	34	564	76	76	54	1	66	186	0	577	312	453	33	95	41	267	4	8	8	17	66	16	49	143	23
2016-03	bioengineering	7	41		40	40	41	564	76	76	54	1	66	186	0	577	312	453	33	95	41	267	4	8	8	17	66	16	49	143	23
2016-03	bioinformatics	53	617		40	40	41	617	76	76	54	1	66	186	0	577	312	453	33	95	41	267	4	8	8	17	66	16	49	143	23
2016-03	biophysics	9	85		40	40	41	617	85	76	54	1	66	186	0	577	312	453	33	95	41	267	4	8	8	17	66	16	49	143	23
2016-03	cancer biology	8	84		40	40	41	617	85	84	54	1	66	186	0	577	312	453	33	95	41	267	4	8	8	17	66	16	49	143	23
2016-03	cell biology	18	72		40	40	41	617	85	84	72	1	66	186	0	577	312	453	33	95	41	267	4	8	8	17	66	16	49	143	23
2016-03	developmental biology	6	72		40	40	41	617	85	84	72	1	72	186	0	577	312	453	33	95	41	267	4	8	8	17	66	16	49	143	23
2016-03	ecology	23	209		40	40	41	617	85	84	72	1	72	209	0	577	312	453	33	95	41	267	4	8	8	17	66	16	49	143	23
2016-03	evolutionary biology	52	629		40	40	41	617	85	84	72	1	72	209	0	629	312	453	33	95	41	267	4	8	8	17	66	16	49	143	23
2016-03	genetics	38	350		40	40	41	617	85	84	72	1	72	209	0	629	350	453	33	95	41	267	4	8	8	17	66	16	49	143	23
2016-03	genomics	37	490		40	40	41	617	85	84	72	1	72	209	0	629	350	490	33	95	41	267	4	8	8	17	66	16	49	143	23
2016-03	immunology	6	39		40	40	41	617	85	84	72	1	72	209	0	629	350	490	39	95	41	267	4	8	8	17	66	16	49	143	23
2016-03	microbiology	13	108		40	40	41	617	85	84	72	1	72	209	0	629	350	490	39	108	41	267	4	8	8	17	66	16	49	143	23
2016-03	molecular biology	5	46		40	40	41	617	85	84	72	1	72	209	0	629	350	490	39	108	46	267	4	8	8	17	66	16	49	143	23
2016-03	neuroscience	42	309		40	40	41	617	85	84	72	1	72	209	0	629	350	490	39	108	46	309	4	8	8	17	66	16	49	143	23
2016-03	paleontology	2	6		40	40	41	617	85	84	72	1	72	209	0	629	350	490	39	108	46	309	6	8	8	17	66	16	49	143	23
2016-03	pathology	1	9		40	40	41	617	85	84	72	1	72	209	0	629	350	490	39	108	46	309	6	9	8	17	66	16	49	143	23
2016-03	pharmacology and toxicology	3	11		40	40	41	617	85	84	72	1	72	209	0	629	350	490	39	108	46	309	6	9	11	17	66	16	49	143	23
2016-03	physiology	5	22		40	40	41	617	85	84	72	1	72	209	0	629	350	490	39	108	46	309	6	9	11	22	66	16	49	143	23
2016-03	plant biology	11	77		40	40	41	617	85	84	72	1	72	209	0	629	350	490	39	108	46	309	6	9	11	22	77	16	49	143	23
2016-03	scientific communication and education	3	19		40	40	41	617	85	84	72	1	72	209	0	629	350	490	39	108	46	309	6	9	11	22	77	19	49	143	23
2016-03	synthetic biology	3	52		40	40	41	617	85	84	72	1	72	209	0	629	350	490	39	108	46	309	6	9	11	22	77	19	52	143	23
2016-03	systems biology	12	155		40	40	41	617	85	84	72	1	72	209	0	629	350	490	39	108	46	309	6	9	11	22	77	19	52	155	23
2016-03	zoology	1	24		40	40	41	617	85	84	72	1	72	209	0	629	350	490	39	108	46	309	6	9	11	22	77	19	52	155	24
2016-04	animal behavior and cognition	6	46		46	40	41	617	85	84	72	1	72	209	0	629	350	490	39	108	46	309	6	9	11	22	77	19	52	155	24
2016-04	biochemistry	7	47		46	47	41	617	85	84	72	1	72	209	0	629	350	490	39	108	46	309	6	9	11	22	77	19	52	155	24
2016-04	bioengineering	5	46		46	47	46	617	85	84	72	1	72	209	0	629	350	490	39	108	46	309	6	9	11	22	77	19	52	155	24
2016-04	bioinformatics	55	672		46	47	46	672	85	84	72	1	72	209	0	629	350	490	39	108	46	309	6	9	11	22	77	19	52	155	24
2016-04	biophysics	10	95		46	47	46	672	95	84	72	1	72	209	0	629	350	490	39	108	46	309	6	9	11	22	77	19	52	155	24
2016-04	cancer biology	11	95		46	47	46	672	95	95	72	1	72	209	0	629	350	490	39	108	46	309	6	9	11	22	77	19	52	155	24
2016-04	cell biology	10	82		46	47	46	672	95	95	82	1	72	209	0	629	350	490	39	108	46	309	6	9	11	22	77	19	52	155	24
2016-04	developmental biology	7	79		46	47	46	672	95	95	82	1	79	209	0	629	350	490	39	108	46	309	6	9	11	22	77	19	52	155	24
2016-04	ecology	11	220		46	47	46	672	95	95	82	1	79	220	0	629	350	490	39	108	46	309	6	9	11	22	77	19	52	155	24
2016-04	epidemiology	3	3		46	47	46	672	95	95	82	1	79	220	3	629	350	490	39	108	46	309	6	9	11	22	77	19	52	155	24
2016-04	evolutionary biology	40	669		46	47	46	672	95	95	82	1	79	220	3	669	350	490	39	108	46	309	6	9	11	22	77	19	52	155	24
2016-04	genetics	24	374		46	47	46	672	95	95	82	1	79	220	3	669	374	490	39	108	46	309	6	9	11	22	77	19	52	155	24
2016-04	genomics	43	533		46	47	46	672	95	95	82	1	79	220	3	669	374	533	39	108	46	309	6	9	11	22	77	19	52	155	24
2016-04	immunology	3	42		46	47	46	672	95	95	82	1	79	220	3	669	374	533	42	108	46	309	6	9	11	22	77	19	52	155	24
2016-04	microbiology	29	137		46	47	46	672	95	95	82	1	79	220	3	669	374	533	42	137	46	309	6	9	11	22	77	19	52	155	24
2016-04	molecular biology	8	54		46	47	46	672	95	95	82	1	79	220	3	669	374	533	42	137	54	309	6	9	11	22	77	19	52	155	24
2016-04	neuroscience	39	348		46	47	46	672	95	95	82	1	79	220	3	669	374	533	42	137	54	348	6	9	11	22	77	19	52	155	24
2016-04	pathology	2	11		46	47	46	672	95	95	82	1	79	220	3	669	374	533	42	137	54	348	6	11	11	22	77	19	52	155	24
2016-04	pharmacology and toxicology	1	12		46	47	46	672	95	95	82	1	79	220	3	669	374	533	42	137	54	348	6	11	12	22	77	19	52	155	24
2016-04	physiology	2	24		46	47	46	672	95	95	82	1	79	220	3	669	374	533	42	137	54	348	6	11	12	24	77	19	52	155	24
2016-04	plant biology	8	85		46	47	46	672	95	95	82	1	79	220	3	669	374	533	42	137	54	348	6	11	12	24	85	19	52	155	24
2016-04	scientific communication and education	3	22		46	47	46	672	95	95	82	1	79	220	3	669	374	533	42	137	54	348	6	11	12	24	85	22	52	155	24
2016-04	synthetic biology	1	53		46	47	46	672	95	95	82	1	79	220	3	669	374	533	42	137	54	348	6	11	12	24	85	22	53	155	24
2016-04	systems biology	14	169		46	47	46	672	95	95	82	1	79	220	3	669	374	533	42	137	54	348	6	11	12	24	85	22	53	169	24
2016-04	zoology	3	27		46	47	46	672	95	95	82	1	79	220	3	669	374	533	42	137	54	348	6	11	12	24	85	22	53	169	27
2016-05	animal behavior and cognition	9	55		55	47	46	672	95	95	82	1	79	220	3	669	374	533	42	137	54	348	6	11	12	24	85	22	53	169	27
2016-05	biochemistry	8	55		55	55	46	672	95	95	82	1	79	220	3	669	374	533	42	137	54	348	6	11	12	24	85	22	53	169	27
2016-05	bioengineering	1	47		55	55	47	672	95	95	82	1	79	220	3	669	374	533	42	137	54	348	6	11	12	24	85	22	53	169	27
2016-05	bioinformatics	62	734		55	55	47	734	95	95	82	1	79	220	3	669	374	533	42	137	54	348	6	11	12	24	85	22	53	169	27
2016-05	biophysics	13	108		55	55	47	734	108	95	82	1	79	220	3	669	374	533	42	137	54	348	6	11	12	24	85	22	53	169	27
2016-05	cancer biology	9	104		55	55	47	734	108	104	82	1	79	220	3	669	374	533	42	137	54	348	6	11	12	24	85	22	53	169	27
2016-05	cell biology	9	91		55	55	47	734	108	104	91	1	79	220	3	669	374	533	42	137	54	348	6	11	12	24	85	22	53	169	27
2016-05	developmental biology	13	92		55	55	47	734	108	104	91	1	92	220	3	669	374	533	42	137	54	348	6	11	12	24	85	22	53	169	27
2016-05	ecology	20	240		55	55	47	734	108	104	91	1	92	240	3	669	374	533	42	137	54	348	6	11	12	24	85	22	53	169	27
2016-05	epidemiology	8	11		55	55	47	734	108	104	91	1	92	240	11	669	374	533	42	137	54	348	6	11	12	24	85	22	53	169	27
2016-05	evolutionary biology	45	714		55	55	47	734	108	104	91	1	92	240	11	714	374	533	42	137	54	348	6	11	12	24	85	22	53	169	27
2016-05	genetics	31	405		55	55	47	734	108	104	91	1	92	240	11	714	405	533	42	137	54	348	6	11	12	24	85	22	53	169	27
2016-05	genomics	40	573		55	55	47	734	108	104	91	1	92	240	11	714	405	573	42	137	54	348	6	11	12	24	85	22	53	169	27
2016-05	immunology	3	45		55	55	47	734	108	104	91	1	92	240	11	714	405	573	45	137	54	348	6	11	12	24	85	22	53	169	27
2016-05	microbiology	23	160		55	55	47	734	108	104	91	1	92	240	11	714	405	573	45	160	54	348	6	11	12	24	85	22	53	169	27
2016-05	molecular biology	7	61		55	55	47	734	108	104	91	1	92	240	11	714	405	573	45	160	61	348	6	11	12	24	85	22	53	169	27
2016-05	neuroscience	51	399		55	55	47	734	108	104	91	1	92	240	11	714	405	573	45	160	61	399	6	11	12	24	85	22	53	169	27
2016-05	pathology	1	12		55	55	47	734	108	104	91	1	92	240	11	714	405	573	45	160	61	399	6	12	12	24	85	22	53	169	27
2016-05	physiology	2	26		55	55	47	734	108	104	91	1	92	240	11	714	405	573	45	160	61	399	6	12	12	26	85	22	53	169	27
2016-05	plant biology	7	92		55	55	47	734	108	104	91	1	92	240	11	714	405	573	45	160	61	399	6	12	12	26	92	22	53	169	27
2016-05	scientific communication and education	6	28		55	55	47	734	108	104	91	1	92	240	11	714	405	573	45	160	61	399	6	12	12	26	92	28	53	169	27
2016-05	synthetic biology	4	57		55	55	47	734	108	104	91	1	92	240	11	714	405	573	45	160	61	399	6	12	12	26	92	28	57	169	27
2016-05	systems biology	15	184		55	55	47	734	108	104	91	1	92	240	11	714	405	573	45	160	61	399	6	12	12	26	92	28	57	184	27
2016-05	zoology	1	28		55	55	47	734	108	104	91	1	92	240	11	714	405	573	45	160	61	399	6	12	12	26	92	28	57	184	28
2016-06	animal behavior and cognition	10	65		65	55	47	734	108	104	91	1	92	240	11	714	405	573	45	160	61	399	6	12	12	26	92	28	57	184	28
2016-06	biochemistry	2	57		65	57	47	734	108	104	91	1	92	240	11	714	405	573	45	160	61	399	6	12	12	26	92	28	57	184	28
2016-06	bioengineering	4	51		65	57	51	734	108	104	91	1	92	240	11	714	405	573	45	160	61	399	6	12	12	26	92	28	57	184	28
2016-06	bioinformatics	59	793		65	57	51	793	108	104	91	1	92	240	11	714	405	573	45	160	61	399	6	12	12	26	92	28	57	184	28
2016-06	biophysics	14	122		65	57	51	793	122	104	91	1	92	240	11	714	405	573	45	160	61	399	6	12	12	26	92	28	57	184	28
2016-06	cancer biology	11	115		65	57	51	793	122	115	91	1	92	240	11	714	405	573	45	160	61	399	6	12	12	26	92	28	57	184	28
2016-06	cell biology	17	108		65	57	51	793	122	115	108	1	92	240	11	714	405	573	45	160	61	399	6	12	12	26	92	28	57	184	28
2016-06	developmental biology	6	98		65	57	51	793	122	115	108	1	98	240	11	714	405	573	45	160	61	399	6	12	12	26	92	28	57	184	28
2016-06	ecology	20	260		65	57	51	793	122	115	108	1	98	260	11	714	405	573	45	160	61	399	6	12	12	26	92	28	57	184	28
2016-06	epidemiology	7	18		65	57	51	793	122	115	108	1	98	260	18	714	405	573	45	160	61	399	6	12	12	26	92	28	57	184	28
2016-06	evolutionary biology	39	753		65	57	51	793	122	115	108	1	98	260	18	753	405	573	45	160	61	399	6	12	12	26	92	28	57	184	28
2016-06	genetics	24	429		65	57	51	793	122	115	108	1	98	260	18	753	429	573	45	160	61	399	6	12	12	26	92	28	57	184	28
2016-06	genomics	43	616		65	57	51	793	122	115	108	1	98	260	18	753	429	616	45	160	61	399	6	12	12	26	92	28	57	184	28
2016-06	immunology	6	51		65	57	51	793	122	115	108	1	98	260	18	753	429	616	51	160	61	399	6	12	12	26	92	28	57	184	28
2016-06	microbiology	21	181		65	57	51	793	122	115	108	1	98	260	18	753	429	616	51	181	61	399	6	12	12	26	92	28	57	184	28
2016-06	molecular biology	7	68		65	57	51	793	122	115	108	1	98	260	18	753	429	616	51	181	68	399	6	12	12	26	92	28	57	184	28
2016-06	neuroscience	69	468		65	57	51	793	122	115	108	1	98	260	18	753	429	616	51	181	68	468	6	12	12	26	92	28	57	184	28
2016-06	pathology	3	15		65	57	51	793	122	115	108	1	98	260	18	753	429	616	51	181	68	468	6	15	12	26	92	28	57	184	28
2016-06	pharmacology and toxicology	2	14		65	57	51	793	122	115	108	1	98	260	18	753	429	616	51	181	68	468	6	15	14	26	92	28	57	184	28
2016-06	physiology	2	28		65	57	51	793	122	115	108	1	98	260	18	753	429	616	51	181	68	468	6	15	14	28	92	28	57	184	28
2016-06	plant biology	8	100		65	57	51	793	122	115	108	1	98	260	18	753	429	616	51	181	68	468	6	15	14	28	100	28	57	184	28
2016-06	scientific communication and education	4	32		65	57	51	793	122	115	108	1	98	260	18	753	429	616	51	181	68	468	6	15	14	28	100	32	57	184	28
2016-06	synthetic biology	6	63		65	57	51	793	122	115	108	1	98	260	18	753	429	616	51	181	68	468	6	15	14	28	100	32	63	184	28
2016-06	systems biology	16	200		65	57	51	793	122	115	108	1	98	260	18	753	429	616	51	181	68	468	6	15	14	28	100	32	63	200	28
2016-07	animal behavior and cognition	7	72		72	57	51	793	122	115	108	1	98	260	18	753	429	616	51	181	68	468	6	15	14	28	100	32	63	200	28
2016-07	biochemistry	11	68		72	68	51	793	122	115	108	1	98	260	18	753	429	616	51	181	68	468	6	15	14	28	100	32	63	200	28
2016-07	bioengineering	2	53		72	68	53	793	122	115	108	1	98	260	18	753	429	616	51	181	68	468	6	15	14	28	100	32	63	200	28
2016-07	bioinformatics	52	845		72	68	53	845	122	115	108	1	98	260	18	753	429	616	51	181	68	468	6	15	14	28	100	32	63	200	28
2016-07	biophysics	17	139		72	68	53	845	139	115	108	1	98	260	18	753	429	616	51	181	68	468	6	15	14	28	100	32	63	200	28
2016-07	cancer biology	6	121		72	68	53	845	139	121	108	1	98	260	18	753	429	616	51	181	68	468	6	15	14	28	100	32	63	200	28
2016-07	cell biology	8	116		72	68	53	845	139	121	116	1	98	260	18	753	429	616	51	181	68	468	6	15	14	28	100	32	63	200	28
2016-07	developmental biology	5	103		72	68	53	845	139	121	116	1	103	260	18	753	429	616	51	181	68	468	6	15	14	28	100	32	63	200	28
2016-07	ecology	21	281		72	68	53	845	139	121	116	1	103	281	18	753	429	616	51	181	68	468	6	15	14	28	100	32	63	200	28
2016-07	epidemiology	11	29		72	68	53	845	139	121	116	1	103	281	29	753	429	616	51	181	68	468	6	15	14	28	100	32	63	200	28
2016-07	evolutionary biology	43	796		72	68	53	845	139	121	116	1	103	281	29	796	429	616	51	181	68	468	6	15	14	28	100	32	63	200	28
2016-07	genetics	35	464		72	68	53	845	139	121	116	1	103	281	29	796	464	616	51	181	68	468	6	15	14	28	100	32	63	200	28
2016-07	genomics	45	661		72	68	53	845	139	121	116	1	103	281	29	796	464	661	51	181	68	468	6	15	14	28	100	32	63	200	28
2016-07	immunology	11	62		72	68	53	845	139	121	116	1	103	281	29	796	464	661	62	181	68	468	6	15	14	28	100	32	63	200	28
2016-07	microbiology	21	202		72	68	53	845	139	121	116	1	103	281	29	796	464	661	62	202	68	468	6	15	14	28	100	32	63	200	28
2016-07	molecular biology	5	73		72	68	53	845	139	121	116	1	103	281	29	796	464	661	62	202	73	468	6	15	14	28	100	32	63	200	28
2016-07	neuroscience	61	529		72	68	53	845	139	121	116	1	103	281	29	796	464	661	62	202	73	529	6	15	14	28	100	32	63	200	28
2016-07	pathology	1	16		72	68	53	845	139	121	116	1	103	281	29	796	464	661	62	202	73	529	6	16	14	28	100	32	63	200	28
2016-07	pharmacology and toxicology	1	15		72	68	53	845	139	121	116	1	103	281	29	796	464	661	62	202	73	529	6	16	15	28	100	32	63	200	28
2016-07	plant biology	7	107		72	68	53	845	139	121	116	1	103	281	29	796	464	661	62	202	73	529	6	16	15	28	107	32	63	200	28
2016-07	scientific communication and education	1	33		72	68	53	845	139	121	116	1	103	281	29	796	464	661	62	202	73	529	6	16	15	28	107	33	63	200	28
2016-07	synthetic biology	1	64		72	68	53	845	139	121	116	1	103	281	29	796	464	661	62	202	73	529	6	16	15	28	107	33	64	200	28
2016-07	systems biology	10	210		72	68	53	845	139	121	116	1	103	281	29	796	464	661	62	202	73	529	6	16	15	28	107	33	64	210	28
2016-07	zoology	2	30		72	68	53	845	139	121	116	1	103	281	29	796	464	661	62	202	73	529	6	16	15	28	107	33	64	210	30
2016-08	animal behavior and cognition	9	81		81	68	53	845	139	121	116	1	103	281	29	796	464	661	62	202	73	529	6	16	15	28	107	33	64	210	30
2016-08	biochemistry	12	80		81	80	53	845	139	121	116	1	103	281	29	796	464	661	62	202	73	529	6	16	15	28	107	33	64	210	30
2016-08	bioengineering	2	55		81	80	55	845	139	121	116	1	103	281	29	796	464	661	62	202	73	529	6	16	15	28	107	33	64	210	30
2016-08	bioinformatics	66	911		81	80	55	911	139	121	116	1	103	281	29	796	464	661	62	202	73	529	6	16	15	28	107	33	64	210	30
2016-08	biophysics	21	160		81	80	55	911	160	121	116	1	103	281	29	796	464	661	62	202	73	529	6	16	15	28	107	33	64	210	30
2016-08	cancer biology	1	122		81	80	55	911	160	122	116	1	103	281	29	796	464	661	62	202	73	529	6	16	15	28	107	33	64	210	30
2016-08	cell biology	15	131		81	80	55	911	160	122	131	1	103	281	29	796	464	661	62	202	73	529	6	16	15	28	107	33	64	210	30
2016-08	developmental biology	9	112		81	80	55	911	160	122	131	1	112	281	29	796	464	661	62	202	73	529	6	16	15	28	107	33	64	210	30
2016-08	ecology	25	306		81	80	55	911	160	122	131	1	112	306	29	796	464	661	62	202	73	529	6	16	15	28	107	33	64	210	30
2016-08	epidemiology	9	38		81	80	55	911	160	122	131	1	112	306	38	796	464	661	62	202	73	529	6	16	15	28	107	33	64	210	30
2016-08	evolutionary biology	56	852		81	80	55	911	160	122	131	1	112	306	38	852	464	661	62	202	73	529	6	16	15	28	107	33	64	210	30
2016-08	genetics	34	498		81	80	55	911	160	122	131	1	112	306	38	852	498	661	62	202	73	529	6	16	15	28	107	33	64	210	30
2016-08	genomics	43	704		81	80	55	911	160	122	131	1	112	306	38	852	498	704	62	202	73	529	6	16	15	28	107	33	64	210	30
2016-08	immunology	3	65		81	80	55	911	160	122	131	1	112	306	38	852	498	704	65	202	73	529	6	16	15	28	107	33	64	210	30
2016-08	microbiology	26	228		81	80	55	911	160	122	131	1	112	306	38	852	498	704	65	228	73	529	6	16	15	28	107	33	64	210	30
2016-08	molecular biology	16	89		81	80	55	911	160	122	131	1	112	306	38	852	498	704	65	228	89	529	6	16	15	28	107	33	64	210	30
2016-08	neuroscience	54	583		81	80	55	911	160	122	131	1	112	306	38	852	498	704	65	228	89	583	6	16	15	28	107	33	64	210	30
2016-08	pathology	1	17		81	80	55	911	160	122	131	1	112	306	38	852	498	704	65	228	89	583	6	17	15	28	107	33	64	210	30
2016-08	pharmacology and toxicology	1	16		81	80	55	911	160	122	131	1	112	306	38	852	498	704	65	228	89	583	6	17	16	28	107	33	64	210	30
2016-08	physiology	2	30		81	80	55	911	160	122	131	1	112	306	38	852	498	704	65	228	89	583	6	17	16	30	107	33	64	210	30
2016-08	plant biology	11	118		81	80	55	911	160	122	131	1	112	306	38	852	498	704	65	228	89	583	6	17	16	30	118	33	64	210	30
2016-08	scientific communication and education	3	36		81	80	55	911	160	122	131	1	112	306	38	852	498	704	65	228	89	583	6	17	16	30	118	36	64	210	30
2016-08	synthetic biology	5	69		81	80	55	911	160	122	131	1	112	306	38	852	498	704	65	228	89	583	6	17	16	30	118	36	69	210	30
2016-08	systems biology	22	232		81	80	55	911	160	122	131	1	112	306	38	852	498	704	65	228	89	583	6	17	16	30	118	36	69	232	30
2016-08	zoology	2	32		81	80	55	911	160	122	131	1	112	306	38	852	498	704	65	228	89	583	6	17	16	30	118	36	69	232	32
2016-09	animal behavior and cognition	3	84		84	80	55	911	160	122	131	1	112	306	38	852	498	704	65	228	89	583	6	17	16	30	118	36	69	232	32
2016-09	biochemistry	8	88		84	88	55	911	160	122	131	1	112	306	38	852	498	704	65	228	89	583	6	17	16	30	118	36	69	232	32
2016-09	bioengineering	2	57		84	88	57	911	160	122	131	1	112	306	38	852	498	704	65	228	89	583	6	17	16	30	118	36	69	232	32
2016-09	bioinformatics	68	979		84	88	57	979	160	122	131	1	112	306	38	852	498	704	65	228	89	583	6	17	16	30	118	36	69	232	32
2016-09	biophysics	19	179		84	88	57	979	179	122	131	1	112	306	38	852	498	704	65	228	89	583	6	17	16	30	118	36	69	232	32
2016-09	cancer biology	3	125		84	88	57	979	179	125	131	1	112	306	38	852	498	704	65	228	89	583	6	17	16	30	118	36	69	232	32
2016-09	cell biology	23	154		84	88	57	979	179	125	154	1	112	306	38	852	498	704	65	228	89	583	6	17	16	30	118	36	69	232	32
2016-09	developmental biology	4	116		84	88	57	979	179	125	154	1	116	306	38	852	498	704	65	228	89	583	6	17	16	30	118	36	69	232	32
2016-09	ecology	24	330		84	88	57	979	179	125	154	1	116	330	38	852	498	704	65	228	89	583	6	17	16	30	118	36	69	232	32
2016-09	epidemiology	11	49		84	88	57	979	179	125	154	1	116	330	49	852	498	704	65	228	89	583	6	17	16	30	118	36	69	232	32
2016-09	evolutionary biology	32	884		84	88	57	979	179	125	154	1	116	330	49	884	498	704	65	228	89	583	6	17	16	30	118	36	69	232	32
2016-09	genetics	32	530		84	88	57	979	179	125	154	1	116	330	49	884	530	704	65	228	89	583	6	17	16	30	118	36	69	232	32
2016-09	genomics	56	760		84	88	57	979	179	125	154	1	116	330	49	884	530	760	65	228	89	583	6	17	16	30	118	36	69	232	32
2016-09	immunology	3	68		84	88	57	979	179	125	154	1	116	330	49	884	530	760	68	228	89	583	6	17	16	30	118	36	69	232	32
2016-09	microbiology	23	251		84	88	57	979	179	125	154	1	116	330	49	884	530	760	68	251	89	583	6	17	16	30	118	36	69	232	32
2016-09	molecular biology	11	100		84	88	57	979	179	125	154	1	116	330	49	884	530	760	68	251	100	583	6	17	16	30	118	36	69	232	32
2016-09	neuroscience	74	657		84	88	57	979	179	125	154	1	116	330	49	884	530	760	68	251	100	657	6	17	16	30	118	36	69	232	32
2016-09	paleontology	1	7		84	88	57	979	179	125	154	1	116	330	49	884	530	760	68	251	100	657	7	17	16	30	118	36	69	232	32
2016-09	pharmacology and toxicology	3	19		84	88	57	979	179	125	154	1	116	330	49	884	530	760	68	251	100	657	7	17	19	30	118	36	69	232	32
2016-09	physiology	3	33		84	88	57	979	179	125	154	1	116	330	49	884	530	760	68	251	100	657	7	17	19	33	118	36	69	232	32
2016-09	plant biology	9	127		84	88	57	979	179	125	154	1	116	330	49	884	530	760	68	251	100	657	7	17	19	33	127	36	69	232	32
2016-09	scientific communication and education	1	37		84	88	57	979	179	125	154	1	116	330	49	884	530	760	68	251	100	657	7	17	19	33	127	37	69	232	32
2016-09	synthetic biology	6	75		84	88	57	979	179	125	154	1	116	330	49	884	530	760	68	251	100	657	7	17	19	33	127	37	75	232	32
2016-09	systems biology	15	247		84	88	57	979	179	125	154	1	116	330	49	884	530	760	68	251	100	657	7	17	19	33	127	37	75	247	32
2016-09	zoology	2	34		84	88	57	979	179	125	154	1	116	330	49	884	530	760	68	251	100	657	7	17	19	33	127	37	75	247	34
2016-10	animal behavior and cognition	8	92		92	88	57	979	179	125	154	1	116	330	49	884	530	760	68	251	100	657	7	17	19	33	127	37	75	247	34
2016-10	biochemistry	10	98		92	98	57	979	179	125	154	1	116	330	49	884	530	760	68	251	100	657	7	17	19	33	127	37	75	247	34
2016-10	bioengineering	5	62		92	98	62	979	179	125	154	1	116	330	49	884	530	760	68	251	100	657	7	17	19	33	127	37	75	247	34
2016-10	bioinformatics	69	1048		92	98	62	1048	179	125	154	1	116	330	49	884	530	760	68	251	100	657	7	17	19	33	127	37	75	247	34
2016-10	biophysics	20	199		92	98	62	1048	199	125	154	1	116	330	49	884	530	760	68	251	100	657	7	17	19	33	127	37	75	247	34
2016-10	cancer biology	11	136		92	98	62	1048	199	136	154	1	116	330	49	884	530	760	68	251	100	657	7	17	19	33	127	37	75	247	34
2016-10	cell biology	8	162		92	98	62	1048	199	136	162	1	116	330	49	884	530	760	68	251	100	657	7	17	19	33	127	37	75	247	34
2016-10	developmental biology	7	123		92	98	62	1048	199	136	162	1	123	330	49	884	530	760	68	251	100	657	7	17	19	33	127	37	75	247	34
2016-10	ecology	22	352		92	98	62	1048	199	136	162	1	123	352	49	884	530	760	68	251	100	657	7	17	19	33	127	37	75	247	34
2016-10	epidemiology	14	63		92	98	62	1048	199	136	162	1	123	352	63	884	530	760	68	251	100	657	7	17	19	33	127	37	75	247	34
2016-10	evolutionary biology	48	932		92	98	62	1048	199	136	162	1	123	352	63	932	530	760	68	251	100	657	7	17	19	33	127	37	75	247	34
2016-10	genetics	33	563		92	98	62	1048	199	136	162	1	123	352	63	932	563	760	68	251	100	657	7	17	19	33	127	37	75	247	34
2016-10	genomics	36	796		92	98	62	1048	199	136	162	1	123	352	63	932	563	796	68	251	100	657	7	17	19	33	127	37	75	247	34
2016-10	immunology	1	69		92	98	62	1048	199	136	162	1	123	352	63	932	563	796	69	251	100	657	7	17	19	33	127	37	75	247	34
2016-10	microbiology	26	277		92	98	62	1048	199	136	162	1	123	352	63	932	563	796	69	277	100	657	7	17	19	33	127	37	75	247	34
2016-10	molecular biology	6	106		92	98	62	1048	199	136	162	1	123	352	63	932	563	796	69	277	106	657	7	17	19	33	127	37	75	247	34
2016-10	neuroscience	93	750		92	98	62	1048	199	136	162	1	123	352	63	932	563	796	69	277	106	750	7	17	19	33	127	37	75	247	34
2016-10	paleontology	1	8		92	98	62	1048	199	136	162	1	123	352	63	932	563	796	69	277	106	750	8	17	19	33	127	37	75	247	34
2016-10	pathology	1	18		92	98	62	1048	199	136	162	1	123	352	63	932	563	796	69	277	106	750	8	18	19	33	127	37	75	247	34
2016-10	physiology	4	37		92	98	62	1048	199	136	162	1	123	352	63	932	563	796	69	277	106	750	8	18	19	37	127	37	75	247	34
2016-10	plant biology	9	136		92	98	62	1048	199	136	162	1	123	352	63	932	563	796	69	277	106	750	8	18	19	37	136	37	75	247	34
2016-10	scientific communication and education	2	39		92	98	62	1048	199	136	162	1	123	352	63	932	563	796	69	277	106	750	8	18	19	37	136	39	75	247	34
2016-10	synthetic biology	5	80		92	98	62	1048	199	136	162	1	123	352	63	932	563	796	69	277	106	750	8	18	19	37	136	39	80	247	34
2016-10	systems biology	15	262		92	98	62	1048	199	136	162	1	123	352	63	932	563	796	69	277	106	750	8	18	19	37	136	39	80	262	34
2016-10	zoology	1	35		92	98	62	1048	199	136	162	1	123	352	63	932	563	796	69	277	106	750	8	18	19	37	136	39	80	262	35
2016-11	animal behavior and cognition	5	97		97	98	62	1048	199	136	162	1	123	352	63	932	563	796	69	277	106	750	8	18	19	37	136	39	80	262	35
2016-11	biochemistry	13	111		97	111	62	1048	199	136	162	1	123	352	63	932	563	796	69	277	106	750	8	18	19	37	136	39	80	262	35
2016-11	bioengineering	1	63		97	111	63	1048	199	136	162	1	123	352	63	932	563	796	69	277	106	750	8	18	19	37	136	39	80	262	35
2016-11	bioinformatics	70	1118		97	111	63	1118	199	136	162	1	123	352	63	932	563	796	69	277	106	750	8	18	19	37	136	39	80	262	35
2016-11	biophysics	23	222		97	111	63	1118	222	136	162	1	123	352	63	932	563	796	69	277	106	750	8	18	19	37	136	39	80	262	35
2016-11	cancer biology	13	149		97	111	63	1118	222	149	162	1	123	352	63	932	563	796	69	277	106	750	8	18	19	37	136	39	80	262	35
2016-11	cell biology	14	176		97	111	63	1118	222	149	176	1	123	352	63	932	563	796	69	277	106	750	8	18	19	37	136	39	80	262	35
2016-11	clinical trials	1	2		97	111	63	1118	222	149	176	2	123	352	63	932	563	796	69	277	106	750	8	18	19	37	136	39	80	262	35
2016-11	developmental biology	7	130		97	111	63	1118	222	149	176	2	130	352	63	932	563	796	69	277	106	750	8	18	19	37	136	39	80	262	35
2016-11	ecology	19	371		97	111	63	1118	222	149	176	2	130	371	63	932	563	796	69	277	106	750	8	18	19	37	136	39	80	262	35
2016-11	epidemiology	9	72		97	111	63	1118	222	149	176	2	130	371	72	932	563	796	69	277	106	750	8	18	19	37	136	39	80	262	35
2016-11	evolutionary biology	45	977		97	111	63	1118	222	149	176	2	130	371	72	977	563	796	69	277	106	750	8	18	19	37	136	39	80	262	35
2016-11	genetics	31	594		97	111	63	1118	222	149	176	2	130	371	72	977	594	796	69	277	106	750	8	18	19	37	136	39	80	262	35
2016-11	genomics	38	834		97	111	63	1118	222	149	176	2	130	371	72	977	594	834	69	277	106	750	8	18	19	37	136	39	80	262	35
2016-11	immunology	7	76		97	111	63	1118	222	149	176	2	130	371	72	977	594	834	76	277	106	750	8	18	19	37	136	39	80	262	35
2016-11	microbiology	26	303		97	111	63	1118	222	149	176	2	130	371	72	977	594	834	76	303	106	750	8	18	19	37	136	39	80	262	35
2016-11	molecular biology	8	114		97	111	63	1118	222	149	176	2	130	371	72	977	594	834	76	303	114	750	8	18	19	37	136	39	80	262	35
2016-11	neuroscience	82	832		97	111	63	1118	222	149	176	2	130	371	72	977	594	834	76	303	114	832	8	18	19	37	136	39	80	262	35
2016-11	pharmacology and toxicology	5	24		97	111	63	1118	222	149	176	2	130	371	72	977	594	834	76	303	114	832	8	18	24	37	136	39	80	262	35
2016-11	physiology	1	38		97	111	63	1118	222	149	176	2	130	371	72	977	594	834	76	303	114	832	8	18	24	38	136	39	80	262	35
2016-11	plant biology	12	148		97	111	63	1118	222	149	176	2	130	371	72	977	594	834	76	303	114	832	8	18	24	38	148	39	80	262	35
2016-11	scientific communication and education	6	45		97	111	63	1118	222	149	176	2	130	371	72	977	594	834	76	303	114	832	8	18	24	38	148	45	80	262	35
2016-11	synthetic biology	11	91		97	111	63	1118	222	149	176	2	130	371	72	977	594	834	76	303	114	832	8	18	24	38	148	45	91	262	35
2016-11	systems biology	15	277		97	111	63	1118	222	149	176	2	130	371	72	977	594	834	76	303	114	832	8	18	24	38	148	45	91	277	35
2016-11	zoology	1	36		97	111	63	1118	222	149	176	2	130	371	72	977	594	834	76	303	114	832	8	18	24	38	148	45	91	277	36
2016-12	animal behavior and cognition	6	103		103	111	63	1118	222	149	176	2	130	371	72	977	594	834	76	303	114	832	8	18	24	38	148	45	91	277	36
2016-12	biochemistry	14	125		103	125	63	1118	222	149	176	2	130	371	72	977	594	834	76	303	114	832	8	18	24	38	148	45	91	277	36
2016-12	bioengineering	2	65		103	125	65	1118	222	149	176	2	130	371	72	977	594	834	76	303	114	832	8	18	24	38	148	45	91	277	36
2016-12	bioinformatics	76	1194		103	125	65	1194	222	149	176	2	130	371	72	977	594	834	76	303	114	832	8	18	24	38	148	45	91	277	36
2016-12	biophysics	24	246		103	125	65	1194	246	149	176	2	130	371	72	977	594	834	76	303	114	832	8	18	24	38	148	45	91	277	36
2016-12	cancer biology	14	163		103	125	65	1194	246	163	176	2	130	371	72	977	594	834	76	303	114	832	8	18	24	38	148	45	91	277	36
2016-12	cell biology	26	202		103	125	65	1194	246	163	202	2	130	371	72	977	594	834	76	303	114	832	8	18	24	38	148	45	91	277	36
2016-12	clinical trials	1	3		103	125	65	1194	246	163	202	3	130	371	72	977	594	834	76	303	114	832	8	18	24	38	148	45	91	277	36
2016-12	developmental biology	16	146		103	125	65	1194	246	163	202	3	146	371	72	977	594	834	76	303	114	832	8	18	24	38	148	45	91	277	36
2016-12	ecology	20	391		103	125	65	1194	246	163	202	3	146	391	72	977	594	834	76	303	114	832	8	18	24	38	148	45	91	277	36
2016-12	epidemiology	6	78		103	125	65	1194	246	163	202	3	146	391	78	977	594	834	76	303	114	832	8	18	24	38	148	45	91	277	36
2016-12	evolutionary biology	65	1042		103	125	65	1194	246	163	202	3	146	391	78	1042	594	834	76	303	114	832	8	18	24	38	148	45	91	277	36
2016-12	genetics	38	632		103	125	65	1194	246	163	202	3	146	391	78	1042	632	834	76	303	114	832	8	18	24	38	148	45	91	277	36
2016-12	genomics	62	896		103	125	65	1194	246	163	202	3	146	391	78	1042	632	896	76	303	114	832	8	18	24	38	148	45	91	277	36
2016-12	immunology	4	80		103	125	65	1194	246	163	202	3	146	391	78	1042	632	896	80	303	114	832	8	18	24	38	148	45	91	277	36
2016-12	microbiology	37	340		103	125	65	1194	246	163	202	3	146	391	78	1042	632	896	80	340	114	832	8	18	24	38	148	45	91	277	36
2016-12	molecular biology	13	127		103	125	65	1194	246	163	202	3	146	391	78	1042	632	896	80	340	127	832	8	18	24	38	148	45	91	277	36
2016-12	neuroscience	91	923		103	125	65	1194	246	163	202	3	146	391	78	1042	632	896	80	340	127	923	8	18	24	38	148	45	91	277	36
2016-12	pathology	1	19		103	125	65	1194	246	163	202	3	146	391	78	1042	632	896	80	340	127	923	8	19	24	38	148	45	91	277	36
2016-12	pharmacology and toxicology	4	28		103	125	65	1194	246	163	202	3	146	391	78	1042	632	896	80	340	127	923	8	19	28	38	148	45	91	277	36
2016-12	physiology	3	41		103	125	65	1194	246	163	202	3	146	391	78	1042	632	896	80	340	127	923	8	19	28	41	148	45	91	277	36
2016-12	plant biology	8	156		103	125	65	1194	246	163	202	3	146	391	78	1042	632	896	80	340	127	923	8	19	28	41	156	45	91	277	36
2016-12	scientific communication and education	3	48		103	125	65	1194	246	163	202	3	146	391	78	1042	632	896	80	340	127	923	8	19	28	41	156	48	91	277	36
2016-12	synthetic biology	7	98		103	125	65	1194	246	163	202	3	146	391	78	1042	632	896	80	340	127	923	8	19	28	41	156	48	98	277	36
2016-12	systems biology	13	290		103	125	65	1194	246	163	202	3	146	391	78	1042	632	896	80	340	127	923	8	19	28	41	156	48	98	290	36
2016-12	zoology	3	39		103	125	65	1194	246	163	202	3	146	391	78	1042	632	896	80	340	127	923	8	19	28	41	156	48	98	290	39
2017-01	animal behavior and cognition	13	116		116	125	65	1194	246	163	202	3	146	391	78	1042	632	896	80	340	127	923	8	19	28	41	156	48	98	290	39
2017-01	biochemistry	12	137		116	137	65	1194	246	163	202	3	146	391	78	1042	632	896	80	340	127	923	8	19	28	41	156	48	98	290	39
2017-01	bioengineering	8	73		116	137	73	1194	246	163	202	3	146	391	78	1042	632	896	80	340	127	923	8	19	28	41	156	48	98	290	39
2017-01	bioinformatics	78	1272		116	137	73	1272	246	163	202	3	146	391	78	1042	632	896	80	340	127	923	8	19	28	41	156	48	98	290	39
2017-01	biophysics	24	270		116	137	73	1272	270	163	202	3	146	391	78	1042	632	896	80	340	127	923	8	19	28	41	156	48	98	290	39
2017-01	cancer biology	11	174		116	137	73	1272	270	174	202	3	146	391	78	1042	632	896	80	340	127	923	8	19	28	41	156	48	98	290	39
2017-01	cell biology	18	220		116	137	73	1272	270	174	220	3	146	391	78	1042	632	896	80	340	127	923	8	19	28	41	156	48	98	290	39
2017-01	clinical trials	1	4		116	137	73	1272	270	174	220	4	146	391	78	1042	632	896	80	340	127	923	8	19	28	41	156	48	98	290	39
2017-01	developmental biology	19	165		116	137	73	1272	270	174	220	4	165	391	78	1042	632	896	80	340	127	923	8	19	28	41	156	48	98	290	39
2017-01	ecology	24	415		116	137	73	1272	270	174	220	4	165	415	78	1042	632	896	80	340	127	923	8	19	28	41	156	48	98	290	39
2017-01	epidemiology	16	94		116	137	73	1272	270	174	220	4	165	415	94	1042	632	896	80	340	127	923	8	19	28	41	156	48	98	290	39
2017-01	evolutionary biology	43	1085		116	137	73	1272	270	174	220	4	165	415	94	1085	632	896	80	340	127	923	8	19	28	41	156	48	98	290	39
2017-01	genetics	42	674		116	137	73	1272	270	174	220	4	165	415	94	1085	674	896	80	340	127	923	8	19	28	41	156	48	98	290	39
2017-01	genomics	60	956		116	137	73	1272	270	174	220	4	165	415	94	1085	674	956	80	340	127	923	8	19	28	41	156	48	98	290	39
2017-01	immunology	4	84		116	137	73	1272	270	174	220	4	165	415	94	1085	674	956	84	340	127	923	8	19	28	41	156	48	98	290	39
2017-01	microbiology	40	380		116	137	73	1272	270	174	220	4	165	415	94	1085	674	956	84	380	127	923	8	19	28	41	156	48	98	290	39
2017-01	molecular biology	16	143		116	137	73	1272	270	174	220	4	165	415	94	1085	674	956	84	380	143	923	8	19	28	41	156	48	98	290	39
2017-01	neuroscience	103	1026		116	137	73	1272	270	174	220	4	165	415	94	1085	674	956	84	380	143	1026	8	19	28	41	156	48	98	290	39
2017-01	pharmacology and toxicology	4	32		116	137	73	1272	270	174	220	4	165	415	94	1085	674	956	84	380	143	1026	8	19	32	41	156	48	98	290	39
2017-01	physiology	2	43		116	137	73	1272	270	174	220	4	165	415	94	1085	674	956	84	380	143	1026	8	19	32	43	156	48	98	290	39
2017-01	plant biology	17	173		116	137	73	1272	270	174	220	4	165	415	94	1085	674	956	84	380	143	1026	8	19	32	43	173	48	98	290	39
2017-01	scientific communication and education	4	52		116	137	73	1272	270	174	220	4	165	415	94	1085	674	956	84	380	143	1026	8	19	32	43	173	52	98	290	39
2017-01	synthetic biology	3	101		116	137	73	1272	270	174	220	4	165	415	94	1085	674	956	84	380	143	1026	8	19	32	43	173	52	101	290	39
2017-01	systems biology	20	310		116	137	73	1272	270	174	220	4	165	415	94	1085	674	956	84	380	143	1026	8	19	32	43	173	52	101	310	39
2017-01	zoology	4	43		116	137	73	1272	270	174	220	4	165	415	94	1085	674	956	84	380	143	1026	8	19	32	43	173	52	101	310	43
2017-02	animal behavior and cognition	12	128		128	137	73	1272	270	174	220	4	165	415	94	1085	674	956	84	380	143	1026	8	19	32	43	173	52	101	310	43
2017-02	biochemistry	8	145		128	145	73	1272	270	174	220	4	165	415	94	1085	674	956	84	380	143	1026	8	19	32	43	173	52	101	310	43
2017-02	bioengineering	8	81		128	145	81	1272	270	174	220	4	165	415	94	1085	674	956	84	380	143	1026	8	19	32	43	173	52	101	310	43
2017-02	bioinformatics	63	1335		128	145	81	1335	270	174	220	4	165	415	94	1085	674	956	84	380	143	1026	8	19	32	43	173	52	101	310	43
2017-02	biophysics	18	288		128	145	81	1335	288	174	220	4	165	415	94	1085	674	956	84	380	143	1026	8	19	32	43	173	52	101	310	43
2017-02	cancer biology	12	186		128	145	81	1335	288	186	220	4	165	415	94	1085	674	956	84	380	143	1026	8	19	32	43	173	52	101	310	43
2017-02	cell biology	25	245		128	145	81	1335	288	186	245	4	165	415	94	1085	674	956	84	380	143	1026	8	19	32	43	173	52	101	310	43
2017-02	clinical trials	1	5		128	145	81	1335	288	186	245	5	165	415	94	1085	674	956	84	380	143	1026	8	19	32	43	173	52	101	310	43
2017-02	developmental biology	23	188		128	145	81	1335	288	186	245	5	188	415	94	1085	674	956	84	380	143	1026	8	19	32	43	173	52	101	310	43
2017-02	ecology	32	447		128	145	81	1335	288	186	245	5	188	447	94	1085	674	956	84	380	143	1026	8	19	32	43	173	52	101	310	43
2017-02	epidemiology	17	111		128	145	81	1335	288	186	245	5	188	447	111	1085	674	956	84	380	143	1026	8	19	32	43	173	52	101	310	43
2017-02	evolutionary biology	48	1133		128	145	81	1335	288	186	245	5	188	447	111	1133	674	956	84	380	143	1026	8	19	32	43	173	52	101	310	43
2017-02	genetics	52	726		128	145	81	1335	288	186	245	5	188	447	111	1133	726	956	84	380	143	1026	8	19	32	43	173	52	101	310	43
2017-02	genomics	62	1018		128	145	81	1335	288	186	245	5	188	447	111	1133	726	1018	84	380	143	1026	8	19	32	43	173	52	101	310	43
2017-02	immunology	12	96		128	145	81	1335	288	186	245	5	188	447	111	1133	726	1018	96	380	143	1026	8	19	32	43	173	52	101	310	43
2017-02	microbiology	42	422		128	145	81	1335	288	186	245	5	188	447	111	1133	726	1018	96	422	143	1026	8	19	32	43	173	52	101	310	43
2017-02	molecular biology	16	159		128	145	81	1335	288	186	245	5	188	447	111	1133	726	1018	96	422	159	1026	8	19	32	43	173	52	101	310	43
2017-02	neuroscience	102	1128		128	145	81	1335	288	186	245	5	188	447	111	1133	726	1018	96	422	159	1128	8	19	32	43	173	52	101	310	43
2017-02	paleontology	1	9		128	145	81	1335	288	186	245	5	188	447	111	1133	726	1018	96	422	159	1128	9	19	32	43	173	52	101	310	43
2017-02	pathology	2	21		128	145	81	1335	288	186	245	5	188	447	111	1133	726	1018	96	422	159	1128	9	21	32	43	173	52	101	310	43
2017-02	pharmacology and toxicology	5	37		128	145	81	1335	288	186	245	5	188	447	111	1133	726	1018	96	422	159	1128	9	21	37	43	173	52	101	310	43
2017-02	physiology	3	46		128	145	81	1335	288	186	245	5	188	447	111	1133	726	1018	96	422	159	1128	9	21	37	46	173	52	101	310	43
2017-02	plant biology	14	187		128	145	81	1335	288	186	245	5	188	447	111	1133	726	1018	96	422	159	1128	9	21	37	46	187	52	101	310	43
2017-02	scientific communication and education	11	63		128	145	81	1335	288	186	245	5	188	447	111	1133	726	1018	96	422	159	1128	9	21	37	46	187	63	101	310	43
2017-02	synthetic biology	11	112		128	145	81	1335	288	186	245	5	188	447	111	1133	726	1018	96	422	159	1128	9	21	37	46	187	63	112	310	43
2017-02	systems biology	21	331		128	145	81	1335	288	186	245	5	188	447	111	1133	726	1018	96	422	159	1128	9	21	37	46	187	63	112	331	43
2017-02	zoology	2	45		128	145	81	1335	288	186	245	5	188	447	111	1133	726	1018	96	422	159	1128	9	21	37	46	187	63	112	331	45
2017-03	animal behavior and cognition	10	138		138	145	81	1335	288	186	245	5	188	447	111	1133	726	1018	96	422	159	1128	9	21	37	46	187	63	112	331	45
2017-03	biochemistry	24	169		138	169	81	1335	288	186	245	5	188	447	111	1133	726	1018	96	422	159	1128	9	21	37	46	187	63	112	331	45
2017-03	bioengineering	8	89		138	169	89	1335	288	186	245	5	188	447	111	1133	726	1018	96	422	159	1128	9	21	37	46	187	63	112	331	45
2017-03	bioinformatics	110	1445		138	169	89	1445	288	186	245	5	188	447	111	1133	726	1018	96	422	159	1128	9	21	37	46	187	63	112	331	45
2017-03	biophysics	27	315		138	169	89	1445	315	186	245	5	188	447	111	1133	726	1018	96	422	159	1128	9	21	37	46	187	63	112	331	45
2017-03	cancer biology	17	203		138	169	89	1445	315	203	245	5	188	447	111	1133	726	1018	96	422	159	1128	9	21	37	46	187	63	112	331	45
2017-03	cell biology	33	278		138	169	89	1445	315	203	278	5	188	447	111	1133	726	1018	96	422	159	1128	9	21	37	46	187	63	112	331	45
2017-03	clinical trials	1	6		138	169	89	1445	315	203	278	6	188	447	111	1133	726	1018	96	422	159	1128	9	21	37	46	187	63	112	331	45
2017-03	developmental biology	19	207		138	169	89	1445	315	203	278	6	207	447	111	1133	726	1018	96	422	159	1128	9	21	37	46	187	63	112	331	45
2017-03	ecology	30	477		138	169	89	1445	315	203	278	6	207	477	111	1133	726	1018	96	422	159	1128	9	21	37	46	187	63	112	331	45
2017-03	epidemiology	25	136		138	169	89	1445	315	203	278	6	207	477	136	1133	726	1018	96	422	159	1128	9	21	37	46	187	63	112	331	45
2017-03	evolutionary biology	97	1230		138	169	89	1445	315	203	278	6	207	477	136	1230	726	1018	96	422	159	1128	9	21	37	46	187	63	112	331	45
2017-03	genetics	57	783		138	169	89	1445	315	203	278	6	207	477	136	1230	783	1018	96	422	159	1128	9	21	37	46	187	63	112	331	45
2017-03	genomics	65	1083		138	169	89	1445	315	203	278	6	207	477	136	1230	783	1083	96	422	159	1128	9	21	37	46	187	63	112	331	45
2017-03	immunology	10	106		138	169	89	1445	315	203	278	6	207	477	136	1230	783	1083	106	422	159	1128	9	21	37	46	187	63	112	331	45
2017-03	microbiology	55	477		138	169	89	1445	315	203	278	6	207	477	136	1230	783	1083	106	477	159	1128	9	21	37	46	187	63	112	331	45
2017-03	molecular biology	17	176		138	169	89	1445	315	203	278	6	207	477	136	1230	783	1083	106	477	176	1128	9	21	37	46	187	63	112	331	45
2017-03	neuroscience	114	1242		138	169	89	1445	315	203	278	6	207	477	136	1230	783	1083	106	477	176	1242	9	21	37	46	187	63	112	331	45
2017-03	paleontology	1	10		138	169	89	1445	315	203	278	6	207	477	136	1230	783	1083	106	477	176	1242	10	21	37	46	187	63	112	331	45
2017-03	pathology	2	23		138	169	89	1445	315	203	278	6	207	477	136	1230	783	1083	106	477	176	1242	10	23	37	46	187	63	112	331	45
2017-03	pharmacology and toxicology	6	43		138	169	89	1445	315	203	278	6	207	477	136	1230	783	1083	106	477	176	1242	10	23	43	46	187	63	112	331	45
2017-03	physiology	6	52		138	169	89	1445	315	203	278	6	207	477	136	1230	783	1083	106	477	176	1242	10	23	43	52	187	63	112	331	45
2017-03	plant biology	31	218		138	169	89	1445	315	203	278	6	207	477	136	1230	783	1083	106	477	176	1242	10	23	43	52	218	63	112	331	45
2017-03	scientific communication and education	5	68		138	169	89	1445	315	203	278	6	207	477	136	1230	783	1083	106	477	176	1242	10	23	43	52	218	68	112	331	45
2017-03	synthetic biology	11	123		138	169	89	1445	315	203	278	6	207	477	136	1230	783	1083	106	477	176	1242	10	23	43	52	218	68	123	331	45
2017-03	systems biology	28	359		138	169	89	1445	315	203	278	6	207	477	136	1230	783	1083	106	477	176	1242	10	23	43	52	218	68	123	359	45
2017-03	zoology	3	48		138	169	89	1445	315	203	278	6	207	477	136	1230	783	1083	106	477	176	1242	10	23	43	52	218	68	123	359	48
2017-04	animal behavior and cognition	8	146		146	169	89	1445	315	203	278	6	207	477	136	1230	783	1083	106	477	176	1242	10	23	43	52	218	68	123	359	48
2017-04	biochemistry	29	198		146	198	89	1445	315	203	278	6	207	477	136	1230	783	1083	106	477	176	1242	10	23	43	52	218	68	123	359	48
2017-04	bioengineering	10	99		146	198	99	1445	315	203	278	6	207	477	136	1230	783	1083	106	477	176	1242	10	23	43	52	218	68	123	359	48
2017-04	bioinformatics	92	1537		146	198	99	1537	315	203	278	6	207	477	136	1230	783	1083	106	477	176	1242	10	23	43	52	218	68	123	359	48
2017-04	biophysics	27	342		146	198	99	1537	342	203	278	6	207	477	136	1230	783	1083	106	477	176	1242	10	23	43	52	218	68	123	359	48
2017-04	cancer biology	24	227		146	198	99	1537	342	227	278	6	207	477	136	1230	783	1083	106	477	176	1242	10	23	43	52	218	68	123	359	48
2017-04	cell biology	34	312		146	198	99	1537	342	227	312	6	207	477	136	1230	783	1083	106	477	176	1242	10	23	43	52	218	68	123	359	48
2017-04	clinical trials	2	8		146	198	99	1537	342	227	312	8	207	477	136	1230	783	1083	106	477	176	1242	10	23	43	52	218	68	123	359	48
2017-04	developmental biology	25	232		146	198	99	1537	342	227	312	8	232	477	136	1230	783	1083	106	477	176	1242	10	23	43	52	218	68	123	359	48
2017-04	ecology	26	503		146	198	99	1537	342	227	312	8	232	503	136	1230	783	1083	106	477	176	1242	10	23	43	52	218	68	123	359	48
2017-04	epidemiology	28	164		146	198	99	1537	342	227	312	8	232	503	164	1230	783	1083	106	477	176	1242	10	23	43	52	218	68	123	359	48
2017-04	evolutionary biology	44	1274		146	198	99	1537	342	227	312	8	232	503	164	1274	783	1083	106	477	176	1242	10	23	43	52	218	68	123	359	48
2017-04	genetics	48	831		146	198	99	1537	342	227	312	8	232	503	164	1274	831	1083	106	477	176	1242	10	23	43	52	218	68	123	359	48
2017-04	genomics	61	1144		146	198	99	1537	342	227	312	8	232	503	164	1274	831	1144	106	477	176	1242	10	23	43	52	218	68	123	359	48
2017-04	immunology	9	115		146	198	99	1537	342	227	312	8	232	503	164	1274	831	1144	115	477	176	1242	10	23	43	52	218	68	123	359	48
2017-04	microbiology	43	520		146	198	99	1537	342	227	312	8	232	503	164	1274	831	1144	115	520	176	1242	10	23	43	52	218	68	123	359	48
2017-04	molecular biology	21	197		146	198	99	1537	342	227	312	8	232	503	164	1274	831	1144	115	520	197	1242	10	23	43	52	218	68	123	359	48
2017-04	neuroscience	130	1372		146	198	99	1537	342	227	312	8	232	503	164	1274	831	1144	115	520	197	1372	10	23	43	52	218	68	123	359	48
2017-04	paleontology	1	11		146	198	99	1537	342	227	312	8	232	503	164	1274	831	1144	115	520	197	1372	11	23	43	52	218	68	123	359	48
2017-04	pathology	2	25		146	198	99	1537	342	227	312	8	232	503	164	1274	831	1144	115	520	197	1372	11	25	43	52	218	68	123	359	48
2017-04	pharmacology and toxicology	10	53		146	198	99	1537	342	227	312	8	232	503	164	1274	831	1144	115	520	197	1372	11	25	53	52	218	68	123	359	48
2017-04	physiology	7	59		146	198	99	1537	342	227	312	8	232	503	164	1274	831	1144	115	520	197	1372	11	25	53	59	218	68	123	359	48
2017-04	plant biology	19	237		146	198	99	1537	342	227	312	8	232	503	164	1274	831	1144	115	520	197	1372	11	25	53	59	237	68	123	359	48
2017-04	scientific communication and education	5	73		146	198	99	1537	342	227	312	8	232	503	164	1274	831	1144	115	520	197	1372	11	25	53	59	237	73	123	359	48
2017-04	synthetic biology	5	128		146	198	99	1537	342	227	312	8	232	503	164	1274	831	1144	115	520	197	1372	11	25	53	59	237	73	128	359	48
2017-04	systems biology	28	387		146	198	99	1537	342	227	312	8	232	503	164	1274	831	1144	115	520	197	1372	11	25	53	59	237	73	128	387	48
2017-04	zoology	3	51		146	198	99	1537	342	227	312	8	232	503	164	1274	831	1144	115	520	197	1372	11	25	53	59	237	73	128	387	51
2017-05	animal behavior and cognition	12	158		158	198	99	1537	342	227	312	8	232	503	164	1274	831	1144	115	520	197	1372	11	25	53	59	237	73	128	387	51
2017-05	biochemistry	22	220		158	220	99	1537	342	227	312	8	232	503	164	1274	831	1144	115	520	197	1372	11	25	53	59	237	73	128	387	51
2017-05	bioengineering	11	110		158	220	110	1537	342	227	312	8	232	503	164	1274	831	1144	115	520	197	1372	11	25	53	59	237	73	128	387	51
2017-05	bioinformatics	103	1640		158	220	110	1640	342	227	312	8	232	503	164	1274	831	1144	115	520	197	1372	11	25	53	59	237	73	128	387	51
2017-05	biophysics	44	386		158	220	110	1640	386	227	312	8	232	503	164	1274	831	1144	115	520	197	1372	11	25	53	59	237	73	128	387	51
2017-05	cancer biology	21	248		158	220	110	1640	386	248	312	8	232	503	164	1274	831	1144	115	520	197	1372	11	25	53	59	237	73	128	387	51
2017-05	cell biology	46	358		158	220	110	1640	386	248	358	8	232	503	164	1274	831	1144	115	520	197	1372	11	25	53	59	237	73	128	387	51
2017-05	clinical trials	1	9		158	220	110	1640	386	248	358	9	232	503	164	1274	831	1144	115	520	197	1372	11	25	53	59	237	73	128	387	51
2017-05	developmental biology	32	264		158	220	110	1640	386	248	358	9	264	503	164	1274	831	1144	115	520	197	1372	11	25	53	59	237	73	128	387	51
2017-05	ecology	27	530		158	220	110	1640	386	248	358	9	264	530	164	1274	831	1144	115	520	197	1372	11	25	53	59	237	73	128	387	51
2017-05	epidemiology	32	196		158	220	110	1640	386	248	358	9	264	530	196	1274	831	1144	115	520	197	1372	11	25	53	59	237	73	128	387	51
2017-05	evolutionary biology	74	1348		158	220	110	1640	386	248	358	9	264	530	196	1348	831	1144	115	520	197	1372	11	25	53	59	237	73	128	387	51
2017-05	genetics	62	893		158	220	110	1640	386	248	358	9	264	530	196	1348	893	1144	115	520	197	1372	11	25	53	59	237	73	128	387	51
2017-05	genomics	72	1216		158	220	110	1640	386	248	358	9	264	530	196	1348	893	1216	115	520	197	1372	11	25	53	59	237	73	128	387	51
2017-05	immunology	10	125		158	220	110	1640	386	248	358	9	264	530	196	1348	893	1216	125	520	197	1372	11	25	53	59	237	73	128	387	51
2017-05	microbiology	72	592		158	220	110	1640	386	248	358	9	264	530	196	1348	893	1216	125	592	197	1372	11	25	53	59	237	73	128	387	51
2017-05	molecular biology	24	221		158	220	110	1640	386	248	358	9	264	530	196	1348	893	1216	125	592	221	1372	11	25	53	59	237	73	128	387	51
2017-05	neuroscience	182	1554		158	220	110	1640	386	248	358	9	264	530	196	1348	893	1216	125	592	221	1554	11	25	53	59	237	73	128	387	51
2017-05	pathology	4	29		158	220	110	1640	386	248	358	9	264	530	196	1348	893	1216	125	592	221	1554	11	29	53	59	237	73	128	387	51
2017-05	pharmacology and toxicology	6	59		158	220	110	1640	386	248	358	9	264	530	196	1348	893	1216	125	592	221	1554	11	29	59	59	237	73	128	387	51
2017-05	physiology	6	65		158	220	110	1640	386	248	358	9	264	530	196	1348	893	1216	125	592	221	1554	11	29	59	65	237	73	128	387	51
2017-05	plant biology	30	267		158	220	110	1640	386	248	358	9	264	530	196	1348	893	1216	125	592	221	1554	11	29	59	65	267	73	128	387	51
2017-05	scientific communication and education	14	87		158	220	110	1640	386	248	358	9	264	530	196	1348	893	1216	125	592	221	1554	11	29	59	65	267	87	128	387	51
2017-05	synthetic biology	11	139		158	220	110	1640	386	248	358	9	264	530	196	1348	893	1216	125	592	221	1554	11	29	59	65	267	87	139	387	51
2017-05	systems biology	36	423		158	220	110	1640	386	248	358	9	264	530	196	1348	893	1216	125	592	221	1554	11	29	59	65	267	87	139	423	51
2017-05	zoology	4	55		158	220	110	1640	386	248	358	9	264	530	196	1348	893	1216	125	592	221	1554	11	29	59	65	267	87	139	423	55
2017-06	animal behavior and cognition	19	177		177	220	110	1640	386	248	358	9	264	530	196	1348	893	1216	125	592	221	1554	11	29	59	65	267	87	139	423	55
2017-06	biochemistry	45	265		177	265	110	1640	386	248	358	9	264	530	196	1348	893	1216	125	592	221	1554	11	29	59	65	267	87	139	423	55
2017-06	bioengineering	22	132		177	265	132	1640	386	248	358	9	264	530	196	1348	893	1216	125	592	221	1554	11	29	59	65	267	87	139	423	55
2017-06	bioinformatics	111	1751		177	265	132	1751	386	248	358	9	264	530	196	1348	893	1216	125	592	221	1554	11	29	59	65	267	87	139	423	55
2017-06	biophysics	45	431		177	265	132	1751	431	248	358	9	264	530	196	1348	893	1216	125	592	221	1554	11	29	59	65	267	87	139	423	55
2017-06	cancer biology	43	291		177	265	132	1751	431	291	358	9	264	530	196	1348	893	1216	125	592	221	1554	11	29	59	65	267	87	139	423	55
2017-06	cell biology	66	424		177	265	132	1751	431	291	424	9	264	530	196	1348	893	1216	125	592	221	1554	11	29	59	65	267	87	139	423	55
2017-06	clinical trials	2	11		177	265	132	1751	431	291	424	11	264	530	196	1348	893	1216	125	592	221	1554	11	29	59	65	267	87	139	423	55
2017-06	developmental biology	30	294		177	265	132	1751	431	291	424	11	294	530	196	1348	893	1216	125	592	221	1554	11	29	59	65	267	87	139	423	55
2017-06	ecology	38	568		177	265	132	1751	431	291	424	11	294	568	196	1348	893	1216	125	592	221	1554	11	29	59	65	267	87	139	423	55
2017-06	epidemiology	26	222		177	265	132	1751	431	291	424	11	294	568	222	1348	893	1216	125	592	221	1554	11	29	59	65	267	87	139	423	55
2017-06	evolutionary biology	82	1430		177	265	132	1751	431	291	424	11	294	568	222	1430	893	1216	125	592	221	1554	11	29	59	65	267	87	139	423	55
2017-06	genetics	72	965		177	265	132	1751	431	291	424	11	294	568	222	1430	965	1216	125	592	221	1554	11	29	59	65	267	87	139	423	55
2017-06	genomics	77	1293		177	265	132	1751	431	291	424	11	294	568	222	1430	965	1293	125	592	221	1554	11	29	59	65	267	87	139	423	55
2017-06	immunology	16	141		177	265	132	1751	431	291	424	11	294	568	222	1430	965	1293	141	592	221	1554	11	29	59	65	267	87	139	423	55
2017-06	microbiology	63	655		177	265	132	1751	431	291	424	11	294	568	222	1430	965	1293	141	655	221	1554	11	29	59	65	267	87	139	423	55
2017-06	molecular biology	23	244		177	265	132	1751	431	291	424	11	294	568	222	1430	965	1293	141	655	244	1554	11	29	59	65	267	87	139	423	55
2017-06	neuroscience	204	1758		177	265	132	1751	431	291	424	11	294	568	222	1430	965	1293	141	655	244	1758	11	29	59	65	267	87	139	423	55
2017-06	paleontology	1	12		177	265	132	1751	431	291	424	11	294	568	222	1430	965	1293	141	655	244	1758	12	29	59	65	267	87	139	423	55
2017-06	pathology	5	34		177	265	132	1751	431	291	424	11	294	568	222	1430	965	1293	141	655	244	1758	12	34	59	65	267	87	139	423	55
2017-06	pharmacology and toxicology	6	65		177	265	132	1751	431	291	424	11	294	568	222	1430	965	1293	141	655	244	1758	12	34	65	65	267	87	139	423	55
2017-06	physiology	19	84		177	265	132	1751	431	291	424	11	294	568	222	1430	965	1293	141	655	244	1758	12	34	65	84	267	87	139	423	55
2017-06	plant biology	27	294		177	265	132	1751	431	291	424	11	294	568	222	1430	965	1293	141	655	244	1758	12	34	65	84	294	87	139	423	55
2017-06	scientific communication and education	4	91		177	265	132	1751	431	291	424	11	294	568	222	1430	965	1293	141	655	244	1758	12	34	65	84	294	91	139	423	55
2017-06	synthetic biology	13	152		177	265	132	1751	431	291	424	11	294	568	222	1430	965	1293	141	655	244	1758	12	34	65	84	294	91	152	423	55
2017-06	systems biology	37	460		177	265	132	1751	431	291	424	11	294	568	222	1430	965	1293	141	655	244	1758	12	34	65	84	294	91	152	460	55
2017-06	zoology	1	56		177	265	132	1751	431	291	424	11	294	568	222	1430	965	1293	141	655	244	1758	12	34	65	84	294	91	152	460	56
2017-07	animal behavior and cognition	16	193		193	265	132	1751	431	291	424	11	294	568	222	1430	965	1293	141	655	244	1758	12	34	65	84	294	91	152	460	56
2017-07	biochemistry	33	298		193	298	132	1751	431	291	424	11	294	568	222	1430	965	1293	141	655	244	1758	12	34	65	84	294	91	152	460	56
2017-07	bioengineering	22	154		193	298	154	1751	431	291	424	11	294	568	222	1430	965	1293	141	655	244	1758	12	34	65	84	294	91	152	460	56
2017-07	bioinformatics	113	1864		193	298	154	1864	431	291	424	11	294	568	222	1430	965	1293	141	655	244	1758	12	34	65	84	294	91	152	460	56
2017-07	biophysics	37	468		193	298	154	1864	468	291	424	11	294	568	222	1430	965	1293	141	655	244	1758	12	34	65	84	294	91	152	460	56
2017-07	cancer biology	26	317		193	298	154	1864	468	317	424	11	294	568	222	1430	965	1293	141	655	244	1758	12	34	65	84	294	91	152	460	56
2017-07	cell biology	44	468		193	298	154	1864	468	317	468	11	294	568	222	1430	965	1293	141	655	244	1758	12	34	65	84	294	91	152	460	56
2017-07	developmental biology	22	316		193	298	154	1864	468	317	468	11	316	568	222	1430	965	1293	141	655	244	1758	12	34	65	84	294	91	152	460	56
2017-07	ecology	49	617		193	298	154	1864	468	317	468	11	316	617	222	1430	965	1293	141	655	244	1758	12	34	65	84	294	91	152	460	56
2017-07	epidemiology	20	242		193	298	154	1864	468	317	468	11	316	617	242	1430	965	1293	141	655	244	1758	12	34	65	84	294	91	152	460	56
2017-07	evolutionary biology	81	1511		193	298	154	1864	468	317	468	11	316	617	242	1511	965	1293	141	655	244	1758	12	34	65	84	294	91	152	460	56
2017-07	genetics	61	1026		193	298	154	1864	468	317	468	11	316	617	242	1511	1026	1293	141	655	244	1758	12	34	65	84	294	91	152	460	56
2017-07	genomics	78	1371		193	298	154	1864	468	317	468	11	316	617	242	1511	1026	1371	141	655	244	1758	12	34	65	84	294	91	152	460	56
2017-07	immunology	15	156		193	298	154	1864	468	317	468	11	316	617	242	1511	1026	1371	156	655	244	1758	12	34	65	84	294	91	152	460	56
2017-07	microbiology	57	712		193	298	154	1864	468	317	468	11	316	617	242	1511	1026	1371	156	712	244	1758	12	34	65	84	294	91	152	460	56
2017-07	molecular biology	30	274		193	298	154	1864	468	317	468	11	316	617	242	1511	1026	1371	156	712	274	1758	12	34	65	84	294	91	152	460	56
2017-07	neuroscience	173	1931		193	298	154	1864	468	317	468	11	316	617	242	1511	1026	1371	156	712	274	1931	12	34	65	84	294	91	152	460	56
2017-07	paleontology	1	13		193	298	154	1864	468	317	468	11	316	617	242	1511	1026	1371	156	712	274	1931	13	34	65	84	294	91	152	460	56
2017-07	pathology	4	38		193	298	154	1864	468	317	468	11	316	617	242	1511	1026	1371	156	712	274	1931	13	38	65	84	294	91	152	460	56
2017-07	pharmacology and toxicology	12	77		193	298	154	1864	468	317	468	11	316	617	242	1511	1026	1371	156	712	274	1931	13	38	77	84	294	91	152	460	56
2017-07	physiology	8	92		193	298	154	1864	468	317	468	11	316	617	242	1511	1026	1371	156	712	274	1931	13	38	77	92	294	91	152	460	56
2017-07	plant biology	27	321		193	298	154	1864	468	317	468	11	316	617	242	1511	1026	1371	156	712	274	1931	13	38	77	92	321	91	152	460	56
2017-07	scientific communication and education	4	95		193	298	154	1864	468	317	468	11	316	617	242	1511	1026	1371	156	712	274	1931	13	38	77	92	321	95	152	460	56
2017-07	synthetic biology	13	165		193	298	154	1864	468	317	468	11	316	617	242	1511	1026	1371	156	712	274	1931	13	38	77	92	321	95	165	460	56
2017-07	systems biology	27	487		193	298	154	1864	468	317	468	11	316	617	242	1511	1026	1371	156	712	274	1931	13	38	77	92	321	95	165	487	56
2017-07	zoology	3	59		193	298	154	1864	468	317	468	11	316	617	242	1511	1026	1371	156	712	274	1931	13	38	77	92	321	95	165	487	59
2017-08	animal behavior and cognition	16	209		209	298	154	1864	468	317	468	11	316	617	242	1511	1026	1371	156	712	274	1931	13	38	77	92	321	95	165	487	59
2017-08	biochemistry	33	331		209	331	154	1864	468	317	468	11	316	617	242	1511	1026	1371	156	712	274	1931	13	38	77	92	321	95	165	487	59
2017-08	bioengineering	12	166		209	331	166	1864	468	317	468	11	316	617	242	1511	1026	1371	156	712	274	1931	13	38	77	92	321	95	165	487	59
2017-08	bioinformatics	122	1986		209	331	166	1986	468	317	468	11	316	617	242	1511	1026	1371	156	712	274	1931	13	38	77	92	321	95	165	487	59
2017-08	biophysics	39	507		209	331	166	1986	507	317	468	11	316	617	242	1511	1026	1371	156	712	274	1931	13	38	77	92	321	95	165	487	59
2017-08	cancer biology	35	352		209	331	166	1986	507	352	468	11	316	617	242	1511	1026	1371	156	712	274	1931	13	38	77	92	321	95	165	487	59
2017-08	cell biology	49	517		209	331	166	1986	507	352	517	11	316	617	242	1511	1026	1371	156	712	274	1931	13	38	77	92	321	95	165	487	59
2017-08	clinical trials	1	12		209	331	166	1986	507	352	517	12	316	617	242	1511	1026	1371	156	712	274	1931	13	38	77	92	321	95	165	487	59
2017-08	developmental biology	36	352		209	331	166	1986	507	352	517	12	352	617	242	1511	1026	1371	156	712	274	1931	13	38	77	92	321	95	165	487	59
2017-08	ecology	32	649		209	331	166	1986	507	352	517	12	352	649	242	1511	1026	1371	156	712	274	1931	13	38	77	92	321	95	165	487	59
2017-08	epidemiology	24	266		209	331	166	1986	507	352	517	12	352	649	266	1511	1026	1371	156	712	274	1931	13	38	77	92	321	95	165	487	59
2017-08	evolutionary biology	62	1573		209	331	166	1986	507	352	517	12	352	649	266	1573	1026	1371	156	712	274	1931	13	38	77	92	321	95	165	487	59
2017-08	genetics	57	1083		209	331	166	1986	507	352	517	12	352	649	266	1573	1083	1371	156	712	274	1931	13	38	77	92	321	95	165	487	59
2017-08	genomics	74	1445		209	331	166	1986	507	352	517	12	352	649	266	1573	1083	1445	156	712	274	1931	13	38	77	92	321	95	165	487	59
2017-08	immunology	13	169		209	331	166	1986	507	352	517	12	352	649	266	1573	1083	1445	169	712	274	1931	13	38	77	92	321	95	165	487	59
2017-08	microbiology	81	793		209	331	166	1986	507	352	517	12	352	649	266	1573	1083	1445	169	793	274	1931	13	38	77	92	321	95	165	487	59
2017-08	molecular biology	33	307		209	331	166	1986	507	352	517	12	352	649	266	1573	1083	1445	169	793	307	1931	13	38	77	92	321	95	165	487	59
2017-08	neuroscience	179	2110		209	331	166	1986	507	352	517	12	352	649	266	1573	1083	1445	169	793	307	2110	13	38	77	92	321	95	165	487	59
2017-08	paleontology	1	14		209	331	166	1986	507	352	517	12	352	649	266	1573	1083	1445	169	793	307	2110	14	38	77	92	321	95	165	487	59
2017-08	pathology	1	39		209	331	166	1986	507	352	517	12	352	649	266	1573	1083	1445	169	793	307	2110	14	39	77	92	321	95	165	487	59
2017-08	pharmacology and toxicology	4	81		209	331	166	1986	507	352	517	12	352	649	266	1573	1083	1445	169	793	307	2110	14	39	81	92	321	95	165	487	59
2017-08	physiology	9	101		209	331	166	1986	507	352	517	12	352	649	266	1573	1083	1445	169	793	307	2110	14	39	81	101	321	95	165	487	59
2017-08	plant biology	27	348		209	331	166	1986	507	352	517	12	352	649	266	1573	1083	1445	169	793	307	2110	14	39	81	101	348	95	165	487	59
2017-08	scientific communication and education	5	100		209	331	166	1986	507	352	517	12	352	649	266	1573	1083	1445	169	793	307	2110	14	39	81	101	348	100	165	487	59
2017-08	synthetic biology	10	175		209	331	166	1986	507	352	517	12	352	649	266	1573	1083	1445	169	793	307	2110	14	39	81	101	348	100	175	487	59
2017-08	systems biology	27	514		209	331	166	1986	507	352	517	12	352	649	266	1573	1083	1445	169	793	307	2110	14	39	81	101	348	100	175	514	59
2017-08	zoology	6	65		209	331	166	1986	507	352	517	12	352	649	266	1573	1083	1445	169	793	307	2110	14	39	81	101	348	100	175	514	65
2017-09	animal behavior and cognition	19	228		228	331	166	1986	507	352	517	12	352	649	266	1573	1083	1445	169	793	307	2110	14	39	81	101	348	100	175	514	65
2017-09	biochemistry	23	354		228	354	166	1986	507	352	517	12	352	649	266	1573	1083	1445	169	793	307	2110	14	39	81	101	348	100	175	514	65
2017-09	bioengineering	18	184		228	354	184	1986	507	352	517	12	352	649	266	1573	1083	1445	169	793	307	2110	14	39	81	101	348	100	175	514	65
2017-09	bioinformatics	112	2098		228	354	184	2098	507	352	517	12	352	649	266	1573	1083	1445	169	793	307	2110	14	39	81	101	348	100	175	514	65
2017-09	biophysics	43	550		228	354	184	2098	550	352	517	12	352	649	266	1573	1083	1445	169	793	307	2110	14	39	81	101	348	100	175	514	65
2017-09	cancer biology	41	393		228	354	184	2098	550	393	517	12	352	649	266	1573	1083	1445	169	793	307	2110	14	39	81	101	348	100	175	514	65
2017-09	cell biology	49	566		228	354	184	2098	550	393	566	12	352	649	266	1573	1083	1445	169	793	307	2110	14	39	81	101	348	100	175	514	65
2017-09	developmental biology	22	374		228	354	184	2098	550	393	566	12	374	649	266	1573	1083	1445	169	793	307	2110	14	39	81	101	348	100	175	514	65
2017-09	ecology	51	700		228	354	184	2098	550	393	566	12	374	700	266	1573	1083	1445	169	793	307	2110	14	39	81	101	348	100	175	514	65
2017-09	epidemiology	35	301		228	354	184	2098	550	393	566	12	374	700	301	1573	1083	1445	169	793	307	2110	14	39	81	101	348	100	175	514	65
2017-09	evolutionary biology	61	1634		228	354	184	2098	550	393	566	12	374	700	301	1634	1083	1445	169	793	307	2110	14	39	81	101	348	100	175	514	65
2017-09	genetics	81	1164		228	354	184	2098	550	393	566	12	374	700	301	1634	1164	1445	169	793	307	2110	14	39	81	101	348	100	175	514	65
2017-09	genomics	76	1521		228	354	184	2098	550	393	566	12	374	700	301	1634	1164	1521	169	793	307	2110	14	39	81	101	348	100	175	514	65
2017-09	immunology	20	189		228	354	184	2098	550	393	566	12	374	700	301	1634	1164	1521	189	793	307	2110	14	39	81	101	348	100	175	514	65
2017-09	microbiology	58	851		228	354	184	2098	550	393	566	12	374	700	301	1634	1164	1521	189	851	307	2110	14	39	81	101	348	100	175	514	65
2017-09	molecular biology	30	337		228	354	184	2098	550	393	566	12	374	700	301	1634	1164	1521	189	851	337	2110	14	39	81	101	348	100	175	514	65
2017-09	neuroscience	212	2322		228	354	184	2098	550	393	566	12	374	700	301	1634	1164	1521	189	851	337	2322	14	39	81	101	348	100	175	514	65
2017-09	paleontology	1	15		228	354	184	2098	550	393	566	12	374	700	301	1634	1164	1521	189	851	337	2322	15	39	81	101	348	100	175	514	65
2017-09	pathology	5	44		228	354	184	2098	550	393	566	12	374	700	301	1634	1164	1521	189	851	337	2322	15	44	81	101	348	100	175	514	65
2017-09	pharmacology and toxicology	15	96		228	354	184	2098	550	393	566	12	374	700	301	1634	1164	1521	189	851	337	2322	15	44	96	101	348	100	175	514	65
2017-09	physiology	17	118		228	354	184	2098	550	393	566	12	374	700	301	1634	1164	1521	189	851	337	2322	15	44	96	118	348	100	175	514	65
2017-09	plant biology	23	371		228	354	184	2098	550	393	566	12	374	700	301	1634	1164	1521	189	851	337	2322	15	44	96	118	371	100	175	514	65
2017-09	scientific communication and education	3	103		228	354	184	2098	550	393	566	12	374	700	301	1634	1164	1521	189	851	337	2322	15	44	96	118	371	103	175	514	65
2017-09	synthetic biology	11	186		228	354	184	2098	550	393	566	12	374	700	301	1634	1164	1521	189	851	337	2322	15	44	96	118	371	103	186	514	65
2017-09	systems biology	30	544		228	354	184	2098	550	393	566	12	374	700	301	1634	1164	1521	189	851	337	2322	15	44	96	118	371	103	186	544	65
2017-09	zoology	3	68		228	354	184	2098	550	393	566	12	374	700	301	1634	1164	1521	189	851	337	2322	15	44	96	118	371	103	186	544	68
2017-10	animal behavior and cognition	26	254		254	354	184	2098	550	393	566	12	374	700	301	1634	1164	1521	189	851	337	2322	15	44	96	118	371	103	186	544	68
2017-10	biochemistry	33	387		254	387	184	2098	550	393	566	12	374	700	301	1634	1164	1521	189	851	337	2322	15	44	96	118	371	103	186	544	68
2017-10	bioengineering	16	200		254	387	200	2098	550	393	566	12	374	700	301	1634	1164	1521	189	851	337	2322	15	44	96	118	371	103	186	544	68
2017-10	bioinformatics	124	2222		254	387	200	2222	550	393	566	12	374	700	301	1634	1164	1521	189	851	337	2322	15	44	96	118	371	103	186	544	68
2017-10	biophysics	66	616		254	387	200	2222	616	393	566	12	374	700	301	1634	1164	1521	189	851	337	2322	15	44	96	118	371	103	186	544	68
2017-10	cancer biology	43	436		254	387	200	2222	616	436	566	12	374	700	301	1634	1164	1521	189	851	337	2322	15	44	96	118	371	103	186	544	68
2017-10	cell biology	63	629		254	387	200	2222	616	436	629	12	374	700	301	1634	1164	1521	189	851	337	2322	15	44	96	118	371	103	186	544	68
2017-10	clinical trials	1	13		254	387	200	2222	616	436	629	13	374	700	301	1634	1164	1521	189	851	337	2322	15	44	96	118	371	103	186	544	68
2017-10	developmental biology	39	413		254	387	200	2222	616	436	629	13	413	700	301	1634	1164	1521	189	851	337	2322	15	44	96	118	371	103	186	544	68
2017-10	ecology	36	736		254	387	200	2222	616	436	629	13	413	736	301	1634	1164	1521	189	851	337	2322	15	44	96	118	371	103	186	544	68
2017-10	epidemiology	37	338		254	387	200	2222	616	436	629	13	413	736	338	1634	1164	1521	189	851	337	2322	15	44	96	118	371	103	186	544	68
2017-10	evolutionary biology	81	1715		254	387	200	2222	616	436	629	13	413	736	338	1715	1164	1521	189	851	337	2322	15	44	96	118	371	103	186	544	68
2017-10	genetics	83	1247		254	387	200	2222	616	436	629	13	413	736	338	1715	1247	1521	189	851	337	2322	15	44	96	118	371	103	186	544	68
2017-10	genomics	84	1605		254	387	200	2222	616	436	629	13	413	736	338	1715	1247	1605	189	851	337	2322	15	44	96	118	371	103	186	544	68
2017-10	immunology	22	211		254	387	200	2222	616	436	629	13	413	736	338	1715	1247	1605	211	851	337	2322	15	44	96	118	371	103	186	544	68
2017-10	microbiology	71	922		254	387	200	2222	616	436	629	13	413	736	338	1715	1247	1605	211	922	337	2322	15	44	96	118	371	103	186	544	68
2017-10	molecular biology	24	361		254	387	200	2222	616	436	629	13	413	736	338	1715	1247	1605	211	922	361	2322	15	44	96	118	371	103	186	544	68
2017-10	neuroscience	246	2568		254	387	200	2222	616	436	629	13	413	736	338	1715	1247	1605	211	922	361	2568	15	44	96	118	371	103	186	544	68
2017-10	paleontology	2	17		254	387	200	2222	616	436	629	13	413	736	338	1715	1247	1605	211	922	361	2568	17	44	96	118	371	103	186	544	68
2017-10	pathology	2	46		254	387	200	2222	616	436	629	13	413	736	338	1715	1247	1605	211	922	361	2568	17	46	96	118	371	103	186	544	68
2017-10	pharmacology and toxicology	7	103		254	387	200	2222	616	436	629	13	413	736	338	1715	1247	1605	211	922	361	2568	17	46	103	118	371	103	186	544	68
2017-10	physiology	9	127		254	387	200	2222	616	436	629	13	413	736	338	1715	1247	1605	211	922	361	2568	17	46	103	127	371	103	186	544	68
2017-10	plant biology	36	407		254	387	200	2222	616	436	629	13	413	736	338	1715	1247	1605	211	922	361	2568	17	46	103	127	407	103	186	544	68
2017-10	scientific communication and education	2	105		254	387	200	2222	616	436	629	13	413	736	338	1715	1247	1605	211	922	361	2568	17	46	103	127	407	105	186	544	68
2017-10	synthetic biology	9	195		254	387	200	2222	616	436	629	13	413	736	338	1715	1247	1605	211	922	361	2568	17	46	103	127	407	105	195	544	68
2017-10	systems biology	33	577		254	387	200	2222	616	436	629	13	413	736	338	1715	1247	1605	211	922	361	2568	17	46	103	127	407	105	195	577	68
2017-10	zoology	10	78		254	387	200	2222	616	436	629	13	413	736	338	1715	1247	1605	211	922	361	2568	17	46	103	127	407	105	195	577	78
2017-11	animal behavior and cognition	13	267		267	387	200	2222	616	436	629	13	413	736	338	1715	1247	1605	211	922	361	2568	17	46	103	127	407	105	195	577	78
2017-11	biochemistry	30	417		267	417	200	2222	616	436	629	13	413	736	338	1715	1247	1605	211	922	361	2568	17	46	103	127	407	105	195	577	78
2017-11	bioengineering	15	215		267	417	215	2222	616	436	629	13	413	736	338	1715	1247	1605	211	922	361	2568	17	46	103	127	407	105	195	577	78
2017-11	bioinformatics	151	2373		267	417	215	2373	616	436	629	13	413	736	338	1715	1247	1605	211	922	361	2568	17	46	103	127	407	105	195	577	78
2017-11	biophysics	36	652		267	417	215	2373	652	436	629	13	413	736	338	1715	1247	1605	211	922	361	2568	17	46	103	127	407	105	195	577	78
2017-11	cancer biology	43	479		267	417	215	2373	652	479	629	13	413	736	338	1715	1247	1605	211	922	361	2568	17	46	103	127	407	105	195	577	78
2017-11	cell biology	58	687		267	417	215	2373	652	479	687	13	413	736	338	1715	1247	1605	211	922	361	2568	17	46	103	127	407	105	195	577	78
2017-11	clinical trials	6	19		267	417	215	2373	652	479	687	19	413	736	338	1715	1247	1605	211	922	361	2568	17	46	103	127	407	105	195	577	78
2017-11	developmental biology	30	443		267	417	215	2373	652	479	687	19	443	736	338	1715	1247	1605	211	922	361	2568	17	46	103	127	407	105	195	577	78
2017-11	ecology	51	787		267	417	215	2373	652	479	687	19	443	787	338	1715	1247	1605	211	922	361	2568	17	46	103	127	407	105	195	577	78
2017-11	epidemiology	32	370		267	417	215	2373	652	479	687	19	443	787	370	1715	1247	1605	211	922	361	2568	17	46	103	127	407	105	195	577	78
2017-11	evolutionary biology	81	1796		267	417	215	2373	652	479	687	19	443	787	370	1796	1247	1605	211	922	361	2568	17	46	103	127	407	105	195	577	78
2017-11	genetics	78	1325		267	417	215	2373	652	479	687	19	443	787	370	1796	1325	1605	211	922	361	2568	17	46	103	127	407	105	195	577	78
2017-11	genomics	80	1685		267	417	215	2373	652	479	687	19	443	787	370	1796	1325	1685	211	922	361	2568	17	46	103	127	407	105	195	577	78
2017-11	immunology	31	242		267	417	215	2373	652	479	687	19	443	787	370	1796	1325	1685	242	922	361	2568	17	46	103	127	407	105	195	577	78
2017-11	microbiology	78	1000		267	417	215	2373	652	479	687	19	443	787	370	1796	1325	1685	242	1000	361	2568	17	46	103	127	407	105	195	577	78
2017-11	molecular biology	36	397		267	417	215	2373	652	479	687	19	443	787	370	1796	1325	1685	242	1000	397	2568	17	46	103	127	407	105	195	577	78
2017-11	neuroscience	241	2809		267	417	215	2373	652	479	687	19	443	787	370	1796	1325	1685	242	1000	397	2809	17	46	103	127	407	105	195	577	78
2017-11	paleontology	3	20		267	417	215	2373	652	479	687	19	443	787	370	1796	1325	1685	242	1000	397	2809	20	46	103	127	407	105	195	577	78
2017-11	pathology	5	51		267	417	215	2373	652	479	687	19	443	787	370	1796	1325	1685	242	1000	397	2809	20	51	103	127	407	105	195	577	78
2017-11	pharmacology and toxicology	3	106		267	417	215	2373	652	479	687	19	443	787	370	1796	1325	1685	242	1000	397	2809	20	51	106	127	407	105	195	577	78
2017-11	physiology	10	137		267	417	215	2373	652	479	687	19	443	787	370	1796	1325	1685	242	1000	397	2809	20	51	106	137	407	105	195	577	78
2017-11	plant biology	26	433		267	417	215	2373	652	479	687	19	443	787	370	1796	1325	1685	242	1000	397	2809	20	51	106	137	433	105	195	577	78
2017-11	scientific communication and education	6	111		267	417	215	2373	652	479	687	19	443	787	370	1796	1325	1685	242	1000	397	2809	20	51	106	137	433	111	195	577	78
2017-11	synthetic biology	19	214		267	417	215	2373	652	479	687	19	443	787	370	1796	1325	1685	242	1000	397	2809	20	51	106	137	433	111	214	577	78
2017-11	systems biology	30	607		267	417	215	2373	652	479	687	19	443	787	370	1796	1325	1685	242	1000	397	2809	20	51	106	137	433	111	214	607	78
2017-11	zoology	4	82		267	417	215	2373	652	479	687	19	443	787	370	1796	1325	1685	242	1000	397	2809	20	51	106	137	433	111	214	607	82
2017-12	animal behavior and cognition	16	283		283	417	215	2373	652	479	687	19	443	787	370	1796	1325	1685	242	1000	397	2809	20	51	106	137	433	111	214	607	82
2017-12	biochemistry	24	441		283	441	215	2373	652	479	687	19	443	787	370	1796	1325	1685	242	1000	397	2809	20	51	106	137	433	111	214	607	82
2017-12	bioengineering	18	233		283	441	233	2373	652	479	687	19	443	787	370	1796	1325	1685	242	1000	397	2809	20	51	106	137	433	111	214	607	82
2017-12	bioinformatics	112	2485		283	441	233	2485	652	479	687	19	443	787	370	1796	1325	1685	242	1000	397	2809	20	51	106	137	433	111	214	607	82
2017-12	biophysics	56	708		283	441	233	2485	708	479	687	19	443	787	370	1796	1325	1685	242	1000	397	2809	20	51	106	137	433	111	214	607	82
2017-12	cancer biology	36	515		283	441	233	2485	708	515	687	19	443	787	370	1796	1325	1685	242	1000	397	2809	20	51	106	137	433	111	214	607	82
2017-12	cell biology	52	739		283	441	233	2485	708	515	739	19	443	787	370	1796	1325	1685	242	1000	397	2809	20	51	106	137	433	111	214	607	82
2017-12	clinical trials	3	22		283	441	233	2485	708	515	739	22	443	787	370	1796	1325	1685	242	1000	397	2809	20	51	106	137	433	111	214	607	82
2017-12	developmental biology	34	477		283	441	233	2485	708	515	739	22	477	787	370	1796	1325	1685	242	1000	397	2809	20	51	106	137	433	111	214	607	82
2017-12	ecology	40	827		283	441	233	2485	708	515	739	22	477	827	370	1796	1325	1685	242	1000	397	2809	20	51	106	137	433	111	214	607	82
2017-12	epidemiology	30	400		283	441	233	2485	708	515	739	22	477	827	400	1796	1325	1685	242	1000	397	2809	20	51	106	137	433	111	214	607	82
2017-12	evolutionary biology	84	1880		283	441	233	2485	708	515	739	22	477	827	400	1880	1325	1685	242	1000	397	2809	20	51	106	137	433	111	214	607	82
2017-12	genetics	63	1388		283	441	233	2485	708	515	739	22	477	827	400	1880	1388	1685	242	1000	397	2809	20	51	106	137	433	111	214	607	82
2017-12	genomics	80	1765		283	441	233	2485	708	515	739	22	477	827	400	1880	1388	1765	242	1000	397	2809	20	51	106	137	433	111	214	607	82
2017-12	immunology	17	259		283	441	233	2485	708	515	739	22	477	827	400	1880	1388	1765	259	1000	397	2809	20	51	106	137	433	111	214	607	82
2017-12	microbiology	68	1068		283	441	233	2485	708	515	739	22	477	827	400	1880	1388	1765	259	1068	397	2809	20	51	106	137	433	111	214	607	82
2017-12	molecular biology	21	418		283	441	233	2485	708	515	739	22	477	827	400	1880	1388	1765	259	1068	418	2809	20	51	106	137	433	111	214	607	82
2017-12	neuroscience	228	3037		283	441	233	2485	708	515	739	22	477	827	400	1880	1388	1765	259	1068	418	3037	20	51	106	137	433	111	214	607	82
2017-12	paleontology	3	23		283	441	233	2485	708	515	739	22	477	827	400	1880	1388	1765	259	1068	418	3037	23	51	106	137	433	111	214	607	82
2017-12	pathology	1	52		283	441	233	2485	708	515	739	22	477	827	400	1880	1388	1765	259	1068	418	3037	23	52	106	137	433	111	214	607	82
2017-12	pharmacology and toxicology	5	111		283	441	233	2485	708	515	739	22	477	827	400	1880	1388	1765	259	1068	418	3037	23	52	111	137	433	111	214	607	82
2017-12	physiology	12	149		283	441	233	2485	708	515	739	22	477	827	400	1880	1388	1765	259	1068	418	3037	23	52	111	149	433	111	214	607	82
2017-12	plant biology	36	469		283	441	233	2485	708	515	739	22	477	827	400	1880	1388	1765	259	1068	418	3037	23	52	111	149	469	111	214	607	82
2017-12	scientific communication and education	5	116		283	441	233	2485	708	515	739	22	477	827	400	1880	1388	1765	259	1068	418	3037	23	52	111	149	469	116	214	607	82
2017-12	synthetic biology	7	221		283	441	233	2485	708	515	739	22	477	827	400	1880	1388	1765	259	1068	418	3037	23	52	111	149	469	116	221	607	82
2017-12	systems biology	42	649		283	441	233	2485	708	515	739	22	477	827	400	1880	1388	1765	259	1068	418	3037	23	52	111	149	469	116	221	649	82
2017-12	zoology	6	88		283	441	233	2485	708	515	739	22	477	827	400	1880	1388	1765	259	1068	418	3037	23	52	111	149	469	116	221	649	88
2018-01	animal behavior and cognition	16	299		299	441	233	2485	708	515	739	22	477	827	400	1880	1388	1765	259	1068	418	3037	23	52	111	149	469	116	221	649	88
2018-01	biochemistry	52	493		299	493	233	2485	708	515	739	22	477	827	400	1880	1388	1765	259	1068	418	3037	23	52	111	149	469	116	221	649	88
2018-01	bioengineering	21	254		299	493	254	2485	708	515	739	22	477	827	400	1880	1388	1765	259	1068	418	3037	23	52	111	149	469	116	221	649	88
2018-01	bioinformatics	129	2614		299	493	254	2614	708	515	739	22	477	827	400	1880	1388	1765	259	1068	418	3037	23	52	111	149	469	116	221	649	88
2018-01	biophysics	43	751		299	493	254	2614	751	515	739	22	477	827	400	1880	1388	1765	259	1068	418	3037	23	52	111	149	469	116	221	649	88
2018-01	cancer biology	46	561		299	493	254	2614	751	561	739	22	477	827	400	1880	1388	1765	259	1068	418	3037	23	52	111	149	469	116	221	649	88
2018-01	cell biology	60	799		299	493	254	2614	751	561	799	22	477	827	400	1880	1388	1765	259	1068	418	3037	23	52	111	149	469	116	221	649	88
2018-01	clinical trials	2	24		299	493	254	2614	751	561	799	24	477	827	400	1880	1388	1765	259	1068	418	3037	23	52	111	149	469	116	221	649	88
2018-01	developmental biology	38	515		299	493	254	2614	751	561	799	24	515	827	400	1880	1388	1765	259	1068	418	3037	23	52	111	149	469	116	221	649	88
2018-01	ecology	32	859		299	493	254	2614	751	561	799	24	515	859	400	1880	1388	1765	259	1068	418	3037	23	52	111	149	469	116	221	649	88
2018-01	epidemiology	26	426		299	493	254	2614	751	561	799	24	515	859	426	1880	1388	1765	259	1068	418	3037	23	52	111	149	469	116	221	649	88
2018-01	evolutionary biology	89	1969		299	493	254	2614	751	561	799	24	515	859	426	1969	1388	1765	259	1068	418	3037	23	52	111	149	469	116	221	649	88
2018-01	genetics	61	1449		299	493	254	2614	751	561	799	24	515	859	426	1969	1449	1765	259	1068	418	3037	23	52	111	149	469	116	221	649	88
2018-01	genomics	84	1849		299	493	254	2614	751	561	799	24	515	859	426	1969	1449	1849	259	1068	418	3037	23	52	111	149	469	116	221	649	88
2018-01	immunology	25	284		299	493	254	2614	751	561	799	24	515	859	426	1969	1449	1849	284	1068	418	3037	23	52	111	149	469	116	221	649	88
2018-01	microbiology	81	1149		299	493	254	2614	751	561	799	24	515	859	426	1969	1449	1849	284	1149	418	3037	23	52	111	149	469	116	221	649	88
2018-01	molecular biology	37	455		299	493	254	2614	751	561	799	24	515	859	426	1969	1449	1849	284	1149	455	3037	23	52	111	149	469	116	221	649	88
2018-01	neuroscience	256	3293		299	493	254	2614	751	561	799	24	515	859	426	1969	1449	1849	284	1149	455	3293	23	52	111	149	469	116	221	649	88
2018-01	paleontology	1	24		299	493	254	2614	751	561	799	24	515	859	426	1969	1449	1849	284	1149	455	3293	24	52	111	149	469	116	221	649	88
2018-01	pathology	5	57		299	493	254	2614	751	561	799	24	515	859	426	1969	1449	1849	284	1149	455	3293	24	57	111	149	469	116	221	649	88
2018-01	pharmacology and toxicology	4	115		299	493	254	2614	751	561	799	24	515	859	426	1969	1449	1849	284	1149	455	3293	24	57	115	149	469	116	221	649	88
2018-01	physiology	15	164		299	493	254	2614	751	561	799	24	515	859	426	1969	1449	1849	284	1149	455	3293	24	57	115	164	469	116	221	649	88
2018-01	plant biology	50	519		299	493	254	2614	751	561	799	24	515	859	426	1969	1449	1849	284	1149	455	3293	24	57	115	164	519	116	221	649	88
2018-01	scientific communication and education	8	124		299	493	254	2614	751	561	799	24	515	859	426	1969	1449	1849	284	1149	455	3293	24	57	115	164	519	124	221	649	88
2018-01	synthetic biology	11	232		299	493	254	2614	751	561	799	24	515	859	426	1969	1449	1849	284	1149	455	3293	24	57	115	164	519	124	232	649	88
2018-01	systems biology	50	699		299	493	254	2614	751	561	799	24	515	859	426	1969	1449	1849	284	1149	455	3293	24	57	115	164	519	124	232	699	88
2018-01	zoology	5	93		299	493	254	2614	751	561	799	24	515	859	426	1969	1449	1849	284	1149	455	3293	24	57	115	164	519	124	232	699	93
2018-02	animal behavior and cognition	29	328		328	493	254	2614	751	561	799	24	515	859	426	1969	1449	1849	284	1149	455	3293	24	57	115	164	519	124	232	699	93
2018-02	biochemistry	30	523		328	523	254	2614	751	561	799	24	515	859	426	1969	1449	1849	284	1149	455	3293	24	57	115	164	519	124	232	699	93
2018-02	bioengineering	34	288		328	523	288	2614	751	561	799	24	515	859	426	1969	1449	1849	284	1149	455	3293	24	57	115	164	519	124	232	699	93
2018-02	bioinformatics	131	2745		328	523	288	2745	751	561	799	24	515	859	426	1969	1449	1849	284	1149	455	3293	24	57	115	164	519	124	232	699	93
2018-02	biophysics	52	803		328	523	288	2745	803	561	799	24	515	859	426	1969	1449	1849	284	1149	455	3293	24	57	115	164	519	124	232	699	93
2018-02	cancer biology	38	599		328	523	288	2745	803	599	799	24	515	859	426	1969	1449	1849	284	1149	455	3293	24	57	115	164	519	124	232	699	93
2018-02	cell biology	68	867		328	523	288	2745	803	599	867	24	515	859	426	1969	1449	1849	284	1149	455	3293	24	57	115	164	519	124	232	699	93
2018-02	clinical trials	3	27		328	523	288	2745	803	599	867	27	515	859	426	1969	1449	1849	284	1149	455	3293	24	57	115	164	519	124	232	699	93
2018-02	developmental biology	47	562		328	523	288	2745	803	599	867	27	562	859	426	1969	1449	1849	284	1149	455	3293	24	57	115	164	519	124	232	699	93
2018-02	ecology	49	908		328	523	288	2745	803	599	867	27	562	908	426	1969	1449	1849	284	1149	455	3293	24	57	115	164	519	124	232	699	93
2018-02	epidemiology	32	458		328	523	288	2745	803	599	867	27	562	908	458	1969	1449	1849	284	1149	455	3293	24	57	115	164	519	124	232	699	93
2018-02	evolutionary biology	63	2032		328	523	288	2745	803	599	867	27	562	908	458	2032	1449	1849	284	1149	455	3293	24	57	115	164	519	124	232	699	93
2018-02	genetics	67	1516		328	523	288	2745	803	599	867	27	562	908	458	2032	1516	1849	284	1149	455	3293	24	57	115	164	519	124	232	699	93
2018-02	genomics	82	1931		328	523	288	2745	803	599	867	27	562	908	458	2032	1516	1931	284	1149	455	3293	24	57	115	164	519	124	232	699	93
2018-02	immunology	26	310		328	523	288	2745	803	599	867	27	562	908	458	2032	1516	1931	310	1149	455	3293	24	57	115	164	519	124	232	699	93
2018-02	microbiology	79	1228		328	523	288	2745	803	599	867	27	562	908	458	2032	1516	1931	310	1228	455	3293	24	57	115	164	519	124	232	699	93
2018-02	molecular biology	42	497		328	523	288	2745	803	599	867	27	562	908	458	2032	1516	1931	310	1228	497	3293	24	57	115	164	519	124	232	699	93
2018-02	neuroscience	217	3510		328	523	288	2745	803	599	867	27	562	908	458	2032	1516	1931	310	1228	497	3510	24	57	115	164	519	124	232	699	93
2018-02	paleontology	1	25		328	523	288	2745	803	599	867	27	562	908	458	2032	1516	1931	310	1228	497	3510	25	57	115	164	519	124	232	699	93
2018-02	pathology	13	70		328	523	288	2745	803	599	867	27	562	908	458	2032	1516	1931	310	1228	497	3510	25	70	115	164	519	124	232	699	93
2018-02	pharmacology and toxicology	7	122		328	523	288	2745	803	599	867	27	562	908	458	2032	1516	1931	310	1228	497	3510	25	70	122	164	519	124	232	699	93
2018-02	physiology	9	173		328	523	288	2745	803	599	867	27	562	908	458	2032	1516	1931	310	1228	497	3510	25	70	122	173	519	124	232	699	93
2018-02	plant biology	40	559		328	523	288	2745	803	599	867	27	562	908	458	2032	1516	1931	310	1228	497	3510	25	70	122	173	559	124	232	699	93
2018-02	scientific communication and education	9	133		328	523	288	2745	803	599	867	27	562	908	458	2032	1516	1931	310	1228	497	3510	25	70	122	173	559	133	232	699	93
2018-02	synthetic biology	7	239		328	523	288	2745	803	599	867	27	562	908	458	2032	1516	1931	310	1228	497	3510	25	70	122	173	559	133	239	699	93
2018-02	systems biology	48	747		328	523	288	2745	803	599	867	27	562	908	458	2032	1516	1931	310	1228	497	3510	25	70	122	173	559	133	239	747	93
2018-02	zoology	5	98		328	523	288	2745	803	599	867	27	562	908	458	2032	1516	1931	310	1228	497	3510	25	70	122	173	559	133	239	747	98
2018-03	animal behavior and cognition	21	349		349	523	288	2745	803	599	867	27	562	908	458	2032	1516	1931	310	1228	497	3510	25	70	122	173	559	133	239	747	98
2018-03	biochemistry	37	560		349	560	288	2745	803	599	867	27	562	908	458	2032	1516	1931	310	1228	497	3510	25	70	122	173	559	133	239	747	98
2018-03	bioengineering	35	323		349	560	323	2745	803	599	867	27	562	908	458	2032	1516	1931	310	1228	497	3510	25	70	122	173	559	133	239	747	98
2018-03	bioinformatics	146	2891		349	560	323	2891	803	599	867	27	562	908	458	2032	1516	1931	310	1228	497	3510	25	70	122	173	559	133	239	747	98
2018-03	biophysics	100	903		349	560	323	2891	903	599	867	27	562	908	458	2032	1516	1931	310	1228	497	3510	25	70	122	173	559	133	239	747	98
2018-03	cancer biology	46	645		349	560	323	2891	903	645	867	27	562	908	458	2032	1516	1931	310	1228	497	3510	25	70	122	173	559	133	239	747	98
2018-03	cell biology	79	946		349	560	323	2891	903	645	946	27	562	908	458	2032	1516	1931	310	1228	497	3510	25	70	122	173	559	133	239	747	98
2018-03	clinical trials	2	29		349	560	323	2891	903	645	946	29	562	908	458	2032	1516	1931	310	1228	497	3510	25	70	122	173	559	133	239	747	98
2018-03	developmental biology	36	598		349	560	323	2891	903	645	946	29	598	908	458	2032	1516	1931	310	1228	497	3510	25	70	122	173	559	133	239	747	98
2018-03	ecology	58	966		349	560	323	2891	903	645	946	29	598	966	458	2032	1516	1931	310	1228	497	3510	25	70	122	173	559	133	239	747	98
2018-03	epidemiology	38	496		349	560	323	2891	903	645	946	29	598	966	496	2032	1516	1931	310	1228	497	3510	25	70	122	173	559	133	239	747	98
2018-03	evolutionary biology	86	2118		349	560	323	2891	903	645	946	29	598	966	496	2118	1516	1931	310	1228	497	3510	25	70	122	173	559	133	239	747	98
2018-03	genetics	84	1600		349	560	323	2891	903	645	946	29	598	966	496	2118	1600	1931	310	1228	497	3510	25	70	122	173	559	133	239	747	98
2018-03	genomics	97	2028		349	560	323	2891	903	645	946	29	598	966	496	2118	1600	2028	310	1228	497	3510	25	70	122	173	559	133	239	747	98
2018-03	immunology	35	345		349	560	323	2891	903	645	946	29	598	966	496	2118	1600	2028	345	1228	497	3510	25	70	122	173	559	133	239	747	98
2018-03	microbiology	94	1322		349	560	323	2891	903	645	946	29	598	966	496	2118	1600	2028	345	1322	497	3510	25	70	122	173	559	133	239	747	98
2018-03	molecular biology	51	548		349	560	323	2891	903	645	946	29	598	966	496	2118	1600	2028	345	1322	548	3510	25	70	122	173	559	133	239	747	98
2018-03	neuroscience	298	3808		349	560	323	2891	903	645	946	29	598	966	496	2118	1600	2028	345	1322	548	3808	25	70	122	173	559	133	239	747	98
2018-03	pathology	6	76		349	560	323	2891	903	645	946	29	598	966	496	2118	1600	2028	345	1322	548	3808	25	76	122	173	559	133	239	747	98
2018-03	pharmacology and toxicology	9	131		349	560	323	2891	903	645	946	29	598	966	496	2118	1600	2028	345	1322	548	3808	25	76	131	173	559	133	239	747	98
2018-03	physiology	13	186		349	560	323	2891	903	645	946	29	598	966	496	2118	1600	2028	345	1322	548	3808	25	76	131	186	559	133	239	747	98
2018-03	plant biology	32	591		349	560	323	2891	903	645	946	29	598	966	496	2118	1600	2028	345	1322	548	3808	25	76	131	186	591	133	239	747	98
2018-03	scientific communication and education	6	139		349	560	323	2891	903	645	946	29	598	966	496	2118	1600	2028	345	1322	548	3808	25	76	131	186	591	139	239	747	98
2018-03	synthetic biology	17	256		349	560	323	2891	903	645	946	29	598	966	496	2118	1600	2028	345	1322	548	3808	25	76	131	186	591	139	256	747	98
2018-03	systems biology	50	797		349	560	323	2891	903	645	946	29	598	966	496	2118	1600	2028	345	1322	548	3808	25	76	131	186	591	139	256	797	98
2018-03	zoology	6	104		349	560	323	2891	903	645	946	29	598	966	496	2118	1600	2028	345	1322	548	3808	25	76	131	186	591	139	256	797	104
2018-04	animal behavior and cognition	15	364		364	560	323	2891	903	645	946	29	598	966	496	2118	1600	2028	345	1322	548	3808	25	76	131	186	591	139	256	797	104
2018-04	biochemistry	53	613		364	613	323	2891	903	645	946	29	598	966	496	2118	1600	2028	345	1322	548	3808	25	76	131	186	591	139	256	797	104
2018-04	bioengineering	21	344		364	613	344	2891	903	645	946	29	598	966	496	2118	1600	2028	345	1322	548	3808	25	76	131	186	591	139	256	797	104
2018-04	bioinformatics	157	3048		364	613	344	3048	903	645	946	29	598	966	496	2118	1600	2028	345	1322	548	3808	25	76	131	186	591	139	256	797	104
2018-04	biophysics	88	991		364	613	344	3048	991	645	946	29	598	966	496	2118	1600	2028	345	1322	548	3808	25	76	131	186	591	139	256	797	104
2018-04	cancer biology	48	693		364	613	344	3048	991	693	946	29	598	966	496	2118	1600	2028	345	1322	548	3808	25	76	131	186	591	139	256	797	104
2018-04	cell biology	71	1017		364	613	344	3048	991	693	1017	29	598	966	496	2118	1600	2028	345	1322	548	3808	25	76	131	186	591	139	256	797	104
2018-04	clinical trials	6	35		364	613	344	3048	991	693	1017	35	598	966	496	2118	1600	2028	345	1322	548	3808	25	76	131	186	591	139	256	797	104
2018-04	developmental biology	53	651		364	613	344	3048	991	693	1017	35	651	966	496	2118	1600	2028	345	1322	548	3808	25	76	131	186	591	139	256	797	104
2018-04	ecology	45	1011		364	613	344	3048	991	693	1017	35	651	1011	496	2118	1600	2028	345	1322	548	3808	25	76	131	186	591	139	256	797	104
2018-04	epidemiology	36	532		364	613	344	3048	991	693	1017	35	651	1011	532	2118	1600	2028	345	1322	548	3808	25	76	131	186	591	139	256	797	104
2018-04	evolutionary biology	74	2192		364	613	344	3048	991	693	1017	35	651	1011	532	2192	1600	2028	345	1322	548	3808	25	76	131	186	591	139	256	797	104
2018-04	genetics	79	1679		364	613	344	3048	991	693	1017	35	651	1011	532	2192	1679	2028	345	1322	548	3808	25	76	131	186	591	139	256	797	104
2018-04	genomics	99	2127		364	613	344	3048	991	693	1017	35	651	1011	532	2192	1679	2127	345	1322	548	3808	25	76	131	186	591	139	256	797	104
2018-04	immunology	53	398		364	613	344	3048	991	693	1017	35	651	1011	532	2192	1679	2127	398	1322	548	3808	25	76	131	186	591	139	256	797	104
2018-04	microbiology	162	1484		364	613	344	3048	991	693	1017	35	651	1011	532	2192	1679	2127	398	1484	548	3808	25	76	131	186	591	139	256	797	104
2018-04	molecular biology	44	592		364	613	344	3048	991	693	1017	35	651	1011	532	2192	1679	2127	398	1484	592	3808	25	76	131	186	591	139	256	797	104
2018-04	neuroscience	261	4069		364	613	344	3048	991	693	1017	35	651	1011	532	2192	1679	2127	398	1484	592	4069	25	76	131	186	591	139	256	797	104
2018-04	paleontology	1	26		364	613	344	3048	991	693	1017	35	651	1011	532	2192	1679	2127	398	1484	592	4069	26	76	131	186	591	139	256	797	104
2018-04	pathology	9	85		364	613	344	3048	991	693	1017	35	651	1011	532	2192	1679	2127	398	1484	592	4069	26	85	131	186	591	139	256	797	104
2018-04	pharmacology and toxicology	10	141		364	613	344	3048	991	693	1017	35	651	1011	532	2192	1679	2127	398	1484	592	4069	26	85	141	186	591	139	256	797	104
2018-04	physiology	7	193		364	613	344	3048	991	693	1017	35	651	1011	532	2192	1679	2127	398	1484	592	4069	26	85	141	193	591	139	256	797	104
2018-04	plant biology	32	623		364	613	344	3048	991	693	1017	35	651	1011	532	2192	1679	2127	398	1484	592	4069	26	85	141	193	623	139	256	797	104
2018-04	scientific communication and education	7	146		364	613	344	3048	991	693	1017	35	651	1011	532	2192	1679	2127	398	1484	592	4069	26	85	141	193	623	146	256	797	104
2018-04	synthetic biology	14	270		364	613	344	3048	991	693	1017	35	651	1011	532	2192	1679	2127	398	1484	592	4069	26	85	141	193	623	146	270	797	104
2018-04	systems biology	43	840		364	613	344	3048	991	693	1017	35	651	1011	532	2192	1679	2127	398	1484	592	4069	26	85	141	193	623	146	270	840	104
2018-04	zoology	7	111		364	613	344	3048	991	693	1017	35	651	1011	532	2192	1679	2127	398	1484	592	4069	26	85	141	193	623	146	270	840	111
2018-05	animal behavior and cognition	31	395		395	613	344	3048	991	693	1017	35	651	1011	532	2192	1679	2127	398	1484	592	4069	26	85	141	193	623	146	270	840	111
2018-05	biochemistry	59	672		395	672	344	3048	991	693	1017	35	651	1011	532	2192	1679	2127	398	1484	592	4069	26	85	141	193	623	146	270	840	111
2018-05	bioengineering	42	386		395	672	386	3048	991	693	1017	35	651	1011	532	2192	1679	2127	398	1484	592	4069	26	85	141	193	623	146	270	840	111
2018-05	bioinformatics	178	3226		395	672	386	3226	991	693	1017	35	651	1011	532	2192	1679	2127	398	1484	592	4069	26	85	141	193	623	146	270	840	111
2018-05	biophysics	82	1073		395	672	386	3226	1073	693	1017	35	651	1011	532	2192	1679	2127	398	1484	592	4069	26	85	141	193	623	146	270	840	111
2018-05	cancer biology	68	761		395	672	386	3226	1073	761	1017	35	651	1011	532	2192	1679	2127	398	1484	592	4069	26	85	141	193	623	146	270	840	111
2018-05	cell biology	93	1110		395	672	386	3226	1073	761	1110	35	651	1011	532	2192	1679	2127	398	1484	592	4069	26	85	141	193	623	146	270	840	111
2018-05	clinical trials	6	41		395	672	386	3226	1073	761	1110	41	651	1011	532	2192	1679	2127	398	1484	592	4069	26	85	141	193	623	146	270	840	111
2018-05	developmental biology	66	717		395	672	386	3226	1073	761	1110	41	717	1011	532	2192	1679	2127	398	1484	592	4069	26	85	141	193	623	146	270	840	111
2018-05	ecology	86	1097		395	672	386	3226	1073	761	1110	41	717	1097	532	2192	1679	2127	398	1484	592	4069	26	85	141	193	623	146	270	840	111
2018-05	epidemiology	50	582		395	672	386	3226	1073	761	1110	41	717	1097	582	2192	1679	2127	398	1484	592	4069	26	85	141	193	623	146	270	840	111
2018-05	evolutionary biology	100	2292		395	672	386	3226	1073	761	1110	41	717	1097	582	2292	1679	2127	398	1484	592	4069	26	85	141	193	623	146	270	840	111
2018-05	genetics	86	1765		395	672	386	3226	1073	761	1110	41	717	1097	582	2292	1765	2127	398	1484	592	4069	26	85	141	193	623	146	270	840	111
2018-05	genomics	103	2230		395	672	386	3226	1073	761	1110	41	717	1097	582	2292	1765	2230	398	1484	592	4069	26	85	141	193	623	146	270	840	111
2018-05	immunology	61	459		395	672	386	3226	1073	761	1110	41	717	1097	582	2292	1765	2230	459	1484	592	4069	26	85	141	193	623	146	270	840	111
2018-05	microbiology	259	1743		395	672	386	3226	1073	761	1110	41	717	1097	582	2292	1765	2230	459	1743	592	4069	26	85	141	193	623	146	270	840	111
2018-05	molecular biology	70	662		395	672	386	3226	1073	761	1110	41	717	1097	582	2292	1765	2230	459	1743	662	4069	26	85	141	193	623	146	270	840	111
2018-05	neuroscience	303	4372		395	672	386	3226	1073	761	1110	41	717	1097	582	2292	1765	2230	459	1743	662	4372	26	85	141	193	623	146	270	840	111
2018-05	paleontology	4	30		395	672	386	3226	1073	761	1110	41	717	1097	582	2292	1765	2230	459	1743	662	4372	30	85	141	193	623	146	270	840	111
2018-05	pathology	6	91		395	672	386	3226	1073	761	1110	41	717	1097	582	2292	1765	2230	459	1743	662	4372	30	91	141	193	623	146	270	840	111
2018-05	pharmacology and toxicology	20	161		395	672	386	3226	1073	761	1110	41	717	1097	582	2292	1765	2230	459	1743	662	4372	30	91	161	193	623	146	270	840	111
2018-05	physiology	27	220		395	672	386	3226	1073	761	1110	41	717	1097	582	2292	1765	2230	459	1743	662	4372	30	91	161	220	623	146	270	840	111
2018-05	plant biology	43	666		395	672	386	3226	1073	761	1110	41	717	1097	582	2292	1765	2230	459	1743	662	4372	30	91	161	220	666	146	270	840	111
2018-05	scientific communication and education	7	153		395	672	386	3226	1073	761	1110	41	717	1097	582	2292	1765	2230	459	1743	662	4372	30	91	161	220	666	153	270	840	111
2018-05	synthetic biology	17	287		395	672	386	3226	1073	761	1110	41	717	1097	582	2292	1765	2230	459	1743	662	4372	30	91	161	220	666	153	287	840	111
2018-05	systems biology	59	899		395	672	386	3226	1073	761	1110	41	717	1097	582	2292	1765	2230	459	1743	662	4372	30	91	161	220	666	153	287	899	111
2018-05	zoology	6	117		395	672	386	3226	1073	761	1110	41	717	1097	582	2292	1765	2230	459	1743	662	4372	30	91	161	220	666	153	287	899	117
2018-06	animal behavior and cognition	46	441		441	672	386	3226	1073	761	1110	41	717	1097	582	2292	1765	2230	459	1743	662	4372	30	91	161	220	666	153	287	899	117
2018-06	biochemistry	50	722		441	722	386	3226	1073	761	1110	41	717	1097	582	2292	1765	2230	459	1743	662	4372	30	91	161	220	666	153	287	899	117
2018-06	bioengineering	26	412		441	722	412	3226	1073	761	1110	41	717	1097	582	2292	1765	2230	459	1743	662	4372	30	91	161	220	666	153	287	899	117
2018-06	bioinformatics	169	3395		441	722	412	3395	1073	761	1110	41	717	1097	582	2292	1765	2230	459	1743	662	4372	30	91	161	220	666	153	287	899	117
2018-06	biophysics	72	1145		441	722	412	3395	1145	761	1110	41	717	1097	582	2292	1765	2230	459	1743	662	4372	30	91	161	220	666	153	287	899	117
2018-06	cancer biology	71	832		441	722	412	3395	1145	832	1110	41	717	1097	582	2292	1765	2230	459	1743	662	4372	30	91	161	220	666	153	287	899	117
2018-06	cell biology	85	1195		441	722	412	3395	1145	832	1195	41	717	1097	582	2292	1765	2230	459	1743	662	4372	30	91	161	220	666	153	287	899	117
2018-06	clinical trials	3	44		441	722	412	3395	1145	832	1195	44	717	1097	582	2292	1765	2230	459	1743	662	4372	30	91	161	220	666	153	287	899	117
2018-06	developmental biology	63	780		441	722	412	3395	1145	832	1195	44	780	1097	582	2292	1765	2230	459	1743	662	4372	30	91	161	220	666	153	287	899	117
2018-06	ecology	84	1181		441	722	412	3395	1145	832	1195	44	780	1181	582	2292	1765	2230	459	1743	662	4372	30	91	161	220	666	153	287	899	117
2018-06	epidemiology	55	637		441	722	412	3395	1145	832	1195	44	780	1181	637	2292	1765	2230	459	1743	662	4372	30	91	161	220	666	153	287	899	117
2018-06	evolutionary biology	104	2396		441	722	412	3395	1145	832	1195	44	780	1181	637	2396	1765	2230	459	1743	662	4372	30	91	161	220	666	153	287	899	117
2018-06	genetics	81	1846		441	722	412	3395	1145	832	1195	44	780	1181	637	2396	1846	2230	459	1743	662	4372	30	91	161	220	666	153	287	899	117
2018-06	genomics	113	2343		441	722	412	3395	1145	832	1195	44	780	1181	637	2396	1846	2343	459	1743	662	4372	30	91	161	220	666	153	287	899	117
2018-06	immunology	54	513		441	722	412	3395	1145	832	1195	44	780	1181	637	2396	1846	2343	513	1743	662	4372	30	91	161	220	666	153	287	899	117
2018-06	microbiology	210	1953		441	722	412	3395	1145	832	1195	44	780	1181	637	2396	1846	2343	513	1953	662	4372	30	91	161	220	666	153	287	899	117
2018-06	molecular biology	62	724		441	722	412	3395	1145	832	1195	44	780	1181	637	2396	1846	2343	513	1953	724	4372	30	91	161	220	666	153	287	899	117
2018-06	neuroscience	326	4698		441	722	412	3395	1145	832	1195	44	780	1181	637	2396	1846	2343	513	1953	724	4698	30	91	161	220	666	153	287	899	117
2018-06	paleontology	4	34		441	722	412	3395	1145	832	1195	44	780	1181	637	2396	1846	2343	513	1953	724	4698	34	91	161	220	666	153	287	899	117
2018-06	pathology	14	105		441	722	412	3395	1145	832	1195	44	780	1181	637	2396	1846	2343	513	1953	724	4698	34	105	161	220	666	153	287	899	117
2018-06	pharmacology and toxicology	15	176		441	722	412	3395	1145	832	1195	44	780	1181	637	2396	1846	2343	513	1953	724	4698	34	105	176	220	666	153	287	899	117
2018-06	physiology	18	238		441	722	412	3395	1145	832	1195	44	780	1181	637	2396	1846	2343	513	1953	724	4698	34	105	176	238	666	153	287	899	117
2018-06	plant biology	40	706		441	722	412	3395	1145	832	1195	44	780	1181	637	2396	1846	2343	513	1953	724	4698	34	105	176	238	706	153	287	899	117
2018-06	scientific communication and education	17	170		441	722	412	3395	1145	832	1195	44	780	1181	637	2396	1846	2343	513	1953	724	4698	34	105	176	238	706	170	287	899	117
2018-06	synthetic biology	23	310		441	722	412	3395	1145	832	1195	44	780	1181	637	2396	1846	2343	513	1953	724	4698	34	105	176	238	706	170	310	899	117
2018-06	systems biology	54	953		441	722	412	3395	1145	832	1195	44	780	1181	637	2396	1846	2343	513	1953	724	4698	34	105	176	238	706	170	310	953	117
2018-06	zoology	8	125		441	722	412	3395	1145	832	1195	44	780	1181	637	2396	1846	2343	513	1953	724	4698	34	105	176	238	706	170	310	953	125
2018-07	animal behavior and cognition	32	473		473	722	412	3395	1145	832	1195	44	780	1181	637	2396	1846	2343	513	1953	724	4698	34	105	176	238	706	170	310	953	125
2018-07	biochemistry	43	765		473	765	412	3395	1145	832	1195	44	780	1181	637	2396	1846	2343	513	1953	724	4698	34	105	176	238	706	170	310	953	125
2018-07	bioengineering	42	454		473	765	454	3395	1145	832	1195	44	780	1181	637	2396	1846	2343	513	1953	724	4698	34	105	176	238	706	170	310	953	125
2018-07	bioinformatics	152	3547		473	765	454	3547	1145	832	1195	44	780	1181	637	2396	1846	2343	513	1953	724	4698	34	105	176	238	706	170	310	953	125
2018-07	biophysics	90	1235		473	765	454	3547	1235	832	1195	44	780	1181	637	2396	1846	2343	513	1953	724	4698	34	105	176	238	706	170	310	953	125
2018-07	cancer biology	67	899		473	765	454	3547	1235	899	1195	44	780	1181	637	2396	1846	2343	513	1953	724	4698	34	105	176	238	706	170	310	953	125
2018-07	cell biology	90	1285		473	765	454	3547	1235	899	1285	44	780	1181	637	2396	1846	2343	513	1953	724	4698	34	105	176	238	706	170	310	953	125
2018-07	clinical trials	2	46		473	765	454	3547	1235	899	1285	46	780	1181	637	2396	1846	2343	513	1953	724	4698	34	105	176	238	706	170	310	953	125
2018-07	developmental biology	61	841		473	765	454	3547	1235	899	1285	46	841	1181	637	2396	1846	2343	513	1953	724	4698	34	105	176	238	706	170	310	953	125
2018-07	ecology	72	1253		473	765	454	3547	1235	899	1285	46	841	1253	637	2396	1846	2343	513	1953	724	4698	34	105	176	238	706	170	310	953	125
2018-07	epidemiology	43	680		473	765	454	3547	1235	899	1285	46	841	1253	680	2396	1846	2343	513	1953	724	4698	34	105	176	238	706	170	310	953	125
2018-07	evolutionary biology	97	2493		473	765	454	3547	1235	899	1285	46	841	1253	680	2493	1846	2343	513	1953	724	4698	34	105	176	238	706	170	310	953	125
2018-07	genetics	107	1953		473	765	454	3547	1235	899	1285	46	841	1253	680	2493	1953	2343	513	1953	724	4698	34	105	176	238	706	170	310	953	125
2018-07	genomics	115	2458		473	765	454	3547	1235	899	1285	46	841	1253	680	2493	1953	2458	513	1953	724	4698	34	105	176	238	706	170	310	953	125
2018-07	immunology	40	553		473	765	454	3547	1235	899	1285	46	841	1253	680	2493	1953	2458	553	1953	724	4698	34	105	176	238	706	170	310	953	125
2018-07	microbiology	141	2094		473	765	454	3547	1235	899	1285	46	841	1253	680	2493	1953	2458	553	2094	724	4698	34	105	176	238	706	170	310	953	125
2018-07	molecular biology	55	779		473	765	454	3547	1235	899	1285	46	841	1253	680	2493	1953	2458	553	2094	779	4698	34	105	176	238	706	170	310	953	125
2018-07	neuroscience	292	4990		473	765	454	3547	1235	899	1285	46	841	1253	680	2493	1953	2458	553	2094	779	4990	34	105	176	238	706	170	310	953	125
2018-07	paleontology	1	35		473	765	454	3547	1235	899	1285	46	841	1253	680	2493	1953	2458	553	2094	779	4990	35	105	176	238	706	170	310	953	125
2018-07	pathology	6	111		473	765	454	3547	1235	899	1285	46	841	1253	680	2493	1953	2458	553	2094	779	4990	35	111	176	238	706	170	310	953	125
2018-07	pharmacology and toxicology	14	190		473	765	454	3547	1235	899	1285	46	841	1253	680	2493	1953	2458	553	2094	779	4990	35	111	190	238	706	170	310	953	125
2018-07	physiology	21	259		473	765	454	3547	1235	899	1285	46	841	1253	680	2493	1953	2458	553	2094	779	4990	35	111	190	259	706	170	310	953	125
2018-07	plant biology	63	769		473	765	454	3547	1235	899	1285	46	841	1253	680	2493	1953	2458	553	2094	779	4990	35	111	190	259	769	170	310	953	125
2018-07	scientific communication and education	16	186		473	765	454	3547	1235	899	1285	46	841	1253	680	2493	1953	2458	553	2094	779	4990	35	111	190	259	769	186	310	953	125
2018-07	synthetic biology	16	326		473	765	454	3547	1235	899	1285	46	841	1253	680	2493	1953	2458	553	2094	779	4990	35	111	190	259	769	186	326	953	125
2018-07	systems biology	42	995		473	765	454	3547	1235	899	1285	46	841	1253	680	2493	1953	2458	553	2094	779	4990	35	111	190	259	769	186	326	995	125
2018-07	zoology	7	132		473	765	454	3547	1235	899	1285	46	841	1253	680	2493	1953	2458	553	2094	779	4990	35	111	190	259	769	186	326	995	132
2018-08	animal behavior and cognition	34	507		507	765	454	3547	1235	899	1285	46	841	1253	680	2493	1953	2458	553	2094	779	4990	35	111	190	259	769	186	326	995	132
2018-08	biochemistry	54	819		507	819	454	3547	1235	899	1285	46	841	1253	680	2493	1953	2458	553	2094	779	4990	35	111	190	259	769	186	326	995	132
2018-08	bioengineering	44	498		507	819	498	3547	1235	899	1285	46	841	1253	680	2493	1953	2458	553	2094	779	4990	35	111	190	259	769	186	326	995	132
2018-08	bioinformatics	168	3715		507	819	498	3715	1235	899	1285	46	841	1253	680	2493	1953	2458	553	2094	779	4990	35	111	190	259	769	186	326	995	132
2018-08	biophysics	78	1313		507	819	498	3715	1313	899	1285	46	841	1253	680	2493	1953	2458	553	2094	779	4990	35	111	190	259	769	186	326	995	132
2018-08	cancer biology	60	959		507	819	498	3715	1313	959	1285	46	841	1253	680	2493	1953	2458	553	2094	779	4990	35	111	190	259	769	186	326	995	132
2018-08	cell biology	107	1392		507	819	498	3715	1313	959	1392	46	841	1253	680	2493	1953	2458	553	2094	779	4990	35	111	190	259	769	186	326	995	132
2018-08	clinical trials	2	48		507	819	498	3715	1313	959	1392	48	841	1253	680	2493	1953	2458	553	2094	779	4990	35	111	190	259	769	186	326	995	132
2018-08	developmental biology	63	904		507	819	498	3715	1313	959	1392	48	904	1253	680	2493	1953	2458	553	2094	779	4990	35	111	190	259	769	186	326	995	132
2018-08	ecology	59	1312		507	819	498	3715	1313	959	1392	48	904	1312	680	2493	1953	2458	553	2094	779	4990	35	111	190	259	769	186	326	995	132
2018-08	epidemiology	66	746		507	819	498	3715	1313	959	1392	48	904	1312	746	2493	1953	2458	553	2094	779	4990	35	111	190	259	769	186	326	995	132
2018-08	evolutionary biology	106	2599		507	819	498	3715	1313	959	1392	48	904	1312	746	2599	1953	2458	553	2094	779	4990	35	111	190	259	769	186	326	995	132
2018-08	genetics	94	2047		507	819	498	3715	1313	959	1392	48	904	1312	746	2599	2047	2458	553	2094	779	4990	35	111	190	259	769	186	326	995	132
2018-08	genomics	122	2580		507	819	498	3715	1313	959	1392	48	904	1312	746	2599	2047	2580	553	2094	779	4990	35	111	190	259	769	186	326	995	132
2018-08	immunology	47	600		507	819	498	3715	1313	959	1392	48	904	1312	746	2599	2047	2580	600	2094	779	4990	35	111	190	259	769	186	326	995	132
2018-08	microbiology	175	2269		507	819	498	3715	1313	959	1392	48	904	1312	746	2599	2047	2580	600	2269	779	4990	35	111	190	259	769	186	326	995	132
2018-08	molecular biology	71	850		507	819	498	3715	1313	959	1392	48	904	1312	746	2599	2047	2580	600	2269	850	4990	35	111	190	259	769	186	326	995	132
2018-08	neuroscience	315	5305		507	819	498	3715	1313	959	1392	48	904	1312	746	2599	2047	2580	600	2269	850	5305	35	111	190	259	769	186	326	995	132
2018-08	paleontology	4	39		507	819	498	3715	1313	959	1392	48	904	1312	746	2599	2047	2580	600	2269	850	5305	39	111	190	259	769	186	326	995	132
2018-08	pathology	11	122		507	819	498	3715	1313	959	1392	48	904	1312	746	2599	2047	2580	600	2269	850	5305	39	122	190	259	769	186	326	995	132
2018-08	pharmacology and toxicology	14	204		507	819	498	3715	1313	959	1392	48	904	1312	746	2599	2047	2580	600	2269	850	5305	39	122	204	259	769	186	326	995	132
2018-08	physiology	30	289		507	819	498	3715	1313	959	1392	48	904	1312	746	2599	2047	2580	600	2269	850	5305	39	122	204	289	769	186	326	995	132
2018-08	plant biology	43	812		507	819	498	3715	1313	959	1392	48	904	1312	746	2599	2047	2580	600	2269	850	5305	39	122	204	289	812	186	326	995	132
2018-08	scientific communication and education	12	198		507	819	498	3715	1313	959	1392	48	904	1312	746	2599	2047	2580	600	2269	850	5305	39	122	204	289	812	198	326	995	132
2018-08	synthetic biology	16	342		507	819	498	3715	1313	959	1392	48	904	1312	746	2599	2047	2580	600	2269	850	5305	39	122	204	289	812	198	342	995	132
2018-08	systems biology	53	1048		507	819	498	3715	1313	959	1392	48	904	1312	746	2599	2047	2580	600	2269	850	5305	39	122	204	289	812	198	342	1048	132
2018-08	zoology	14	146		507	819	498	3715	1313	959	1392	48	904	1312	746	2599	2047	2580	600	2269	850	5305	39	122	204	289	812	198	342	1048	146
2018-09	animal behavior and cognition	31	538		538	819	498	3715	1313	959	1392	48	904	1312	746	2599	2047	2580	600	2269	850	5305	39	122	204	289	812	198	342	1048	146
2018-09	biochemistry	57	876		538	876	498	3715	1313	959	1392	48	904	1312	746	2599	2047	2580	600	2269	850	5305	39	122	204	289	812	198	342	1048	146
2018-09	bioengineering	45	543		538	876	543	3715	1313	959	1392	48	904	1312	746	2599	2047	2580	600	2269	850	5305	39	122	204	289	812	198	342	1048	146
2018-09	bioinformatics	170	3885		538	876	543	3885	1313	959	1392	48	904	1312	746	2599	2047	2580	600	2269	850	5305	39	122	204	289	812	198	342	1048	146
2018-09	biophysics	82	1395		538	876	543	3885	1395	959	1392	48	904	1312	746	2599	2047	2580	600	2269	850	5305	39	122	204	289	812	198	342	1048	146
2018-09	cancer biology	64	1023		538	876	543	3885	1395	1023	1392	48	904	1312	746	2599	2047	2580	600	2269	850	5305	39	122	204	289	812	198	342	1048	146
2018-09	cell biology	104	1496		538	876	543	3885	1395	1023	1496	48	904	1312	746	2599	2047	2580	600	2269	850	5305	39	122	204	289	812	198	342	1048	146
2018-09	clinical trials	4	52		538	876	543	3885	1395	1023	1496	52	904	1312	746	2599	2047	2580	600	2269	850	5305	39	122	204	289	812	198	342	1048	146
2018-09	developmental biology	82	986		538	876	543	3885	1395	1023	1496	52	986	1312	746	2599	2047	2580	600	2269	850	5305	39	122	204	289	812	198	342	1048	146
2018-09	ecology	86	1398		538	876	543	3885	1395	1023	1496	52	986	1398	746	2599	2047	2580	600	2269	850	5305	39	122	204	289	812	198	342	1048	146
2018-09	epidemiology	60	806		538	876	543	3885	1395	1023	1496	52	986	1398	806	2599	2047	2580	600	2269	850	5305	39	122	204	289	812	198	342	1048	146
2018-09	evolutionary biology	124	2723		538	876	543	3885	1395	1023	1496	52	986	1398	806	2723	2047	2580	600	2269	850	5305	39	122	204	289	812	198	342	1048	146
2018-09	genetics	93	2140		538	876	543	3885	1395	1023	1496	52	986	1398	806	2723	2140	2580	600	2269	850	5305	39	122	204	289	812	198	342	1048	146
2018-09	genomics	113	2693		538	876	543	3885	1395	1023	1496	52	986	1398	806	2723	2140	2693	600	2269	850	5305	39	122	204	289	812	198	342	1048	146
2018-09	immunology	41	641		538	876	543	3885	1395	1023	1496	52	986	1398	806	2723	2140	2693	641	2269	850	5305	39	122	204	289	812	198	342	1048	146
2018-09	microbiology	160	2429		538	876	543	3885	1395	1023	1496	52	986	1398	806	2723	2140	2693	641	2429	850	5305	39	122	204	289	812	198	342	1048	146
2018-09	molecular biology	71	921		538	876	543	3885	1395	1023	1496	52	986	1398	806	2723	2140	2693	641	2429	921	5305	39	122	204	289	812	198	342	1048	146
2018-09	neuroscience	362	5667		538	876	543	3885	1395	1023	1496	52	986	1398	806	2723	2140	2693	641	2429	921	5667	39	122	204	289	812	198	342	1048	146
2018-09	paleontology	7	46		538	876	543	3885	1395	1023	1496	52	986	1398	806	2723	2140	2693	641	2429	921	5667	46	122	204	289	812	198	342	1048	146
2018-09	pathology	7	129		538	876	543	3885	1395	1023	1496	52	986	1398	806	2723	2140	2693	641	2429	921	5667	46	129	204	289	812	198	342	1048	146
2018-09	pharmacology and toxicology	15	219		538	876	543	3885	1395	1023	1496	52	986	1398	806	2723	2140	2693	641	2429	921	5667	46	129	219	289	812	198	342	1048	146
2018-09	physiology	14	303		538	876	543	3885	1395	1023	1496	52	986	1398	806	2723	2140	2693	641	2429	921	5667	46	129	219	303	812	198	342	1048	146
2018-09	plant biology	39	851		538	876	543	3885	1395	1023	1496	52	986	1398	806	2723	2140	2693	641	2429	921	5667	46	129	219	303	851	198	342	1048	146
2018-09	scientific communication and education	11	209		538	876	543	3885	1395	1023	1496	52	986	1398	806	2723	2140	2693	641	2429	921	5667	46	129	219	303	851	209	342	1048	146
2018-09	synthetic biology	16	358		538	876	543	3885	1395	1023	1496	52	986	1398	806	2723	2140	2693	641	2429	921	5667	46	129	219	303	851	209	358	1048	146
2018-09	systems biology	44	1092		538	876	543	3885	1395	1023	1496	52	986	1398	806	2723	2140	2693	641	2429	921	5667	46	129	219	303	851	209	358	1092	146
2018-09	zoology	13	159		538	876	543	3885	1395	1023	1496	52	986	1398	806	2723	2140	2693	641	2429	921	5667	46	129	219	303	851	209	358	1092	159
2018-10	animal behavior and cognition	46	584		584	876	543	3885	1395	1023	1496	52	986	1398	806	2723	2140	2693	641	2429	921	5667	46	129	219	303	851	209	358	1092	159
2018-10	biochemistry	70	946		584	946	543	3885	1395	1023	1496	52	986	1398	806	2723	2140	2693	641	2429	921	5667	46	129	219	303	851	209	358	1092	159
2018-10	bioengineering	37	580		584	946	580	3885	1395	1023	1496	52	986	1398	806	2723	2140	2693	641	2429	921	5667	46	129	219	303	851	209	358	1092	159
2018-10	bioinformatics	180	4065		584	946	580	4065	1395	1023	1496	52	986	1398	806	2723	2140	2693	641	2429	921	5667	46	129	219	303	851	209	358	1092	159
2018-10	biophysics	96	1491		584	946	580	4065	1491	1023	1496	52	986	1398	806	2723	2140	2693	641	2429	921	5667	46	129	219	303	851	209	358	1092	159
2018-10	cancer biology	75	1098		584	946	580	4065	1491	1098	1496	52	986	1398	806	2723	2140	2693	641	2429	921	5667	46	129	219	303	851	209	358	1092	159
2018-10	cell biology	109	1605		584	946	580	4065	1491	1098	1605	52	986	1398	806	2723	2140	2693	641	2429	921	5667	46	129	219	303	851	209	358	1092	159
2018-10	clinical trials	4	56		584	946	580	4065	1491	1098	1605	56	986	1398	806	2723	2140	2693	641	2429	921	5667	46	129	219	303	851	209	358	1092	159
2018-10	developmental biology	68	1054		584	946	580	4065	1491	1098	1605	56	1054	1398	806	2723	2140	2693	641	2429	921	5667	46	129	219	303	851	209	358	1092	159
2018-10	ecology	98	1496		584	946	580	4065	1491	1098	1605	56	1054	1496	806	2723	2140	2693	641	2429	921	5667	46	129	219	303	851	209	358	1092	159
2018-10	epidemiology	62	868		584	946	580	4065	1491	1098	1605	56	1054	1496	868	2723	2140	2693	641	2429	921	5667	46	129	219	303	851	209	358	1092	159
2018-10	evolutionary biology	111	2834		584	946	580	4065	1491	1098	1605	56	1054	1496	868	2834	2140	2693	641	2429	921	5667	46	129	219	303	851	209	358	1092	159
2018-10	genetics	106	2246		584	946	580	4065	1491	1098	1605	56	1054	1496	868	2834	2246	2693	641	2429	921	5667	46	129	219	303	851	209	358	1092	159
2018-10	genomics	126	2819		584	946	580	4065	1491	1098	1605	56	1054	1496	868	2834	2246	2819	641	2429	921	5667	46	129	219	303	851	209	358	1092	159
2018-10	immunology	52	693		584	946	580	4065	1491	1098	1605	56	1054	1496	868	2834	2246	2819	693	2429	921	5667	46	129	219	303	851	209	358	1092	159
2018-10	microbiology	192	2621		584	946	580	4065	1491	1098	1605	56	1054	1496	868	2834	2246	2819	693	2621	921	5667	46	129	219	303	851	209	358	1092	159
2018-10	molecular biology	73	994		584	946	580	4065	1491	1098	1605	56	1054	1496	868	2834	2246	2819	693	2621	994	5667	46	129	219	303	851	209	358	1092	159
2018-10	neuroscience	419	6086		584	946	580	4065	1491	1098	1605	56	1054	1496	868	2834	2246	2819	693	2621	994	6086	46	129	219	303	851	209	358	1092	159
2018-10	paleontology	2	48		584	946	580	4065	1491	1098	1605	56	1054	1496	868	2834	2246	2819	693	2621	994	6086	48	129	219	303	851	209	358	1092	159
2018-10	pathology	8	137		584	946	580	4065	1491	1098	1605	56	1054	1496	868	2834	2246	2819	693	2621	994	6086	48	137	219	303	851	209	358	1092	159
2018-10	pharmacology and toxicology	27	246		584	946	580	4065	1491	1098	1605	56	1054	1496	868	2834	2246	2819	693	2621	994	6086	48	137	246	303	851	209	358	1092	159
2018-10	physiology	25	328		584	946	580	4065	1491	1098	1605	56	1054	1496	868	2834	2246	2819	693	2621	994	6086	48	137	246	328	851	209	358	1092	159
2018-10	plant biology	49	900		584	946	580	4065	1491	1098	1605	56	1054	1496	868	2834	2246	2819	693	2621	994	6086	48	137	246	328	900	209	358	1092	159
2018-10	scientific communication and education	11	220		584	946	580	4065	1491	1098	1605	56	1054	1496	868	2834	2246	2819	693	2621	994	6086	48	137	246	328	900	220	358	1092	159
2018-10	synthetic biology	16	374		584	946	580	4065	1491	1098	1605	56	1054	1496	868	2834	2246	2819	693	2621	994	6086	48	137	246	328	900	220	374	1092	159
2018-10	systems biology	49	1141		584	946	580	4065	1491	1098	1605	56	1054	1496	868	2834	2246	2819	693	2621	994	6086	48	137	246	328	900	220	374	1141	159
2018-10	zoology	8	167		584	946	580	4065	1491	1098	1605	56	1054	1496	868	2834	2246	2819	693	2621	994	6086	48	137	246	328	900	220	374	1141	167
2018-11	animal behavior and cognition	25	609		609	946	580	4065	1491	1098	1605	56	1054	1496	868	2834	2246	2819	693	2621	994	6086	48	137	246	328	900	220	374	1141	167
2018-11	biochemistry	64	1010		609	1010	580	4065	1491	1098	1605	56	1054	1496	868	2834	2246	2819	693	2621	994	6086	48	137	246	328	900	220	374	1141	167
2018-11	bioengineering	47	627		609	1010	627	4065	1491	1098	1605	56	1054	1496	868	2834	2246	2819	693	2621	994	6086	48	137	246	328	900	220	374	1141	167
2018-11	bioinformatics	184	4249		609	1010	627	4249	1491	1098	1605	56	1054	1496	868	2834	2246	2819	693	2621	994	6086	48	137	246	328	900	220	374	1141	167
2018-11	biophysics	75	1566		609	1010	627	4249	1566	1098	1605	56	1054	1496	868	2834	2246	2819	693	2621	994	6086	48	137	246	328	900	220	374	1141	167
2018-11	cancer biology	64	1162		609	1010	627	4249	1566	1162	1605	56	1054	1496	868	2834	2246	2819	693	2621	994	6086	48	137	246	328	900	220	374	1141	167
2018-11	cell biology	98	1703		609	1010	627	4249	1566	1162	1703	56	1054	1496	868	2834	2246	2819	693	2621	994	6086	48	137	246	328	900	220	374	1141	167
2018-11	clinical trials	8	64		609	1010	627	4249	1566	1162	1703	64	1054	1496	868	2834	2246	2819	693	2621	994	6086	48	137	246	328	900	220	374	1141	167
2018-11	developmental biology	67	1121		609	1010	627	4249	1566	1162	1703	64	1121	1496	868	2834	2246	2819	693	2621	994	6086	48	137	246	328	900	220	374	1141	167
2018-11	ecology	73	1569		609	1010	627	4249	1566	1162	1703	64	1121	1569	868	2834	2246	2819	693	2621	994	6086	48	137	246	328	900	220	374	1141	167
2018-11	epidemiology	81	949		609	1010	627	4249	1566	1162	1703	64	1121	1569	949	2834	2246	2819	693	2621	994	6086	48	137	246	328	900	220	374	1141	167
2018-11	evolutionary biology	100	2934		609	1010	627	4249	1566	1162	1703	64	1121	1569	949	2934	2246	2819	693	2621	994	6086	48	137	246	328	900	220	374	1141	167
2018-11	genetics	92	2338		609	1010	627	4249	1566	1162	1703	64	1121	1569	949	2934	2338	2819	693	2621	994	6086	48	137	246	328	900	220	374	1141	167
2018-11	genomics	124	2943		609	1010	627	4249	1566	1162	1703	64	1121	1569	949	2934	2338	2943	693	2621	994	6086	48	137	246	328	900	220	374	1141	167
2018-11	immunology	60	753		609	1010	627	4249	1566	1162	1703	64	1121	1569	949	2934	2338	2943	753	2621	994	6086	48	137	246	328	900	220	374	1141	167
2018-11	microbiology	148	2769		609	1010	627	4249	1566	1162	1703	64	1121	1569	949	2934	2338	2943	753	2769	994	6086	48	137	246	328	900	220	374	1141	167
2018-11	molecular biology	62	1056		609	1010	627	4249	1566	1162	1703	64	1121	1569	949	2934	2338	2943	753	2769	1056	6086	48	137	246	328	900	220	374	1141	167
2018-11	neuroscience	386	6472		609	1010	627	4249	1566	1162	1703	64	1121	1569	949	2934	2338	2943	753	2769	1056	6472	48	137	246	328	900	220	374	1141	167
2018-11	paleontology	4	52		609	1010	627	4249	1566	1162	1703	64	1121	1569	949	2934	2338	2943	753	2769	1056	6472	52	137	246	328	900	220	374	1141	167
2018-11	pathology	15	152		609	1010	627	4249	1566	1162	1703	64	1121	1569	949	2934	2338	2943	753	2769	1056	6472	52	152	246	328	900	220	374	1141	167
2018-11	pharmacology and toxicology	11	257		609	1010	627	4249	1566	1162	1703	64	1121	1569	949	2934	2338	2943	753	2769	1056	6472	52	152	257	328	900	220	374	1141	167
2018-11	physiology	30	358		609	1010	627	4249	1566	1162	1703	64	1121	1569	949	2934	2338	2943	753	2769	1056	6472	52	152	257	358	900	220	374	1141	167
2018-11	plant biology	57	957		609	1010	627	4249	1566	1162	1703	64	1121	1569	949	2934	2338	2943	753	2769	1056	6472	52	152	257	358	957	220	374	1141	167
2018-11	scientific communication and education	15	235		609	1010	627	4249	1566	1162	1703	64	1121	1569	949	2934	2338	2943	753	2769	1056	6472	52	152	257	358	957	235	374	1141	167
2018-11	synthetic biology	13	387		609	1010	627	4249	1566	1162	1703	64	1121	1569	949	2934	2338	2943	753	2769	1056	6472	52	152	257	358	957	235	387	1141	167
2018-11	systems biology	42	1183		609	1010	627	4249	1566	1162	1703	64	1121	1569	949	2934	2338	2943	753	2769	1056	6472	52	152	257	358	957	235	387	1183	167
2018-11	zoology	6	173		609	1010	627	4249	1566	1162	1703	64	1121	1569	949	2934	2338	2943	753	2769	1056	6472	52	152	257	358	957	235	387	1183	173
