# Supplementary material for: Tracking the popularity and outcomes of all bioRxiv preprints
Source: eLife journal article supplement (doi:10.7554/elife.45133), 2019-04-24
Supplement: supp [file elife-45133-supp-v1.zip › elife_poa_e45133_Figure_1_source_data_3.csv]

month	submissions	cumulative
2013-11	60	60
2013-12	49	109
2014-01	54	163
2014-02	66	229
2014-03	43	272
2014-04	66	338
2014-05	81	419
2014-06	72	491
2014-07	67	558
2014-08	80	638
2014-09	93	731
2014-10	88	819
2014-11	81	900
2014-12	95	995
2015-01	114	1109
2015-02	88	1197
2015-03	120	1317
2015-04	119	1436
2015-05	112	1548
2015-06	128	1676
2015-07	159	1835
2015-08	159	1994
2015-09	162	2156
2015-10	191	2347
2015-11	227	2574
2015-12	194	2768
2016-01	202	2970
2016-02	271	3241
2016-03	366	3607
2016-04	345	3952
2016-05	388	4340
2016-06	400	4740
2016-07	384	5124
2016-08	448	5572
2016-09	436	6008
2016-10	455	6463
2016-11	463	6926
2016-12	557	7483
2017-01	586	8069
2017-02	623	8692
2017-03	812	9504
2017-04	741	10245
2017-05	958	11203
2017-06	1097	12300
2017-07	976	13276
2017-08	988	14264
2017-09	1059	15323
2017-10	1205	16528
2017-11	1196	17724
2017-12	1099	18823
2018-01	1247	20070
2018-02	1228	21298
2018-03	1482	22780
2018-04	1495	24275
2018-05	1932	26207
2018-06	1867	28074
2018-07	1727	29801
2018-08	1862	31663
2018-09	1915	33578
2018-10	2119	35697
2018-11	1951	37648
