# Supplementary material for: Tracking the popularity and outcomes of all bioRxiv preprints
Source: eLife journal article supplement (doi:10.7554/elife.45133), 2019-04-24
Supplement: supp [file elife-45133-supp-v1.zip › elife_poa_e45133_Figure_1_source_data_6.csv]

id	name	papers	emails
203178	George Davey Smith	97	4
216319	Ian J Deary	61	4
203424	Andrew M McIntosh	57	1
202396	Mark J. Daly	47	3
205760	Richard M. Murray	45	2
205770	George M Church	43	4
202672	Benjamin M Neale	39	2
206214	Wei Wang	39	23
251152	Alkes L. Price	36	1
202426	Jian Yang	36	6
200126	Po-Ru Loh	35	2
200288	Caroline Hayward	35	1
200236	Aarno Palotie	34	4
202513	Ole A Andreassen	34	2
203518	Jay Shendure	34	3
221786	Oliver Stegle	33	3
217119	Julio Saez-Rodriguez	32	4
203180	Gibran Hemani	32	3
212478	Veikko Salomaa	32	1
202266	Thierry Mora	31	1
244596	Gerome Breen	30	3
219687	Stephen R. Quake	30	1
210024	Gustavo Deco	30	1
200818	David Reich	30	1
211746	Ying Zhang	30	10
200499	Johannes Krause	30	2
203815	Eleazar Eskin	30	2
200870	Carlos D Bustamante	29	1
250685	Naomi R. Wray	28	2
216945	Aviv Regev	28	1
253753	Bogdan Pasaniuc	28	2
234513	Patrick F Sullivan	28	4
211280	Manolis Kellis	28	2
222361	Gail Davies	28	1
212956	Marc Lipsitch	28	1
250613	Timothy M Frayling	27	1
202428	Peter M. Visscher	27	1
280732	Dave Thirumalai	27	1
200394	Jesse D Bloom	27	2
214310	Danielle S. Bassett	27	1
253743	Alexander Gusev	26	3
217503	Noah Zaitlen	26	2
220147	Kai Wang	26	9
220961	Samuli Ripatti	26	2
202652	Richard Durbin	26	2
202767	Stephan Ripke	26	2
202914	Yoav Gilad	26	1
205969	Casey S. Greene	26	3
212565	Michael Inouye	26	5
203425	David J Porteous	26	1
201925	Yang Liu	26	16
253218	Michael B. Eisen	25	2
204724	Mark Daly	25	2
205994	Herbert Levine	25	1
201663	Claus O Wilke	25	1
212992	Sergey Koren	25	3
203749	Huanming Yang	25	2
204016	Andrew E Jaffe	25	1
249967	Benedict Paten	24	2
201154	Katherine S Pollard	24	2
253253	Benjamin Neale	24	2
202488	Julian Parkhill	24	2
286747	Nicholas G Martin	24	2
220101	Kenneth A Norman	24	2
250612	Andrew R Wood	24	1
221326	Dorret I Boomsma	24	2
211265	Yan Li	24	16
205822	Adam P Arkin	24	2
200820	Jonathan K Pritchard	24	2
206049	Bernhard O Palsson	24	2
206423	Kathryn E Holt	24	1
201690	Jukka Corander	24	2
244585	Ole Mors	23	1
217060	Richard Bonneau	23	3
218836	Yu Zhang	23	11
200201	Marjo-Riitta Jarvelin	23	1
200829	Graham Coop	23	1
228272	Nick Patterson	23	1
228617	Matthew Stephens	23	2
201032	Jacob G Scott	23	3
215077	Chris Sander	23	3
264800	Gad Getz	22	2
200323	Kari Stefansson	22	2
204245	Soumya Raychaudhuri	22	2
200093	Andrew I Su	22	1
202268	Aleksandra M Walczak	22	1
210862	Feng Zhang	22	4
200398	Alexander RA Anderson	22	2
202924	Sophien Kamoun	22	2
202913	Anshul Kundaje	22	2
205771	Yaniv Erlich	22	5
205816	Xin Li	22	11
206144	Gil McVean	22	2
200223	Andres Metspalu	22	3
214720	Li Li	22	15
201057	Matthew W Hahn	22	1
250615	Michael N Weedon	21	1
204207	Sarah A Teichmann	21	2
259194	Mark Gerstein	21	4
210096	Hongkui Zeng	21	1
259519	Paul C. Boutros	21	1
201429	Antonis Rokas	21	1
250819	Xiang Zhou	21	3
200795	Yun S. Song	21	2
251194	Michael Boehnke	21	1
206006	Abhyudai Singh	21	1
277221	Caroline L Relton	21	1
206245	Grant J Jensen	21	1
212996	Adam M Phillippy	21	3
200946	Arne Traulsen	21	2
227707	Benjamin Haibe-Kains	21	4
259365	Pamela Sklar	20	1
204209	Xi Chen	20	9
259416	Sarah E Harris	20	1
219022	Karl Friston	20	2
252765	John D. Chodera	20	2
220100	Uri Hasson	20	2
290195	Thomas Werge	20	1
200744	Jing Li	20	12
249770	Joseph L. DeRisi	20	1
205614	Wei Chen	20	12
248864	Rhiju Das	20	1
223216	Daniel R Weinberger	20	1
267724	Jerome I Rotter	20	1
200816	Marc Robinson-Rechavi	20	1
272059	Jack Bowden	20	1
212474	Markus Perola	20	1
252926	William J. Greenleaf	20	1
212514	Ruedi Aebersold	20	1
203183	Marcus R Munafo	20	1
227918	Roland Eils	20	4
227938	Bo Huang	20	3
203586	Wei Li	20	13
214325	Nikolaus Kriegeskorte	20	4
203750	Jian Wang	20	2
203909	Stephen D Bentley	20	1
216353	Paul M Thompson	20	2
257255	Daniel G. MacArthur	19	2
200603	Chris D Jiggins	19	2
259415	Riccardo E Marioni	19	2
200613	Mark Stoneking	19	2
263812	Markku Laakso	19	2
202333	Alexandros Stamatakis	19	1
247470	Michael C. Schatz	19	4
237605	James Taylor	19	5
288992	Nicholas J. Timpson	19	2
201337	Tanja Stadler	19	2
253103	Erik Ingelsson	19	2
209725	Scott Keeney	19	1
250607	Samuel E Jones	19	1
202550	Andrei Zinovyev	19	1
242876	Toni-Kim Clarke	19	2
205163	Andreas K Engel	19	3
220880	Eleftheria Zeggini	19	3
205706	Daniel H. Chitwood	19	2
200822	Rasmus Nielsen	19	1
212481	Mika Ala-Korpela	19	3
212576	Ruth E Baker	19	2
203330	Chi Zhang	19	9
226211	Jun Liu	19	10
206943	Wei Zhang	19	11
203519	Christine Queitsch	19	2
214123	Yang Li	19	9
229275	Lars T. Westlye	19	1
201881	Eric Schulz	19	3
201930	Alicia Oshlack	19	1
200284	Tonu Esko	19	3
202120	Andrew G. Clark	19	1
247696	Ryan R Wick	18	3
234359	Sadie J. Ryan	18	2
251149	Steven Gazal	18	1
200333	Ivan Baxter	18	2
252495	Lior Pachter	18	2
236145	Ian Deary	18	3
247431	Mark I McCarthy	18	2
218964	Russell Poldrack	18	2
257697	Swapan Mallick	18	2
202514	Anders M Dale	18	2
220962	Bin Zhang	18	6
221073	Leonid Kruglyak	18	1
221879	Jie Zheng	18	7
200150	Eric Boerwinkle	18	1
202809	Florian Markowetz	18	2
211214	Yu Liu	18	9
223627	Lars Juhl Jensen	18	2
212376	Alexander G Fletcher	18	2
224992	Philip L. De Jager	18	2
203179	Neil M Davies	18	1
206795	Paul Flicek	18	1
214554	Xin Wang	18	11
200119	Archie Campbell	18	1
207548	Youhe Gao	18	1
207566	Mark Blaxter	18	1
207955	Juri Rappsilber	18	2
216096	Matteo Carandini	18	2
208237	Hui Zhang	18	12
257238	Job Dekker	17	1
216654	Peng Zhang	17	8
250203	Daniele Ramazzotti	17	2
200593	Richard Neher	17	2
251168	Hanieh Yaghootkar	17	1
218447	Olivier Elemento	17	1
255605	Rafael A. Irizarry	17	3
218625	Detlef Weigel	17	4
250163	Davide Marenduzzo	17	4
201407	Trevor Bedford	17	2
253273	Mark D Robinson	17	1
202669	Christopher R Gignoux	17	2
253137	Jillian F Banfield	17	1
205384	Sten Linnarsson	17	1
249613	Lachlan J. M. Coin	17	1
211257	John Hardy	17	1
211536	Simon Hanslmayr	17	1
202899	Matthew D MacManes	17	2
200798	John Novembre	17	1
206162	Jeffrey D. Jensen	17	2
206267	Jeffrey Ross-Ibarra	17	2
201798	Darrell O. Ricke	17	1
207234	Li Wang	17	12
229154	Roger Pique-Regi	17	2
200182	Lude Franke	17	2
207577	Edward S Buckler	17	1
200297	Alkes Price	17	1
257178	John Danesh	16	1
204381	Philip K Maini	16	2
261439	Hakon Hakonarson	16	2
217539	Wolfgang Huber	16	2
251145	Goncalo Abecasis	16	1
217702	Ariel Rokem	16	2
253330	Rob Patro	16	2
235840	Wei Zhao	16	7
246812	Qian Zhang	16	10
217869	Marcella Rietschel	16	1
263690	Wolf Reik	16	2
236495	Vijay S Pande	16	1
288224	Preben Bo Mortensen	16	1
209252	Dries Bonte	16	1
256594	Major Depressive Disorder Working Group of the Psychiatric Genomics Consortium	16	0
202424	Grant W. Montgomery	16	2
251753	Bing Ren	16	1
238560	Matthew Simpson	16	2
250611	Jessica Tyrrell	16	2
239722	Michael C O'Donovan	16	1
257321	Inigo Martincorena	16	2
239723	Michael J Owen	16	1
259122	Nir Yosef	16	1
200200	Hae Kyung Im	16	1
254390	Sarah E Medland	16	3
202589	Xavier Didelot	16	2
249710	Matthias Schlesner	16	2
202817	Robert J Schmitz	16	1
277999	Albert Hofman	16	2
222360	Saskia P Hagenaars	16	3
269829	Cathryn M Lewis	16	1
211359	Yong Zhang	16	6
201508	Eugene V. Koonin	16	1
211647	Simon Baron-Cohen	16	1
211892	YongKeun Park	16	1
212300	Nadin Rohland	16	1
212409	Fabian J. Theis	16	1
212867	Manuel A Rivas	16	3
206519	Philipp W Messer	16	3
203389	Yi Zhang	16	11
227552	William Noble	16	5
200504	Dmitri A Petrov	16	1
214434	Kenneth D. Harris	16	1
229861	Valentina Escott-Price	16	3
231625	Xin Chen	16	8
208152	Michael P Milham	16	1
216300	Neda Jahanshad	16	3
208285	Jonas Obleser	16	1
247439	Xavier Darzacq	15	1
204251	Jeffrey Hammerbacher	15	2
250941	Danielle Posthuma	15	2
208441	Leslie B Vosshall	15	1
288223	Merete Nordentoft	15	1
200321	Anna Murray	15	1
247423	Anubha Mahajan	15	1
201202	Jenny Tung	15	3
249898	Gregor Gorjanc	15	2
218401	John Quackenbush	15	1
250189	Mohit Kumar Jolly	15	2
204701	Arturo Casadevall	15	2
281607	Dominique Gravel	15	2
204739	David H. O'Connor	15	2
252971	Xiaoquan Wen	15	2
202434	Sang Hong Lee	15	3
257872	Leonid A. Mirny	15	1
219147	Catharine R Gale	15	3
274828	Suresh Neethirajan	15	2
202560	Kasper D. Hansen	15	2
286583	Chia-Yen Chen	15	2
201292	Florian Altermatt	15	2
241432	Hongyu Zhao	15	2
210196	Rafael Yuste	15	2
263624	Shweta Bansal	15	3
202591	Derrick W Crook	15	1
247315	Joachim Wittbrodt	15	1
220702	Pedro Beltrao	15	2
202694	Chris Wallace	15	4
210664	Pamela A Silver	15	2
202769	Bernie Devlin	15	1
205616	Yang Yang	15	11
211349	Meng Wang	15	8
202973	Alex Kentsis	15	2
202972	Zhiping Weng	15	2
206002	Emmanuel Barillot	15	1
212284	Jennifer A Doudna	15	2
206208	Louis Bernatchez	15	1
224821	Niko Beerenwinkel	15	1
224991	David A. Bennett	15	1
206483	Debora S. Marks	15	3
225833	Maxim Bazhenov	15	2
203326	Caroline Colijn	15	3
226516	David Haussler	15	2
206789	Marta Gut	15	2
213561	Matthias Mann	15	1
206821	Lei Wang	15	6
227533	Olli Raitakari	15	1
227891	Bo Li	15	6
228306	Wolfgang Haak	15	2
203598	Marc Salit	15	3
214482	Liam Paninski	15	2
203692	Sayan Mukherjee	15	1
229268	Tobias Kaufmann	15	1
203706	Roderic Guigo	15	2
229403	Arno Villringer	15	1
229765	Wei Ji Ma	15	1
203752	Xun Xu	15	1
200286	Christian Gieger	15	1
215078	Kate Tilling	15	1
201008	Niranjan Nagarajan	15	1
231225	Matthew J Simpson	15	1
203955	Richard M. Myers	15	1
203978	Erez Lieberman Aiden	15	1
215952	Jing Wang	15	11
201055	Marcus W Feldman	15	2
232850	Jeffrey T Leek	15	1
208273	Hakwan Lau	15	2
251151	23andMe Research Team	14	0
233881	Yun Li	14	6
247471	Alexis Battle	14	1
217024	Padmini Rangamani	14	2
253423	Amalio Telenti	14	3
200315	Unnur Thorsteinsdottir	14	1
263019	GTEx Consortium	14	0
217319	Li Zhang	14	8
271562	David A. Hinds	14	2
234793	Torsten Seemann	14	1
287383	Deborah A. Lawlor	14	1
217636	Robert T Knight	14	1
242947	John M. Starr	14	2
202298	Georgii A. Bazykin	14	3
257328	Peter J. Campbell	14	2
204622	Christina A Cuomo	14	1
250165	Davide Michieletto	14	2
202370	Edward M Marcotte	14	2
259759	Jeffrey C Barrett	14	2
200350	Brant C Faircloth	14	1
282838	Michel Loreau	14	2
219133	Stuart J Ritchie	14	1
288214	Jonas Bybjerg-Grauholm	14	1
202444	Panos Roussos	14	1
288156	Torben Hansen	14	1
219313	Chen Chen	14	9
257774	Ron Pinhasi	14	2
219573	Julien Gagneur	14	2
261733	Simon R Harris	14	2
219580	Fabian Theis	14	1
278447	Tom R Gaunt	14	1
202490	Fan Yang	14	11
251155	Andrew P Morris	14	4
210173	Gang Chen	14	4
281606	Timothée Poisot	14	3
220948	Ran Blekhman	14	1
253126	Fritz J. Sedlazeck	14	2
205306	Jonathan W. Pillow	14	1
252972	Francesca Luca	14	1
200392	Erol Akcay	14	1
254980	Patrick D Schloss	14	1
221416	Raquel E Gur	14	3
257514	Cole Trapnell	14	1
222362	Joanna M Wardlaw	14	1
259699	Sheng Wang	14	7
201469	Paul Turner	14	2
256376	Tobias Marschall	14	1
202965	Luca Pinello	14	2
288206	Katherine S Ruth	14	2
200815	Laurent Excoffier	14	2
212473	Terho Lehtimäki	14	2
224997	Cornelia M. van Duijn	14	2
212560	Johannes Kettunen	14	2
203232	Kirk E Lohmueller	14	2
206699	Yan Wang	14	7
206804	Alfonso Valencia	14	3
203517	Evan E Eichler	14	2
213941	Joo Heon Shin	14	1
228194	Sutirth Dey	14	1
214469	Philipp Berens	14	1
214520	Konrad P Kording	14	2
207432	Matthew Berriman	14	1
203740	Emmanouil T Dermitzakis	14	1
200981	Peter L Ralph	14	2
229860	Michael O'Donovan	14	2
215173	Douglas B. Kell	14	2
200109	Hilary Finucane	14	1
202012	Jing Zhang	14	8
216251	Xiao-Jing Wang	14	1
255055	Qi Wang	13	8
216694	Mauricio Barahona	13	1
252460	Ben Langmead	13	1
216762	Jie Zhang	13	11
248745	Ronald D Vale	13	2
233817	Simon E. Fisher	13	1
287024	Bruce M Psaty	13	2
204224	Kamil Slowikowski	13	3
253112	Farhad Hormozdiari	13	3
216930	Sara Mostafavi	13	2
261928	Matti Pirinen	13	1
217021	Jan Hasenauer	13	1
249593	Jakob Grove	13	1
217230	Gill Bejerano	13	1
296027	Samuel Gershman	13	3
200587	Darren J Obbard	13	1
279801	Brendan Bulik-Sullivan	13	2
234799	Benjamin P. Howden	13	1
253152	Bonnie Berger	13	2
235649	Srdjan Djurovic	13	2
249977	Norbert Perrimon	13	3
204609	Christophe Fraser	13	3
288142	Naveed Sattar	13	1
218366	David Basanta	13	3
255668	Jose Lourenco	13	2
204702	Hailiang Huang	13	1
255657	Jan-Willem Veening	13	2
209416	Hopi E. Hoekstra	13	2
247116	Eran Halperin	13	3
218898	Tao Zhang	13	9
249771	James S. Fraser	13	3
204802	Xiao Li	13	4
251004	Andre G Uitterlinden	13	1
219148	Mark E Bastin	13	1
254900	Zamin Iqbal	13	2
209710	Douglas W Yu	13	3
250638	Nilanjan Chatterjee	13	3
219452	Yu Wang	13	6
253266	Steven Salzberg	13	1
220132	Daniel S. Margulies	13	3
258852	Xin Liu	13	7
202570	Nicole Stoesser	13	1
250516	Bo Zhou	13	4
220356	Christof Koch	13	2
257066	Jared T Simpson	13	1
205144	Karel Svoboda	13	2
250915	Celeste Eng	13	1
205175	Antonio Benitez-Burraco	13	2
221415	Ruben C Gur	13	3
211016	Steven Kelly	13	1
211567	Alain Dagher	13	2
200778	Uri Obolski	13	2
206136	Oskar Hallatschek	13	1
212420	Arjun Raj	13	3
200826	Molly Przeworski	13	3
212564	Gad Abraham	13	1
225640	Jason B Mattingley	13	1
200443	Oliver G. Pybus	13	1
226619	Aaron M. Ellison	13	1
227239	Jianyang Zeng	13	3
227532	Jaakko Kaprio	13	1
213990	Ying Wang	13	9
200939	Dmitri Petrov	13	2
214283	Roberto Toro	13	2
228634	Jan H Veldink	13	1
200259	Konstantin Strauch	13	1
214397	Ravi Iyengar	13	1
228911	Sriram Sankararaman	13	3
229269	Nhat Trung Doan	13	2
229271	Yunpeng Wang	13	1
203705	Toni Gabaldon	13	2
229829	Simon Schultz	13	1
203816	Giovanni Coppola	13	2
231178	Alvis Brazma	13	1
200289	Peter Kraft	13	1
215885	John F. Marko	13	1
208000	Yi Wang	13	8
202044	Jun Li	13	10
208153	R Cameron Craddock	13	2
216246	Bradley Voytek	13	1
208119	Vince Calhoun	13	1
216355	Thomas E Nichols	13	3
248806	Tamir Gonen	12	3
208380	Peter Dayan	12	2
254277	Kenneth S. Kendler	12	1
216650	David A Baltrus	12	1
313324	Nancy L. Pedersen	12	1
208393	Olivier Collignon	12	3
253395	Xiaohui Xie	12	1
208420	Benjamin Becker	12	1
266915	Sekar Kathiresan	12	2
233818	Clyde Francks	12	1
251215	David Curtis	12	1
204241	Nir Hacohen	12	2
259357	Julien Bryois	12	2
208582	Matthias Bethge	12	3
289012	Rachel M. Freathy	12	2
217103	Changbong Hyeon	12	3
249450	David A Agard	12	1
234438	Nicola Low	12	1
269865	Patrick Sullivan	12	2
200062	Jean-Luc Jannink	12	3
288972	David M Evans	12	2
234808	Jin Li	12	5
253933	Jun Z Li	12	2
217695	Joern Diedrichsen	12	1
257146	Geoffrey Fudenberg	12	2
217725	Daniele Marinazzo	12	2
288207	Marcus A Tuke	12	1
217731	Orrin Devinsky	12	2
372534	Mohammad Ali Moni	12	1
217873	Thomas Bourgeron	12	2
242575	Joseph D. Buxbaum	12	1
200067	Montgomery Slatkin	12	1
257253	Monkol Lek	12	2
236465	M Arfan Ikram	12	1
252935	Melissa Gymrek	12	4
236737	Roshan Cools	12	2
281902	Colin J Carlson	12	1
218379	Jing Liu	12	3
290194	David M Hougaard	12	1
200204	Zoltan Kutalik	12	2
253488	Ditte Demontis	12	2
200638	Michael Lynch	12	2
241754	David M. Howard	12	2
209408	Santiago F Elena	12	1
247205	Inanc Birol	12	1
204748	Qian Wang	12	7
251400	Pierre Fontanillas	12	1
238276	Jude Gibson	12	1
259414	William David Hill	12	1
238279	Mark J Adams	12	1
251222	Jianxin Shi	12	3
202427	Allan F. McRae	12	1
253850	Stephen B. Montgomery	12	1
219134	Simon R Cox	12	1
253073	Susanna-Assunta Sansone	12	3
219145	Heather C Whalley	12	1
253110	Serghei Mangul	12	2
238589	John R. Yates	12	2
257453	Michel G. Nivard	12	1
201256	Shuhua Xu	12	2
253242	Serafim Batzoglou	12	1
200207	Claudia Langenberg	12	1
308130	Evie Stergiakouli	12	2
200216	Reedik Magi	12	2
256395	Francesco Iorio	12	3
201290	Emanuel A. Fronhofer	12	2
265010	Kasper Lage	12	2
210035	Qi Zhang	12	7
251523	Douglas M Ruderfer	12	2
220138	Matthew M. Botvinick	12	2
258822	Eric S Lander	12	2
240986	Michael A. Taffe	12	1
248340	Stephan Beck	12	1
210294	Yu Li	12	8
287034	Blair H Smith	12	1
202636	Aaron R Quinlan	12	4
253136	Brian C Thomas	12	2
201365	Arne Elofsson	12	1
261689	Carl Kingsford	12	1
220791	Peter Fraser	12	2
253625	Beate St Pourcain	12	2
220856	Li Chen	12	5
269639	Lei Chen	12	6
202668	Alicia R Martin	12	2
257601	Hidewaki Nakagawa	12	1
205270	Daniel H. Geschwind	12	1
252955	Han Fang	12	2
201367	Chaitanya S Gokhale	12	2
274987	Josh R Baxter	12	1
221072	Joshua S Bloom	12	1
263818	Goncalo R Abecasis	12	1
221158	Pascal Fries	12	1
249780	Michael I Love	12	2
221417	Theodore D Satterthwaite	12	2
247697	Louise M Judd	12	1
200389	Mikhail V Matz	12	2
249625	Satoru Miyano	12	2
222663	Elana J. Fertig	12	1
223091	Adam Claridge-Chang	12	1
223187	Ulman Lindenberger	12	2
200772	Fernando Racimo	12	1
223218	Joel E Kleinman	12	1
205823	Jamie Cate	12	1
211697	Lucas C Parra	12	1
201511	Jaroslav Flegr	12	1
203006	Matthew E Hurles	12	1
200793	Eric J. Alm	12	1
206003	Paul Macklin	12	3
206016	Herbert M Sauro	12	1
224062	Lisa DeBruine	12	1
206059	Jeff Gore	12	1
224300	Sebastien Gagneux	12	2
212341	Alexander van Oudenaarden	12	1
201592	Jacques Fellay	12	1
224925	Yang-Yu Liu	12	2
206255	Paul B Rainey	12	3
206263	Luis B Barreiro	12	2
225028	Stefano Palminteri	12	2
206301	David L. Stern	12	1
206479	Joshua B. Plotkin	12	1
206491	Remco Bouckaert	12	2
226260	Yong Wang	12	7
226269	Luke D. Lavis	12	1
226501	Arvind Kumar	12	5
203482	John A Todd	12	3
227534	Debbie A Lawlor	12	2
227550	Ferhat Ay	12	2
227733	Leif Groop	12	1
200921	Magnus Nordborg	12	1
213980	Yan Zhang	12	7
214349	Naotsugu Tsuchiya	12	2
228865	Nicole Soranzo	12	1
228967	Andrea Manica	12	1
207276	Hao Wu	12	7
214515	Alzheimer's Disease Neuroimaging Initiative	12	0
229300	Jordan W. Smoller	12	2
203723	Stephen Baker	12	2
214764	Hao Chen	12	8
229862	Daniel J Smith	12	1
200526	Joseph W Brown	12	2
207590	Ting Wang	12	7
203881	Temitope O.C. Faleye	12	1
203882	Moses Olubusuyi Adewumi	12	1
203993	Gene W Yeo	12	1
204015	Leonardo Collado-Torres	12	1
216078	Edward T. Bullmore	12	2
216197	Joachim Gross	12	3
216323	Barbara Franke	12	2
208205	Mark W Woolrich	12	1
208206	Michael Breakspear	12	2
267121	Howard Y. Chang	11	1
200186	Harald Grallert	11	1
251540	Charles G. Danko	11	1
233581	Ingrid Agartz	11	1
250998	Fernando Rivadeneira	11	1
233712	Michelle Luciano	11	1
315247	Henning Tiemeier	11	2
208421	Keith Kendrick	11	1
249901	John Hickey	11	1
233926	Timothy Verstynen	11	1
273516	Shimon Weiss	11	1
216957	Jens Nielsen	11	1
260880	Wenhong Zhang	11	2
208640	Simon B Eickhoff	11	2
250513	Kyle A Beauchamp	11	3
202238	Chung-I Wu	11	3
242070	Chao Wang	11	5
235667	Stephanie Le Hellard	11	1
248323	Rick Jansen	11	1
217888	Claudia Clopath	11	1
248837	Jianxing Song	11	1
236205	Weihai Ying	11	1
269781	Imran S. Haque	11	4
236480	Philippe Amouyel	11	1
286499	Dan E Arking	11	1
236485	Ke Hao	11	2
248231	Hugues Aschard	11	2
237366	Ming Li	11	7
247695	Kelly L Wyres	11	3
218580	Richard A. Gibbs	11	1
308876	Orjan Carlborg	11	2
218656	Katherine D McMahon	11	1
251534	Xuegong Zhang	11	1
204688	Paul Klenerman	11	2
261298	Mathieu Lupien	11	2
218752	Ed Lein	11	1
263437	Zhong Wang	11	3
218967	Krzysztof Gorgolewski	11	1
251128	Marc A. Marti-Renom	11	1
204797	Ying Li	11	5
255930	Andre Kahles	11	3
219113	Nathaniel D. Daw	11	1
302813	Olivier Pourquie	11	2
238515	Roel A. Ophoff	11	2
286267	James F Wilson	11	2
204813	Jay T Lennon	11	1
256181	Deanna M Church	11	4
219319	Rui Chen	11	4
247128	Buzz Baum	11	1
219618	Michael Boutros	11	2
251169	Cecilia M Lindgren	11	3
204973	Hui Wang	11	8
257725	Kristin Stewardson	11	1
219849	Heng Li	11	2
279532	Shaun Purcell	11	3
219940	Aaron E Darling	11	2
259629	Carole Ober	11	2
210021	Matthieu Gilson	11	1
250645	Fengtang Yang	11	1
210155	Wei Wei	11	6
253018	Christopher Yau	11	3
220861	Giulio Caravagna	11	2
277539	Gleb Kichaev	11	2
201371	Deepa Agashe	11	1
256592	Jonathan Coleman	11	2
221186	Xi-Nian Zuo	11	2
262070	William S Noble	11	3
221197	Nicholas B Turk-Browne	11	2
287386	Richa Saxena	11	3
205385	Jens Hjerling-Leffler	11	2
257145	Anton Goloborodko	11	2
200221	Thomas Meitinger	11	1
257159	Stephen Burgess	11	1
210897	Michael PH Stumpf	11	1
249611	Minh Duc Cao	11	2
221969	Paul P. Gardner	11	1
249472	Jacob E Corn	11	2
211010	Maitreya J. Dunham	11	2
261587	Tuuli Lappalainen	11	1
211184	Arndt von Haeseler	11	1
247523	Qiongshi Lu	11	3
205668	James C. Schnable	11	1
247736	Miguel Beato	11	3
222825	Yi Li	11	5
289139	Manuel Mattheisen	11	2
200143	Alexander Teumer	11	1
288867	Tom G Richardson	11	1
211656	Richard N Henson	11	1
250916	Esteban G Burchard	11	1
201505	Laurent Lehmann	11	1
257922	Shuo Zhang	11	3
202958	Justin C. Fay	11	2
253254	Daniel MacArthur	11	3
201509	Yuri I. Wolf	11	1
247564	Andrew B Ward	11	1
200238	Annette Peters	11	1
270110	Xiuqing Guo	11	1
224059	Amanda Hahn	11	2
259904	Jonathan Flint	11	2
212093	Julian M. Hibberd	11	1
257923	Wanliang Shi	11	1
224292	Sonia Borrell	11	2
245648	Abraham A Palmer	11	2
206158	Ryan D. Hernandez	11	2
253926	Christoph Bock	11	1
206205	Adam Siepel	11	2
257894	Gaurav Bhatia	11	3
224826	David P. Hughes	11	2
267546	M Elizabeth Halloran	11	2
212393	Su-In Lee	11	1
261913	Guo-Cheng Yuan	11	1
224833	Kirill S Korolev	11	3
273037	Thomas Friedrich	11	2
206224	Stephen I. Wright	11	2
256933	Bulent Arman Aksoy	11	2
212414	Lucas B Carey	11	1
251605	Jonathan S Weissman	11	1
203137	Chris Todd Hittinger	11	1
262626	Martin Maiers	11	2
212480	Olli T Raitakari	11	1
290402	Michael V Holmes	11	1
212520	Chad L Myers	11	2
257147	Nuno A Fonseca	11	2
225072	J. Andrew Pruszynski	11	1
253143	Abhinav Nellore	11	2
206412	Bart PHJ Thomma	11	1
200840	Richard E. Lenski	11	1
206429	Edward C Holmes	11	1
225766	Zhen Zhang	11	7
225830	Alessandro Bertolino	11	1
212948	M. Thomas P. Gilbert	11	1
212969	Eske Willerslev	11	1
212982	Robert M Waterhouse	11	1
201675	Andrew G. McAdam	11	1
200468	Stephen A. Smith	11	1
226355	Sven Bestmann	11	1
203357	Sebastian Duchene	11	1
213518	Karsten Suhre	11	2
227529	Terho Lehtimaki	11	1
227551	Jean-Philippe Vert	11	3
213984	Wei Zhou	11	4
228054	Qin Ma	11	2
203557	Maarten Speekenbrink	11	1
201837	Tomas Marques-Bonet	11	1
200497	Alexander Herbig	11	2
214514	Pierre Bellec	11	2
229267	Dag Alnaes	11	1
229675	Jonathan Z Simon	11	1
214840	CRISTOBAL UAUY	11	1
200287	Vilmundur Gudnason	11	2
201937	Scott T Weiss	11	1
215167	Nathan D. Price	11	2
203866	Sandeep Chakraborty	11	1
230555	Steven A McCarroll	11	1
207670	Julius Lucks	11	2
230687	Rahul Satija	11	1
203877	John Marioni	11	1
203884	Johnson Adekunle Adeniji	11	1
203902	Nicholas J Croucher	11	1
215638	Gilles van Wezel	11	1
231411	Ying Chen	11	6
231901	Jan Ellenberg	11	1
216088	Alan Anticevic	11	1
232335	Sebastian Schreiber	11	1
200552	Chris Tyler-Smith	11	1
216092	Carlos D. Brody	11	1
216149	Matteo Pellegrini	11	2
216138	Stephen M. Smith	11	1
216262	Dante Mantini	11	2
201067	Lei Sun	11	6
216468	Michael J. MacCoss	11	2
259933	Olivier Delaneau	10	2
204290	Fan Zhang	10	7
252979	Rolf Backofen	10	1
208528	Cam-CAN	10	0
303417	Jeffrey West	10	2
234376	Edward Goldstein	10	1
248015	Alan Cooper	10	1
234431	Sunetra Gupta	10	1
272105	Xuanyao Liu	10	3
201123	Sylvain Glemin	10	3
273513	Antonino Ingargiola	10	2
204324	Gordon Dougan	10	2
250730	John RB Perry	10	2
234663	Junhyong Kim	10	1
307605	Niel Hens	10	1
234802	Timothy P. Stinear	10	1
250106	Matthew C. Keller	10	2
208655	Boris Gutkin	10	1
250914	Donglei Hu	10	1
208719	Bo Wang	10	6
251161	Robin Beaumont	10	2
217715	Kendrick N Kay	10	3
281915	Wayne M Getz	10	1
235653	Thomas Espeseth	10	2
254941	A Sarah Walker	10	2
217735	Eric Halgren	10	1
250028	Hans-Peter Grossart	10	1
235688	Vidar M. Steen	10	2
250110	Ron Shamir	10	1
235755	David Holcman	10	1
271491	Anastassis Perrakis	10	1
217799	Ting Xu	10	5
267722	Stephen S Rich	10	2
217846	Jean-Baptiste Poline	10	1
314577	Paul Lichtenstein	10	1
204507	Aziz Aboobaker	10	1
258653	Carlos Bustamante	10	2
236143	Mark Adams	10	3
293155	Christian Eggeling	10	1
236132	Ahmad R Hariri	10	2
308371	Najaf Amin	10	1
236356	Myriam Fornage	10	1
254484	Fang Chen	10	2
236371	Sudha Seshadri	10	2
253421	Pejman Mohammadi	10	1
218330	Jason Papin	10	1
254886	Ivo Mueller	10	2
200625	Shinichi Nakagawa	10	2
306980	Rebecca Richmond	10	1
204634	Alex Hewitt	10	1
279521	Giulio Genovese	10	2
202398	Shamil R. Sunyaev	10	2
271844	Jochen Guck	10	1
218862	Angus I. Lamond	10	1
279802	Verneri Anttila	10	2
218863	Martin Hemberg	10	3
263257	Ewan Birney	10	1
201234	Ary A Hoffmann	10	1
285732	Nelson B. Freimer	10	1
200135	Lavinia Paternoster	10	2
313668	Ira M Longini	10	1
219136	Michael V Lombardo	10	1
259726	Karsten Rippe	10	2
219207	Anthony M Zador	10	1
250048	Nils Gehlenborg	10	1
219208	Nicholas Steinmetz	10	2
250610	Robin N Beaumont	10	2
238819	Jonathan Marchini	10	1
263691	Marc Jan Bonder	10	2
239006	Bo Liu	10	4
259060	Hector Corrada Bravo	10	1
239490	Kun Zhang	10	3
263612	Francois Nedelec	10	2
209870	Xin Zhou	10	5
260100	Alexander L. Greninger	10	3
209874	Lei Zhang	10	5
288146	Gudmar Thorleifsson	10	2
239718	Elliott Rees	10	2
260080	Chris S Haley	10	2
204980	Feng Liu	10	6
262871	Gary A Churchill	10	2
219866	Feng Gao	10	5
259146	Terence P Speed	10	1
219963	Fang-Cheng Yeh	10	2
247419	Gota Morota	10	3
205069	Jonathan Winawer	10	1
278163	Christian Mosimann	10	1
240831	Kai Zhang	10	3
289146	Sven Cichon	10	3
202575	Robert Sebra	10	2
288100	Niels Grarup	10	1
220418	Thomas Nichols	10	2
260079	Alison D Murray	10	1
210240	Sterling C. Johnson	10	1
248315	Hyun Min Kang	10	1
202637	Brent S Pedersen	10	1
241492	Michael S Kobor	10	1
220849	Christian L Althaus	10	2
263791	Lincoln D. Stein	10	2
220860	Alex Graudenzi	10	1
255932	Gunnar Raetsch	10	3
210506	Victor Guryev	10	2
267346	Fiona M Watt	10	1
202671	Genevieve L Wojcik	10	1
263636	Christopher E Mason	10	2
221248	Richard F Betzel	10	2
254229	Loic Yengo	10	2
202692	Binay Panda	10	1
264299	Eduardo Eyras	10	1
210700	Chris P Barnes	10	1
264543	Maxim Imakaev	10	2
221424	Wilfried Haerty	10	1
248676	Laurence Florens	10	1
200722	Joshua S Weitz	10	1
265078	Jakob Skou Pedersen	10	1
202733	Chiara Sabatti	10	1
249656	Wesley K Thompson	10	2
205388	Lu Yang	10	4
281774	Ignasi Bartomeus	10	1
200725	Sam P Brown	10	1
250728	Robert A Scott	10	2
205416	Jakob Seidlitz	10	2
249823	Rob Knight	10	1
200726	William C Ratcliff	10	3
247186	Malachi Griffith	10	2
201403	Min Wu	10	6
247185	Obi L Griffith	10	3
210844	Tom Ellis	10	1
253101	Lars Lind	10	1
210906	Marianne Rooman	10	1
253049	Liqing Zhang	10	2
210907	Fabrizio Pucci	10	1
248729	Michael Schatz	10	3
221840	Saurabh Sinha	10	1
308421	Jouke-Jan Hottenga	10	2
201423	Uri Alon	10	2
249590	Jo Knight	10	2
202770	Kathryn Roeder	10	2
248836	Liangzhong Lim	10	1
221911	Nathan E Lewis	10	1
253091	Andrea Ganna	10	2
210988	Eugene I. Shakhnovich	10	2
327487	Alfonso Martinez Arias	10	2
200225	Lili Milani	10	1
275314	Jan Huisken	10	2
200746	Li Jin	10	2
266859	Eli Stahl	10	2
222384	Morten L Kringelbach	10	2
281723	Bernhard Schmid	10	2
222581	David Swarbreck	10	1
250955	Xin He	10	3
200756	Shi Huang	10	2
263390	Cisca Wijmenga	10	1
205688	Benjamin Schwessinger	10	3
253605	Brian Oliver	10	3
211469	Uwe Ohler	10	1
211476	Thomas C. Friedrich	10	2
223023	James A. Knowles	10	1
223135	Vijay Balasubramanian	10	1
202920	Paul Keim	10	2
211563	Yashar Zeighami	10	3
223215	Thomas M Hyde	10	1
223259	R Todd Constable	10	1
205830	Georg Seelig	10	1
211890	SangYun Lee	10	1
223822	William P Hanage	10	2
206005	Eduardo Sontag	10	2
206067	Andrew J Millar	10	1
206098	John C. Marioni	10	2
224423	Fred Wolf	10	2
206173	Ron Do	10	2
212331	Jordi Garcia-Ojalvo	10	1
212337	Lei Xie	10	2
224782	Brenna M Henn	10	2
212384	Traver Hart	10	2
206232	Sergei Maslov	10	2
224959	Alain Destexhe	10	1
212459	Ling-Hong Hung	10	2
212472	Mika Kähönen	10	1
225067	Nicholas M. Luscombe	10	2
212563	Aki S Havulinna	10	2
200448	Andreas Hejnol	10	1
212606	Wei Yang	10	7
225545	D. Louis Collins	10	1
206465	Ian Dworkin	10	2
225935	Tomoki Fukai	10	1
201672	Ben Dantzer	10	1
203313	Maxime Galan	10	3
226194	Leslie M Loew	10	2
226340	Meng Li	10	5
226348	Liang Chen	10	7
203332	Alexei J Drummond	10	1
213238	M Ida Gobbini	10	3
213231	Thilo Womelsdorf	10	2
203365	Stephen Smith	10	3
201730	Ning Li	10	6
226686	Yang Zhang	10	5
227013	Anne E Carpenter	10	1
203426	Kathryn L Evans	10	2
206803	Ivo Gut	10	3
206805	Willem H. Ouwehand	10	1
227238	Tao Jiang	10	3
227402	Henning Hermjakob	10	2
227528	Mika Kahonen	10	1
206954	Xiao Liu	10	4
200908	Jeremy Schmutz	10	2
213987	Jun Chen	10	5
228143	Guillaume Achaz	10	3
200944	Bin Wu	10	6
214522	Evelina Fedorenko	10	2
229272	Francesco Bettella	10	1
203678	Noah A Rosenberg	10	1
203699	Rory Johnson	10	3
200971	Gáspár Jékely	10	2
229698	Daniel Geschwind	10	2
229849	Joey Ward	10	1
214929	Jef D. Boeke	10	3
230227	Bratislav Misic	10	1
230228	Deborah Talmi	10	1
230289	Dennis van der Meer	10	1
215148	Heiko Enderling	10	1
215193	Paul K. Newton	10	2
200523	Martin A Nowak	10	1
201953	J. Craig Venter	10	1
200295	Ozren Polasek	10	1
230977	Dick de Ridder	10	1
231016	David Koslicki	10	1
200296	David Porteous	10	1
231230	Adam M Deutschbauer	10	1
231246	Robert Hoehndorf	10	1
231404	Ziv Bar-Joseph	10	1
231504	Wei Wu	10	5
215741	Lin Wang	10	7
215777	Tom Misteli	10	1
207996	Tao Liu	10	5
204048	Ricardo Henriques	10	1
216086	John D. Murray	10	1
232336	Stephan Schiffels	10	2
232337	Ville Mustonen	10	3
216104	Feng Li	10	4
232357	Pavel Tomancak	10	1
216118	Albert Cardona	10	1
216120	Stefan Mihalas	10	1
200180	Luigi Ferrucci	10	1
232598	Simon Cervenka	10	1
216257	David C Van Essen	10	1
200556	Andrew D Kern	10	2
216317	John Blangero	10	3
216351	Margaret J Wright	10	1
233207	Christopher B. Burge	10	1
208297	Dimitri M Kullmann	10	2
216620	Wei Liu	10	8
233405	James J DiCarlo	10	2
247210	Chunyu Liu	9	3
233560	Yannick Schwab	9	2
288318	Johan G. Eriksson	9	1
233726	Bernard Mazoyer	9	4
262132	Dan L Nicolae	9	1
208416	Weihua Zhao	9	3
288343	Dan Rujescu	9	1
208417	Feng Zhou	9	4
252477	G Sampath	9	1
234012	Benedict C Jones	9	1
256364	Paul Medvedev	9	1
208515	David H Brainard	9	1
244710	Andrew C Heath	9	2
200579	Nicolas Bierne	9	2
286284	Shaun M. Purcell	9	2
234354	Anna M Stewart-Ibarra	9	2
281603	W. John Edmunds	9	1
217232	Pär K Ingvarsson	9	3
270112	Yongmei Liu	9	1
217250	Sissel Jentoft	9	1
278444	Richard M Martin	9	1
234738	Jun Zhao	9	6
278445	Caroline Relton	9	1
208650	Krishna V Shenoy	9	1
264996	Kresten Lindorff-Larsen	9	1
217364	Hui Liu	9	7
309186	Elise B Robinson	9	3
200602	W. Owen McMillan	9	1
281689	Ethan P White	9	2
217654	J. Swaroop Guntupalli	9	4
251533	Anthony Mathelier	9	2
201155	Nadav Ahituv	9	1
269625	John D. Storey	9	1
217899	B.T. Thomas Yeo	9	2
250803	Dennis Lal	9	2
236094	Xiao Chen	9	4
257234	Duncan T. Odom	9	1
236200	Mingchao Zhang	9	1
257237	William Stafford Noble	9	4
236203	Yujia Li	9	1
280257	Margaret L Gardel	9	1
202314	Qi Zhou	9	2
287384	Martin K. Rutter	9	2
236484	Carlos Cruchaga	9	1
296538	Anders Borglum	9	2
204608	Rory Bowden	9	1
251487	John D Blischak	9	2
218328	David Pincus	9	1
247155	Robert C Edgar	9	1
200128	Massimo Mangino	9	1
250578	Lynsey S Hall	9	3
218368	Hao Li	9	4
256436	Pekka Marttinen	9	1
209269	David Posada	9	1
253135	Matthew R Olm	9	2
218570	Donna M. Muzny	9	1
256182	Richard K Wilson	9	2
218652	Tanja Woyke	9	2
267414	Jiankui He	9	4
218654	Stefan Bertilsson	9	1
258823	J. Keith Joung	9	2
237622	John T Serences	9	1
288144	Kent D Taylor	9	1
237758	Chun Chieh Fan	9	2
265088	Gustavo Glusman	9	2
200637	Reed A Cartwright	9	1
308251	Chris Cotsapas	9	2
209413	Matthieu Foll	9	2
263695	Alexander Dilthey	9	4
201225	Anthony A Hyman	9	1
281739	Justin Lessler	9	1
219049	David R. Roalf	9	2
244586	Wolfgang Maier	9	2
202433	Jacob Gratten	9	2
257921	Jie Feng	9	1
202441	Joseph R. Ecker	9	1
302879	Didier Y.R. Stainier	9	1
204854	Qin Xu	9	1
257331	Lin Liu	9	6
239180	Yan Liu	9	5
248268	Christopher D Brown	9	3
209766	Xu Zhang	9	3
308324	André G. Uitterlinden	9	1
201275	Gerton Lunter	9	2
250680	Peter Holmans	9	2
202497	Jie Chen	9	7
286279	Menachem Fromer	9	2
201276	Oliver Pybus	9	1
248886	William J Zuercher	9	1
209980	Nicole Wenderoth	9	1
296549	Sarah J Lewis	9	2
210090	Edward S Boyden	9	1
265613	Krista Fischer	9	1
210095	Bosiljka Tasic	9	1
254934	Matthew Loose	9	1
202559	Andrew P. Feinberg	9	1
281598	Sebastian Funk	9	1
220210	Tomas Paus	9	2
253079	Philippe Rocca-Serra	9	1
220280	Bradley C Love	9	2
332765	William Valdar	9	1
205172	Peter König	9	1
269260	Daniel F. Gudbjartsson	9	2
201345	Claudia Bank	9	2
264076	Nikolas Pontikos	9	4
220739	Alexander Marson	9	1
261445	Andre Franke	9	2
202649	Leopold Parts	9	2
251255	Jonathan Mill	9	1
220863	Marco Antoniotti	9	2
261193	Andrew J Page	9	1
220884	Moritz Gerstung	9	1
249572	Justin B Kinney	9	1
210463	Kris Gevaert	9	3
255010	Stephen P Diggle	9	3
220888	Christian Beisel	9	1
248069	Pardis C Sabeti	9	1
202676	Neeraja M Krishnan	9	1
280228	L Mahadevan	9	2
200706	Laura Kubatko	9	2
320990	Timothy E Saunders	9	1
210592	Jie Liu	9	5
280832	Bridget Carragher	9	1
221359	Olivier Marre	9	2
261545	Alexander J. Nederbragt	9	1
221379	Bruce L Miller	9	2
267590	Mick Watson	9	1
221412	Kosha Ruparel	9	2
251252	Benjamin W Domingue	9	2
221461	Michael W Cole	9	3
263098	Jennifer A Brody	9	1
202720	Geir Kjetil Sandve	9	1
267602	Yang Wu	9	3
221470	Gregory S. X. E. Jefferis	9	1
251372	George Dedoussis	9	2
201393	Timothy B Sackton	9	3
262142	James G Wilson	9	1
202729	Edward H. Morrow	9	1
254782	Christopher Quince	9	1
210861	Osamu Nureki	9	2
257717	Eadaoin Harney	9	3
202776	John T Lis	9	2
263906	Peter K Rogan	9	1
202799	Sridhar Hannenhalli	9	1
277371	Nikolaus Schultz	9	2
202803	Yutaka Suzuki	9	1
285048	David Torrents	9	1
201449	Michael DeGiorgio	9	1
252186	Yu Chen	9	6
211357	Jun Wang	9	7
264195	Jin Zhang	9	8
222722	Dawn L DeMeo	9	1
253752	Houtan Noushmehr	9	2
202893	Gert Woerheide	9	1
249660	Xia Shen	9	3
211379	Andreas Keller	9	3
247298	Lutz Fischer	9	2
222867	Christopher Mungall	9	1
286866	Ulf Gyllensten	9	1
222908	Ben Phillips	9	1
316568	Sarangam Majumdar	9	1
200235	Sandosh Padmanabhan	9	1
267059	Cristen J. Willer	9	1
223021	Dan J. Stein	9	1
249612	Devika Ganesamoorthy	9	1
223025	Lea K. Davis	9	2
314329	Yanni Zeng	9	3
223053	Chang Liu	9	4
281814	Erin A Mordecai	9	1
211531	Katrien Segaert	9	1
266946	Konrad J. Karczewski	9	1
211555	Russell T Shinohara	9	2
266944	Kaitlin E. Samocha	9	2
223137	Gunnar Blohm	9	1
249875	Michael M. Hoffman	9	1
223199	Mark G. Baxter	9	1
258859	Bas E. Dutilh	9	1
223211	Ran Tao	9	1
266939	Mingyao Li	9	2
211661	Ole Jensen	9	1
266914	Pradeep Natarajan	9	1
200786	George H Perry	9	1
250982	Aysu Okbay	9	3
223661	David M Gilbert	9	1
253194	Joshua W. K. Ho	9	2
205938	Matthias Kretzler	9	2
257104	Chen-Shan Chin	9	2
201530	Michael Ailion	9	1
256185	Fabien Campagne	9	1
211882	Richard Harrison	9	1
261195	Jacqueline A. Keane	9	1
205981	Vassily Hatzimanikatis	9	1
254275	Aiden Corvin	9	1
211926	Daniel Croll	9	2
267695	Eric R Gamazon	9	4
200148	Sven Bergmann	9	1
265958	Alexandr A. Kalinin	9	1
223998	Ke Xu	9	1
212077	Di Wu	9	6
212270	Domitilla Del Vecchio	9	1
206170	Douglas G Scofield	9	1
212442	Samuel Friedman	9	3
225071	Paul L. Gribble	9	1
225109	Charan Ranganath	9	1
225127	Zhongming Liu	9	1
225148	Mitsuo Kawato	9	1
200833	Michael M Desai	9	2
225189	Claus C. Hilgetag	9	2
225238	Dimitrios Pantazis	9	1
200071	Christian von Mering	9	1
225297	Paul Pavlidis	9	2
225327	Tomas Knapen	9	2
212869	Thomas Walker	9	2
225795	Christopher Brown	9	3
201644	Angus Buckling	9	1
212921	Jean-Marc Aury	9	1
206530	Joseph Powell	9	2
226095	Vince D. Calhoun	9	1
201671	Stan Boutin	9	1
226153	Benjamin Hayden	9	1
226278	Kyoohyun Kim	9	3
203321	Nathalie Charbonnel	9	2
226329	Arturo Tozzi	9	1
203333	Yi Hu	9	4
213234	Eleanor A. Maguire	9	1
226529	Kalanit Grill-Spector	9	1
201712	Luay Nakhleh	9	2
206672	Jonathan Dushoff	9	1
200159	Harry Campbell	9	0
201721	Mathieu Joron	9	1
227006	Shantanu Singh	9	1
227199	Eric Schadt	9	1
203443	Markus Pfenninger	9	2
206873	Ka Yee Yeung	9	1
227493	Hong Wang	9	6
227758	John B Hogenesch	9	3
227957	Olivier Gevaert	9	1
201797	Aurelien Tellier	9	1
201800	Stephan Peischl	9	3
207071	Lei Liu	9	7
228314	Mario Novak	9	1
203597	Justin M Zook	9	2
203599	Arend Sidow	9	1
203605	Santhosh Girirajan	9	1
201838	Philip Gerlee	9	1
228859	Erik Garrison	9	3
214483	Marius Pachitariu	9	1
203652	C Titus Brown	9	2
214493	Andreas S. Tolias	9	1
229139	Tobias H. Donner	9	1
203675	Peter D Keightley	9	1
214567	Jie Wang	9	7
229273	Torgeir Moberget	9	2
229418	Eric Gouaux	9	1
201883	Samuel J Gershman	9	1
203731	Alfonso Buil	9	2
207473	Na Li	9	9
200983	Andrew Rambaut	9	1
214928	David Fenyo	9	3
207544	Santiago Schnell	9	1
230258	Venkatesh N Murthy	9	1
215088	Peter Sorger	9	1
215234	Ming Hu	9	3
207697	Wolfgang Wagner	9	1
203873	Philipp Schiffer	9	1
231179	David J. Adams	9	1
231180	Lodewyk Wessels	9	1
215571	Vineet Bafna	9	3
203942	Ivan Iossifov	9	1
203985	Xiao Wang	9	3
216038	Petra Ritter	9	1
216073	Raymond J. Dolan	9	1
216131	Diego Vidaurre	9	2
216221	Terrence J Sejnowski	9	2
216252	Matthew F Glasser	9	1
216266	Alex Fornito	9	1
216295	Surya Ganguli	9	1
201072	Sebastian Bonhoeffer	9	1
232843	Qiang Chen	9	3
216354	David C Glahn	9	1
216401	Hui Jiang	9	3
232964	Stanislas Dehaene	9	1
216578	Chao Chen	9	7
247460	Nezar Abdennur	8	1
208358	Malte Woestmann	8	2
251535	Kateryna Makova	8	2
204193	Atul J. Butte	8	1
267337	Michael E. Talkowski	8	3
204227	Deepak A. Rao	8	2
266217	Robin Andersson	8	1
204221	Satyajit Mayor	8	1
256195	Melanie Bahlo	8	1
216790	Martin Michaelis	8	1
252967	Gerard D. Schellenberg	8	1
233910	Olivier George	8	1
269918	Konrad Karczewski	8	1
216876	Li Xie	8	3
259137	Peng Yu	8	2
234091	Bernhard Y Renard	8	1
252975	Björn Grüning	8	2
202173	Torgeir R. Hvidsten	8	1
288775	the 23andMe Research Team	8	0
217031	Stefan Zdraljevic	8	1
308263	Tim D Spector	8	1
234266	Randy Schekman	8	1
257325	Peter Van Loo	8	1
217038	Michiel Vermeulen	8	2
253274	Sandrine Dudoit	8	1
234353	Catherine A Lippi	8	1
288957	Evangelos Evangelou	8	1
202179	Vaughn S Cooper	8	2
258177	Paul C Blainey	8	2
234444	Vittoria Colizza	8	1
278906	Tamar Sofer	8	2
208579	Alexander S Ecker	8	1
262771	Iman Hajirasouliha	8	1
217223	Thomas Bataillon	8	2
253769	Han Cao	8	1
217220	Samuel Alizon	8	1
250117	Belinda Phipson	8	2
217231	Nathaniel R Street	8	1
315095	Jennifer A. Smith	8	1
234685	Julie Overbaugh	8	1
250983	Patrick Turley	8	2
200592	Jan Albert	8	1
254214	Dirk S Paul	8	2
217328	Min Chen	8	6
314258	Hilary K Finucane	8	2
217420	Han Chen	8	4
288993	Ville Karhunen	8	1
217546	Maximilian Haeussler	8	1
284212	Stefan Flasche	8	1
217563	Kenneth S Kosik	8	3
316247	Chris A Brackley	8	2
217622	Rufin VanRullen	8	2
270113	Heather E Wheeler	8	2
200328	Brian P Dilkes	8	1
252508	Peter J Park	8	2
200601	Camilo Salazar	8	2
308151	Nicholas Mancuso	8	2
217686	David W Tank	8	1
284502	Jason R Rohr	8	1
217713	Martin Vinck	8	3
292613	Joachim Goedhart	8	1
235672	Ingrid Melle	8	1
328133	Jason Robert Rohr	8	1
202261	Sara Magalhaes	8	1
255322	Cees Dekker	8	1
201170	Pierre-Alexandre Gagnaire	8	3
266613	Nuno R. Faria	8	1
217868	Zdenka Pausova	8	2
255836	Xiaobo Zhou	8	2
200614	Brigitte Pakendorf	8	1
256039	Guillaume Filion	8	2
204535	Adam J Bewick	8	1
259978	Peter Donnelly	8	1
204537	Allen J Moore	8	1
256618	Michael R Wilson	8	1
202295	Shin-Han Shiu	8	1
256206	Anne Senabouth	8	1
236358	Reinhold Schmidt	8	1
257184	Huwenbo Shi	8	1
209092	Jeffrey E. Barrick	8	2
251658	Wipapat Kladwang	8	1
204595	Matthew Hall	8	3
278493	Michael P Snyder	8	1
218295	Cong Trinh	8	1
253226	Christoph Ziegenhain	8	2
204621	Francois Balloux	8	1
249594	Anders Boerglum	8	1
218399	Kimberly Glass	8	1
247441	Robert Tjian	8	2
218400	Edwin K Silverman	8	2
255382	Raghuveer Parthasarathy	8	1
200338	Bastiaan T. Heijmans	8	1
288155	Oluf Pedersen	8	1
201208	Tim Coulson	8	2
307828	Alex Perkins	8	1
237199	Michael J Kahana	8	2
259589	Hanlee P. Ji	8	2
218503	Nicolas Salamin	8	1
289026	Tarunveer S. Ahluwalia	8	3
218548	Hugh M. Robertson	8	2
250515	Dale Muzzey	8	2
200124	Robert Karlsson	8	1
317798	Edward T Eng	8	1
218631	David L Adelson	8	1
277389	Nancy J. Cox	8	1
218789	Yuan Yuan	8	6
325896	Andrea M Weiler	8	2
218814	Lin Yang	8	4
251399	Sandra Sanchez-Roige	8	1
204736	Saverio Capuano	8	1
268389	George O'Toole	8	1
218995	James B Rowe	8	1
250633	John G. Doench	8	1
219018	Jan-Mathijs Schoffelen	8	2
289750	Daniel I Chasman	8	1
219048	Christian K. Tamnes	8	1
265285	Hans Bisgaard	8	1
219109	Bruno Rossion	8	1
251918	Irini Topalidou	8	2
201249	Joachim Hermisson	8	1
266959	Peter Campbell	8	1
219202	Justus M Kebschull	8	2
282755	Olivier Gimenez	8	1
202443	Gabriel E Hoffman	8	1
253124	Maria Nattestad	8	1
238848	Yong Li	8	4
262090	Iain G. Johnston	8	3
204851	Li-Li Tan	8	1
286285	Eli Ayumi Stahl	8	1
204855	Qing-Ping Zeng	8	1
251810	Ilya J Finkelstein	8	1
239403	Gary Donohoe	8	1
278905	Cathy C. Laurie	8	2
201273	Daniel R. Matute	8	1
267252	David C. Wedge	8	2
219603	Mercedes Pascual	8	1
267336	Edwin Cuppen	8	3
202499	Jie Li	8	6
246220	Joel Gelernter	8	1
239633	Robert B Darnell	8	3
253078	Alejandra Gonzalez-Beltran	8	1
239636	Cristin McCabe	8	1
268356	Tracy Palmer	8	2
219705	Jussi Taipale	8	1
250672	Michael Gill	8	1
239724	Ian Jones	8	2
263110	Halit Ongen	8	1
239725	George Kirov	8	1
248810	Altuna Akalin	8	2
219732	Eran Segal	8	1
307393	Gemma C. Sharp	8	1
204963	Danny Reinberg	8	1
242782	Min Li	8	4
239976	Kathryn A Davis	8	2
285064	Paul Bertone	8	2
219851	Shamil Sunyaev	8	1
274257	Jun Zhang	8	6
219897	Elhanan Borenstein	8	2
274038	Gregory A Voth	8	1
209964	Jerome Sallet	8	1
251249	Daniel W Belsky	8	3
240171	Tom Francart	8	2
272914	Frank DiMaio	8	2
220005	Oscar Esteban	8	1
251210	Seunggeun Lee	8	1
210029	Eric Shea-Brown	8	1
255336	Daniel J Turner	8	2
220045	Sean G Megason	8	2
251383	Nicole King	8	1
220098	Janice Chen	8	2
272106	Scott Huntsman	8	2
220131	Jonathan Smallwood	8	1
255810	Bhismadev Chakrabarti	8	1
220209	Arno Klein	8	2
298936	Justin D. Lathia	8	1
210149	Maurizio Corbetta	8	3
250944	Ole Andreassen	8	2
210163	Frederick P Roth	8	2
263521	Tom Gaunt	8	1
220334	David Feng	8	1
266961	Rameen Beroukhim	8	2
240982	Jacques D. Nguyen	8	1
257449	Abdel Abdellaoui	8	3
220375	Guillaume Sescousse	8	2
261238	Yilong Li	8	3
220406	Karl Deisseroth	8	1
314571	Joanna Martin	8	1
210313	Jack A Gilbert	8	2
257640	David A. Knowles	8	2
200092	Chunlei Wu	8	2
315135	Ioanna Tzoulaki	8	1
202631	Eric E. Schadt	8	2
267641	Jonas Korlach	8	2
220831	Gustavo Stolovitzky	8	1
308365	Tamara B. Harris	8	2
200378	Doris Bachtrog	8	1
249255	Yong Xiong	8	1
205247	Jason P Lerch	8	2
277977	Joshua C Bis	8	2
220929	Aravind Subramanian	8	1
322233	Adam Kucharski	8	1
220995	Asger Hobolth	8	1
257695	Iosif Lazaridis	8	1
202670	Raymond K Walters	8	1
251069	Hugh Watkins	8	1
202673	Simon Gravel	8	1
287091	Helen V Firth	8	1
210571	Humberto J Debat	8	1
251387	Stephen J Bush	8	2
221149	Minoru Koyama	8	2
254219	Thomas Manke	8	1
210630	Mustafa Khammash	8	1
255920	Petr Smirnov	8	2
221196	Anna C Schapiro	8	1
262251	Nancy R Zhang	8	1
210647	Ricard Sole	8	1
287358	Jacqueline M. Lane	8	1
202710	Bastian Fromm	8	2
258839	Christina Boucher	8	4
221441	Mehrdad Jazayeri	8	1
280967	Sjors Scheres	8	1
202719	Eivind Hovig	8	1
328587	Wei Zheng	8	3
221480	Chuan He	8	1
254952	Michael Wagner	8	3
221505	Nathan M Springer	8	1
261982	Dong Li	8	3
202744	Sohrab Shah	8	1
263847	Rachel Karchin	8	1
210882	Li Ma	8	5
250991	Kaitlin H Wade	8	1
210902	Yuri Eidelman	8	1
251002	Oscar H Franco	8	1
210905	Sergey Andreev	8	1
250715	Felix R Day	8	1
211025	Richard McElreath	8	2
252557	Benedikt Brors	8	2
211046	Peter F Stadler	8	2
287534	Louise V Wain	8	4
202812	Lexiang Ji	8	1
248859	Raphael Levy	8	1
202818	Xiaoyu Zhang	8	5
253678	Dominic Kwiatkowski	8	1
222270	Hanchuan Peng	8	2
249973	Yanhui Hu	8	2
222275	Xiang Li	8	4
249916	Jian Ma	8	2
201455	Stephane Aris-Brosou	8	1
254485	Bin Li	8	6
205641	Georg Jander	8	2
261446	Abbas Dehghan	8	2
222658	Loyal A. Goff	8	1
298352	Artem Kaznatcheev	8	2
202868	Kerstin Howe	8	2
267790	Maud Fagny	8	2
222909	T. Alex Perkins	8	1
267057	Kristian Hveem	8	1
222947	Luca Ferretti	8	1
273465	Nikolaus Grigorieff	8	1
222954	Vincent J. Lynch	8	1
267403	Bin Liu	8	6
205759	Vincent Noireaux	8	1
250063	Levi Waldron	8	3
205761	Alejandro Chavez	8	1
257712	Matthew Ferry	8	2
200773	Jeremy J. Berg	8	2
259792	Michael E Goddard	8	2
223072	Seth Blackshaw	8	2
254280	Silviu-Alin Bacanu	8	2
211560	Mahsa Dadar	8	2
280530	Taekjip Ha	8	1
211588	Eve Marder	8	1
263889	Riccardo Marioni	8	2
223189	Markus Werkle-Bergner	8	1
260443	James B McKinlay	8	1
200779	Judith Berman	8	3
263530	Ying Wu	8	3
223435	Michael Seidl	8	1
282457	Philipp M Altrock	8	2
211716	Alessandro Torcini	8	3
253153	Jian Peng	8	1
223532	Feng Wang	8	4
253228	Wolfgang Enard	8	2
200420	Christian D Huber	8	2
263206	Mathew J Garnett	8	1
223679	Jose Davila-Velderrain	8	3
253271	Charlotte Soneson	8	3
200792	Ramnik J. Xavier	8	2
260217	Olivier Harismendy	8	1
223762	Lorenz Wernisch	8	1
248626	Lin Li	8	7
200240	Paul Pharoah	8	1
260230	Yi Yang	8	6
200424	Ren Sun	8	1
256211	Quan Nguyen	8	1
205988	Mingyang Lu	8	3
259949	Charles Y Chiu	8	1
224002	Antonia Monteiro	8	1
266885	Guillaume Bourque	8	1
206031	Bogdan Budnik	8	1
258775	Ping Zeng	8	2
206045	Zachary Andrew King	8	2
262719	Bin Chen	8	5
224202	Kjetill S Jakobsen	8	1
288135	Allan Linneberg	8	1
200811	Mattias Jakobsson	8	1
255839	Terri H Beaty	8	1
203070	Sallie R Permar	8	2
250604	Caroline F Wright	8	1
224357	Ilya Nemenman	8	1
256615	Charles Langelier	8	1
224396	Richard Benton	8	1
287190	Francesco Paolo Casale	8	3
206110	Leonard J Foster	8	1
252272	Bin Hu	8	3
201577	Krzysztof Bartoszek	8	1
256374	Jan O Korbel	8	2
206124	Stefan Siebert	8	3
255928	Zhaleh Safikhani	8	1
224497	Malcolm L McCallum	8	1
251413	Zoltán Kutalik	8	2
212235	Guillermo Rodrigo	8	5
263278	Jennifer Gardy	8	1
200247	Igor Rudan	8	1
250614	Andrew T Hattersley	8	1
206171	Tanja Slotte	8	1
255435	Jonas Warringer	8	1
224757	Bartlomiej Waclaw	8	2
257049	Miten Jain	8	1
212361	Andrew Dhawan	8	2
250122	Gabriel C Lander	8	1
203133	Sylvain Gandon	8	1
310043	Roger Calderon	8	1
212408	Elisabeth B. Binder	8	1
249802	Gregory P Way	8	2
206223	John R. Stinchcombe	8	1
249168	Evgenii L Kovrigin	8	1
206235	Alexandre Antonelli	8	1
254486	Yong Hou	8	1
212443	Ahmadreza Ghaffarizadeh	8	3
246046	Harriet de Wit	8	1
224962	Anders Dale	8	2
249940	Gianluigi Zanetti	8	1
212464	Peter Würtz	8	3
266196	Stefan Herms	8	2
212469	Pasi Soininen	8	2
253299	Jack Kuipers	8	1
225003	Eran Tauber	8	1
201611	Felipe Zapata	8	3
206281	Omar S Akbari	8	3
200836	John H. Willis	8	1
201637	Alvaro Sanchez	8	2
212752	Tong Zhang	8	3
200850	Richard M Merrill	8	3
203251	Szabolcs Szamado	8	1
206477	Michael T Monaghan	8	1
206478	Oana Carja	8	1
212922	Patrick Wincker	8	1
212937	Ryan N Gutenkunst	8	1
212971	Anders Albrechtsen	8	1
226034	Perminder S. Sachdev	8	1
201674	Jeffrey E. Lane	8	2
206563	Amit Kumar	8	5
203314	Mathieu Gautier	8	2
226300	Christophe Leterrier	8	1
226321	Jonathan D. Cohen	8	1
226331	James Peters	8	2
226393	Aude Oliva	8	1
226506	Ian T. Fiddes	8	2
213296	Simon C. Watkins	8	2
200893	Craig R Primmer	8	2
213421	Lars M Steinmetz	8	2
227064	Daniel Segre	8	1
213511	Jeffrey Varner	8	2
200475	Eric A. Miska	8	1
200268	Veronique Vitart	8	1
203422	Rosie M Walker	8	2
227146	Jesse S Boehm	8	1
227158	Marcin Imielinski	8	3
213593	Xia Yang	8	3
203441	Robert Kofler	8	1
203469	Michael Hofreiter	8	1
227482	Trent R. Northen	8	1
200474	Phillip D. Zamore	8	1
200477	Francis M. Jiggins	8	1
213803	Laurent Duret	8	1
213810	Adam Eyre-Walker	8	1
203513	Hernán A. Burbano	8	1
227800	Bradly Alicea	8	1
227809	Gholson J Lyon	8	2
227810	Jesse Gillis	8	1
206979	David A Hume	8	2
227990	John Greally	8	1
228037	Siavash Mirarab	8	2
200271	Qin Wang	8	2
200927	Rob Phillips	8	1
228156	Martin Kapun	8	3
214088	Jie Yan	8	4
214139	Kathryn Holt	8	1
228394	Joseph Pickrell	8	2
200935	Alan O. Bergland	8	2
200937	Josefa Gonzalez	8	2
200938	Paul Schmidt	8	1
200943	Jorge Peña	8	2
228633	Leonard H van den Berg	8	1
203621	Ruedi Fries	8	1
203622	Hubert Pausch	8	2
228858	Pier Francesco Palamara	8	2
228863	Shane McCarthy	8	2
228896	Ying Zhou	8	3
200105	Felix Day	8	1
228965	Anders Eriksson	8	3
214505	Christian Dansereau	8	2
203680	James Walters	8	3
229270	Aldo Cordova-Palomera	8	3
203708	Nikolai Slavov	8	1
229582	David H Hall	8	2
203726	Paul Kellam	8	2
203785	Julie Ahringer	8	1
230042	Anders Eklund	8	1
230288	Jaroslav Rokicki	8	1
207561	Georgios Koutsovoulos	8	3
215187	Andrea Hawkins-Daarud	8	3
230508	Russell A. Poldrack	8	2
215186	David Robert Grimes	8	3
230511	Tonya White	8	1
201951	Timothy D. Spector	8	1
207678	A. Gregory Matera	8	2
215333	Ulrich Brose	8	1
215507	Daniel Stouffer	8	1
201029	Kristian G Andersen	8	4
231452	S. Cenk Sahinalp	8	3
203948	Michael Wigler	8	1
203949	Ryne C. Ramaker	8	2
231509	Holger Prokisch	8	1
200064	Aswin Sai Narain Seshasayee	8	1
215789	Guy E. Thwaites	8	1
204011	Nir Friedman	8	2
232147	Yonatan Grad	8	1
208040	Samuel Marguerat	8	2
202050	Li Shen	8	4
216077	Armin Raznahan	8	1
216095	Kenneth D Harris	8	2
216112	Richard D. Fetter	8	2
216122	Mark Jenkinson	8	1
216128	Saad Jbabdi	8	2
216177	Stefano Panzeri	8	1
216192	Howard Bowman	8	2
216217	Robert W Cox	8	2
216332	Andrew McIntosh	8	1
232837	Richard E Straub	8	1
201071	Martin Ackermann	8	1
216412	Blake C. Meyers	8	2
208240	A. David Edwards	8	1
233035	Gareth Ball	8	3
216501	Dolf Weijers	8	1
208264	Jochen Triesch	8	1
233202	Jing Zhao	8	3
201077	Elisabetta Versace	8	3
216576	Ioannis Xenarios	8	3
250528	Alexander E. Urban	7	1
233467	Mina Ryten	7	1
261473	Corinne Cruaud	7	1
233487	Sebastiano Stramaglia	7	1
247766	Jonathan B. Grimm	7	1
201097	Igor V Grigoriev	7	1
253491	Stephen V. Faraone	7	2
233628	Udo Dannlowski	7	1
263868	Joseph N Paulson	7	1
204215	Kosuke Yusa	7	1
279343	Joseph Buxbaum	7	1
208377	Amir Dezfouli	7	1
260099	Joseph E Powell	7	2
204226	Kevin Wei	7	2
261805	Mirko Rossi	7	2
208402	Hongxia Wang	7	3
251414	Patrick Deelen	7	1
216800	Stefano Lonardi	7	1
274461	Patricia Murray	7	2
208408	Fabrizio Gabbiani	7	2
268973	James Gurtowski	7	1
233796	Henrik Walter	7	1
286283	Christina Hultman	7	1
234014	Michal Kandrik	7	1
251946	L Aravind	7	2
208477	Stavros I Dimitriadis	7	1
253401	Mile Sikic	7	1
216925	Michael Springer	7	1
253418	Sohrab P Shah	7	2
216938	Ellis Patrick	7	2
274964	Shelly Peyton	7	1
202159	Dennis Vitkup	7	2
268000	Karthik Anantharaman	7	2
216935	Jishu Xu	7	2
266439	Brendan Lee	7	1
200320	David Hinds	7	1
323339	Susan R Heckbert	7	2
202165	Peter S Swain	7	1
295596	Madhav Mani	7	2
200581	Ben Longdon	7	2
266804	Chris Drakeley	7	1
201113	Sylvain Brisse	7	2
323553	Tarjinder Singh	7	2
208530	Eduardo A. Garza-Villarreal	7	2
308185	Christine Stevens	7	1
202177	Leonie C Moyle	7	1
263890	Naomi Wray	7	1
208549	Stephen A. Baccus	7	1
259973	Paolo Piazza	7	1
201125	Martin Lascoux	7	1
285453	Celeste M. Karch	7	1
202194	Luke J. Harmon	7	1
259265	Vijay Kumar	7	4
217210	Patrick C. Phillips	7	1
264196	Sheng Zhong	7	2
217211	Gaspar Jekely	7	2
306976	Steve Horvath	7	1
234649	Nicholas R Thomson	7	1
265879	ICGC/TCGA Pan-Cancer Analysis of Whole Genomes Net	7	0
208737	Adam Roddy	7	1
251532	Aziz Khan	7	3
235250	Annie Vogel Ciernia	7	2
266453	Mark Lipson	7	2
235340	Tom Schonberg	7	1
273626	Carrow I Wells	7	1
217580	Elizabeth Tseng	7	1
290400	Jordan Smoller	7	2
217658	Michael Hanke	7	1
251980	Yun Chen	7	2
217667	Antonino Cattaneo	7	1
247993	Xavier Michalet	7	1
235558	Deanna M Barch	7	1
262606	Polly Fordyce	7	1
217672	Caio Maximino	7	1
288225	David Hougaard	7	1
217681	Sue Ann Koay	7	2
297783	Zhi-De Deng	7	1
217724	Marcello Massimini	7	1
315268	Michael Stumvoll	7	1
235685	Olav B. Smeland	7	3
280831	Clinton S Potter	7	1
235711	Bernd Weber	7	1
278157	Alexa Burger	7	2
235744	Vincent T. van Hees	7	1
268978	Vivek Kumar	7	3
217824	Ankit N Khambhati	7	2
279354	David J. Harris	7	2
217825	Marcelo G Mattar	7	1
267207	David A Wheeler	7	1
202272	Amitabh Joshi	7	1
275561	Gabriel Popescu	7	1
235999	W. Richard McCombie	7	1
253161	Bud Mishra	7	1
217900	Rastko Ciric	7	2
248903	Tao Wang	7	5
202285	Ulrich K Steiner	7	1
254230	Sylvain Sebert	7	1
236183	Giorgio Vallortigara	7	1
247199	Justin Chu	7	2
236202	Yue Tao	7	1
266958	Joachim Weischenfeldt	7	1
236207	Shuo Li	7	2
290193	Esben Agerbo	7	1
236220	Jindrich Cinatl	7	1
266945	Jack A. Kosmicki	7	1
204542	Priya Moorjani	7	2
263170	Matthew B Sullivan	7	2
236349	Edith Hofer	7	1
276431	Yue Zhang	7	4
236459	Towfique Raj	7	1
247193	Haohan Wang	7	1
236478	Cornelia van Duijn	7	1
256304	Luca De Sano	7	0
200617	Joanna Masel	7	2
281757	Maxime Dahirel	7	2
218139	Iddo Friedberg	7	2
266275	Carmen J. Marsit	7	2
218177	Frank C. Schroeder	7	2
265262	Bing Li	7	4
236542	Julie A Schneider	7	1
246267	Samia R L Joca	7	1
204590	Tanya Golubchik	7	3
252980	Anton Nekrutenko	7	1
209172	David R. Nelson	7	3
266219	Aaron TL Lun	7	2
209177	Sarah Cobey	7	1
289749	Penelope A Lind	7	0
201198	Hunter Fraser	7	1
248362	Abhijit Chakraborty	7	1
204614	Liang Ma	7	4
277074	Manu Prakash	7	1
209198	Fei He	7	4
253140	Ken Chen	7	1
209217	Michael G. B. Blum	7	2
279652	Wallace F. Marshall	7	2
209238	Xiaofan Zhou	7	3
289741	Paul M Ridker	7	1
218437	Thomas D. Otto	7	2
281978	Nicolas Loeuille	7	3
209253	Simon H. Martin	7	1
250891	Yong Chen	7	4
237214	Jeremy Hall	7	1
299412	Benjamin G Neel	7	1
237325	Yue Wu	7	3
260483	Kelli L Palmer	7	1
218582	Stephen Richards	7	1
277989	Stella Trompet	7	1
209363	Ping Liu	7	3
253290	James Boocock	7	2
237619	Sirawaj Itthipuripat	7	1
263124	Jinbo Xu	7	3
204732	Mariel S. Mohns	7	1
251012	Philipp D Koellinger	7	2
209482	Ya Yang	7	2
253001	Joshua M Stuart	7	1
200349	Justin O Borevitz	7	1
246044	James MacKillop	7	1
238356	Chengfeng Xiao	7	1
251166	Joel N Hirschhorn	7	2
238397	Guillermo Cecchi	7	3
257602	Seiya Imoto	7	1
200202	Peter Joshi	7	1
267048	Jonas B. Nielsen	7	1
219103	Anne K. Churchland	7	1
263148	Rene L Warren	7	1
219135	Xueyi Shen	7	1
249766	Eric D. Chow	7	1
219143	David CM Liewald	7	1
262637	Ozlem Tastan Bishop	7	1
238598	Daniel Davis	7	2
288891	Gaetan Burgio	7	1
202442	Gennadi Glinsky	7	1
262092	Pieter Meysman	7	1
219269	Maximilian O Press	7	2
263486	Pavel Flegontov	7	2
204850	Yan-Ping Chen	7	1
283727	David L Smith	7	2
219341	Jing-Ke Weng	7	1
258755	Hideya Kawaji	7	2
219356	Ana Conesa	7	2
263374	Páll Melsted	7	1
219381	Daniel B. Sloan	7	2
247925	Joshua Ladau	7	1
209713	Feng Chen	7	4
253145	Bohdan B Khomtchouk	7	2
209744	Jianqiang Wu	7	3
267789	John Platig	7	1
219461	Lei Li	7	6
286281	Dalila Pinto	7	1
219508	Bernd Bodenmiller	7	2
253257	Michel Dumontier	7	2
239275	Chao Yang	7	3
[truncated: 168,288 more rows]
