# Supplementary material for: Tracking the popularity and outcomes of all bioRxiv preprints
Source: eLife journal article supplement (doi:10.7554/elife.45133), 2019-04-24
Supplement: supp [file elife-45133-supp-v1.zip › elife_poa_e45133_Figure_1_source_data_8.csv]

institution	authors	papers
Stanford University	1473	1045
University of Oxford	1192	902
University of Cambridge	1109	842
University of Washington	924	609
University College London	801	644
University of Pennsylvania	764	544
University of Michigan	763	484
University of California San Francisco	750	511
University of California San Diego	725	495
Imperial College London	703	472
University of Edinburgh	646	487
University of California Berkeley	620	528
Yale University	555	392
Duke University	554	323
Harvard University	532	557
Harvard Medical School	529	453
Columbia University	520	422
Cornell University	486	365
University of Toronto	462	334
Johns Hopkins University	461	407
University of California Davis	461	291
Icahn School of Medicine at Mount Sinai	448	281
University of Chicago	444	353
University of British Columbia	431	281
University of Minnesota	430	310
King's College London	417	263
University of Wisconsin-Madison	415	215
Massachusetts Institute of Technology	414	332
UCSF	404	259
Baylor College of Medicine	403	211
Northwestern University	395	238
University of Florida	374	256
University of Bristol	370	289
University of California Los Angeles	364	338
University of Pittsburgh	353	221
UCLA	352	254
INRA	348	169
University of Utah	336	156
University of Glasgow	335	225
University of Copenhagen	325	251
Princeton University	323	312
Wellcome Trust Sanger Institute	315	282
McGill University	315	226
University of Southern California	308	256
Karolinska Institutet	303	212
Michigan State University	301	202
The Scripps Research Institute	300	167
University of North Carolina at Chapel Hill	284	153
NA	284	95
Johns Hopkins University School of Medicine	282	153
Emory University	272	173
University of Massachusetts Medical School	272	148
Weizmann Institute of Science	268	126
Massachusetts General Hospital	265	280
Memorial Sloan Kettering Cancer Center	262	148
CNRS	259	219
Boston University	252	194
University of Manchester	250	141
Broad Institute of MIT and Harvard	248	259
National Institutes of Health	248	184
Institut Pasteur	247	146
University of Helsinki	246	166
University of Sheffield	244	166
California Institute of Technology	243	217
University of Birmingham	237	162
New York University	235	249
ETH Zurich	230	240
Cold Spring Harbor Laboratory	230	196
Allen Institute for Brain Science	230	73
UC Berkeley	229	205
University of Georgia	227	146
Vanderbilt University	224	172
University of California Irvine	223	148
Georgia Institute of Technology	216	139
Washington University School of Medicine	214	153
Monash University	213	137
University of Zurich	210	182
University of Virginia	208	153
Mayo Clinic	208	115
Indiana University	207	199
University of Texas at Austin	206	166
Uppsala University	205	162
University of Oslo	203	158
Newcastle University	200	115
University of Calgary	196	100
University of Lausanne	190	175
University of Illinois at Urbana-Champaign	190	136
Washington University in St. Louis	188	125
University of Melbourne	186	157
University of Nottingham	186	123
University of Dundee	186	118
Rutgers University	181	106
Ghent University	179	116
University of Liverpool	178	110
Broad Institute	176	179
Pennsylvania State University	173	147
University of Arizona	173	120
Stanford University School of Medicine	170	108
The Rockefeller University	170	107
Tel Aviv University	168	105
Fred Hutchinson Cancer Research Center	166	119
Purdue University	165	106
University of Iowa	165	100
University of Queensland	162	139
Aarhus University	161	146
Rice University	161	118
The University of Queensland	155	125
University of Warwick	155	112
Tsinghua University	153	108
Arizona State University	153	107
Brown University	151	101
UT Southwestern Medical Center	151	85
University of Alberta	150	87
The University of Tokyo	149	98
UCL	147	106
Colorado State University	147	91
Oregon Health & Science University	147	78
University of Exeter	146	134
MIT	145	183
Albert Einstein College of Medicine	145	80
University of California Riverside	143	105
Cardiff University	143	83
BGI-Shenzhen	143	61
National University of Singapore	141	121
University of Geneva	141	92
North Carolina State University	141	91
Virginia Commonwealth University	141	66
Utrecht University	140	67
Iowa State University	139	82
The University of Texas MD Anderson Cancer Center	136	41
Carnegie Mellon University	135	134
University of California Santa Cruz	135	95
Texas A&M University	135	94
Lawrence Berkeley National Laboratory	134	97
The Ohio State University	134	79
The Francis Crick Institute	133	82
University of Maryland	131	123
Stockholm University	131	94
UCSD	130	88
University of Leeds	130	70
University of Alabama at Birmingham	130	47
Case Western Reserve University	128	63
The Jackson Laboratory	127	65
Peking University	126	81
John Innes Centre	126	72
University of Leicester	126	65
Leiden University	125	84
University of Amsterdam	124	100
University of Rochester	124	91
Stony Brook University	123	99
The University of Melbourne	120	96
University of Notre Dame	120	79
KU Leuven	118	90
Columbia University Medical Center	118	76
The Pennsylvania State University	117	119
Dana-Farber Cancer Institute	117	99
Simon Fraser University	116	82
University of Otago	115	86
McMaster University	114	76
Wageningen University	113	75
Weill Cornell Medicine	112	88
Boston Children's Hospital	112	70
University of Illinois at Chicago	112	64
Australian National University	111	94
University of Groningen	111	77
National Cancer Institute	111	74
University of York	111	72
University of North Carolina	110	95
University of Texas Southwestern Medical Center	110	55
The University of Texas at Austin	109	84
Ontario Institute for Cancer Research	109	72
Weill Cornell Medical College	109	69
University of Auckland	107	80
Fudan University	107	78
University of Gothenburg	107	74
University of Western Ontario	107	60
Boston University School of Medicine	107	44
University of Colorado Boulder	106	88
Kyoto University	106	85
Lund University	106	76
Brandeis University	104	59
University of Sao Paulo	104	58
University of Wisconsin Madison	103	81
Nanjing Agricultural University	103	35
University of Basel	100	79
University of Texas MD Anderson Cancer Center	100	59
University of Oregon	99	89
University of California Santa Barbara	99	65
New York University School of Medicine	99	63
Technical University of Denmark	99	62
University of Bern	98	84
University of Kentucky	98	68
Florida State University	98	64
The University of Chicago	97	79
Northeastern University	97	74
University of Vermont	97	69
Oregon State University	97	67
Brigham and Women's Hospital	96	146
European Molecular Biology Laboratory	96	103
Heidelberg University	96	79
University Medical Center Utrecht	96	65
Sun Yat-sen University	96	62
University of Connecticut	95	90
University of Turku	95	58
Wellcome Sanger Institute	94	142
The Chinese University of Hong Kong	94	42
St. Jude Children's Research Hospital	94	18
UC Davis	93	74
Leiden University Medical Center	93	51
Stowers Institute for Medical Research	93	37
Cincinnati Children's Hospital Medical Center	93	31
University of Sydney	91	80
University of Sussex	91	77
University of Colorado	90	79
University of Southampton	89	59
Indian Institute of Science	89	56
Nanyang Technological University	89	41
University of Colorado School of Medicine	88	47
Pacific Northwest National Laboratory	88	35
Vrije Universiteit Amsterdam	87	92
Institut Curie	87	57
University of Tokyo	87	55
Dalhousie University	87	45
Public Health England	87	41
Seoul National University	86	38
University of Miami	85	54
Genome Institute of Singapore	85	50
Queen Mary University of London	83	63
University of Bonn	83	53
University of New South Wales	82	82
University of Vienna	82	53
University of Michigan Medical School	82	46
University of Wisconsin - Madison	81	77
MRC Laboratory of Molecular Biology	81	63
University of East Anglia	81	53
University of Delaware	80	62
Queensland University of Technology	79	59
China Agricultural University	79	49
Technical University of Munich	79	42
Virginia Tech	78	66
University of Adelaide	78	60
Donald Danforth Plant Science Center	77	61
Erasmus MC	76	62
Universidade de Sao Paulo	76	41
University of Cape Town	76	41
Northwestern University Feinberg School of Medicine	76	28
University of Ottawa	75	53
University of Cologne	75	50
Zhejiang University	74	70
Yale School of Medicine	74	68
Kansas State University	74	44
University of Missouri	74	44
Delft University of Technology	74	41
Temple University	73	64
Vanderbilt University Medical Center	73	64
University of Tuebingen	73	57
University of Massachusetts Amherst	73	42
Indiana University School of Medicine	73	41
Washington University	72	63
Shanghai Jiao Tong University	72	59
INSERM	72	45
Osaka University	72	43
Medical University of South Carolina	72	32
UC San Diego	71	91
Radboud University	71	69
Dartmouth College	71	63
Ecole Polytechnique Federale de Lausanne	71	59
Oxford University	71	49
Yale University School of Medicine	71	47
The University of Manchester	71	45
Wayne State University	71	45
University of Nebraska Medical Center	71	30
Max Planck Institute of Molecular Cell Biology and Genetics	70	63
University of New Mexico	70	60
University of Guelph	70	59
MD Anderson Cancer Center	70	49
Wageningen University & Research	70	38
University of Southern Denmark	69	54
University Medical Center Groningen	69	53
The Walter and Eliza Hall Institute of Medical Research	69	48
Western University	69	48
University of Cincinnati	69	36
Universitat Pompeu Fabra	68	107
Huazhong University of Science and Technology	68	36
The University of Edinburgh	67	91
University of Kansas	67	73
Rockefeller University	67	54
Max Planck Institute of Molecular Physiology	67	20
The Hebrew University of Jerusalem	66	63
London School of Hygiene and Tropical Medicine	66	57
Penn State University	66	52
The Jackson Laboratory for Genomic Medicine	66	50
Cedars-Sinai Medical Center	66	44
Centers for Disease Control and Prevention	66	44
Child Mind Institute	66	41
Kings College London	66	41
Academia Sinica	65	34
Johns Hopkins School of Medicine	64	71
University of Aberdeen	63	54
University of Rochester Medical Center	63	50
Queen's University	63	45
Worcester Polytechnic Institute	63	31
EPFL	62	61
University of Freiburg	62	55
Universite de Montreal	62	43
Nagoya University	62	36
University College Dublin	62	35
Northwest A&F University	62	30
New York Genome Center	61	84
University Medical Center Hamburg-Eppendorf	61	61
NIH	61	48
Earlham Institute	61	47
Geisel School of Medicine at Dartmouth	61	39
The University of Hong Kong	60	62
University of South Florida	60	50
Oregon Health and Science University	60	48
Trinity College Dublin	60	47
University of Idaho	60	43
University of Bergen	60	40
University of California Merced	60	39
EMBL-EBI	59	60
Georgetown University	59	40
University of Louisville	59	28
University of Bath	58	53
University of Tennessee	58	47
Swedish University of Agricultural Sciences	58	45
Washington State University	58	45
Northern Arizona University	58	30
Broad Institute of Harvard and MIT	57	75
University of Tartu	57	51
Norwegian University of Life Sciences	57	38
Aalto University	57	36
University of Antwerp	57	33
Ben-Gurion University of the Negev	57	32
Boston College	57	31
Oak Ridge National Laboratory	57	31
Max Planck Institute for Human Cognitive and Brain Sciences	57	27
The University of Sydney	56	60
CSIRO	56	40
The Hospital for Sick Children	56	36
University of Montreal	55	46
Institute for Systems Biology	55	45
University of Pittsburgh School of Medicine	55	42
University of Kent	55	34
Queen's University Belfast	55	27
Caltech	54	100
Janelia Research Campus Howard Hughes Medical Institute	54	58
Chinese Academy of Sciences	54	54
University of Maryland College Park	54	50
Technion - Israel Institute of Technology	54	33
University of Liege	54	33
Human Longevity Inc.	54	27
Duke University School of Medicine	54	26
Duke University Medical Center	53	50
University of Reading	53	43
The Sainsbury Laboratory	53	42
George Washington University	53	35
Tufts University	53	32
James Cook University	53	30
University of Utah School of Medicine	53	26
University of Luxembourg	53	18
University of North Carolina Chapel Hill	52	62
German Cancer Research Center (DKFZ)	52	53
Huazhong Agricultural University	52	35
University of Maryland School of Medicine	52	33
HudsonAlpha Institute for Biotechnology	52	32
Wake Forest School of Medicine	51	33
National Taiwan University	51	27
Geisinger Health System	51	18
QIMR Berghofer Medical Research Institute	50	70
Johns Hopkins Bloomberg School of Public Health	50	64
University of Houston	50	45
AstraZeneca	50	36
Netherlands Cancer Institute	50	32
University of Muenster	50	32
Thomas Jefferson University	50	31
Institute of Genetics and Developmental Biology Chinese Academy of Sciences	50	30
Universidade Federal do Rio de Janeiro	50	26
West Virginia University	50	25
Harvard T.H. Chan School of Public Health	49	88
Nankai University	49	48
University of Trento	49	48
Whitehead Institute for Biomedical Research	49	44
University of Fribourg	49	36
University of St Andrews	49	32
Goethe University Frankfurt	49	30
Universitat Autonoma de Barcelona	49	21
University of New Hampshire	48	40
Clemson University	48	32
Hokkaido University	48	30
Montana State University	48	28
Radboud University Medical Center	48	28
The University of Western Australia	48	25
University of Oulu	47	57
Ohio State University	47	44
Statens Serum Institut	47	35
Hospital for Sick Children	47	34
University of Colorado Denver	47	31
University of Wuerzburg	47	31
University at Buffalo	47	28
University of Colorado Anschutz Medical Campus	47	27
Fujian Agriculture and Forestry University	47	25
IGBMC	47	20
Genentech	47	19
Universidade Federal de Minas Gerais	47	17
Illinois State University	47	12
Sun Yat-Sen University	46	38
Illumina Inc.	46	33
South Dakota State University	46	27
KAIST	46	24
Brigham Young University	46	18
CeMM Research Center for Molecular Medicine of the Austrian Academy of Sciences	46	18
Victor Chang Cardiac Research Institute	46	18
Cancer Research UK Cambridge Institute University of Cambridge	46	15
University of Wisconsin	45	46
Garvan Institute of Medical Research	45	36
Maastricht University	45	31
Florida International University	45	28
BGI-Shenzhen Shenzhen 518083 China	45	25
Chinese University of Hong Kong	45	23
Wageningen University and Research	45	22
University of Regensburg	45	21
University of California	44	92
King Abdullah University of Science and Technology	44	56
Max Planck Institute for Developmental Biology	44	53
Cleveland Clinic	44	52
University of Illinois Urbana-Champaign	44	39
Drexel University	44	31
The University of North Carolina at Chapel Hill	44	27
European Molecular Biology Laboratory (EMBL)	43	53
London School of Hygiene & Tropical Medicine	43	48
Ecole Normale Superieure	43	44
SUNY Upstate Medical University	43	38
University of Western Australia	43	36
Karolinska Institute	43	35
BC Cancer Agency	43	23
University of Science and Technology of China	43	20
Wuhan University	43	20
Shandong Agricultural University	43	14
Salk Institute for Biological Studies	42	42
University of Waterloo	42	38
University of Nebraska-Lincoln	42	32
RIKEN	42	31
The University of Adelaide	42	30
San Diego State University	42	29
Oxford Brookes University	42	26
Durham University	42	23
Argonne National Laboratory	42	20
Hong Kong University of Science and Technology	42	19
Korea Research Institute of Bioscience and Biotechnology	42	12
Beijing Normal University	41	46
Hebrew University of Jerusalem	41	46
Washington University in Saint Louis	41	37
Emory University School of Medicine	41	32
Imperial College	41	30
Universidad Nacional Autonoma de Mexico	41	30
University of Michigan Ann Arbor	41	23
Marquette University	41	22
Translational Genomics Research Institute	41	20
University of South Carolina	41	19
Washington University School of Medicine in St. Louis	41	16
Penn State College of Medicine	41	12
Moffitt Cancer Center	40	66
Stanford	40	33
York University	40	33
Jawaharlal Nehru Centre for Advanced Scientific Research	40	27
Pfizer	40	22
The George Washington University	40	16
University of Campinas	40	15
Macquarie University	39	40
Los Alamos National Laboratory	39	37
Lieber Institute for Brain Development	39	36
The Institute of Cancer Research	39	30
University of Oklahoma	39	29
University of Florence	39	28
Illumina	39	26
Walter and Eliza Hall Institute of Medical Research	39	26
Norwegian University of Science and Technology	39	25
Max Planck Institute of Biochemistry	39	23
Princess Margaret Cancer Centre	39	23
University of Tennessee Health Science Center	39	19
University of Minnesota Twin Cities	39	18
Masaryk University	39	16
Max Planck Institute of Psychiatry	39	16
Fox Chase Cancer Center	39	10
UNC	39	10
National Centre for Biological Sciences	38	44
Oslo University Hospital	38	37
Central South University	38	29
National Human Genome Research Institute	38	28
Rutgers The State University of New Jersey	38	28
Medical College of Wisconsin	38	24
Lehigh University	38	23
University of Padova	38	21
Department of Biochemistry University of Oxford	38	20
Oxford University Clinical Research Unit	38	20
Ben Gurion University	38	16
Louisiana State University	37	41
Universite Laval	37	29
University of Saskatchewan	37	27
Champalimaud Centre for the Unknown	37	19
Washington University in St Louis	37	17
University of Pisa	37	15
CSIR-Centre for Cellular and Molecular Biology	37	11
Fiocruz	37	7
Sichuan University	36	52
University of Texas Health Science Center at Houston	36	50
TU Dresden	36	27
Carnegie Institution for Science	36	26
NIAB EMR	36	26
Bielefeld University	36	22
J. Craig Venter Institute	36	22
Saint Louis University	36	22
East Carolina University	36	21
Vanderbilt University School of Medicine	36	21
Karlsruhe Institute of Technology	36	16
Regeneron Genetics Center	36	13
Yangzhou University	36	13
VU University Amsterdam	35	53
Harvard	35	50
UC Irvine	35	40
Kunming Institute of Zoology Chinese Academy of Sciences	35	36
Universite de Sherbrooke	35	35
The Australian National University	35	31
USDA-ARS	35	28
Umea University	35	27
European Molecular Biology Laboratory European Bioinformatics Institute	35	26
Van Andel Research Institute	35	21
Concordia University	35	20
NYU School of Medicine	35	20
Max Planck Institute of Immunobiology and Epigenetics	35	13
San Raffaele Scientific Institute	35	12
National Cancer Centre Singapore	35	11
National Institute of Infectious Diseases	35	11
Virginia Polytechnic Institute and State University	34	35
Massey University	34	30
University of Technology Sydney	34	29
CIRAD	34	24
University of Manitoba	34	23
MIT Lincoln Laboratory	34	22
University of Kansas Medical Center	34	19
University of Pretoria	34	19
Centre for Cellular and Molecular Biology	34	18
Anhui Agricultural University	34	17
Oakland University	34	17
National Institute of Environmental Health Sciences	34	16
Universidade Federal do Rio Grande do Sul	34	13
NYU	33	54
EMBL	33	37
University of Montana	33	31
Liverpool School of Tropical Medicine	33	28
The Broad Institute of MIT and Harvard	33	24
Helmholtz Centre for Infection Research	33	22
Beijing Institute of Genomics Chinese Academy of Sciences	33	21
Memorial Sloan-Kettering Cancer Center	33	21
Swansea University	33	18
The University of Auckland	33	18
University of Tsukuba	33	17
Federal Research and Clinical Centre of Physical-Chemical Medicine	33	6
University of California at Berkeley	32	46
National Institute of Mental Health	32	45
Centre for Genomic Regulation (CRG)	32	38
Pacific Biosciences	32	38
Janelia Research Campus	32	28
The Netherlands Cancer Institute	32	23
MSKCC	32	22
Umeå University	32	22
Indian Institute of Technology Bombay	32	21
University of Tubingen	32	21
Biozentrum University of Basel	32	20
GlaxoSmithKline	32	19
Universidade Estadual de Campinas	32	19
Oklahoma State University	32	18
University of Pavia	32	16
Children's Hospital of Philadelphia	32	15
Carleton University	32	14
Henan Agricultural University	32	14
Pontificia Universidad Catolica de Chile	32	11
UNC-Chapel Hill	32	11
Novartis Institutes for Biomedical Research	32	5
Taipei American School	32	3
University of Heidelberg	31	43
Duke-NUS Medical School	31	36
Université de Montréal	31	31
University of Arkansas	31	29
Georgia State University	31	28
Istituto Italiano di Tecnologia	31	26
Max Planck Institute for Plant Breeding Research	31	25
University of Newcastle	31	24
Universite catholique de Louvain	31	22
University of New England	31	22
Beth Israel Deaconess Medical Center	31	20
Max Planck Institute for Heart and Lung Research	31	14
Federal University of Rio de Janeiro	31	12
Nathan S. Kline Institute for Psychiatric Research	31	11
University of Oklahoma Health Sciences Center	31	6
Max Planck Institute for Evolutionary Biology	30	51
Harvard School of Public Health	30	48
Harvard T. H. Chan School of Public Health	30	37
University of Illinois	30	35
University of Essex	30	29
University of Hohenheim	30	29
University of Tennessee Knoxville	30	28
Bangor University	30	25
University of Barcelona	30	23
University of California at San Francisco	30	22
University of Nevada Reno	30	22
National Institute of Allergy and Infectious Diseases	30	21
Kyushu University	30	19
University of Oxford UK	30	19
Freenome	30	18
Murdoch University	30	16
University of Surrey	30	16
Max Planck Institute for Chemical Ecology	30	15
Institute of Cancer Research	30	13
Seattle Children's Research Institute	30	13
Universidad Autonoma de Madrid	30	13
University of Torino	30	10
Seoul National University Seoul 08826 Korea	30	5
Dana Farber Cancer Institute	29	65
Howard Hughes Medical Institute	29	39
Montreal Neurological Institute McGill University	29	34
CRG	29	27
Tata Institute of Fundamental Research	29	26
Instituto Gulbenkian de Ciencia	29	25
Department of Genetics Harvard Medical School	29	24
Hubrecht Institute	29	24
Max Planck Institute for Molecular Genetics	29	24
Perelman School of Medicine University of Pennsylvania	29	24
Tulane University	29	24
Sichuan Agricultural University	29	23
University of Pennsylvania Perelman School of Medicine	29	22
University of Strathclyde	29	21
Aberystwyth University	29	20
Florida Atlantic University	29	20
University of Hong Kong	29	20
University of Haifa	29	19
Memorial University of Newfoundland	29	18
Inserm	29	17
University of Miami Miller School of Medicine	29	17
LMU Munich	29	16
10X Genomics	29	15
UT MD Anderson Cancer Center	29	15
Mississippi State University	29	14
Tufts University School of Medicine	29	13
Sharif University of Technology	29	12
Ulm University	29	12
Liverpool School of Tropical Medicine UK	29	7
Harvard TH Chan School of Public Health	28	65
Gladstone Institutes	28	42
Donders Institute for Brain Cognition and Behaviour	28	40
Murdoch Childrens Research Institute	28	37
UMC Utrecht	28	29
HHMI Janelia Research Campus	28	27
Murdoch Children's Research Institute	28	27
IRD	28	26
Korea Advanced Institute of Science and Technology	28	21
DKFZ	28	20
Tohoku University	28	20
Stellenbosch University	28	17
Aalborg University	28	16
Shandong University	28	16
Miami University	28	14
Seoul National University College of Medicine	28	14
Vancouver Prostate Centre	28	9
University of Eastern Finland	27	51
Babraham Institute	27	34
UC Santa Cruz	27	33
Mount Sinai School of Medicine	27	26
H. Lee Moffitt Cancer Center	27	24
San Francisco State University	27	23
CEA	27	19
Flinders University	27	18
BGI-Shenzhen Shenzhen China	27	16
Cornell University United States	27	10
South China Agricultural University	27	10
J Craig Venter Institute	27	9
INRA France	27	6
University of Leipzig	26	29
Chalmers University of Technology	26	28
German Cancer Research Center	26	23
Max Delbrueck Center for Molecular Medicine	26	22
Universidad de Chile	26	22
University of Texas Medical Branch	26	21
Counsyl Inc.	26	20
Lieber Institute for Brain Development Baltimore MD	26	20
Université Laval	26	20
University of Sherbrooke	26	18
Medical University of Vienna	26	16
Universidad de los Andes	26	16
University of Lethbridge	26	16
Universidad Nacional Autónoma de México	26	15
University of Goettingen	26	15
Max Planck Institute for Biophysical Chemistry	26	14
Texas Tech University	26	14
University of São Paulo	26	14
Oxford University Hospitals NHS Foundation Trust	26	12
Jilin University	26	11
Monell Chemical Senses Center	26	11
Allen Institute for Cell Science	26	9
KEMRI-Wellcome Trust Research Programme	26	8
Texas A&M University College Station	26	8
University of Wollongong	26	8
Gansu Agricultural University	26	5
uBiome Inc.	26	1
University of South Australia	25	35
Ludwig Institute for Cancer Research	25	33
University of Canterbury	25	32
Utah State University	25	30
Brigham and Women's Hospital Harvard Medical School	25	29
La Jolla Institute for Allergy and Immunology	25	29
Ecole Polytechnique Federale de Lausanne (EPFL)	25	28
IST Austria	25	28
National Institute of Genetics	25	26
Sage Bionetworks	25	21
Sorbonne Universite	25	21
The Children's Hospital of Philadelphia	25	21
Hungarian Academy of Sciences	25	18
University of Illinois at Urbana Champaign	25	18
University of Luebeck	25	18
Institute of Psychiatry Psychology and Neuroscience King's College London	25	17
Lomonosov Moscow State University	25	17
International Institute of Tropical Agriculture	25	16
Max Planck Institute of Molecular Plant Physiology	25	15
University of Helsinki Finland	25	15
Roswell Park Cancer Institute	25	13
UCL Institute of Neurology	25	13
University of Connecticut Health Center	25	13
University of Greifswald	25	13
Cambridge University Hospitals NHS Foundation Trust	25	12
Max Planck Institute for Developmental Biology Tübingen Germany	25	12
University of Macau	25	12
Lawrence Livermore National Laboratory	25	11
Novartis Institutes for BioMedical Research	25	11
Leibniz Institute of Plant Biochemistry	25	10
Medical University of Innsbruck	25	10
10x Genomics Inc.	25	8
Broad Institute of MIT and Harvard Cambridge MA 02142 USA	25	7
Shanghai Ocean University	25	5
Kenyon College	25	4
Wyss Institute for Biologically Inspired Engineering at Harvard University	25	4
VU University Medical Center	24	31
Linkoping University	24	28
Brigham and Women's Hospital and Harvard Medical School	24	27
Indian Institute of Science Education and Research Pune	24	27
University of California - Davis	24	27
Centre for Genomic Regulation	24	26
Friedrich Miescher Institute for Biomedical Research	24	25
Max Planck Institute for Evolutionary Anthropology	24	25
RWTH Aachen University	24	25
University of Bordeaux	24	24
CSHL	24	23
Radboud University Nijmegen	24	22
University Medicine Greifswald	24	20
Auburn University	24	19
Technische Universität Dresden	24	19
University of Wyoming	24	19
King Abdullah University of Science and Technology (KAUST)	24	18
Tokyo Institute of Technology	24	18
Janelia Research Campus HHMI	24	16
Seven Bridges Genomics Inc Cambridge MA 02140	24	16
NYU Langone Medical Center	24	15
Institute of Science and Technology Austria	24	12
Academic Medical Center	24	11
UC San Francisco	24	11
New England Biolabs	24	10
Oklahoma Medical Research Foundation	24	10
RIKEN Center for Biosystems Dynamics Research	24	9
University of Arkansas for Medical Sciences	24	7
BC Cancer Research Centre	24	6
Rostock University Medical Center	24	3
The University of Edinburgh Centre for Discovery Brain Sciences and UK Dementia Research Institute	24	3
UMass Medical School	23	31
University of Washington Seattle	23	25
Centre National de la Recherche Scientifique	23	22
Chinese Academy of Agricultural Sciences	23	22
Indian Institute of Technology Madras	23	22
UConn Health	23	22
Loyola University Chicago	23	21
Technion	23	19
University of Montpellier	23	19
Freie Universitaet Berlin	23	18
H. Lee Moffitt Cancer Center & Research Institute	23	18
Laval University	23	18
Bar Ilan University	23	17
Medical University of Graz	23	17
Institute for Molecular Bioscience The University of Queensland	23	16
Cornell Lab of Ornithology	23	14
MRC Human Genetics Unit	23	14
University of Nebraska - Lincoln	23	14
Bionano Genomics	23	12
GSK	23	12
University of Texas at Dallas	23	12
CNIO	23	11
Erasmus University Medical Center	23	11
Houston Methodist Research Institute	23	11
Imperial College London UK	23	10
University of Connecticut School of Medicine	23	10
University of Crete	23	10
Universidad Nacional de Colombia	23	9
Universiti Sains Malaysia	23	8
University of Veterinary Medicine Vienna	23	8
International Centre for Diarrhoeal Disease Research Bangladesh	23	4
Shaanxi Normal University	22	51
Cambridge University	22	43
Smithsonian Tropical Research Institute	22	29
The Pirbright Institute	22	29
Max Planck Institute for Ornithology	22	28
National Institute of Standards and Technology	22	25
University of Turin	22	22
University of Milan	22	21
Center for Infectious Disease Research	22	19
University of Calcutta	22	19
Sloan Kettering Institute	22	18
University of North Carolina at Charlotte	22	18
UNC Chapel Hill	22	17
University of Virginia School of Medicine	22	17
The Salk Institute for Biological Studies	22	16
Universidad Austral de Chile	22	16
University Health Network	22	16
Yale	22	16
Robert Koch Institute	22	14
Hannover Medical School	22	13
University of Wisconsin-Milwaukee	22	12
Mayo Clinic Minnesota	22	11
National Cheng Kung University	22	11
CSIR-Institute of Genomics and Integrative Biology	22	10
Oxford Nanopore Technologies	22	10
Soochow University	22	10
Chung-Ang University	22	9
The College of William and Mary	22	9
Southern Medical University	22	8
Western University of Health Sciences	22	7
Harvey Mudd College	22	6
APHP	22	5
F.Hoffmann-La Roche	22	4
Hunan University	22	4
JHU	22	1
University of Michigan School of Public Health	21	41
University of Oxford United Kingdom	21	31
National Institute on Aging	21	30
Francis Crick Institute	21	27
Rush University Medical Center	21	24
Tel-Aviv University	21	24
University of Massachusetts	21	22
La Trobe University	21	21
University of Tasmania	21	21
Massachusetts General Hospital and Harvard Medical School	21	20
Universitat de Barcelona	21	18
University of Wisconsin-Madison United States	21	18
University of Bologna	21	14
University of Hull	21	14
New York Structural Biology Center	21	13
Research Institute of Molecular Pathology (IMP)	21	13
Western Sydney University	21	13
City University of Hong Kong	21	11
Ehime University	21	11
Texas Biomedical Research Institute	21	11
Weizmann Institute of Science Israel	21	11
Collège de France	21	10
Sanford Burnham Prebys Medical Discovery Institute	21	10
University of Granada	21	10
University of Malaya	21	10
10x Genomics	21	9
Brigham and Womens Hospital	21	9
National and Kapodistrian University of Athens	21	9
Netherlands Institute for Neuroscience	21	9
Radboudumc	21	9
University of Jyvaskyla	21	9
VIB	21	9
Hospital Universitario La Paz	21	7
New Mexico State University	21	7
NIAID	21	5
Pohang University of Science and Technology	21	5
National Research Institute for Child Health and Development	21	4
DOE Joint Genome Institute	20	32
University of Tampere	20	28
Wellcome Trust Centre for Human Genetics University of Oxford	20	27
Indiana University Bloomington	20	26
CNAG-CRG	20	23
International Rice Research Institute	20	23
The University of Texas Health Science Center at Houston	20	22
Institut Pasteur Paris France	20	20
East China Normal University	20	18
Ocean University of China	20	18
Swiss Tropical and Public Health Institute	20	18
University of Nebraska	20	18
Institute of Zoology Chinese Academy of Sciences	20	17
Mechanobiology Institute National University of Singapore	20	16
EMBL Heidelberg	20	15
George Mason University	20	15
University of Hawaii	20	15
National Institute for Basic Biology	20	14
University of Duisburg-Essen	20	14
Johns Hopkins University United States	20	13
University of Victoria	20	13
Charité Universitätsmedizin Berlin	20	12
Lady Davis Institute for Medical Research	20	12
Weizmann Institute	20	12
Charles University	20	10
Fundacao Oswaldo Cruz	20	10
National Tsing Hua University	20	10
The University of Sheffield	20	10
Universidad Politecnica de Madrid	20	10
Wadsworth Center New York State Department of Health	20	10
Public Health Agency of Canada	20	9
IRCM	20	8
University Medical Center Goettingen	20	8
Charité - Universitätsmedizin Berlin	20	7
Southwest University	20	7
Sun Yat-sen University Cancer Center	20	7
University of Electronic Science and Technology of China	20	7
Institute of Microbiology Chinese Academy of Sciences	20	6
Max Planck Institute for Heart and Lung Research Bad Nauheim Germany	20	6
Chungbuk National University	20	4
Shanghai Normal University	20	4
University at Albany SUNY	20	4
CDI Labs	20	3
Department of Protein Science KTH - Royal Institute of Technology Stockholm	20	2
University of Texas	19	35
Erasmus Medical Center	19	30
European Bioinformatics Institute (EMBL-EBI)	19	25
American Museum of Natural History	19	24
Deakin University	19	24
New Jersey Institute of Technology	19	24
Okinawa Institute of Science and Technology	19	21
University of Konstanz	19	21
Duke University United States	19	19
Max Planck Institute of Molecular Cell Biology and Genetics Dresden Germany	19	18
Gregor Mendel Institute	19	17
Centre for Addiction and Mental Health	19	16
Universidad de Buenos Aires	19	14
Xi'an Jiaotong University	19	14
German Cancer Research Center (DKFZ) Heidelberg Germany	19	13
Heinrich Heine University	19	12
Institute of Neurology University College London	19	12
Marine Biological Laboratory	19	12
University College Cork	19	12
East China University of Science and Technology	19	11
Koc University	19	11
Chongqing University	19	10
Kobe University	19	10
Royal Institute of Technology	19	10
Universita degli Studi di Milano	19	10
Augusta University	19	9
BGI	19	9
Yonsei University	19	9
Drexel University College of Medicine	19	8
The Forsyth Institute	19	8
Amsterdam UMC	19	7
McDonnell Genome Institute	19	7
NTNU	19	7
UNAM	19	6
Birmingham Women's NHS Foundation Trust	19	5
National Health Research Institutes	19	5
UFRJ	19	5
Institute of Experimental Medicine	19	4
The Hospital for Sick Children Research Institute	19	2
Indian Institute of Rice Research	19	1
European Bioinformatics Institute	18	52
Max Planck Institute for Psycholinguistics	18	35
Nanjing University	18	31
German Centre for Integrative Biodiversity Research (iDiv) Halle-Jena-Leipzig	18	28
University of Iceland	18	27
Allen Institute for Brain Science Seattle Washington 98109 USA	18	18
Janelia Research Campus Howard Hughes Medical Institute Ashburn VA 20147	18	18
Boyce Thompson Institute	18	17
The Walter & Eliza Hall Institute of Medical Research	18	17
Donnelly Centre University of Toronto	18	16
Google Inc.	18	16
Mahidol University	18	16
University of Texas at El Paso	18	16
KAUST	18	15
RIKEN Center for Integrative Medical Sciences	18	15
Syracuse University	18	15
University of Central Florida	18	15
University of Washington United States	18	14
Lancaster University	18	13
Northeast Agricultural University	18	13
University of Cambridge UK	18	12
Xiamen University	18	12
Bar-Ilan University	18	11
Curtin University	18	11
Rochester Institute of Technology	18	11
The Broad Institute 415 Main St. Cambridge MA 02142 USA	18	11
Universite Libre de Bruxelles	18	11
Netherlands Institute for Neuroscience KNAW	18	9
Telethon Institute of Genetics and Medicine (TIGEM)	18	9
The Hebrew University of Jerusalem Israel	18	9
Universidade de São Paulo	18	9
University of Hamburg	18	9
Desert Research Institute	18	8
University of Tübingen	18	8
UNSW Sydney	18	8
Xinhua Hospital Affiliated to Shanghai Jiao Tong University School of Medicine	18	8
RIKEN Center for Sustainable Resource Science	18	7
Universidade Federal de Pernambuco	18	7
Centenary Institute The University of Sydney	18	6
Infectious Disease Research Institute	18	6
Max Planck Institute of Neurobiology	18	6
Peking Union Medical College Hospital	18	6
University of Texas Medical Branch at Galveston	18	6
Guangzhou Women and Children's Medical Center	18	5
Indian Institute of Technology Kanpur	18	5
Memorial Sloan Kettering	18	5
NHS Lothian	18	5
Microsoft	18	4
North-Eastern Hill University	18	4
Memorial Sloan Kettering Cancer Ctr	18	3
University of Crete School of Medicine	18	2
Centre Hospitalier Universitaire de Nantes	18	1
E. O. Lawrence Berkeley National Laboratory	18	1
Janssen Prevention Center Janssen Pharmaceutical Companies of Johnson & Johnson	18	1
Sup'Biotech	18	1
University of British Columbia and BC Childrens Hospital	18	1
Helmholtz Center Munich	17	27
The University of Texas at Dallas	17	22
UT Southwestern	17	20
Children's National Medical Center	17	19
Senckenberg Biodiversity and Climate Research Centre	17	18
Institute of Hydrobiology Chinese Academy of Sciences	17	17
University of Hawaii at Manoa	17	17
University of Puerto Rico	17	15
Institute of Molecular Life Sciences University of Zurich Switzerland	17	14
University of Potsdam	17	14
University of Warsaw	17	14
Eotvos Lorand University	17	13
OHSU	17	13
University of Cincinnati College of Medicine	17	13
Dartmouth	17	12
Indian Institute of Science Bangalore	17	12
Keio University	17	12
Nanjing Medical University	17	12
University of Maryland Baltimore	17	12
VIB-UGent Center for Plant Systems Biology	17	12
Beijing Institute of Genomics	17	11
Ben Gurion University of the Negev	17	11
National Marrow Donor Program	17	11
Royal Botanic Gardens Kew	17	11
University of Maine	17	11
University of Michigan United States	17	11
Ben-Gurion University	17	10
Chan Zuckerberg Biohub	17	10
Chulalongkorn University	17	10
Friedrich Miescher Institute for Biomedical Research Basel Switzerland	17	10
Institute of Zoology	17	10
International Potato Center	17	10
Rensselaer Polytechnic Institute	17	10
Sapienza University of Rome	17	10
Southwest University China	17	10
Universidad de Costa Rica	17	10
Institute of Life Sciences	17	9
uBiome	17	9
Yonsei University College of Medicine	17	9
Indian Institute of Technology Guwahati	17	8
Nara Institute of Science and Technology	17	8
National Chung Hsing University	17	8
University of Cagliari	17	8
University of Nevada Reno School of Medicine	17	8
University of Verona	17	8
AgResearch	17	7
Chinese Center for Disease Control and Prevention	17	7
DuPont Pioneer	17	7
National Institute for Public Health and the Environment	17	7
School of Life Sciences Sun Yat-sen University	17	7
Zhongshan Hospital Fudan University	17	7
Roswell Park Comprehensive Cancer Center	17	6
Institute of Marine Research	17	5
Research Institute for Microbial Diseases Osaka University	17	5
Altius Institute for Biomedical Sciences	17	4
Amgen Inc. Thousand Oaks CA USA.	17	3
Beijing Institute of Technology	17	3
Laboratory of Molecular Immunology The Rockefeller University New York NY 10065 USA.	17	3
Northwest University	17	3
Cleveland Clinic Foundation	17	2
Department of Psychology Bielefeld University Bielefeld Germany	17	2
Fondazione IRCCS Istituto Neurologico C. Besta	17	2
Max Planck Institute for Demographic Research	17	2
NIBR	17	2
School of Biological Sciences Illinois State University	17	2
Department of Life Sciences Silwood Park Campus Imperial College London	17	1
INRA/Uni. Bordeaux UMR1202 Biodiversity Genes and Communities F-33610/33400 Cestas/Talence	17	1
Peking University 3rd Hospital	17	1
Aarhus University Hospital	16	28
Helmholtz Zentrum Muenchen	16	25
Institut Pasteur Paris	16	24
23andMe	16	23
University of Bari	16	22
Temasek Life Sciences Laboratory	16	21
Karolinska Institutet Stockholm Sweden	16	20
University of California at San Diego	16	20
Hong Kong Baptist University	16	19
The Johns Hopkins University School of Medicine	16	19
University of St. Andrews	16	19
Developmental and Stem Cell Biology Hospital for Sick Children	16	17
KTH Royal Institute of Technology	16	17
UPMC	16	17
City of Hope	16	16
Department of Genetics Harvard Medical School Boston MA 02115 USA	16	16
Aix-Marseille University	16	15
Hiroshima University	16	14
SUNY Downstate Medical Center	16	14
Baylor University	16	13
Jawaharlal Nehru University	16	12
McGill	16	12
Guangzhou Institutes of Biomedicine and Health Chinese Academy of Sciences	16	11
Institut National de la Recherche Agronomique	16	11
Liverpool John Moores University	16	11
National Heart Lung and Blood Institute National Institutes of Health	16	11
RIKEN Center for Brain Science	16	11
Universite de Lyon	16	11
University of Washington School of Medicine	16	11
Ewha Womans University	16	10
UMASS Medical School	16	10
University of Salzburg	16	10
University of Stirling	16	10
Wyss Institute at Harvard University	16	10
College of William and Mary	16	9
deCODE genetics/Amgen Inc. Reykjavik Iceland	16	9
Hunan Normal University China	16	9
Indian Institute of Science Education and Research Kolkata	16	9
Massachusetts General Hospital Harvard Medical School	16	9
Ottawa Hospital Research Institute	16	9
Universite du Quebec a Montreal	16	9
University of Hyderabad	16	9
University of Naples Federico II	16	9
Joint Genome Institute	16	8
Radboud University Donders Institute for Brain Cognition and Behaviour	16	8
Tampere University of Technology	16	8
United States Department of Agriculture	16	8
University of Waikato	16	8
Jiangsu University	16	7
Universidad de Murcia	16	7
Bayer AG	16	6
Direct Genomics Co. Ltd	16	6
Hudson Institute of Medical Research	16	6
Keck Graduate Institute	16	6
National Institute on Drug Abuse	16	6
Sorbonne Universite CNRS LBDV Villefranche-sur-mer	16	6
University of Missouri-Columbia	16	6
Washington University in St. Louis School of Medicine	16	6
Centro Nacional de Investigaciones Cardiovasculares Carlos III (CNIC)	16	5
Cleveland Clinic Lerner Research Institute	16	5
Complete Genomics	16	5
Kazan Federal University	16	5
Ryerson University	16	5
Toronto Western Hospital	16	5
Universidade Federal do Rio Grande do Norte	16	5
Universidad Peruana Cayetano Heredia	16	5
University of Texas at MD Anderson	16	5
Biodiversity Research Center Academia Sinica Taipei 11529 Taiwan	16	4
Robert Koch-Institute	16	4
State Key Laboratory of Silkworm Genome Biology Southwest University	16	4
Third Military Medical University	16	4
Institute of Molecular Medicine Peking University	16	3
The Pirbright Institute Pirbright Surrey United Kingdom	16	3
Yunnan Agricultural University	16	3
Cincinnati Children's Hospital Medical Centre Cincinnati OH 45229 USA	16	1
Spanish National Cancer Research Centre (CNIO) Madrid Spain	16	1
The Broad Institute	15	39
Skolkovo Institute of Science and Technology	15	28
University of Nebraska Lincoln	15	22
Farm Animal Genetic Resources Exploration and Innovation Key Laboratory of Sichuan Province	15	21
Ludwig-Maximilians-University Munich	15	21
USC	15	21
The University of Western Ontario	15	19
Norwegian Centre for Mental Disorders Research Oslo University Hospital and University of Oslo	15	17
Swiss Institute of Bioinformatics	15	15
Bigelow Laboratory for Ocean Sciences	15	13
Ludwig-Maximilians-Universitat Munchen	15	13
The Mind Research Network	15	13
ETH-Zurich	15	12
Institute of Molecular Biology Mainz	15	12
EMBL-European Bioinformatics Institute	15	11
Max Planck Institute for Brain Research	15	11
National Cancer Institute NIH	15	11
Norwegian Institute of Public Health	15	11
Queensland Brain Institute	15	11
Royal Holloway University of London	15	11
South China Normal University	15	11
Hunter College	15	10
Max Planck Institute for Biological Cybernetics	15	10
Rhodes University	15	10
Science for Life Laboratory KTH - Royal Institute of Technology Stockholm	15	10
Tokai University	15	10
Allen Institute	15	9
Fondazione Edmund Mach	15	9
Indian Institute of Science Education and Research Mohali	15	9
Institute of Basic Medical Sciences Chinese Academy of Medical Sciences	15	9
Neuroscience Research Australia	15	9
Stanford Genome Technology Center	15	9
Universidade de Santiago de Compostela	15	9
University of Münster	15	9
Agroscope	15	8
National Jewish Health	15	8
School of Life Sciences University of Warwick	15	8
Shenzhen University Health Science Center	15	8
Thermo Fisher Scientific	15	8
University Children's Hospital Zurich	15	8
University of Nairobi	15	8
KEMRI-Wellcome Trust Research Programme Kilifi Kenya	15	7
McGovern Medical School at UTHealth	15	7
NC State University	15	7
Quadram Institute Bioscience	15	7
The Babraham Institute	15	7
Universidade Estadual do Norte Fluminense Darcy Ribeiro	15	7
University of Bremen	15	7
Centre for Eye Research Australia	15	6
INSERM U955	15	6
John Innes Centre Norwich Research Park United Kingdom	15	6
Rady Childrens Institute for Genomic Medicine San Diego CA USA	15	6
Swinburne University of Technology	15	6
University of Liverpool UK	15	6
Anhui Medical University	15	5
CRUK Beatson Institute	15	5
Johns Hopkins University Applied Physics Laboratory	15	5
Memorial Sloan Kettering Cancer Cente	15	5
Nancy E. and Peter C. Meinig School of Biomedical Engineering Cornell University	15	5
National Institute of Child Health and Human Development	15	5
Phosphorus Inc.	15	5
University of Veterinary Medicine Hannover	15	5
Leibniz Institute of Plant Genetics and Crop Plant Research	15	4
NHS Greater Glasgow and Clyde	15	4
Shanghai Center for Plant Stress Biology	15	4
University Hospital Cologne	15	4
California State University Fullerton	15	3
Celgene	15	3
deCODE genetics / Amgen Inc.	15	3
Federal University of Rio Grande do Norte (UFRN)	15	3
Institut de Genetique et de Biologie Moleculaire et Cellulaire	15	3
Laboratory of Myeloid Malignancies National Heart Lung and Blood Institute NIH	15	3
Technical University Berlin	15	3
University of Missouri - Kansas City	15	3
Zhejiang University School of Medicine China	15	3
Central Manchester University Hospitals NHS Foundation Trust	15	2
Northern Kentucky University	15	2
Triticeae Research Institute Sichuan Agricultural University	15	2
College of Agronomy Jiangxi Agricultural University	15	1
Comma Soft AG 53229 Bonn Germany	15	1
Drug Design and Selection GlaxoSmithKline	15	1
Massachusetts General Hospital Cancer Center Harvard Medical School Boston MA 02114	15	1
School of Life Sciences North China University of Science and Technology	15	1
Lausanne University Hospital	14	21
The Johns Hopkins University	14	21
Helmholtz Zentrum Munchen	14	18
Independent Researcher	14	18
Bilkent University	14	17
University of California-Davis	14	17
Max Planck Institute	14	16
MDC Berlin	14	16
University of Padua	14	16
Cancer Research UK Cambridge Institute	14	15
Department of Energy Joint Genome Institute	14	15
Joint BioEnergy Institute	14	15
City College of New York	14	14
National Research Council	14	14
BC Cancer Agency Genome Sciences Centre	14	13
Feinstein Institute for Medical Research	14	13
Heinrich Heine University Duesseldorf	14	13
University of California at Davis	14	13
TU Delft	14	12
University of Ulm	14	12
Broad Institute of Harvard and MIT Cambridge MA 02138 USA	14	11
Federal University of Sao Paulo	14	11
Indian Institute of Science Education and Research Bhopal	14	11
Morgridge Institute for Research	14	11
The Roslin Institute University of Edinburgh	14	11
The University of Iowa	14	11
VU University	14	11
ENS de Lyon	14	10
Harvard Medical School United States	14	10
Institute for Molecular Bioscience	14	10
Medical Research Council Laboratory of Molecular Biology	14	10
Politecnico di Milano	14	10
Swarthmore College	14	10
University of Valencia	14	10
All India Institute of Medical Sciences	14	9
Feinberg School of Medicine Northwestern University	14	9
Google Brain	14	9
National Human Genome Research Institute National Institutes of Health	14	9
Peter MacCallum Cancer Centre	14	9
Russian Academy of Sciences	14	9
Telethon Kids Institute The University of Western Australia	14	9
The University of British Columbia	14	9
Universidade Federal do ABC	14	9
Wadsworth Center	14	9
Zhejiang University School of Medicine	14	9
Albany Medical College	14	8
AMOLF	14	8
Harbin Institute of Technology	14	8
Kansai Medical University	14	8
UCSB	14	8
Universidade Federal do Parana	14	8
Weizmann Institute of Sciences	14	8
Centro Nacional de Investigaciones Cardiovasculares (CNIC)	14	7
Chengdu University of Traditional Chinese Medicine	14	7
Department of Biology Stanford University	14	7
Genentech Inc	14	7
San Jose State University	14	7
The Francis Crick Institute London UK	14	7
Universitat Politecnica de Catalunya	14	7
University of Arkansas Fayetteville	14	7
University of Bristol United Kingdom	14	7
China Academy of Chinese Medical Sciences	14	6
CSIR-Indian Institute of Chemical Biology	14	6
Hofstra University	14	6
Institute of Biotechnology University of Helsinki	14	6
IRB Barcelona	14	6
Nirma University	14	6
Pasteur Institute of Iran	14	6
Queens University Belfast	14	6
Ruhr-University Bochum	14	6
UCB Pharma	14	6
Universitat de Lleida	14	6
University of Colorado Denver Anschutz Medical Campus	14	6
A.C. Camargo Cancer Center	14	5
Brigham and Womens Hospital and Harvard Medical School	14	5
Garvan Institute of Medical Research Darlinghurst New South Wales Australia	14	5
Instituto Butantan	14	5
University of KwaZulu-Natal	14	5
University of Stuttgart	14	5
Beckman Research Institute City of Hope	14	4
Brain Center Rudolf Magnus Univ Med Ctr Utrecht Utrecht The Netherlands	14	4
Centro de Biologia Molecular Severo Ochoa	14	4
Harvard University T H Chan School of Public Health	14	4
Institute of Cotton Research Chinese Academy of Agricultural Sciences	14	4
James Madison University	14	4
National Institute of Immunology	14	4
Oswaldo Cruz Institute	14	4
Royal Brompton Hospital	14	4
URGI INRA Université Paris-Saclay 78026 Versailles France	14	4
Aix Marseille Univ CNRS IBDM	14	3
CSIR Institute of Genomics and Integrative Biology	14	3
Department of Neuroscience Friedman Brain Institute Icahn School of Medicine at Mount Sinai	14	3
Editas Medicine	14	3
Federal University of Santa Catarina	14	3
Indiana University Bloomington U.S.A.	14	3
Instituto Evandro Chagas	14	3
Kunming Institute of Botany Chinese Academy of Sciences	14	3
Max-Delbrueck-Center for Molecular Medicine	14	3
Peking University People's Hospital	14	3
Sichuan Agricultural University China	14	3
Team NeurON Texila American University	14	3
Telethon Kids Institute The University of Western Australia Perth Australia	14	3
Palacky University Olomouc	14	2
Zhongshan Ophthalmic Center，Sun Yat-Sen University	14	2
CICbioGUNE	14	1
Inst. of Medical & Molecular Genetics INGEMM-CIBERER-IdiPAZ Hospital La Paz Madrid	14	1
NIMH	13	24
Institute of Biophysics Chinese Academy of Sciences	13	22
New York University Langone Medical Center	13	22
HHMI Janelia	13	20
McDonnell Genome Institute Washington University School of Medicine	13	17
Santa Fe Institute	13	17
Department of Genetics University of Cambridge	13	16
Max Planck Institute for Human Development	13	16
Freie Universität Berlin	13	15
Institute for Molecular Bioscience University of Queensland	13	15
Johns Hopkins University School of Medicine Baltimore Maryland USA	13	15
Peking University China	13	15
Department of Biomolecular Engineering University of California Santa Cruz	13	14
State University of New York at Buffalo	13	14
Duke	13	13
Max Planck Institute for Terrestrial Microbiology	13	13
University of Ibadan Nigeria	13	13
Friedrich Schiller University Jena	13	12
National University of Ireland Galway	13	12
University of Ghana	13	12
Arkansas State University	13	11
Leiden University Medical Centre	13	11
Michigan State University United States	13	11
Agriculture and Agri-Food Canada	13	10
Aix-Marseille Universite	13	10
Charite	13	10
Counsyl	13	10
Linköping University	13	10
MRC Unit for Lifelong Health and Ageing at UCL	13	10
UW	13	10
Whitehead Institute	13	10
Cambridge Institute for Medical Research	13	9
Canada's Michael Smith Genome Sciences Centre BC Cancer Agency	13	9
H. Lee Moffitt Cancer Center and Research Institute	13	9
Martin Luther University Halle-Wittenberg	13	9
Mount Sinai Hospital	13	9
Rothamsted Research	13	9
University of Colorado at Boulder	13	9
University of Ljubljana	13	9
University of Pennsylvania United States	13	9
Broad Institute and MIT	13	8
French National Centre for Scientific Research	13	8
Institute of Neuroscience Chinese Academy of Sciences	13	8
Leibniz Institute of Plant Genetics and Crop Plant Research (IPK)	13	8
Manchester Metropolitan University	13	8
The Novo Nordisk Foundation Center for Biosustainability	13	8
University of Denver	13	8
University of Ghent	13	8
Western Washington University	13	8
Competence Centre on Health Technologies Tartu Estonia	13	7
Fondazione Bruno Kessler	13	7
Functional Genomics Department Lawrence Berkeley National Laboratory Berkeley CA	13	7
Illinois Institute of Technology	13	7
Max-Planck-Institute for Molecular Genetics	13	7
National Institute of Neurological Disorders and Stroke	13	7
Pomona College	13	7
Swiss Federal Institute of Technology Lausanne (EPFL)	13	7
Universidad San Francisco de Quito	13	7
Wenzhou Medical University	13	7
Animal Health Trust	13	6
Centers for Disease Control and Prevention United States	13	6
Central Michigan University	13	6
Cornell	13	6
Department of Medicine University of Cambridge	13	6
Indian Institute of Science Education and Research	13	6
JNU	13	6
Singapore Immunology Network	13	6
SUNY Albany	13	6
Tokai University School of Medicine	13	6
Universidad Rey Juan Carlos	13	6
University of Wurzburg	13	6
Barts Cancer Institute Queen Mary University of London	13	5
Ecole polytechnique federale de Lausanne (EPFL)	13	5
European Institute of Oncology	13	5
Radboud University Faculty of Science Radboud Institute for Molecular Life Sciences	13	5
Universiti Putra Malaysia	13	5
University of Miyazaki	13	5
VIB-KU Leuven	13	5
ANSES	13	4
Department of Molecular Biology Umea University	13	4
Ghent University Hospital	13	4
Institute of Biochemistry and Biophysics	13	4
International Maize and Wheat Improvement Center (CIMMYT)	13	4
Nanjing Forestry University	13	4
National Center for Global Health and Medicine	13	4
Northeast Ohio Medical University	13	4
QIMR BERGHOFER	13	4
Shanghai Ocean University China	13	4
University of Brasilia	13	4
Virta Health	13	4
Walter and Eliza Hall Institute	13	4
Beatson Institute	13	3
CeMM Research Center for Molecular Medicine of the Austrian Academy of Sciences Vienna Austria	13	3
Chinese Academy of Sciences Beijing	13	3
Department of Human Genetics Radboud University Medical Center	13	3
Division of Biology and Biological Engineering California Institute of Technology Pasadena CA	13	3
Goethe-University Frankfurt Germany	13	3
Guardant Health Inc	13	3
Huashan Hospital Fudan University	13	3
Institut Jules Bordet	13	3
Lincoln University New Zealand	13	3
NIDCD/NIH	13	3
Universitatsklinikum Erlangen	13	3
Complejo Hospitalario de Navarra	13	2
Huazhong Agriculture University	13	2
Institut Necker Enfants Malades	13	2
Sainte-Justine University Hospital Research Center	13	2
UAntwerpen	13	2
Boston Children's Hospital Howard Hughes Medical Institute Harvard Stem Cell Institute	13	1
Child Neurology Department of Pediatrics Amsterdam UMC location VUmc Amsterdam the Netherlands	13	1
GIBH CAS	13	1
National Cancer Center Singapore	13	1
North China University of Science and Technology	13	1
Revolution Medicines	13	1
School of Life Science and Technology Xi'an Jiaotong University	13	1
Oxford	12	43
University of Edinburgh Edinburgh UK	12	25
Flatiron Institute	12	22
Heidelberg Institute for Theoretical Studies	12	20
Helmholtz Zentrum Munich	12	20
Radboud University Medical Centre	12	20
CSIC	12	19
Human Longevity Inc. San Diego CA USA	12	17
IBM	12	17
City University of New York	12	16
Scripps Research	12	15
UMMS	12	15
Institute of Molecular and Cell Biology	12	14
National Institute for Physiological Sciences	12	14
RWTH Aachen University Hospital	12	14
Yale School of Public Health	12	14
Beth Israel Deaconess Medical Center / Harvard Medical School	12	13
Katholieke Universiteit Leuven	12	13
School of Life Sciences University of Dundee	12	13
University of Minnesota - Twin Cities	12	13
Waseda University	12	13
California Academy of Sciences	12	12
Microsoft Research	12	12
Salk Institute	12	12
Simons Foundation	12	12
Douglas Mental Health University Institute	12	11
Rutgers University-Newark	12	11
The University of Oregon	12	11
Universite de Bordeaux	12	11
University of California San Diego United States	12	11
Institute of Neuroscience Newcastle University	12	10
Memorial University	12	10
MPI for Developmental Biology	12	10
QIMR	12	10
Saarland University	12	10
Seattle Children's Hospital	12	10
Tokyo Medical and Dental University	12	10
University of the West of England	12	10
Wilfrid Laurier University	12	10
Duke NUS Medical School	12	9
Samsung Medical Center	12	9
Swedish Museum of Natural History	12	9
Université de Sherbrooke	12	9
Africa Health Research Institute	12	8
Bio-X Institutes Shanghai Jiao Tong Univ.	12	8
Champalimaud Neuroscience Programme Champalimaud Centre for the Unknown Lisbon Portugal	12	8
CONICET	12	8
Institute for Behavioral Genetics University of Colorado Boulder	12	8
Luxembourg Institute of Health	12	8
National Center for Advancing Translational Sciences NIH Rockville Maryland	12	8
University at Albany	12	8
University of California Davis United States	12	8
University of New Brunswick	12	8
University of Toyama	12	8
Advanced Genomics Technology Lab Complete Genomics Inc.	12	7
ATR	12	7
Department of Medical Biochemistry and Biophysics Karolinska Institutet Stockholm Sweden	12	7
ICGEB	12	7
Structural Genomics Consortium University of Toronto	12	7
Tufts Medical Center	12	7
UNESP	12	7
Universiteit Utrecht	12	7
University of Colorado Denver - Anschutz Medical Campus	12	7
University of Perugia	12	7
Adam Mickiewicz University	12	6
Canadian Centre for Computational Genomics; McGill University and Genome Quebec Innovation Center	12	6
Institute of Bioengineering School of Life Sciences Ecole Polytechnique Federale de Lausanne	12	6
Institute of Molecular Genetics Academy of Sciences of the Czech Republic	12	6
International Agency of Research on Cancer	12	6
Iwate Biotechnology Research Center	12	6
Kwansei Gakuin University	12	6
National Institute on Aging National Institutes of Health	12	6
School of Behavioral and Brain Sciences The University of Texas at Dallas	12	6
School of Life Sciences Tsinghua University	12	6
Tokyo University of Science	12	6
University of California Santa Cruz Genomics Institute	12	6
University of Louisiana at Lafayette	12	6
University of Rome Tor Vergata	12	6
University of Siena	12	6
Helsinki University Central Hospital	12	5
National Cancer Institute National Institutes of Health	12	5
National Centre for Cell Science	12	5
Norwegian Institute of Bioeconomy Research	12	5
The University of Edinburgh United Kingdom	12	5
UCL Institute of Neurology Queen Square London WC1N 3BG UK	12	5
UNIFESP	12	5
Universiteit Antwerpen	12	5
University of Buea	12	5
University of Massachussetts Medical School	12	5
University of Nevada Las Vegas	12	5
Ariel University	12	4
Calico Life Sciences LLC	12	4
Donders Institute	12	4
Huashan Hospital Fudan University China	12	4
Interventional Hospital of Shandong Red Cross Society	12	4
Kyungpook National University	12	4
Leeds Teaching Hospitals NHS Trust	12	4
National Center for Biotechnology Information National Library of Medicine NIH	12	4
Shanxi Medical University	12	4
Tehran University of Medical Sciences	12	4
Tennessee State University	12	4
Tokyo Metropolitan Institute of Medical Science	12	4
US Army Medical Research Institute of Infectious Diseases	12	4
Beijing animal sciences institution	12	3
COMSATS University Islamabad	12	3
Federal University of Rio Grande do Sul	12	3
GlaxoSmithKline Research and Development	12	3
GNF	12	3
Harbin Medical University	12	3
Institute of Applied Ecology Chinese Academy of Sciences	12	3
Institute of Biochemistry and Biophysics PAS	12	3
Medical University Graz	12	3
Merck	12	3
NIHR Biomedical Res Centre at Moorfields Eye Hospital NHS Fdn Trust and UCL Inst of Ophthalmology	12	3
Pfizer Worldwide Research and Development	12	3
Radboudumc Donders Institute for Brain Cognition and Behaviour	12	3
Royal Devon and Exeter NHS Foundation Trust	12	3
Shandong Academy of Agricultural Sciences	12	3
Sorbonne Universite CNRS Integrative Biology of Marine Models Station Biologique de Roscoff	12	3
Université de Tours	12	3
Universite du Quebec a Trois-Rivieres	12	3
University of Hong Kong China	12	3
VIB/UGent	12	3
VU University Medical Center Netherlands	12	3
Bellvitge Biomedical Research Institute - IDIBELL	12	2
Department of Biomedical Sciences City University of Hong Kong Kowloon Tong Hong Kong	12	2
Department of Immunology Max Planck Institute for Infection Biology	12	2
Dept. of Haematology University of Cambridge/NIHR BioResource	12	2
F. Hoffmann-La Roche	12	2
Institute of Chinese Materia Medica China Academy of Chinese Medical Sciences	12	2
Instituto Oswaldo Cruz Fiocruz	12	2
Jilin Academy of Agricultural Sciences	12	2
Medical University of Gdansk	12	2
Nabsys 2.0	12	2
Nationwide Children's Hospital United States	12	2
Oxford Radcliffe Hospitals NHS Trust	12	2
Sequenom Laboratories	12	2
Thync Inc.	12	2
University of Texas Health San Antonio	12	2
Africa city of Technology-Department of Biotechnology- Sudan	12	1
Department of Entomology Centro de Pesquisas Aggeu Magalhaes Fundacao Oswaldo Cruz-Pernambuco	12	1
Dept. of Clin. Biochem. Faculty of Pharmacy Collegium Medicum Nicolaus Copernicus Univ.	12	1
Gunma University Graduate School of Health Sciences	12	1
Institute of Molecular and Clinical Ophthalmology Basel Basel Switzerland	12	1
Juntendo University Faculty of Medicine & Graduate School of Medicine	12	1
Korea University Guro Hospital	12	1
Laboratory of Systems Virology Institute for Frontier Life and Medical Sciences Kyoto University	12	1
MGP MetaGenoPolis INRA Universite Paris-Saclay 78350 Jouy en Josas France	12	1
North West London Hospitals NHS Trust	12	1
University of Arizona Tucson Arizona 85719. USA.	12	1
Yunnan Key Lab. for Basic Res. on Bone & Joint Dis.; Yunnan Stem Cell Translational Res. Ctr.	12	1
Ecole normale superieure	11	44
UCSC	11	29
ENS	11	22
University of Cambridge United Kingdom	11	19
Universite Pierre et Marie Curie	11	18
Spanish National Cancer Research Centre (CNIO)	11	17
Cardiff University School of Medicine	11	16
Frankfurt Institute for Advanced Studies	11	15
Uppsala Universitet	11	15
Hospital for Special Surgery	11	14
Swiss Federal Institute of Technology (EPFL)	11	14
Universite Cote d'Azur	11	14
Leibniz-Institute of Freshwater Ecology and Inland Fisheries	11	13
Naturalis Biodiversity Center	11	13
Academy of Mathematics and Systems Science Chinese Academy of Sciences	11	12
National Centre for Biological Sciences Tata Institute of Fundamental Research	11	12
University of Aarhus	11	12
University of Milano-Bicocca	11	12
Vrije Universiteit Brussel	11	12
CINVESTAV	11	11
Department of Molecular and Cell Biology University of California Berkeley	11	11
Department of Plant Sciences University of Cambridge	11	11
Garvan Institute of Medical Research Sydney Australia	11	11
German Primate Center	11	11
Hainan University	11	11
Institut Jacques Monod	11	11
Department of Ophthalmology Wilmer Eye Institute The Johns Hopkins University School of Medicine	11	10
MRC Cognition and Brain Sciences Unit	11	10
Otto-von-Guericke-University Magdeburg	11	10
Sainsbury Laboratory University of Cambridge	11	10
SynthSys and School of Biological Sciences University of Edinburgh	11	10
Technion Israel Institute of Technology	11	10
Université Libre de Bruxelles	11	10
University Hospital Zurich	11	10
University of Lincoln	11	10
Buck Institute for Research on Aging	11	9
China Medical University	11	9
City University of London	11	9
Institute for Molecular Medicine Finland	11	9
Institute of Translational Medicine University of Liverpool	11	9
Jagiellonian University	11	9
NINDS	11	9
Pennsylvania State University College of Medicine	11	9
UBC	11	9
Universiteit Gent	11	9
University of Iowa United States	11	9
University of the Witwatersrand	11	9
University of Toulouse	11	9
Centre for Eye Research Australia University of Melbourne Royal Victorian Eye and Ear Hospital	11	8
Cinvestav	11	8
Ecole Polytechinique Federale de Lausanne (EPFL)	11	8
Federal University of Minas Gerais	11	8
Max Planck Institute for Biology of Ageing	11	8
School of Biological Sciences University of Canterbury Christchurch New Zealand	11	8
Scripps Research Institute	11	8
Universidade Federal de Vicosa	11	8
Universite de Strasbourg	11	8
California Department of Public Health	11	7
Charite Universitatsmedizin Berlin	11	7
EMBL Australia Node in Single Molecule Science School of Medical Sciences UNSW	11	7
INRS-Institut Armand-Frappier	11	7
Institute of Mental Health The Sixth Hospital Peking University	11	7
Institute of Neuroscience	11	7
ISI Foundation	11	7
LANGEBIO-CINVESTAV	11	7
Max Planck Institute for Molecular Genetics Berlin Germany	11	7
Natural Resources Institute Finland	11	7
Université Paris-Sud	11	7
University of Nevada	11	7
Verily Life Sciences	11	7
Weill Cornell Medicine - Qatar	11	7
Beijing Institute of Radiation Medicine	11	6
Gero LLC	11	6
Hadassah-Hebrew University Medical Center	11	6
Humboldt University	11	6
Indian Institute of Technology Kharagpur	11	6
Institute for Stem Cell Biology and Regenerative Medicine (inStem)	11	6
Instituto Gulbenkian de Ciência	11	6
Osaka City University	11	6
Paul Scherrer Institute	11	6
Silesian University of Technology	11	6
The Institute of Cancer Research London UK	11	6
University of Huddersfield	11	6
University of Virginia United States	11	6
University of Wisconsin School of Medicine & Public Health	11	6
Yamaguchi University	11	6
Boston Children's Hospital Harvard Medical School	11	5
CIMMYT	11	5
CIRI	11	5
Department of Biochemistry University of Calcutta	11	5
Ecole normale superieure de Lyon	11	5
Friedrich Miescher Laboratory of the Max Planck Society	11	5
Indiana University United States	11	5
Institute of Disease Control and Prevention PLA	11	5
Korea University	11	5
Max Delbrueck Center for Molecular Medicine Germany	11	5
MPI-CBG	11	5
MRC Centre for Neuropsychiatric Genetics and Genomics Cardiff University UK	11	5
National Agriculture and Food Research Organization	11	5
National Center for Biotechnology Information	11	5
Oxford Centre for Diabetes Endocrinology and Metabolism University of Oxford	11	5
Papworth Hospital NHS Foundation Trust	11	5
Rutgers Robert Wood Johnson Medical School	11	5
ULB	11	5
Universidad de Antioquia	11	5
University of Luebeck Germany	11	5
University of Sydney Australia	11	5
UW-Madison	11	5
California State University Los Angeles	11	4
Center for Molecular Neurobiology Hamburg	11	4
Centre for Integrative Biology University of Trento Italy	11	4
China Pharmaceutical University	11	4
Department of Neuroscience Erasmus MC Rotterdam 3000 CA the Netherlands	11	4
Eberhard Karls Universitat Tubingen	11	4
Hospital de la Santa Creu i Sant Pau Barcelona Spain	11	4
Ifakara Health Institute	11	4
Institute of Molecular Genetics Russian Academy of Sciences Moscow 123182 Russia	11	4
International Centre for Genetic Engineering and Biotechnology	11	4
Jamia Millia Islamia	11	4
Justus-Liebig University Giessen	11	4
Khon Kaen University	11	4
KIIT University	11	4
MGH	11	4
National Institutes for Quantum and Radiological Science and Technology	11	4
Newcastle Fibrosis Research Group Institute of Cellular Medicine Newcastle University	11	4
New Zealand Institute for Plant and Food Research Ltd.	11	4
Philipps-University Marburg	11	4
Providence College	11	4
Singapore General Hospital	11	4
Universidad de Sevilla	11	4
Universitat Politècnica de València	11	4
University of Virginia Health System	11	4
Wayne State University School of Medicine	11	4
Aix-Marseille Univ	11	3
Benson Hill Biosystems	11	3
Columbia University Fertility Center	11	3
Department of Oncology University of Oxford	11	3
Great Ormond Street Hospital for Children NHS Foundation Trust	11	3
Henan Academy of Agricultural Sciences	11	3
Host-Parasite Interaction Biology Group National Institute of Malaria Research Delhi	11	3
Icahn School of Medicine at Mount Sinai & Icahn Inst for Genomics and Multi-scale Biology	11	3
Institute of Molecular and Cell Biology Singapore	11	3
Jiangsu Normal University	11	3
Max-Delbruck-Center for Molecular Medicine Berlin Germany	11	3
NIH/NICHD	11	3
State Key Lab of Stem Cell & Reproductive Biology Institute of Zoology Chinese Academy of Sciences	11	3
the Pennsylvania State University	11	3
University of Vermont Larner College of Medicine	11	3
AbbVie	11	2
Biomarker Technologies Corporation	11	2
Boston University United States	11	2
Centre for Biodiversity Genomics University of Guelph	11	2
Centre for Organismal Studies Heidelberg	11	2
Ekiti State University Nigeria	11	2
Indiana University Purdue University Indianapolis	11	2
INMED INSERM U1249	11	2
Institute of Neuroinformatics University of Zurich and ETH Zurich 8057 Zurich Switzerland	11	2
Institut Fresnel	11	2
Laboratoire Physico Chimie Curie Institut Curie PSL Research University CNRS UMR168	11	2
MPOB	11	2
MTA-SZTE Research Group for Cortical Microcircuits University of Szeged	11	2
New York City Department of Health and Mental Hygiene	11	2
Nippon Medical School	11	2
Peking Univ Sixth Hosp Inst of Mental Health Natl Clin Res Ctr for Mental Disorders	11	2
Pharmacology and Drug Safety Research Gedeon Richter Plc. Budapest Hungary	11	2
State Key Laboratory of Barley and Yak Germplasm Resources and Genetic Improvement	11	2
Synthetic and System Biology Unit Institute of Biochemistry Biological Research Centre Szeged	11	2
UFES	11	2
University of Calgary Canada	11	2
University of Texas at Austin United States	11	2
ACTREC Tata Memorial Centre	11	1
Beijing University of Chemical Technology	11	1
Centre de Recherche en Cancerologie de Lyon France	11	1
Department of Comparative Biomedical Sciences The Royal Veterinary College University of London	11	1
Department of Neurology Massachusetts General Hospital Boston MA	11	1
Department of Rheumatology and Immunology Peking University People's Hospital	11	1
European Institute of Oncology Italy	11	1
Haematopoietic Stem Cell Biology Laboratory MRC Weatherall Institute of Molecular Medicine (WIMM).	11	1
IBMC and I3S	11	1
INSERM U1109 Strasbourg	11	1
Institute of Computing Technology CAS	11	1
Institute of Genetic Medicine Newcastle University UK	11	1
Instituto Oswaldo Cruz Rio de Janeiro	11	1
MRC LMS Imperial College	11	1
Proteomics and Structural Biology Unit CSIR-Institute of Genomics and Integrative Biology	11	1
SUN YAT-SEN UNIVERSITY CANCER CENTER CHINA	11	1
The Third Affiliated Hospital of Southern Medical University	11	1
The University of the West Indies St Augustine	11	1
University of Newcastle Callaghan NSW Australia	11	1
William Harvey Research Institute	11	1
Department of Genome Sciences University of Washington	10	44
University of Exeter Medical School	10	34
University of Texas Austin	10	33
Sanger Institute	10	28
Stanley Center for Psychiatric Research Broad Institute of MIT and Harvard	10	24
The City College of New York	10	24
Berlin Institute for Medical Systems Biology Max Delbrueck Center for Molecular Medicine	10	20
Max-Eder Research Group for Pediatric Sarcoma Biology Institute of Pathology LMU Munich Germany	10	20
University of Edinburgh United Kingdom	10	20
University of Mississippi Medical Center	10	19
JCVI	10	18
The Roslin Institute	10	17
DeepMind	10	16
Institut Pasteur de Lille	10	16
MRC Biostatistics Unit	10	16
University College London UK	10	16
University Hospital of Lausanne	10	16
Baylor College of Medicine Houston TX	10	15
USDA ARS	10	15
Griffith University	10	13
Max Planck Institute for Evolutionary Anthropology Leipzig Germany	10	13
Duke-NUS Graduate Medical School	10	12
European Research Institute for the Biology of Ageing	10	12
Hebrew University	10	12
National Institute of Mental Health National Institutes of Health	10	12
Shaanxi University of Chinese Medicine	10	12
State Key Laboratory of Pathogen and Biosecurity Beijing Institute of Microbiology and Epidemiology	10	12
Technische Universitat Munchen	10	12
Universitat de Valencia	10	12
University College London London UK	10	12
Barcelona Supercomputing Center	10	11
Department of Pharmaceutical Chemistry University of California San Francisco	10	11
Duke-NUS Medical School National University of Singapore	10	11
Georg-August-University Goettingen	10	11
Inria	10	11
MRC Centre for Neuropsychiatric Genetics and Genomics Cardiff University	10	11
Smithsonian Institution	10	11
University of the Sunshine Coast	10	11
EBI	10	10
Jackson Laboratory	10	10
Los Angeles Biomedical Research Institute at Harbor-UCLA Medical Center	10	10
Mount Sinai Health System	10	10
Ritsumeikan University	10	10
The Center for Genome Architecture Baylor College of Medicine	10	10
University of Alaska Fairbanks	10	10
Children's Hospital Boston	10	9
IBENS	10	9
Icahn School of Medicine at Mount Sinai New York NY	10	9
Institute for Research in Biomedicine (IRB Barcelona)	10	9
St. Petersburg State University	10	9
ETH Zürich	10	8
Garvan Institute of Medical Research Darlinghurst New South Wales 2010 Australia	10	8
Heriot-Watt University	10	8
Max Planck Florida Institute for Neuroscience	10	8
Max Planck Institute of Biophysics	10	8
Memorial Sloan Kettering Cancer Center; Weill Cornell Medical College	10	8
Moredun Research Institute	10	8
National Institute of Neurological Disorders and Stroke National Institutes of Health	10	8
National Key Laboratory of Crop Genetic Improvement Huazhong Agricultural University	10	8
The University of Birmingham	10	8
Trent University	10	8
Universite de Geneve	10	8
University of Rhode Island	10	8
Wellcome Trust Centre for Human Genetics	10	8
Zoological Society of London	10	8
Binghamton University	10	7
King's College London London UK	10	7
Luxembourg Centre for Systems Biomedicine	10	7
Max Planck Institute for Infection Biology	10	7
Okayama University	10	7
Okinawa Institute of Science and Technology Graduate University	10	7
State University of Campinas	10	7
St George's University of London	10	7
The University of Washington	10	7
Tokyo University of Agriculture and Technology	10	7
Universitat de les Illes Balears	10	7
Universite de Lille	10	7
University of Otago Christchurch	10	7
WEHI	10	7
Department of Neurology Perelman School of Medicine University of Pennsylvania	10	6
Georgetown University Medical Center	10	6
Institute of Molecular Biology Ackermannweg 4 55128 Mainz Germany	10	6
Keele University	10	6
King Saud University	10	6
LUMC	10	6
Maladies Infectieuses et Vecteurs: Ecologie Genetique Evolution et Controle	10	6
National Institute of Biological Sciences Beijing	10	6
Rutgers	10	6
Terry Fox Laboratory BC Cancer	10	6
University of Chile	10	6
University of Leeds United Kingdom	10	6
University of Nebraska at Omaha	10	6
University of Toronto Mississauga	10	6
University of Wisconsin - Madison United States	10	6
Washington University School of Medicine St. Louis	10	6
Wildlife Institute of India	10	6
Belfast Health and Social Care Trust	10	5
Benaroya Research Institute	10	5
Children's National Health System	10	5
Epicentre	10	5
ERIBA University of Groningen University Medical Center Groningen The Netherlands	10	5
Howard Hughes Medical Institute Janelia Research Campus	10	5
Institut Curie Paris Sciences et Lettres Research University 75005 Paris France	10	5
Institut de Biologia Evolutiva (CSIC-Universitat Pompeu Fabra)	10	5
Institut Pasteur Montevideo	10	5
Izmir Institute of Technology	10	5
Keio University School of Medicine	10	5
Konkuk University	10	5
Malawi-Liverpool-Wellcome Trust Clinical Research Programme Blantyre Malawi	10	5
Max Planck Institute for Marine Microbiology	10	5
Michigan Technological University	10	5
MRC Cancer Unit University of Cambridge Biomedical Campus Cambridge CB2 OXZ UK	10	5
MRC London Institute of Medical Sciences	10	5
National Oceanic and Atmospheric Administration	10	5
North Dakota State University	10	5
Shenyang Agricultural University	10	5
The University of Arizona	10	5
Universidad Autónoma de Madrid	10	5
University of California Irvine United States	10	5
University of Rome	10	5
University of Toledo	10	5
VIB-Ghent University	10	5
Victoria University of Wellington	10	5
Virginia Tech Carilion Research Institute	10	5
Biomedical Research Institute	10	4
CEITEC	10	4
Centro de Biotecnologia y Genomica de Plantas (UPM-INIA)	10	4
Centro de Pesquisas Rene Rachou	10	4
Chi Mei Medical Center	10	4
Chinese Academy of Agricultural Sciences China	10	4
Department of Biology New York University New York NY 10003	10	4
Department of Biophysics College of Basic Medical Sciences Second Military Medical University	10	4
Department of Dermatology Medical University of Vienna	10	4
Department of Neurophysiology Donders Institute Radboud University	10	4
Guangxi University	10	4
IBM Research	10	4
IGS UMR7256 Aix-Marseille University CNRS	10	4
Institute of Cancer Sciences University of Glasgow	10	4
Institute of Urban Environment Chinese Academy of Sciences	10	4
Kaohsiung Medical University	10	4
Ludwig Maximilians University Munich	10	4
NIEHS	10	4
Olivia Newton-John Cancer Research Institute	10	4
Plant and Food Research	10	4
Polytechnique Montreal	10	4
Radboud Universiteit	10	4
Remin Hospital of Wuhan University China	10	4
Research Institute of Molecular Pathology	10	4
Spanish National Cancer Research Center - CNIO	10	4
UCA & CNRS	10	4
University of Oviedo	10	4
UT-Austin	10	4
UT Knoxville	10	4
Villanova University	10	4
Ann Romney Center for Neurologic Diseases Department of Neurology Brigham and Women's Hospital	10	3
Beijing Academy of Agriculture & Forestry Sciences	10	3
Department of Biology University of Padova Via Ugo Bassi 58/b 35131 Padova Italy	10	3
Department of Biotechnology Africa City of Technology- Khartoum Sudan	10	3
Department of Kinesiology Faculty of Medicine Universite Laval Quebec Canada	10	3
Institut D'Investigacions Biomediques August Pi i Sunyer	10	3
Leibniz Institute on Aging Fritz Lipmann Institute (FLI)	10	3
Lexogen GmbH	10	3
Life and Health Sciences Research Institute (ICVS) School of Medicine University of Minho Campus	10	3
METU	10	3
MilliporeSigma	10	3
Oak Clinic	10	3
Universidad Andres Bello	10	3
Universidad de Salamanca	10	3
Universität Regensburg	10	3
University Hospital Southampton	10	3
University of Kashmir	10	3
University of Malaga	10	3
U.S. Army Medical Research Institute of Infectious Diseases	10	3
Wesleyan University	10	3
WT-MRC Institute of Metabolic Science	10	3
Cedars-Sinai Heart Institute	10	2
CNR	10	2
CNRS université Rennes	10	2
College of Life Sciences Hunan Normal University China	10	2
Department of Neurology Critical Care Columbia University New York USA	10	2
Florida Department of Health	10	2
Hebrew University Medical School	10	2
IBMB-CSIC	10	2
IMEC	10	2
Institute for Integrative Biology of the Cell (I2BC) CEA CNRS	10	2
Institute of Zoonoses Jilin University Changchun Jilin 130062 China	10	2
Instituto de Biofisica Carlos Chagas Filho Universidade Federal do Rio de Janeiro	10	2
Livestock Improvement Corporation (LIC)	10	2
Loma Linda University Medical Center	10	2
Massachusetts Eye and Ear - Harvard Medical School	10	2
Medical Center University of Freiburg	10	2
Merrimack Pharmaceuticals	10	2
NCATS Chemical Genomics Center National Center for Advancing Translational Sciences NIH	10	2
Nestle Institute of Health Sciences	10	2
Neuroscience Center University of Helsinki Finland	10	2
[truncated: 38,776 more rows]
