# Supplementary material for: Tracking the popularity and outcomes of all bioRxiv preprints
Source: eLife journal article supplement (doi:10.7554/elife.45133), 2019-04-24
Supplement: supp [file elife-45133-supp-v1.zip › elife_poa_e45133_Figure_2_figure_supplement_1_source_data_1.csv]

id	posted	collection	monthnum	downloads
419	2017	microbiology	1	36
419	2017	microbiology	2	21
419	2017	microbiology	3	26
419	2017	microbiology	4	90
419	2017	microbiology	5	73
419	2017	microbiology	6	4
419	2017	microbiology	7	8
419	2017	microbiology	8	5
419	2017	microbiology	9	9
419	2017	microbiology	10	10
419	2017	microbiology	11	9
419	2017	microbiology	12	4
429	2017	microbiology	1	7
429	2017	microbiology	2	32
429	2017	microbiology	3	10
429	2017	microbiology	4	5
429	2017	microbiology	5	30
429	2017	microbiology	6	10
429	2017	microbiology	7	10
429	2017	microbiology	8	4
429	2017	microbiology	9	4
429	2017	microbiology	10	30
429	2017	microbiology	11	28
429	2017	microbiology	12	9
479	2017	microbiology	1	167
479	2017	microbiology	2	42
479	2017	microbiology	3	40
479	2017	microbiology	4	38
479	2017	microbiology	5	44
479	2017	microbiology	6	41
479	2017	microbiology	7	20
479	2017	microbiology	8	15
479	2017	microbiology	9	22
479	2017	microbiology	10	24
479	2017	microbiology	11	24
479	2017	microbiology	12	17
540	2017	microbiology	1	49
540	2017	microbiology	2	24
540	2017	microbiology	3	18
540	2017	microbiology	4	14
540	2017	microbiology	5	8
540	2017	microbiology	6	28
540	2017	microbiology	7	34
540	2017	microbiology	8	18
540	2017	microbiology	9	77
540	2017	microbiology	10	29
540	2017	microbiology	11	29
540	2017	microbiology	12	32
541	2017	microbiology	1	49
541	2017	microbiology	2	15
541	2017	microbiology	3	17
541	2017	microbiology	4	5
541	2017	microbiology	5	5
541	2017	microbiology	6	14
541	2017	microbiology	7	17
541	2017	microbiology	8	10
541	2017	microbiology	9	9
541	2017	microbiology	10	17
541	2017	microbiology	11	13
541	2017	microbiology	12	11
557	2017	microbiology	1	8
557	2017	microbiology	2	27
557	2017	microbiology	3	11
557	2017	microbiology	4	9
557	2017	microbiology	5	14
557	2017	microbiology	6	10
557	2017	microbiology	7	15
557	2017	microbiology	8	17
557	2017	microbiology	9	12
557	2017	microbiology	10	21
557	2017	microbiology	11	12
557	2017	microbiology	12	10
562	2017	microbiology	1	52
562	2017	microbiology	2	35
562	2017	microbiology	3	25
562	2017	microbiology	4	28
562	2017	microbiology	5	5
562	2017	microbiology	6	11
562	2017	microbiology	7	9
562	2017	microbiology	8	26
562	2017	microbiology	9	8
562	2017	microbiology	10	14
562	2017	microbiology	11	28
562	2017	microbiology	12	23
564	2017	microbiology	1	44
564	2017	microbiology	2	35
564	2017	microbiology	3	25
564	2017	microbiology	4	59
564	2017	microbiology	5	26
564	2017	microbiology	6	38
564	2017	microbiology	7	38
564	2017	microbiology	8	51
564	2017	microbiology	9	67
564	2017	microbiology	10	73
564	2017	microbiology	11	75
564	2017	microbiology	12	84
591	2017	microbiology	1	55
591	2017	microbiology	2	13
591	2017	microbiology	3	18
591	2017	microbiology	4	10
591	2017	microbiology	5	5
591	2017	microbiology	6	15
591	2017	microbiology	7	7
591	2017	microbiology	8	7
591	2017	microbiology	9	3
591	2017	microbiology	10	2
591	2017	microbiology	11	11
591	2017	microbiology	12	23
668	2017	microbiology	1	26
668	2017	microbiology	2	193
668	2017	microbiology	3	40
668	2017	microbiology	4	33
668	2017	microbiology	5	16
668	2017	microbiology	6	26
668	2017	microbiology	7	18
668	2017	microbiology	8	18
668	2017	microbiology	9	17
668	2017	microbiology	10	13
668	2017	microbiology	11	5
668	2017	microbiology	12	7
677	2017	microbiology	1	40
677	2017	microbiology	2	29
677	2017	microbiology	3	21
677	2017	microbiology	4	2
677	2017	microbiology	5	14
677	2017	microbiology	6	22
677	2017	microbiology	7	4
677	2017	microbiology	8	8
677	2017	microbiology	9	9
677	2017	microbiology	10	6
677	2017	microbiology	11	5
677	2017	microbiology	12	10
693	2017	microbiology	1	264
693	2017	microbiology	2	58
693	2017	microbiology	3	31
693	2017	microbiology	4	27
693	2017	microbiology	5	12
693	2017	microbiology	6	14
693	2017	microbiology	7	55
693	2017	microbiology	8	73
693	2017	microbiology	9	27
693	2017	microbiology	10	24
693	2017	microbiology	11	28
693	2017	microbiology	12	49
745	2017	microbiology	1	136
745	2017	microbiology	2	47
745	2017	microbiology	3	63
745	2017	microbiology	4	29
745	2017	microbiology	5	16
745	2017	microbiology	6	29
745	2017	microbiology	7	60
745	2017	microbiology	8	22
745	2017	microbiology	9	33
745	2017	microbiology	10	15
745	2017	microbiology	11	21
745	2017	microbiology	12	14
775	2017	microbiology	1	7
775	2017	microbiology	2	45
775	2017	microbiology	3	14
775	2017	microbiology	4	8
775	2017	microbiology	5	4
775	2017	microbiology	6	4
775	2017	microbiology	7	7
775	2017	microbiology	8	5
775	2017	microbiology	9	17
775	2017	microbiology	10	9
775	2017	microbiology	11	7
775	2017	microbiology	12	7
804	2017	microbiology	1	305
804	2017	microbiology	2	104
804	2017	microbiology	3	68
804	2017	microbiology	4	75
804	2017	microbiology	5	63
804	2017	microbiology	6	30
804	2017	microbiology	7	102
804	2017	microbiology	8	45
804	2017	microbiology	9	47
804	2017	microbiology	10	50
804	2017	microbiology	11	53
804	2017	microbiology	12	44
811	2017	microbiology	1	31
811	2017	microbiology	2	11
811	2017	microbiology	3	5
811	2017	microbiology	4	4
811	2017	microbiology	5	20
811	2017	microbiology	6	13
811	2017	microbiology	7	11
811	2017	microbiology	8	7
811	2017	microbiology	9	16
811	2017	microbiology	10	10
811	2017	microbiology	11	2
811	2017	microbiology	12	3
864	2016	microbiology	1	155
864	2016	microbiology	2	169
864	2016	microbiology	3	90
864	2016	microbiology	4	65
864	2016	microbiology	5	42
864	2016	microbiology	6	31
864	2016	microbiology	7	56
864	2016	microbiology	8	49
864	2016	microbiology	9	42
864	2016	microbiology	10	44
864	2016	microbiology	11	47
864	2016	microbiology	12	23
944	2017	microbiology	1	391
944	2017	microbiology	2	61
944	2017	microbiology	3	20
944	2017	microbiology	4	10
944	2017	microbiology	5	40
944	2017	microbiology	6	47
944	2017	microbiology	7	18
944	2017	microbiology	8	27
944	2017	microbiology	9	17
944	2017	microbiology	10	14
944	2017	microbiology	11	13
944	2017	microbiology	12	19
986	2017	microbiology	1	49
986	2017	microbiology	2	31
986	2017	microbiology	3	15
986	2017	microbiology	4	24
986	2017	microbiology	5	38
986	2017	microbiology	6	21
986	2017	microbiology	7	20
986	2017	microbiology	8	9
986	2017	microbiology	9	18
986	2017	microbiology	10	14
986	2017	microbiology	11	22
986	2017	microbiology	12	9
993	2017	microbiology	1	26
993	2017	microbiology	2	42
993	2017	microbiology	3	28
993	2017	microbiology	4	23
993	2017	microbiology	5	108
993	2017	microbiology	6	30
993	2017	microbiology	7	20
993	2017	microbiology	8	103
993	2017	microbiology	9	44
993	2017	microbiology	10	36
993	2017	microbiology	11	24
993	2017	microbiology	12	21
1052	2017	microbiology	1	205
1052	2017	microbiology	2	67
1052	2017	microbiology	3	54
1052	2017	microbiology	4	16
1052	2017	microbiology	5	18
1052	2017	microbiology	6	28
1052	2017	microbiology	7	26
1052	2017	microbiology	8	18
1052	2017	microbiology	9	17
1052	2017	microbiology	10	21
1052	2017	microbiology	11	11
1052	2017	microbiology	12	63
1064	2016	microbiology	1	184
1064	2016	microbiology	2	85
1064	2016	microbiology	3	48
1064	2016	microbiology	4	115
1064	2016	microbiology	5	61
1064	2016	microbiology	6	19
1064	2016	microbiology	7	26
1064	2016	microbiology	8	9
1064	2016	microbiology	9	18
1064	2016	microbiology	10	14
1064	2016	microbiology	11	45
1064	2016	microbiology	12	37
1089	2017	microbiology	1	126
1089	2017	microbiology	2	114
1089	2017	microbiology	3	40
1089	2017	microbiology	4	25
1089	2017	microbiology	5	29
1089	2017	microbiology	6	47
1089	2017	microbiology	7	49
1089	2017	microbiology	8	26
1089	2017	microbiology	9	41
1089	2017	microbiology	10	32
1089	2017	microbiology	11	20
1089	2017	microbiology	12	43
1092	2016	microbiology	1	640
1092	2016	microbiology	2	162
1092	2016	microbiology	3	120
1092	2016	microbiology	4	94
1092	2016	microbiology	5	100
1092	2016	microbiology	6	112
1092	2016	microbiology	7	91
1092	2016	microbiology	8	115
1092	2016	microbiology	9	81
1092	2016	microbiology	10	87
1092	2016	microbiology	11	49
1092	2016	microbiology	12	69
1093	2017	microbiology	1	69
1093	2017	microbiology	2	24
1093	2017	microbiology	3	5
1093	2017	microbiology	4	22
1093	2017	microbiology	5	13
1093	2017	microbiology	6	18
1093	2017	microbiology	7	16
1093	2017	microbiology	8	12
1093	2017	microbiology	9	3
1093	2017	microbiology	10	11
1093	2017	microbiology	11	8
1093	2017	microbiology	12	10
1113	2017	microbiology	1	54
1113	2017	microbiology	2	36
1113	2017	microbiology	3	24
1113	2017	microbiology	4	11
1113	2017	microbiology	5	15
1113	2017	microbiology	6	9
1113	2017	microbiology	7	17
1113	2017	microbiology	8	17
1113	2017	microbiology	9	13
1113	2017	microbiology	10	20
1113	2017	microbiology	11	31
1113	2017	microbiology	12	24
1137	2017	microbiology	1	76
1137	2017	microbiology	2	67
1137	2017	microbiology	3	32
1137	2017	microbiology	4	18
1137	2017	microbiology	5	14
1137	2017	microbiology	6	9
1137	2017	microbiology	7	18
1137	2017	microbiology	8	30
1137	2017	microbiology	9	73
1137	2017	microbiology	10	15
1137	2017	microbiology	11	9
1137	2017	microbiology	12	17
1155	2017	microbiology	1	97
1155	2017	microbiology	2	16
1155	2017	microbiology	3	13
1155	2017	microbiology	4	33
1155	2017	microbiology	5	8
1155	2017	microbiology	6	19
1155	2017	microbiology	7	24
1155	2017	microbiology	8	17
1155	2017	microbiology	9	3
1155	2017	microbiology	10	11
1155	2017	microbiology	11	14
1155	2017	microbiology	12	19
1160	2017	microbiology	1	67
1160	2017	microbiology	2	55
1160	2017	microbiology	3	38
1160	2017	microbiology	4	26
1160	2017	microbiology	5	7
1160	2017	microbiology	6	6
1160	2017	microbiology	7	7
1160	2017	microbiology	8	35
1160	2017	microbiology	9	37
1160	2017	microbiology	10	30
1160	2017	microbiology	11	13
1160	2017	microbiology	12	15
1194	2017	microbiology	1	167
1194	2017	microbiology	2	52
1194	2017	microbiology	3	47
1194	2017	microbiology	4	48
1194	2017	microbiology	5	50
1194	2017	microbiology	6	65
1194	2017	microbiology	7	25
1194	2017	microbiology	8	33
1194	2017	microbiology	9	20
1194	2017	microbiology	10	22
1194	2017	microbiology	11	41
1194	2017	microbiology	12	40
1209	2017	microbiology	1	54
1209	2017	microbiology	2	27
1209	2017	microbiology	3	16
1209	2017	microbiology	4	6
1209	2017	microbiology	5	17
1209	2017	microbiology	6	37
1209	2017	microbiology	7	46
1209	2017	microbiology	8	36
1209	2017	microbiology	9	33
1209	2017	microbiology	10	20
1209	2017	microbiology	11	15
1209	2017	microbiology	12	22
1219	2017	microbiology	1	72
1219	2017	microbiology	2	277
1219	2017	microbiology	3	101
1219	2017	microbiology	4	74
1219	2017	microbiology	5	48
1219	2017	microbiology	6	37
1219	2017	microbiology	7	65
1219	2017	microbiology	8	24
1219	2017	microbiology	9	39
1219	2017	microbiology	10	35
1219	2017	microbiology	11	53
1219	2017	microbiology	12	24
1223	2017	microbiology	1	131
1223	2017	microbiology	2	8
1223	2017	microbiology	3	9
1223	2017	microbiology	4	15
1223	2017	microbiology	5	11
1223	2017	microbiology	6	54
1223	2017	microbiology	7	16
1223	2017	microbiology	8	12
1223	2017	microbiology	9	14
1223	2017	microbiology	10	13
1223	2017	microbiology	11	6
1223	2017	microbiology	12	19
1235	2017	microbiology	1	60
1235	2017	microbiology	2	20
1235	2017	microbiology	3	16
1235	2017	microbiology	4	17
1235	2017	microbiology	5	65
1235	2017	microbiology	6	76
1235	2017	microbiology	7	49
1235	2017	microbiology	8	53
1235	2017	microbiology	9	26
1235	2017	microbiology	10	32
1235	2017	microbiology	11	21
1235	2017	microbiology	12	14
1236	2017	microbiology	1	84
1236	2017	microbiology	2	17
1236	2017	microbiology	3	22
1236	2017	microbiology	4	12
1236	2017	microbiology	5	2
1236	2017	microbiology	6	3
1236	2017	microbiology	7	6
1236	2017	microbiology	8	17
1236	2017	microbiology	9	21
1236	2017	microbiology	10	18
1236	2017	microbiology	11	21
1236	2017	microbiology	12	6
1237	2017	microbiology	1	212
1237	2017	microbiology	2	182
1237	2017	microbiology	3	75
1237	2017	microbiology	4	72
1237	2017	microbiology	5	33
1237	2017	microbiology	6	81
1237	2017	microbiology	7	57
1237	2017	microbiology	8	55
1237	2017	microbiology	9	54
1237	2017	microbiology	10	53
1237	2017	microbiology	11	38
1237	2017	microbiology	12	47
1254	2017	microbiology	1	82
1254	2017	microbiology	2	37
1254	2017	microbiology	3	16
1254	2017	microbiology	4	8
1254	2017	microbiology	5	11
1254	2017	microbiology	6	64
1254	2017	microbiology	7	29
1254	2017	microbiology	8	10
1254	2017	microbiology	9	7
1254	2017	microbiology	10	16
1254	2017	microbiology	11	13
1254	2017	microbiology	12	16
1255	2017	microbiology	1	56
1255	2017	microbiology	2	33
1255	2017	microbiology	3	18
1255	2017	microbiology	4	37
1255	2017	microbiology	5	18
1255	2017	microbiology	6	8
1255	2017	microbiology	7	9
1255	2017	microbiology	8	34
1255	2017	microbiology	9	16
1255	2017	microbiology	10	2
1255	2017	microbiology	11	4
1255	2017	microbiology	12	10
1256	2017	microbiology	1	53
1256	2017	microbiology	2	11
1256	2017	microbiology	3	13
1256	2017	microbiology	4	19
1256	2017	microbiology	5	15
1256	2017	microbiology	6	15
1256	2017	microbiology	7	8
1256	2017	microbiology	8	6
1256	2017	microbiology	9	10
1256	2017	microbiology	10	19
1256	2017	microbiology	11	11
1256	2017	microbiology	12	5
1259	2017	microbiology	1	107
1259	2017	microbiology	2	72
1259	2017	microbiology	3	21
1259	2017	microbiology	4	29
1259	2017	microbiology	5	59
1259	2017	microbiology	6	43
1259	2017	microbiology	7	29
1259	2017	microbiology	8	14
1259	2017	microbiology	9	16
1259	2017	microbiology	10	22
1259	2017	microbiology	11	13
1259	2017	microbiology	12	17
1266	2017	microbiology	1	107
1266	2017	microbiology	2	33
1266	2017	microbiology	3	21
1266	2017	microbiology	4	44
1266	2017	microbiology	5	80
1266	2017	microbiology	6	20
1266	2017	microbiology	7	15
1266	2017	microbiology	8	21
1266	2017	microbiology	9	11
1266	2017	microbiology	10	24
1266	2017	microbiology	11	24
1266	2017	microbiology	12	21
1267	2017	microbiology	1	114
1267	2017	microbiology	2	44
1267	2017	microbiology	3	26
1267	2017	microbiology	4	34
1267	2017	microbiology	5	59
1267	2017	microbiology	6	91
1267	2017	microbiology	7	60
1267	2017	microbiology	8	34
1267	2017	microbiology	9	17
1267	2017	microbiology	10	9
1267	2017	microbiology	11	14
1267	2017	microbiology	12	14
1268	2017	microbiology	1	115
1268	2017	microbiology	2	23
1268	2017	microbiology	3	63
1268	2017	microbiology	4	60
1268	2017	microbiology	5	72
1268	2017	microbiology	6	37
1268	2017	microbiology	7	15
1268	2017	microbiology	8	11
1268	2017	microbiology	9	17
1268	2017	microbiology	10	15
1268	2017	microbiology	11	10
1268	2017	microbiology	12	15
1273	2017	microbiology	1	69
1273	2017	microbiology	2	22
1273	2017	microbiology	3	8
1273	2017	microbiology	4	14
1273	2017	microbiology	5	88
1273	2017	microbiology	6	47
1273	2017	microbiology	7	32
1273	2017	microbiology	8	49
1273	2017	microbiology	9	21
1273	2017	microbiology	10	18
1273	2017	microbiology	11	20
1273	2017	microbiology	12	29
1275	2017	microbiology	1	162
1275	2017	microbiology	2	87
1275	2017	microbiology	3	28
1275	2017	microbiology	4	41
1275	2017	microbiology	5	31
1275	2017	microbiology	6	75
1275	2017	microbiology	7	76
1275	2017	microbiology	8	26
1275	2017	microbiology	9	10
1275	2017	microbiology	10	14
1275	2017	microbiology	11	21
1275	2017	microbiology	12	14
1279	2017	microbiology	1	62
1279	2017	microbiology	2	37
1279	2017	microbiology	3	45
1279	2017	microbiology	4	3
1279	2017	microbiology	5	14
1279	2017	microbiology	6	18
1279	2017	microbiology	7	75
1279	2017	microbiology	8	70
1279	2017	microbiology	9	19
1279	2017	microbiology	10	12
1279	2017	microbiology	11	11
1279	2017	microbiology	12	9
1295	2017	microbiology	1	77
1295	2017	microbiology	2	38
1295	2017	microbiology	3	33
1295	2017	microbiology	4	20
1295	2017	microbiology	5	9
1295	2017	microbiology	6	11
1295	2017	microbiology	7	7
1295	2017	microbiology	8	88
1295	2017	microbiology	9	40
1295	2017	microbiology	10	22
1295	2017	microbiology	11	11
1295	2017	microbiology	12	14
1300	2017	microbiology	1	110
1300	2017	microbiology	2	36
1300	2017	microbiology	3	18
1300	2017	microbiology	4	12
1300	2017	microbiology	5	11
1300	2017	microbiology	6	6
1300	2017	microbiology	7	10
1300	2017	microbiology	8	7
1300	2017	microbiology	9	32
1300	2017	microbiology	10	20
1300	2017	microbiology	11	15
1300	2017	microbiology	12	8
1302	2017	microbiology	1	12
1302	2017	microbiology	2	43
1302	2017	microbiology	3	32
1302	2017	microbiology	4	15
1302	2017	microbiology	5	16
1302	2017	microbiology	6	21
1302	2017	microbiology	7	6
1302	2017	microbiology	8	9
1302	2017	microbiology	9	39
1302	2017	microbiology	10	17
1302	2017	microbiology	11	65
1302	2017	microbiology	12	18
1305	2017	microbiology	1	115
1305	2017	microbiology	2	34
1305	2017	microbiology	3	22
1305	2017	microbiology	4	23
1305	2017	microbiology	5	39
1305	2017	microbiology	6	20
1305	2017	microbiology	7	55
1305	2017	microbiology	8	18
1305	2017	microbiology	9	9
1305	2017	microbiology	10	16
1305	2017	microbiology	11	21
1305	2017	microbiology	12	10
1306	2017	microbiology	1	43
1306	2017	microbiology	2	24
1306	2017	microbiology	3	12
1306	2017	microbiology	4	10
1306	2017	microbiology	5	10
1306	2017	microbiology	6	2
1306	2017	microbiology	7	4
1306	2017	microbiology	8	11
1306	2017	microbiology	9	42
1306	2017	microbiology	10	21
1306	2017	microbiology	11	6
1306	2017	microbiology	12	6
1308	2017	microbiology	1	134
1308	2017	microbiology	2	71
1308	2017	microbiology	3	22
1308	2017	microbiology	4	106
1308	2017	microbiology	5	127
1308	2017	microbiology	6	42
1308	2017	microbiology	7	42
1308	2017	microbiology	8	18
1308	2017	microbiology	9	19
1308	2017	microbiology	10	19
1308	2017	microbiology	11	29
1308	2017	microbiology	12	14
1312	2017	microbiology	1	173
1312	2017	microbiology	2	86
1312	2017	microbiology	3	78
1312	2017	microbiology	4	59
1312	2017	microbiology	5	69
1312	2017	microbiology	6	131
1312	2017	microbiology	7	32
1312	2017	microbiology	8	28
1312	2017	microbiology	9	47
1312	2017	microbiology	10	41
1312	2017	microbiology	11	48
1312	2017	microbiology	12	26
1323	2017	microbiology	1	15
1323	2017	microbiology	2	207
1323	2017	microbiology	3	54
1323	2017	microbiology	4	50
1323	2017	microbiology	5	130
1323	2017	microbiology	6	56
1323	2017	microbiology	7	39
1323	2017	microbiology	8	22
1323	2017	microbiology	9	112
1323	2017	microbiology	10	49
1323	2017	microbiology	11	78
1323	2017	microbiology	12	50
1333	2017	microbiology	1	135
1333	2017	microbiology	2	71
1333	2017	microbiology	3	14
1333	2017	microbiology	4	40
1333	2017	microbiology	5	20
1333	2017	microbiology	6	8
1333	2017	microbiology	7	13
1333	2017	microbiology	8	17
1333	2017	microbiology	9	7
1333	2017	microbiology	10	8
1333	2017	microbiology	11	13
1333	2017	microbiology	12	9
1338	2017	microbiology	1	178
1338	2017	microbiology	2	60
1338	2017	microbiology	3	15
1338	2017	microbiology	4	28
1338	2017	microbiology	5	62
1338	2017	microbiology	6	12
1338	2017	microbiology	7	9
1338	2017	microbiology	8	8
1338	2017	microbiology	9	7
1338	2017	microbiology	10	19
1338	2017	microbiology	11	8
1338	2017	microbiology	12	17
1340	2016	microbiology	1	35
1340	2016	microbiology	2	39
1340	2016	microbiology	3	81
1340	2016	microbiology	4	48
1340	2016	microbiology	5	29
1340	2016	microbiology	6	12
1340	2016	microbiology	7	10
1340	2016	microbiology	8	31
1340	2016	microbiology	9	4
1340	2016	microbiology	10	12
1340	2016	microbiology	11	22
1340	2016	microbiology	12	6
1355	2017	microbiology	1	24
1355	2017	microbiology	2	32
1355	2017	microbiology	3	20
1355	2017	microbiology	4	13
1355	2017	microbiology	5	14
1355	2017	microbiology	6	51
1355	2017	microbiology	7	28
1355	2017	microbiology	8	21
1355	2017	microbiology	9	54
1355	2017	microbiology	10	31
1355	2017	microbiology	11	11
1355	2017	microbiology	12	14
1368	2017	microbiology	1	130
1368	2017	microbiology	2	31
1368	2017	microbiology	3	21
1368	2017	microbiology	4	24
1368	2017	microbiology	5	33
1368	2017	microbiology	6	33
1368	2017	microbiology	7	26
1368	2017	microbiology	8	18
1368	2017	microbiology	9	18
1368	2017	microbiology	10	10
1368	2017	microbiology	11	19
1368	2017	microbiology	12	31
1372	2017	microbiology	1	92
1372	2017	microbiology	2	29
1372	2017	microbiology	3	29
1372	2017	microbiology	4	22
1372	2017	microbiology	5	32
1372	2017	microbiology	6	25
1372	2017	microbiology	7	28
1372	2017	microbiology	8	28
1372	2017	microbiology	9	7
1372	2017	microbiology	10	21
1372	2017	microbiology	11	41
1372	2017	microbiology	12	60
1379	2017	microbiology	1	101
1379	2017	microbiology	2	80
1379	2017	microbiology	3	74
1379	2017	microbiology	4	66
1379	2017	microbiology	5	49
1379	2017	microbiology	6	46
1379	2017	microbiology	7	31
1379	2017	microbiology	8	33
1379	2017	microbiology	9	23
1379	2017	microbiology	10	10
1379	2017	microbiology	11	16
1379	2017	microbiology	12	21
1380	2017	microbiology	1	56
1380	2017	microbiology	2	9
1380	2017	microbiology	3	6
1380	2017	microbiology	4	13
1380	2017	microbiology	5	6
1380	2017	microbiology	6	19
1380	2017	microbiology	7	30
1380	2017	microbiology	8	26
1380	2017	microbiology	9	13
1380	2017	microbiology	10	15
1380	2017	microbiology	11	10
1380	2017	microbiology	12	3
1383	2017	microbiology	1	25
1383	2017	microbiology	2	13
1383	2017	microbiology	3	13
1383	2017	microbiology	4	11
1383	2017	microbiology	5	23
1383	2017	microbiology	6	20
1383	2017	microbiology	7	9
1383	2017	microbiology	8	1
1383	2017	microbiology	9	1
1383	2017	microbiology	10	2
1383	2017	microbiology	11	7
1383	2017	microbiology	12	2
1385	2017	microbiology	1	36
1385	2017	microbiology	2	21
1385	2017	microbiology	3	15
1385	2017	microbiology	4	17
1385	2017	microbiology	5	28
1385	2017	microbiology	6	30
1385	2017	microbiology	7	18
1385	2017	microbiology	8	30
1385	2017	microbiology	9	11
1385	2017	microbiology	10	8
1385	2017	microbiology	11	7
1385	2017	microbiology	12	10
1392	2017	microbiology	1	178
1392	2017	microbiology	2	178
1392	2017	microbiology	3	35
1392	2017	microbiology	4	110
1392	2017	microbiology	5	51
1392	2017	microbiology	6	46
1392	2017	microbiology	7	19
1392	2017	microbiology	8	52
1392	2017	microbiology	9	26
1392	2017	microbiology	10	35
1392	2017	microbiology	11	28
1392	2017	microbiology	12	48
1402	2017	microbiology	1	146
1402	2017	microbiology	2	95
1402	2017	microbiology	3	50
1402	2017	microbiology	4	34
1402	2017	microbiology	5	43
1402	2017	microbiology	6	85
1402	2017	microbiology	7	58
1402	2017	microbiology	8	43
1402	2017	microbiology	9	26
1402	2017	microbiology	10	13
1402	2017	microbiology	11	19
1402	2017	microbiology	12	19
1408	2017	microbiology	1	110
1408	2017	microbiology	2	33
1408	2017	microbiology	3	32
1408	2017	microbiology	4	186
1408	2017	microbiology	5	46
1408	2017	microbiology	6	32
1408	2017	microbiology	7	25
1408	2017	microbiology	8	18
1408	2017	microbiology	9	17
1408	2017	microbiology	10	20
1408	2017	microbiology	11	21
1408	2017	microbiology	12	33
1418	2017	microbiology	1	60
1418	2017	microbiology	2	30
1418	2017	microbiology	3	17
1418	2017	microbiology	4	42
1418	2017	microbiology	5	13
1418	2017	microbiology	6	10
1418	2017	microbiology	7	5
1418	2017	microbiology	8	5
1418	2017	microbiology	9	2
1418	2017	microbiology	10	7
1418	2017	microbiology	11	8
1418	2017	microbiology	12	6
1423	2017	microbiology	1	49
1423	2017	microbiology	2	19
1423	2017	microbiology	3	31
1423	2017	microbiology	4	51
1423	2017	microbiology	5	23
1423	2017	microbiology	6	37
1423	2017	microbiology	7	24
1423	2017	microbiology	8	33
1423	2017	microbiology	9	20
1423	2017	microbiology	10	17
1423	2017	microbiology	11	32
1423	2017	microbiology	12	37
1424	2017	microbiology	1	50
1424	2017	microbiology	2	32
1424	2017	microbiology	3	10
1424	2017	microbiology	4	6
1424	2017	microbiology	5	7
1424	2017	microbiology	6	9
1424	2017	microbiology	7	4
1424	2017	microbiology	8	22
1424	2017	microbiology	9	9
1424	2017	microbiology	10	2
1424	2017	microbiology	11	6
1424	2017	microbiology	12	6
1429	2017	microbiology	1	176
1429	2017	microbiology	2	101
1429	2017	microbiology	3	70
1429	2017	microbiology	4	132
1429	2017	microbiology	5	90
1429	2017	microbiology	6	95
1429	2017	microbiology	7	41
1429	2017	microbiology	8	28
1429	2017	microbiology	9	28
1429	2017	microbiology	10	37
1429	2017	microbiology	11	31
1429	2017	microbiology	12	29
1439	2017	microbiology	1	92
1439	2017	microbiology	2	57
1439	2017	microbiology	3	88
1439	2017	microbiology	4	30
1439	2017	microbiology	5	26
1439	2017	microbiology	6	23
1439	2017	microbiology	7	56
1439	2017	microbiology	8	40
1439	2017	microbiology	9	9
1439	2017	microbiology	10	18
1439	2017	microbiology	11	38
1439	2017	microbiology	12	51
1448	2016	microbiology	1	58
1448	2016	microbiology	2	32
1448	2016	microbiology	3	26
1448	2016	microbiology	4	25
1448	2016	microbiology	5	43
1448	2016	microbiology	6	15
1448	2016	microbiology	7	9
1448	2016	microbiology	8	9
1448	2016	microbiology	9	27
1448	2016	microbiology	10	22
1448	2016	microbiology	11	13
1448	2016	microbiology	12	4
1451	2017	microbiology	1	84
1451	2017	microbiology	2	34
1451	2017	microbiology	3	15
1451	2017	microbiology	4	9
1451	2017	microbiology	5	52
1451	2017	microbiology	6	35
1451	2017	microbiology	7	32
1451	2017	microbiology	8	13
1451	2017	microbiology	9	14
1451	2017	microbiology	10	24
1451	2017	microbiology	11	19
1451	2017	microbiology	12	13
1456	2017	microbiology	1	61
1456	2017	microbiology	2	50
1456	2017	microbiology	3	22
1456	2017	microbiology	4	19
1456	2017	microbiology	5	20
1456	2017	microbiology	6	10
1456	2017	microbiology	7	31
1456	2017	microbiology	8	9
1456	2017	microbiology	9	7
1456	2017	microbiology	10	2
1456	2017	microbiology	11	12
1456	2017	microbiology	12	13
1457	2016	microbiology	1	66
1457	2016	microbiology	2	53
1457	2016	microbiology	3	11
1457	2016	microbiology	4	17
1457	2016	microbiology	5	23
1457	2016	microbiology	6	13
1457	2016	microbiology	7	3
1457	2016	microbiology	8	8
1457	2016	microbiology	9	9
1457	2016	microbiology	10	0
1457	2016	microbiology	11	16
1457	2016	microbiology	12	15
1466	2017	microbiology	1	91
1466	2017	microbiology	2	72
1466	2017	microbiology	3	48
1466	2017	microbiology	4	22
1466	2017	microbiology	5	25
1466	2017	microbiology	6	16
1466	2017	microbiology	7	26
1466	2017	microbiology	8	20
1466	2017	microbiology	9	10
1466	2017	microbiology	10	20
1466	2017	microbiology	11	42
1466	2017	microbiology	12	23
1469	2017	microbiology	1	84
1469	2017	microbiology	2	74
1469	2017	microbiology	3	58
1469	2017	microbiology	4	65
1469	2017	microbiology	5	58
1469	2017	microbiology	6	28
1469	2017	microbiology	7	28
1469	2017	microbiology	8	6
1469	2017	microbiology	9	6
1469	2017	microbiology	10	5
1469	2017	microbiology	11	6
1469	2017	microbiology	12	9
1470	2017	microbiology	1	23
1470	2017	microbiology	2	35
1470	2017	microbiology	3	13
1470	2017	microbiology	4	4
1470	2017	microbiology	5	24
1470	2017	microbiology	6	15
1470	2017	microbiology	7	16
1470	2017	microbiology	8	17
1470	2017	microbiology	9	21
1470	2017	microbiology	10	15
1470	2017	microbiology	11	11
1470	2017	microbiology	12	14
1471	2017	microbiology	1	18
1471	2017	microbiology	2	18
1471	2017	microbiology	3	9
1471	2017	microbiology	4	7
1471	2017	microbiology	5	14
1471	2017	microbiology	6	15
1471	2017	microbiology	7	10
1471	2017	microbiology	8	10
1471	2017	microbiology	9	10
1471	2017	microbiology	10	12
1471	2017	microbiology	11	15
1471	2017	microbiology	12	15
1473	2017	microbiology	1	51
1473	2017	microbiology	2	81
1473	2017	microbiology	3	75
1473	2017	microbiology	4	76
1473	2017	microbiology	5	74
1473	2017	microbiology	6	81
1473	2017	microbiology	7	103
1473	2017	microbiology	8	52
1473	2017	microbiology	9	35
1473	2017	microbiology	10	22
1473	2017	microbiology	11	56
1473	2017	microbiology	12	34
1477	2017	microbiology	1	312
1477	2017	microbiology	2	123
1477	2017	microbiology	3	76
1477	2017	microbiology	4	139
1477	2017	microbiology	5	134
1477	2017	microbiology	6	56
1477	2017	microbiology	7	34
1477	2017	microbiology	8	48
1477	2017	microbiology	9	38
1477	2017	microbiology	10	19
1477	2017	microbiology	11	22
1477	2017	microbiology	12	21
1478	2017	microbiology	1	28
1478	2017	microbiology	2	36
1478	2017	microbiology	3	43
1478	2017	microbiology	4	10
1478	2017	microbiology	5	11
1478	2017	microbiology	6	3
1478	2017	microbiology	7	25
1478	2017	microbiology	8	29
1478	2017	microbiology	9	22
1478	2017	microbiology	10	18
1478	2017	microbiology	11	7
1478	2017	microbiology	12	15
1481	2016	microbiology	1	70
1481	2016	microbiology	2	37
1481	2016	microbiology	3	26
1481	2016	microbiology	4	12
1481	2016	microbiology	5	20
1481	2016	microbiology	6	14
1481	2016	microbiology	7	8
1481	2016	microbiology	8	9
1481	2016	microbiology	9	7
1481	2016	microbiology	10	17
1481	2016	microbiology	11	11
1481	2016	microbiology	12	92
1486	2017	microbiology	1	58
1486	2017	microbiology	2	17
1486	2017	microbiology	3	18
1486	2017	microbiology	4	19
1486	2017	microbiology	5	7
1486	2017	microbiology	6	4
1486	2017	microbiology	7	6
1486	2017	microbiology	8	6
1486	2017	microbiology	9	1
1486	2017	microbiology	10	8
1486	2017	microbiology	11	5
1486	2017	microbiology	12	5
1497	2017	microbiology	1	75
1497	2017	microbiology	2	18
1497	2017	microbiology	3	8
1497	2017	microbiology	4	41
1497	2017	microbiology	5	17
1497	2017	microbiology	6	25
1497	2017	microbiology	7	17
1497	2017	microbiology	8	34
1497	2017	microbiology	9	39
1497	2017	microbiology	10	24
1497	2017	microbiology	11	29
1497	2017	microbiology	12	18
1500	2017	microbiology	1	54
1500	2017	microbiology	2	7
1500	2017	microbiology	3	7
1500	2017	microbiology	4	23
1500	2017	microbiology	5	11
1500	2017	microbiology	6	5
1500	2017	microbiology	7	2
1500	2017	microbiology	8	3
1500	2017	microbiology	9	5
1500	2017	microbiology	10	6
1500	2017	microbiology	11	8
1500	2017	microbiology	12	6
1502	2017	microbiology	1	108
1502	2017	microbiology	2	35
1502	2017	microbiology	3	32
1502	2017	microbiology	4	15
1502	2017	microbiology	5	7
1502	2017	microbiology	6	0
1502	2017	microbiology	7	0
1502	2017	microbiology	8	0
1502	2017	microbiology	9	3
1502	2017	microbiology	10	1
1502	2017	microbiology	11	2
1502	2017	microbiology	12	4
1503	2017	microbiology	1	141
1503	2017	microbiology	2	56
1503	2017	microbiology	3	55
1503	2017	microbiology	4	46
1503	2017	microbiology	5	45
1503	2017	microbiology	6	45
1503	2017	microbiology	7	59
1503	2017	microbiology	8	20
1503	2017	microbiology	9	18
1503	2017	microbiology	10	10
1503	2017	microbiology	11	6
1503	2017	microbiology	12	5
1505	2017	microbiology	1	27
1505	2017	microbiology	2	5
1505	2017	microbiology	3	18
1505	2017	microbiology	4	17
1505	2017	microbiology	5	16
1505	2017	microbiology	6	19
1505	2017	microbiology	7	11
1505	2017	microbiology	8	10
1505	2017	microbiology	9	3
1505	2017	microbiology	10	2
1505	2017	microbiology	11	4
1505	2017	microbiology	12	9
1510	2017	microbiology	1	136
1510	2017	microbiology	2	46
1510	2017	microbiology	3	29
1510	2017	microbiology	4	30
1510	2017	microbiology	5	13
1510	2017	microbiology	6	65
1510	2017	microbiology	7	20
1510	2017	microbiology	8	25
1510	2017	microbiology	9	20
1510	2017	microbiology	10	14
1510	2017	microbiology	11	28
1510	2017	microbiology	12	10
1517	2017	microbiology	1	65
1517	2017	microbiology	2	22
1517	2017	microbiology	3	63
1517	2017	microbiology	4	13
1517	2017	microbiology	5	8
1517	2017	microbiology	6	3
1517	2017	microbiology	7	8
1517	2017	microbiology	8	4
1517	2017	microbiology	9	1
1517	2017	microbiology	10	4
1517	2017	microbiology	11	8
1517	2017	microbiology	12	5
1518	2017	microbiology	1	106
1518	2017	microbiology	2	24
1518	2017	microbiology	3	48
1518	2017	microbiology	4	23
1518	2017	microbiology	5	17
1518	2017	microbiology	6	26
1518	2017	microbiology	7	26
1518	2017	microbiology	8	13
1518	2017	microbiology	9	16
1518	2017	microbiology	10	11
1518	2017	microbiology	11	19
1518	2017	microbiology	12	30
1523	2015	microbiology	1	49
1523	2015	microbiology	2	26
1523	2015	microbiology	3	25
1523	2015	microbiology	4	8
1523	2015	microbiology	5	9
1523	2015	microbiology	6	26
1523	2015	microbiology	7	22
1523	2015	microbiology	8	23
1523	2015	microbiology	9	18
1523	2015	microbiology	10	43
1523	2015	microbiology	11	17
1523	2015	microbiology	12	37
1524	2017	microbiology	1	20
1524	2017	microbiology	2	47
1524	2017	microbiology	3	15
1524	2017	microbiology	4	9
1524	2017	microbiology	5	18
1524	2017	microbiology	6	12
1524	2017	microbiology	7	12
1524	2017	microbiology	8	4
1524	2017	microbiology	9	8
1524	2017	microbiology	10	8
1524	2017	microbiology	11	5
1524	2017	microbiology	12	8
1526	2017	microbiology	1	29
1526	2017	microbiology	2	85
1526	2017	microbiology	3	17
1526	2017	microbiology	4	19
1526	2017	microbiology	5	5
1526	2017	microbiology	6	15
1526	2017	microbiology	7	17
1526	2017	microbiology	8	7
1526	2017	microbiology	9	9
1526	2017	microbiology	10	12
1526	2017	microbiology	11	10
1526	2017	microbiology	12	25
1527	2017	microbiology	1	71
1527	2017	microbiology	2	68
1527	2017	microbiology	3	34
1527	2017	microbiology	4	21
1527	2017	microbiology	5	30
1527	2017	microbiology	6	15
1527	2017	microbiology	7	11
1527	2017	microbiology	8	21
1527	2017	microbiology	9	12
1527	2017	microbiology	10	5
1527	2017	microbiology	11	5
1527	2017	microbiology	12	5
1528	2017	microbiology	1	13
1528	2017	microbiology	2	25
1528	2017	microbiology	3	11
1528	2017	microbiology	4	10
1528	2017	microbiology	5	13
1528	2017	microbiology	6	9
1528	2017	microbiology	7	9
1528	2017	microbiology	8	0
1528	2017	microbiology	9	9
1528	2017	microbiology	10	13
1528	2017	microbiology	11	6
1528	2017	microbiology	12	7
1529	2017	microbiology	1	86
1529	2017	microbiology	2	67
1529	2017	microbiology	3	39
1529	2017	microbiology	4	58
1529	2017	microbiology	5	19
1529	2017	microbiology	6	24
1529	2017	microbiology	7	33
1529	2017	microbiology	8	26
1529	2017	microbiology	9	15
1529	2017	microbiology	10	2
1529	2017	microbiology	11	3
1529	2017	microbiology	12	5
1530	2017	microbiology	1	48
1530	2017	microbiology	2	25
1530	2017	microbiology	3	7
1530	2017	microbiology	4	14
1530	2017	microbiology	5	1
1530	2017	microbiology	6	12
1530	2017	microbiology	7	5
1530	2017	microbiology	8	5
1530	2017	microbiology	9	6
1530	2017	microbiology	10	12
1530	2017	microbiology	11	6
1530	2017	microbiology	12	13
1531	2017	microbiology	1	25
1531	2017	microbiology	2	15
1531	2017	microbiology	3	11
1531	2017	microbiology	4	6
1531	2017	microbiology	5	7
1531	2017	microbiology	6	2
1531	2017	microbiology	7	11
1531	2017	microbiology	8	2
1531	2017	microbiology	9	5
1531	2017	microbiology	10	6
1531	2017	microbiology	11	6
1531	2017	microbiology	12	4
1532	2016	microbiology	1	152
1532	2016	microbiology	2	44
1532	2016	microbiology	3	27
1532	2016	microbiology	4	35
1532	2016	microbiology	5	31
1532	2016	microbiology	6	12
1532	2016	microbiology	7	12
1532	2016	microbiology	8	71
1532	2016	microbiology	9	44
1532	2016	microbiology	10	42
1532	2016	microbiology	11	26
1532	2016	microbiology	12	37
1533	2017	microbiology	1	163
1533	2017	microbiology	2	67
1533	2017	microbiology	3	35
1533	2017	microbiology	4	31
1533	2017	microbiology	5	13
1533	2017	microbiology	6	8
1533	2017	microbiology	7	20
1533	2017	microbiology	8	8
1533	2017	microbiology	9	19
1533	2017	microbiology	10	14
1533	2017	microbiology	11	14
1533	2017	microbiology	12	10
1534	2017	microbiology	1	37
1534	2017	microbiology	2	15
1534	2017	microbiology	3	14
1534	2017	microbiology	4	4
1534	2017	microbiology	5	8
1534	2017	microbiology	6	21
1534	2017	microbiology	7	22
1534	2017	microbiology	8	7
1534	2017	microbiology	9	3
1534	2017	microbiology	10	4
1534	2017	microbiology	11	8
1534	2017	microbiology	12	9
1535	2017	microbiology	1	459
1535	2017	microbiology	2	253
1535	2017	microbiology	3	87
1535	2017	microbiology	4	27
1535	2017	microbiology	5	25
1535	2017	microbiology	6	26
1535	2017	microbiology	7	8
1535	2017	microbiology	8	10
1535	2017	microbiology	9	14
1535	2017	microbiology	10	17
1535	2017	microbiology	11	24
1535	2017	microbiology	12	11
1536	2017	microbiology	1	19
1536	2017	microbiology	2	17
1536	2017	microbiology	3	16
1536	2017	microbiology	4	11
1536	2017	microbiology	5	9
1536	2017	microbiology	6	31
1536	2017	microbiology	7	21
1536	2017	microbiology	8	16
1536	2017	microbiology	9	8
1536	2017	microbiology	10	12
1536	2017	microbiology	11	10
1536	2017	microbiology	12	7
1537	2017	microbiology	1	338
1537	2017	microbiology	2	268
1537	2017	microbiology	3	108
1537	2017	microbiology	4	142
1537	2017	microbiology	5	143
1537	2017	microbiology	6	137
1537	2017	microbiology	7	81
1537	2017	microbiology	8	103
1537	2017	microbiology	9	59
1537	2017	microbiology	10	75
1537	2017	microbiology	11	123
1537	2017	microbiology	12	119
1538	2017	microbiology	1	19
1538	2017	microbiology	2	27
1538	2017	microbiology	3	19
1538	2017	microbiology	4	29
1538	2017	microbiology	5	16
1538	2017	microbiology	6	20
1538	2017	microbiology	7	13
1538	2017	microbiology	8	4
1538	2017	microbiology	9	2
1538	2017	microbiology	10	14
1538	2017	microbiology	11	7
1538	2017	microbiology	12	6
1539	2017	microbiology	1	17
1539	2017	microbiology	2	25
1539	2017	microbiology	3	10
1539	2017	microbiology	4	7
1539	2017	microbiology	5	13
1539	2017	microbiology	6	20
1539	2017	microbiology	7	7
1539	2017	microbiology	8	2
1539	2017	microbiology	9	2
1539	2017	microbiology	10	5
1539	2017	microbiology	11	7
1539	2017	microbiology	12	7
1540	2017	microbiology	1	62
1540	2017	microbiology	2	44
1540	2017	microbiology	3	24
1540	2017	microbiology	4	23
1540	2017	microbiology	5	15
1540	2017	microbiology	6	5
1540	2017	microbiology	7	14
1540	2017	microbiology	8	6
1540	2017	microbiology	9	4
1540	2017	microbiology	10	10
1540	2017	microbiology	11	9
1540	2017	microbiology	12	15
1541	2017	microbiology	1	142
1541	2017	microbiology	2	40
1541	2017	microbiology	3	66
1541	2017	microbiology	4	93
1541	2017	microbiology	5	26
1541	2017	microbiology	6	24
1541	2017	microbiology	7	15
1541	2017	microbiology	8	22
1541	2017	microbiology	9	11
1541	2017	microbiology	10	7
1541	2017	microbiology	11	7
1541	2017	microbiology	12	5
1542	2017	microbiology	1	43
1542	2017	microbiology	2	157
1542	2017	microbiology	3	68
1542	2017	microbiology	4	50
1542	2017	microbiology	5	35
1542	2017	microbiology	6	13
1542	2017	microbiology	7	8
1542	2017	microbiology	8	11
1542	2017	microbiology	9	14
1542	2017	microbiology	10	11
1542	2017	microbiology	11	13
1542	2017	microbiology	12	13
1543	2017	microbiology	1	32
1543	2017	microbiology	2	26
1543	2017	microbiology	3	13
1543	2017	microbiology	4	5
1543	2017	microbiology	5	1
1543	2017	microbiology	6	12
1543	2017	microbiology	7	6
1543	2017	microbiology	8	6
1543	2017	microbiology	9	9
1543	2017	microbiology	10	11
1543	2017	microbiology	11	7
1543	2017	microbiology	12	6
1544	2017	microbiology	1	97
1544	2017	microbiology	2	42
1544	2017	microbiology	3	26
1544	2017	microbiology	4	20
1544	2017	microbiology	5	23
1544	2017	microbiology	6	23
1544	2017	microbiology	7	35
1544	2017	microbiology	8	34
1544	2017	microbiology	9	24
1544	2017	microbiology	10	17
1544	2017	microbiology	11	27
1544	2017	microbiology	12	26
1545	2017	microbiology	1	22
1545	2017	microbiology	2	25
1545	2017	microbiology	3	10
1545	2017	microbiology	4	38
1545	2017	microbiology	5	48
1545	2017	microbiology	6	10
1545	2017	microbiology	7	16
1545	2017	microbiology	8	9
1545	2017	microbiology	9	7
1545	2017	microbiology	10	9
1545	2017	microbiology	11	13
1545	2017	microbiology	12	17
1546	2017	microbiology	1	26
1546	2017	microbiology	2	15
1546	2017	microbiology	3	5
1546	2017	microbiology	4	5
1546	2017	microbiology	5	3
1546	2017	microbiology	6	6
1546	2017	microbiology	7	5
1546	2017	microbiology	8	4
1546	2017	microbiology	9	2
1546	2017	microbiology	10	9
1546	2017	microbiology	11	11
1546	2017	microbiology	12	5
1547	2017	microbiology	1	101
1547	2017	microbiology	2	22
1547	2017	microbiology	3	23
1547	2017	microbiology	4	11
1547	2017	microbiology	5	10
1547	2017	microbiology	6	11
1547	2017	microbiology	7	13
1547	2017	microbiology	8	18
1547	2017	microbiology	9	7
1547	2017	microbiology	10	11
1547	2017	microbiology	11	15
1547	2017	microbiology	12	11
1548	2017	microbiology	1	129
1548	2017	microbiology	2	53
1548	2017	microbiology	3	37
1548	2017	microbiology	4	27
1548	2017	microbiology	5	41
1548	2017	microbiology	6	38
1548	2017	microbiology	7	46
1548	2017	microbiology	8	70
1548	2017	microbiology	9	26
1548	2017	microbiology	10	21
1548	2017	microbiology	11	26
1548	2017	microbiology	12	18
1549	2017	microbiology	1	33
1549	2017	microbiology	2	19
1549	2017	microbiology	3	20
1549	2017	microbiology	4	16
1549	2017	microbiology	5	17
1549	2017	microbiology	6	7
1549	2017	microbiology	7	7
1549	2017	microbiology	8	4
1549	2017	microbiology	9	4
1549	2017	microbiology	10	7
1549	2017	microbiology	11	7
1549	2017	microbiology	12	4
1550	2017	microbiology	1	33
1550	2017	microbiology	2	10
1550	2017	microbiology	3	18
1550	2017	microbiology	4	7
1550	2017	microbiology	5	20
1550	2017	microbiology	6	12
1550	2017	microbiology	7	12
1550	2017	microbiology	8	0
1550	2017	microbiology	9	10
1550	2017	microbiology	10	10
1550	2017	microbiology	11	8
1550	2017	microbiology	12	6
1551	2017	microbiology	1	71
1551	2017	microbiology	2	31
1551	2017	microbiology	3	31
1551	2017	microbiology	4	14
1551	2017	microbiology	5	19
1551	2017	microbiology	6	12
1551	2017	microbiology	7	13
1551	2017	microbiology	8	7
1551	2017	microbiology	9	9
1551	2017	microbiology	10	6
1551	2017	microbiology	11	8
1551	2017	microbiology	12	16
1552	2017	microbiology	1	42
1552	2017	microbiology	2	8
1552	2017	microbiology	3	5
1552	2017	microbiology	4	8
1552	2017	microbiology	5	3
1552	2017	microbiology	6	3
1552	2017	microbiology	7	4
1552	2017	microbiology	8	1
1552	2017	microbiology	9	0
1552	2017	microbiology	10	8
1552	2017	microbiology	11	6
1552	2017	microbiology	12	3
1553	2017	microbiology	1	154
1553	2017	microbiology	2	149
1553	2017	microbiology	3	83
1553	2017	microbiology	4	36
1553	2017	microbiology	5	23
1553	2017	microbiology	6	50
1553	2017	microbiology	7	28
1553	2017	microbiology	8	34
1553	2017	microbiology	9	168
1553	2017	microbiology	10	45
1553	2017	microbiology	11	57
1553	2017	microbiology	12	24
1554	2016	microbiology	1	35
1554	2016	microbiology	2	29
1554	2016	microbiology	3	7
1554	2016	microbiology	4	18
1554	2016	microbiology	5	12
1554	2016	microbiology	6	26
1554	2016	microbiology	7	7
1554	2016	microbiology	8	3
1554	2016	microbiology	9	1
1554	2016	microbiology	10	7
1554	2016	microbiology	11	15
1554	2016	microbiology	12	4
1555	2017	microbiology	1	147
1555	2017	microbiology	2	76
1555	2017	microbiology	3	61
1555	2017	microbiology	4	48
1555	2017	microbiology	5	13
1555	2017	microbiology	6	11
1555	2017	microbiology	7	2
1555	2017	microbiology	8	4
1555	2017	microbiology	9	3
1555	2017	microbiology	10	5
1555	2017	microbiology	11	9
1555	2017	microbiology	12	4
1556	2017	microbiology	1	31
1556	2017	microbiology	2	19
1556	2017	microbiology	3	8
1556	2017	microbiology	4	11
1556	2017	microbiology	5	105
1556	2017	microbiology	6	26
1556	2017	microbiology	7	10
1556	2017	microbiology	8	9
1556	2017	microbiology	9	5
1556	2017	microbiology	10	18
1556	2017	microbiology	11	13
1556	2017	microbiology	12	8
1557	2017	microbiology	1	31
1557	2017	microbiology	2	25
1557	2017	microbiology	3	14
1557	2017	microbiology	4	18
1557	2017	microbiology	5	12
1557	2017	microbiology	6	15
1557	2017	microbiology	7	10
1557	2017	microbiology	8	9
1557	2017	microbiology	9	18
1557	2017	microbiology	10	21
1557	2017	microbiology	11	14
1557	2017	microbiology	12	28
1558	2017	microbiology	1	117
1558	2017	microbiology	2	97
1558	2017	microbiology	3	54
1558	2017	microbiology	4	20
1558	2017	microbiology	5	14
1558	2017	microbiology	6	19
1558	2017	microbiology	7	24
1558	2017	microbiology	8	18
1558	2017	microbiology	9	14
1558	2017	microbiology	10	18
1558	2017	microbiology	11	25
1558	2017	microbiology	12	18
1559	2017	microbiology	1	43
1559	2017	microbiology	2	16
1559	2017	microbiology	3	15
1559	2017	microbiology	4	5
1559	2017	microbiology	5	32
1559	2017	microbiology	6	16
1559	2017	microbiology	7	15
1559	2017	microbiology	8	13
1559	2017	microbiology	9	14
1559	2017	microbiology	10	14
1559	2017	microbiology	11	6
1559	2017	microbiology	12	8
1560	2017	microbiology	1	246
1560	2017	microbiology	2	82
1560	2017	microbiology	3	37
1560	2017	microbiology	4	27
1560	2017	microbiology	5	43
1560	2017	microbiology	6	53
1560	2017	microbiology	7	33
1560	2017	microbiology	8	32
1560	2017	microbiology	9	36
1560	2017	microbiology	10	49
1560	2017	microbiology	11	52
1560	2017	microbiology	12	56
1561	2017	microbiology	1	53
1561	2017	microbiology	2	19
1561	2017	microbiology	3	16
1561	2017	microbiology	4	15
1561	2017	microbiology	5	7
1561	2017	microbiology	6	19
1561	2017	microbiology	7	17
1561	2017	microbiology	8	33
1561	2017	microbiology	9	18
1561	2017	microbiology	10	47
1561	2017	microbiology	11	65
1561	2017	microbiology	12	49
1562	2017	microbiology	1	39
1562	2017	microbiology	2	35
1562	2017	microbiology	3	21
1562	2017	microbiology	4	22
1562	2017	microbiology	5	41
1562	2017	microbiology	6	12
1562	2017	microbiology	7	22
1562	2017	microbiology	8	13
1562	2017	microbiology	9	40
1562	2017	microbiology	10	26
1562	2017	microbiology	11	18
1562	2017	microbiology	12	9
1563	2017	microbiology	1	22
1563	2017	microbiology	2	16
1563	2017	microbiology	3	23
1563	2017	microbiology	4	12
1563	2017	microbiology	5	14
1563	2017	microbiology	6	18
1563	2017	microbiology	7	6
1563	2017	microbiology	8	11
1563	2017	microbiology	9	8
1563	2017	microbiology	10	6
1563	2017	microbiology	11	30
1563	2017	microbiology	12	26
1564	2017	microbiology	1	98
1564	2017	microbiology	2	25
1564	2017	microbiology	3	48
1564	2017	microbiology	4	26
1564	2017	microbiology	5	44
1564	2017	microbiology	6	50
1564	2017	microbiology	7	41
1564	2017	microbiology	8	33
1564	2017	microbiology	9	44
1564	2017	microbiology	10	25
1564	2017	microbiology	11	32
1564	2017	microbiology	12	15
1565	2017	microbiology	1	43
1565	2017	microbiology	2	35
1565	2017	microbiology	3	49
1565	2017	microbiology	4	41
1565	2017	microbiology	5	63
1565	2017	microbiology	6	62
1565	2017	microbiology	7	49
1565	2017	microbiology	8	51
1565	2017	microbiology	9	81
1565	2017	microbiology	10	50
1565	2017	microbiology	11	105
1565	2017	microbiology	12	79
1566	2017	microbiology	1	64
1566	2017	microbiology	2	47
1566	2017	microbiology	3	16
1566	2017	microbiology	4	16
1566	2017	microbiology	5	20
1566	2017	microbiology	6	73
1566	2017	microbiology	7	15
1566	2017	microbiology	8	5
1566	2017	microbiology	9	5
1566	2017	microbiology	10	5
1566	2017	microbiology	11	4
1566	2017	microbiology	12	45
1567	2017	microbiology	1	96
1567	2017	microbiology	2	41
1567	2017	microbiology	3	46
1567	2017	microbiology	4	52
1567	2017	microbiology	5	30
1567	2017	microbiology	6	46
1567	2017	microbiology	7	16
1567	2017	microbiology	8	11
1567	2017	microbiology	9	19
1567	2017	microbiology	10	25
1567	2017	microbiology	11	28
1567	2017	microbiology	12	112
1568	2017	microbiology	1	69
1568	2017	microbiology	2	15
1568	2017	microbiology	3	22
1568	2017	microbiology	4	16
1568	2017	microbiology	5	17
1568	2017	microbiology	6	5
1568	2017	microbiology	7	18
1568	2017	microbiology	8	10
1568	2017	microbiology	9	3
1568	2017	microbiology	10	6
1568	2017	microbiology	11	6
1568	2017	microbiology	12	7
1569	2017	microbiology	1	36
1569	2017	microbiology	2	7
1569	2017	microbiology	3	22
1569	2017	microbiology	4	8
1569	2017	microbiology	5	2
1569	2017	microbiology	6	13
1569	2017	microbiology	7	14
1569	2017	microbiology	8	15
1569	2017	microbiology	9	10
1569	2017	microbiology	10	9
1569	2017	microbiology	11	8
1569	2017	microbiology	12	11
1570	2017	microbiology	1	29
1570	2017	microbiology	2	5
1570	2017	microbiology	3	4
1570	2017	microbiology	4	4
1570	2017	microbiology	5	13
1570	2017	microbiology	6	11
1570	2017	microbiology	7	6
1570	2017	microbiology	8	6
1570	2017	microbiology	9	1
1570	2017	microbiology	10	5
1570	2017	microbiology	11	3
1570	2017	microbiology	12	6
1571	2017	microbiology	1	89
1571	2017	microbiology	2	30
1571	2017	microbiology	3	21
1571	2017	microbiology	4	9
1571	2017	microbiology	5	3
1571	2017	microbiology	6	11
1571	2017	microbiology	7	6
1571	2017	microbiology	8	6
1571	2017	microbiology	9	6
1571	2017	microbiology	10	5
1571	2017	microbiology	11	6
1571	2017	microbiology	12	4
1572	2017	microbiology	1	47
1572	2017	microbiology	2	19
1572	2017	microbiology	3	21
1572	2017	microbiology	4	13
1572	2017	microbiology	5	13
1572	2017	microbiology	6	24
1572	2017	microbiology	7	20
1572	2017	microbiology	8	14
1572	2017	microbiology	9	27
1572	2017	microbiology	10	33
1572	2017	microbiology	11	20
1572	2017	microbiology	12	25
1573	2017	microbiology	1	16
1573	2017	microbiology	2	4
1573	2017	microbiology	3	12
1573	2017	microbiology	4	5
1573	2017	microbiology	5	9
1573	2017	microbiology	6	5
1573	2017	microbiology	7	4
1573	2017	microbiology	8	1
1573	2017	microbiology	9	2
1573	2017	microbiology	10	4
1573	2017	microbiology	11	4
1573	2017	microbiology	12	12
1574	2017	microbiology	1	135
1574	2017	microbiology	2	85
1574	2017	microbiology	3	21
1574	2017	microbiology	4	17
1574	2017	microbiology	5	17
1574	2017	microbiology	6	14
1574	2017	microbiology	7	20
1574	2017	microbiology	8	15
1574	2017	microbiology	9	7
1574	2017	microbiology	10	7
1574	2017	microbiology	11	4
1574	2017	microbiology	12	11
1575	2017	microbiology	1	74
1575	2017	microbiology	2	11
1575	2017	microbiology	3	28
1575	2017	microbiology	4	9
1575	2017	microbiology	5	5
1575	2017	microbiology	6	9
1575	2017	microbiology	7	7
1575	2017	microbiology	8	3
1575	2017	microbiology	9	20
1575	2017	microbiology	10	12
1575	2017	microbiology	11	29
1575	2017	microbiology	12	18
1576	2017	microbiology	1	447
1576	2017	microbiology	2	107
1576	2017	microbiology	3	72
1576	2017	microbiology	4	103
1576	2017	microbiology	5	148
1576	2017	microbiology	6	145
1576	2017	microbiology	7	130
1576	2017	microbiology	8	114
1576	2017	microbiology	9	217
1576	2017	microbiology	10	184
1576	2017	microbiology	11	220
1576	2017	microbiology	12	179
1577	2017	microbiology	1	114
1577	2017	microbiology	2	63
1577	2017	microbiology	3	53
1577	2017	microbiology	4	28
1577	2017	microbiology	5	35
1577	2017	microbiology	6	12
1577	2017	microbiology	7	6
1577	2017	microbiology	8	3
1577	2017	microbiology	9	7
1577	2017	microbiology	10	9
1577	2017	microbiology	11	4
1577	2017	microbiology	12	4
1578	2017	microbiology	1	108
1578	2017	microbiology	2	20
1578	2017	microbiology	3	10
1578	2017	microbiology	4	7
1578	2017	microbiology	5	10
1578	2017	microbiology	6	15
1578	2017	microbiology	7	44
1578	2017	microbiology	8	10
1578	2017	microbiology	9	18
1578	2017	microbiology	10	13
1578	2017	microbiology	11	27
1578	2017	microbiology	12	12
1579	2017	microbiology	1	48
1579	2017	microbiology	2	17
1579	2017	microbiology	3	11
1579	2017	microbiology	4	9
1579	2017	microbiology	5	8
1579	2017	microbiology	6	4
1579	2017	microbiology	7	6
1579	2017	microbiology	8	7
1579	2017	microbiology	9	5
1579	2017	microbiology	10	6
1579	2017	microbiology	11	8
1579	2017	microbiology	12	6
1580	2017	microbiology	1	51
1580	2017	microbiology	2	17
1580	2017	microbiology	3	5
1580	2017	microbiology	4	15
1580	2017	microbiology	5	9
1580	2017	microbiology	6	36
1580	2017	microbiology	7	8
1580	2017	microbiology	8	8
1580	2017	microbiology	9	5
1580	2017	microbiology	10	25
1580	2017	microbiology	11	31
1580	2017	microbiology	12	26
1581	2017	microbiology	1	148
1581	2017	microbiology	2	80
1581	2017	microbiology	3	85
1581	2017	microbiology	4	110
1581	2017	microbiology	5	72
1581	2017	microbiology	6	41
1581	2017	microbiology	7	9
1581	2017	microbiology	8	11
1581	2017	microbiology	9	9
1581	2017	microbiology	10	19
1581	2017	microbiology	11	22
1581	2017	microbiology	12	27
1582	2017	microbiology	1	47
1582	2017	microbiology	2	21
1582	2017	microbiology	3	40
1582	2017	microbiology	4	19
1582	2017	microbiology	5	9
1582	2017	microbiology	6	4
1582	2017	microbiology	7	5
1582	2017	microbiology	8	5
1582	2017	microbiology	9	5
1582	2017	microbiology	10	10
1582	2017	microbiology	11	7
1582	2017	microbiology	12	8
1583	2017	microbiology	1	66
1583	2017	microbiology	2	14
1583	2017	microbiology	3	18
1583	2017	microbiology	4	3
1583	2017	microbiology	5	9
1583	2017	microbiology	6	6
1583	2017	microbiology	7	11
1583	2017	microbiology	8	16
1583	2017	microbiology	9	4
1583	2017	microbiology	10	14
1583	2017	microbiology	11	20
1583	2017	microbiology	12	24
1584	2017	microbiology	1	139
1584	2017	microbiology	2	66
1584	2017	microbiology	3	22
1584	2017	microbiology	4	29
1584	2017	microbiology	5	27
1584	2017	microbiology	6	33
1584	2017	microbiology	7	24
1584	2017	microbiology	8	21
1584	2017	microbiology	9	14
1584	2017	microbiology	10	21
1584	2017	microbiology	11	35
1584	2017	microbiology	12	61
1585	2017	microbiology	1	70
1585	2017	microbiology	2	10
1585	2017	microbiology	3	15
1585	2017	microbiology	4	11
1585	2017	microbiology	5	10
1585	2017	microbiology	6	15
1585	2017	microbiology	7	13
1585	2017	microbiology	8	6
1585	2017	microbiology	9	6
1585	2017	microbiology	10	11
1585	2017	microbiology	11	10
1585	2017	microbiology	12	10
1603	2017	genomics	1	115
1603	2017	genomics	2	25
1603	2017	genomics	3	26
1603	2017	genomics	4	32
1603	2017	genomics	5	28
1603	2017	genomics	6	10
1603	2017	genomics	7	21
1603	2017	genomics	8	5
1603	2017	genomics	9	7
1603	2017	genomics	10	41
1603	2017	genomics	11	23
1603	2017	genomics	12	18
1634	2017	genomics	1	305
1634	2017	genomics	2	154
1634	2017	genomics	3	87
1634	2017	genomics	4	62
1634	2017	genomics	5	86
1634	2017	genomics	6	60
1634	2017	genomics	7	116
1634	2017	genomics	8	52
1634	2017	genomics	9	70
1634	2017	genomics	10	89
1634	2017	genomics	11	50
1634	2017	genomics	12	210
1645	2017	genomics	1	132
1645	2017	genomics	2	222
1645	2017	genomics	3	29
1645	2017	genomics	4	166
1645	2017	genomics	5	94
1645	2017	genomics	6	122
1645	2017	genomics	7	90
1645	2017	genomics	8	154
1645	2017	genomics	9	181
1645	2017	genomics	10	213
1645	2017	genomics	11	116
1645	2017	genomics	12	215
1648	2017	genomics	1	461
1648	2017	genomics	2	219
1648	2017	genomics	3	235
1648	2017	genomics	4	172
1648	2017	genomics	5	168
1648	2017	genomics	6	118
1648	2017	genomics	7	154
1648	2017	genomics	8	160
1648	2017	genomics	9	234
1648	2017	genomics	10	189
1648	2017	genomics	11	153
1648	2017	genomics	12	165
1656	2017	genomics	1	297
1656	2017	genomics	2	48
1656	2017	genomics	3	6
1656	2017	genomics	4	12
1656	2017	genomics	5	20
1656	2017	genomics	6	9
1656	2017	genomics	7	19
1656	2017	genomics	8	12
1656	2017	genomics	9	7
1656	2017	genomics	10	10
1656	2017	genomics	11	8
1656	2017	genomics	12	17
1680	2017	genomics	1	73
1680	2017	genomics	2	64
1680	2017	genomics	3	19
1680	2017	genomics	4	29
1680	2017	genomics	5	18
1680	2017	genomics	6	24
1680	2017	genomics	7	22
1680	2017	genomics	8	70
1680	2017	genomics	9	33
1680	2017	genomics	10	128
1680	2017	genomics	11	46
1680	2017	genomics	12	55
1681	2017	genomics	1	510
1681	2017	genomics	2	155
1681	2017	genomics	3	113
1681	2017	genomics	4	109
1681	2017	genomics	5	82
1681	2017	genomics	6	62
1681	2017	genomics	7	54
1681	2017	genomics	8	62
1681	2017	genomics	9	46
1681	2017	genomics	10	69
1681	2017	genomics	11	52
1681	2017	genomics	12	67
1708	2017	genomics	1	42
1708	2017	genomics	2	19
1708	2017	genomics	3	37
1708	2017	genomics	4	38
1708	2017	genomics	5	24
1708	2017	genomics	6	16
1708	2017	genomics	7	16
1708	2017	genomics	8	31
1708	2017	genomics	9	12
1708	2017	genomics	10	20
1708	2017	genomics	11	26
1708	2017	genomics	12	31
1728	2017	genomics	1	24
1728	2017	genomics	2	8
1728	2017	genomics	3	10
1728	2017	genomics	4	4
1728	2017	genomics	5	4
1728	2017	genomics	6	1
1728	2017	genomics	7	33
1728	2017	genomics	8	28
1728	2017	genomics	9	4
1728	2017	genomics	10	5
1728	2017	genomics	11	6
1728	2017	genomics	12	9
1740	2017	genomics	1	32
1740	2017	genomics	2	10
1740	2017	genomics	3	5
1740	2017	genomics	4	7
1740	2017	genomics	5	12
1740	2017	genomics	6	6
1740	2017	genomics	7	15
1740	2017	genomics	8	27
1740	2017	genomics	9	2
1740	2017	genomics	10	13
1740	2017	genomics	11	12
1740	2017	genomics	12	12
1741	2017	genomics	1	58
1741	2017	genomics	2	31
1741	2017	genomics	3	35
1741	2017	genomics	4	15
1741	2017	genomics	5	19
1741	2017	genomics	6	22
1741	2017	genomics	7	12
1741	2017	genomics	8	50
1741	2017	genomics	9	24
1741	2017	genomics	10	14
1741	2017	genomics	11	26
1741	2017	genomics	12	16
1758	2016	genomics	1	50
1758	2016	genomics	2	42
1758	2016	genomics	3	16
1758	2016	genomics	4	10
1758	2016	genomics	5	4
1758	2016	genomics	6	6
1758	2016	genomics	7	8
[truncated: 223,876 more rows]
