# Supplementary material for: Tracking the popularity and outcomes of all bioRxiv preprints
Source: eLife journal article supplement (doi:10.7554/elife.45133), 2019-04-24
Supplement: supp [file elife-45133-supp-v1.zip › elife_poa_e45133_Figure_2_figure_supplement_3_source_data_1.csv]

id	month	year	downloads
386	5	2018	64
387	8	2018	42
388	8	2018	57
389	7	2018	7
390	8	2018	24
391	8	2018	25
392	8	2018	37
393	8	2018	45
394	3	2018	132
395	8	2018	45
396	8	2018	46
397	8	2018	153
398	1	2018	56
399	7	2018	32
400	8	2018	69
401	8	2018	30
402	8	2018	18
403	8	2018	91
404	8	2018	79
405	8	2018	47
406	8	2018	17
407	8	2018	54
408	8	2018	74
409	8	2018	117
410	7	2018	5
411	7	2018	4
412	7	2018	5
413	7	2018	5
414	6	2018	88
415	7	2018	58
416	7	2018	18
417	7	2018	71
418	4	2018	35
419	7	2017	36
420	7	2018	21
421	7	2018	185
422	7	2018	123
423	7	2018	37
424	7	2018	17
425	2	2018	114
426	4	2018	36
427	3	2018	30
428	7	2018	26
429	10	2017	7
430	7	2018	90
431	7	2018	35
432	7	2018	18
433	7	2018	42
434	7	2018	38
435	7	2018	19
436	7	2018	27
437	2	2018	27
438	6	2018	37
439	7	2018	31
440	7	2018	27
441	7	2018	23
442	7	2018	17
443	7	2018	31
444	7	2018	37
445	7	2018	14
446	7	2018	37
447	7	2018	13
448	7	2018	18
449	7	2018	21
450	7	2018	18
451	7	2018	44
452	7	2018	17
453	7	2018	35
454	7	2018	84
455	7	2018	14
456	7	2018	24
457	7	2018	26
458	7	2018	36
459	7	2018	34
460	7	2018	34
461	7	2018	22
462	7	2018	20
463	7	2018	160
464	7	2018	42
465	7	2018	75
466	7	2018	75
467	7	2018	32
468	7	2018	121
469	6	2018	58
470	7	2018	163
471	7	2018	87
472	7	2018	129
473	7	2018	19
474	4	2018	36
475	7	2018	24
476	7	2018	41
477	7	2018	146
478	7	2018	26
479	6	2017	167
480	7	2018	43
481	7	2018	150
482	7	2018	37
483	7	2018	896
484	7	2018	188
485	6	2018	118
486	7	2018	615
487	7	2018	53
488	7	2018	81
489	7	2018	33
490	6	2018	50
491	7	2018	45
492	7	2018	36
493	5	2018	11
494	6	2018	42
495	7	2018	64
496	7	2018	49
497	7	2018	27
498	7	2018	72
499	7	2018	52
500	7	2018	40
501	7	2018	92
502	7	2018	155
503	7	2018	156
504	4	2018	22
505	7	2018	124
506	7	2018	35
507	7	2018	21
508	6	2018	32
509	7	2018	66
510	6	2018	16
511	7	2018	28
512	7	2018	91
513	7	2018	50
514	3	2018	450
515	6	2018	41
516	3	2018	179
517	7	2018	31
518	7	2018	72
519	7	2018	42
520	7	2018	41
521	3	2018	64
522	7	2018	105
523	7	2018	18
524	7	2018	27
525	7	2018	44
526	2	2018	369
527	7	2018	45
528	7	2018	149
529	7	2018	65
530	7	2018	42
531	7	2018	374
532	7	2018	112
533	6	2018	28
534	1	2018	51
535	6	2018	126
536	7	2018	26
537	7	2018	18
538	7	2018	59
539	7	2018	29
540	11	2017	49
541	10	2017	49
542	7	2018	85
543	7	2018	53
544	7	2018	117
545	7	2018	59
546	7	2018	25
547	7	2018	34
548	7	2018	86
549	7	2018	34
550	7	2018	46
551	7	2018	42
552	7	2018	29
553	7	2018	64
554	7	2018	51
555	7	2018	33
556	7	2018	167
557	7	2017	8
558	7	2018	80
559	7	2018	27
560	7	2018	35
561	7	2018	182
562	12	2017	52
563	7	2018	71
564	12	2017	44
565	6	2018	73
566	6	2018	27
567	5	2018	177
568	7	2018	39
569	1	2018	968
570	7	2018	42
571	7	2018	125
572	7	2018	154
573	7	2018	124
574	7	2018	52
575	7	2018	159
576	7	2018	45
577	7	2018	38
578	7	2018	290
579	7	2018	87
580	7	2018	32
581	7	2018	44
582	7	2018	59
583	7	2018	80
584	7	2018	124
585	6	2018	7
586	6	2018	8
587	6	2018	5
588	6	2018	88
589	6	2018	113
590	6	2018	49
591	8	2017	55
592	6	2018	7
593	6	2018	14
594	6	2018	15
595	6	2018	8
596	5	2018	182
597	6	2018	27
598	6	2018	76
599	6	2018	51
600	6	2018	9
601	6	2018	32
602	4	2018	15
603	6	2018	29
604	6	2018	14
605	6	2018	28
606	6	2018	40
607	6	2018	40
608	6	2018	116
609	6	2018	47
610	6	2018	24
611	6	2018	13
612	6	2018	56
613	6	2018	19
614	6	2018	240
615	6	2018	13
616	6	2018	23
617	6	2018	30
618	6	2018	19
619	6	2018	17
620	6	2018	326
621	6	2018	15
622	6	2018	24
623	6	2018	172
624	6	2018	52
625	6	2018	25
626	6	2018	66
627	6	2018	180
628	5	2018	43
629	6	2018	18
630	6	2018	43
631	6	2018	11
632	6	2018	75
633	6	2018	15
634	5	2018	14
635	6	2018	13
636	6	2018	63
637	6	2018	68
638	6	2018	31
639	6	2018	268
640	6	2018	14
641	6	2018	81
642	6	2018	34
643	5	2018	63
644	6	2018	21
645	6	2018	20
646	6	2018	16
647	6	2018	22
648	6	2018	25
649	6	2018	17
650	6	2018	93
651	6	2018	22
652	6	2018	52
653	6	2018	24
654	6	2018	63
655	6	2018	36
656	6	2018	43
657	6	2018	22
658	2	2018	95
659	6	2018	43
660	6	2018	34
661	6	2018	21
662	6	2018	20
663	6	2018	21
664	6	2018	19
665	6	2018	73
666	6	2018	21
667	6	2018	31
668	3	2017	26
669	6	2018	53
670	6	2018	29
671	6	2018	40
672	6	2018	146
673	6	2018	16
674	6	2018	31
675	6	2018	213
676	6	2018	51
677	6	2017	40
678	6	2018	55
679	6	2018	124
680	6	2018	41
681	1	2018	151
682	5	2018	37
683	6	2018	292
684	5	2018	117
685	6	2018	47
686	6	2018	56
687	6	2018	129
688	6	2018	42
689	6	2018	37
690	6	2018	23
691	6	2018	10
692	6	2018	19
693	12	2017	264
694	1	2018	103
695	6	2018	69
696	3	2018	30
697	6	2018	26
698	6	2018	15
699	6	2018	171
700	6	2018	23
701	6	2018	172
702	6	2018	35
703	6	2018	38
704	6	2018	16
705	6	2018	67
706	6	2018	67
707	6	2018	20
708	6	2018	65
709	6	2018	44
710	6	2018	35
711	6	2018	32
712	6	2018	35
713	6	2018	28
714	6	2018	279
715	6	2018	95
716	6	2018	67
717	6	2018	19
718	6	2018	15
719	6	2018	88
720	6	2018	23
721	6	2018	27
722	6	2018	31
723	6	2018	34
724	6	2018	52
725	3	2018	212
726	6	2018	13
727	6	2018	109
728	6	2018	30
729	6	2018	61
730	6	2018	29
731	6	2018	186
732	6	2018	29
733	6	2018	115
734	6	2018	26
735	6	2018	32
736	6	2018	53
737	6	2018	229
738	6	2018	31
739	6	2018	69
740	6	2018	43
741	6	2018	21
742	5	2018	63
743	6	2018	56
744	3	2018	80
745	12	2017	136
746	6	2018	26
747	6	2018	53
748	6	2018	333
749	6	2018	76
750	6	2018	107
751	6	2018	98
752	6	2018	54
753	6	2018	21
754	6	2018	28
755	6	2018	80
756	6	2018	35
757	6	2018	23
758	6	2018	13
759	6	2018	25
760	6	2018	79
761	6	2018	35
762	6	2018	47
763	6	2018	51
764	6	2018	20
765	6	2018	65
766	6	2018	32
767	6	2018	73
768	6	2018	48
769	6	2018	22
770	6	2018	23
771	6	2018	39
772	6	2018	24
773	6	2018	21
774	1	2018	47
775	10	2017	7
776	6	2018	26
777	6	2018	37
778	6	2018	75
779	6	2018	35
780	6	2018	64
781	6	2018	41
782	6	2018	147
783	6	2018	32
784	6	2018	47
785	6	2018	103
786	1	2018	76
787	3	2018	36
788	6	2018	75
789	5	2018	128
790	6	2018	45
791	5	2018	48
792	6	2018	56
793	6	2018	13
794	6	2018	49
795	6	2018	33
796	6	2018	34
797	6	2018	24
798	6	2018	11
799	6	2018	22
800	6	2018	14
801	6	2018	23
802	6	2018	16
803	6	2018	106
804	12	2017	305
805	6	2018	55
806	6	2018	159
807	6	2018	37
808	5	2018	1
809	5	2018	3
810	5	2018	2
811	9	2017	31
812	5	2018	12
813	5	2018	17
814	5	2018	8
815	5	2018	8
816	5	2018	13
817	5	2018	7
818	5	2018	12
819	5	2018	8
820	5	2018	9
821	5	2018	8
822	5	2018	155
823	5	2018	11
824	5	2018	30
825	5	2018	11
826	5	2018	9
827	5	2018	70
828	5	2018	72
829	5	2018	14
830	5	2018	95
831	5	2018	7
832	5	2018	8
833	5	2018	12
834	5	2018	6
835	1	2018	13
836	5	2018	17
837	5	2018	28
838	5	2018	14
839	5	2018	13
840	5	2018	30
841	5	2018	17
842	5	2018	52
843	5	2018	60
844	5	2018	12
845	5	2018	165
846	5	2018	24
847	5	2018	61
848	5	2018	19
849	5	2018	29
850	5	2018	44
851	4	2018	15
852	5	2018	16
853	5	2018	45
854	5	2018	115
855	5	2018	41
856	5	2018	13
857	5	2018	42
858	5	2018	19
859	5	2018	44
860	5	2018	22
861	5	2018	45
862	5	2018	21
863	5	2018	116
864	7	2016	155
865	5	2018	59
866	5	2018	46
867	5	2018	52
868	5	2018	31
869	5	2018	38
870	1	2018	44
871	5	2018	40
872	5	2018	152
873	5	2018	33
874	5	2018	121
875	5	2018	28
876	5	2018	39
877	5	2018	27
878	5	2018	39
879	5	2018	20
880	5	2018	20
881	5	2018	97
882	5	2018	16
883	5	2018	27
884	5	2018	30
885	5	2018	86
886	5	2018	19
887	5	2018	61
888	5	2018	19
889	5	2018	30
890	5	2018	114
891	5	2018	59
892	3	2018	52
893	5	2018	37
894	5	2018	56
895	5	2018	131
896	5	2018	19
897	5	2018	49
898	5	2018	20
899	5	2018	26
900	5	2018	50
901	3	2018	48
902	5	2018	33
903	5	2018	14
904	5	2018	19
905	5	2018	26
906	5	2018	41
907	5	2018	118
908	5	2018	36
909	5	2018	35
910	5	2018	40
911	5	2018	21
912	5	2018	26
913	5	2018	14
914	5	2018	32
915	5	2018	30
916	5	2018	18
917	5	2018	29
918	5	2018	88
919	5	2018	25
920	5	2018	27
921	5	2018	47
922	5	2018	112
923	5	2018	39
924	5	2018	67
925	5	2018	51
926	5	2018	46
927	4	2018	45
928	4	2018	44
929	5	2018	135
930	4	2018	30
931	5	2018	33
932	5	2018	32
933	5	2018	88
934	5	2018	81
935	5	2018	23
936	5	2018	44
937	5	2018	29
938	5	2018	23
939	5	2018	16
940	5	2018	119
941	5	2018	43
942	5	2018	58
943	5	2018	41
944	3	2017	391
945	5	2018	35
946	5	2018	28
947	2	2018	130
948	5	2018	49
949	5	2018	39
950	5	2018	361
951	5	2018	35
952	5	2018	168
953	5	2018	22
954	5	2018	35
955	5	2018	18
956	5	2018	20
957	5	2018	24
958	5	2018	31
959	5	2018	65
960	5	2018	16
961	5	2018	169
962	5	2018	19
963	5	2018	22
964	5	2018	27
965	5	2018	51
966	5	2018	18
967	5	2018	106
968	5	2018	19
969	5	2018	44
970	5	2018	28
971	5	2018	59
972	5	2018	109
973	3	2018	8
974	5	2018	18
975	5	2018	53
976	5	2018	45
977	5	2018	124
978	5	2018	19
979	5	2018	98
980	5	2018	43
981	5	2018	90
982	5	2018	28
983	5	2018	88
984	5	2018	53
985	1	2018	82
986	7	2017	49
987	5	2018	29
988	5	2018	36
989	5	2018	21
990	5	2018	22
991	5	2018	21
992	5	2018	42
993	10	2017	26
994	5	2018	60
995	5	2018	50
996	5	2018	31
997	5	2018	25
998	5	2018	19
999	5	2018	22
1000	5	2018	38
1001	5	2018	35
1002	5	2018	17
1003	5	2018	31
1004	5	2018	103
1005	5	2018	27
1006	5	2018	112
1007	5	2018	99
1008	5	2018	13
1009	5	2018	102
1010	5	2018	18
1011	5	2018	43
1012	5	2018	20
1013	5	2018	41
1014	5	2018	37
1015	5	2018	103
1016	5	2018	43
1017	5	2018	133
1018	5	2018	122
1019	2	2018	67
1020	5	2018	39
1021	5	2018	45
1022	5	2018	122
1023	5	2018	36
1024	5	2018	34
1025	5	2018	18
1026	5	2018	35
1027	5	2018	21
1028	5	2018	69
1029	5	2018	19
1030	5	2018	54
1031	5	2018	40
1032	5	2018	49
1033	5	2018	172
1034	4	2018	19
1035	5	2018	97
1036	2	2018	49
1037	5	2018	319
1038	5	2018	218
1039	5	2018	193
1040	5	2018	65
1041	5	2018	32
1042	5	2018	81
1043	5	2018	31
1044	5	2018	44
1045	5	2018	89
1046	5	2018	79
1047	5	2018	77
1048	5	2018	50
1049	5	2018	43
1050	5	2018	54
1051	4	2018	43
1052	5	2017	205
1053	2	2018	47
1054	5	2018	173
1055	5	2018	63
1056	5	2018	32
1057	5	2018	52
1058	5	2018	118
1059	5	2018	28
1060	5	2018	41
1061	5	2018	58
1062	5	2018	185
1063	5	2018	63
1064	12	2016	184
1065	2	2018	87
1066	5	2018	65
1067	5	2018	34
1068	5	2018	21
1069	5	2018	69
1070	5	2018	50
1071	4	2018	51
1072	4	2018	6
1073	5	2018	131
1074	5	2018	30
1075	5	2018	58
1076	5	2018	25
1077	5	2018	12
1078	5	2018	14
1079	5	2018	187
1080	5	2018	28
1081	4	2018	17
1082	4	2018	8
1083	4	2018	26
1084	4	2018	7
1085	4	2018	10
1086	4	2018	6
1087	4	2018	4
1088	4	2018	12
1089	4	2017	126
1090	4	2018	14
1091	4	2018	17
1092	6	2016	640
1093	11	2017	69
1094	4	2018	8
1095	4	2018	45
1096	4	2018	13
1097	4	2018	25
1098	4	2018	8
1099	4	2018	19
1100	4	2018	13
1101	4	2018	19
1102	4	2018	8
1103	4	2018	26
1104	4	2018	111
1105	4	2018	29
1106	4	2018	16
1107	4	2018	61
1108	4	2018	52
1109	4	2018	74
1110	4	2018	63
1111	4	2018	41
1112	4	2018	151
1113	6	2017	54
1114	4	2018	93
1115	4	2018	151
1116	4	2018	11
1117	4	2018	13
1118	4	2018	16
1119	4	2018	13
1120	4	2018	19
1121	4	2018	15
1122	4	2018	29
1123	4	2018	25
1124	4	2018	23
1125	4	2018	267
1126	4	2018	20
1127	4	2018	24
1128	4	2018	15
1129	4	2018	11
1130	4	2018	9
1131	4	2018	19
1132	4	2018	23
1133	4	2018	41
1134	1	2018	101
1135	4	2018	43
1136	1	2018	41
1137	8	2017	76
1138	4	2018	49
1139	4	2018	78
1140	4	2018	112
1141	4	2018	19
1142	4	2018	39
1143	4	2018	30
1144	4	2018	21
1145	4	2018	21
1146	4	2018	24
1147	4	2018	72
1148	4	2018	35
1149	4	2018	15
1150	4	2018	21
1151	2	2018	36
1152	4	2018	82
1153	3	2018	98
1154	4	2018	16
1155	10	2017	97
1156	4	2018	44
1157	4	2018	39
1158	4	2018	23
1159	4	2018	50
1160	9	2017	67
1161	4	2018	23
1162	4	2018	253
1163	4	2018	31
1164	4	2018	124
1165	4	2018	96
1166	4	2018	29
1167	4	2018	98
1168	4	2018	16
1169	4	2018	39
1170	4	2018	21
1171	4	2018	36
1172	4	2018	34
1173	4	2018	19
1174	4	2018	35
1175	4	2018	14
1176	4	2018	263
1177	3	2018	93
1178	4	2018	42
1179	4	2018	46
1180	4	2018	80
1181	4	2018	72
1182	4	2018	22
1183	4	2018	57
1184	4	2018	18
1185	4	2018	50
1186	4	2018	44
1187	4	2018	15
1188	4	2018	39
1189	4	2018	80
1190	4	2018	29
1191	4	2018	14
1192	4	2018	21
1193	4	2018	19
1194	6	2017	167
1195	4	2018	20
1196	4	2018	39
1197	4	2018	31
1198	4	2018	49
1199	4	2018	15
1200	4	2018	89
1201	4	2018	33
1202	4	2018	17
1203	4	2018	31
1204	4	2018	27
1205	4	2018	14
1206	4	2018	17
1207	4	2018	89
1208	4	2018	56
1209	10	2017	54
1210	3	2018	265
1211	4	2018	13
1212	4	2018	329
1213	4	2018	50
1214	4	2018	54
1215	4	2018	27
1216	4	2018	30
1217	4	2018	33
1218	4	2018	54
1219	2	2017	72
1220	3	2018	136
1221	4	2018	47
1222	4	2018	70
1223	11	2017	131
1224	4	2018	31
1225	4	2018	78
1226	4	2018	36
1227	4	2018	26
1228	4	2018	68
1229	4	2018	104
1230	4	2018	96
1231	4	2018	40
1232	3	2018	24
1233	4	2018	27
1234	4	2018	39
1235	12	2017	60
1236	8	2017	84
1237	11	2017	212
1238	4	2018	38
1239	4	2018	93
1240	4	2018	67
1241	4	2018	87
1242	3	2018	28
1243	4	2018	78
1244	2	2018	85
1245	4	2018	14
1246	4	2018	31
1247	4	2018	20
1248	4	2018	22
1249	4	2018	17
1250	4	2018	23
1251	4	2018	147
1252	4	2018	47
1253	4	2018	40
1254	11	2017	82
1255	9	2017	56
1256	6	2017	53
1257	3	2018	14
1258	3	2018	40
1259	11	2017	107
1260	3	2018	114
1261	3	2018	121
1262	3	2018	26
1263	3	2018	58
1264	3	2018	40
1265	3	2018	16
1266	12	2017	107
1267	11	2017	114
1268	12	2017	115
1269	3	2018	25
1270	3	2018	45
1271	3	2018	86
1272	3	2018	21
1273	11	2017	69
1274	3	2018	66
1275	10	2017	162
1276	3	2018	36
1277	3	2018	42
1278	3	2018	38
1279	9	2017	62
1280	3	2018	231
1281	3	2018	129
1282	3	2018	139
1283	3	2018	94
1284	3	2018	26
1285	3	2018	25
1286	3	2018	134
1287	3	2018	26
1288	3	2018	42
1289	1	2018	74
1290	3	2018	165
1291	3	2018	57
1292	3	2018	65
1293	3	2018	44
1294	3	2018	139
1295	8	2017	77
1296	3	2018	139
1297	3	2018	22
1298	2	2018	101
1299	3	2018	123
1300	7	2017	110
1301	3	2018	37
1302	7	2017	12
1303	3	2018	27
1304	3	2018	32
1305	12	2017	115
1306	7	2017	43
1307	3	2018	177
1308	12	2017	134
1309	3	2018	39
1310	3	2018	129
1311	3	2018	319
1312	1	2017	173
1313	3	2018	156
1314	3	2018	74
1315	3	2018	74
1316	3	2018	499
1317	3	2018	60
1318	3	2018	44
1319	3	2018	69
1320	3	2018	125
1321	3	2018	75
1322	3	2018	289
1323	5	2017	15
1324	3	2018	58
1325	3	2018	81
1326	2	2018	72
1327	2	2018	37
1328	3	2018	184
1329	3	2018	1305
1330	3	2018	82
1331	3	2018	49
1332	3	2018	63
1333	12	2017	135
1334	3	2018	95
1335	3	2018	76
1336	3	2018	103
1337	3	2018	263
1338	11	2017	178
1339	3	2018	81
1340	6	2016	35
1341	3	2018	92
1342	3	2018	182
1343	3	2018	69
1344	2	2018	61
1345	3	2018	152
1346	3	2018	98
1347	3	2018	39
1348	3	2018	50
1349	3	2018	117
1350	3	2018	60
1351	3	2018	369
1352	3	2018	24
1353	3	2018	194
1354	3	2018	129
1355	10	2017	24
1356	3	2018	69
1357	1	2018	17
1358	2	2018	34
1359	2	2018	11
1360	2	2018	32
1361	2	2018	155
1362	2	2018	32
1363	2	2018	25
1364	2	2018	20
1365	2	2018	41
1366	2	2018	31
1367	2	2018	65
1368	10	2017	130
1369	2	2018	208
1370	2	2018	36
1371	2	2018	20
1372	4	2017	92
1373	2	2018	45
1374	2	2018	29
1375	2	2018	11
1376	2	2018	88
1377	2	2018	62
1378	2	2018	33
1379	11	2017	101
1380	9	2017	56
1381	2	2018	38
1382	2	2018	145
1383	10	2017	25
1384	1	2018	109
1385	10	2017	36
1386	2	2018	81
1387	2	2018	32
1388	2	2018	98
1389	2	2018	65
1390	2	2018	41
1391	2	2018	45
1392	11	2017	178
1393	2	2018	59
1394	2	2018	89
1395	2	2018	22
1396	2	2018	74
1397	2	2018	120
1398	1	2018	174
1399	2	2018	147
1400	2	2018	147
1401	2	2018	152
1402	9	2017	146
1403	2	2018	104
1404	2	2018	235
1405	2	2018	57
1406	2	2018	212
1407	1	2018	91
1408	11	2017	110
1409	2	2018	82
1410	2	2018	95
1411	2	2018	113
1412	2	2018	55
1413	2	2018	82
1414	2	2018	150
1415	2	2018	91
1416	2	2018	49
1417	2	2018	375
1418	11	2017	60
1419	2	2018	162
1420	2	2018	64
1421	2	2018	793
1422	2	2018	57
1423	11	2017	49
1424	7	2017	50
1425	2	2018	217
1426	2	2018	36
1427	2	2018	48
1428	2	2018	133
1429	11	2017	176
1430	2	2018	208
1431	2	2018	178
1432	2	2018	86
1433	2	2018	107
1434	2	2018	73
1435	1	2018	73
1436	2	2018	251
1437	2	2018	346
1438	2	2018	62
1439	8	2017	92
1440	1	2018	7
1441	1	2018	644
1442	1	2018	8
1443	1	2018	14
1444	1	2018	285
1445	1	2018	27
1446	1	2018	27
1447	1	2018	72
1448	5	2016	58
1449	1	2018	14
1450	1	2018	94
1451	9	2017	84
1452	1	2018	188
1453	1	2018	383
1454	1	2018	28
1455	1	2018	41
1456	12	2017	61
1457	4	2016	66
1458	1	2018	67
1459	1	2018	28
1460	1	2018	120
1461	1	2018	626
1462	1	2018	25
1463	1	2018	48
1464	1	2018	27
1465	1	2018	51
1466	12	2017	91
1467	1	2018	87
1468	1	2018	51
1469	10	2017	84
1470	9	2017	23
1471	9	2017	18
1472	1	2018	77
1473	10	2017	51
1474	1	2018	21
1475	1	2018	29
1476	1	2018	60
1477	10	2017	312
1478	7	2017	28
1479	1	2018	54
1480	1	2018	41
1481	12	2016	70
1482	1	2018	157
1483	1	2018	403
1484	1	2018	72
1485	1	2018	168
1486	11	2017	58
1487	1	2018	98
1488	1	2018	42
1489	1	2018	288
1490	1	2018	111
1491	1	2018	75
1492	1	2018	156
1493	1	2018	254
1494	1	2018	22
1495	1	2018	35
1496	1	2018	51
1497	10	2017	75
1498	1	2018	148
1499	1	2018	687
1500	10	2017	54
1501	1	2018	199
1502	11	2017	108
1503	1	2017	141
1504	1	2018	211
1505	11	2017	27
1506	1	2018	68
1507	1	2018	252
1508	1	2018	126
1509	1	2018	101
1510	8	2017	136
1511	1	2018	99
1512	1	2018	78
1513	1	2018	61
1514	1	2018	50
1515	1	2018	37
1516	1	2018	179
1517	11	2017	65
1518	11	2017	106
1519	1	2018	45
1520	1	2018	74
1521	1	2018	114
1522	1	2018	119
1523	11	2015	49
1524	12	2017	20
1525	1	2018	171
1526	12	2017	29
1527	12	2017	71
1528	12	2017	13
1529	10	2017	86
1530	12	2017	48
1531	12	2017	25
1532	12	2016	152
1533	12	2017	163
1534	12	2017	37
1535	12	2017	459
1536	7	2017	19
1537	12	2017	338
1538	12	2017	19
1539	12	2017	17
1540	12	2017	62
1541	9	2017	142
1542	9	2017	43
1543	12	2017	32
1544	12	2017	97
1545	12	2017	22
1546	12	2017	26
1547	12	2017	101
1548	12	2017	129
1549	12	2017	33
1550	12	2017	33
1551	12	2017	71
1552	12	2017	42
1553	4	2017	154
1554	10	2016	35
1555	12	2017	147
1556	12	2017	31
1557	12	2017	31
1558	12	2017	117
1559	8	2017	43
1560	12	2017	246
1561	12	2017	53
1562	4	2017	39
1563	12	2017	22
1564	12	2017	98
1565	12	2017	43
1566	12	2017	64
1567	12	2017	96
1568	12	2017	69
1569	6	2017	36
1570	12	2017	29
1571	12	2017	89
1572	12	2017	47
1573	12	2017	16
1574	11	2017	135
1575	12	2017	74
1576	12	2017	447
1577	11	2017	114
1578	6	2017	108
1579	12	2017	48
1580	12	2017	51
1581	9	2017	148
1582	12	2017	47
1583	12	2017	66
1584	12	2017	139
1585	12	2017	70
1586	8	2018	253
1587	8	2018	151
1588	8	2018	1024
1589	8	2018	236
1590	6	2018	24
1591	5	2018	966
1592	8	2018	365
1593	8	2018	252
1594	8	2018	314
1595	8	2018	85
1596	8	2018	2351
1597	2	2018	18
1598	7	2018	207
1599	8	2018	41
1600	7	2018	27
1601	8	2018	99
1602	8	2018	36
1603	11	2017	115
1604	8	2018	71
1605	8	2018	108
1606	8	2018	71
1607	8	2018	49
1608	8	2018	108
1609	8	2018	35
1610	4	2018	177
1611	8	2018	15
1612	8	2018	427
1613	7	2018	45
1614	7	2018	34
1615	7	2018	101
1616	7	2018	7
1617	7	2018	86
1618	5	2018	159
1619	1	2018	278
1620	7	2018	60
1621	2	2018	454
1622	3	2018	246
1623	6	2018	283
1624	7	2018	407
1625	7	2018	188
1626	7	2018	81
1627	7	2018	27
1628	7	2018	31
1629	7	2018	881
1630	4	2018	62
1631	7	2018	61
1632	6	2018	180
1633	7	2018	84
1634	8	2017	305
1635	7	2018	514
1636	7	2018	16
1637	7	2018	113
1638	7	2018	25
1639	4	2018	83
1640	7	2018	32
1641	7	2018	38
1642	7	2018	17
1643	7	2018	70
1644	7	2018	43
1645	10	2017	132
1646	7	2018	56
1647	7	2018	64
1648	11	2017	461
1649	7	2018	54
1650	7	2018	136
1651	3	2018	345
1652	7	2018	260
1653	7	2018	142
1654	7	2018	160
1655	7	2018	208
1656	4	2017	297
1657	7	2018	223
1658	7	2018	112
1659	7	2018	506
1660	7	2018	391
1661	7	2018	38
1662	7	2018	151
1663	7	2018	586
1664	7	2018	81
1665	7	2018	115
1666	7	2018	153
1667	7	2018	78
1668	7	2018	46
1669	6	2018	132
1670	7	2018	70
1671	7	2018	301
1672	7	2018	94
1673	7	2018	22
1674	7	2018	55
1675	7	2018	30
1676	7	2018	141
1677	7	2018	180
1678	7	2018	150
1679	5	2018	56
1680	12	2017	73
1681	7	2017	510
1682	7	2018	377
1683	7	2018	808
1684	7	2018	162
1685	7	2018	438
1686	7	2018	135
1687	7	2018	43
1688	7	2018	357
1689	7	2018	156
1690	7	2018	37
1691	7	2018	39
1692	5	2018	78
1693	7	2018	266
1694	3	2018	282
1695	7	2018	67
1696	7	2018	69
1697	6	2018	342
1698	7	2018	112
1699	7	2018	86
1700	7	2018	21
1701	7	2018	23
1702	7	2018	662
1703	7	2018	89
1704	7	2018	143
1705	7	2018	23
1706	7	2018	104
1707	7	2018	115
1708	12	2017	42
1709	7	2018	726
1710	6	2018	255
1711	5	2018	568
1712	7	2018	115
1713	7	2018	152
1714	7	2018	67
1715	7	2018	200
1716	7	2018	72
1717	7	2018	269
1718	7	2018	94
1719	7	2018	97
1720	6	2018	56
1721	7	2018	346
1722	7	2018	259
1723	7	2018	68
1724	7	2018	879
1725	7	2018	78
1726	7	2018	96
1727	7	2018	116
1728	12	2017	24
1729	4	2018	61
1730	7	2018	138
1731	7	2018	626
1732	1	2018	59
1733	7	2018	80
1734	7	2018	131
1735	7	2018	48
1736	7	2018	44
1737	7	2018	150
1738	7	2018	48
1739	4	2018	17
1740	12	2017	32
1741	12	2017	58
1742	7	2018	22
1743	7	2018	84
1744	7	2018	50
1745	7	2018	43
1746	7	2018	59
1747	7	2018	294
1748	7	2018	19
1749	7	2018	23
1750	7	2018	158
1751	7	2018	33
1752	6	2018	456
1753	7	2018	99
1754	6	2018	36
1755	7	2018	35
1756	7	2018	622
1757	2	2018	102
1758	6	2016	50
1759	7	2018	310
1760	12	2017	286
1761	6	2018	39
1762	5	2018	68
1763	6	2018	14
1764	6	2018	41
1765	6	2018	34
1766	6	2018	39
1767	6	2018	28
1768	6	2018	163
1769	4	2018	59
1770	6	2018	59
1771	6	2018	13
1772	6	2018	67
1773	6	2018	69
1774	6	2018	230
1775	6	2018	14
1776	6	2018	34
1777	6	2018	29
1778	4	2018	77
1779	6	2018	413
1780	6	2018	382
1781	6	2018	37
1782	1	2017	1683
1783	6	2018	137
1784	6	2018	100
1785	6	2018	291
1786	6	2018	79
1787	6	2018	48
1788	6	2018	176
1789	6	2018	35
1790	6	2018	37
1791	6	2018	58
1792	5	2018	69
1793	2	2018	17
1794	6	2018	83
1795	3	2018	106
1796	3	2018	713
1797	6	2018	61
1798	6	2018	86
1799	6	2018	31
1800	6	2018	128
1801	6	2018	102
1802	6	2018	87
1803	6	2018	67
1804	6	2018	102
1805	6	2018	83
1806	6	2018	25
1807	6	2018	133
1808	4	2017	34
1809	6	2018	758
1810	6	2018	70
1811	6	2018	75
1812	6	2018	23
1813	6	2018	60
1814	6	2018	180
1815	6	2018	124
1816	6	2018	746
1817	6	2018	23
1818	6	2018	62
1819	9	2017	249
1820	4	2018	22
1821	6	2018	27
1822	12	2017	332
1823	6	2018	94
1824	6	2018	236
1825	6	2018	127
1826	6	2018	158
1827	6	2018	44
1828	6	2018	121
1829	9	2017	112
1830	4	2018	362
1831	6	2018	204
1832	6	2018	63
1833	6	2018	210
1834	6	2018	139
1835	5	2018	332
1836	6	2018	44
1837	6	2018	189
1838	6	2018	260
1839	6	2018	214
1840	9	2017	850
1841	6	2018	27
1842	6	2018	806
1843	6	2018	98
1844	6	2018	216
1845	6	2018	582
1846	1	2018	81
1847	3	2018	230
1848	6	2018	61
1849	6	2018	276
1850	6	2018	137
1851	10	2017	100
1852	6	2018	65
1853	6	2018	114
1854	6	2018	59
1855	6	2018	281
1856	3	2018	470
1857	6	2018	142
1858	3	2018	109
1859	2	2018	980
1860	2	2018	401
1861	9	2017	116
1862	6	2018	62
1863	6	2018	63
1864	6	2018	35
1865	6	2018	15
1866	6	2018	157
1867	6	2018	49
1868	5	2017	225
1869	6	2018	118
1870	6	2018	115
1871	6	2018	44
1872	6	2018	92
1873	9	2016	187
1874	6	2018	232
1875	6	2018	101
1876	6	2018	345
1877	6	2018	40
1878	5	2018	150
1879	6	2018	540
1880	6	2018	229
1881	6	2018	1135
1882	6	2018	40
1883	6	2018	154
1884	6	2018	341
1885	6	2018	33
1886	5	2018	190
1887	6	2018	141
1888	6	2018	174
1889	6	2018	31
1890	6	2018	52
1891	6	2018	80
1892	6	2018	77
1893	5	2018	39
1894	1	2018	345
1895	5	2018	144
1896	4	2017	196
1897	5	2018	3
1898	5	2018	42
1899	5	2018	33
1900	5	2018	3
1901	5	2018	30
1902	5	2018	83
1903	5	2018	149
1904	4	2018	103
1905	5	2018	1318
1906	5	2018	169
1907	5	2018	154
1908	5	2018	233
1909	2	2018	39
1910	3	2018	317
1911	5	2018	153
1912	5	2018	70
1913	5	2018	92
1914	5	2018	24
1915	5	2018	35
1916	5	2018	37
1917	5	2018	52
1918	1	2018	244
1919	5	2018	56
1920	5	2018	22
1921	2	2018	363
1922	5	2018	63
1923	5	2018	139
1924	5	2018	33
1925	10	2016	167
1926	5	2018	575
1927	5	2018	980
1928	5	2018	104
1929	12	2016	252
1930	5	2018	520
1931	2	2018	361
1932	5	2018	48
1933	5	2018	331
1934	5	2018	32
1935	5	2018	292
1936	5	2018	470
1937	5	2018	41
1938	5	2018	167
1939	5	2018	678
1940	5	2018	55
1941	5	2018	109
1942	3	2018	434
1943	12	2017	446
1944	6	2017	203
1945	2	2018	82
1946	4	2018	151
1947	2	2018	330
1948	9	2016	35
1949	5	2018	63
1950	5	2018	868
1951	5	2018	523
1952	5	2018	29
1953	3	2018	186
1954	5	2018	102
1955	5	2018	132
1956	5	2018	244
1957	5	2018	3277
1958	5	2018	80
1959	1	2018	5
1960	5	2018	125
1961	5	2018	76
1962	11	2017	73
1963	3	2018	151
1964	9	2017	422
1965	5	2018	825
1966	5	2018	122
1967	5	2018	201
1968	5	2018	107
1969	5	2018	157
1970	5	2018	63
1971	5	2018	297
1972	5	2018	258
1973	5	2018	24
1974	5	2018	43
1975	5	2018	51
1976	5	2018	124
1977	5	2018	361
1978	5	2018	237
1979	5	2018	267
1980	5	2018	85
1981	5	2018	168
1982	5	2018	105
1983	4	2018	2120
1984	4	2018	16
1985	5	2018	166
1986	5	2018	183
1987	5	2018	234
1988	5	2017	79
1989	1	2018	105
1990	7	2017	122
1991	5	2018	220
1992	5	2018	78
1993	5	2018	263
1994	5	2018	3312
1995	5	2018	82
1996	5	2018	74
1997	5	2018	58
1998	5	2018	174
1999	5	2018	44
2000	3	2017	535
2001	5	2018	107
2002	5	2018	1798
2003	5	2018	369
2004	5	2018	89
2005	10	2016	194
2006	5	2018	931
2007	5	2018	128
2008	5	2018	149
2009	8	2017	203
2010	5	2018	219
2011	5	2018	258
2012	5	2018	331
2013	4	2018	93
2014	5	2018	62
2015	5	2018	272
2016	2	2018	281
2017	3	2018	1067
2018	4	2018	18
2019	4	2018	28
2020	4	2018	51
2021	4	2018	84
2022	11	2017	629
2023	4	2018	32
2024	4	2018	32
2025	4	2018	29
2026	4	2018	370
2027	4	2018	386
2028	4	2018	45
2029	4	2018	525
2030	11	2016	608
2031	4	2018	18
2032	8	2018	155
2033	8	2018	132
2034	8	2018	79
2035	8	2018	56
2036	8	2018	177
2037	8	2018	51
2038	8	2018	150
2039	8	2018	99
2040	8	2018	117
2041	7	2018	38
2042	8	2018	81
2043	7	2018	170
2044	8	2018	77
2045	8	2018	46
2046	8	2018	43
2047	8	2018	97
2048	8	2018	194
2049	8	2018	116
2050	8	2018	24
2051	8	2018	21
2052	8	2018	393
2053	3	2018	200
2054	4	2018	35
2055	8	2018	41
2056	8	2018	30
2057	6	2017	12
2058	8	2018	58
2059	8	2018	22
2060	8	2018	120
2061	8	2018	54
2062	6	2018	209
2063	8	2018	15
2064	8	2018	230
2065	7	2018	31
2066	8	2018	39
2067	8	2018	23
2068	7	2018	15
2069	7	2018	5
2070	7	2018	12
2071	7	2018	12
2072	12	2017	124
2073	7	2018	14
2074	7	2018	12
2075	4	2018	61
2076	7	2018	29
2077	6	2018	27
2078	7	2018	26
2079	7	2018	28
2080	7	2018	17
2081	7	2018	25
2082	7	2018	37
2083	7	2018	30
2084	7	2018	879
2085	7	2018	29
2086	7	2018	33
2087	9	2017	15
2088	4	2018	313
2089	7	2018	140
2090	7	2018	53
2091	7	2018	44
2092	7	2018	23
2093	7	2018	146
2094	7	2018	32
2095	7	2018	15
2096	7	2018	94
2097	7	2018	231
2098	5	2018	77
2099	7	2018	327
2100	7	2018	19
2101	7	2018	97
2102	7	2018	67
2103	7	2018	21
2104	7	2018	16
2105	7	2018	48
2106	7	2018	319
2107	7	2018	68
2108	7	2017	138
2109	7	2018	47
2110	7	2018	327
2111	6	2018	80
2112	7	2018	63
2113	7	2018	89
2114	7	2018	164
2115	7	2018	53
2116	7	2018	103
2117	7	2018	42
2118	7	2018	65
2119	7	2018	406
2120	7	2018	189
2121	7	2018	89
2122	7	2018	51
2123	7	2018	145
2124	7	2018	59
2125	2	2018	167
2126	7	2018	84
2127	7	2018	35
2128	7	2018	92
2129	7	2018	105
2130	6	2018	124
2131	12	2017	111
2132	12	2017	19
2133	7	2018	38
2134	7	2018	197
2135	5	2018	44
2136	7	2018	95
2137	7	2018	79
2138	7	2018	32
2139	2	2018	42
2140	10	2017	140
2141	7	2018	30
2142	7	2018	69
2143	7	2018	139
2144	7	2018	240
2145	4	2018	36
2146	5	2018	9
2147	8	2018	125
2148	8	2018	504
2149	7	2018	30
2150	8	2018	287
2151	5	2018	35
2152	8	2018	115
2153	8	2018	59
2154	8	2018	62
2155	8	2018	107
2156	8	2018	220
2157	3	2018	178
2158	8	2018	53
2159	8	2018	89
2160	8	2018	74
2161	4	2018	111
2162	6	2018	57
2163	7	2018	53
2164	8	2018	22
2165	8	2018	56
2166	8	2018	25
2167	8	2018	65
2168	8	2018	59
2169	8	2018	94
2170	7	2018	117
2171	6	2018	98
2172	8	2018	601
2173	8	2018	39
2174	8	2018	53
2175	8	2018	21
2176	7	2018	13
2177	7	2018	6
2178	8	2018	28
2179	7	2018	45
2180	7	2018	25
2181	7	2018	30
2182	7	2018	23
2183	7	2018	16
2184	7	2018	24
2185	7	2018	90
2186	3	2018	28
2187	7	2018	28
2188	7	2018	110
2189	7	2018	38
2190	7	2018	17
2191	7	2018	20
2192	7	2018	22
2193	7	2018	256
2194	7	2018	140
2195	7	2018	67
2196	7	2018	13
2197	7	2018	96
2198	7	2018	21
2199	7	2018	16
2200	7	2018	33
2201	7	2018	17
2202	7	2018	31
2203	7	2018	44
2204	7	2018	119
2205	7	2018	27
2206	7	2018	291
2207	7	2018	78
2208	7	2018	82
2209	7	2018	88
2210	7	2018	22
2211	7	2018	131
2212	7	2018	82
2213	7	2018	42
2214	7	2018	58
2215	7	2018	63
2216	3	2018	26
2217	5	2018	569
2218	4	2018	353
2219	7	2018	28
2220	7	2018	135
2221	7	2018	76
2222	7	2018	361
2223	7	2018	25
2224	7	2018	32
2225	7	2018	5246
2226	7	2018	41
2227	6	2017	14
2228	7	2018	120
2229	7	2018	64
2230	7	2018	85
2231	7	2018	293
2232	7	2018	60
2233	7	2018	99
2234	11	2017	317
2235	7	2018	106
2236	7	2017	40
2237	6	2018	68
2238	7	2018	259
2239	6	2018	109
2240	7	2018	238
2241	7	2018	139
2242	4	2018	825
2243	7	2017	128
2244	7	2018	99
2245	7	2018	139
2246	7	2018	16
2247	9	2017	181
2248	6	2018	56
2249	7	2018	122
2250	7	2018	68
2251	7	2018	219
2252	5	2018	117
2253	7	2018	41
2254	7	2018	140
2255	7	2018	185
2256	7	2018	144
2257	11	2017	284
2258	6	2018	43
2259	7	2018	468
2260	7	2018	193
2261	7	2018	44
2262	6	2018	240
2263	7	2018	208
2264	7	2018	74
2265	7	2018	150
2266	7	2018	61
2267	7	2018	113
2268	5	2018	30
2269	7	2018	71
2270	5	2018	56
2271	6	2018	112
2272	6	2018	50
2273	7	2018	248
2274	7	2018	191
2275	6	2017	103
2276	6	2018	82
2277	7	2018	1089
2278	7	2018	87
2279	7	2018	38
2280	7	2018	526
2281	7	2018	446
2282	7	2018	138
2283	8	2017	111
2284	8	2017	424
2285	7	2018	195
2286	7	2018	75
2287	5	2018	41
2288	6	2018	85
2289	6	2018	18
2290	7	2018	97
2291	7	2018	218
2292	7	2018	48
2293	4	2018	216
2294	1	2017	440
2295	7	2018	44
2296	7	2018	39
2297	7	2018	59
2298	7	2018	27
2299	7	2018	255
2300	11	2017	167
2301	7	2018	98
2302	7	2018	142
2303	7	2018	129
2304	7	2018	31
2305	7	2018	41
2306	7	2018	449
2307	7	2018	69
2308	7	2018	113
2309	6	2018	62
2310	5	2018	49
2311	3	2018	85
2312	7	2018	82
2313	3	2018	20
2314	9	2017	152
2315	7	2018	214
2316	7	2018	600
2317	7	2018	70
2318	5	2018	90
2319	7	2018	51
2320	7	2018	118
2321	12	2017	99
2322	7	2018	346
2323	7	2018	285
2324	7	2018	47
2325	7	2018	123
2326	7	2018	63
2327	5	2018	202
2328	11	2017	90
2329	7	2018	426
2330	7	2018	88
2331	9	2017	171
2332	7	2018	229
2333	7	2018	530
2334	7	2018	20
2335	7	2018	26
2336	7	2018	171
2337	7	2018	527
2338	7	2018	165
2339	7	2018	197
2340	7	2018	105
2341	5	2018	151
2342	7	2018	69
2343	7	2018	457
2344	2	2018	257
2345	7	2018	141
2346	7	2018	90
2347	7	2018	293
2348	7	2018	107
2349	7	2018	53
2350	7	2018	89
2351	7	2018	66
2352	5	2018	45
2353	5	2018	215
2354	5	2018	146
2355	6	2018	122
2356	7	2018	44
2357	7	2018	90
2358	7	2018	70
2359	7	2018	360
2360	6	2018	100
2361	7	2018	46
2362	7	2018	86
2363	4	2018	115
2364	7	2018	136
2365	7	2018	274
2366	7	2018	422
2367	12	2017	3822
2368	7	2018	48
2369	7	2018	115
2370	7	2018	122
2371	7	2018	69
2372	7	2018	63
2373	7	2018	97
2374	7	2018	93
2375	7	2018	58
2376	6	2018	19
2377	12	2017	163
2378	6	2018	12
2379	6	2018	5
2380	6	2018	21
2381	6	2018	18
2382	6	2018	30
2383	6	2018	22
2384	6	2018	34
[truncated: 35,649 more rows]
