# Supplementary material for: Tracking the popularity and outcomes of all bioRxiv preprints
Source: eLife journal article supplement (doi:10.7554/elife.45133), 2019-04-24
Supplement: supp [file elife-45133-supp-v1.zip › elife_poa_e45133_Figure_2_figure_supplement_3_source_data_2.csv]

id	year	downloads
21370	2016	96047
14036	2017	50483
16066	2016	34862
6917	2018	25891
28654	2016	21422
6985	2018	19745
19809	2018	18223
10661	2015	15170
7960	2017	13279
3421	2017	11223
14736	2017	10806
27360	2017	10787
7865	2017	10544
30003	2016	9756
28706	2016	9031
10561	2015	8615
34593	2018	8313
7496	2017	8294
22539	2018	7873
16272	2016	7756
13080	2018	7660
10360	2016	7286
7242	2017	6735
18231	2016	6630
29943	2016	6306
6959	2016	6095
13873	2017	5990
8289	2016	5896
7786	2017	5656
37420	2018	5546
9431	2018	5538
28724	2015	5504
2225	2018	5246
10394	2016	4854
23208	2015	4819
22935	2017	4769
9684	2017	4643
22772	2017	4577
16234	2016	4490
10357	2016	4399
15114	2016	4382
28634	2017	4198
8473	2016	4197
8441	2015	4084
22785	2017	4043
28711	2016	3945
16804	2018	3828
2367	2017	3822
9852	2017	3799
5170	2016	3682
8312	2016	3629
28985	2016	3591
4784	2016	3548
13168	2018	3501
8355	2015	3495
11935	2018	3466
34156	2018	3424
7973	2017	3405
15241	2016	3338
1994	2018	3312
1957	2018	3277
16258	2016	3259
37097	2018	3201
24852	2018	3200
20024	2016	3145
7606	2017	3130
14952	2017	3102
6951	2018	3029
12226	2018	3027
7388	2017	3002
28259	2017	2974
11930	2018	2965
8050	2016	2942
7896	2017	2924
10771	2018	2908
10603	2015	2905
10732	2013	2898
31862	2018	2782
13568	2018	2747
36545	2018	2740
8617	2015	2735
8188	2016	2713
7834	2017	2706
7421	2017	2699
6708	2015	2639
20515	2017	2623
3300	2018	2581
22064	2018	2573
25500	2017	2559
14303	2017	2554
24790	2018	2552
8228	2016	2523
15630	2017	2513
10078	2017	2506
10282	2015	2502
20210	2018	2498
30260	2018	2440
21731	2017	2437
13012	2018	2431
8023	2016	2430
35822	2018	2426
10557	2015	2410
8504	2015	2408
6655	2016	2393
8503	2015	2380
4080	2017	2379
13001	2018	2378
33940	2018	2376
7971	2017	2354
1596	2018	2351
25938	2016	2342
28673	2017	2292
16276	2016	2283
22570	2017	2280
11416	2017	2280
26420	2015	2279
28567	2018	2269
10599	2015	2236
27304	2017	2233
35794	2018	2231
8634	2015	2230
1905	2018	2216
35104	2018	2201
2547	2017	2196
15867	2017	2193
11291	2017	2157
7728	2017	2154
5201	2016	2148
4175	2017	2130
27324	2016	2125
1983	2018	2120
17194	2017	2104
8571	2015	2097
3294	2018	2096
8899	2018	2081
19270	2016	2077
28565	2018	2067
7784	2017	2058
28608	2017	2052
7764	2017	2047
3107	2018	2033
9821	2017	1987
13100	2018	1975
31804	2018	1969
3857	2017	1933
3528	2017	1930
35353	2018	1930
22224	2018	1896
24381	2017	1889
7598	2017	1868
5499	2015	1847
15991	2016	1844
6905	2018	1838
17198	2017	1833
28350	2017	1808
7710	2017	1803
2002	2018	1798
14388	2017	1792
16494	2016	1789
22348	2017	1783
26516	2014	1776
26273	2015	1770
12080	2018	1760
24053	2016	1751
28669	2017	1746
28609	2018	1738
8788	2014	1718
7957	2017	1718
35726	2018	1712
7308	2017	1689
1782	2017	1683
8291	2016	1681
25699	2017	1679
21200	2018	1676
27437	2016	1654
14225	2017	1650
19502	2018	1647
28714	2015	1646
9122	2017	1643
33080	2018	1643
20524	2018	1626
26808	2018	1624
16568	2015	1612
21581	2017	1612
26272	2015	1611
7390	2017	1608
28604	2018	1589
9770	2017	1588
4369	2017	1575
32689	2018	1569
7802	2017	1565
9585	2017	1560
10657	2015	1559
25466	2017	1558
20697	2017	1555
7007	2017	1549
15377	2017	1542
9630	2017	1538
24724	2017	1534
16054	2016	1530
18185	2017	1529
13420	2018	1526
15526	2017	1524
9524	2017	1523
20888	2016	1520
7833	2016	1513
27476	2016	1511
12525	2017	1511
5193	2016	1509
11611	2018	1509
8313	2016	1508
28699	2016	1501
35295	2018	1489
26196	2016	1488
36973	2018	1486
20576	2018	1484
30123	2017	1482
7469	2017	1481
7628	2017	1481
5064	2015	1479
8833	2014	1476
13513	2018	1475
16389	2016	1473
8122	2016	1467
8537	2015	1463
8527	2015	1463
7538	2017	1460
28244	2017	1459
11253	2017	1454
28556	2018	1450
10299	2016	1448
16670	2014	1445
23291	2018	1444
5058	2016	1443
9237	2016	1442
20461	2018	1441
5534	2015	1439
36084	2018	1436
9841	2017	1434
9322	2017	1430
5642	2014	1430
14019	2018	1428
10509	2015	1424
36964	2018	1422
31073	2016	1417
8750	2013	1412
4798	2016	1410
34939	2018	1410
3226	2018	1410
7629	2017	1408
34464	2018	1406
6933	2018	1405
7545	2017	1403
24762	2017	1399
8249	2016	1395
9325	2018	1394
18198	2017	1392
16181	2016	1380
36477	2018	1375
10170	2016	1371
28877	2017	1369
38807	2016	1358
7797	2017	1350
26664	2014	1349
13032	2018	1345
9487	2017	1344
9373	2018	1341
10358	2016	1339
19899	2017	1338
21531	2017	1338
8464	2016	1335
28658	2017	1333
3750	2017	1328
16644	2015	1328
6644	2016	1327
9408	2018	1327
36648	2018	1326
9731	2017	1320
28775	2018	1315
2916	2018	1308
9056	2018	1306
1329	2018	1305
14649	2017	1302
5539	2015	1302
10703	2014	1301
31486	2018	1299
25624	2017	1299
32686	2018	1296
5651	2014	1294
34312	2018	1292
24974	2017	1291
33844	2018	1291
2693	2018	1290
8668	2015	1287
10267	2016	1286
16305	2016	1285
13874	2017	1280
8863	2018	1280
9954	2017	1277
14947	2017	1275
29876	2016	1271
9330	2018	1271
8207	2016	1271
15506	2017	1269
28713	2016	1266
34117	2018	1260
18337	2018	1259
33843	2018	1258
8828	2014	1258
4856	2016	1257
15629	2017	1257
26167	2016	1254
4915	2016	1253
9732	2016	1253
30492	2018	1247
28788	2018	1245
38660	2016	1244
8168	2016	1243
8126	2016	1241
36388	2018	1239
21428	2017	1231
8548	2015	1228
15693	2017	1227
5151	2016	1227
8292	2016	1224
3787	2017	1223
7801	2017	1223
21805	2016	1219
8963	2018	1216
32683	2018	1216
3906	2017	1214
28494	2015	1213
17687	2018	1212
5112	2016	1210
10776	2018	1208
1281	2018	1208
7851	2017	1206
29190	2018	1206
29381	2018	1206
17992	2017	1205
8662	2015	1205
9740	2017	1203
9647	2017	1199
4490	2017	1199
29861	2016	1195
18036	2018	1193
25238	2016	1192
35947	2018	1191
8202	2016	1190
12492	2018	1189
26851	2018	1184
21055	2018	1183
25687	2017	1182
26226	2015	1181
4916	2016	1180
36045	2018	1176
30923	2017	1173
26662	2013	1171
15370	2017	1171
26066	2016	1171
20417	2016	1168
3481	2017	1168
10368	2016	1162
23769	2017	1162
35958	2018	1160
2012	2018	1159
29234	2018	1158
30823	2017	1157
7888	2017	1155
28653	2017	1155
23205	2015	1153
25179	2017	1151
34197	2018	1151
29092	2018	1149
27321	2017	1146
8787	2014	1144
11154	2017	1143
20541	2018	1140
33862	2018	1139
12125	2018	1138
2907	2017	1137
16161	2016	1137
9818	2017	1136
8212	2016	1136
28279	2017	1136
10256	2016	1135
1881	2018	1135
5213	2015	1131
26306	2015	1130
7935	2017	1128
7062	2018	1128
25916	2016	1127
7402	2017	1127
9930	2017	1125
18110	2017	1125
10364	2016	1123
5711	2014	1121
5665	2014	1120
5085	2016	1117
32792	2018	1117
27470	2016	1116
7149	2017	1115
29414	2018	1113
28611	2018	1107
22958	2017	1106
28550	2018	1103
9228	2018	1100
29049	2015	1100
28140	2017	1099
22191	2018	1097
20086	2018	1097
17549	2018	1097
30339	2018	1096
14924	2017	1095
38772	2016	1093
31979	2018	1092
2277	2018	1089
22588	2017	1084
36088	2018	1081
14427	2017	1080
34992	2018	1080
31767	2018	1080
22277	2018	1078
7624	2017	1077
25479	2017	1069
2017	2018	1067
22378	2018	1066
37153	2018	1066
4573	2017	1064
33083	2018	1064
8253	2016	1063
20434	2016	1063
4252	2017	1062
7887	2017	1061
7868	2016	1060
4913	2016	1059
19726	2017	1056
9428	2017	1055
37145	2018	1055
5593	2015	1055
5832	2018	1053
27676	2017	1051
8121	2016	1050
16235	2016	1047
8219	2016	1044
5745	2014	1042
19948	2017	1042
9933	2017	1039
7352	2017	1038
32108	2018	1037
6899	2018	1033
9883	2017	1032
13070	2018	1032
26356	2015	1032
28835	2018	1030
30929	2016	1030
14739	2017	1026
14214	2017	1025
7165	2017	1025
1588	2018	1024
31552	2018	1024
28685	2017	1021
8936	2017	1019
27284	2017	1019
35740	2018	1017
19041	2017	1016
35347	2018	1014
27485	2016	1013
2779	2017	1012
12826	2018	1011
9547	2017	1009
5696	2014	1009
33371	2018	1007
26603	2014	1007
32983	2018	1005
6808	2018	1005
30176	2017	1004
15333	2017	1004
29846	2017	1002
17949	2017	1000
14605	2017	999
15577	2017	996
9516	2017	996
19311	2016	995
10407	2016	994
13884	2018	993
8190	2016	992
10260	2016	991
26659	2014	991
12212	2018	991
24784	2017	990
30495	2018	990
22934	2017	988
28668	2017	987
9057	2018	985
18232	2016	985
12131	2018	985
10642	2015	984
4954	2015	984
15781	2017	983
6438	2017	983
7289	2017	981
29215	2018	981
3550	2017	980
20741	2016	980
1859	2018	980
1927	2018	980
32192	2018	978
7798	2017	978
7523	2017	973
9159	2017	971
16249	2016	970
569	2018	968
5409	2015	967
7433	2017	967
36725	2018	967
1591	2018	966
5980	2017	965
15330	2017	965
13808	2017	965
16332	2016	964
12784	2018	964
9054	2018	963
28802	2018	962
38742	2016	960
8021	2017	959
4069	2017	959
36571	2018	958
13510	2018	955
9552	2017	953
23561	2018	953
22474	2018	952
19295	2016	952
29360	2017	949
4669	2017	949
33935	2018	948
7448	2017	946
29917	2016	946
28816	2018	946
17530	2018	945
17475	2018	943
7998	2017	943
16610	2014	942
6986	2017	941
17020	2018	939
1898	2018	939
13764	2018	938
4630	2016	938
7514	2017	936
28240	2017	934
30975	2016	933
2983	2018	933
2006	2018	931
27198	2017	931
10190	2016	931
11989	2018	931
8506	2015	930
1441	2018	930
36076	2018	929
7657	2017	927
5751	2014	927
34807	2018	926
19304	2016	925
9486	2017	924
17786	2015	922
26853	2018	921
7224	2015	920
24876	2018	920
20979	2017	919
7221	2017	918
7418	2017	917
32442	2018	915
32115	2018	914
34130	2018	914
12401	2018	913
10285	2016	913
25682	2017	910
24493	2018	909
13185	2018	907
23149	2016	907
32103	2018	906
37376	2018	905
3817	2017	901
38712	2016	900
25134	2017	899
4989	2016	898
34669	2018	898
19212	2016	897
14691	2017	896
483	2018	896
10518	2015	895
16151	2016	895
34907	2018	894
2719	2018	894
7239	2017	894
5176	2016	894
33204	2018	893
16398	2016	893
28987	2016	892
31246	2018	892
35862	2018	891
34162	2018	890
7074	2016	890
10484	2016	890
34855	2018	889
18359	2018	888
34410	2018	887
27393	2017	887
14766	2017	885
10355	2016	882
6416	2017	882
8457	2015	882
3792	2016	881
16709	2013	881
1629	2018	881
27187	2017	881
24431	2018	881
13828	2018	880
7716	2017	880
30758	2017	879
1724	2018	879
2084	2018	879
7684	2017	878
6955	2018	876
23326	2018	876
7205	2017	875
26132	2015	874
10241	2016	873
9353	2018	873
21423	2017	872
27067	2018	871
32235	2018	869
1950	2018	868
33211	2018	868
33553	2018	867
28639	2017	867
27346	2017	867
35661	2018	866
10433	2016	865
25260	2017	865
15739	2017	865
4185	2017	864
34540	2018	863
13539	2018	863
8290	2016	862
11043	2018	862
25543	2017	862
31936	2018	861
24615	2017	861
7783	2017	860
7982	2017	860
12599	2018	860
4432	2016	860
32687	2018	859
32688	2018	856
29409	2018	856
9847	2017	855
7832	2017	855
7639	2017	853
10601	2015	851
30427	2018	851
1840	2017	850
33199	2018	850
8235	2016	850
26095	2016	849
30202	2018	849
27494	2016	848
30836	2017	848
28655	2017	848
9268	2017	847
24257	2018	846
30351	2018	846
8645	2015	844
5714	2014	844
36385	2018	843
14413	2017	843
11744	2018	842
5640	2014	841
5135	2016	840
4694	2016	839
31241	2018	839
7661	2017	839
25549	2017	838
28638	2016	837
28971	2017	836
25499	2016	836
10057	2016	836
24344	2018	835
10731	2013	834
26476	2015	833
33015	2018	833
20677	2017	831
29731	2017	829
6383	2017	828
7071	2018	827
13812	2017	826
9313	2018	826
2242	2018	825
1965	2018	825
22976	2017	825
8993	2018	825
3448	2018	824
7182	2018	824
24367	2018	824
14899	2016	823
5394	2015	822
35673	2018	821
27343	2017	820
2395	2018	819
36808	2018	818
2544	2018	818
30727	2017	816
31937	2018	816
10420	2015	816
27816	2018	815
3354	2018	815
13911	2017	814
10183	2016	813
5101	2016	813
25930	2016	812
30175	2017	812
26315	2015	812
4442	2017	811
10063	2017	811
7222	2017	811
28586	2018	811
8867	2018	809
1683	2018	808
3122	2018	807
12196	2018	807
1842	2018	806
20501	2018	806
7586	2017	805
1448	2016	805
33315	2018	803
24849	2018	803
5130	2016	802
32290	2018	802
7738	2017	802
8783	2014	801
3866	2017	801
34298	2018	800
9177	2018	800
3043	2017	800
28537	2013	799
8279	2016	799
13191	2018	799
8529	2015	798
16428	2016	797
10027	2016	797
7316	2017	795
37401	2018	795
1421	2018	793
25242	2016	793
11742	2018	792
7638	2017	792
16328	2016	792
4187	2016	791
34654	2018	791
30983	2016	790
25375	2017	790
4184	2017	790
9437	2018	790
7810	2017	789
10637	2015	789
7281	2017	788
8468	2016	787
27503	2015	786
8640	2015	786
5192	2016	785
17907	2018	784
13524	2018	784
29051	2014	784
7603	2017	784
4901	2016	783
5578	2015	780
15972	2016	780
25996	2015	778
7795	2017	778
16564	2015	777
5674	2014	777
2468	2018	776
28235	2017	776
13217	2018	775
36484	2018	775
31125	2015	774
14663	2017	773
15173	2017	772
9270	2018	772
10193	2016	772
4960	2015	771
34627	2018	771
21328	2018	770
7408	2017	770
7404	2017	769
9008	2018	769
37361	2018	768
26038	2016	767
11590	2018	767
3939	2017	767
28318	2017	767
8701	2015	766
33486	2018	766
10694	2014	765
8083	2016	765
15677	2017	764
25023	2017	763
9546	2017	763
18199	2017	762
15505	2017	762
8437	2016	761
7756	2017	760
21626	2017	760
7080	2017	759
3179	2018	758
9544	2017	758
35325	2018	758
1809	2018	758
4765	2016	757
8921	2018	757
9765	2017	757
7486	2017	756
3971	2017	756
21075	2017	756
6847	2018	755
27524	2014	755
6457	2017	755
8623	2015	752
36394	2018	752
10736	2014	751
7630	2017	750
32568	2018	749
25259	2017	749
15579	2017	748
3493	2017	747
26718	2018	747
7660	2017	746
1816	2018	746
26297	2015	745
9102	2018	744
27462	2016	744
7974	2017	744
27408	2017	744
5542	2015	743
6982	2018	742
5242	2015	741
23574	2018	741
2026	2018	740
30661	2017	740
12635	2018	740
37099	2018	739
22929	2017	738
3840	2017	737
30186	2015	736
8058	2016	735
22089	2018	735
12152	2018	734
22296	2018	734
16676	2014	733
7294	2017	733
2648	2018	732
13656	2018	731
32933	2018	731
12730	2018	731
3341	2016	730
36181	2018	729
10926	2018	729
7736	2017	729
31024	2016	728
13339	2018	727
21442	2017	727
4271	2017	726
1709	2018	726
15717	2017	725
22533	2017	725
14507	2017	724
9641	2017	723
14651	2017	723
7905	2017	722
6478	2016	722
7515	2017	721
2891	2018	720
29397	2018	720
4439	2016	719
8087	2016	718
10148	2016	716
14544	2017	715
13817	2018	715
24773	2018	715
13192	2018	714
29017	2016	713
1796	2018	713
8683	2015	713
10059	2017	712
11264	2017	711
10272	2016	711
11316	2017	710
7612	2017	710
36577	2018	710
32179	2018	710
36633	2018	708
3076	2018	707
36868	2018	707
14479	2017	707
38766	2016	706
36965	2018	706
13738	2018	704
7405	2017	703
8059	2016	703
7455	2017	701
8216	2016	700
4675	2016	700
11283	2017	700
31065	2016	699
7158	2018	699
35777	2018	699
32226	2018	699
14150	2017	698
24459	2018	698
8450	2016	697
35972	2018	697
4242	2017	697
17526	2018	697
16698	2014	697
9290	2018	696
4247	2017	695
35553	2018	695
4535	2016	695
8319	2016	694
26849	2018	694
31321	2018	694
33959	2018	693
4075	2017	693
10209	2016	693
28744	2018	693
21530	2017	692
16622	2015	690
36153	2018	690
8265	2016	689
36943	2018	689
3330	2018	689
3254	2017	688
27258	2017	688
37204	2018	687
14670	2017	687
1499	2018	687
7268	2017	686
38681	2017	686
8588	2015	686
31855	2018	685
6419	2017	685
10631	2015	684
36738	2018	684
7913	2017	684
9083	2018	683
627	2018	680
27410	2017	680
37105	2018	680
32898	2018	679
8148	2016	678
3278	2018	678
1939	2018	678
34641	2018	678
28930	2017	677
29130	2018	677
27711	2016	676
6413	2017	676
8477	2016	676
13309	2018	676
7438	2017	675
7117	2017	675
14689	2017	674
12520	2018	673
31679	2018	673
6111	2017	673
29844	2016	673
30814	2017	673
20402	2017	672
29526	2017	672
9400	2017	672
9354	2018	671
32246	2018	671
28624	2017	671
7348	2017	670
8560	2015	669
34201	2018	669
7927	2017	668
22714	2017	668
11195	2017	667
18202	2017	667
3471	2018	667
15737	2017	667
24325	2018	667
22842	2017	666
9932	2017	666
35228	2018	663
34459	2018	663
20865	2016	663
5681	2014	663
1702	2018	662
37230	2018	661
33453	2018	661
26169	2016	661
8648	2015	661
11543	2018	661
13385	2018	660
17700	2018	660
7582	2017	659
28674	2017	658
29212	2017	658
9229	2018	657
11187	2017	657
34240	2018	656
2840	2018	655
14113	2017	655
29595	2017	655
23536	2018	655
9697	2017	653
4520	2017	653
8403	2016	652
19038	2016	652
10052	2017	652
29895	2016	651
20775	2017	651
21967	2017	650
6961	2018	650
22957	2017	650
12366	2018	649
15554	2017	649
8341	2015	649
10284	2016	649
31869	2018	649
12615	2017	648
4487	2017	648
24434	2018	648
9390	2018	647
3895	2017	647
28894	2017	646
10945	2018	646
27684	2017	646
25536	2015	646
25140	2017	646
33032	2018	645
5395	2015	645
31707	2018	643
14695	2017	643
25015	2017	643
6679	2016	643
36164	2018	643
31605	2018	643
34460	2018	642
7926	2017	642
12903	2017	642
21057	2018	641
1092	2016	640
10640	2014	640
20432	2016	640
4289	2017	640
16948	2018	640
17390	2018	640
7616	2017	640
3443	2018	638
1752	2018	638
36833	2018	637
8156	2016	637
13943	2018	636
7843	2017	635
24444	2018	635
4695	2016	634
7735	2017	634
7409	2017	634
38764	2016	634
32644	2018	633
27062	2018	633
7215	2017	633
6857	2018	633
9104	2017	632
12882	2018	632
27480	2016	632
4567	2016	631
23937	2017	631
9600	2017	631
14583	2017	631
2392	2017	630
8840	2013	630
5843	2018	630
31988	2018	630
2898	2018	629
2022	2017	629
7792	2015	629
7781	2017	628
3610	2017	628
36415	2018	628
14836	2017	628
7032	2017	628
7992	2017	627
3246	2018	627
9136	2018	627
25000	2017	626
15871	2016	626
1461	2018	626
1731	2018	626
11184	2017	626
10667	2015	626
8234	2016	625
34892	2018	623
27063	2018	623
23943	2017	623
7718	2016	623
8475	2016	622
1756	2018	622
26558	2014	622
8572	2015	621
12805	2017	621
7415	2017	620
24595	2018	620
24056	2016	620
10486	2016	619
5817	2016	618
28805	2018	618
27082	2018	618
25214	2017	618
486	2018	615
16492	2016	615
13361	2017	614
15685	2017	614
29649	2017	613
11552	2018	613
7862	2017	613
26228	2016	613
10356	2016	613
26397	2015	613
25463	2016	612
13985	2017	612
27987	2018	611
3162	2017	611
5530	2015	610
34315	2018	610
9851	2017	610
2437	2018	610
22978	2017	610
36763	2018	609
16998	2018	609
27152	2017	609
5272	2016	609
11980	2018	609
13768	2018	608
2030	2016	608
27962	2018	607
23346	2018	606
29317	2018	606
16372	2016	605
8540	2015	605
6566	2016	604
3479	2017	604
6586	2016	604
33725	2018	603
36500	2018	603
7846	2017	603
10047	2017	603
9406	2018	602
28840	2018	602
2172	2018	601
13336	2018	600
28645	2017	600
34715	2018	600
7051	2018	600
7542	2017	600
2316	2018	600
16416	2016	600
30956	2016	600
12533	2018	599
29350	2018	599
10920	2018	599
8318	2016	598
9243	2018	598
33033	2018	598
7326	2017	598
4463	2017	597
28793	2018	597
16311	2016	597
8878	2018	597
11716	2018	596
10722	2014	595
24789	2018	595
8752	2014	595
11393	2017	594
5195	2015	594
9403	2018	593
11566	2018	593
18273	2015	592
5725	2014	592
28792	2018	591
35336	2018	590
28610	2018	590
5282	2016	590
30395	2018	590
27319	2017	590
8520	2015	590
8131	2016	590
24735	2018	590
8792	2014	590
4276	2017	590
30908	2017	589
20546	2018	589
7177	2018	589
7772	2017	588
9928	2017	588
6950	2017	588
15086	2017	588
26103	2016	588
28692	2016	588
9735	2017	587
36432	2018	587
1663	2018	586
34605	2018	586
13998	2018	586
8250	2016	586
37303	2018	585
2511	2018	585
25408	2017	585
17576	2018	585
33822	2018	585
31759	2018	585
2652	2018	585
8386	2016	585
14224	2017	585
30373	2018	585
8476	2016	584
7029	2018	584
3088	2018	584
3957	2017	583
8530	2015	583
8184	2016	583
35986	2018	583
1845	2018	582
5240	2016	582
5732	2014	582
15714	2017	581
11641	2018	581
31188	2018	581
3847	2017	581
30294	2018	581
8484	2015	580
25909	2016	580
4792	2016	580
8186	2016	579
6724	2015	579
15129	2017	579
17787	2015	578
25869	2015	577
2922	2018	577
2946	2018	576
6252	2017	576
28452	2016	576
31969	2018	576
9858	2017	576
1926	2018	575
18016	2018	575
7398	2017	574
21833	2016	573
8839	2013	573
10540	2015	573
4462	2017	572
11145	2017	572
5238	2016	571
13194	2018	571
2491	2018	571
19299	2015	571
28924	2017	571
17964	2018	571
5759	2014	570
7848	2017	570
27929	2018	570
29014	2016	570
6303	2016	569
16468	2016	569
2217	2018	569
8563	2015	569
16426	2016	569
1711	2018	568
27509	2015	568
3881	2017	567
1615	2018	567
29857	2016	567
4448	2017	567
2968	2018	567
9727	2017	567
4861	2016	566
35855	2018	566
13982	2018	565
23728	2017	565
15756	2017	565
11483	2016	565
30805	2017	565
4256	2017	565
35853	2018	564
9419	2018	564
38792	2016	564
29412	2018	564
27261	2017	563
17890	2018	563
13305	2018	563
13431	2018	563
26733	2018	562
15875	2017	562
17699	2017	562
7366	2017	562
27482	2016	562
8561	2015	562
15179	2017	561
2849	2018	561
36946	2018	560
24867	2018	559
4330	2017	559
8453	2016	559
7573	2017	558
16316	2016	558
28601	2017	558
36078	2018	556
6991	2018	556
35403	2018	556
22639	2017	555
32310	2018	555
31426	2018	555
2029	2018	554
32111	2018	553
3714	2017	552
24659	2018	552
26379	2014	552
23808	2017	552
8390	2016	552
4097	2017	551
9693	2016	551
14681	2017	551
14190	2017	551
9840	2017	551
9213	2018	551
35710	2018	550
5001	2016	550
2536	2018	550
34584	2018	550
11029	2018	550
13347	2018	549
37027	2018	548
31839	2018	548
14461	2017	548
9195	2018	547
9830	2017	547
8073	2016	547
3844	2016	547
8445	2016	546
5021	2016	546
6843	2017	546
25204	2017	546
32155	2018	546
32193	2018	546
13696	2017	545
28589	2018	545
24492	2018	545
10062	2017	545
7938	2017	545
29012	2016	545
29242	2018	544
26900	2018	544
12237	2018	544
7588	2017	544
27241	2017	544
8232	2016	544
29034	2015	544
6721	2015	544
3499	2017	543
34995	2018	543
28715	2016	542
34456	2018	542
18821	2017	542
4687	2017	542
21572	2017	541
36154	2018	541
26735	2018	541
9800	2017	540
1951	2018	540
1879	2018	540
12035	2018	540
10717	2014	540
4483	2017	540
20587	2018	540
15649	2017	539
30281	2018	539
22699	2017	538
22903	2017	538
8222	2016	538
5043	2016	538
30160	2018	537
16207	2016	537
7045	2018	537
6686	2016	537
12033	2017	537
18535	2018	537
22397	2018	537
29746	2017	536
21670	2017	536
7712	2016	536
38743	2016	536
30364	2018	535
16134	2016	535
17238	2017	535
2000	2017	535
8338	2016	535
7727	2017	535
10118	2017	535
3731	2017	535
6776	2018	534
36855	2018	534
26531	2014	534
19397	2015	534
7533	2017	534
6390	2017	534
3719	2017	534
7068	2018	533
22301	2017	533
2433	2018	533
7788	2016	533
19856	2017	532
5200	2016	532
24295	2018	532
4241	2017	532
21278	2018	531
36275	2018	531
34915	2018	531
2333	2018	530
28941	2017	530
7937	2017	530
29247	2018	529
7497	2017	529
38709	2017	529
11999	2018	528
4348	2016	528
15250	2017	528
2337	2018	527
21989	2018	527
27052	2018	527
6605	2016	527
10492	2015	527
36530	2018	527
13805	2018	526
2280	2018	526
5025	2016	526
35028	2018	526
21003	2018	526
4339	2017	526
35775	2018	526
6142	2017	525
16344	2016	525
7106	2018	525
24333	2017	525
3284	2018	524
14360	2016	524
34716	2018	524
7903	2016	523
3305	2017	523
4288	2017	523
7484	2017	523
4142	2017	523
31375	2018	522
7830	2016	522
11448	2016	522
33465	2018	522
4436	2017	521
8628	2015	521
10454	2016	521
15958	2016	520
3599	2017	520
1930	2018	520
18433	2018	520
8033	2016	519
33246	2018	519
2943	2018	519
4538	2017	519
34575	2018	519
29455	2018	519
35831	2018	519
9502	2017	518
25729	2017	518
3585	2017	518
9144	2018	518
30916	2017	518
7012	2018	517
8205	2016	517
25993	2016	517
11722	2018	517
15147	2017	517
12682	2018	517
30969	2016	516
12406	2018	516
22809	2017	515
24870	2018	515
14169	2017	515
7110	2018	514
14022	2017	514
8252	2016	514
30534	2017	514
31967	2018	514
1635	2018	514
15134	2017	514
27722	2015	514
8081	2016	514
15183	2017	514
23177	2016	514
15849	2017	513
31898	2018	513
10248	2016	513
8660	2015	513
15687	2017	513
14456	2017	512
26821	2018	512
34666	2018	512
7495	2016	512
25058	2017	511
28812	2018	511
25343	2017	510
6656	2016	510
1681	2017	510
20102	2018	510
27275	2017	510
15996	2016	510
10488	2016	510
36600	2018	509
19181	2016	509
11052	2018	509
13957	2018	509
25955	2016	508
5194	2016	507
2879	2018	507
1659	2018	506
23207	2015	506
34703	2018	506
26694	2018	506
8496	2016	506
23309	2018	505
7813	2017	505
7794	2016	505
32679	2018	505
8593	2015	505
28504	2015	505
5327	2016	505
2098	2018	504
16611	2015	504
9323	2018	504
33891	2018	504
7999	2017	504
33643	2018	504
2148	2018	504
32216	2018	504
36568	2018	504
32805	2018	503
18719	2017	503
14067	2017	503
2961	2018	503
8074	2016	503
19720	2018	503
16642	2014	502
33849	2018	502
14946	2017	502
33836	2018	502
4062	2017	502
12068	2018	502
5324	2015	501
12717	2017	501
13322	2018	501
27061	2018	501
18107	2017	500
8651	2015	500
28856	2018	500
4181	2017	500
28858	2018	500
12459	2018	500
6823	2018	500
26195	2016	500
33813	2018	500
15156	2016	500
6850	2018	500
35377	2018	500
14900	2015	499
15829	2016	499
34520	2018	499
16471	2015	499
1316	2018	499
3207	2018	499
13359	2018	498
36210	2018	498
13871	2018	498
24249	2018	498
14638	2017	498
5232	2015	498
2068	2018	497
8834	2014	497
5223	2016	497
34585	2018	497
8111	2016	497
31974	2018	496
9890	2017	496
13876	2017	496
36115	2018	496
7763	2017	496
10308	2016	496
37024	2018	495
14123	2017	495
28821	2018	495
13632	2018	495
24151	2018	495
32995	2018	494
10730	2014	493
32174	2018	493
10192	2016	492
33235	2018	492
3288	2018	492
13183	2018	492
29024	2016	492
11990	2018	491
10333	2016	491
22395	2018	491
29207	2018	491
3762	2017	491
23188	2016	491
27439	2016	491
36383	2018	490
4758	2016	490
9252	2017	490
29755	2017	490
10309	2016	490
13682	2018	490
20868	2016	490
14029	2018	490
34937	2018	489
17513	2018	489
25559	2017	489
36668	2018	489
5514	2015	488
11104	2018	488
21433	2017	488
21583	2017	488
7791	2017	488
14901	2017	488
7685	2017	488
7924	2017	487
30037	2014	487
8460	2016	486
8728	2014	486
9435	2017	486
11900	2018	486
26140	2016	486
7351	2017	486
8064	2016	485
34066	2018	484
8586	2015	484
24061	2016	484
25957	2016	484
14307	2017	484
7278	2017	484
28336	2017	484
6491	2016	484
34446	2018	484
7838	2017	484
32647	2018	483
7826	2017	483
12722	2017	483
13690	2018	483
9318	2018	483
23422	2018	483
35727	2018	482
15236	2017	482
9085	2018	482
30371	2018	482
6318	2017	482
28486	2016	482
24991	2017	482
37311	2018	482
31957	2018	481
9992	2017	481
4921	2015	481
30598	2017	481
27700	2017	480
15352	2017	480
27521	2014	480
11936	2018	480
29120	2018	479
3217	2018	479
6259	2017	479
13939	2018	479
2750	2018	479
9636	2017	479
9611	2017	479
1921	2018	478
3402	2018	478
30648	2017	478
16239	2016	478
11308	2017	478
1621	2018	477
4590	2017	477
16338	2016	477
7200	2017	477
28632	2017	477
32423	2018	477
6775	2018	477
14015	2017	477
23382	2018	477
21471	2017	476
26836	2018	476
11193	2017	476
10164	2017	475
9415	2018	475
4997	2016	474
18927	2017	474
7490	2017	474
3991	2017	474
36985	2018	474
36259	2018	474
37033	2018	474
31758	2018	473
32605	2018	473
25467	2017	473
2565	2018	473
8135	2016	473
14905	2017	472
5104	2016	472
28984	2016	472
7899	2017	472
5478	2015	472
8171	2016	472
10197	2016	472
7178	2017	472
3688	2017	471
17208	2017	471
26335	2015	471
32690	2018	471
1856	2018	470
13987	2018	470
27079	2018	470
1779	2018	470
17697	2018	470
7130	2018	470
28598	2018	470
1936	2018	470
34893	2018	469
32736	2018	469
3105	2018	469
15410	2017	469
4826	2016	469
2259	2018	468
5008	2016	468
12881	2018	468
15709	2017	468
9303	2018	468
36988	2018	467
31365	2018	467
27127	2018	467
30369	2018	467
19494	2018	467
6523	2016	467
4344	2017	467
3167	2017	467
36714	2018	466
23776	2017	466
36401	2018	466
9570	2017	466
3876	2017	466
10278	2016	466
34880	2018	465
29987	2016	465
5172	2016	465
19425	2014	465
8331	2016	465
17796	2013	465
14346	2017	465
8300	2016	464
29799	2017	464
15125	2017	464
12136	2018	464
27894	2018	463
15888	2016	463
35628	2018	463
20866	2016	463
17332	2018	463
17779	2015	463
25537	2016	463
23217	2015	462
13669	2018	462
24902	2018	462
14131	2017	462
2429	2018	462
5693	2014	462
33023	2018	462
24859	2018	462
1648	2017	461
15159	2017	461
5588	2015	461
23891	2017	461
35933	2018	461
12864	2018	461
24568	2018	460
36795	2018	460
26168	2016	460
8158	2016	460
35009	2018	459
26933	2018	459
6379	2017	459
23967	2017	459
1535	2017	459
28371	2017	459
9752	2017	459
34259	2018	458
13478	2018	458
2343	2018	457
34065	2018	457
7860	2017	457
15262	2017	457
16612	2015	457
23925	2017	457
19119	2017	457
34837	2018	456
16524	2015	456
29669	2017	456
4149	2017	456
4652	2016	455
5030	2016	455
9344	2017	455
32315	2018	455
12893	2018	455
11130	2017	455
16124	2014	454
12548	2018	454
14822	2017	454
33120	2018	454
3668	2017	454
24390	2018	454
34936	2018	453
1893	2018	453
3772	2017	453
8630	2015	453
26421	2015	453
35876	2018	453
7796	2017	453
32694	2018	453
11365	2017	453
16450	2016	453
10203	2016	453
9225	2018	452
12837	2018	452
13186	2018	452
4681	2017	452
7540	2017	452
4405	2017	452
10426	2015	451
4044	2017	451
25573	2016	451
2610	2018	451
36642	2018	451
34720	2018	451
6783	2018	451
7025	2018	451
4468	2017	451
12925	2018	451
5798	2018	451
36747	2018	451
22507	2018	451
514	2018	450
11322	2017	450
18052	2018	450
7900	2016	450
27229	2017	450
8606	2015	449
9512	2017	449
35743	2018	449
8493	2016	449
25128	2017	449
7395	2017	449
2306	2018	449
25494	2016	448
7434	2017	448
28852	2018	448
28783	2018	448
6264	2016	448
6811	2018	448
15492	2016	448
3562	2017	447
26444	2014	447
5191	2016	447
4130	2017	447
1576	2017	447
2281	2018	446
1943	2017	446
31135	2015	446
3441	2018	446
12524	2017	446
31316	2018	446
22720	2017	446
28290	2017	446
4065	2017	446
27344	2017	446
10185	2016	445
2725	2018	445
14089	2017	445
21010	2018	445
36615	2018	445
7596	2016	444
10606	2015	444
5284	2016	444
5425	2014	444
27709	2017	444
2464	2018	444
6911	2018	444
27777	2017	443
11488	2016	443
10223	2016	443
16237	2016	443
2262	2018	442
10125	2017	442
4778	2016	442
7671	2017	442
8564	2015	442
12353	2018	442
28408	2016	442
7664	2017	442
15289	2017	441
20486	2016	441
12116	2018	441
13240	2018	441
18409	2018	441
3482	2017	441
32998	2018	441
2500	2018	440
13422	2017	440
2294	2017	440
10814	2018	440
6828	2017	440
23880	2017	440
4443	2017	440
29512	2017	440
7420	2017	440
20997	2018	440
29149	2017	439
13266	2017	439
31602	2018	439
30541	2017	439
28678	2017	439
27085	2018	439
19847	2017	439
21052	2018	439
8115	2016	439
4119	2017	439
35820	2018	439
28081	2018	439
14808	2017	438
34211	2018	438
1685	2018	438
4621	2017	438
13968	2018	438
7722	2017	438
9138	2018	438
11550	2018	438
8784	2014	437
6265	2017	437
12498	2018	437
4586	2017	437
29469	2018	436
8210	2016	436
5288	2016	436
27031	2018	436
3603	2017	436
23838	2017	436
8646	2015	435
18973	2017	435
30624	2017	435
7600	2017	435
4329	2017	435
3180	2018	435
14553	2017	435
3521	2017	434
36762	2018	434
13152	2018	434
4565	2017	434
20800	2017	434
32156	2018	434
1942	2018	434
34771	2018	433
36616	2018	433
4493	2017	433
7547	2017	433
7995	2017	433
3673	2017	433
26172	2016	433
7923	2017	432
24968	2018	432
22418	2018	432
15852	2017	432
5110	2016	432
22723	2017	432
32580	2018	431
[truncated: 35,564 more rows]
