# Supplementary material for: Tracking the popularity and outcomes of all bioRxiv preprints
Source: eLife journal article supplement (doi:10.7554/elife.45133), 2019-04-24
Supplement: supp [file elife-45133-supp-v1.zip › elife_poa_e45133_Figure_2_figure_supplement_3_source_data_3.csv]

id	year	downloads
14036	2017	108326
6917	2018	46210
21370	2016	31021
6985	2018	29701
19809	2018	25540
3421	2017	21613
13080	2018	19490
7960	2017	14855
22539	2018	12234
6959	2016	11036
34593	2018	10065
6951	2018	8749
2225	2018	8567
11935	2018	8178
22348	2017	8055
18110	2017	8012
2367	2017	7958
7390	2017	7643
13168	2018	7632
9431	2018	7608
3107	2018	7504
7222	2017	7151
28654	2016	6894
3300	2018	6600
13001	2018	6440
2916	2018	6407
6457	2017	6166
3939	2017	5994
13012	2018	5981
24852	2018	5972
1994	2018	5875
1957	2018	5851
13873	2017	5744
37420	2018	5546
11930	2018	5485
16804	2018	5470
2983	2018	5466
1782	2017	5356
5201	2016	5315
19726	2017	5190
21328	2018	5177
10661	2015	5170
21200	2018	5137
10078	2017	5100
24790	2018	5075
20741	2016	5030
7629	2017	4994
1905	2018	4970
3493	2017	4959
13568	2018	4892
9821	2017	4865
13884	2018	4660
4573	2017	4597
29212	2017	4592
27470	2016	4563
1983	2018	4561
6933	2018	4546
3294	2018	4526
9684	2017	4505
9818	2017	4484
5665	2014	4454
34156	2018	4374
2012	2018	4360
35794	2018	4313
7538	2017	4267
27067	2018	4214
14214	2017	4159
17194	2017	4155
3481	2017	4139
1441	2018	4081
9487	2017	4065
6905	2018	4053
20576	2018	4050
9056	2018	4043
2392	2017	4037
4960	2015	4014
12226	2018	3986
18231	2016	3890
30260	2018	3844
3471	2018	3819
9228	2018	3809
2547	2017	3782
18337	2018	3762
27258	2017	3761
16272	2016	3754
10776	2018	3750
2891	2018	3726
7971	2017	3723
22570	2017	3710
28567	2018	3703
7801	2017	3678
569	2018	3673
1840	2017	3668
7455	2017	3666
9933	2017	3642
9325	2018	3637
14303	2017	3602
31804	2018	3598
19502	2018	3597
12525	2017	3584
9322	2017	3566
12080	2018	3535
13100	2018	3535
28706	2016	3534
9313	2018	3527
1621	2018	3494
9373	2018	3482
10771	2018	3480
1596	2018	3471
2242	2018	3463
7834	2017	3437
3330	2018	3434
7029	2018	3425
3857	2017	3394
11611	2018	3380
31862	2018	3377
13513	2018	3327
12492	2018	3324
12826	2018	3320
28793	2018	3314
28259	2017	3294
22191	2018	3288
13420	2018	3287
21531	2017	3260
22224	2018	3217
5324	2015	3205
37097	2018	3201
17949	2017	3186
13032	2018	3173
7786	2017	3171
21428	2017	3160
2029	2018	3151
7032	2017	3138
31486	2018	3127
29414	2018	3108
28565	2018	3088
15330	2017	3058
3437	2017	3043
9408	2018	3039
33940	2018	3034
17238	2017	3022
23574	2018	3009
8899	2018	2993
2002	2018	2973
14019	2018	2953
22064	2018	2924
30003	2016	2914
4675	2016	2913
29350	2018	2881
20515	2017	2869
28609	2018	2864
1752	2018	2846
32683	2018	2843
20210	2018	2823
30492	2018	2808
17549	2018	2805
28816	2018	2799
16066	2016	2796
7308	2017	2795
13874	2017	2791
17992	2017	2774
7469	2017	2758
9630	2017	2757
36545	2018	2740
29190	2018	2737
35104	2018	2731
33080	2018	2708
9516	2017	2705
6955	2018	2697
12125	2018	2692
8963	2018	2689
28556	2018	2682
18864	2016	2676
15156	2016	2659
6847	2018	2656
28971	2017	2654
10357	2016	2651
19040	2017	2646
3844	2016	2644
6828	2017	2635
14649	2017	2634
9524	2017	2634
28608	2017	2630
4149	2017	2628
9237	2016	2611
7182	2018	2611
27360	2017	2601
8936	2017	2601
10561	2015	2601
7316	2017	2598
24431	2018	2597
20461	2018	2591
26808	2018	2587
3550	2017	2584
8228	2016	2581
28835	2018	2576
20086	2018	2570
35353	2018	2557
7106	2018	2555
3521	2017	2548
31552	2018	2547
7215	2017	2544
35295	2018	2543
11145	2017	2541
2779	2017	2530
30339	2018	2520
3042	2016	2514
26851	2018	2509
3528	2017	2504
7062	2018	2504
1859	2018	2501
1965	2018	2498
1329	2018	2473
12212	2018	2468
26243	2015	2466
2719	2018	2465
2217	2018	2459
22378	2018	2442
7110	2018	2435
7421	2017	2431
14952	2017	2429
15377	2017	2429
35822	2018	2426
3412	2018	2426
3866	2017	2424
15114	2016	2424
8312	2016	2420
3441	2018	2419
21055	2018	2414
2429	2018	2412
3762	2017	2408
2922	2018	2404
28634	2017	2403
1898	2018	2401
2907	2017	2396
15687	2017	2394
1796	2018	2372
12784	2018	2372
14689	2017	2371
30351	2018	2369
19738	2018	2367
32792	2018	2366
28775	2018	2363
28604	2018	2356
21626	2017	2352
22277	2018	2352
29092	2018	2344
14225	2017	2335
22234	2018	2335
1921	2018	2320
7484	2017	2318
25023	2017	2316
23291	2018	2295
17956	2018	2289
28611	2018	2288
29381	2018	2288
19840	2017	2275
2084	2018	2262
1591	2018	2255
13817	2018	2254
2022	2017	2245
28788	2018	2237
13510	2018	2236
21581	2017	2230
9437	2018	2224
32689	2018	2222
6950	2017	2222
14123	2017	2222
7783	2017	2219
9400	2017	2208
4097	2017	2206
7158	2018	2204
2433	2018	2203
6986	2017	2202
8867	2018	2200
3479	2017	2197
3122	2018	2178
18036	2018	2173
14427	2017	2167
9353	2018	2165
9144	2018	2161
2921	2017	2160
3962	2017	2158
7763	2017	2153
2026	2018	2150
7200	2017	2147
5832	2018	2140
21855	2015	2136
21423	2017	2129
12533	2018	2126
1881	2018	2122
28586	2018	2117
9731	2017	2115
20102	2018	2114
3354	2018	2109
33204	2018	2104
7395	2017	2101
3226	2018	2094
1448	2016	2094
18719	2017	2086
2277	2018	2078
3305	2017	2074
8307	2016	2072
9390	2018	2070
2284	2017	2065
1951	2018	2056
4669	2017	2055
19257	2016	2053
11316	2017	2040
12941	2018	2038
3108	2018	2037
14736	2017	2028
16948	2018	2019
16998	2018	2018
31767	2018	2017
20524	2018	2016
30202	2018	2014
2017	2018	2010
27063	2018	2009
10945	2018	2001
33199	2018	1997
3043	2017	1995
28802	2018	1994
30427	2018	1990
27816	2018	1989
7239	2017	1988
9159	2017	1985
35726	2018	1984
13361	2017	1981
6823	2018	1978
6857	2018	1976
2544	2018	1976
13339	2018	1975
13764	2018	1967
7117	2017	1964
2536	2018	1962
16344	2016	1962
30364	2018	1960
5861	2017	1959
13876	2017	1958
17964	2018	1952
12599	2018	1951
7007	2017	1950
1648	2017	1937
20979	2017	1937
13738	2018	1935
13768	2018	1926
6808	2018	1924
9732	2016	1921
3402	2018	1918
2006	2018	1917
31246	2018	1916
2798	2018	1915
12717	2017	1910
11641	2018	1909
32983	2018	1907
23720	2017	1907
2693	2018	1904
29961	2016	1903
8863	2018	1903
1927	2018	1899
4439	2016	1889
24735	2018	1884
13828	2018	1881
24367	2018	1880
28805	2018	1878
3448	2018	1877
32686	2018	1877
9054	2018	1875
13191	2018	1874
34992	2018	1874
12237	2018	1873
22089	2018	1872
17697	2018	1870
29397	2018	1869
4175	2017	1852
9403	2018	1851
27054	2017	1850
24493	2018	1848
30160	2018	1843
21561	2017	1838
28726	2015	1837
1645	2017	1836
33553	2018	1835
13539	2018	1831
33371	2018	1827
23561	2018	1824
13567	2018	1824
3787	2017	1822
15241	2016	1816
3004	2018	1816
8548	2015	1815
28598	2018	1810
13923	2017	1809
32442	2018	1803
13690	2018	1801
2648	2018	1798
8804	2014	1794
8292	2016	1793
9406	2018	1792
2914	2018	1792
12722	2017	1790
18052	2018	1788
7124	2018	1785
22397	2018	1783
3183	2017	1782
11989	2018	1781
32108	2018	1776
2234	2017	1773
4493	2017	1770
7000	2017	1770
1809	2018	1769
26853	2018	1768
11744	2018	1768
9840	2017	1765
7178	2017	1762
7177	2018	1752
29130	2018	1751
9354	2018	1749
31979	2018	1745
1281	2018	1745
27284	2017	1744
6969	2018	1740
24325	2018	1739
23769	2017	1738
1779	2018	1738
27777	2017	1735
13185	2018	1732
20546	2018	1729
3162	2017	1729
29455	2018	1727
7051	2018	1724
7352	2017	1724
22562	2017	1724
3891	2017	1709
1711	2018	1698
11043	2018	1697
22934	2017	1695
31605	2018	1692
24778	2017	1690
2468	2018	1689
24998	2017	1686
18359	2018	1683
7657	2017	1681
33844	2018	1681
11992	2018	1680
20501	2018	1679
3443	2018	1676
20541	2018	1673
34464	2018	1673
2262	2018	1672
27987	2018	1670
22764	2017	1670
1930	2018	1668
3599	2017	1667
21583	2017	1665
1910	2018	1664
30436	2018	1664
3296	2018	1664
26849	2018	1655
3444	2018	1653
21108	2018	1652
28550	2018	1650
23536	2018	1647
11388	2017	1643
9195	2018	1642
4348	2016	1642
17450	2018	1640
18927	2017	1639
1588	2018	1638
12222	2017	1636
9243	2018	1634
9057	2018	1633
1939	2018	1632
9330	2018	1630
9270	2018	1629
21003	2018	1627
5737	2014	1624
12682	2018	1623
3814	2017	1622
6831	2018	1622
1576	2017	1619
8091	2016	1616
29242	2018	1612
1856	2018	1610
24615	2017	1607
3751	2017	1606
10657	2015	1603
19816	2017	1603
10694	2014	1603
29247	2018	1603
34312	2018	1601
9428	2017	1600
18185	2017	1599
13183	2018	1598
33211	2018	1596
3881	2017	1593
12131	2018	1592
1981	2018	1592
21520	2017	1592
9290	2018	1586
27149	2017	1586
7068	2018	1584
24784	2017	1583
3336	2018	1581
1629	2018	1580
22978	2017	1577
26900	2018	1577
10926	2018	1577
28840	2018	1573
30281	2018	1569
2840	2018	1569
7071	2018	1567
14605	2017	1566
6982	2018	1564
33843	2018	1559
12635	2018	1558
2027	2018	1554
9435	2017	1553
3088	2018	1550
16568	2015	1550
8822	2014	1549
7755	2017	1548
17475	2018	1548
13309	2018	1547
13656	2018	1545
27079	2018	1537
1683	2018	1537
25468	2016	1536
22818	2017	1534
34939	2018	1534
10068	2017	1531
5681	2014	1525
11291	2017	1524
2395	2018	1524
28638	2016	1522
29943	2016	1521
7399	2017	1520
33015	2018	1519
7871	2017	1519
32115	2018	1518
31707	2018	1518
33486	2018	1516
22772	2017	1514
28812	2018	1513
35347	2018	1512
22960	2017	1511
11037	2018	1510
28625	2017	1504
14190	2017	1503
31058	2016	1502
14507	2017	1498
17513	2018	1497
627	2018	1497
24849	2018	1496
3594	2017	1495
2664	2018	1495
2813	2018	1494
14388	2017	1491
3288	2018	1491
9419	2018	1487
36973	2018	1486
28985	2016	1486
1845	2018	1485
3817	2017	1485
2968	2018	1484
24876	2018	1482
7223	2017	1481
21075	2017	1481
2612	2018	1481
7792	2015	1479
15200	2017	1478
7796	2017	1477
12196	2018	1477
22784	2017	1476
12068	2018	1475
24699	2018	1474
7533	2017	1474
30336	2018	1474
9199	2018	1473
2691	2018	1471
24773	2018	1470
29234	2018	1470
29409	2018	1464
24762	2017	1464
14583	2017	1463
28852	2018	1456
9268	2017	1456
3849	2017	1456
10006	2017	1455
9303	2018	1446
9177	2018	1444
7728	2017	1443
1936	2018	1442
7074	2016	1441
7716	2017	1441
13192	2018	1441
2389	2018	1439
12033	2017	1439
12401	2018	1438
23709	2017	1436
2860	2018	1436
9039	2017	1436
36084	2018	1436
7165	2017	1435
32898	2018	1435
12870	2018	1433
33083	2018	1432
6899	2018	1431
34117	2018	1430
9318	2018	1429
2450	2018	1427
27048	2018	1427
3719	2017	1425
2994	2017	1424
17472	2018	1424
36964	2018	1422
7433	2017	1422
23309	2018	1420
13911	2017	1420
7661	2017	1419
19948	2017	1419
3750	2017	1419
14901	2017	1418
4567	2016	1415
28136	2017	1415
2491	2018	1414
12730	2018	1413
9552	2017	1413
9841	2017	1411
17687	2018	1408
3603	2017	1407
2898	2018	1407
1933	2018	1404
20150	2016	1403
9166	2018	1402
24724	2017	1398
7063	2018	1398
1950	2018	1397
22474	2018	1396
28792	2018	1396
7495	2016	1395
4294	2017	1394
7408	2017	1394
3278	2018	1394
13258	2018	1392
32687	2018	1392
22507	2018	1391
18118	2017	1391
3027	2017	1389
29512	2017	1388
14067	2017	1386
22840	2017	1385
3015	2018	1385
3000	2018	1382
7060	2018	1382
14029	2018	1379
22296	2018	1378
13050	2018	1378
1816	2018	1378
3614	2017	1378
2844	2018	1376
36477	2018	1375
5385	2015	1374
29248	2018	1373
7101	2018	1372
4339	2017	1370
12655	2017	1368
17020	2018	1368
19574	2018	1367
3105	2018	1367
24659	2018	1366
29412	2018	1361
1537	2017	1358
24799	2018	1357
5651	2014	1357
9415	2018	1356
24902	2018	1351
27062	2018	1349
12318	2018	1348
9464	2017	1347
7079	2017	1346
17215	2017	1345
1453	2018	1342
7069	2018	1341
1461	2018	1340
20078	2017	1339
20587	2018	1339
483	2018	1339
13632	2018	1338
34197	2018	1336
3482	2017	1336
2316	2018	1336
2098	2018	1332
30175	2017	1331
17530	2018	1330
11543	2018	1328
1822	2017	1328
36648	2018	1326
5461	2015	1325
17907	2018	1325
28877	2017	1324
20521	2018	1323
18532	2018	1323
32192	2018	1322
1842	2018	1320
22301	2017	1320
3341	2016	1320
29207	2018	1320
2786	2018	1319
31426	2018	1317
7837	2017	1316
33862	2018	1316
24870	2018	1314
2961	2018	1314
5081	2016	1312
17526	2018	1311
5817	2016	1311
3350	2018	1309
24344	2018	1308
6821	2018	1307
9102	2018	1306
14022	2017	1305
23326	2018	1305
7058	2018	1304
32103	2018	1304
6438	2017	1303
3507	2017	1303
29386	2018	1299
526	2018	1299
25500	2017	1298
30495	2018	1298
14186	2017	1297
3499	2017	1296
22935	2017	1296
3673	2017	1295
11742	2018	1295
14638	2017	1294
11154	2017	1292
18433	2018	1292
12459	2018	1291
1337	2018	1286
21212	2017	1285
14691	2017	1285
12337	2018	1285
29799	2017	1284
24381	2017	1283
17039	2018	1282
2661	2018	1282
9150	2018	1282
25260	2017	1282
8405	2016	1281
7448	2017	1281
9136	2018	1278
5488	2015	1277
2988	2018	1277
20677	2017	1276
26789	2018	1274
2676	2016	1274
27061	2018	1273
3610	2017	1272
13359	2018	1272
35325	2018	1272
1421	2018	1271
1943	2017	1271
13255	2018	1271
9462	2017	1270
15147	2017	1268
22177	2018	1268
2946	2018	1267
2222	2018	1267
8355	2015	1265
3314	2017	1263
34807	2018	1262
3585	2017	1261
2172	2018	1258
31188	2018	1258
21572	2017	1258
7130	2018	1257
13070	2018	1256
30823	2017	1256
32688	2018	1255
30248	2018	1255
27962	2018	1254
7366	2017	1254
26735	2018	1252
11149	2017	1250
26897	2018	1250
34669	2018	1249
18400	2018	1249
11998	2018	1249
28744	2018	1248
4196	2017	1247
7025	2018	1246
1724	2018	1245
2218	2018	1244
29467	2018	1244
23404	2018	1243
11990	2018	1240
22572	2017	1240
36388	2018	1239
7926	2017	1239
9085	2018	1236
13938	2017	1236
24869	2018	1236
12699	2018	1235
29215	2018	1234
3291	2018	1233
9126	2018	1229
9547	2017	1228
13067	2018	1227
11590	2018	1225
23593	2017	1225
4067	2017	1225
13957	2018	1225
22554	2017	1225
2511	2018	1223
7957	2017	1223
24767	2018	1219
8728	2014	1219
9083	2018	1218
26898	2018	1218
11130	2017	1217
17390	2018	1216
3373	2017	1215
9225	2018	1215
4865	2016	1214
10814	2018	1214
7797	2017	1213
3335	2017	1212
8993	2018	1212
14899	2016	1212
6964	2018	1207
30534	2017	1207
31321	2018	1206
21807	2016	1204
5798	2018	1204
1663	2018	1203
13305	2018	1203
6776	2018	1203
23694	2017	1203
7934	2017	1202
24867	2018	1202
27224	2017	1201
12925	2018	1199
7545	2017	1197
32235	2018	1195
16826	2018	1192
22567	2017	1192
35947	2018	1191
2790	2018	1190
21931	2018	1189
11900	2018	1189
2850	2017	1189
17890	2018	1187
15887	2017	1187
17576	2018	1187
20639	2017	1186
4274	2016	1186
18299	2018	1185
24257	2018	1185
20443	2015	1185
27082	2018	1184
9699	2017	1184
10190	2016	1184
13719	2018	1183
12209	2018	1182
7149	2017	1182
3579	2017	1182
1499	2018	1182
3356	2017	1181
14386	2017	1180
6961	2018	1180
21241	2018	1180
21052	2018	1180
4826	2016	1179
21104	2018	1178
31602	2018	1178
1702	2018	1178
7012	2018	1178
36045	2018	1176
34410	2018	1176
1634	2017	1176
1860	2018	1175
34130	2018	1173
2239	2018	1173
13008	2018	1172
27138	2018	1172
2280	2018	1170
22209	2018	1170
34855	2018	1169
17999	2018	1168
32179	2018	1167
34907	2018	1166
13976	2017	1166
9883	2017	1164
24444	2018	1164
13871	2018	1162
35958	2018	1160
3179	2018	1160
34162	2018	1159
3283	2017	1158
7675	2017	1157
30758	2017	1157
12366	2018	1156
2461	2018	1156
4044	2017	1154
12520	2018	1153
1619	2018	1152
1964	2017	1152
12353	2018	1152
28049	2018	1152
3097	2018	1151
8921	2018	1151
9414	2018	1148
12935	2018	1148
29317	2018	1147
14822	2017	1147
32644	2018	1146
4810	2016	1145
1694	2018	1144
8466	2016	1144
2986	2016	1143
28618	2018	1143
24333	2017	1142
26804	2017	1142
19558	2017	1141
7169	2018	1140
2333	2018	1140
4289	2017	1140
4795	2016	1138
3120	2018	1137
9501	2017	1137
6947	2018	1134
13726	2018	1133
7489	2017	1133
21485	2017	1132
24459	2018	1131
13524	2018	1130
2577	2018	1130
13347	2018	1127
7103	2017	1127
11264	2017	1127
9502	2017	1126
31277	2018	1126
4100	2017	1125
9600	2017	1125
7294	2017	1124
31937	2018	1124
2943	2018	1123
30244	2018	1123
2586	2017	1122
24911	2017	1122
31936	2018	1121
29469	2018	1121
17332	2018	1117
4487	2017	1116
28658	2017	1116
29576	2017	1116
13186	2018	1115
2322	2018	1115
3572	2017	1115
17640	2017	1114
33935	2018	1111
33315	2018	1111
2680	2018	1110
19683	2018	1109
13217	2018	1109
30315	2018	1109
3080	2018	1109
32568	2018	1108
3207	2018	1108
35777	2018	1107
2315	2018	1107
13682	2018	1107
32933	2018	1107
9104	2017	1107
22430	2018	1107
22395	2018	1106
3326	2018	1106
27917	2018	1106
26718	2018	1106
7108	2018	1105
22785	2017	1103
2240	2018	1103
18515	2018	1103
29600	2017	1102
3777	2017	1101
1903	2018	1100
13385	2018	1100
1369	2018	1099
31241	2018	1098
29594	2017	1098
18016	2018	1096
3461	2018	1096
20140	2017	1095
28589	2018	1095
2525	2018	1095
2924	2017	1095
2551	2018	1094
3831	2017	1092
18058	2018	1091
3415	2018	1090
9486	2017	1090
13805	2018	1090
7133	2018	1089
7523	2017	1088
9229	2018	1088
23346	2018	1088
34627	2018	1088
29360	2017	1088
2849	2018	1087
27929	2018	1085
4494	2017	1085
27159	2017	1084
33246	2018	1084
34654	2018	1083
36088	2018	1081
21967	2017	1081
18186	2017	1080
19720	2018	1079
27085	2018	1079
30283	2018	1078
23287	2018	1077
30487	2018	1076
22699	2017	1075
10840	2018	1074
1316	2018	1073
3906	2017	1073
13917	2018	1071
19754	2018	1070
3426	2018	1070
28610	2018	1068
27031	2018	1068
11894	2018	1067
37153	2018	1066
26836	2018	1065
9596	2017	1064
15730	2017	1063
7402	2017	1062
2411	2018	1062
7486	2017	1061
1659	2018	1060
12724	2018	1059
30501	2018	1058
18677	2018	1057
5696	2014	1057
23582	2018	1056
30284	2018	1056
5284	2016	1055
37145	2018	1055
14905	2017	1053
13765	2018	1051
3209	2018	1051
21433	2017	1049
26743	2018	1049
32226	2018	1049
7738	2017	1048
486	2018	1046
25247	2017	1046
24249	2018	1045
7973	2017	1045
5101	2016	1045
14169	2017	1044
21301	2018	1044
2337	2018	1043
3151	2018	1042
22492	2018	1042
7527	2017	1041
9233	2018	1038
13194	2018	1037
2227	2017	1036
7424	2017	1035
35661	2018	1034
21989	2018	1034
3076	2018	1033
35740	2018	1033
34201	2018	1033
12612	2018	1032
3284	2018	1032
14113	2017	1032
13530	2017	1031
15333	2017	1029
21278	2018	1029
13943	2018	1028
5025	2016	1028
30541	2017	1027
30294	2018	1027
6991	2018	1026
20697	2017	1025
4237	2016	1025
13318	2018	1023
2000	2017	1023
1483	2018	1023
19899	2017	1023
23422	2018	1022
31365	2018	1021
21356	2018	1020
1731	2018	1019
9096	2018	1019
4330	2017	1018
29120	2018	1018
9008	2018	1017
1635	2018	1016
19848	2017	1016
2500	2018	1015
23469	2018	1014
32290	2018	1014
18199	2017	1014
13290	2017	1013
31759	2018	1013
31988	2018	1013
1709	2018	1012
15655	2016	1011
3847	2017	1011
14176	2017	1011
34540	2018	1011
2524	2018	1011
514	2018	1011
23697	2017	1010
12987	2018	1008
23240	2018	1008
7022	2018	1008
3262	2018	1006
5148	2016	1005
1893	2018	1004
3338	2018	1003
29595	2017	1003
4980	2016	1003
12152	2018	1002
18823	2018	1002
10920	2018	1001
13486	2018	999
3011	2017	998
10977	2017	998
23618	2018	998
10732	2013	996
10067	2017	996
30923	2017	996
2502	2017	996
6990	2017	995
22463	2018	995
7045	2018	995
21670	2017	994
22494	2018	993
13431	2018	993
4748	2016	992
2293	2018	991
3047	2017	991
7974	2017	990
3539	2017	990
29014	2016	990
33023	2018	989
24492	2018	989
30395	2018	989
12847	2018	988
24135	2017	988
1651	2018	988
29149	2017	987
3066	2018	986
12785	2018	986
7935	2017	986
14925	2017	985
30373	2018	984
30550	2017	984
12406	2018	984
12282	2018	983
2503	2017	982
30165	2017	982
29353	2018	980
2431	2018	979
12979	2017	979
26994	2018	978
12963	2018	978
14053	2017	977
1152	2018	976
33033	2018	976
11936	2018	976
7125	2018	975
7398	2017	975
12498	2018	975
13983	2018	975
2294	2017	974
17700	2018	973
3830	2017	973
22418	2018	972
28605	2017	972
11980	2018	972
35673	2018	971
11853	2018	971
639	2018	970
28856	2018	970
24151	2018	970
3003	2017	968
29844	2016	968
24345	2018	967
36725	2018	967
28015	2018	967
19707	2018	967
4142	2017	966
9429	2018	966
26694	2018	965
33120	2018	965
22169	2018	965
2463	2018	965
7995	2017	965
28673	2017	964
18633	2017	964
33959	2018	964
6968	2017	963
32246	2018	962
9647	2017	962
10667	2015	959
5891	2017	959
36571	2018	958
21000	2018	958
28081	2018	957
16777	2018	957
26733	2018	956
3589	2017	956
7624	2017	956
2905	2018	955
16928	2018	955
3246	2018	954
4569	2017	954
28050	2018	954
31229	2018	954
16328	2016	953
21169	2018	953
28854	2018	953
7845	2017	953
30437	2018	952
27127	2018	952
26903	2018	951
14700	2017	950
28839	2018	950
30192	2018	949
1615	2018	949
24295	2018	949
27052	2018	949
24434	2018	949
13152	2018	949
13897	2018	949
1125	2018	948
11559	2017	947
12944	2018	947
6849	2017	946
3297	2018	945
18605	2018	944
2827	2018	942
3238	2018	942
2652	2018	942
31206	2018	941
35377	2018	941
13511	2018	941
34298	2018	941
470	2018	940
5843	2018	939
12161	2018	939
23318	2018	937
18409	2018	937
1835	2018	936
7013	2017	935
24855	2018	935
11552	2018	935
30369	2018	934
9138	2018	933
3187	2018	933
35403	2018	931
1360	2018	930
22729	2017	929
13939	2018	929
36076	2018	929
25128	2017	929
38681	2017	929
18670	2018	928
22212	2018	928
11107	2018	928
12993	2018	928
5155	2016	927
20077	2017	926
30661	2017	926
13336	2018	926
3654	2017	926
23612	2018	926
30916	2017	926
10062	2017	926
27049	2018	926
18202	2017	926
13669	2018	925
35553	2018	924
13027	2017	924
13316	2018	924
28620	2018	923
22615	2017	923
1688	2018	923
24789	2018	922
18534	2018	921
3041	2018	920
22322	2018	919
6878	2018	919
28809	2018	918
6879	2018	918
11566	2018	917
2437	2018	916
21848	2015	915
30494	2018	915
21405	2018	915
21354	2018	914
9328	2018	914
6967	2018	914
30268	2017	913
23382	2018	913
4252	2017	912
7253	2017	912
14089	2017	912
29266	2018	912
1681	2017	911
12386	2018	910
34240	2018	910
13862	2018	910
2879	2018	909
4185	2017	908
35628	2018	908
9269	2018	907
31855	2018	906
13875	2018	905
37376	2018	905
13240	2018	904
21082	2018	903
30371	2018	903
38741	2016	902
4214	2017	902
7434	2017	902
5593	2015	902
30411	2018	902
8156	2016	901
4150	2017	900
35228	2018	900
12967	2018	900
34915	2018	898
33643	2018	896
11550	2018	896
29563	2017	894
1926	2018	894
14224	2017	894
3468	2018	894
1942	2018	893
17254	2017	893
1977	2018	892
28444	2016	892
35862	2018	891
8668	2015	891
31839	2018	890
7331	2017	890
9213	2018	890
4075	2017	890
9892	2017	889
10118	2017	889
28645	2017	889
4342	2017	889
34892	2018	889
11412	2017	889
3322	2018	888
5649	2014	888
13206	2018	886
11722	2018	886
3381	2018	885
25000	2017	884
3562	2017	883
22976	2017	883
7496	2017	883
27003	2018	883
1918	2018	882
22533	2017	882
22289	2018	882
7586	2017	882
11961	2018	881
22284	2018	880
2474	2017	879
1624	2018	878
4758	2016	877
1756	2018	877
28858	2018	877
2534	2018	876
2878	2018	876
11174	2017	876
13129	2018	876
12837	2018	876
7010	2017	876
4436	2017	875
2259	2018	875
20471	2017	875
17699	2017	874
8877	2018	874
3280	2018	874
2281	2018	874
2797	2018	873
4069	2017	873
28126	2017	873
15380	2017	873
6008	2017	872
7888	2017	871
2848	2018	870
1876	2018	870
31969	2018	870
4520	2017	870
2053	2018	870
2464	2018	869
4367	2017	869
7865	2017	869
22368	2018	868
13940	2018	868
13987	2018	867
18097	2017	867
12893	2018	866
27255	2017	866
3505	2017	864
3549	2017	864
25214	2017	863
2559	2017	863
6892	2018	863
23394	2018	863
11999	2018	863
32805	2018	863
33453	2018	862
26902	2018	862
13363	2017	861
12121	2018	861
9641	2017	861
6852	2018	860
8634	2015	860
9276	2018	859
19780	2018	859
2410	2018	858
2867	2018	858
13985	2017	858
12992	2018	858
12345	2018	857
13335	2018	857
8929	2018	856
4801	2016	856
22702	2017	856
13978	2018	855
14900	2015	855
13667	2018	855
2710	2017	854
7787	2016	854
27894	2018	854
27911	2018	854
23596	2018	853
28836	2017	853
2794	2017	853
22080	2018	852
2449	2018	852
17193	2017	852
9546	2017	851
35336	2018	851
8915	2018	851
27103	2017	851
27187	2017	851
1311	2018	849
9386	2017	849
9379	2018	849
8249	2016	848
30174	2017	848
12854	2018	848
18776	2017	847
5058	2016	847
3084	2016	846
30483	2018	844
19802	2018	844
29889	2015	844
9975	2017	844
3054	2018	844
23134	2016	844
23611	2017	843
36385	2018	843
3103	2017	842
3810	2017	842
14639	2017	842
23701	2017	842
2306	2018	842
2750	2018	841
11052	2018	841
3433	2018	841
620	2018	841
6775	2018	840
3688	2017	839
1444	2018	839
3428	2018	839
31408	2018	839
11029	2018	839
6877	2018	838
8140	2016	838
5693	2014	838
19671	2018	838
16516	2016	837
10394	2016	837
33032	2018	837
15543	2017	837
1774	2018	837
28337	2017	837
22496	2018	836
21315	2018	836
6843	2017	836
7061	2018	836
13998	2018	836
9367	2018	835
13213	2018	835
7628	2017	835
2243	2017	835
3068	2018	834
31316	2018	834
19688	2018	833
19678	2018	833
13492	2017	833
16155	2016	832
13982	2018	832
2097	2018	832
11828	2018	831
2950	2018	831
27344	2017	831
7813	2017	830
2344	2018	830
2323	2018	830
12559	2018	830
8207	2016	830
33235	2018	830
2917	2018	829
21738	2016	829
9230	2018	829
3950	2017	827
3018	2018	827
21914	2018	827
6832	2018	827
34459	2018	827
2148	2018	827
17902	2018	826
12598	2018	826
26907	2018	826
4409	2017	825
6745	2015	825
7925	2017	825
21215	2018	824
1210	2018	824
4321	2017	824
32174	2018	824
6779	2018	823
22188	2018	823
33257	2018	823
7080	2017	823
24679	2018	823
23416	2018	823
28785	2018	823
3362	2018	822
8910	2018	822
27961	2018	822
32580	2018	821
18535	2018	820
6988	2018	820
1747	2018	819
2475	2018	819
2016	2018	819
1895	2018	819
32736	2018	818
34315	2018	818
3059	2018	818
3110	2018	818
32315	2018	818
3996	2017	818
36808	2018	818
7028	2018	817
23562	2018	817
22338	2018	817
3070	2018	817
23535	2018	816
2088	2018	816
19963	2016	816
3677	2017	815
22408	2017	815
6891	2018	815
24791	2018	814
1855	2018	814
1830	2018	814
31869	2018	814
34460	2018	813
15871	2016	813
3804	2017	813
14924	2017	813
3321	2018	812
3023	2018	812
12864	2018	812
12949	2018	811
35028	2018	811
34715	2018	811
1437	2018	811
14117	2017	811
6949	2018	810
7887	2017	810
12548	2018	809
9383	2018	809
13322	2018	809
30727	2017	809
8878	2018	808
31384	2018	808
31758	2018	807
32694	2018	807
17628	2018	806
24293	2017	806
31679	2018	806
18636	2018	806
31551	2018	805
4335	2017	805
9344	2017	805
2970	2017	805
23431	2018	805
24480	2018	805
2343	2018	804
29211	2018	803
26932	2018	803
14015	2017	803
864	2016	803
11716	2018	802
9735	2017	801
23457	2018	801
13963	2018	800
2119	2018	800
28584	2018	800
2110	2018	800
7075	2018	798
20684	2018	798
13950	2018	798
2908	2018	797
18624	2018	797
12616	2017	797
7644	2017	797
2479	2018	796
23463	2018	796
32605	2018	796
27041	2018	796
12215	2018	795
37401	2018	795
17208	2017	795
18308	2018	795
14534	2017	794
3217	2018	794
2020	2018	794
18329	2018	794
7038	2018	793
11055	2018	793
32940	2018	793
4251	2017	792
35775	2018	792
2015	2018	792
7311	2017	792
27152	2017	791
21562	2017	791
31606	2018	791
12157	2018	791
16868	2018	791
9323	2018	790
30814	2017	790
27808	2018	790
24629	2018	790
29549	2017	789
29516	2017	789
12587	2018	789
12122	2018	789
13456	2018	789
2331	2017	788
32423	2018	788
3357	2018	787
2666	2018	787
17558	2018	787
24861	2018	787
7645	2017	787
12083	2018	787
13219	2018	786
15897	2016	786
7205	2017	786
22302	2018	786
2845	2018	785
14470	2017	785
3006	2018	785
22530	2018	783
13372	2018	783
2347	2018	783
7095	2018	783
11056	2018	783
3454	2018	782
7212	2017	782
2010	2018	782
27212	2017	781
2653	2018	780
2629	2018	780
12716	2018	780
7039	2018	780
19646	2018	780
3177	2018	780
1759	2018	779
3792	2016	779
3252	2018	779
1427	2018	778
11588	2018	778
4654	2017	778
12999	2018	778
24683	2018	778
12645	2017	778
26933	2018	778
15273	2017	778
15056	2017	777
12736	2018	777
7104	2018	777
3551	2017	777
7915	2017	777
2584	2018	777
10993	2017	777
24737	2018	776
24491	2018	776
24859	2018	775
36484	2018	775
17922	2018	775
1212	2018	774
9051	2018	774
24766	2018	774
34641	2018	774
12136	2018	774
14801	2017	774
32995	2018	774
20108	2018	773
2565	2018	773
32111	2018	773
12171	2018	773
24308	2018	772
6970	2018	772
14695	2017	772
20757	2017	771
12244	2018	771
29911	2016	771
11283	2017	771
30218	2018	770
10180	2016	770
14346	2017	770
2847	2017	769
21905	2018	769
11110	2018	769
29301	2018	768
37361	2018	768
2783	2018	768
12609	2018	768
23462	2018	767
21500	2017	767
12592	2018	767
12945	2018	767
12116	2018	767
28803	2018	766
1879	2018	766
13975	2018	766
22809	2017	766
3268	2018	766
12943	2018	765
6912	2017	765
13122	2018	764
29071	2018	764
38701	2017	764
9329	2018	764
29197	2018	764
23687	2018	763
21057	2018	763
7001	2018	763
7896	2017	763
21024	2018	762
25238	2016	762
1037	2018	762
7213	2017	762
22412	2018	762
18528	2018	762
31974	2018	761
2353	2018	761
25015	2017	761
1401	2018	760
15829	2016	760
3478	2017	760
3779	2017	759
24390	2018	759
4694	2016	759
4127	2017	759
1342	2018	759
32690	2018	758
4649	2017	758
33465	2018	758
11651	2018	757
38807	2016	757
32679	2018	757
14255	2017	757
9958	2016	756
27988	2018	756
31898	2018	755
9171	2018	755
3389	2017	755
10925	2018	754
18054	2018	754
4271	2017	754
2285	2018	754
9121	2018	754
13790	2018	754
3272	2018	754
7226	2017	753
26915	2018	753
5032	2016	753
16753	2018	752
33316	2018	752
36394	2018	752
15031	2017	752
614	2018	752
1685	2018	751
20980	2018	750
20147	2017	750
21039	2017	750
13807	2017	750
26821	2018	749
32998	2018	749
7036	2017	749
32193	2018	749
13549	2018	749
26887	2018	749
1176	2018	749
2495	2017	749
11063	2018	748
11195	2017	748
22003	2018	748
33725	2018	747
6881	2018	747
11653	2018	747
1623	2018	747
12882	2018	746
24311	2018	745
8188	2016	745
3511	2017	745
6155	2017	744
19908	2017	744
11204	2017	744
4511	2017	744
30527	2017	744
27694	2017	743
21310	2018	743
7454	2017	743
4793	2016	743
27110	2018	743
3757	2016	743
30296	2017	743
2839	2018	742
13161	2017	742
3025	2017	742
10917	2018	741
6911	2018	741
3057	2018	741
12501	2018	741
22522	2018	740
27051	2018	740
31185	2018	740
23641	2018	740
3096	2018	740
2748	2018	740
37099	2018	739
7057	2017	739
23272	2018	739
19119	2017	739
2740	2018	739
9280	2018	739
3079	2017	739
21442	2017	738
26979	2018	738
6938	2018	738
22958	2017	738
14051	2017	738
7756	2017	738
28783	2018	737
8456	2016	737
29286	2018	737
6926	2018	737
32155	2018	737
3495	2017	737
9798	2017	737
17905	2018	737
7046	2018	736
12503	2018	736
18133	2017	736
4935	2016	735
22025	2017	735
3772	2017	735
27011	2018	735
6841	2018	735
20668	2017	734
1062	2018	734
2601	2018	734
13278	2018	734
6850	2018	733
26935	2018	733
3427	2018	732
3086	2018	732
33767	2018	732
3171	2018	732
24950	2017	732
27921	2018	732
2610	2018	731
683	2018	731
13593	2018	731
7048	2018	730
13814	2018	730
2231	2018	730
33822	2018	730
30469	2018	730
33386	2018	730
25047	2017	730
10282	2015	730
6901	2018	729
36181	2018	729
13481	2018	728
31732	2018	728
1894	2018	728
13687	2018	728
14025	2017	728
22279	2018	728
28452	2016	727
28737	2018	727
14253	2017	727
32882	2018	727
6885	2018	727
31584	2018	727
2725	2018	727
29916	2016	726
3067	2017	726
2068	2018	726
20997	2018	725
9009	2017	725
13545	2018	725
31208	2018	725
8441	2015	725
9427	2018	724
16929	2017	724
28186	2017	724
26944	2017	723
2708	2017	723
14191	2017	723
29371	2018	723
27191	2017	722
4932	2016	722
12344	2018	722
24232	2017	722
20642	2016	722
17696	2017	722
15179	2017	722
1220	2018	721
27862	2018	720
17996	2018	720
24556	2017	719
29383	2017	719
12475	2018	719
2976	2017	719
20661	2018	719
24150	2018	719
22720	2017	718
14395	2017	718
23330	2018	718
27970	2018	718
23580	2018	717
1826	2018	717
4430	2017	717
9397	2018	717
33356	2018	717
737	2018	717
2003	2018	717
3031	2017	716
11907	2018	716
12711	2018	716
14131	2017	716
8072	2016	716
26787	2018	716
21909	2018	715
21319	2018	715
18305	2018	715
32647	2018	715
8341	2015	715
31783	2018	715
28821	2018	715
29272	2018	715
23648	2018	714
21099	2018	714
17616	2018	714
12915	2017	713
18619	2018	713
7019	2018	712
24595	2018	712
11572	2018	712
13989	2018	712
12049	2018	712
4349	2017	712
[truncated: 35,564 more rows]
