# Supplementary material for: Tracking the popularity and outcomes of all bioRxiv preprints
Source: eLife journal article supplement (doi:10.7554/elife.45133), 2019-04-24
Supplement: supp [file elife-45133-supp-v1.zip › elife_poa_e45133_Figure_2_figure_supplement_4_source_data_1.csv]

article	downloads	year
11009	306	2018
25574	296	2017
1010	75	2018
852	88	2018
14984	460	2017
547	121	2018
5027	344	2016
26821	749	2018
549	74	2018
673	101	2018
16835	45	2018
27528	1143	2014
32983	1907	2018
13407	693	2018
18200	567	2017
1431	435	2018
26932	803	2018
25281	358	2017
14605	3030	2017
753	52	2018
7217	573	2017
31356	64	2018
6824	430	2018
16829	37	2018
25889	292	2016
16717	701	2014
441	59	2018
18181	232	2017
1763	83	2018
27195	562	2017
18029	243	2018
27153	559	2017
26735	1252	2018
27220	579	2017
412	112	2018
25102	333	2017
18058	1091	2018
7504	874	2017
27308	541	2017
5215	328	2016
19693	73	2018
18071	152	2017
16132	1624	2016
16748	60	2018
18865	984	2017
27177	711	2017
23275	1077	2017
26733	956	2018
31307	93	2018
14263	482	2017
16731	45	2018
25643	297	2017
16769	53	2018
8901	165	2018
26967	587	2018
25848	310	2016
1780	644	2018
27336	493	2017
19674	67	2018
19644	73	2018
26818	546	2017
18612	185	2018
7182	2611	2018
27448	514	2016
16745	32	2018
25265	308	2017
7477	551	2017
8380	822	2015
25091	313	2017
24621	346	2018
27189	510	2017
16739	47	2018
17190	261	2017
25613	294	2017
24546	318	2018
16729	72	2018
17308	482	2017
15100	500	2017
17142	394	2017
16654	492	2015
24961	295	2017
17325	183	2017
17177	504	2017
26188	479	2016
3397	423	2018
2846	558	2018
6035	426	2017
26337	286	2015
25942	280	2016
17249	309	2017
18231	20588	2016
26488	280	2015
17801	159	2018
13017	393	2017
18118	2280	2017
12748	598	2018
16578	1052	2015
27113	736	2017
16984	230	2017
16589	388	2015
27370	458	2017
14255	1054	2017
4117	317	2017
17222	515	2017
18742	608	2017
4737	317	2016
16646	1020	2015
24342	368	2018
27232	503	2017
17203	434	2017
32809	98	2018
13490	1044	2017
27273	479	2017
8099	491	2016
26973	475	2017
16724	80	2018
17120	341	2017
6973	291	2018
8443	501	2016
16331	1062	2016
7264	866	2017
17237	222	2017
2756	518	2018
19430	542	2014
23126	824	2016
22537	517	2017
26086	282	2016
24996	316	2017
24473	420	2018
15226	418	2017
19251	521	2016
24837	661	2018
27367	418	2017
27495	415	2016
5113	1382	2016
22856	498	2017
9755	141	2017
7258	878	2017
27046	171	2018
27214	395	2017
19140	515	2016
18937	509	2016
26901	474	2018
27146	424	2017
22583	505	2017
25182	284	2016
27247	434	2017
26778	503	2018
31569	68	2018
25744	284	2017
18619	713	2018
23124	502	2016
25334	282	2017
27365	382	2017
13832	443	2017
7781	1704	2017
22019	582	2018
18298	491	2017
32865	114	2018
24468	186	2018
28494	5581	2015
27458	371	2016
26865	490	2018
27394	392	2017
25531	287	2017
27513	363	2015
5326	1326	2016
26787	716	2018
24753	434	2017
5349	1235	2015
24858	286	2018
4492	322	2017
23143	480	2016
27314	361	2017
26799	519	2018
18492	542	2018
19460	405	2014
27498	363	2015
9423	297	2018
23122	452	2016
32305	43	2018
26887	749	2018
27083	468	2018
18816	529	2018
24750	411	2018
22521	380	2017
27445	370	2016
32913	63	2018
24970	315	2018
32879	382	2018
25673	284	2017
22730	351	2017
10668	719	2015
26827	88	2018
27512	341	2015
24829	216	2018
27429	347	2016
15045	1545	2017
27327	370	2017
27397	336	2017
26098	285	2016
5047	1178	2016
22237	402	2018
19243	354	2016
22315	357	2018
27419	367	2016
10636	2146	2015
8883	86	2018
8997	123	2018
27099	483	2018
31571	40	2018
27040	378	2018
24572	370	2018
10327	262	2016
24929	470	2018
6763	861	2014
25748	296	2017
27323	327	2017
27406	339	2017
27379	328	2017
22545	399	2018
25105	311	2017
27507	323	2015
24906	113	2018
27059	405	2018
5084	325	2016
7274	852	2017
10210	553	2015
27320	331	2017
24063	885	2016
1275	626	2017
27383	316	2017
8918	297	2018
25851	280	2016
27268	328	2017
31745	90	2018
27249	325	2017
26987	391	2018
12183	187	2018
16259	146	2016
26728	122	2018
24885	389	2017
10522	526	2015
25561	288	2017
12462	154	2018
26736	464	2018
30946	546	2016
27359	322	2017
17125	297	2017
9690	237	2017
24818	143	2018
24785	275	2017
24424	380	2017
31792	85	2018
27267	308	2017
9678	221	2017
22888	287	2017
26830	524	2018
27382	306	2017
26360	196	2015
9015	633	2017
8663	490	2014
13217	1109	2018
27309	346	2017
8348	495	2016
9183	76	2018
27244	304	2017
27206	387	2017
32133	78	2018
27135	247	2018
9539	268	2017
27279	340	2017
27108	360	2018
27425	288	2016
23469	1014	2018
25458	297	2017
31670	63	2018
5233	924	2016
10463	525	2015
27178	368	2017
27194	323	2017
13718	829	2017
9609	564	2017
25515	296	2017
27417	298	2016
10521	1050	2015
10632	512	2015
26870	395	2018
9083	1218	2018
26113	275	2016
27363	278	2017
24527	90	2018
24196	103	2018
27354	278	2017
24719	288	2018
27105	277	2018
27358	290	2017
26726	370	2018
22365	260	2018
25572	275	2017
25072	307	2017
27160	274	2017
22352	297	2018
23181	791	2016
24384	102	2018
32134	58	2018
27292	257	2017
27294	268	2017
10626	505	2015
10077	273	2017
27347	267	2017
10444	522	2016
9556	275	2017
27515	244	2015
24338	325	2017
9061	152	2018
9478	629	2017
2005	2151	2016
9496	657	2017
27128	314	2018
9933	6664	2017
27449	256	2016
25421	286	2017
9436	316	2018
27217	261	2017
25280	269	2017
18953	285	2017
24689	307	2017
12062	218	2018
27400	250	2017
27334	266	2017
9732	6374	2016
5616	790	2015
10064	520	2016
9741	126	2017
10418	830	2016
9838	460	2017
10165	812	2016
32956	106	2018
10397	376	2016
9252	1005	2017
25302	290	2017
31598	204	2018
31600	79	2018
9214	150	2018
31780	158	2018
8722	504	2014
15803	404	2017
24119	868	2014
30127	252	2017
27175	250	2017
32172	353	2018
27330	298	2017
27253	236	2017
27549	183	2018
9046	171	2018
20093	276	2018
31783	715	2018
31810	48	2018
27066	265	2018
20059	322	2018
31622	70	2018
6163	576	2017
7567	231	2017
3108	2037	2018
10171	550	2016
3146	322	2017
25704	765	2017
24932	285	2017
31634	156	2018
3773	279	2017
24805	272	2017
20075	249	2018
12997	199	2018
26925	353	2018
23309	1420	2018
26845	352	2018
1811	303	2018
31784	300	2018
27729	423	2015
27493	217	2016
25257	272	2017
4357	704	2016
1825	290	2018
7746	182	2017
27340	227	2017
27436	213	2016
10086	563	2017
26131	268	2016
26905	230	2018
23418	211	2018
26942	285	2018
26852	343	2018
27095	203	2018
26823	314	2018
10685	519	2014
27325	207	2017
9869	576	2017
10602	494	2015
32188	77	2018
9255	699	2018
24607	364	2017
23838	897	2017
25861	264	2016
29740	463	2017
32192	1322	2018
1737	292	2018
27123	194	2018
27295	253	2017
27098	192	2018
26983	163	2018
26840	288	2018
26978	451	2018
26956	176	2018
27219	169	2017
27371	163	2017
7804	670	2017
23385	173	2018
27414	152	2016
31758	807	2018
15933	1032	2017
27231	158	2017
27064	183	2018
32340	466	2018
5155	2492	2016
27427	224	2016
2994	1686	2017
27014	199	2018
5396	606	2015
26913	161	2018
27183	141	2017
8444	1907	2015
22918	200	2017
27120	173	2018
7720	521	2017
27822	187	2018
27300	153	2017
27081	151	2018
1462	127	2018
10682	502	2014
21936	160	2018
22421	341	2018
26147	274	2016
26834	163	2018
26793	225	2018
9574	549	2017
27411	118	2017
26999	136	2018
22398	86	2018
26563	259	2014
24759	268	2016
7493	670	2017
10614	498	2015
27034	143	2018
8029	633	2017
9874	498	2017
26750	188	2018
26968	153	2018
27096	134	2018
26187	379	2015
27283	112	2017
1707	258	2018
10178	502	2016
25761	196	2017
22626	758	2017
27069	112	2018
9714	499	2017
27004	120	2018
12863	138	2018
24118	787	2014
25088	284	2017
26780	281	2018
24305	517	2018
26586	259	2014
26811	190	2018
26195	1120	2016
23434	872	2017
14710	1144	2017
10274	492	2016
26783	143	2018
23169	536	2016
12897	684	2017
25965	261	2016
27162	94	2017
22935	11151	2017
22576	387	2017
25908	276	2016
23208	9502	2015
26857	132	2018
9414	1148	2018
26761	385	2018
9540	783	2017
10115	474	2017
27114	106	2018
26841	115	2018
26976	119	2018
26815	265	2018
8045	601	2016
24561	290	2017
27043	250	2018
9880	469	2017
10298	462	2016
11324	294	2017
13288	1042	2017
24985	274	2017
26266	253	2015
27227	88	2017
27070	86	2018
24786	274	2018
26766	116	2018
15262	1412	2017
27037	90	2018
25556	275	2017
26156	252	2016
26964	84	2018
26335	2222	2015
4890	945	2016
19958	278	2017
26912	97	2018
26107	247	2016
26997	81	2018
7416	450	2017
26807	83	2018
4148	327	2017
27132	74	2018
26890	72	2018
8786	508	2014
4836	782	2016
26990	106	2018
23205	2843	2015
26763	96	2018
7007	3974	2017
26767	77	2018
8101	430	2016
27009	106	2018
25371	264	2017
26879	83	2018
26906	66	2018
22772	9556	2017
16579	981	2015
26703	120	2018
7766	456	2017
25725	252	2017
27013	223	2018
26788	288	2018
26351	1800	2015
32551	492	2018
32023	89	2018
22348	9838	2017
26773	43	2018
26877	46	2018
6890	315	2017
24633	377	2017
26806	52	2018
26745	54	2018
7473	873	2017
13877	395	2018
26757	46	2018
26698	209	2018
26707	60	2018
15994	451	2016
31513	117	2018
2387	104	2018
31757	50	2018
31755	39	2018
23818	907	2017
2616	294	2018
25658	232	2017
22789	681	2017
27345	0	2017
32894	105	2018
25419	252	2017
6798	528	2018
14036	109309	2017
26285	187	2015
14172	674	2017
25772	265	2016
13873	19117	2017
24670	381	2018
15728	2649	2017
16258	7669	2016
16610	6792	2014
28107	230	2017
26134	246	2016
25064	316	2017
4092	250	2017
14952	6985	2017
26055	245	2016
5348	247	2015
23733	791	2017
15330	6467	2017
16709	5541	2013
32028	96	2018
22191	3288	2018
3184	141	2018
27271	209	2017
28205	356	2017
25248	261	2017
27121	201	2018
4912	489	2016
22378	2442	2018
16344	6033	2016
25188	257	2017
2847	1375	2017
13001	6440	2018
26496	718	2015
23346	1088	2018
14689	5128	2017
4359	493	2017
22867	1814	2017
27203	159	2017
16054	4067	2016
4272	507	2017
32035	166	2018
26676	241	2014
4195	250	2017
24977	300	2016
16389	3669	2016
1622	667	2018
32912	66	2018
4564	606	2017
767	208	2018
6802	92	2018
3070	817	2018
16703	3668	2014
14924	3544	2017
14225	3985	2017
20483	200	2018
4664	805	2016
15630	3352	2017
26923	212	2018
26423	254	2015
4110	261	2017
15972	2043	2016
22842	1828	2017
14899	3378	2016
3574	236	2017
13884	4660	2018
7790	337	2017
15577	2188	2017
16682	3140	2014
15693	3216	2017
14947	3052	2017
15032	3123	2016
27179	198	2017
10601	2782	2015
7553	495	2017
14649	3488	2017
22714	1709	2017
15173	3084	2017
32921	59	2018
7370	528	2017
8603	514	2015
13100	3535	2018
16670	2914	2014
8546	648	2015
15871	2940	2016
27023	335	2018
19698	434	2018
12826	3320	2018
7151	425	2018
15505	2834	2017
14670	1631	2017
23144	1682	2016
14507	2909	2017
3865	270	2017
13513	3327	2018
14900	2802	2015
12492	3324	2018
13420	3287	2018
15164	2663	2016
13032	3173	2018
15897	2565	2016
12125	2692	2018
15655	2744	2016
26936	425	2018
12033	2861	2017
15370	2465	2017
16440	2451	2016
16644	2312	2015
16471	2265	2015
16643	2293	2015
31280	81	2018
23904	96	2017
16706	2143	2014
14123	2717	2017
7095	783	2018
15579	2169	2017
13510	2236	2018
20005	527	2016
15558	2008	2016
13027	2042	2017
15677	2024	2017
23417	144	2018
13361	2190	2017
15739	1907	2017
7107	517	2018
25252	278	2017
12599	1951	2018
14638	2247	2017
8127	630	2016
12175	113	2018
16679	1837	2014
13874	3946	2017
7508	541	2017
16292	1828	2016
16539	1589	2015
2475	819	2018
15824	1785	2017
1624	878	2018
16429	1793	2016
16359	1835	2016
16237	1694	2016
13828	1881	2018
22720	1499	2017
15989	1666	2016
14479	1698	2017
22567	1473	2017
2882	312	2018
13738	1935	2018
32944	422	2018
13363	1797	2017
12222	2058	2017
25745	243	2017
26252	238	2015
25038	272	2017
25805	245	2016
23203	1163	2015
24665	282	2018
24934	265	2017
14190	2054	2017
1268	453	2017
25381	252	2017
24435	346	2018
26154	238	2016
22395	1106	2018
16450	1400	2016
26247	240	2015
24957	257	2017
24327	278	2017
15299	1617	2017
22687	1060	2017
13521	161	2018
24339	253	2017
25664	235	2017
28674	2160	2017
24833	245	2017
25158	255	2017
16155	1712	2016
25873	228	2016
15710	1682	2017
15632	1009	2016
16218	814	2016
24630	248	2018
3595	259	2017
15688	1581	2016
3869	315	2017
14068	1062	2017
26723	319	2018
25808	232	2016
24359	342	2018
27156	422	2017
24240	304	2018
23618	998	2018
24815	263	2018
11917	128	2018
24220	368	2018
24507	284	2018
13763	1661	2016
8685	489	2015
24355	232	2018
15802	1371	2017
23069	1026	2016
25695	221	2016
7228	705	2017
26004	224	2016
25328	258	2017
16213	1506	2016
27005	246	2018
12359	387	2018
16796	265	2018
13579	1585	2016
14695	1635	2017
30444	112	2018
16642	1468	2014
22834	1031	2017
7380	282	2017
26547	219	2014
25320	233	2017
26260	217	2015
25503	238	2017
25794	228	2016
24442	273	2017
8362	274	2016
26061	218	2016
3736	278	2017
26294	219	2015
26073	230	2016
4083	238	2017
26765	212	2018
25603	224	2017
22809	1195	2017
4612	1244	2016
22910	903	2017
22829	933	2017
25234	241	2017
4461	974	2017
26041	228	2016
32318	245	2018
18019	321	2018
8693	259	2015
25554	209	2017
15407	1529	2017
15801	1004	2017
25123	229	2017
24124	743	2014
19220	1005	2016
27193	170	2017
24738	239	2017
3983	397	2016
2819	259	2018
27016	194	2018
25150	217	2017
14386	1648	2017
24441	259	2017
24319	220	2017
4042	323	2017
3192	394	2018
23068	929	2016
1681	1942	2017
15934	1437	2017
5771	1207	2014
28530	657	2014
11891	1484	2016
23044	927	2017
26218	213	2016
26438	215	2015
25229	231	2017
24548	296	2018
26831	191	2018
19734	308	2017
4631	1277	2016
26378	210	2015
7772	1663	2017
27278	155	2017
15730	1741	2017
28543	291	2018
4691	369	2017
14298	1537	2017
4332	1252	2017
26069	212	2016
25683	165	2017
22994	619	2017
25966	209	2016
26953	176	2018
26046	209	2016
32746	225	2018
23900	866	2017
25640	208	2017
2270	312	2018
24253	302	2018
22418	972	2018
24321	309	2018
19920	262	2017
23133	895	2016
24358	301	2018
5555	1185	2015
31206	941	2018
24835	253	2018
25262	212	2017
19622	229	2018
26878	158	2017
12682	1623	2018
16538	1433	2016
1793	388	2018
19514	130	2018
14470	1572	2017
23028	861	2017
25175	219	2017
24931	210	2018
25553	210	2017
16723	1372	2013
19862	243	2017
13309	1547	2018
4609	1211	2016
19738	2367	2018
25154	225	2017
3273	218	2018
24033	717	2016
24895	247	2018
2021	265	2018
1816	1378	2018
24244	300	2018
25362	207	2017
24700	293	2018
24756	207	2018
19526	508	2018
5145	1171	2015
15130	1488	2017
25210	205	2017
23021	818	2016
2665	373	2017
26042	196	2016
23229	808	2014
19957	161	2017
25804	209	2016
22855	871	2017
33416	30	2018
24641	215	2018
23047	802	2016
26082	194	2016
23031	1404	2017
24651	258	2018
2008	426	2018
4870	1155	2016
24765	241	2018
23224	772	2014
25399	197	2017
26065	194	2016
26824	313	2018
26072	190	2016
15857	1247	2017
25143	216	2017
25364	202	2017
24706	237	2018
3606	201	2017
25172	218	2017
25289	196	2017
4116	191	2017
24646	285	2018
1157	161	2018
7116	210	2018
26382	190	2015
24946	190	2018
21989	1034	2018
23804	833	2017
4938	287	2016
25897	186	2016
23687	763	2018
24836	247	2018
16078	232	2016
23110	731	2016
25141	202	2017
24901	197	2018
16628	1364	2014
4186	304	2017
19906	74	2017
25661	192	2017
32265	67	2018
3562	1330	2017
23240	1008	2018
3409	353	2018
24583	219	2018
25413	197	2017
24856	207	2017
24090	697	2014
25544	190	2017
27151	144	2017
24775	189	2018
25724	182	2017
19573	75	2018
22914	797	2017
24252	356	2018
25063	197	2017
27033	134	2017
2870	353	2018
28892	488	2017
23715	782	2017
25986	174	2016
26774	154	2018
1630	217	2018
24577	189	2017
25757	174	2017
19617	79	2018
25728	176	2017
19879	219	2017
19882	206	2017
24495	355	2018
23621	706	2017
31232	266	2018
16426	1366	2016
24612	335	2018
25149	190	2017
24400	245	2018
27626	361	2018
24954	200	2018
24233	201	2017
15334	243	2017
24419	218	2018
15197	469	2017
27303	446	2017
24883	192	2018
23908	691	2017
25372	184	2017
23867	688	2017
16319	564	2016
23796	673	2017
24588	204	2018
14517	523	2017
25776	172	2016
5779	299	2013
25329	196	2017
15410	1402	2017
4124	315	2017
25325	168	2017
5296	1102	2016
24863	215	2018
24322	253	2018
24406	195	2018
26048	169	2016
15785	490	2015
3557	102	2017
24661	181	2018
13216	1458	2016
15990	1348	2016
27233	125	2017
19793	223	2018
14224	1479	2017
26015	161	2016
1650	238	2018
26354	161	2015
32325	94	2018
25647	185	2017
15279	1439	2017
25513	159	2017
6897	202	2018
32332	421	2018
23403	104	2018
25674	162	2017
14494	1437	2017
25415	165	2017
15758	1462	2017
23095	222	2016
14046	528	2017
24975	182	2018
26986	121	2018
16720	1304	2013
33069	71	2018
16665	1373	2015
25423	159	2017
25478	147	2017
25003	158	2017
19937	157	2017
14029	1379	2018
26899	149	2018
16246	1196	2016
25002	185	2017
15021	464	2017
24642	149	2018
14089	1357	2017
24445	189	2018
5639	1109	2014
25174	142	2017
24452	199	2018
32350	37	2018
16378	412	2016
16326	1304	2016
2745	178	2018
24590	165	2018
25653	138	2017
12870	1433	2018
24675	179	2018
10847	150	2018
22284	880	2018
26822	162	2018
23347	672	2016
1927	1899	2018
2960	201	2018
24625	188	2018
3140	218	2018
26276	133	2015
5065	699	2016
15159	1422	2017
32264	571	2018
24438	151	2018
23907	696	2017
25185	166	2017
6014	303	2017
32270	223	2018
26713	287	2018
4945	268	2016
23993	682	2017
22135	756	2017
24716	157	2018
25205	137	2017
4885	252	2016
25473	129	2017
23998	659	2017
23636	691	2018
25864	135	2016
4051	284	2017
16236	415	2016
15419	1315	2017
25406	140	2017
32081	64	2018
24774	164	2018
25545	129	2017
4022	247	2017
25311	127	2017
24643	223	2018
23734	777	2017
24417	183	2018
15858	478	2017
25077	130	2017
23035	672	2017
24177	144	2017
32085	143	2018
29369	172	2018
24521	156	2018
15473	1320	2017
23830	665	2017
24263	133	2018
15528	1283	2016
24170	175	2018
23802	630	2017
3160	255	2018
4026	286	2017
25065	173	2017
24857	129	2018
16749	61	2018
16189	1313	2016
14611	489	2017
4003	388	2017
24769	163	2018
1723	152	2018
16257	323	2016
24289	228	2018
24579	139	2018
4079	158	2017
29017	3699	2016
26770	173	2018
24846	126	2018
23861	672	2017
24357	134	2018
14960	229	2017
4192	163	2017
29115	103	2018
24494	161	2018
22573	718	2017
23896	645	2017
16530	1312	2015
23050	648	2017
26071	115	2016
4040	1107	2016
24600	124	2017
7534	455	2017
25425	124	2017
24678	147	2018
22599	699	2017
24842	117	2017
3945	147	2017
31702	552	2018
3709	149	2017
12187	1391	2017
24222	274	2018
15680	1278	2016
29455	1727	2018
25906	107	2016
24304	155	2018
1827	111	2018
23742	659	2017
3730	166	2017
19484	176	2018
25025	139	2017
25412	107	2017
16602	1237	2014
31285	300	2018
23995	662	2017
24317	174	2018
23699	685	2017
24711	127	2018
23648	714	2018
32459	311	2018
14782	1305	2017
2591	237	2018
24201	172	2018
25273	120	2017
31701	467	2018
24682	110	2018
3966	907	2017
24125	603	2014
24391	149	2018
1973	66	2018
6894	444	2018
24896	114	2018
24248	133	2018
14735	1238	2017
24768	125	2018
14627	441	2017
24477	154	2018
16063	386	2016
15115	386	2017
24332	139	2018
24736	97	2018
22750	185	2017
23801	615	2017
15047	427	2017
12237	1873	2018
25527	125	2017
14996	378	2017
23457	801	2018
24538	108	2018
14176	1382	2017
27288	120	2017
24109	587	2014
15598	384	2017
15520	1275	2017
24734	106	2018
26850	262	2018
25354	100	2017
19812	625	2016
1946	574	2018
22212	928	2018
24667	123	2018
24464	127	2018
23573	588	2017
26210	258	2016
24574	126	2018
24108	569	2014
16518	1259	2016
24388	113	2018
15950	199	2017
24313	121	2018
23599	622	2018
25202	95	2017
15849	1232	2017
13879	455	2018
24414	135	2018
24369	102	2017
24129	569	2014
19982	365	2017
11979	515	2018
24467	113	2018
1821	56	2018
24817	106	2018
24231	100	2017
20032	304	2015
2512	115	2018
25183	87	2017
13656	1545	2018
5579	1056	2015
23978	587	2017
27168	112	2017
15273	1632	2017
24257	1185	2018
24489	133	2018
24542	121	2018
23819	567	2017
24509	132	2018
23865	589	2017
24993	83	2017
23449	683	2018
25090	122	2017
23184	585	2016
24593	117	2018
23394	863	2018
22704	644	2017
24616	130	2018
24183	115	2018
24398	113	2018
13907	1223	2016
24764	78	2018
32299	551	2018
24446	115	2018
24834	86	2018
22511	676	2018
32298	406	2018
24645	79	2018
32304	60	2018
23515	682	2018
14318	1284	2017
23797	537	2017
9700	184	2017
4131	232	2017
24334	71	2018
24236	122	2018
13011	255	2018
25080	61	2017
5757	1054	2014
32302	57	2018
19758	132	2018
25084	71	2017
24316	80	2018
24336	87	2018
31274	166	2018
14254	223	2017
23983	546	2017
11530	1075	2015
16444	1083	2016
31706	182	2018
24479	72	2018
24664	72	2018
24141	195	2018
24238	84	2018
3655	806	2017
24481	69	2018
24776	48	2018
16217	309	2016
12221	474	2018
16551	305	2015
3547	928	2017
14700	1464	2017
15636	295	2017
24466	92	2018
14845	299	2017
24988	48	2017
12553	311	2018
24198	139	2018
24451	53	2018
31703	117	2018
28572	260	2018
4353	227	2017
29247	1603	2018
2714	263	2018
23821	582	2017
3230	270	2018
24174	67	2018
31697	260	2018
24258	62	2018
11832	403	2018
32314	206	2018
31273	228	2018
2597	71	2018
24264	68	2018
3364	129	2018
24350	67	2018
13205	382	2018
27656	240	2017
32317	125	2018
26930	153	2018
32326	38	2018
24605	48	2018
22311	631	2018
31963	140	2018
24032	518	2016
16203	282	2016
24148	109	2018
24172	58	2018
31700	79	2018
31964	197	2018
31271	147	2018
12970	1107	2017
32327	142	2018
24157	95	2018
31269	220	2018
31695	205	2018
31481	38	2018
25445	171	2017
11998	1249	2018
22678	823	2017
11721	426	2017
16021	1259	2016
23869	516	2017
22586	670	2017
22770	585	2017
10561	32012	2015
9821	10193	2017
22884	684	2017
23186	670	2016
9322	6133	2017
9852	6444	2017
23645	586	2018
22289	882	2018
32329	94	2018
14009	325	2018
22919	621	2017
15992	1289	2016
22530	783	2018
19745	143	2018
10599	4983	2015
22387	712	2017
32331	148	2018
16275	1203	2016
10426	4321	2015
4559	1129	2017
14534	1435	2017
23960	567	2017
22613	628	2017
32334	74	2018
22876	623	2017
32335	180	2018
22800	583	2017
3483	129	2017
16690	1237	2014
15074	1231	2016
25052	168	2017
23137	538	2016
22403	555	2018
6788	469	2018
10640	3215	2014
25159	376	2016
15403	204	2017
22836	476	2017
4910	1051	2016
28336	1121	2017
28649	469	2017
9159	3427	2017
23001	488	2017
23199	460	2015
18884	57	2017
16362	1193	2016
32093	71	2018
16380	303	2016
16138	1180	2016
23019	570	2017
3383	137	2018
22275	543	2018
22255	612	2018
10407	2903	2016
16028	1197	2016
22316	556	2017
27965	233	2018
23165	440	2016
23082	440	2016
2773	177	2018
10621	2677	2014
24674	125	2017
502	264	2018
32341	62	2018
9770	2618	2017
14235	368	2017
4159	225	2017
23851	695	2017
32342	103	2018
9524	2767	2017
16507	1174	2015
10062	2653	2017
22819	579	2017
22706	403	2017
9890	1571	2017
13258	1392	2018
14073	973	2017
12604	368	2018
25514	495	2017
1528	125	2017
24245	189	2018
1121	292	2018
15451	1011	2017
22444	411	2018
19517	148	2018
23058	398	2016
22949	411	2017
9809	1477	2017
10454	1363	2016
1371	122	2018
22630	449	2017
19861	121	2017
9270	1629	2018
10544	1413	2015
2342	175	2018
15066	241	2017
23094	382	2016
12925	1199	2018
3309	84	2018
9354	1749	2018
10276	1441	2016
22742	411	2017
3058	150	2018
9419	1487	2018
16214	963	2015
6902	399	2018
14401	1042	2017
22119	253	2018
27661	207	2017
15813	220	2017
3069	744	2016
9476	1449	2017
4481	1047	2017
23990	457	2016
13401	1045	2017
16411	959	2016
11729	320	2018
10528	1350	2015
3566	138	2017
23894	492	2017
5706	775	2014
24039	419	2016
23736	436	2017
27968	338	2018
23862	419	2017
2935	1026	2017
1147	221	2018
9851	1371	2017
13145	280	2018
4352	687	2017
606	152	2018
24072	416	2015
5177	659	2016
10288	1361	2016
3262	1006	2018
4424	117	2017
10184	1465	2016
23931	421	2017
5024	204	2016
23271	468	2017
23287	1077	2018
2321	507	2017
23678	425	2018
4068	137	2017
9611	1336	2017
866	133	2018
583	195	2018
9243	1634	2018
23957	404	2017
1475	101	2018
5760	932	2014
23304	611	2018
9415	1356	2018
23853	410	2017
4189	697	2017
24036	393	2016
14086	188	2017
4779	969	2016
3268	766	2018
23721	475	2017
10067	1612	2017
5174	738	2016
2571	187	2018
24026	395	2016
23660	516	2018
13943	1028	2018
9195	1642	2018
10109	1190	2016
15963	1005	2016
33302	81	2018
4951	950	2016
23602	421	2018
1083	150	2018
10582	1216	2015
10293	1210	2016
21135	305	2018
3957	1009	2017
1014	130	2018
9177	1444	2018
5659	606	2014
14051	1068	2017
9959	1203	2016
23812	424	2017
31183	259	2018
23860	459	2017
9964	1230	2017
10452	1149	2014
1135	160	2018
2538	198	2018
24052	378	2016
13294	433	2017
1358	97	2018
23176	525	2016
933	284	2018
9779	1336	2017
579	141	2018
23416	823	2018
2984	258	2018
9303	1446	2018
16290	969	2016
7607	513	2017
25191	180	2017
466	351	2018
15162	1114	2017
1536	220	2017
9618	1150	2017
23488	551	2018
2209	126	2018
24029	380	2016
11697	438	2018
9318	1429	2018
23560	459	2018
23279	463	2018
10466	1093	2016
9199	1473	2018
22592	553	2017
9993	1112	2016
1028	110	2018
3229	356	2018
13533	436	2018
24046	361	2016
12299	1143	2017
16358	934	2016
9434	1186	2017
9126	1229	2018
10571	1074	2015
9858	1152	2017
9904	1147	2017
2460	246	2018
10083	1095	2016
10279	1104	2016
14885	393	2017
23588	364	2017
1174	135	2018
716	122	2018
23486	378	2016
2334	52	2018
3763	979	2017
654	184	2018
2918	180	2018
23656	429	2018
10052	1046	2017
10093	1112	2017
3085	208	2018
14614	976	2017
23563	870	2017
23784	423	2017
15129	2275	2017
9704	1063	2017
1416	100	2018
31213	159	2018
2108	1290	2017
17934	420	2017
23498	410	2018
1114	223	2018
13492	1291	2017
18368	86	2018
12366	1156	2018
3157	234	2018
19712	45	2018
3225	353	2018
4594	523	2017
16225	949	2016
6909	206	2018
10654	1049	2015
15808	406	2017
23538	645	2018
3289	519	2017
24058	347	2016
21404	179	2018
15892	953	2016
2388	135	2018
10238	1037	2016
13236	941	2017
23940	337	2017
8142	292	2016
2513	102	2018
2758	97	2018
23743	341	2017
14557	216	2017
8993	1212	2018
13562	1014	2017
23669	350	2018
12091	362	2018
3992	497	2017
23884	326	2017
10638	997	2014
4295	496	2017
16546	934	2015
10010	1014	2016
1165	241	2018
2307	118	2018
23738	470	2017
3593	194	2017
2930	232	2018
12565	255	2018
29033	398	2015
10103	1117	2017
10379	1004	2016
16713	931	2013
2458	137	2018
10625	1000	2015
24035	300	2016
4210	501	2017
16634	906	2015
3635	180	2017
23922	306	2017
10382	1003	2015
10459	991	2015
31610	193	2018
8463	467	2016
2311	214	2018
13755	388	2018
10133	1041	2017
19482	65	2018
23467	391	2018
16040	368	2016
15860	381	2016
26888	184	2018
10587	977	2015
16255	945	2016
2775	586	2018
14421	434	2017
778	142	2018
27161	90	2017
951	152	2018
1876	870	2018
2955	95	2018
9272	1026	2017
23374	608	2018
9762	1002	2016
9895	984	2017
9393	1014	2017
15674	347	2017
15431	929	2016
3480	80	2017
23919	312	2017
2319	90	2018
10037	972	2017
2903	108	2018
23646	337	2018
736	232	2018
28833	516	2018
23551	330	2018
1063	124	2018
10728	926	2014
15038	968	2017
9727	960	2017
8569	361	2015
23814	296	2017
23566	343	2018
10300	943	2015
13331	438	2018
10697	917	2014
14787	1148	2017
23693	287	2017
15325	341	2017
15347	545	2017
511	140	2018
9722	922	2015
13983	975	2018
9805	938	2017
3641	459	2017
6209	263	2017
1418	208	2017
3001	227	2018
24752	207	2018
4832	415	2016
25462	154	2017
23319	380	2018
5370	1593	2015
742	302	2018
23270	571	2018
10146	912	2016
23969	274	2017
23572	321	2018
1075	103	2018
27349	189	2017
15355	912	2017
3351	189	2018
19038	1573	2016
488	148	2018
23673	392	2018
9645	985	2017
24006	264	2016
13949	189	2018
3249	292	2018
792	178	2018
23221	504	2014
5241	396	2016
15565	967	2017
3213	192	2018
14883	160	2017
23824	265	2017
14220	373	2017
9404	945	2017
10158	878	2017
5768	930	2014
22965	381	2017
10432	878	2016
14058	925	2017
23101	373	2016
9114	562	2018
9782	935	2017
24041	264	2016
14989	349	2017
3328	1007	2017
15806	355	2017
10551	396	2015
23938	263	2017
16722	324	2013
9008	1017	2018
16388	917	2016
2201	64	2018
23902	256	2017
14320	332	2017
876	162	2018
23984	262	2017
4259	961	2017
16802	54	2018
10153	994	2017
15186	1015	2017
10429	839	2016
15957	955	2017
22880	388	2017
26265	155	2015
22940	379	2017
23895	252	2017
11559	1174	2017
16451	939	2016
1304	128	2018
3533	214	2017
23674	249	2017
871	114	2018
10363	828	2016
22758	537	2016
23528	443	2018
4739	910	2016
15453	927	2017
16608	875	2015
23530	272	2018
1088	105	2018
24018	238	2016
13194	1037	2018
2991	209	2018
14873	341	2017
6911	741	2018
873	140	2018
31438	153	2018
5088	354	2016
2218	1244	2018
24015	242	2016
8877	874	2018
23683	267	2018
10693	834	2014
26776	105	2018
609	143	2018
7143	1344	2016
14446	362	2017
16659	867	2015
22900	539	2017
15714	878	2017
21497	93	2017
23586	340	2018
21885	1617	2013
9644	824	2017
12528	672	2018
22134	526	2017
15041	137	2017
23688	271	2018
16355	912	2016
10573	803	2015
1097	104	2018
25461	212	2017
3138	1039	2017
10191	796	2016
26864	168	2018
9233	1038	2018
23435	416	2018
4522	320	2017
13336	926	2018
9834	822	2017
13266	922	2017
24069	261	2016
23543	264	2018
15894	207	2017
2957	387	2018
12372	391	2018
23667	254	2018
24055	235	2016
10332	779	2016
2691	1471	2018
14979	227	2017
23437	303	2018
9658	131	2017
23540	272	2018
31542	67	2018
23681	264	2018
32957	96	2018
3470	184	2018
10112	780	2017
32202	65	2018
23084	355	2016
10581	759	2015
23272	739	2018
26588	3526	2014
10441	756	2015
15642	895	2017
9785	766	2017
25566	1075	2016
3460	157	2018
23171	352	2016
9379	849	2018
869	130	2018
23966	239	2017
28325	466	2017
1169	131	2018
9328	914	2018
9846	751	2017
23713	219	2017
3678	169	2017
415	360	2018
10111	799	2017
23108	511	2016
23545	234	2018
10097	735	2017
23855	214	2017
625	157	2018
9653	127	2017
1023	121	2018
5038	276	2016
16454	864	2016
11529	974	2015
10049	748	2017
31547	289	2018
14654	167	2017
22450	612	2018
23601	223	2018
30767	707	2015
14642	1036	2017
995	130	2018
23579	237	2018
16094	939	2016
22584	675	2017
27024	86	2018
13616	199	2018
23712	252	2017
31051	844	2016
15353	877	2017
22080	852	2018
14986	172	2017
13688	162	2018
16301	302	2016
1096	126	2018
15373	887	2017
3568	399	2017
26738	157	2018
26889	108	2018
13902	163	2018
23763	232	2017
10351	751	2016
3853	954	2017
26950	109	2018
1552	91	2017
30648	778	2017
7052	364	2018
9562	769	2017
23949	201	2017
14074	322	2017
12885	206	2018
2599	149	2018
14717	147	2017
463	534	2018
16166	855	2016
418	120	2018
4454	151	2017
23875	205	2017
5243	1080	2015
14002	876	2017
15797	877	2017
9257	718	2017
9918	735	2017
23725	196	2017
965	148	2018
4160	110	2017
9915	778	2017
602	161	2018
23523	347	2018
22642	161	2017
13577	887	2017
823	140	2018
10706	685	2014
1347	115	2018
23603	205	2018
15689	894	2017
9581	741	2017
23383	208	2018
32695	322	2018
15360	875	2017
6491	1228	2016
9582	788	2017
1276	91	2018
12993	928	2018
23718	204	2017
1830	814	2018
9616	699	2017
15454	887	2017
23399	324	2018
23913	189	2017
10564	713	2015
23447	266	2018
676	145	2018
2245	337	2018
23644	224	2018
10258	663	2016
10233	735	2016
9786	664	2016
23878	211	2017
13063	896	2017
1106	156	2018
26574	735	2014
9979	656	2017
9580	856	2017
5678	1501	2014
22752	398	2017
12914	851	2017
13509	125	2017
1292	399	2018
3758	159	2017
23757	207	2017
23373	232	2018
10307	652	2015
13588	136	2018
10075	121	2017
509	168	2018
4862	890	2016
23531	328	2018
10305	635	2016
10666	630	2015
22917	381	2017
23011	372	2017
23782	195	2017
9329	764	2018
9239	713	2016
[truncated: 35,564 more rows]
