# Supplementary material for: Tracking the popularity and outcomes of all bioRxiv preprints
Source: eLife journal article supplement (doi:10.7554/elife.45133), 2019-04-24
Supplement: supp [file elife-45133-supp-v1.zip › elife_poa_e45133_Figure_2_source_data_1.csv]

article	collection	downloads
11009	biochemistry	306
25574	evolutionary biology	296
1010	microbiology	75
852	microbiology	88
14984	neuroscience	460
547	microbiology	121
5027	bioinformatics	344
26821	molecular biology	749
549	microbiology	74
673	microbiology	101
16835	epidemiology	45
27528	molecular biology	1143
32983	neuroscience	1907
13407	neuroscience	693
18200	bioengineering	567
1431	microbiology	435
26932	molecular biology	803
25281	evolutionary biology	358
14605	neuroscience	3030
753	microbiology	52
7217	genomics	573
31356	microbiology	64
6824	genomics	430
16829	epidemiology	37
25889	evolutionary biology	292
16717	neuroscience	701
441	microbiology	59
18181	bioengineering	232
1763	genomics	83
27195	molecular biology	562
18029	bioengineering	243
27153	molecular biology	559
26735	molecular biology	1252
27220	molecular biology	579
412	microbiology	112
25102	evolutionary biology	333
18058	bioengineering	1091
7504	genomics	874
27308	molecular biology	541
18865	ecology	984
5215	bioinformatics	328
19693	immunology	73
18071	bioengineering	152
16132	neuroscience	1624
16748	epidemiology	60
17203	epidemiology	434
27177	molecular biology	711
23275	developmental biology	1077
26733	molecular biology	956
31307	genomics	93
14263	neuroscience	482
25848	evolutionary biology	310
16731	epidemiology	45
25643	evolutionary biology	297
16769	epidemiology	53
8901	genetics	165
26967	molecular biology	587
1780	genomics	644
27336	molecular biology	493
19674	immunology	67
19644	immunology	73
26818	molecular biology	546
15100	neuroscience	500
24643	evolutionary biology	223
18612	ecology	185
7182	genomics	2611
27448	molecular biology	514
16745	epidemiology	32
27189	molecular biology	510
25265	evolutionary biology	308
7477	genomics	551
8380	genomics	822
25091	evolutionary biology	313
24621	evolutionary biology	346
16739	epidemiology	47
17190	epidemiology	261
25613	evolutionary biology	294
24546	evolutionary biology	318
16729	epidemiology	72
17308	epidemiology	482
3397	bioinformatics	423
17142	epidemiology	394
16654	neuroscience	492
24961	evolutionary biology	295
17325	epidemiology	183
17177	epidemiology	504
26188	evolutionary biology	479
2846	bioinformatics	558
6035	microbiology	426
26337	evolutionary biology	286
25942	evolutionary biology	280
17249	epidemiology	309
18231	bioengineering	20588
26488	evolutionary biology	280
17801	bioengineering	159
13017	neuroscience	393
18118	bioengineering	2280
12748	neuroscience	598
16578	neuroscience	1052
27113	molecular biology	736
16984	epidemiology	230
16589	neuroscience	388
27370	molecular biology	458
14255	neuroscience	1054
4117	bioinformatics	317
17222	epidemiology	515
18742	ecology	608
4737	bioinformatics	317
16646	neuroscience	1020
24342	evolutionary biology	368
27232	molecular biology	503
32809	cancer biology	98
13490	neuroscience	1044
27273	molecular biology	479
8099	genomics	491
26973	molecular biology	475
16724	epidemiology	80
17120	epidemiology	341
6973	genomics	291
8443	genomics	501
16331	neuroscience	1062
7264	genomics	866
17237	epidemiology	222
2756	bioinformatics	518
19430	ecology	542
23126	cell biology	824
22537	cell biology	517
26086	evolutionary biology	282
24996	evolutionary biology	316
24473	evolutionary biology	420
15226	neuroscience	418
19251	ecology	521
24837	evolutionary biology	661
27367	molecular biology	418
27495	molecular biology	415
5113	bioinformatics	1382
22856	cell biology	498
9755	genetics	141
26865	molecular biology	490
7258	genomics	878
27046	molecular biology	171
27214	molecular biology	395
19140	ecology	515
18937	ecology	509
10636	genetics	2146
26901	molecular biology	474
27146	molecular biology	424
22583	cell biology	505
25182	evolutionary biology	284
27247	molecular biology	434
26736	molecular biology	464
26778	molecular biology	503
31569	epidemiology	68
25744	evolutionary biology	284
18619	ecology	713
23124	cell biology	502
25334	evolutionary biology	282
27365	molecular biology	382
13832	neuroscience	443
7781	genomics	1704
22019	cell biology	582
17125	epidemiology	297
18298	ecology	491
32865	evolutionary biology	114
24468	evolutionary biology	186
28494	plant biology	5581
27458	molecular biology	371
27394	molecular biology	392
25531	evolutionary biology	287
27513	molecular biology	363
5326	bioinformatics	1326
9690	genetics	237
26787	molecular biology	716
24753	evolutionary biology	434
5349	bioinformatics	1235
24858	evolutionary biology	286
4492	bioinformatics	322
27419	molecular biology	367
23143	cell biology	480
27314	molecular biology	361
26799	molecular biology	519
18492	ecology	542
19460	ecology	405
27498	molecular biology	363
9423	genetics	297
23122	cell biology	452
32305	epidemiology	43
26887	molecular biology	749
27083	molecular biology	468
18816	ecology	529
24750	evolutionary biology	411
22521	cell biology	380
27445	molecular biology	370
32913	microbiology	63
24970	evolutionary biology	315
32879	genetics	382
25673	evolutionary biology	284
22730	cell biology	351
10668	genetics	719
26827	molecular biology	88
27512	molecular biology	341
24829	evolutionary biology	216
27429	molecular biology	347
15045	neuroscience	1545
27327	molecular biology	370
27397	molecular biology	336
26098	evolutionary biology	285
5047	bioinformatics	1178
22237	cell biology	402
19243	ecology	354
22315	cell biology	357
8883	genetics	86
8997	genetics	123
27099	molecular biology	483
31571	epidemiology	40
27040	molecular biology	378
24572	evolutionary biology	370
10327	genetics	262
24929	evolutionary biology	470
6763	microbiology	861
25748	evolutionary biology	296
27323	molecular biology	327
27406	molecular biology	339
27379	molecular biology	328
22545	cell biology	399
25105	evolutionary biology	311
30946	biophysics	546
27507	molecular biology	323
24906	evolutionary biology	113
27059	molecular biology	405
5084	bioinformatics	325
7274	genomics	852
10210	genetics	553
31028	biophysics	202
27320	molecular biology	331
24063	developmental biology	885
1275	microbiology	626
27383	molecular biology	316
8918	genetics	297
27359	molecular biology	322
25851	evolutionary biology	280
27268	molecular biology	328
31745	microbiology	90
27249	molecular biology	325
26987	molecular biology	391
12183	neuroscience	187
16259	neuroscience	146
26728	molecular biology	122
24885	evolutionary biology	389
10522	genetics	526
25561	evolutionary biology	288
12462	neuroscience	154
24818	evolutionary biology	143
24785	evolutionary biology	275
24424	evolutionary biology	380
31792	pharmacology and toxicology	85
27267	molecular biology	308
9678	genetics	221
22888	cell biology	287
26830	molecular biology	524
27382	molecular biology	306
26360	evolutionary biology	196
9015	genetics	633
8663	genomics	490
13217	neuroscience	1109
27309	molecular biology	346
8348	genomics	495
9183	genetics	76
27244	molecular biology	304
9061	genetics	152
27206	molecular biology	387
32133	microbiology	78
27135	molecular biology	247
9539	genetics	268
27279	molecular biology	340
25280	evolutionary biology	269
27108	molecular biology	360
27425	molecular biology	288
23469	developmental biology	1014
25458	evolutionary biology	297
31670	ecology	63
5233	bioinformatics	924
10463	genetics	525
27178	molecular biology	368
27194	molecular biology	323
13718	neuroscience	829
9609	genetics	564
9083	genetics	1218
25515	evolutionary biology	296
27417	molecular biology	298
10521	genetics	1050
10632	genetics	512
26870	molecular biology	395
26113	evolutionary biology	275
27363	molecular biology	278
24527	evolutionary biology	90
24196	evolutionary biology	103
27354	molecular biology	278
24384	evolutionary biology	102
24719	evolutionary biology	288
27105	molecular biology	277
27358	molecular biology	290
26726	molecular biology	370
22365	cell biology	260
25572	evolutionary biology	275
25072	evolutionary biology	307
27160	molecular biology	274
22352	cell biology	297
23181	cell biology	791
32134	microbiology	58
27292	molecular biology	257
27294	molecular biology	268
10626	genetics	505
10077	genetics	273
5106	bioinformatics	371
27347	molecular biology	267
10444	genetics	522
9556	genetics	275
27515	molecular biology	244
24338	evolutionary biology	325
9478	genetics	629
2005	genomics	2151
9496	genetics	657
27128	molecular biology	314
10418	genetics	830
9933	genetics	6664
27449	molecular biology	256
25421	evolutionary biology	286
9436	genetics	316
27217	molecular biology	261
18953	ecology	285
24689	evolutionary biology	307
12062	neuroscience	218
27400	molecular biology	250
9838	genetics	460
27334	molecular biology	266
9732	genetics	6374
5616	bioinformatics	790
10064	genetics	520
9741	genetics	126
10165	genetics	812
32956	neuroscience	106
10397	genetics	376
9252	genetics	1005
25302	evolutionary biology	290
10086	genetics	563
31598	neuroscience	204
31600	neuroscience	79
9214	genetics	150
31780	neuroscience	158
26131	evolutionary biology	268
8722	genomics	504
15803	neuroscience	404
24119	developmental biology	868
30127	paleontology	252
27175	molecular biology	250
1737	genomics	292
32172	neuroscience	353
27330	molecular biology	298
27253	molecular biology	236
27549	pharmacology and toxicology	183
9046	genetics	171
20093	pathology	276
31783	neuroscience	715
31810	zoology	48
27066	molecular biology	265
20059	pathology	322
31622	bioengineering	70
6163	microbiology	576
7567	genomics	231
3108	bioinformatics	2037
10171	genetics	550
3146	bioinformatics	322
25704	evolutionary biology	765
24932	evolutionary biology	285
27123	molecular biology	194
31634	bioinformatics	156
3773	bioinformatics	279
24805	evolutionary biology	272
20075	pathology	249
12997	neuroscience	199
26925	molecular biology	353
23309	developmental biology	1420
26845	molecular biology	352
1811	genomics	303
31784	neuroscience	300
27729	pharmacology and toxicology	423
27493	molecular biology	217
25257	evolutionary biology	272
4357	bioinformatics	704
1825	genomics	290
7746	genomics	182
27340	molecular biology	227
27436	molecular biology	213
26905	molecular biology	230
23418	developmental biology	211
26942	molecular biology	285
26852	molecular biology	343
27095	molecular biology	203
26823	molecular biology	314
10685	genetics	519
27325	molecular biology	207
9869	genetics	576
10602	genetics	494
32188	neuroscience	77
32340	neuroscience	466
9255	genetics	699
24607	evolutionary biology	364
23838	developmental biology	897
25861	evolutionary biology	264
29740	systems biology	463
32192	neuroscience	1322
27295	molecular biology	253
27098	molecular biology	192
26983	molecular biology	163
26840	molecular biology	288
26978	molecular biology	451
26750	molecular biology	188
26956	molecular biology	176
27219	molecular biology	169
27371	molecular biology	163
7804	genomics	670
23385	developmental biology	173
7107	genomics	517
27414	molecular biology	152
31758	molecular biology	807
15933	neuroscience	1032
27231	molecular biology	158
27064	molecular biology	183
5155	bioinformatics	2492
27427	molecular biology	224
2994	bioinformatics	1686
27014	molecular biology	199
5396	bioinformatics	606
25252	evolutionary biology	278
26913	molecular biology	161
27183	molecular biology	141
8444	genomics	1907
22918	cell biology	200
26563	evolutionary biology	259
24759	evolutionary biology	268
27120	molecular biology	173
7720	genomics	521
27822	plant biology	187
27300	molecular biology	153
27081	molecular biology	151
1462	microbiology	127
10682	genetics	502
21936	cell biology	160
22421	cell biology	341
26147	evolutionary biology	274
26834	molecular biology	163
26793	molecular biology	225
9574	genetics	549
27411	molecular biology	118
26999	molecular biology	136
22398	cell biology	86
7493	genomics	670
10614	genetics	498
27034	molecular biology	143
8029	genomics	633
9874	genetics	498
26968	molecular biology	153
27096	molecular biology	134
26187	evolutionary biology	379
27283	molecular biology	112
1707	genomics	258
24706	evolutionary biology	237
10178	genetics	502
25761	evolutionary biology	196
22626	cell biology	758
27069	molecular biology	112
9714	genetics	499
27004	molecular biology	120
12863	neuroscience	138
24118	developmental biology	787
25088	evolutionary biology	284
26780	molecular biology	281
3606	bioinformatics	201
24305	evolutionary biology	517
26586	evolutionary biology	259
26811	molecular biology	190
26195	evolutionary biology	1120
23434	developmental biology	872
14710	neuroscience	1144
10274	genetics	492
26783	molecular biology	143
23169	cell biology	536
12897	neuroscience	684
25965	evolutionary biology	261
27162	molecular biology	94
22935	cell biology	11151
22576	cell biology	387
25908	evolutionary biology	276
23208	cell biology	9502
26857	molecular biology	132
9414	genetics	1148
26761	molecular biology	385
9540	genetics	783
10115	genetics	474
27114	molecular biology	106
26841	molecular biology	115
26976	molecular biology	119
26815	molecular biology	265
8045	genomics	601
24561	evolutionary biology	290
27043	molecular biology	250
9880	genetics	469
10298	genetics	462
12599	neuroscience	1951
11324	biochemistry	294
13288	neuroscience	1042
24985	evolutionary biology	274
26266	evolutionary biology	253
27227	molecular biology	88
27070	molecular biology	86
24786	evolutionary biology	274
26766	molecular biology	116
15262	neuroscience	1412
27037	molecular biology	90
25556	evolutionary biology	275
26156	evolutionary biology	252
26964	molecular biology	84
26335	evolutionary biology	2222
4890	bioinformatics	945
19958	immunology	278
26912	molecular biology	97
26107	evolutionary biology	247
26997	molecular biology	81
7416	genomics	450
26807	molecular biology	83
4148	bioinformatics	327
27132	molecular biology	74
26890	molecular biology	72
8786	genomics	508
4836	bioinformatics	782
26990	molecular biology	106
23205	cell biology	2843
26763	molecular biology	96
7007	genomics	3974
26767	molecular biology	77
8101	genomics	430
27009	molecular biology	106
25371	evolutionary biology	264
26879	molecular biology	83
26906	molecular biology	66
22772	cell biology	9556
16579	neuroscience	981
26703	molecular biology	120
7766	genomics	456
25725	evolutionary biology	252
27013	molecular biology	223
26788	molecular biology	288
26351	evolutionary biology	1800
32551	genomics	492
32023	bioinformatics	89
22348	cell biology	9838
26773	molecular biology	43
26877	molecular biology	46
6890	genomics	315
24633	evolutionary biology	377
26806	molecular biology	52
26745	molecular biology	54
7473	genomics	873
13877	neuroscience	395
26757	molecular biology	46
26698	molecular biology	209
26707	molecular biology	60
15994	neuroscience	451
31513	molecular biology	117
2387	bioinformatics	104
31757	molecular biology	50
31755	molecular biology	39
23818	developmental biology	907
2616	bioinformatics	294
25658	evolutionary biology	232
22789	cell biology	681
27345	molecular biology	0
32894	genomics	105
25419	evolutionary biology	252
6798	genomics	528
16429	neuroscience	1793
14036	neuroscience	109309
26285	evolutionary biology	187
14172	neuroscience	674
25772	evolutionary biology	265
13873	neuroscience	19117
16359	neuroscience	1835
24670	evolutionary biology	381
15728	neuroscience	2649
16258	neuroscience	7669
16610	neuroscience	6792
28107	plant biology	230
28205	plant biology	356
26134	evolutionary biology	246
25064	evolutionary biology	316
4092	bioinformatics	250
14952	neuroscience	6985
4272	bioinformatics	507
7116	genomics	210
26055	evolutionary biology	245
5348	bioinformatics	247
23733	developmental biology	791
15330	neuroscience	6467
16723	neuroscience	1372
16709	neuroscience	5541
32028	bioinformatics	96
22191	cell biology	3288
3184	bioinformatics	141
27271	molecular biology	209
25248	evolutionary biology	261
27121	molecular biology	201
4912	bioinformatics	489
22378	cell biology	2442
16344	neuroscience	6033
1946	genomics	574
25188	evolutionary biology	257
2847	bioinformatics	1375
13001	neuroscience	6440
26496	evolutionary biology	718
23346	developmental biology	1088
4503	bioinformatics	687
14689	neuroscience	5128
4359	bioinformatics	493
22867	cell biology	1814
27203	molecular biology	159
16054	neuroscience	4067
18838	ecology	535
32035	bioinformatics	166
26676	evolutionary biology	241
4195	bioinformatics	250
24977	evolutionary biology	300
16389	neuroscience	3669
1622	genomics	667
32912	microbiology	66
4564	bioinformatics	606
767	microbiology	208
6802	genomics	92
3070	bioinformatics	817
16703	neuroscience	3668
14924	neuroscience	3544
14225	neuroscience	3985
20483	animal behavior and cognition	200
4664	bioinformatics	805
15739	neuroscience	1907
15630	neuroscience	3352
26923	molecular biology	212
26423	evolutionary biology	254
4110	bioinformatics	261
15972	neuroscience	2043
22842	cell biology	1828
14899	neuroscience	3378
3574	bioinformatics	236
13884	neuroscience	4660
7790	genomics	337
15577	neuroscience	2188
16682	neuroscience	3140
15693	neuroscience	3216
14947	neuroscience	3052
15032	neuroscience	3123
27179	molecular biology	198
10601	genetics	2782
7553	genomics	495
14649	neuroscience	3488
22714	cell biology	1709
15173	neuroscience	3084
32921	microbiology	59
7370	genomics	528
8603	genomics	514
13100	neuroscience	3535
16670	neuroscience	2914
8546	genomics	648
15871	neuroscience	2940
27023	molecular biology	335
19698	immunology	434
12826	neuroscience	3320
7151	genomics	425
15505	neuroscience	2834
14670	neuroscience	1631
23144	cell biology	1682
14507	neuroscience	2909
3865	bioinformatics	270
13513	neuroscience	3327
14900	neuroscience	2802
12492	neuroscience	3324
13420	neuroscience	3287
15164	neuroscience	2663
13032	neuroscience	3173
15897	neuroscience	2565
12125	neuroscience	2692
15655	neuroscience	2744
26936	molecular biology	425
12033	neuroscience	2861
15370	neuroscience	2465
16440	neuroscience	2451
16644	neuroscience	2312
16471	neuroscience	2265
16643	neuroscience	2293
31280	genomics	81
23904	developmental biology	96
16706	neuroscience	2143
14123	neuroscience	2717
7095	genomics	783
15579	neuroscience	2169
13510	neuroscience	2236
20005	immunology	527
15558	neuroscience	2008
13027	neuroscience	2042
15677	neuroscience	2024
23417	developmental biology	144
13361	neuroscience	2190
14638	neuroscience	2247
8127	genomics	630
12175	neuroscience	113
16679	neuroscience	1837
13874	neuroscience	3946
7508	genomics	541
16292	neuroscience	1828
16539	neuroscience	1589
2475	bioinformatics	819
15824	neuroscience	1785
1624	genomics	878
16237	neuroscience	1694
13828	neuroscience	1881
22720	cell biology	1499
15989	neuroscience	1666
14479	neuroscience	1698
22567	cell biology	1473
2882	bioinformatics	312
13738	neuroscience	1935
32944	neuroscience	422
3562	bioinformatics	1330
13363	neuroscience	1797
12222	neuroscience	2058
25745	evolutionary biology	243
26252	evolutionary biology	238
26154	evolutionary biology	238
25038	evolutionary biology	272
25805	evolutionary biology	245
23203	cell biology	1163
24665	evolutionary biology	282
24934	evolutionary biology	265
14190	neuroscience	2054
1268	microbiology	453
25381	evolutionary biology	252
24435	evolutionary biology	346
22395	cell biology	1106
16450	neuroscience	1400
26247	evolutionary biology	240
24957	evolutionary biology	257
24327	evolutionary biology	278
11721	neuroscience	426
15299	neuroscience	1617
22687	cell biology	1060
13521	neuroscience	161
24339	evolutionary biology	253
25664	evolutionary biology	235
6870	genomics	145
28674	scientific communication and education	2160
24833	evolutionary biology	245
25158	evolutionary biology	255
16155	neuroscience	1712
25873	evolutionary biology	228
15710	neuroscience	1682
15632	neuroscience	1009
16218	neuroscience	814
24630	evolutionary biology	248
3595	bioinformatics	259
14785	neuroscience	147
15688	neuroscience	1581
3869	bioinformatics	315
14068	neuroscience	1062
26723	molecular biology	319
8685	genomics	489
25808	evolutionary biology	232
24359	evolutionary biology	342
27156	molecular biology	422
24240	evolutionary biology	304
23618	developmental biology	998
24815	evolutionary biology	263
11917	neuroscience	128
24220	evolutionary biology	368
24507	evolutionary biology	284
13763	neuroscience	1661
24355	evolutionary biology	232
15802	neuroscience	1371
23069	cell biology	1026
25695	evolutionary biology	221
7228	genomics	705
13579	neuroscience	1585
26004	evolutionary biology	224
25328	evolutionary biology	258
16213	neuroscience	1506
27005	molecular biology	246
12359	neuroscience	387
16796	epidemiology	265
14695	neuroscience	1635
30444	biophysics	112
16642	neuroscience	1468
22834	cell biology	1031
7380	genomics	282
33102	neuroscience	115
26547	evolutionary biology	219
25320	evolutionary biology	233
26260	evolutionary biology	217
25503	evolutionary biology	238
19745	immunology	143
25794	evolutionary biology	228
24442	evolutionary biology	273
8362	genomics	274
26061	evolutionary biology	218
3736	bioinformatics	278
26294	evolutionary biology	219
17213	epidemiology	215
26073	evolutionary biology	230
4083	bioinformatics	238
26765	molecular biology	212
25603	evolutionary biology	224
4461	bioinformatics	974
22809	cell biology	1195
4612	bioinformatics	1244
22910	cell biology	903
22829	cell biology	933
25234	evolutionary biology	241
26041	evolutionary biology	228
32318	immunology	245
18019	bioengineering	321
8693	genomics	259
25554	evolutionary biology	209
5074	bioinformatics	751
15407	neuroscience	1529
15801	neuroscience	1004
25123	evolutionary biology	229
24124	developmental biology	743
19220	ecology	1005
27193	molecular biology	170
24738	evolutionary biology	239
3983	bioinformatics	397
2819	bioinformatics	259
27016	molecular biology	194
25150	evolutionary biology	217
14386	neuroscience	1648
24441	evolutionary biology	259
24319	evolutionary biology	220
4042	bioinformatics	323
3192	bioinformatics	394
23068	cell biology	929
1681	genomics	1942
15934	neuroscience	1437
5771	bioinformatics	1207
28530	plant biology	657
11891	neuroscience	1484
23044	cell biology	927
26218	evolutionary biology	213
26438	evolutionary biology	215
25229	evolutionary biology	231
24548	evolutionary biology	296
26831	molecular biology	191
19734	immunology	308
4631	bioinformatics	1277
26378	evolutionary biology	210
7772	genomics	1663
27278	molecular biology	155
15730	neuroscience	1741
28543	scientific communication and education	291
4691	bioinformatics	369
14298	neuroscience	1537
4332	bioinformatics	1252
26069	evolutionary biology	212
25683	evolutionary biology	165
22994	cell biology	619
25966	evolutionary biology	209
26953	molecular biology	176
26046	evolutionary biology	209
32746	scientific communication and education	225
23900	developmental biology	866
25640	evolutionary biology	208
2270	bioinformatics	312
24253	evolutionary biology	302
22418	cell biology	972
24321	evolutionary biology	309
19920	immunology	262
23133	cell biology	895
24358	evolutionary biology	301
5555	bioinformatics	1185
31206	bioinformatics	941
24835	evolutionary biology	253
25262	evolutionary biology	212
19622	immunology	229
26878	molecular biology	158
12682	neuroscience	1623
16538	neuroscience	1433
1793	genomics	388
19514	immunology	130
14470	neuroscience	1572
23028	cell biology	861
25175	evolutionary biology	219
24931	evolutionary biology	210
25553	evolutionary biology	210
19862	immunology	243
13309	neuroscience	1547
4609	bioinformatics	1211
19738	immunology	2367
26042	evolutionary biology	196
25154	evolutionary biology	225
3273	bioinformatics	218
24033	developmental biology	717
24895	evolutionary biology	247
2021	genomics	265
1816	genomics	1378
24244	evolutionary biology	300
25362	evolutionary biology	207
24700	evolutionary biology	293
24756	evolutionary biology	207
19526	immunology	508
5145	bioinformatics	1171
15130	neuroscience	1488
25210	evolutionary biology	205
23021	cell biology	818
2665	bioinformatics	373
23229	cell biology	808
19957	immunology	161
25804	evolutionary biology	209
22855	cell biology	871
33416	plant biology	30
24641	evolutionary biology	215
23047	cell biology	802
26082	evolutionary biology	194
23031	cell biology	1404
25364	evolutionary biology	202
24651	evolutionary biology	258
2008	genomics	426
4870	bioinformatics	1155
24765	evolutionary biology	241
23224	cell biology	772
25399	evolutionary biology	197
26065	evolutionary biology	194
26824	molecular biology	313
26072	evolutionary biology	190
15857	neuroscience	1247
25143	evolutionary biology	216
25172	evolutionary biology	218
25289	evolutionary biology	196
4116	bioinformatics	191
24646	evolutionary biology	285
1157	microbiology	161
26382	evolutionary biology	190
24946	evolutionary biology	190
21989	cell biology	1034
23804	developmental biology	833
4353	bioinformatics	227
4938	bioinformatics	287
25897	evolutionary biology	186
23687	developmental biology	763
24836	evolutionary biology	247
29247	systems biology	1603
16078	neuroscience	232
23110	cell biology	731
25141	evolutionary biology	202
24901	evolutionary biology	197
16628	neuroscience	1364
4186	bioinformatics	304
19906	immunology	74
25661	evolutionary biology	192
32265	animal behavior and cognition	67
23240	developmental biology	1008
3409	bioinformatics	353
24583	evolutionary biology	219
25413	evolutionary biology	197
24954	evolutionary biology	200
24856	evolutionary biology	207
24090	developmental biology	697
25544	evolutionary biology	190
27151	molecular biology	144
24775	evolutionary biology	189
25724	evolutionary biology	182
19573	immunology	75
22914	cell biology	797
24252	evolutionary biology	356
25063	evolutionary biology	197
27033	molecular biology	134
2870	bioinformatics	353
28892	synthetic biology	488
23715	developmental biology	782
24233	evolutionary biology	201
25986	evolutionary biology	174
26774	molecular biology	154
1630	genomics	217
24577	evolutionary biology	189
25757	evolutionary biology	174
19617	immunology	79
25728	evolutionary biology	176
19879	immunology	219
19882	immunology	206
24495	evolutionary biology	355
23621	developmental biology	706
31232	bioinformatics	266
16426	neuroscience	1366
24612	evolutionary biology	335
25149	evolutionary biology	190
24400	evolutionary biology	245
27626	pharmacology and toxicology	361
15334	neuroscience	243
24419	evolutionary biology	218
15197	neuroscience	469
27303	molecular biology	446
24883	evolutionary biology	192
24322	evolutionary biology	253
23908	developmental biology	691
25372	evolutionary biology	184
23867	developmental biology	688
16319	neuroscience	564
23796	developmental biology	673
24588	evolutionary biology	204
14517	neuroscience	523
25776	evolutionary biology	172
5779	bioinformatics	299
25329	evolutionary biology	196
15410	neuroscience	1402
4124	bioinformatics	315
25325	evolutionary biology	168
5296	bioinformatics	1102
24863	evolutionary biology	215
24406	evolutionary biology	195
26048	evolutionary biology	169
15785	neuroscience	490
3557	bioinformatics	102
24661	evolutionary biology	181
2714	bioinformatics	263
13216	neuroscience	1458
15990	neuroscience	1348
27233	molecular biology	125
19793	immunology	223
14224	neuroscience	1479
14634	neuroscience	260
26015	evolutionary biology	161
1650	genomics	238
26354	evolutionary biology	161
32325	microbiology	94
25647	evolutionary biology	185
15279	neuroscience	1439
25513	evolutionary biology	159
6897	genomics	202
32332	molecular biology	421
23403	developmental biology	104
23636	developmental biology	691
25674	evolutionary biology	162
14494	neuroscience	1437
25415	evolutionary biology	165
15758	neuroscience	1462
23095	cell biology	222
14046	neuroscience	528
24975	evolutionary biology	182
26986	molecular biology	121
16720	neuroscience	1304
33069	epidemiology	71
16665	neuroscience	1373
25423	evolutionary biology	159
25478	evolutionary biology	147
25003	evolutionary biology	158
19937	immunology	157
14029	neuroscience	1379
26899	molecular biology	149
16246	neuroscience	1196
25002	evolutionary biology	185
15021	neuroscience	464
24642	evolutionary biology	149
14089	neuroscience	1357
24445	evolutionary biology	189
5639	bioinformatics	1109
25174	evolutionary biology	142
24452	evolutionary biology	199
32350	neuroscience	37
16378	neuroscience	412
16326	neuroscience	1304
2745	bioinformatics	178
24590	evolutionary biology	165
25653	evolutionary biology	138
12870	neuroscience	1433
24675	evolutionary biology	179
10847	biochemistry	150
22284	cell biology	880
26822	molecular biology	162
23347	developmental biology	672
1927	genomics	1899
2960	bioinformatics	201
24625	evolutionary biology	188
3140	bioinformatics	218
26276	evolutionary biology	133
5065	bioinformatics	699
15159	neuroscience	1422
32264	animal behavior and cognition	571
24438	evolutionary biology	151
23907	developmental biology	696
25185	evolutionary biology	166
6014	microbiology	303
32270	bioengineering	223
26713	molecular biology	287
4945	bioinformatics	268
23993	developmental biology	682
22135	cell biology	756
24716	evolutionary biology	157
25205	evolutionary biology	137
4885	bioinformatics	252
25473	evolutionary biology	129
23998	developmental biology	659
25864	evolutionary biology	135
4051	bioinformatics	284
16236	neuroscience	415
15419	neuroscience	1315
25406	evolutionary biology	140
32081	ecology	64
24774	evolutionary biology	164
25545	evolutionary biology	129
4022	bioinformatics	247
25311	evolutionary biology	127
23734	developmental biology	777
24417	evolutionary biology	183
15858	neuroscience	478
25077	evolutionary biology	130
1191	microbiology	42
23035	cell biology	672
24177	evolutionary biology	144
32085	epidemiology	143
29369	systems biology	172
24521	evolutionary biology	156
15473	neuroscience	1320
23830	developmental biology	665
24263	evolutionary biology	133
15528	neuroscience	1283
24170	evolutionary biology	175
23802	developmental biology	630
3160	bioinformatics	255
4026	bioinformatics	286
25065	evolutionary biology	173
22530	cell biology	783
24857	evolutionary biology	129
16749	epidemiology	61
16189	neuroscience	1313
14611	neuroscience	489
4003	bioinformatics	388
24769	evolutionary biology	163
1723	genomics	152
16257	neuroscience	323
24289	evolutionary biology	228
24579	evolutionary biology	139
4079	bioinformatics	158
29017	synthetic biology	3699
26770	molecular biology	173
24846	evolutionary biology	126
23861	developmental biology	672
24357	evolutionary biology	134
14960	neuroscience	229
4192	bioinformatics	163
29115	systems biology	103
24494	evolutionary biology	161
22573	cell biology	718
23896	developmental biology	645
16530	neuroscience	1312
23050	cell biology	648
26071	evolutionary biology	115
4040	bioinformatics	1107
24600	evolutionary biology	124
7534	genomics	455
25425	evolutionary biology	124
24678	evolutionary biology	147
22599	cell biology	699
24842	evolutionary biology	117
3945	bioinformatics	147
31702	evolutionary biology	552
3709	bioinformatics	149
12187	neuroscience	1391
24222	evolutionary biology	274
15680	neuroscience	1278
29455	systems biology	1727
25906	evolutionary biology	107
24304	evolutionary biology	155
1827	genomics	111
23742	developmental biology	659
3730	bioinformatics	166
19484	immunology	176
25025	evolutionary biology	139
25412	evolutionary biology	107
16602	neuroscience	1237
31285	genomics	300
23995	developmental biology	662
24317	evolutionary biology	174
23699	developmental biology	685
24711	evolutionary biology	127
23648	developmental biology	714
32459	evolutionary biology	311
14782	neuroscience	1305
2591	bioinformatics	237
24201	evolutionary biology	172
25273	evolutionary biology	120
31701	evolutionary biology	467
24682	evolutionary biology	110
3966	bioinformatics	907
24125	developmental biology	603
24391	evolutionary biology	149
1973	genomics	66
6894	genomics	444
24896	evolutionary biology	114
24248	evolutionary biology	133
14735	neuroscience	1238
24768	evolutionary biology	125
14627	neuroscience	441
24477	evolutionary biology	154
16063	neuroscience	386
15115	neuroscience	386
24332	evolutionary biology	139
24736	evolutionary biology	97
22750	cell biology	185
23801	developmental biology	615
15047	neuroscience	427
12237	neuroscience	1873
25527	evolutionary biology	125
14996	neuroscience	378
23457	developmental biology	801
24538	evolutionary biology	108
14176	neuroscience	1382
27288	molecular biology	120
24109	developmental biology	587
15598	neuroscience	384
15520	neuroscience	1275
24734	evolutionary biology	106
26850	molecular biology	262
25354	evolutionary biology	100
19812	immunology	625
22212	cell biology	928
24667	evolutionary biology	123
24464	evolutionary biology	127
23573	developmental biology	588
26210	evolutionary biology	258
24574	evolutionary biology	126
24108	developmental biology	569
16518	neuroscience	1259
24388	evolutionary biology	113
15950	neuroscience	199
24313	evolutionary biology	121
23599	developmental biology	622
25202	evolutionary biology	95
15849	neuroscience	1232
13879	neuroscience	455
24414	evolutionary biology	135
24369	evolutionary biology	102
24129	developmental biology	569
19982	immunology	365
11979	neuroscience	515
24467	evolutionary biology	113
1821	genomics	56
24817	evolutionary biology	106
24231	evolutionary biology	100
20032	immunology	304
2512	bioinformatics	115
25183	evolutionary biology	87
13656	neuroscience	1545
5579	bioinformatics	1056
23978	developmental biology	587
27168	molecular biology	112
15273	neuroscience	1632
24257	evolutionary biology	1185
24489	evolutionary biology	133
24542	evolutionary biology	121
23819	developmental biology	567
24509	evolutionary biology	132
23865	developmental biology	589
24993	evolutionary biology	83
23449	developmental biology	683
25090	evolutionary biology	122
23184	cell biology	585
24593	evolutionary biology	117
23394	developmental biology	863
22704	cell biology	644
24616	evolutionary biology	130
24183	evolutionary biology	115
24398	evolutionary biology	113
13907	neuroscience	1223
24764	evolutionary biology	78
32299	developmental biology	551
24446	evolutionary biology	115
24834	evolutionary biology	86
22511	cell biology	676
32298	developmental biology	406
24645	evolutionary biology	79
32304	epidemiology	60
23515	developmental biology	682
14318	neuroscience	1284
23797	developmental biology	537
9700	genetics	184
4131	bioinformatics	232
24334	evolutionary biology	71
24236	evolutionary biology	122
13011	neuroscience	255
25080	evolutionary biology	61
5757	bioinformatics	1054
32302	ecology	57
19758	immunology	132
25084	evolutionary biology	71
24316	evolutionary biology	80
24336	evolutionary biology	87
31274	evolutionary biology	166
14254	neuroscience	223
23983	developmental biology	546
11530	biochemistry	1075
16444	neuroscience	1083
31706	evolutionary biology	182
24479	evolutionary biology	72
24664	evolutionary biology	72
24141	evolutionary biology	195
24238	evolutionary biology	84
3655	bioinformatics	806
24481	evolutionary biology	69
24776	evolutionary biology	48
16217	neuroscience	309
12221	neuroscience	474
16551	neuroscience	305
3547	bioinformatics	928
14700	neuroscience	1464
15636	neuroscience	295
24466	evolutionary biology	92
14845	neuroscience	299
24988	evolutionary biology	48
12553	neuroscience	311
24198	evolutionary biology	139
24451	evolutionary biology	53
31703	evolutionary biology	117
28572	scientific communication and education	260
23821	developmental biology	582
3230	bioinformatics	270
24174	evolutionary biology	67
31697	evolutionary biology	260
10561	genetics	32012
24258	evolutionary biology	62
11832	neuroscience	403
32314	genomics	206
31273	evolutionary biology	228
2597	bioinformatics	71
22678	cell biology	823
24264	evolutionary biology	68
3364	bioinformatics	129
24350	evolutionary biology	67
13205	neuroscience	382
27656	pharmacology and toxicology	240
32317	genomics	125
26930	molecular biology	153
32326	microbiology	38
24605	evolutionary biology	48
22311	cell biology	631
31963	evolutionary biology	140
24032	developmental biology	518
16203	neuroscience	282
24148	evolutionary biology	109
24172	evolutionary biology	58
31700	evolutionary biology	79
31964	evolutionary biology	197
31271	evolutionary biology	147
12970	neuroscience	1107
32327	microbiology	142
24157	evolutionary biology	95
31269	evolutionary biology	220
31695	evolutionary biology	205
31481	evolutionary biology	38
25445	evolutionary biology	171
11998	neuroscience	1249
16021	neuroscience	1259
23869	developmental biology	516
22586	cell biology	670
22770	cell biology	585
9821	genetics	10193
22884	cell biology	684
23186	cell biology	670
9322	genetics	6133
9852	genetics	6444
23645	developmental biology	586
22289	cell biology	882
32329	molecular biology	94
14009	neuroscience	325
22919	cell biology	621
15992	neuroscience	1289
10599	genetics	4983
22387	cell biology	712
32331	molecular biology	148
16275	neuroscience	1203
24458	evolutionary biology	110
10426	genetics	4321
4559	bioinformatics	1129
14534	neuroscience	1435
23960	developmental biology	567
22613	cell biology	628
32334	neuroscience	74
22876	cell biology	623
32335	neuroscience	180
22800	cell biology	583
20536	animal behavior and cognition	170
3483	bioinformatics	129
16690	neuroscience	1237
15074	neuroscience	1231
25052	evolutionary biology	168
1590	genomics	240
23137	cell biology	538
22403	cell biology	555
6788	genomics	469
10640	genetics	3215
25159	evolutionary biology	376
22716	cell biology	118
15403	neuroscience	204
22836	cell biology	476
4910	bioinformatics	1051
28336	plant biology	1121
28649	scientific communication and education	469
15954	neuroscience	564
9159	genetics	3427
23001	cell biology	488
23199	cell biology	460
18884	ecology	57
16362	neuroscience	1193
32093	evolutionary biology	71
16380	neuroscience	303
16138	neuroscience	1180
23019	cell biology	570
3383	bioinformatics	137
22275	cell biology	543
22255	cell biology	612
10407	genetics	2903
16028	neuroscience	1197
22316	cell biology	556
27965	plant biology	233
23165	cell biology	440
23082	cell biology	440
2773	bioinformatics	177
10621	genetics	2677
24674	evolutionary biology	125
502	microbiology	264
22444	cell biology	411
32341	neuroscience	62
9770	genetics	2618
14235	neuroscience	368
4159	bioinformatics	225
23851	developmental biology	695
32342	neuroscience	103
9524	genetics	2767
16507	neuroscience	1174
10062	genetics	2653
22819	cell biology	579
22706	cell biology	403
9890	genetics	1571
13258	neuroscience	1392
14073	neuroscience	973
12604	neuroscience	368
25514	evolutionary biology	495
1528	microbiology	125
24245	evolutionary biology	189
1121	microbiology	292
15451	neuroscience	1011
22606	cell biology	84
19517	immunology	148
23058	cell biology	398
22949	cell biology	411
9809	genetics	1477
10454	genetics	1363
1371	microbiology	122
22630	cell biology	449
19861	immunology	121
9270	genetics	1629
10544	genetics	1413
2342	bioinformatics	175
15066	neuroscience	241
23094	cell biology	382
12925	neuroscience	1199
3309	bioinformatics	84
9354	genetics	1749
10276	genetics	1441
22742	cell biology	411
3058	bioinformatics	150
9419	genetics	1487
16214	neuroscience	963
6902	genomics	399
14401	neuroscience	1042
22119	cell biology	253
27661	pharmacology and toxicology	207
15813	neuroscience	220
3069	bioinformatics	744
9476	genetics	1449
4481	bioinformatics	1047
23990	developmental biology	457
13401	neuroscience	1045
16411	neuroscience	959
11729	neuroscience	320
10528	genetics	1350
3566	bioinformatics	138
23894	developmental biology	492
5706	bioinformatics	775
24039	developmental biology	419
23736	developmental biology	436
27968	plant biology	338
23862	developmental biology	419
2935	bioinformatics	1026
1147	microbiology	221
9851	genetics	1371
13145	neuroscience	280
4352	bioinformatics	687
606	microbiology	152
24072	developmental biology	416
5177	bioinformatics	659
10288	genetics	1361
3262	bioinformatics	1006
4424	bioinformatics	117
10184	genetics	1465
23931	developmental biology	421
5024	bioinformatics	204
23271	developmental biology	468
23287	developmental biology	1077
2321	bioinformatics	507
23678	developmental biology	425
4068	bioinformatics	137
9611	genetics	1336
866	microbiology	133
583	microbiology	195
9243	genetics	1634
23957	developmental biology	404
1475	microbiology	101
5760	bioinformatics	932
23304	developmental biology	611
9415	genetics	1356
23853	developmental biology	410
4189	bioinformatics	697
24036	developmental biology	393
14086	neuroscience	188
4779	bioinformatics	969
3268	bioinformatics	766
23721	developmental biology	475
10067	genetics	1612
5174	bioinformatics	738
2571	bioinformatics	187
24026	developmental biology	395
23660	developmental biology	516
13943	neuroscience	1028
9195	genetics	1642
10109	genetics	1190
15963	neuroscience	1005
33302	cancer biology	81
4951	bioinformatics	950
23602	developmental biology	421
1083	microbiology	150
10582	genetics	1216
10293	genetics	1210
21135	cancer biology	305
3957	bioinformatics	1009
1014	microbiology	130
9177	genetics	1444
5659	bioinformatics	606
14051	neuroscience	1068
9959	genetics	1203
23812	developmental biology	424
31183	bioinformatics	259
23860	developmental biology	459
9964	genetics	1230
10452	genetics	1149
1135	microbiology	160
2538	bioinformatics	198
24052	developmental biology	378
13294	neuroscience	433
1358	microbiology	97
23176	cell biology	525
933	microbiology	284
9779	genetics	1336
579	microbiology	141
23416	developmental biology	823
2984	bioinformatics	258
9303	genetics	1446
16290	neuroscience	969
7607	genomics	513
25191	evolutionary biology	180
466	microbiology	351
15162	neuroscience	1114
1536	microbiology	220
9618	genetics	1150
23488	developmental biology	551
2209	bioinformatics	126
24029	developmental biology	380
11697	neuroscience	438
9318	genetics	1429
23560	developmental biology	459
23279	developmental biology	463
10466	genetics	1093
9199	genetics	1473
22592	cell biology	553
9993	genetics	1112
1028	microbiology	110
3229	bioinformatics	356
13533	neuroscience	436
24046	developmental biology	361
12299	neuroscience	1143
16358	neuroscience	934
9434	genetics	1186
9126	genetics	1229
10571	genetics	1074
9858	genetics	1152
9904	genetics	1147
2460	bioinformatics	246
10083	genetics	1095
10279	genetics	1104
14885	neuroscience	393
23588	developmental biology	364
1174	microbiology	135
716	microbiology	122
23486	developmental biology	378
2334	bioinformatics	52
3763	bioinformatics	979
654	microbiology	184
2918	bioinformatics	180
23656	developmental biology	429
10052	genetics	1046
10093	genetics	1112
3085	bioinformatics	208
14614	neuroscience	976
23563	developmental biology	870
23784	developmental biology	423
15129	neuroscience	2275
9704	genetics	1063
1416	microbiology	100
31213	bioinformatics	159
2108	genetics	1290
17934	bioengineering	420
23498	developmental biology	410
1114	microbiology	223
13492	neuroscience	1291
18368	ecology	86
12366	neuroscience	1156
3157	bioinformatics	234
19712	immunology	45
3225	bioinformatics	353
4594	bioinformatics	523
16225	neuroscience	949
6909	genomics	206
10654	genetics	1049
15808	neuroscience	406
23538	developmental biology	645
3289	bioinformatics	519
24058	developmental biology	347
21404	cancer biology	179
15892	neuroscience	953
2388	bioinformatics	135
10238	genetics	1037
13236	neuroscience	941
23940	developmental biology	337
8142	genomics	292
2513	bioinformatics	102
2758	bioinformatics	97
23743	developmental biology	341
14557	neuroscience	216
8993	genetics	1212
13562	neuroscience	1014
23669	developmental biology	350
12091	neuroscience	362
3992	bioinformatics	497
23884	developmental biology	326
10638	genetics	997
4295	bioinformatics	496
16546	neuroscience	934
10010	genetics	1014
1165	microbiology	241
2307	bioinformatics	118
23738	developmental biology	470
3593	bioinformatics	194
2930	bioinformatics	232
12565	neuroscience	255
29033	synthetic biology	398
10103	genetics	1117
10379	genetics	1004
16713	neuroscience	931
2458	bioinformatics	137
10625	genetics	1000
24035	developmental biology	300
4210	bioinformatics	501
16634	neuroscience	906
3635	bioinformatics	180
23922	developmental biology	306
10382	genetics	1003
10459	genetics	991
31610	animal behavior and cognition	193
8463	genomics	467
2311	bioinformatics	214
13755	neuroscience	388
10133	genetics	1041
19482	immunology	65
23467	developmental biology	391
16040	neuroscience	368
15860	neuroscience	381
26888	molecular biology	184
10587	genetics	977
16255	neuroscience	945
2775	bioinformatics	586
14421	neuroscience	434
778	microbiology	142
27161	molecular biology	90
951	microbiology	152
1876	genomics	870
2955	bioinformatics	95
9272	genetics	1026
23374	developmental biology	608
9762	genetics	1002
9895	genetics	984
9393	genetics	1014
15674	neuroscience	347
15431	neuroscience	929
3480	bioinformatics	80
23919	developmental biology	312
2319	bioinformatics	90
10037	genetics	972
2903	bioinformatics	108
23646	developmental biology	337
736	microbiology	232
28833	synthetic biology	516
23551	developmental biology	330
1063	microbiology	124
10728	genetics	926
15038	neuroscience	968
9727	genetics	960
8569	genomics	361
23814	developmental biology	296
23566	developmental biology	343
10300	genetics	943
13331	neuroscience	438
10697	genetics	917
14787	neuroscience	1148
23693	developmental biology	287
15325	neuroscience	341
15347	neuroscience	545
511	microbiology	140
9722	genetics	922
13983	neuroscience	975
9805	genetics	938
3641	bioinformatics	459
6209	microbiology	263
1418	microbiology	208
3001	bioinformatics	227
24752	evolutionary biology	207
4832	bioinformatics	415
25462	evolutionary biology	154
23319	developmental biology	380
5370	bioinformatics	1593
742	microbiology	302
23270	developmental biology	571
10146	genetics	912
23969	developmental biology	274
23572	developmental biology	321
1075	microbiology	103
27349	molecular biology	189
15355	neuroscience	912
3351	bioinformatics	189
19038	ecology	1573
488	microbiology	148
23673	developmental biology	392
9645	genetics	985
24006	developmental biology	264
13949	neuroscience	189
3249	bioinformatics	292
792	microbiology	178
23221	cell biology	504
5241	bioinformatics	396
15565	neuroscience	967
3213	bioinformatics	192
14883	neuroscience	160
23824	developmental biology	265
14220	neuroscience	373
9404	genetics	945
10158	genetics	878
5768	bioinformatics	930
22965	cell biology	381
10432	genetics	878
14058	neuroscience	925
23101	cell biology	373
9114	genetics	562
9782	genetics	935
24041	developmental biology	264
14989	neuroscience	349
3328	bioinformatics	1007
15806	neuroscience	355
10551	genetics	396
23938	developmental biology	263
16722	neuroscience	324
9008	genetics	1017
16388	neuroscience	917
2201	bioinformatics	64
23902	developmental biology	256
14320	neuroscience	332
876	microbiology	162
23984	developmental biology	262
4259	bioinformatics	961
16802	epidemiology	54
10153	genetics	994
15186	neuroscience	1015
10429	genetics	839
15957	neuroscience	955
22880	cell biology	388
26265	evolutionary biology	155
22940	cell biology	379
23895	developmental biology	252
11559	neuroscience	1174
16451	neuroscience	939
1304	microbiology	128
3533	bioinformatics	214
23674	developmental biology	249
871	microbiology	114
10363	genetics	828
22758	cell biology	537
23528	developmental biology	443
4739	bioinformatics	910
15453	neuroscience	927
16608	neuroscience	875
23530	developmental biology	272
1088	microbiology	105
24018	developmental biology	238
13194	neuroscience	1037
2991	bioinformatics	209
14873	neuroscience	341
6911	genomics	741
873	microbiology	140
31438	bioinformatics	153
5088	bioinformatics	354
2218	bioinformatics	1244
24015	developmental biology	242
8877	genetics	874
23683	developmental biology	267
10693	genetics	834
26776	molecular biology	105
609	microbiology	143
7143	genomics	1344
14446	neuroscience	362
16659	neuroscience	867
22900	cell biology	539
15714	neuroscience	878
21497	cancer biology	93
23586	developmental biology	340
21885	cancer biology	1617
9644	genetics	824
12528	neuroscience	672
22134	cell biology	526
15041	neuroscience	137
23688	developmental biology	271
16355	neuroscience	912
10573	genetics	803
1097	microbiology	104
25461	evolutionary biology	212
3138	bioinformatics	1039
10191	genetics	796
26864	molecular biology	168
9233	genetics	1038
23435	developmental biology	416
4522	bioinformatics	320
13336	neuroscience	926
9834	genetics	822
13266	neuroscience	922
24069	developmental biology	261
23543	developmental biology	264
15894	neuroscience	207
2957	bioinformatics	387
12372	neuroscience	391
23667	developmental biology	254
24055	developmental biology	235
10332	genetics	779
2691	bioinformatics	1471
14979	neuroscience	227
23437	developmental biology	303
9658	genetics	131
23540	developmental biology	272
31542	animal behavior and cognition	67
23681	developmental biology	264
32957	neuroscience	96
3470	bioinformatics	184
10112	genetics	780
32202	systems biology	65
23084	cell biology	355
10581	genetics	759
23272	developmental biology	739
26588	evolutionary biology	3526
10441	genetics	756
15642	neuroscience	895
9785	genetics	766
25566	evolutionary biology	1075
3460	bioinformatics	157
23171	cell biology	352
9379	genetics	849
869	microbiology	130
23966	developmental biology	239
28325	plant biology	466
1169	microbiology	131
9328	genetics	914
9846	genetics	751
23713	developmental biology	219
3678	bioinformatics	169
415	microbiology	360
10111	genetics	799
23108	cell biology	511
23545	developmental biology	234
10097	genetics	735
23855	developmental biology	214
625	microbiology	157
9653	genetics	127
1023	microbiology	121
5038	bioinformatics	276
16454	neuroscience	864
11529	biochemistry	974
10049	genetics	748
31547	bioengineering	289
14654	neuroscience	167
22450	cell biology	612
23601	developmental biology	223
30767	biophysics	707
14642	neuroscience	1036
995	microbiology	130
23579	developmental biology	237
16094	neuroscience	939
22584	cell biology	675
27024	molecular biology	86
13616	neuroscience	199
23712	developmental biology	252
31051	biophysics	844
15353	neuroscience	877
22080	cell biology	852
14986	neuroscience	172
13688	neuroscience	162
16301	neuroscience	302
1096	microbiology	126
15373	neuroscience	887
3568	bioinformatics	399
26738	molecular biology	157
26889	molecular biology	108
13902	neuroscience	163
23763	developmental biology	232
10351	genetics	751
3853	bioinformatics	954
26950	molecular biology	109
1552	microbiology	91
30648	biophysics	778
7052	genomics	364
9562	genetics	769
23949	developmental biology	201
14074	neuroscience	322
12885	neuroscience	206
2599	bioinformatics	149
14717	neuroscience	147
463	microbiology	534
16166	neuroscience	855
418	microbiology	120
4454	bioinformatics	151
23875	developmental biology	205
5243	bioinformatics	1080
14002	neuroscience	876
15797	neuroscience	877
9257	genetics	718
9918	genetics	735
23725	developmental biology	196
965	microbiology	148
4160	bioinformatics	110
9915	genetics	778
602	microbiology	161
23523	developmental biology	347
22642	cell biology	161
13577	neuroscience	887
823	microbiology	140
10706	genetics	685
1347	microbiology	115
23603	developmental biology	205
15689	neuroscience	894
9581	genetics	741
23383	developmental biology	208
32695	immunology	322
15360	neuroscience	875
6491	microbiology	1228
9582	genetics	788
1276	microbiology	91
12993	neuroscience	928
23718	developmental biology	204
1830	genomics	814
9616	genetics	699
15454	neuroscience	887
23399	developmental biology	324
23913	developmental biology	189
10564	genetics	713
23447	developmental biology	266
676	microbiology	145
2245	bioinformatics	337
23644	developmental biology	224
10258	genetics	663
10233	genetics	735
9786	genetics	664
23878	developmental biology	211
13063	neuroscience	896
1106	microbiology	156
26574	evolutionary biology	735
9979	genetics	656
9580	genetics	856
5678	bioinformatics	1501
22752	cell biology	398
12914	neuroscience	851
13509	neuroscience	125
[truncated: 35,649 more rows]
