# Supplementary material for: Tracking the popularity and outcomes of all bioRxiv preprints
Source: eLife journal article supplement (doi:10.7554/elife.45133), 2019-04-24
Supplement: supp [file elife-45133-supp-v1.zip › elife_poa_e45133_Figure_2_source_data_2.csv]

date	collection	month	cumulative
2013-11	biochemistry	53	53
2013-11	bioinformatics	300	300
2013-11	biophysics	47	47
2013-11	cancer biology	45	45
2013-11	cell biology	318	318
2013-11	developmental biology	214	214
2013-11	ecology	176	176
2013-11	evolutionary biology	501	501
2013-11	genetics	186	186
2013-11	genomics	685	685
2013-11	immunology	52	52
2013-11	microbiology	293	293
2013-11	molecular biology	50	50
2013-11	neuroscience	99	99
2013-11	plant biology	95	95
2013-11	synthetic biology	426	426
2013-11	systems biology	150	150
2013-11	zoology	26	26
2013-12	biochemistry	88	141
2013-12	bioengineering	125	125
2013-12	bioinformatics	1523	1823
2013-12	biophysics	268	315
2013-12	cancer biology	272	317
2013-12	cell biology	112	430
2013-12	developmental biology	328	542
2013-12	ecology	547	723
2013-12	evolutionary biology	1386	1887
2013-12	genetics	2779	2965
2013-12	genomics	2131	2816
2013-12	immunology	117	169
2013-12	microbiology	247	540
2013-12	molecular biology	116	166
2013-12	neuroscience	1490	1589
2013-12	plant biology	1236	1331
2013-12	synthetic biology	427	853
2013-12	systems biology	271	421
2013-12	zoology	89	115
2014-01	biochemistry	134	275
2014-01	bioengineering	271	396
2014-01	bioinformatics	2089	3912
2014-01	biophysics	484	799
2014-01	cancer biology	299	616
2014-01	cell biology	452	882
2014-01	developmental biology	309	851
2014-01	ecology	1117	1840
2014-01	evolutionary biology	1697	3584
2014-01	genetics	4273	7238
2014-01	genomics	2471	5287
2014-01	immunology	151	320
2014-01	microbiology	189	729
2014-01	molecular biology	86	252
2014-01	neuroscience	1082	2671
2014-01	plant biology	334	1665
2014-01	synthetic biology	262	1115
2014-01	systems biology	193	614
2014-01	zoology	496	611
2014-02	biochemistry	112	387
2014-02	bioengineering	36	432
2014-02	bioinformatics	3099	7011
2014-02	biophysics	345	1144
2014-02	cancer biology	249	865
2014-02	cell biology	448	1330
2014-02	developmental biology	334	1185
2014-02	ecology	692	2532
2014-02	evolutionary biology	1928	5512
2014-02	genetics	2726	9964
2014-02	genomics	2800	8087
2014-02	immunology	216	536
2014-02	microbiology	177	906
2014-02	molecular biology	57	309
2014-02	neuroscience	1015	3686
2014-02	plant biology	113	1778
2014-02	synthetic biology	178	1293
2014-02	systems biology	218	832
2014-02	zoology	109	720
2014-03	biochemistry	103	490
2014-03	bioengineering	154	586
2014-03	bioinformatics	3850	10861
2014-03	biophysics	444	1588
2014-03	cancer biology	163	1028
2014-03	cell biology	509	1839
2014-03	developmental biology	234	1419
2014-03	ecology	722	3254
2014-03	evolutionary biology	3412	8924
2014-03	genetics	1795	11759
2014-03	genomics	2846	10933
2014-03	immunology	198	734
2014-03	microbiology	312	1218
2014-03	molecular biology	101	410
2014-03	neuroscience	960	4646
2014-03	plant biology	267	2045
2014-03	scientific communication and education	28	28
2014-03	synthetic biology	769	2062
2014-03	systems biology	303	1135
2014-03	zoology	96	816
2014-04	biochemistry	261	751
2014-04	bioengineering	100	686
2014-04	bioinformatics	4430	15291
2014-04	biophysics	410	1998
2014-04	cancer biology	174	1202
2014-04	cell biology	584	2423
2014-04	developmental biology	372	1791
2014-04	ecology	1128	4382
2014-04	evolutionary biology	6554	15478
2014-04	genetics	3805	15564
2014-04	genomics	5697	16630
2014-04	immunology	272	1006
2014-04	microbiology	309	1527
2014-04	molecular biology	408	818
2014-04	neuroscience	1275	5921
2014-04	pathology	20	20
2014-04	physiology	179	179
2014-04	plant biology	324	2369
2014-04	scientific communication and education	65	93
2014-04	synthetic biology	543	2605
2014-04	systems biology	602	1737
2014-04	zoology	60	876
2014-05	biochemistry	346	1097
2014-05	bioengineering	114	800
2014-05	bioinformatics	7389	22680
2014-05	biophysics	470	2468
2014-05	cancer biology	212	1414
2014-05	cell biology	499	2922
2014-05	developmental biology	500	2291
2014-05	ecology	1062	5444
2014-05	evolutionary biology	4061	19539
2014-05	genetics	4364	19928
2014-05	genomics	4860	21490
2014-05	immunology	283	1289
2014-05	microbiology	347	1874
2014-05	molecular biology	383	1201
2014-05	neuroscience	2535	8456
2014-05	pathology	25	45
2014-05	pharmacology and toxicology	55	55
2014-05	physiology	90	269
2014-05	plant biology	288	2657
2014-05	scientific communication and education	93	186
2014-05	synthetic biology	667	3272
2014-05	systems biology	1196	2933
2014-05	zoology	53	929
2014-06	biochemistry	355	1452
2014-06	bioengineering	289	1089
2014-06	bioinformatics	8389	31069
2014-06	biophysics	457	2925
2014-06	cancer biology	381	1795
2014-06	cell biology	339	3261
2014-06	developmental biology	624	2915
2014-06	ecology	941	6385
2014-06	evolutionary biology	4144	23683
2014-06	genetics	3289	23217
2014-06	genomics	6639	28129
2014-06	immunology	232	1521
2014-06	microbiology	347	2221
2014-06	molecular biology	272	1473
2014-06	neuroscience	1812	10268
2014-06	paleontology	24	24
2014-06	pathology	22	67
2014-06	pharmacology and toxicology	171	226
2014-06	physiology	64	333
2014-06	plant biology	327	2984
2014-06	scientific communication and education	52	238
2014-06	synthetic biology	500	3772
2014-06	systems biology	863	3796
2014-06	zoology	67	996
2014-07	animal behavior and cognition	313	313
2014-07	biochemistry	226	1678
2014-07	bioengineering	186	1275
2014-07	bioinformatics	9838	40907
2014-07	biophysics	603	3528
2014-07	cancer biology	272	2067
2014-07	cell biology	520	3781
2014-07	developmental biology	446	3361
2014-07	ecology	1091	7476
2014-07	evolutionary biology	4606	28289
2014-07	genetics	3134	26351
2014-07	genomics	7351	35480
2014-07	immunology	349	1870
2014-07	microbiology	436	2657
2014-07	molecular biology	1053	2526
2014-07	neuroscience	1794	12062
2014-07	paleontology	23	47
2014-07	pathology	147	214
2014-07	pharmacology and toxicology	117	343
2014-07	physiology	107	440
2014-07	plant biology	308	3292
2014-07	scientific communication and education	191	429
2014-07	synthetic biology	697	4469
2014-07	systems biology	967	4763
2014-07	zoology	98	1094
2014-08	animal behavior and cognition	163	476
2014-08	biochemistry	146	1824
2014-08	bioengineering	296	1571
2014-08	bioinformatics	8116	49023
2014-08	biophysics	382	3910
2014-08	cancer biology	209	2276
2014-08	cell biology	446	4227
2014-08	developmental biology	739	4100
2014-08	ecology	1158	8634
2014-08	evolutionary biology	3829	32118
2014-08	genetics	3633	29984
2014-08	genomics	5122	40602
2014-08	immunology	225	2095
2014-08	microbiology	371	3028
2014-08	molecular biology	512	3038
2014-08	neuroscience	1254	13316
2014-08	paleontology	23	70
2014-08	pathology	34	248
2014-08	pharmacology and toxicology	68	411
2014-08	physiology	59	499
2014-08	plant biology	227	3519
2014-08	scientific communication and education	136	565
2014-08	synthetic biology	555	5024
2014-08	systems biology	735	5498
2014-08	zoology	61	1155
2014-09	animal behavior and cognition	134	610
2014-09	biochemistry	171	1995
2014-09	bioengineering	144	1715
2014-09	bioinformatics	10239	59262
2014-09	biophysics	524	4434
2014-09	cancer biology	399	2675
2014-09	cell biology	450	4677
2014-09	developmental biology	814	4914
2014-09	ecology	1237	9871
2014-09	evolutionary biology	5321	37439
2014-09	genetics	7423	37407
2014-09	genomics	7080	47682
2014-09	immunology	294	2389
2014-09	microbiology	518	3546
2014-09	molecular biology	872	3910
2014-09	neuroscience	1818	15134
2014-09	paleontology	27	97
2014-09	pathology	11	259
2014-09	pharmacology and toxicology	66	477
2014-09	physiology	124	623
2014-09	plant biology	229	3748
2014-09	scientific communication and education	195	760
2014-09	synthetic biology	873	5897
2014-09	systems biology	1078	6576
2014-09	zoology	194	1349
2014-10	animal behavior and cognition	258	868
2014-10	biochemistry	177	2172
2014-10	bioengineering	122	1837
2014-10	bioinformatics	10875	70137
2014-10	biophysics	663	5097
2014-10	cancer biology	442	3117
2014-10	cell biology	410	5087
2014-10	developmental biology	808	5722
2014-10	ecology	1816	11687
2014-10	evolutionary biology	6328	43767
2014-10	genetics	5682	43089
2014-10	genomics	8594	56276
2014-10	immunology	295	2684
2014-10	microbiology	588	4134
2014-10	molecular biology	980	4890
2014-10	neuroscience	2584	17718
2014-10	paleontology	42	139
2014-10	pathology	14	273
2014-10	pharmacology and toxicology	79	556
2014-10	physiology	70	693
2014-10	plant biology	724	4472
2014-10	scientific communication and education	140	900
2014-10	synthetic biology	918	6815
2014-10	systems biology	897	7473
2014-10	zoology	215	1564
2014-11	animal behavior and cognition	201	1069
2014-11	biochemistry	162	2334
2014-11	bioengineering	119	1956
2014-11	bioinformatics	10200	80337
2014-11	biophysics	627	5724
2014-11	cancer biology	645	3762
2014-11	cell biology	340	5427
2014-11	developmental biology	784	6506
2014-11	ecology	1453	13140
2014-11	evolutionary biology	7619	51386
2014-11	genetics	4517	47606
2014-11	genomics	6516	62792
2014-11	immunology	253	2937
2014-11	microbiology	506	4640
2014-11	molecular biology	1438	6328
2014-11	neuroscience	3844	21562
2014-11	paleontology	27	166
2014-11	pathology	13	286
2014-11	pharmacology and toxicology	101	657
2014-11	physiology	74	767
2014-11	plant biology	628	5100
2014-11	scientific communication and education	92	992
2014-11	synthetic biology	729	7544
2014-11	systems biology	1233	8706
2014-11	zoology	193	1757
2014-12	animal behavior and cognition	195	1264
2014-12	biochemistry	161	2495
2014-12	bioengineering	153	2109
2014-12	bioinformatics	9396	89733
2014-12	biophysics	558	6282
2014-12	cancer biology	652	4414
2014-12	cell biology	370	5797
2014-12	developmental biology	697	7203
2014-12	ecology	1436	14576
2014-12	evolutionary biology	8458	59844
2014-12	genetics	5049	52655
2014-12	genomics	6676	69468
2014-12	immunology	334	3271
2014-12	microbiology	572	5212
2014-12	molecular biology	703	7031
2014-12	neuroscience	3138	24700
2014-12	paleontology	39	205
2014-12	pathology	47	333
2014-12	pharmacology and toxicology	91	748
2014-12	physiology	110	877
2014-12	plant biology	727	5827
2014-12	scientific communication and education	101	1093
2014-12	synthetic biology	999	8543
2014-12	systems biology	1287	9993
2014-12	zoology	158	1915
2015-01	animal behavior and cognition	206	1470
2015-01	biochemistry	171	2666
2015-01	bioengineering	210	2319
2015-01	bioinformatics	12574	102307
2015-01	biophysics	600	6882
2015-01	cancer biology	883	5297
2015-01	cell biology	829	6626
2015-01	developmental biology	849	8052
2015-01	ecology	1700	16276
2015-01	evolutionary biology	8331	68175
2015-01	genetics	5097	57752
2015-01	genomics	10936	80404
2015-01	immunology	232	3503
2015-01	microbiology	539	5751
2015-01	molecular biology	748	7779
2015-01	neuroscience	4594	29294
2015-01	paleontology	18	223
2015-01	pathology	13	346
2015-01	pharmacology and toxicology	96	844
2015-01	physiology	105	982
2015-01	plant biology	762	6589
2015-01	scientific communication and education	82	1175
2015-01	synthetic biology	1299	9842
2015-01	systems biology	1543	11536
2015-01	zoology	103	2018
2015-02	animal behavior and cognition	256	1726
2015-02	biochemistry	349	3015
2015-02	bioengineering	929	3248
2015-02	bioinformatics	11525	113832
2015-02	biophysics	995	7877
2015-02	cancer biology	728	6025
2015-02	cell biology	481	7107
2015-02	developmental biology	886	8938
2015-02	ecology	2065	18341
2015-02	evolutionary biology	8443	76618
2015-02	genetics	21360	79112
2015-02	genomics	9012	89416
2015-02	immunology	455	3958
2015-02	microbiology	552	6303
2015-02	molecular biology	754	8533
2015-02	neuroscience	4281	33575
2015-02	paleontology	106	329
2015-02	pathology	11	357
2015-02	pharmacology and toxicology	88	932
2015-02	physiology	137	1119
2015-02	plant biology	1012	7601
2015-02	scientific communication and education	79	1254
2015-02	synthetic biology	1084	10926
2015-02	systems biology	1900	13436
2015-02	zoology	178	2196
2015-03	animal behavior and cognition	306	2032
2015-03	biochemistry	293	3308
2015-03	bioengineering	443	3691
2015-03	bioinformatics	14056	127888
2015-03	biophysics	1121	8998
2015-03	cancer biology	1254	7279
2015-03	cell biology	664	7771
2015-03	developmental biology	2063	11001
2015-03	ecology	2033	20374
2015-03	evolutionary biology	11434	88052
2015-03	genetics	12829	91941
2015-03	genomics	10667	100083
2015-03	immunology	383	4341
2015-03	microbiology	908	7211
2015-03	molecular biology	785	9318
2015-03	neuroscience	6647	40222
2015-03	paleontology	105	434
2015-03	pathology	10	367
2015-03	pharmacology and toxicology	89	1021
2015-03	physiology	175	1294
2015-03	plant biology	1246	8847
2015-03	scientific communication and education	147	1401
2015-03	synthetic biology	2851	13777
2015-03	systems biology	2027	15463
2015-03	zoology	157	2353
2015-04	animal behavior and cognition	383	2415
2015-04	biochemistry	302	3610
2015-04	bioengineering	330	4021
2015-04	bioinformatics	14116	142004
2015-04	biophysics	1247	10245
2015-04	cancer biology	892	8171
2015-04	cell biology	385	8156
2015-04	developmental biology	1217	12218
2015-04	ecology	2017	22391
2015-04	evolutionary biology	10471	98523
2015-04	genetics	17773	109714
2015-04	genomics	11100	111183
2015-04	immunology	412	4753
2015-04	microbiology	891	8102
2015-04	molecular biology	1158	10476
2015-04	neuroscience	5422	45644
2015-04	paleontology	79	513
2015-04	pathology	37	404
2015-04	pharmacology and toxicology	113	1134
2015-04	physiology	214	1508
2015-04	plant biology	1289	10136
2015-04	scientific communication and education	81	1482
2015-04	synthetic biology	1825	15602
2015-04	systems biology	1704	17167
2015-04	zoology	181	2534
2015-05	animal behavior and cognition	367	2782
2015-05	biochemistry	347	3957
2015-05	bioengineering	618	4639
2015-05	bioinformatics	15034	157038
2015-05	biophysics	1038	11283
2015-05	cancer biology	881	9052
2015-05	cell biology	463	8619
2015-05	developmental biology	1104	13322
2015-05	ecology	2343	24734
2015-05	evolutionary biology	12107	110630
2015-05	genetics	10408	120122
2015-05	genomics	17628	128811
2015-05	immunology	357	5110
2015-05	microbiology	1275	9377
2015-05	molecular biology	805	11281
2015-05	neuroscience	4211	49855
2015-05	paleontology	89	602
2015-05	pathology	62	466
2015-05	pharmacology and toxicology	106	1240
2015-05	physiology	162	1670
2015-05	plant biology	1514	11650
2015-05	scientific communication and education	164	1646
2015-05	synthetic biology	1989	17591
2015-05	systems biology	2181	19348
2015-05	zoology	210	2744
2015-06	animal behavior and cognition	374	3156
2015-06	biochemistry	214	4171
2015-06	bioengineering	376	5015
2015-06	bioinformatics	20009	177047
2015-06	biophysics	809	12092
2015-06	cancer biology	994	10046
2015-06	cell biology	680	9299
2015-06	developmental biology	1070	14392
2015-06	ecology	2059	26793
2015-06	evolutionary biology	10726	121356
2015-06	genetics	8914	129036
2015-06	genomics	16102	144913
2015-06	immunology	293	5403
2015-06	microbiology	1415	10792
2015-06	molecular biology	993	12274
2015-06	neuroscience	4903	54758
2015-06	paleontology	54	656
2015-06	pathology	87	553
2015-06	pharmacology and toxicology	657	1897
2015-06	physiology	172	1842
2015-06	plant biology	1222	12872
2015-06	scientific communication and education	158	1804
2015-06	synthetic biology	1716	19307
2015-06	systems biology	1607	20955
2015-06	zoology	146	2890
2015-07	animal behavior and cognition	617	3773
2015-07	biochemistry	319	4490
2015-07	bioengineering	892	5907
2015-07	bioinformatics	15456	192503
2015-07	biophysics	1234	13326
2015-07	cancer biology	1255	11301
2015-07	cell biology	518	9817
2015-07	developmental biology	1481	15873
2015-07	ecology	1823	28616
2015-07	evolutionary biology	12601	133957
2015-07	genetics	14472	143508
2015-07	genomics	14146	159059
2015-07	immunology	341	5744
2015-07	microbiology	1730	12522
2015-07	molecular biology	849	13123
2015-07	neuroscience	7036	61794
2015-07	paleontology	33	689
2015-07	pathology	61	614
2015-07	pharmacology and toxicology	205	2102
2015-07	physiology	144	1986
2015-07	plant biology	1299	14171
2015-07	scientific communication and education	6125	7929
2015-07	synthetic biology	1169	20476
2015-07	systems biology	1619	22574
2015-07	zoology	180	3070
2015-08	animal behavior and cognition	458	4231
2015-08	biochemistry	399	4889
2015-08	bioengineering	892	6799
2015-08	bioinformatics	15686	208189
2015-08	biophysics	1084	14410
2015-08	cancer biology	1276	12577
2015-08	cell biology	506	10323
2015-08	developmental biology	1007	16880
2015-08	ecology	2727	31343
2015-08	evolutionary biology	11117	145074
2015-08	genetics	10171	153679
2015-08	genomics	16610	175669
2015-08	immunology	332	6076
2015-08	microbiology	1448	13970
2015-08	molecular biology	1012	14135
2015-08	neuroscience	4675	66469
2015-08	paleontology	41	730
2015-08	pathology	26	640
2015-08	pharmacology and toxicology	142	2244
2015-08	physiology	98	2084
2015-08	plant biology	1430	15601
2015-08	scientific communication and education	1494	9423
2015-08	synthetic biology	1973	22449
2015-08	systems biology	1408	23982
2015-08	zoology	1594	4664
2015-09	animal behavior and cognition	692	4923
2015-09	biochemistry	540	5429
2015-09	bioengineering	1024	7823
2015-09	bioinformatics	18013	226202
2015-09	biophysics	1246	15656
2015-09	cancer biology	2096	14673
2015-09	cell biology	553	10876
2015-09	developmental biology	1137	18017
2015-09	ecology	3139	34482
2015-09	evolutionary biology	12910	157984
2015-09	genetics	9458	163137
2015-09	genomics	15851	191520
2015-09	immunology	489	6565
2015-09	microbiology	2235	16205
2015-09	molecular biology	1823	15958
2015-09	neuroscience	5209	71678
2015-09	paleontology	315	1045
2015-09	pathology	34	674
2015-09	pharmacology and toxicology	171	2415
2015-09	physiology	182	2266
2015-09	plant biology	1166	16767
2015-09	scientific communication and education	835	10258
2015-09	synthetic biology	1596	24045
2015-09	systems biology	2000	25982
2015-09	zoology	543	5207
2015-10	animal behavior and cognition	1035	5958
2015-10	biochemistry	631	6060
2015-10	bioengineering	886	8709
2015-10	bioinformatics	19664	245866
2015-10	biophysics	1499	17155
2015-10	cancer biology	2061	16734
2015-10	cell biology	1670	12546
2015-10	clinical trials	52	52
2015-10	developmental biology	1361	19378
2015-10	ecology	3183	37665
2015-10	evolutionary biology	14993	172977
2015-10	genetics	17721	180858
2015-10	genomics	20760	212280
2015-10	immunology	364	6929
2015-10	microbiology	1908	18113
2015-10	molecular biology	1183	17141
2015-10	neuroscience	7724	79402
2015-10	paleontology	141	1186
2015-10	pathology	69	743
2015-10	pharmacology and toxicology	154	2569
2015-10	physiology	272	2538
2015-10	plant biology	1173	17940
2015-10	scientific communication and education	2209	12467
2015-10	synthetic biology	1451	25496
2015-10	systems biology	2359	28341
2015-10	zoology	404	5611
2015-11	animal behavior and cognition	672	6630
2015-11	biochemistry	553	6613
2015-11	bioengineering	964	9673
2015-11	bioinformatics	20834	266700
2015-11	biophysics	1557	18712
2015-11	cancer biology	2006	18740
2015-11	cell biology	1839	14385
2015-11	clinical trials	41	93
2015-11	developmental biology	1601	20979
2015-11	ecology	3371	41036
2015-11	evolutionary biology	16642	189619
2015-11	genetics	15870	196728
2015-11	genomics	26915	239195
2015-11	immunology	635	7564
2015-11	microbiology	2849	20962
2015-11	molecular biology	1460	18601
2015-11	neuroscience	6590	85992
2015-11	paleontology	163	1349
2015-11	pathology	94	837
2015-11	pharmacology and toxicology	230	2799
2015-11	physiology	393	2931
2015-11	plant biology	2052	19992
2015-11	scientific communication and education	2101	14568
2015-11	synthetic biology	1621	27117
2015-11	systems biology	2495	30836
2015-11	zoology	353	5964
2015-12	animal behavior and cognition	935	7565
2015-12	biochemistry	807	7420
2015-12	bioengineering	802	10475
2015-12	bioinformatics	19265	285965
2015-12	biophysics	1285	19997
2015-12	cancer biology	1597	20337
2015-12	cell biology	836	15221
2015-12	clinical trials	736	829
2015-12	developmental biology	1143	22122
2015-12	ecology	3243	44279
2015-12	evolutionary biology	14516	204135
2015-12	genetics	11369	208097
2015-12	genomics	24510	263705
2015-12	immunology	489	8053
2015-12	microbiology	3700	24662
2015-12	molecular biology	1152	19753
2015-12	neuroscience	7886	93878
2015-12	paleontology	156	1505
2015-12	pathology	139	976
2015-12	pharmacology and toxicology	206	3005
2015-12	physiology	267	3198
2015-12	plant biology	2769	22761
2015-12	scientific communication and education	786	15354
2015-12	synthetic biology	1521	28638
2015-12	systems biology	2951	33787
2015-12	zoology	615	6579
2016-01	animal behavior and cognition	1307	8872
2016-01	biochemistry	829	8249
2016-01	bioengineering	1239	11714
2016-01	bioinformatics	26471	312436
2016-01	biophysics	1982	21979
2016-01	cancer biology	2992	23329
2016-01	cell biology	1274	16495
2016-01	clinical trials	156	985
2016-01	developmental biology	1979	24101
2016-01	ecology	3843	48122
2016-01	evolutionary biology	18555	222690
2016-01	genetics	14280	222377
2016-01	genomics	31049	294754
2016-01	immunology	841	8894
2016-01	microbiology	5266	29928
2016-01	molecular biology	1420	21173
2016-01	neuroscience	10880	104758
2016-01	paleontology	112	1617
2016-01	pathology	196	1172
2016-01	pharmacology and toxicology	193	3198
2016-01	physiology	352	3550
2016-01	plant biology	3153	25914
2016-01	scientific communication and education	1191	16545
2016-01	synthetic biology	1809	30447
2016-01	systems biology	13438	47225
2016-01	zoology	971	7550
2016-02	animal behavior and cognition	1363	10235
2016-02	biochemistry	1554	9803
2016-02	bioengineering	1207	12921
2016-02	bioinformatics	25866	338302
2016-02	biophysics	2447	24426
2016-02	cancer biology	2867	26196
2016-02	cell biology	2288	18783
2016-02	clinical trials	63	1048
2016-02	developmental biology	1676	25777
2016-02	ecology	8378	56500
2016-02	evolutionary biology	17449	240139
2016-02	genetics	16495	238872
2016-02	genomics	34861	329615
2016-02	immunology	849	9743
2016-02	microbiology	6411	36339
2016-02	molecular biology	1381	22554
2016-02	neuroscience	11228	115986
2016-02	paleontology	149	1766
2016-02	pathology	169	1341
2016-02	pharmacology and toxicology	372	3570
2016-02	physiology	278	3828
2016-02	plant biology	3239	29153
2016-02	scientific communication and education	1017	17562
2016-02	synthetic biology	1491	31938
2016-02	systems biology	6733	53958
2016-02	zoology	452	8002
2016-03	animal behavior and cognition	1719	11954
2016-03	biochemistry	1951	11754
2016-03	bioengineering	1647	14568
2016-03	bioinformatics	33138	371440
2016-03	biophysics	2995	27421
2016-03	cancer biology	3617	29813
2016-03	cell biology	4565	23348
2016-03	clinical trials	80	1128
2016-03	developmental biology	2436	28213
2016-03	ecology	11323	67823
2016-03	evolutionary biology	23415	263554
2016-03	genetics	19886	258758
2016-03	genomics	33638	363253
2016-03	immunology	1697	11440
2016-03	microbiology	7258	43597
2016-03	molecular biology	2612	25166
2016-03	neuroscience	17100	133086
2016-03	paleontology	675	2441
2016-03	pathology	289	1630
2016-03	pharmacology and toxicology	748	4318
2016-03	physiology	782	4610
2016-03	plant biology	3870	33023
2016-03	scientific communication and education	1777	19339
2016-03	synthetic biology	1944	33882
2016-03	systems biology	7831	61789
2016-03	zoology	519	8521
2016-04	animal behavior and cognition	1688	13642
2016-04	biochemistry	2171	13925
2016-04	bioengineering	1992	16560
2016-04	bioinformatics	37795	409235
2016-04	biophysics	3005	30426
2016-04	cancer biology	4294	34107
2016-04	cell biology	8095	31443
2016-04	clinical trials	17	1145
2016-04	developmental biology	2786	30999
2016-04	ecology	8427	76250
2016-04	epidemiology	228	228
2016-04	evolutionary biology	19944	283498
2016-04	genetics	20362	279120
2016-04	genomics	33647	396900
2016-04	immunology	4538	15978
2016-04	microbiology	11095	54692
2016-04	molecular biology	3225	28391
2016-04	neuroscience	17508	150594
2016-04	paleontology	256	2697
2016-04	pathology	662	2292
2016-04	pharmacology and toxicology	732	5050
2016-04	physiology	427	5037
2016-04	plant biology	3691	36714
2016-04	scientific communication and education	6396	25735
2016-04	synthetic biology	1798	35680
2016-04	systems biology	6433	68222
2016-04	zoology	768	9289
2016-05	animal behavior and cognition	2299	15941
2016-05	biochemistry	2474	16399
2016-05	bioengineering	1822	18382
2016-05	bioinformatics	42501	451736
2016-05	biophysics	3553	33979
2016-05	cancer biology	100546	134653
2016-05	cell biology	5482	36925
2016-05	clinical trials	52	1197
2016-05	developmental biology	5413	36412
2016-05	ecology	9414	85664
2016-05	epidemiology	1611	1839
2016-05	evolutionary biology	22255	305753
2016-05	genetics	24620	303740
2016-05	genomics	36279	433179
2016-05	immunology	3094	19072
2016-05	microbiology	10433	65125
2016-05	molecular biology	4997	33388
2016-05	neuroscience	56927	207521
2016-05	paleontology	216	2913
2016-05	pathology	617	2909
2016-05	pharmacology and toxicology	424	5474
2016-05	physiology	1190	6227
2016-05	plant biology	3110	39824
2016-05	scientific communication and education	2933	28668
2016-05	synthetic biology	3583	39263
2016-05	systems biology	7831	76053
2016-05	zoology	790	10079
2016-06	animal behavior and cognition	2528	18469
2016-06	biochemistry	2649	19048
2016-06	bioengineering	1763	20145
2016-06	bioinformatics	43392	495128
2016-06	biophysics	4430	38409
2016-06	cancer biology	28442	163095
2016-06	cell biology	5751	42676
2016-06	clinical trials	24	1221
2016-06	developmental biology	3564	39976
2016-06	ecology	8648	94312
2016-06	epidemiology	1521	3360
2016-06	evolutionary biology	21568	327321
2016-06	genetics	27561	331301
2016-06	genomics	38117	471296
2016-06	immunology	2422	21494
2016-06	microbiology	9125	74250
2016-06	molecular biology	5572	38960
2016-06	neuroscience	60002	267523
2016-06	paleontology	294	3207
2016-06	pathology	532	3441
2016-06	pharmacology and toxicology	448	5922
2016-06	physiology	1225	7452
2016-06	plant biology	4096	43920
2016-06	scientific communication and education	3327	31995
2016-06	synthetic biology	4824	44087
2016-06	systems biology	13594	89647
2016-06	zoology	641	10720
2016-07	animal behavior and cognition	2307	20776
2016-07	biochemistry	3162	22210
2016-07	bioengineering	2018	22163
2016-07	bioinformatics	43735	538863
2016-07	biophysics	5168	43577
2016-07	cancer biology	9503	172598
2016-07	cell biology	5310	47986
2016-07	clinical trials	36	1257
2016-07	developmental biology	3320	43296
2016-07	ecology	8977	103289
2016-07	epidemiology	2526	5886
2016-07	evolutionary biology	23313	350634
2016-07	genetics	37272	368573
2016-07	genomics	46806	518102
2016-07	immunology	2449	23943
2016-07	microbiology	8829	83079
2016-07	molecular biology	4508	43468
2016-07	neuroscience	35969	303492
2016-07	paleontology	281	3488
2016-07	pathology	664	4105
2016-07	pharmacology and toxicology	718	6640
2016-07	physiology	847	8299
2016-07	plant biology	4105	48025
2016-07	scientific communication and education	11371	43366
2016-07	synthetic biology	3635	47722
2016-07	systems biology	11577	101224
2016-07	zoology	657	11377
2016-08	animal behavior and cognition	4611	25387
2016-08	biochemistry	3515	25725
2016-08	bioengineering	5109	27272
2016-08	bioinformatics	46046	584909
2016-08	biophysics	6025	49602
2016-08	cancer biology	8557	181155
2016-08	cell biology	5651	53637
2016-08	clinical trials	34	1291
2016-08	developmental biology	4122	47418
2016-08	ecology	10618	113907
2016-08	epidemiology	3341	9227
2016-08	evolutionary biology	27897	378531
2016-08	genetics	26532	395105
2016-08	genomics	49694	567796
2016-08	immunology	2356	26299
2016-08	microbiology	10822	93901
2016-08	molecular biology	5935	49403
2016-08	neuroscience	36213	339705
2016-08	paleontology	222	3710
2016-08	pathology	534	4639
2016-08	pharmacology and toxicology	849	7489
2016-08	physiology	840	9139
2016-08	plant biology	4713	52738
2016-08	scientific communication and education	3792	47158
2016-08	synthetic biology	4754	52476
2016-08	systems biology	9827	111051
2016-08	zoology	724	12101
2016-09	animal behavior and cognition	2624	28011
2016-09	biochemistry	2948	28673
2016-09	bioengineering	8744	36016
2016-09	bioinformatics	47168	632077
2016-09	biophysics	6972	56574
2016-09	cancer biology	8128	189283
2016-09	cell biology	5057	58694
2016-09	clinical trials	28	1319
2016-09	developmental biology	3103	50521
2016-09	ecology	9773	123680
2016-09	epidemiology	4700	13927
2016-09	evolutionary biology	26473	405004
2016-09	genetics	27062	422167
2016-09	genomics	46510	614306
2016-09	immunology	2086	28385
2016-09	microbiology	11277	105178
2016-09	molecular biology	5581	54984
2016-09	neuroscience	34027	373732
2016-09	paleontology	686	4396
2016-09	pathology	515	5154
2016-09	pharmacology and toxicology	901	8390
2016-09	physiology	2179	11318
2016-09	plant biology	4676	57414
2016-09	scientific communication and education	3154	50312
2016-09	synthetic biology	4647	57123
2016-09	systems biology	9737	120788
2016-09	zoology	720	12821
2016-10	animal behavior and cognition	2651	30662
2016-10	biochemistry	3308	31981
2016-10	bioengineering	2652	38668
2016-10	bioinformatics	53040	685117
2016-10	biophysics	6910	63484
2016-10	cancer biology	8850	198133
2016-10	cell biology	6241	64935
2016-10	clinical trials	15	1334
2016-10	developmental biology	3135	53656
2016-10	ecology	10703	134383
2016-10	epidemiology	4043	17970
2016-10	evolutionary biology	24859	429863
2016-10	genetics	26841	449008
2016-10	genomics	49057	663363
2016-10	immunology	2068	30453
2016-10	microbiology	12003	117181
2016-10	molecular biology	6367	61351
2016-10	neuroscience	40674	414406
2016-10	paleontology	230	4626
2016-10	pathology	513	5667
2016-10	pharmacology and toxicology	966	9356
2016-10	physiology	1649	12967
2016-10	plant biology	5139	62553
2016-10	scientific communication and education	2852	53164
2016-10	synthetic biology	4844	61967
2016-10	systems biology	11468	132256
2016-10	zoology	809	13630
2016-11	animal behavior and cognition	3186	33848
2016-11	biochemistry	3781	35762
2016-11	bioengineering	2273	40941
2016-11	bioinformatics	59613	744730
2016-11	biophysics	9402	72886
2016-11	cancer biology	18204	216337
2016-11	cell biology	5770	70705
2016-11	clinical trials	136	1470
2016-11	developmental biology	2863	56519
2016-11	ecology	11743	146126
2016-11	epidemiology	3917	21887
2016-11	evolutionary biology	28345	458208
2016-11	genetics	25241	474249
2016-11	genomics	46553	709916
2016-11	immunology	2126	32579
2016-11	microbiology	14095	131276
2016-11	molecular biology	5176	66527
2016-11	neuroscience	45879	460285
2016-11	paleontology	216	4842
2016-11	pathology	428	6095
2016-11	pharmacology and toxicology	866	10222
2016-11	physiology	1882	14849
2016-11	plant biology	5740	68293
2016-11	scientific communication and education	13312	66476
2016-11	synthetic biology	4905	66872
2016-11	systems biology	9285	141541
2016-11	zoology	1089	14719
2016-12	animal behavior and cognition	3357	37205
2016-12	biochemistry	4124	39886
2016-12	bioengineering	2130	43071
2016-12	bioinformatics	48011	792741
2016-12	biophysics	7550	80436
2016-12	cancer biology	9107	225444
2016-12	cell biology	6199	76904
2016-12	clinical trials	61	1531
2016-12	developmental biology	3569	60088
2016-12	ecology	8286	154412
2016-12	epidemiology	2933	24820
2016-12	evolutionary biology	23940	482148
2016-12	genetics	23921	498170
2016-12	genomics	46886	756802
2016-12	immunology	1951	34530
2016-12	microbiology	13773	145049
2016-12	molecular biology	8128	74655
2016-12	neuroscience	41225	501510
2016-12	paleontology	149	4991
2016-12	pathology	402	6497
2016-12	pharmacology and toxicology	948	11170
2016-12	physiology	870	15719
2016-12	plant biology	4866	73159
2016-12	scientific communication and education	24571	91047
2016-12	synthetic biology	4772	71644
2016-12	systems biology	9304	150845
2016-12	zoology	984	15703
2017-01	animal behavior and cognition	2736	39941
2017-01	biochemistry	6472	46358
2017-01	bioengineering	3714	46785
2017-01	bioinformatics	54344	847085
2017-01	biophysics	9110	89546
2017-01	cancer biology	9544	234988
2017-01	cell biology	6694	83598
2017-01	clinical trials	115	1646
2017-01	developmental biology	4970	65058
2017-01	ecology	9025	163437
2017-01	epidemiology	3890	28710
2017-01	evolutionary biology	22275	504423
2017-01	genetics	24370	522540
2017-01	genomics	53120	809922
2017-01	immunology	2107	36637
2017-01	microbiology	15537	160586
2017-01	molecular biology	6996	81651
2017-01	neuroscience	50467	551977
2017-01	paleontology	170	5161
2017-01	pathology	485	6982
2017-01	pharmacology and toxicology	1978	13148
2017-01	physiology	808	16527
2017-01	plant biology	5422	78581
2017-01	scientific communication and education	9760	100807
2017-01	synthetic biology	4069	75713
2017-01	systems biology	10268	161113
2017-01	zoology	1061	16764
2017-02	animal behavior and cognition	3208	43149
2017-02	biochemistry	5139	51497
2017-02	bioengineering	3894	50679
2017-02	bioinformatics	54828	901913
2017-02	biophysics	8712	98258
2017-02	cancer biology	8230	243218
2017-02	cell biology	7391	90989
2017-02	clinical trials	288	1934
2017-02	developmental biology	6609	71667
2017-02	ecology	10160	173597
2017-02	epidemiology	4033	32743
2017-02	evolutionary biology	22847	527270
2017-02	genetics	26017	548557
2017-02	genomics	62786	872708
2017-02	immunology	2087	38724
2017-02	microbiology	18099	178685
2017-02	molecular biology	7114	88765
2017-02	neuroscience	51297	603274
2017-02	paleontology	318	5479
2017-02	pathology	588	7570
2017-02	pharmacology and toxicology	2360	15508
2017-02	physiology	737	17264
2017-02	plant biology	6634	85215
2017-02	scientific communication and education	9719	110526
2017-02	synthetic biology	4168	79881
2017-02	systems biology	8624	169737
2017-02	zoology	732	17496
2017-03	animal behavior and cognition	4241	47390
2017-03	biochemistry	6480	57977
2017-03	bioengineering	6318	56997
2017-03	bioinformatics	73106	975019
2017-03	biophysics	10829	109087
2017-03	cancer biology	10177	253395
2017-03	cell biology	9531	100520
2017-03	clinical trials	193	2127
2017-03	developmental biology	6624	78291
2017-03	ecology	12691	186288
2017-03	epidemiology	5505	38248
2017-03	evolutionary biology	34912	562182
2017-03	genetics	38829	587386
2017-03	genomics	71067	943775
2017-03	immunology	3405	42129
2017-03	microbiology	20761	199446
2017-03	molecular biology	7659	96424
2017-03	neuroscience	63309	666583
2017-03	paleontology	485	5964
2017-03	pathology	708	8278
2017-03	pharmacology and toxicology	2240	17748
2017-03	physiology	945	18209
2017-03	plant biology	10634	95849
2017-03	scientific communication and education	8920	119446
2017-03	synthetic biology	9093	88974
2017-03	systems biology	11605	181342
2017-03	zoology	1343	18839
2017-04	animal behavior and cognition	4456	51846
2017-04	biochemistry	8299	66276
2017-04	bioengineering	5281	62278
2017-04	bioinformatics	74494	1049513
2017-04	biophysics	11538	120625
2017-04	cancer biology	11193	264588
2017-04	cell biology	15267	115787
2017-04	clinical trials	964	3091
2017-04	developmental biology	9627	87918
2017-04	ecology	12568	198856
2017-04	epidemiology	6600	44848
2017-04	evolutionary biology	35242	597424
2017-04	genetics	31319	618705
2017-04	genomics	81343	1025118
2017-04	immunology	3632	45761
2017-04	microbiology	21848	221294
2017-04	molecular biology	20497	116921
2017-04	neuroscience	74248	740831
2017-04	paleontology	299	6263
2017-04	pathology	921	9199
2017-04	pharmacology and toxicology	2633	20381
2017-04	physiology	2063	20272
2017-04	plant biology	11070	106919
2017-04	scientific communication and education	10698	130144
2017-04	synthetic biology	6256	95230
2017-04	systems biology	13057	194399
2017-04	zoology	1301	20140
2017-05	animal behavior and cognition	5076	56922
2017-05	biochemistry	7995	74271
2017-05	bioengineering	6246	68524
2017-05	bioinformatics	78596	1128109
2017-05	biophysics	16081	136706
2017-05	cancer biology	11037	275625
2017-05	cell biology	24106	139893
2017-05	clinical trials	880	3971
2017-05	developmental biology	10149	98067
2017-05	ecology	14057	212913
2017-05	epidemiology	6543	51391
2017-05	evolutionary biology	33257	630681
2017-05	genetics	37446	656151
2017-05	genomics	90423	1115541
2017-05	immunology	4476	50237
2017-05	microbiology	22519	243813
2017-05	molecular biology	12554	129475
2017-05	neuroscience	77798	818629
2017-05	paleontology	316	6579
2017-05	pathology	1125	10324
2017-05	pharmacology and toxicology	2712	23093
2017-05	physiology	1401	21673
2017-05	plant biology	10754	117673
2017-05	scientific communication and education	12626	142770
2017-05	synthetic biology	6518	101748
2017-05	systems biology	14908	209307
2017-05	zoology	1448	21588
2017-06	animal behavior and cognition	4567	61489
2017-06	biochemistry	10751	85022
2017-06	bioengineering	6142	74666
2017-06	bioinformatics	91788	1219897
2017-06	biophysics	14643	151349
2017-06	cancer biology	12517	288142
2017-06	cell biology	18211	158104
2017-06	clinical trials	506	4477
2017-06	developmental biology	8789	106856
2017-06	ecology	13644	226557
2017-06	epidemiology	6004	57395
2017-06	evolutionary biology	39941	670622
2017-06	genetics	37202	693353
2017-06	genomics	72280	1187821
2017-06	immunology	4270	54507
2017-06	microbiology	22916	266729
2017-06	molecular biology	13395	142870
2017-06	neuroscience	78250	896879
2017-06	paleontology	420	6999
2017-06	pathology	1174	11498
2017-06	pharmacology and toxicology	3278	26371
2017-06	physiology	1604	23277
2017-06	plant biology	12598	130271
2017-06	scientific communication and education	14487	157257
2017-06	synthetic biology	6403	108151
2017-06	systems biology	13786	223093
2017-06	zoology	955	22543
2017-07	animal behavior and cognition	4956	66445
2017-07	biochemistry	13668	98690
2017-07	bioengineering	7124	81790
2017-07	bioinformatics	78903	1298800
2017-07	biophysics	13432	164781
2017-07	cancer biology	15766	303908
2017-07	cell biology	17408	175512
2017-07	clinical trials	483	4960
2017-07	developmental biology	8540	115396
2017-07	ecology	11736	238293
2017-07	epidemiology	6202	63597
2017-07	evolutionary biology	31419	702041
2017-07	genetics	36744	730097
2017-07	genomics	78877	1266698
2017-07	immunology	5387	59894
2017-07	microbiology	20293	287022
2017-07	molecular biology	13714	156584
2017-07	neuroscience	75373	972252
2017-07	paleontology	282	7281
2017-07	pathology	1098	12596
2017-07	pharmacology and toxicology	2005	28376
2017-07	physiology	1752	25029
2017-07	plant biology	14658	144929
2017-07	scientific communication and education	8254	165511
2017-07	synthetic biology	6514	114665
2017-07	systems biology	12708	235801
2017-07	zoology	737	23280
2017-08	animal behavior and cognition	5806	72251
2017-08	biochemistry	11738	110428
2017-08	bioengineering	8002	89792
2017-08	bioinformatics	85730	1384530
2017-08	biophysics	15387	180168
2017-08	cancer biology	14839	318747
2017-08	cell biology	22408	197920
2017-08	clinical trials	1408	6368
2017-08	developmental biology	11157	126553
2017-08	ecology	13996	252289
2017-08	epidemiology	8202	71799
2017-08	evolutionary biology	33517	735558
2017-08	genetics	41833	771930
2017-08	genomics	78815	1345513
2017-08	immunology	6928	66822
2017-08	microbiology	26348	313370
2017-08	molecular biology	13646	170230
2017-08	neuroscience	83757	1056009
2017-08	paleontology	397	7678
2017-08	pathology	1055	13651
2017-08	pharmacology and toxicology	2159	30535
2017-08	physiology	2331	27360
2017-08	plant biology	14997	159926
2017-08	scientific communication and education	10295	175806
2017-08	synthetic biology	6827	121492
2017-08	systems biology	14228	250029
2017-08	zoology	1055	24335
2017-09	animal behavior and cognition	5786	78037
2017-09	biochemistry	11416	121844
2017-09	bioengineering	6829	96621
2017-09	bioinformatics	87427	1471957
2017-09	biophysics	14889	195057
2017-09	cancer biology	17284	336031
2017-09	cell biology	23035	220955
2017-09	clinical trials	481	6849
2017-09	developmental biology	11076	137629
2017-09	ecology	13931	266220
2017-09	epidemiology	8251	80050
2017-09	evolutionary biology	36658	772216
2017-09	genetics	42196	814126
2017-09	genomics	88687	1434200
2017-09	immunology	4999	71821
2017-09	microbiology	23428	336798
2017-09	molecular biology	14160	184390
2017-09	neuroscience	86612	1142621
2017-09	paleontology	367	8045
2017-09	pathology	1096	14747
2017-09	pharmacology and toxicology	2441	32976
2017-09	physiology	2131	29491
2017-09	plant biology	12210	172136
2017-09	scientific communication and education	6911	182717
2017-09	synthetic biology	6279	127771
2017-09	systems biology	13730	263759
2017-09	zoology	1269	25604
2017-10	animal behavior and cognition	7156	85193
2017-10	biochemistry	13652	135496
2017-10	bioengineering	9491	106112
2017-10	bioinformatics	91454	1563411
2017-10	biophysics	18025	213082
2017-10	cancer biology	21426	357457
2017-10	cell biology	22986	243941
2017-10	clinical trials	868	7717
2017-10	developmental biology	13000	150629
2017-10	ecology	14827	281047
2017-10	epidemiology	10640	90690
2017-10	evolutionary biology	40594	812810
2017-10	genetics	48433	862559
2017-10	genomics	95810	1530010
2017-10	immunology	5789	77610
2017-10	microbiology	26580	363378
2017-10	molecular biology	14334	198724
2017-10	neuroscience	118453	1261074
2017-10	paleontology	419	8464
2017-10	pathology	1315	16062
2017-10	pharmacology and toxicology	2620	35596
2017-10	physiology	2415	31906
2017-10	plant biology	13417	185553
2017-10	scientific communication and education	7411	190128
2017-10	synthetic biology	7185	134956
2017-10	systems biology	16232	279991
2017-10	zoology	2076	27680
2017-11	animal behavior and cognition	9148	94341
2017-11	biochemistry	13823	149319
2017-11	bioengineering	9897	116009
2017-11	bioinformatics	97236	1660647
2017-11	biophysics	16915	229997
2017-11	cancer biology	18763	376220
2017-11	cell biology	23901	267842
2017-11	clinical trials	1882	9599
2017-11	developmental biology	13684	164313
2017-11	ecology	16817	297864
2017-11	epidemiology	9615	100305
2017-11	evolutionary biology	42834	855644
2017-11	genetics	47317	909876
2017-11	genomics	89457	1619467
2017-11	immunology	8269	85879
2017-11	microbiology	28856	392234
2017-11	molecular biology	16410	215134
2017-11	neuroscience	107791	1368865
2017-11	paleontology	2203	10667
2017-11	pathology	1243	17305
2017-11	pharmacology and toxicology	2337	37933
2017-11	physiology	2466	34372
2017-11	plant biology	13576	199129
2017-11	scientific communication and education	5840	195968
2017-11	synthetic biology	8363	143319
2017-11	systems biology	16244	296235
2017-11	zoology	1562	29242
2017-12	animal behavior and cognition	7973	102314
2017-12	biochemistry	9987	159306
2017-12	bioengineering	7423	123432
2017-12	bioinformatics	83581	1744228
2017-12	biophysics	15841	245838
2017-12	cancer biology	21499	397719
2017-12	cell biology	21037	288879
2017-12	clinical trials	837	10436
2017-12	developmental biology	11292	175605
2017-12	ecology	13087	310951
2017-12	epidemiology	7983	108288
2017-12	evolutionary biology	35388	891032
2017-12	genetics	38261	948137
2017-12	genomics	82796	1702263
2017-12	immunology	6678	92557
2017-12	microbiology	24247	416481
2017-12	molecular biology	11094	226228
2017-12	neuroscience	93626	1462491
2017-12	paleontology	624	11291
2017-12	pathology	1220	18525
2017-12	pharmacology and toxicology	1875	39808
2017-12	physiology	1743	36115
2017-12	plant biology	11525	210654
2017-12	scientific communication and education	7297	203265
2017-12	synthetic biology	6530	149849
2017-12	systems biology	15659	311894
2017-12	zoology	1672	30914
2018-01	animal behavior and cognition	8265	110579
2018-01	biochemistry	14878	174184
2018-01	bioengineering	9463	132895
2018-01	bioinformatics	99187	1843415
2018-01	biophysics	19780	265618
2018-01	cancer biology	21978	419697
2018-01	cell biology	36215	325094
2018-01	clinical trials	1028	11464
2018-01	developmental biology	15065	190670
2018-01	ecology	15852	326803
2018-01	epidemiology	9394	117682
2018-01	evolutionary biology	43392	934424
2018-01	genetics	52626	1000763
2018-01	genomics	80886	1783149
2018-01	immunology	26370	118927
2018-01	microbiology	31399	447880
2018-01	molecular biology	14893	241121
2018-01	neuroscience	166549	1629040
2018-01	paleontology	914	12205
2018-01	pathology	1366	19891
2018-01	pharmacology and toxicology	2076	41884
2018-01	physiology	2730	38845
2018-01	plant biology	17877	228531
2018-01	scientific communication and education	8641	211906
2018-01	synthetic biology	8056	157905
2018-01	systems biology	18449	330343
2018-01	zoology	2085	32999
2018-02	animal behavior and cognition	9028	119607
2018-02	biochemistry	14936	189120
2018-02	bioengineering	12153	145048
2018-02	bioinformatics	111737	1955152
2018-02	biophysics	20462	286080
2018-02	cancer biology	20750	440447
2018-02	cell biology	26866	351960
2018-02	clinical trials	1439	12903
2018-02	developmental biology	15794	206464
2018-02	ecology	18471	345274
2018-02	epidemiology	11657	129339
2018-02	evolutionary biology	45187	979611
2018-02	genetics	53484	1054247
2018-02	genomics	84143	1867292
2018-02	immunology	9825	128752
2018-02	microbiology	32093	479973
2018-02	molecular biology	16592	257713
2018-02	neuroscience	128413	1757453
2018-02	paleontology	625	12830
2018-02	pathology	2194	22085
2018-02	pharmacology and toxicology	2622	44506
2018-02	physiology	3001	41846
2018-02	plant biology	15139	243670
2018-02	scientific communication and education	7529	219435
2018-02	synthetic biology	7261	165166
2018-02	systems biology	20626	350969
2018-02	zoology	1971	34970
2018-03	animal behavior and cognition	8328	127935
2018-03	biochemistry	15295	204415
2018-03	bioengineering	14016	159064
2018-03	bioinformatics	115849	2071001
2018-03	biophysics	27430	313510
2018-03	cancer biology	23173	463620
2018-03	cell biology	30803	382763
2018-03	clinical trials	1428	14331
2018-03	developmental biology	16288	222752
2018-03	ecology	19010	364284
2018-03	epidemiology	13471	142810
2018-03	evolutionary biology	48144	1027755
2018-03	genetics	54712	1108959
2018-03	genomics	125606	1992898
2018-03	immunology	11185	139937
2018-03	microbiology	36186	516159
2018-03	molecular biology	20833	278546
2018-03	neuroscience	136402	1893855
2018-03	paleontology	606	13436
2018-03	pathology	2137	24222
2018-03	pharmacology and toxicology	2806	47312
2018-03	physiology	3020	44866
2018-03	plant biology	15763	259433
2018-03	scientific communication and education	9299	228734
2018-03	synthetic biology	8872	174038
2018-03	systems biology	24014	374983
2018-03	zoology	3036	38006
2018-04	animal behavior and cognition	7763	135698
2018-04	biochemistry	14493	218908
2018-04	bioengineering	11844	170908
2018-04	bioinformatics	118016	2189017
2018-04	biophysics	30934	344444
2018-04	cancer biology	23190	486810
2018-04	cell biology	31857	414620
2018-04	clinical trials	1224	15555
2018-04	developmental biology	16041	238793
2018-04	ecology	20151	384435
2018-04	epidemiology	13179	155989
2018-04	evolutionary biology	40622	1068377
2018-04	genetics	54884	1163843
2018-04	genomics	115631	2108529
2018-04	immunology	12568	152505
2018-04	microbiology	34782	550941
2018-04	molecular biology	17926	296472
2018-04	neuroscience	142823	2036678
2018-04	paleontology	571	14007
2018-04	pathology	2206	26428
2018-04	pharmacology and toxicology	2671	49983
2018-04	physiology	3034	47900
2018-04	plant biology	14426	273859
2018-04	scientific communication and education	6178	234912
2018-04	synthetic biology	9256	183294
2018-04	systems biology	23788	398771
2018-04	zoology	3041	41047
2018-05	animal behavior and cognition	10611	146309
2018-05	biochemistry	19137	238045
2018-05	bioengineering	13561	184469
2018-05	bioinformatics	120495	2309512
2018-05	biophysics	26264	370708
2018-05	cancer biology	26757	513567
2018-05	cell biology	34387	449007
2018-05	clinical trials	1657	17212
2018-05	developmental biology	18343	257136
2018-05	ecology	21025	405460
2018-05	epidemiology	12294	168283
2018-05	evolutionary biology	44543	1112920
2018-05	genetics	54994	1218837
2018-05	genomics	107378	2215907
2018-05	immunology	14410	166915
2018-05	microbiology	42843	593784
2018-05	molecular biology	23188	319660
2018-05	neuroscience	140740	2177418
2018-05	paleontology	745	14752
2018-05	pathology	2278	28706
2018-05	pharmacology and toxicology	2788	52771
2018-05	physiology	3637	51537
2018-05	plant biology	16418	290277
2018-05	scientific communication and education	7194	242106
2018-05	synthetic biology	11032	194326
2018-05	systems biology	22431	421202
2018-05	zoology	3426	44473
2018-06	animal behavior and cognition	10529	156838
2018-06	biochemistry	16267	254312
2018-06	bioengineering	13321	197790
2018-06	bioinformatics	113649	2423161
2018-06	biophysics	28504	399212
2018-06	cancer biology	22354	535921
2018-06	cell biology	31560	480567
2018-06	clinical trials	1375	18587
2018-06	developmental biology	19922	277058
2018-06	ecology	22334	427794
2018-06	epidemiology	11398	179681
2018-06	evolutionary biology	44910	1157830
2018-06	genetics	50053	1268890
2018-06	genomics	91745	2307652
2018-06	immunology	13924	180839
2018-06	microbiology	42686	636470
2018-06	molecular biology	24312	343972
2018-06	neuroscience	131808	2309226
2018-06	paleontology	977	15729
2018-06	pathology	2821	31527
2018-06	pharmacology and toxicology	2520	55291
2018-06	physiology	3453	54990
2018-06	plant biology	14563	304840
2018-06	scientific communication and education	6600	248706
2018-06	synthetic biology	12648	206974
2018-06	systems biology	26228	447430
2018-06	zoology	2040	46513
2018-07	animal behavior and cognition	11300	168138
2018-07	biochemistry	14372	268684
2018-07	bioengineering	11570	209360
2018-07	bioinformatics	117272	2540433
2018-07	biophysics	28857	428069
2018-07	cancer biology	29013	564934
2018-07	cell biology	32708	513275
2018-07	clinical trials	1236	19823
2018-07	developmental biology	20825	297883
2018-07	ecology	21550	449344
2018-07	epidemiology	14178	193859
2018-07	evolutionary biology	41131	1198961
2018-07	genetics	52024	1320914
2018-07	genomics	90649	2398301
2018-07	immunology	12910	193749
2018-07	microbiology	42415	678885
2018-07	molecular biology	23379	367351
2018-07	neuroscience	140390	2449616
2018-07	paleontology	1081	16810
2018-07	pathology	3191	34718
2018-07	pharmacology and toxicology	2689	57980
2018-07	physiology	3463	58453
2018-07	plant biology	16822	321662
2018-07	scientific communication and education	12521	261227
2018-07	synthetic biology	9652	216626
2018-07	systems biology	22920	470350
2018-07	zoology	1787	48300
2018-08	animal behavior and cognition	10737	178875
2018-08	biochemistry	19366	288050
2018-08	bioengineering	12551	221911
2018-08	bioinformatics	116237	2656670
2018-08	biophysics	28934	457003
2018-08	cancer biology	26908	591842
2018-08	cell biology	33494	546769
2018-08	clinical trials	1334	21157
2018-08	developmental biology	22985	320868
2018-08	ecology	21927	471271
2018-08	epidemiology	12313	206172
2018-08	evolutionary biology	40272	1239233
2018-08	genetics	52194	1373108
2018-08	genomics	93741	2492042
2018-08	immunology	15726	209475
2018-08	microbiology	50169	729054
2018-08	molecular biology	23903	391254
2018-08	neuroscience	145523	2595139
2018-08	paleontology	867	17677
2018-08	pathology	4058	38776
2018-08	pharmacology and toxicology	2985	60965
2018-08	physiology	6728	65181
2018-08	plant biology	17372	339034
2018-08	scientific communication and education	7292	268519
2018-08	synthetic biology	9497	226123
2018-08	systems biology	22407	492757
2018-08	zoology	2065	50365
2018-09	animal behavior and cognition	13304	192179
2018-09	biochemistry	20292	308342
2018-09	bioengineering	14529	236440
2018-09	bioinformatics	118002	2774672
2018-09	biophysics	35459	492462
2018-09	cancer biology	30014	621856
2018-09	cell biology	41561	588330
2018-09	clinical trials	1239	22396
2018-09	developmental biology	24101	344969
2018-09	ecology	24738	496009
2018-09	epidemiology	14357	220529
2018-09	evolutionary biology	49688	1288921
2018-09	genetics	61637	1434745
2018-09	genomics	104990	2597032
2018-09	immunology	15745	225220
2018-09	microbiology	52610	781664
2018-09	molecular biology	26680	417934
2018-09	neuroscience	173344	2768483
2018-09	paleontology	2193	19870
2018-09	pathology	3432	42208
2018-09	pharmacology and toxicology	3969	64934
2018-09	physiology	5097	70278
2018-09	plant biology	18161	357195
2018-09	scientific communication and education	8929	277448
2018-09	synthetic biology	11498	237621
2018-09	systems biology	22923	515680
2018-09	zoology	2681	53046
2018-10	animal behavior and cognition	17163	209342
2018-10	biochemistry	29052	337394
2018-10	bioengineering	20817	257257
2018-10	bioinformatics	153560	2928232
2018-10	biophysics	43584	536046
2018-10	cancer biology	38147	660003
2018-10	cell biology	51230	639560
2018-10	clinical trials	2554	24950
2018-10	developmental biology	30894	375863
2018-10	ecology	34035	530044
2018-10	epidemiology	18203	238732
2018-10	evolutionary biology	61852	1350773
2018-10	genetics	73950	1508695
2018-10	genomics	126905	2723937
2018-10	immunology	20823	246043
2018-10	microbiology	70177	851841
2018-10	molecular biology	33444	451378
2018-10	neuroscience	213505	2981988
2018-10	paleontology	1384	21254
2018-10	pathology	3842	46050
2018-10	pharmacology and toxicology	5537	70471
2018-10	physiology	6251	76529
2018-10	plant biology	24440	381635
2018-10	scientific communication and education	10474	287922
2018-10	synthetic biology	14295	251916
2018-10	systems biology	30694	546374
2018-10	zoology	3484	56530
2018-11	animal behavior and cognition	15748	225090
2018-11	biochemistry	27528	364922
2018-11	bioengineering	22811	280068
2018-11	bioinformatics	152268	3080500
2018-11	biophysics	44077	580123
2018-11	cancer biology	35739	695742
2018-11	cell biology	49008	688568
2018-11	clinical trials	2939	27889
2018-11	developmental biology	31475	407338
2018-11	ecology	32598	562642
2018-11	epidemiology	21583	260315
2018-11	evolutionary biology	59159	1409932
2018-11	genetics	64944	1573639
2018-11	genomics	122399	2846336
2018-11	immunology	21836	267879
2018-11	microbiology	63241	915082
2018-11	molecular biology	31697	483075
2018-11	neuroscience	202468	3184456
2018-11	paleontology	1606	22860
2018-11	pathology	4161	50211
2018-11	pharmacology and toxicology	4919	75390
2018-11	physiology	7821	84350
2018-11	plant biology	26862	408497
2018-11	scientific communication and education	9871	297793
2018-11	synthetic biology	13188	265104
2018-11	systems biology	35185	581559
2018-11	zoology	3225	59755
