# Supplementary material for: Tracking the popularity and outcomes of all bioRxiv preprints
Source: eLife journal article supplement (doi:10.7554/elife.45133), 2019-04-24
Supplement: supp [file elife-45133-supp-v1.zip › elife_poa_e45133_Figure_2_source_data_3.xlsx]

## Sheet: Sheet1
date	collection	sum	cumulative		animal behavior and cognition	biochemistry	bioengineering	bioinformatics	biophysics	cancer biology	cell biology	clinical trials	developmental biology	ecology	epidemiology	evolutionary biology	genetics	genomics	immunology	microbiology	molecular biology	neuroscience	paleontology	pathology	pharmacology and toxicology	physiology	plant biology	scientific communication and education	synthetic biology	systems biology	zoology
2013-11	biochemistry	53	53		0	53	0	0	0	0	0	0	0	0	0	0	0	0	0	0	0	0	0	0	0	0	0	0	0	0	0
2013-11	bioinformatics	300	300		0	53	0	300	0	0	0	0	0	0	0	0	0	0	0	0	0	0	0	0	0	0	0	0	0	0	0
2013-11	biophysics	47	47		0	53	0	300	47	0	0	0	0	0	0	0	0	0	0	0	0	0	0	0	0	0	0	0	0	0	0
2013-11	cancer biology	45	45		0	53	0	300	47	45	0	0	0	0	0	0	0	0	0	0	0	0	0	0	0	0	0	0	0	0	0
2013-11	cell biology	318	318		0	53	0	300	47	45	318	0	0	0	0	0	0	0	0	0	0	0	0	0	0	0	0	0	0	0	0
2013-11	developmental biology	214	214		0	53	0	300	47	45	318	0	214	0	0	0	0	0	0	0	0	0	0	0	0	0	0	0	0	0	0
2013-11	ecology	176	176		0	53	0	300	47	45	318	0	214	176	0	0	0	0	0	0	0	0	0	0	0	0	0	0	0	0	0
2013-11	evolutionary biology	501	501		0	53	0	300	47	45	318	0	214	176	0	501	0	0	0	0	0	0	0	0	0	0	0	0	0	0	0
2013-11	genetics	186	186		0	53	0	300	47	45	318	0	214	176	0	501	186	0	0	0	0	0	0	0	0	0	0	0	0	0	0
2013-11	genomics	685	685		0	53	0	300	47	45	318	0	214	176	0	501	186	685	0	0	0	0	0	0	0	0	0	0	0	0	0
2013-11	immunology	52	52		0	53	0	300	47	45	318	0	214	176	0	501	186	685	52	0	0	0	0	0	0	0	0	0	0	0	0
2013-11	microbiology	293	293		0	53	0	300	47	45	318	0	214	176	0	501	186	685	52	293	0	0	0	0	0	0	0	0	0	0	0
2013-11	molecular biology	50	50		0	53	0	300	47	45	318	0	214	176	0	501	186	685	52	293	50	0	0	0	0	0	0	0	0	0	0
2013-11	neuroscience	99	99		0	53	0	300	47	45	318	0	214	176	0	501	186	685	52	293	50	99	0	0	0	0	0	0	0	0	0
2013-11	plant biology	95	95		0	53	0	300	47	45	318	0	214	176	0	501	186	685	52	293	50	99	0	0	0	0	95	0	0	0	0
2013-11	synthetic biology	426	426		0	53	0	300	47	45	318	0	214	176	0	501	186	685	52	293	50	99	0	0	0	0	95	0	426	0	0
2013-11	systems biology	150	150		0	53	0	300	47	45	318	0	214	176	0	501	186	685	52	293	50	99	0	0	0	0	95	0	426	150	0
2013-11	zoology	26	26		0	53	0	300	47	45	318	0	214	176	0	501	186	685	52	293	50	99	0	0	0	0	95	0	426	150	26
2013-12	biochemistry	88	141		0	141	0	300	47	45	318	0	214	176	0	501	186	685	52	293	50	99	0	0	0	0	95	0	426	150	26
2013-12	bioengineering	125	125		0	141	125	300	47	45	318	0	214	176	0	501	186	685	52	293	50	99	0	0	0	0	95	0	426	150	26
2013-12	bioinformatics	1523	1823		0	141	125	1823	47	45	318	0	214	176	0	501	186	685	52	293	50	99	0	0	0	0	95	0	426	150	26
2013-12	biophysics	268	315		0	141	125	1823	315	45	318	0	214	176	0	501	186	685	52	293	50	99	0	0	0	0	95	0	426	150	26
2013-12	cancer biology	272	317		0	141	125	1823	315	317	318	0	214	176	0	501	186	685	52	293	50	99	0	0	0	0	95	0	426	150	26
2013-12	cell biology	112	430		0	141	125	1823	315	317	430	0	214	176	0	501	186	685	52	293	50	99	0	0	0	0	95	0	426	150	26
2013-12	developmental biology	328	542		0	141	125	1823	315	317	430	0	542	176	0	501	186	685	52	293	50	99	0	0	0	0	95	0	426	150	26
2013-12	ecology	547	723		0	141	125	1823	315	317	430	0	542	723	0	501	186	685	52	293	50	99	0	0	0	0	95	0	426	150	26
2013-12	evolutionary biology	1386	1887		0	141	125	1823	315	317	430	0	542	723	0	1887	186	685	52	293	50	99	0	0	0	0	95	0	426	150	26
2013-12	genetics	2779	2965		0	141	125	1823	315	317	430	0	542	723	0	1887	2965	685	52	293	50	99	0	0	0	0	95	0	426	150	26
2013-12	genomics	2131	2816		0	141	125	1823	315	317	430	0	542	723	0	1887	2965	2816	52	293	50	99	0	0	0	0	95	0	426	150	26
2013-12	immunology	117	169		0	141	125	1823	315	317	430	0	542	723	0	1887	2965	2816	169	293	50	99	0	0	0	0	95	0	426	150	26
2013-12	microbiology	247	540		0	141	125	1823	315	317	430	0	542	723	0	1887	2965	2816	169	540	50	99	0	0	0	0	95	0	426	150	26
2013-12	molecular biology	116	166		0	141	125	1823	315	317	430	0	542	723	0	1887	2965	2816	169	540	166	99	0	0	0	0	95	0	426	150	26
2013-12	neuroscience	1490	1589		0	141	125	1823	315	317	430	0	542	723	0	1887	2965	2816	169	540	166	1589	0	0	0	0	95	0	426	150	26
2013-12	plant biology	1236	1331		0	141	125	1823	315	317	430	0	542	723	0	1887	2965	2816	169	540	166	1589	0	0	0	0	1331	0	426	150	26
2013-12	synthetic biology	427	853		0	141	125	1823	315	317	430	0	542	723	0	1887	2965	2816	169	540	166	1589	0	0	0	0	1331	0	853	150	26
2013-12	systems biology	271	421		0	141	125	1823	315	317	430	0	542	723	0	1887	2965	2816	169	540	166	1589	0	0	0	0	1331	0	853	421	26
2013-12	zoology	89	115		0	141	125	1823	315	317	430	0	542	723	0	1887	2965	2816	169	540	166	1589	0	0	0	0	1331	0	853	421	115
2014-01	biochemistry	134	275		0	275	125	1823	315	317	430	0	542	723	0	1887	2965	2816	169	540	166	1589	0	0	0	0	1331	0	853	421	115
2014-01	bioengineering	271	396		0	275	396	1823	315	317	430	0	542	723	0	1887	2965	2816	169	540	166	1589	0	0	0	0	1331	0	853	421	115
2014-01	bioinformatics	2089	3912		0	275	396	3912	315	317	430	0	542	723	0	1887	2965	2816	169	540	166	1589	0	0	0	0	1331	0	853	421	115
2014-01	biophysics	484	799		0	275	396	3912	799	317	430	0	542	723	0	1887	2965	2816	169	540	166	1589	0	0	0	0	1331	0	853	421	115
2014-01	cancer biology	299	616		0	275	396	3912	799	616	430	0	542	723	0	1887	2965	2816	169	540	166	1589	0	0	0	0	1331	0	853	421	115
2014-01	cell biology	452	882		0	275	396	3912	799	616	882	0	542	723	0	1887	2965	2816	169	540	166	1589	0	0	0	0	1331	0	853	421	115
2014-01	developmental biology	309	851		0	275	396	3912	799	616	882	0	851	723	0	1887	2965	2816	169	540	166	1589	0	0	0	0	1331	0	853	421	115
2014-01	ecology	1117	1840		0	275	396	3912	799	616	882	0	851	1840	0	1887	2965	2816	169	540	166	1589	0	0	0	0	1331	0	853	421	115
2014-01	evolutionary biology	1697	3584		0	275	396	3912	799	616	882	0	851	1840	0	3584	2965	2816	169	540	166	1589	0	0	0	0	1331	0	853	421	115
2014-01	genetics	4273	7238		0	275	396	3912	799	616	882	0	851	1840	0	3584	7238	2816	169	540	166	1589	0	0	0	0	1331	0	853	421	115
2014-01	genomics	2471	5287		0	275	396	3912	799	616	882	0	851	1840	0	3584	7238	5287	169	540	166	1589	0	0	0	0	1331	0	853	421	115
2014-01	immunology	151	320		0	275	396	3912	799	616	882	0	851	1840	0	3584	7238	5287	320	540	166	1589	0	0	0	0	1331	0	853	421	115
2014-01	microbiology	189	729		0	275	396	3912	799	616	882	0	851	1840	0	3584	7238	5287	320	729	166	1589	0	0	0	0	1331	0	853	421	115
2014-01	molecular biology	86	252		0	275	396	3912	799	616	882	0	851	1840	0	3584	7238	5287	320	729	252	1589	0	0	0	0	1331	0	853	421	115
2014-01	neuroscience	1082	2671		0	275	396	3912	799	616	882	0	851	1840	0	3584	7238	5287	320	729	252	2671	0	0	0	0	1331	0	853	421	115
2014-01	plant biology	334	1665		0	275	396	3912	799	616	882	0	851	1840	0	3584	7238	5287	320	729	252	2671	0	0	0	0	1665	0	853	421	115
2014-01	synthetic biology	262	1115		0	275	396	3912	799	616	882	0	851	1840	0	3584	7238	5287	320	729	252	2671	0	0	0	0	1665	0	1115	421	115
2014-01	systems biology	193	614		0	275	396	3912	799	616	882	0	851	1840	0	3584	7238	5287	320	729	252	2671	0	0	0	0	1665	0	1115	614	115
2014-01	zoology	496	611		0	275	396	3912	799	616	882	0	851	1840	0	3584	7238	5287	320	729	252	2671	0	0	0	0	1665	0	1115	614	611
2014-02	biochemistry	112	387		0	387	396	3912	799	616	882	0	851	1840	0	3584	7238	5287	320	729	252	2671	0	0	0	0	1665	0	1115	614	611
2014-02	bioengineering	36	432		0	387	432	3912	799	616	882	0	851	1840	0	3584	7238	5287	320	729	252	2671	0	0	0	0	1665	0	1115	614	611
2014-02	bioinformatics	3099	7011		0	387	432	7011	799	616	882	0	851	1840	0	3584	7238	5287	320	729	252	2671	0	0	0	0	1665	0	1115	614	611
2014-02	biophysics	345	1144		0	387	432	7011	1144	616	882	0	851	1840	0	3584	7238	5287	320	729	252	2671	0	0	0	0	1665	0	1115	614	611
2014-02	cancer biology	249	865		0	387	432	7011	1144	865	882	0	851	1840	0	3584	7238	5287	320	729	252	2671	0	0	0	0	1665	0	1115	614	611
2014-02	cell biology	448	1330		0	387	432	7011	1144	865	1330	0	851	1840	0	3584	7238	5287	320	729	252	2671	0	0	0	0	1665	0	1115	614	611
2014-02	developmental biology	334	1185		0	387	432	7011	1144	865	1330	0	1185	1840	0	3584	7238	5287	320	729	252	2671	0	0	0	0	1665	0	1115	614	611
2014-02	ecology	692	2532		0	387	432	7011	1144	865	1330	0	1185	2532	0	3584	7238	5287	320	729	252	2671	0	0	0	0	1665	0	1115	614	611
2014-02	evolutionary biology	1928	5512		0	387	432	7011	1144	865	1330	0	1185	2532	0	5512	7238	5287	320	729	252	2671	0	0	0	0	1665	0	1115	614	611
2014-02	genetics	2726	9964		0	387	432	7011	1144	865	1330	0	1185	2532	0	5512	9964	5287	320	729	252	2671	0	0	0	0	1665	0	1115	614	611
2014-02	genomics	2800	8087		0	387	432	7011	1144	865	1330	0	1185	2532	0	5512	9964	8087	320	729	252	2671	0	0	0	0	1665	0	1115	614	611
2014-02	immunology	216	536		0	387	432	7011	1144	865	1330	0	1185	2532	0	5512	9964	8087	536	729	252	2671	0	0	0	0	1665	0	1115	614	611
2014-02	microbiology	177	906		0	387	432	7011	1144	865	1330	0	1185	2532	0	5512	9964	8087	536	906	252	2671	0	0	0	0	1665	0	1115	614	611
2014-02	molecular biology	57	309		0	387	432	7011	1144	865	1330	0	1185	2532	0	5512	9964	8087	536	906	309	2671	0	0	0	0	1665	0	1115	614	611
2014-02	neuroscience	1015	3686		0	387	432	7011	1144	865	1330	0	1185	2532	0	5512	9964	8087	536	906	309	3686	0	0	0	0	1665	0	1115	614	611
2014-02	plant biology	113	1778		0	387	432	7011	1144	865	1330	0	1185	2532	0	5512	9964	8087	536	906	309	3686	0	0	0	0	1778	0	1115	614	611
2014-02	synthetic biology	178	1293		0	387	432	7011	1144	865	1330	0	1185	2532	0	5512	9964	8087	536	906	309	3686	0	0	0	0	1778	0	1293	614	611
2014-02	systems biology	218	832		0	387	432	7011	1144	865	1330	0	1185	2532	0	5512	9964	8087	536	906	309	3686	0	0	0	0	1778	0	1293	832	611
2014-02	zoology	109	720		0	387	432	7011	1144	865	1330	0	1185	2532	0	5512	9964	8087	536	906	309	3686	0	0	0	0	1778	0	1293	832	720
2014-03	biochemistry	103	490		0	490	432	7011	1144	865	1330	0	1185	2532	0	5512	9964	8087	536	906	309	3686	0	0	0	0	1778	0	1293	832	720
2014-03	bioengineering	154	586		0	490	586	7011	1144	865	1330	0	1185	2532	0	5512	9964	8087	536	906	309	3686	0	0	0	0	1778	0	1293	832	720
2014-03	bioinformatics	3850	10861		0	490	586	10861	1144	865	1330	0	1185	2532	0	5512	9964	8087	536	906	309	3686	0	0	0	0	1778	0	1293	832	720
2014-03	biophysics	444	1588		0	490	586	10861	1588	865	1330	0	1185	2532	0	5512	9964	8087	536	906	309	3686	0	0	0	0	1778	0	1293	832	720
2014-03	cancer biology	163	1028		0	490	586	10861	1588	1028	1330	0	1185	2532	0	5512	9964	8087	536	906	309	3686	0	0	0	0	1778	0	1293	832	720
2014-03	cell biology	509	1839		0	490	586	10861	1588	1028	1839	0	1185	2532	0	5512	9964	8087	536	906	309	3686	0	0	0	0	1778	0	1293	832	720
2014-03	developmental biology	234	1419		0	490	586	10861	1588	1028	1839	0	1419	2532	0	5512	9964	8087	536	906	309	3686	0	0	0	0	1778	0	1293	832	720
2014-03	ecology	722	3254		0	490	586	10861	1588	1028	1839	0	1419	3254	0	5512	9964	8087	536	906	309	3686	0	0	0	0	1778	0	1293	832	720
2014-03	evolutionary biology	3412	8924		0	490	586	10861	1588	1028	1839	0	1419	3254	0	8924	9964	8087	536	906	309	3686	0	0	0	0	1778	0	1293	832	720
2014-03	genetics	1795	11759		0	490	586	10861	1588	1028	1839	0	1419	3254	0	8924	11759	8087	536	906	309	3686	0	0	0	0	1778	0	1293	832	720
2014-03	genomics	2846	10933		0	490	586	10861	1588	1028	1839	0	1419	3254	0	8924	11759	10933	536	906	309	3686	0	0	0	0	1778	0	1293	832	720
2014-03	immunology	198	734		0	490	586	10861	1588	1028	1839	0	1419	3254	0	8924	11759	10933	734	906	309	3686	0	0	0	0	1778	0	1293	832	720
2014-03	microbiology	312	1218		0	490	586	10861	1588	1028	1839	0	1419	3254	0	8924	11759	10933	734	1218	309	3686	0	0	0	0	1778	0	1293	832	720
2014-03	molecular biology	101	410		0	490	586	10861	1588	1028	1839	0	1419	3254	0	8924	11759	10933	734	1218	410	3686	0	0	0	0	1778	0	1293	832	720
2014-03	neuroscience	960	4646		0	490	586	10861	1588	1028	1839	0	1419	3254	0	8924	11759	10933	734	1218	410	4646	0	0	0	0	1778	0	1293	832	720
2014-03	plant biology	267	2045		0	490	586	10861	1588	1028	1839	0	1419	3254	0	8924	11759	10933	734	1218	410	4646	0	0	0	0	2045	0	1293	832	720
2014-03	scientific communication and education	28	28		0	490	586	10861	1588	1028	1839	0	1419	3254	0	8924	11759	10933	734	1218	410	4646	0	0	0	0	2045	28	1293	832	720
2014-03	synthetic biology	769	2062		0	490	586	10861	1588	1028	1839	0	1419	3254	0	8924	11759	10933	734	1218	410	4646	0	0	0	0	2045	28	2062	832	720
2014-03	systems biology	303	1135		0	490	586	10861	1588	1028	1839	0	1419	3254	0	8924	11759	10933	734	1218	410	4646	0	0	0	0	2045	28	2062	1135	720
2014-03	zoology	96	816		0	490	586	10861	1588	1028	1839	0	1419	3254	0	8924	11759	10933	734	1218	410	4646	0	0	0	0	2045	28	2062	1135	816
2014-04	biochemistry	261	751		0	751	586	10861	1588	1028	1839	0	1419	3254	0	8924	11759	10933	734	1218	410	4646	0	0	0	0	2045	28	2062	1135	816
2014-04	bioengineering	100	686		0	751	686	10861	1588	1028	1839	0	1419	3254	0	8924	11759	10933	734	1218	410	4646	0	0	0	0	2045	28	2062	1135	816
2014-04	bioinformatics	4430	15291		0	751	686	15291	1588	1028	1839	0	1419	3254	0	8924	11759	10933	734	1218	410	4646	0	0	0	0	2045	28	2062	1135	816
2014-04	biophysics	410	1998		0	751	686	15291	1998	1028	1839	0	1419	3254	0	8924	11759	10933	734	1218	410	4646	0	0	0	0	2045	28	2062	1135	816
2014-04	cancer biology	174	1202		0	751	686	15291	1998	1202	1839	0	1419	3254	0	8924	11759	10933	734	1218	410	4646	0	0	0	0	2045	28	2062	1135	816
2014-04	cell biology	584	2423		0	751	686	15291	1998	1202	2423	0	1419	3254	0	8924	11759	10933	734	1218	410	4646	0	0	0	0	2045	28	2062	1135	816
2014-04	developmental biology	372	1791		0	751	686	15291	1998	1202	2423	0	1791	3254	0	8924	11759	10933	734	1218	410	4646	0	0	0	0	2045	28	2062	1135	816
2014-04	ecology	1128	4382		0	751	686	15291	1998	1202	2423	0	1791	4382	0	8924	11759	10933	734	1218	410	4646	0	0	0	0	2045	28	2062	1135	816
2014-04	evolutionary biology	6554	15478		0	751	686	15291	1998	1202	2423	0	1791	4382	0	15478	11759	10933	734	1218	410	4646	0	0	0	0	2045	28	2062	1135	816
2014-04	genetics	3805	15564		0	751	686	15291	1998	1202	2423	0	1791	4382	0	15478	15564	10933	734	1218	410	4646	0	0	0	0	2045	28	2062	1135	816
2014-04	genomics	5697	16630		0	751	686	15291	1998	1202	2423	0	1791	4382	0	15478	15564	16630	734	1218	410	4646	0	0	0	0	2045	28	2062	1135	816
2014-04	immunology	272	1006		0	751	686	15291	1998	1202	2423	0	1791	4382	0	15478	15564	16630	1006	1218	410	4646	0	0	0	0	2045	28	2062	1135	816
2014-04	microbiology	309	1527		0	751	686	15291	1998	1202	2423	0	1791	4382	0	15478	15564	16630	1006	1527	410	4646	0	0	0	0	2045	28	2062	1135	816
2014-04	molecular biology	408	818		0	751	686	15291	1998	1202	2423	0	1791	4382	0	15478	15564	16630	1006	1527	818	4646	0	0	0	0	2045	28	2062	1135	816
2014-04	neuroscience	1275	5921		0	751	686	15291	1998	1202	2423	0	1791	4382	0	15478	15564	16630	1006	1527	818	5921	0	0	0	0	2045	28	2062	1135	816
2014-04	pathology	20	20		0	751	686	15291	1998	1202	2423	0	1791	4382	0	15478	15564	16630	1006	1527	818	5921	0	20	0	0	2045	28	2062	1135	816
2014-04	physiology	179	179		0	751	686	15291	1998	1202	2423	0	1791	4382	0	15478	15564	16630	1006	1527	818	5921	0	20	0	179	2045	28	2062	1135	816
2014-04	plant biology	324	2369		0	751	686	15291	1998	1202	2423	0	1791	4382	0	15478	15564	16630	1006	1527	818	5921	0	20	0	179	2369	28	2062	1135	816
2014-04	scientific communication and education	65	93		0	751	686	15291	1998	1202	2423	0	1791	4382	0	15478	15564	16630	1006	1527	818	5921	0	20	0	179	2369	93	2062	1135	816
2014-04	synthetic biology	543	2605		0	751	686	15291	1998	1202	2423	0	1791	4382	0	15478	15564	16630	1006	1527	818	5921	0	20	0	179	2369	93	2605	1135	816
2014-04	systems biology	602	1737		0	751	686	15291	1998	1202	2423	0	1791	4382	0	15478	15564	16630	1006	1527	818	5921	0	20	0	179	2369	93	2605	1737	816
2014-04	zoology	60	876		0	751	686	15291	1998	1202	2423	0	1791	4382	0	15478	15564	16630	1006	1527	818	5921	0	20	0	179	2369	93	2605	1737	876
2014-05	biochemistry	346	1097		0	1097	686	15291	1998	1202	2423	0	1791	4382	0	15478	15564	16630	1006	1527	818	5921	0	20	0	179	2369	93	2605	1737	876
2014-05	bioengineering	114	800		0	1097	800	15291	1998	1202	2423	0	1791	4382	0	15478	15564	16630	1006	1527	818	5921	0	20	0	179	2369	93	2605	1737	876
2014-05	bioinformatics	7389	22680		0	1097	800	22680	1998	1202	2423	0	1791	4382	0	15478	15564	16630	1006	1527	818	5921	0	20	0	179	2369	93	2605	1737	876
2014-05	biophysics	470	2468		0	1097	800	22680	2468	1202	2423	0	1791	4382	0	15478	15564	16630	1006	1527	818	5921	0	20	0	179	2369	93	2605	1737	876
2014-05	cancer biology	212	1414		0	1097	800	22680	2468	1414	2423	0	1791	4382	0	15478	15564	16630	1006	1527	818	5921	0	20	0	179	2369	93	2605	1737	876
2014-05	cell biology	499	2922		0	1097	800	22680	2468	1414	2922	0	1791	4382	0	15478	15564	16630	1006	1527	818	5921	0	20	0	179	2369	93	2605	1737	876
2014-05	developmental biology	500	2291		0	1097	800	22680	2468	1414	2922	0	2291	4382	0	15478	15564	16630	1006	1527	818	5921	0	20	0	179	2369	93	2605	1737	876
2014-05	ecology	1062	5444		0	1097	800	22680	2468	1414	2922	0	2291	5444	0	15478	15564	16630	1006	1527	818	5921	0	20	0	179	2369	93	2605	1737	876
2014-05	evolutionary biology	4061	19539		0	1097	800	22680	2468	1414	2922	0	2291	5444	0	19539	15564	16630	1006	1527	818	5921	0	20	0	179	2369	93	2605	1737	876
2014-05	genetics	4364	19928		0	1097	800	22680	2468	1414	2922	0	2291	5444	0	19539	19928	16630	1006	1527	818	5921	0	20	0	179	2369	93	2605	1737	876
2014-05	genomics	4860	21490		0	1097	800	22680	2468	1414	2922	0	2291	5444	0	19539	19928	21490	1006	1527	818	5921	0	20	0	179	2369	93	2605	1737	876
2014-05	immunology	283	1289		0	1097	800	22680	2468	1414	2922	0	2291	5444	0	19539	19928	21490	1289	1527	818	5921	0	20	0	179	2369	93	2605	1737	876
2014-05	microbiology	347	1874		0	1097	800	22680	2468	1414	2922	0	2291	5444	0	19539	19928	21490	1289	1874	818	5921	0	20	0	179	2369	93	2605	1737	876
2014-05	molecular biology	383	1201		0	1097	800	22680	2468	1414	2922	0	2291	5444	0	19539	19928	21490	1289	1874	1201	5921	0	20	0	179	2369	93	2605	1737	876
2014-05	neuroscience	2535	8456		0	1097	800	22680	2468	1414	2922	0	2291	5444	0	19539	19928	21490	1289	1874	1201	8456	0	20	0	179	2369	93	2605	1737	876
2014-05	pathology	25	45		0	1097	800	22680	2468	1414	2922	0	2291	5444	0	19539	19928	21490	1289	1874	1201	8456	0	45	0	179	2369	93	2605	1737	876
2014-05	pharmacology and toxicology	55	55		0	1097	800	22680	2468	1414	2922	0	2291	5444	0	19539	19928	21490	1289	1874	1201	8456	0	45	55	179	2369	93	2605	1737	876
2014-05	physiology	90	269		0	1097	800	22680	2468	1414	2922	0	2291	5444	0	19539	19928	21490	1289	1874	1201	8456	0	45	55	269	2369	93	2605	1737	876
2014-05	plant biology	288	2657		0	1097	800	22680	2468	1414	2922	0	2291	5444	0	19539	19928	21490	1289	1874	1201	8456	0	45	55	269	2657	93	2605	1737	876
2014-05	scientific communication and education	93	186		0	1097	800	22680	2468	1414	2922	0	2291	5444	0	19539	19928	21490	1289	1874	1201	8456	0	45	55	269	2657	186	2605	1737	876
2014-05	synthetic biology	667	3272		0	1097	800	22680	2468	1414	2922	0	2291	5444	0	19539	19928	21490	1289	1874	1201	8456	0	45	55	269	2657	186	3272	1737	876
2014-05	systems biology	1196	2933		0	1097	800	22680	2468	1414	2922	0	2291	5444	0	19539	19928	21490	1289	1874	1201	8456	0	45	55	269	2657	186	3272	2933	876
2014-05	zoology	53	929		0	1097	800	22680	2468	1414	2922	0	2291	5444	0	19539	19928	21490	1289	1874	1201	8456	0	45	55	269	2657	186	3272	2933	929
2014-06	biochemistry	355	1452		0	1452	800	22680	2468	1414	2922	0	2291	5444	0	19539	19928	21490	1289	1874	1201	8456	0	45	55	269	2657	186	3272	2933	929
2014-06	bioengineering	289	1089		0	1452	1089	22680	2468	1414	2922	0	2291	5444	0	19539	19928	21490	1289	1874	1201	8456	0	45	55	269	2657	186	3272	2933	929
2014-06	bioinformatics	8389	31069		0	1452	1089	31069	2468	1414	2922	0	2291	5444	0	19539	19928	21490	1289	1874	1201	8456	0	45	55	269	2657	186	3272	2933	929
2014-06	biophysics	457	2925		0	1452	1089	31069	2925	1414	2922	0	2291	5444	0	19539	19928	21490	1289	1874	1201	8456	0	45	55	269	2657	186	3272	2933	929
2014-06	cancer biology	381	1795		0	1452	1089	31069	2925	1795	2922	0	2291	5444	0	19539	19928	21490	1289	1874	1201	8456	0	45	55	269	2657	186	3272	2933	929
2014-06	cell biology	339	3261		0	1452	1089	31069	2925	1795	3261	0	2291	5444	0	19539	19928	21490	1289	1874	1201	8456	0	45	55	269	2657	186	3272	2933	929
2014-06	developmental biology	624	2915		0	1452	1089	31069	2925	1795	3261	0	2915	5444	0	19539	19928	21490	1289	1874	1201	8456	0	45	55	269	2657	186	3272	2933	929
2014-06	ecology	941	6385		0	1452	1089	31069	2925	1795	3261	0	2915	6385	0	19539	19928	21490	1289	1874	1201	8456	0	45	55	269	2657	186	3272	2933	929
2014-06	evolutionary biology	4144	23683		0	1452	1089	31069	2925	1795	3261	0	2915	6385	0	23683	19928	21490	1289	1874	1201	8456	0	45	55	269	2657	186	3272	2933	929
2014-06	genetics	3289	23217		0	1452	1089	31069	2925	1795	3261	0	2915	6385	0	23683	23217	21490	1289	1874	1201	8456	0	45	55	269	2657	186	3272	2933	929
2014-06	genomics	6639	28129		0	1452	1089	31069	2925	1795	3261	0	2915	6385	0	23683	23217	28129	1289	1874	1201	8456	0	45	55	269	2657	186	3272	2933	929
2014-06	immunology	232	1521		0	1452	1089	31069	2925	1795	3261	0	2915	6385	0	23683	23217	28129	1521	1874	1201	8456	0	45	55	269	2657	186	3272	2933	929
2014-06	microbiology	347	2221		0	1452	1089	31069	2925	1795	3261	0	2915	6385	0	23683	23217	28129	1521	2221	1201	8456	0	45	55	269	2657	186	3272	2933	929
2014-06	molecular biology	272	1473		0	1452	1089	31069	2925	1795	3261	0	2915	6385	0	23683	23217	28129	1521	2221	1473	8456	0	45	55	269	2657	186	3272	2933	929
2014-06	neuroscience	1812	10268		0	1452	1089	31069	2925	1795	3261	0	2915	6385	0	23683	23217	28129	1521	2221	1473	10268	0	45	55	269	2657	186	3272	2933	929
2014-06	paleontology	24	24		0	1452	1089	31069	2925	1795	3261	0	2915	6385	0	23683	23217	28129	1521	2221	1473	10268	24	45	55	269	2657	186	3272	2933	929
2014-06	pathology	22	67		0	1452	1089	31069	2925	1795	3261	0	2915	6385	0	23683	23217	28129	1521	2221	1473	10268	24	67	55	269	2657	186	3272	2933	929
2014-06	pharmacology and toxicology	171	226		0	1452	1089	31069	2925	1795	3261	0	2915	6385	0	23683	23217	28129	1521	2221	1473	10268	24	67	226	269	2657	186	3272	2933	929
2014-06	physiology	64	333		0	1452	1089	31069	2925	1795	3261	0	2915	6385	0	23683	23217	28129	1521	2221	1473	10268	24	67	226	333	2657	186	3272	2933	929
2014-06	plant biology	327	2984		0	1452	1089	31069	2925	1795	3261	0	2915	6385	0	23683	23217	28129	1521	2221	1473	10268	24	67	226	333	2984	186	3272	2933	929
2014-06	scientific communication and education	52	238		0	1452	1089	31069	2925	1795	3261	0	2915	6385	0	23683	23217	28129	1521	2221	1473	10268	24	67	226	333	2984	238	3272	2933	929
2014-06	synthetic biology	500	3772		0	1452	1089	31069	2925	1795	3261	0	2915	6385	0	23683	23217	28129	1521	2221	1473	10268	24	67	226	333	2984	238	3772	2933	929
2014-06	systems biology	863	3796		0	1452	1089	31069	2925	1795	3261	0	2915	6385	0	23683	23217	28129	1521	2221	1473	10268	24	67	226	333	2984	238	3772	3796	929
2014-06	zoology	67	996		0	1452	1089	31069	2925	1795	3261	0	2915	6385	0	23683	23217	28129	1521	2221	1473	10268	24	67	226	333	2984	238	3772	3796	996
2014-07	animal behavior and cognition	313	313		313	1452	1089	31069	2925	1795	3261	0	2915	6385	0	23683	23217	28129	1521	2221	1473	10268	24	67	226	333	2984	238	3772	3796	996
2014-07	biochemistry	226	1678		313	1678	1089	31069	2925	1795	3261	0	2915	6385	0	23683	23217	28129	1521	2221	1473	10268	24	67	226	333	2984	238	3772	3796	996
2014-07	bioengineering	186	1275		313	1678	1275	31069	2925	1795	3261	0	2915	6385	0	23683	23217	28129	1521	2221	1473	10268	24	67	226	333	2984	238	3772	3796	996
2014-07	bioinformatics	9838	40907		313	1678	1275	40907	2925	1795	3261	0	2915	6385	0	23683	23217	28129	1521	2221	1473	10268	24	67	226	333	2984	238	3772	3796	996
2014-07	biophysics	603	3528		313	1678	1275	40907	3528	1795	3261	0	2915	6385	0	23683	23217	28129	1521	2221	1473	10268	24	67	226	333	2984	238	3772	3796	996
2014-07	cancer biology	272	2067		313	1678	1275	40907	3528	2067	3261	0	2915	6385	0	23683	23217	28129	1521	2221	1473	10268	24	67	226	333	2984	238	3772	3796	996
2014-07	cell biology	520	3781		313	1678	1275	40907	3528	2067	3781	0	2915	6385	0	23683	23217	28129	1521	2221	1473	10268	24	67	226	333	2984	238	3772	3796	996
2014-07	developmental biology	446	3361		313	1678	1275	40907	3528	2067	3781	0	3361	6385	0	23683	23217	28129	1521	2221	1473	10268	24	67	226	333	2984	238	3772	3796	996
2014-07	ecology	1091	7476		313	1678	1275	40907	3528	2067	3781	0	3361	7476	0	23683	23217	28129	1521	2221	1473	10268	24	67	226	333	2984	238	3772	3796	996
2014-07	evolutionary biology	4606	28289		313	1678	1275	40907	3528	2067	3781	0	3361	7476	0	28289	23217	28129	1521	2221	1473	10268	24	67	226	333	2984	238	3772	3796	996
2014-07	genetics	3134	26351		313	1678	1275	40907	3528	2067	3781	0	3361	7476	0	28289	26351	28129	1521	2221	1473	10268	24	67	226	333	2984	238	3772	3796	996
2014-07	genomics	7351	35480		313	1678	1275	40907	3528	2067	3781	0	3361	7476	0	28289	26351	35480	1521	2221	1473	10268	24	67	226	333	2984	238	3772	3796	996
2014-07	immunology	349	1870		313	1678	1275	40907	3528	2067	3781	0	3361	7476	0	28289	26351	35480	1870	2221	1473	10268	24	67	226	333	2984	238	3772	3796	996
2014-07	microbiology	436	2657		313	1678	1275	40907	3528	2067	3781	0	3361	7476	0	28289	26351	35480	1870	2657	1473	10268	24	67	226	333	2984	238	3772	3796	996
2014-07	molecular biology	1053	2526		313	1678	1275	40907	3528	2067	3781	0	3361	7476	0	28289	26351	35480	1870	2657	2526	10268	24	67	226	333	2984	238	3772	3796	996
2014-07	neuroscience	1794	12062		313	1678	1275	40907	3528	2067	3781	0	3361	7476	0	28289	26351	35480	1870	2657	2526	12062	24	67	226	333	2984	238	3772	3796	996
2014-07	paleontology	23	47		313	1678	1275	40907	3528	2067	3781	0	3361	7476	0	28289	26351	35480	1870	2657	2526	12062	47	67	226	333	2984	238	3772	3796	996
2014-07	pathology	147	214		313	1678	1275	40907	3528	2067	3781	0	3361	7476	0	28289	26351	35480	1870	2657	2526	12062	47	214	226	333	2984	238	3772	3796	996
2014-07	pharmacology and toxicology	117	343		313	1678	1275	40907	3528	2067	3781	0	3361	7476	0	28289	26351	35480	1870	2657	2526	12062	47	214	343	333	2984	238	3772	3796	996
2014-07	physiology	107	440		313	1678	1275	40907	3528	2067	3781	0	3361	7476	0	28289	26351	35480	1870	2657	2526	12062	47	214	343	440	2984	238	3772	3796	996
2014-07	plant biology	308	3292		313	1678	1275	40907	3528	2067	3781	0	3361	7476	0	28289	26351	35480	1870	2657	2526	12062	47	214	343	440	3292	238	3772	3796	996
2014-07	scientific communication and education	191	429		313	1678	1275	40907	3528	2067	3781	0	3361	7476	0	28289	26351	35480	1870	2657	2526	12062	47	214	343	440	3292	429	3772	3796	996
2014-07	synthetic biology	697	4469		313	1678	1275	40907	3528	2067	3781	0	3361	7476	0	28289	26351	35480	1870	2657	2526	12062	47	214	343	440	3292	429	4469	3796	996
2014-07	systems biology	967	4763		313	1678	1275	40907	3528	2067	3781	0	3361	7476	0	28289	26351	35480	1870	2657	2526	12062	47	214	343	440	3292	429	4469	4763	996
2014-07	zoology	98	1094		313	1678	1275	40907	3528	2067	3781	0	3361	7476	0	28289	26351	35480	1870	2657	2526	12062	47	214	343	440	3292	429	4469	4763	1094
2014-08	animal behavior and cognition	163	476		476	1678	1275	40907	3528	2067	3781	0	3361	7476	0	28289	26351	35480	1870	2657	2526	12062	47	214	343	440	3292	429	4469	4763	1094
2014-08	biochemistry	146	1824		476	1824	1275	40907	3528	2067	3781	0	3361	7476	0	28289	26351	35480	1870	2657	2526	12062	47	214	343	440	3292	429	4469	4763	1094
2014-08	bioengineering	296	1571		476	1824	1571	40907	3528	2067	3781	0	3361	7476	0	28289	26351	35480	1870	2657	2526	12062	47	214	343	440	3292	429	4469	4763	1094
2014-08	bioinformatics	8116	49023		476	1824	1571	49023	3528	2067	3781	0	3361	7476	0	28289	26351	35480	1870	2657	2526	12062	47	214	343	440	3292	429	4469	4763	1094
2014-08	biophysics	382	3910		476	1824	1571	49023	3910	2067	3781	0	3361	7476	0	28289	26351	35480	1870	2657	2526	12062	47	214	343	440	3292	429	4469	4763	1094
2014-08	cancer biology	209	2276		476	1824	1571	49023	3910	2276	3781	0	3361	7476	0	28289	26351	35480	1870	2657	2526	12062	47	214	343	440	3292	429	4469	4763	1094
2014-08	cell biology	446	4227		476	1824	1571	49023	3910	2276	4227	0	3361	7476	0	28289	26351	35480	1870	2657	2526	12062	47	214	343	440	3292	429	4469	4763	1094
2014-08	developmental biology	739	4100		476	1824	1571	49023	3910	2276	4227	0	4100	7476	0	28289	26351	35480	1870	2657	2526	12062	47	214	343	440	3292	429	4469	4763	1094
2014-08	ecology	1158	8634		476	1824	1571	49023	3910	2276	4227	0	4100	8634	0	28289	26351	35480	1870	2657	2526	12062	47	214	343	440	3292	429	4469	4763	1094
2014-08	evolutionary biology	3829	32118		476	1824	1571	49023	3910	2276	4227	0	4100	8634	0	32118	26351	35480	1870	2657	2526	12062	47	214	343	440	3292	429	4469	4763	1094
2014-08	genetics	3633	29984		476	1824	1571	49023	3910	2276	4227	0	4100	8634	0	32118	29984	35480	1870	2657	2526	12062	47	214	343	440	3292	429	4469	4763	1094
2014-08	genomics	5122	40602		476	1824	1571	49023	3910	2276	4227	0	4100	8634	0	32118	29984	40602	1870	2657	2526	12062	47	214	343	440	3292	429	4469	4763	1094
2014-08	immunology	225	2095		476	1824	1571	49023	3910	2276	4227	0	4100	8634	0	32118	29984	40602	2095	2657	2526	12062	47	214	343	440	3292	429	4469	4763	1094
2014-08	microbiology	371	3028		476	1824	1571	49023	3910	2276	4227	0	4100	8634	0	32118	29984	40602	2095	3028	2526	12062	47	214	343	440	3292	429	4469	4763	1094
2014-08	molecular biology	512	3038		476	1824	1571	49023	3910	2276	4227	0	4100	8634	0	32118	29984	40602	2095	3028	3038	12062	47	214	343	440	3292	429	4469	4763	1094
2014-08	neuroscience	1254	13316		476	1824	1571	49023	3910	2276	4227	0	4100	8634	0	32118	29984	40602	2095	3028	3038	13316	47	214	343	440	3292	429	4469	4763	1094
2014-08	paleontology	23	70		476	1824	1571	49023	3910	2276	4227	0	4100	8634	0	32118	29984	40602	2095	3028	3038	13316	70	214	343	440	3292	429	4469	4763	1094
2014-08	pathology	34	248		476	1824	1571	49023	3910	2276	4227	0	4100	8634	0	32118	29984	40602	2095	3028	3038	13316	70	248	343	440	3292	429	4469	4763	1094
2014-08	pharmacology and toxicology	68	411		476	1824	1571	49023	3910	2276	4227	0	4100	8634	0	32118	29984	40602	2095	3028	3038	13316	70	248	411	440	3292	429	4469	4763	1094
2014-08	physiology	59	499		476	1824	1571	49023	3910	2276	4227	0	4100	8634	0	32118	29984	40602	2095	3028	3038	13316	70	248	411	499	3292	429	4469	4763	1094
2014-08	plant biology	227	3519		476	1824	1571	49023	3910	2276	4227	0	4100	8634	0	32118	29984	40602	2095	3028	3038	13316	70	248	411	499	3519	429	4469	4763	1094
2014-08	scientific communication and education	136	565		476	1824	1571	49023	3910	2276	4227	0	4100	8634	0	32118	29984	40602	2095	3028	3038	13316	70	248	411	499	3519	565	4469	4763	1094
2014-08	synthetic biology	555	5024		476	1824	1571	49023	3910	2276	4227	0	4100	8634	0	32118	29984	40602	2095	3028	3038	13316	70	248	411	499	3519	565	5024	4763	1094
2014-08	systems biology	735	5498		476	1824	1571	49023	3910	2276	4227	0	4100	8634	0	32118	29984	40602	2095	3028	3038	13316	70	248	411	499	3519	565	5024	5498	1094
2014-08	zoology	61	1155		476	1824	1571	49023	3910	2276	4227	0	4100	8634	0	32118	29984	40602	2095	3028	3038	13316	70	248	411	499	3519	565	5024	5498	1155
2014-09	animal behavior and cognition	134	610		610	1824	1571	49023	3910	2276	4227	0	4100	8634	0	32118	29984	40602	2095	3028	3038	13316	70	248	411	499	3519	565	5024	5498	1155
2014-09	biochemistry	171	1995		610	1995	1571	49023	3910	2276	4227	0	4100	8634	0	32118	29984	40602	2095	3028	3038	13316	70	248	411	499	3519	565	5024	5498	1155
2014-09	bioengineering	144	1715		610	1995	1715	49023	3910	2276	4227	0	4100	8634	0	32118	29984	40602	2095	3028	3038	13316	70	248	411	499	3519	565	5024	5498	1155
2014-09	bioinformatics	10239	59262		610	1995	1715	59262	3910	2276	4227	0	4100	8634	0	32118	29984	40602	2095	3028	3038	13316	70	248	411	499	3519	565	5024	5498	1155
2014-09	biophysics	524	4434		610	1995	1715	59262	4434	2276	4227	0	4100	8634	0	32118	29984	40602	2095	3028	3038	13316	70	248	411	499	3519	565	5024	5498	1155
2014-09	cancer biology	399	2675		610	1995	1715	59262	4434	2675	4227	0	4100	8634	0	32118	29984	40602	2095	3028	3038	13316	70	248	411	499	3519	565	5024	5498	1155
2014-09	cell biology	450	4677		610	1995	1715	59262	4434	2675	4677	0	4100	8634	0	32118	29984	40602	2095	3028	3038	13316	70	248	411	499	3519	565	5024	5498	1155
2014-09	developmental biology	814	4914		610	1995	1715	59262	4434	2675	4677	0	4914	8634	0	32118	29984	40602	2095	3028	3038	13316	70	248	411	499	3519	565	5024	5498	1155
2014-09	ecology	1237	9871		610	1995	1715	59262	4434	2675	4677	0	4914	9871	0	32118	29984	40602	2095	3028	3038	13316	70	248	411	499	3519	565	5024	5498	1155
2014-09	evolutionary biology	5321	37439		610	1995	1715	59262	4434	2675	4677	0	4914	9871	0	37439	29984	40602	2095	3028	3038	13316	70	248	411	499	3519	565	5024	5498	1155
2014-09	genetics	7423	37407		610	1995	1715	59262	4434	2675	4677	0	4914	9871	0	37439	37407	40602	2095	3028	3038	13316	70	248	411	499	3519	565	5024	5498	1155
2014-09	genomics	7080	47682		610	1995	1715	59262	4434	2675	4677	0	4914	9871	0	37439	37407	47682	2095	3028	3038	13316	70	248	411	499	3519	565	5024	5498	1155
2014-09	immunology	294	2389		610	1995	1715	59262	4434	2675	4677	0	4914	9871	0	37439	37407	47682	2389	3028	3038	13316	70	248	411	499	3519	565	5024	5498	1155
2014-09	microbiology	518	3546		610	1995	1715	59262	4434	2675	4677	0	4914	9871	0	37439	37407	47682	2389	3546	3038	13316	70	248	411	499	3519	565	5024	5498	1155
2014-09	molecular biology	872	3910		610	1995	1715	59262	4434	2675	4677	0	4914	9871	0	37439	37407	47682	2389	3546	3910	13316	70	248	411	499	3519	565	5024	5498	1155
2014-09	neuroscience	1818	15134		610	1995	1715	59262	4434	2675	4677	0	4914	9871	0	37439	37407	47682	2389	3546	3910	15134	70	248	411	499	3519	565	5024	5498	1155
2014-09	paleontology	27	97		610	1995	1715	59262	4434	2675	4677	0	4914	9871	0	37439	37407	47682	2389	3546	3910	15134	97	248	411	499	3519	565	5024	5498	1155
2014-09	pathology	11	259		610	1995	1715	59262	4434	2675	4677	0	4914	9871	0	37439	37407	47682	2389	3546	3910	15134	97	259	411	499	3519	565	5024	5498	1155
2014-09	pharmacology and toxicology	66	477		610	1995	1715	59262	4434	2675	4677	0	4914	9871	0	37439	37407	47682	2389	3546	3910	15134	97	259	477	499	3519	565	5024	5498	1155
2014-09	physiology	124	623		610	1995	1715	59262	4434	2675	4677	0	4914	9871	0	37439	37407	47682	2389	3546	3910	15134	97	259	477	623	3519	565	5024	5498	1155
2014-09	plant biology	229	3748		610	1995	1715	59262	4434	2675	4677	0	4914	9871	0	37439	37407	47682	2389	3546	3910	15134	97	259	477	623	3748	565	5024	5498	1155
2014-09	scientific communication and education	195	760		610	1995	1715	59262	4434	2675	4677	0	4914	9871	0	37439	37407	47682	2389	3546	3910	15134	97	259	477	623	3748	760	5024	5498	1155
2014-09	synthetic biology	873	5897		610	1995	1715	59262	4434	2675	4677	0	4914	9871	0	37439	37407	47682	2389	3546	3910	15134	97	259	477	623	3748	760	5897	5498	1155
2014-09	systems biology	1078	6576		610	1995	1715	59262	4434	2675	4677	0	4914	9871	0	37439	37407	47682	2389	3546	3910	15134	97	259	477	623	3748	760	5897	6576	1155
2014-09	zoology	194	1349		610	1995	1715	59262	4434	2675	4677	0	4914	9871	0	37439	37407	47682	2389	3546	3910	15134	97	259	477	623	3748	760	5897	6576	1349
2014-10	animal behavior and cognition	258	868		868	1995	1715	59262	4434	2675	4677	0	4914	9871	0	37439	37407	47682	2389	3546	3910	15134	97	259	477	623	3748	760	5897	6576	1349
2014-10	biochemistry	177	2172		868	2172	1715	59262	4434	2675	4677	0	4914	9871	0	37439	37407	47682	2389	3546	3910	15134	97	259	477	623	3748	760	5897	6576	1349
2014-10	bioengineering	122	1837		868	2172	1837	59262	4434	2675	4677	0	4914	9871	0	37439	37407	47682	2389	3546	3910	15134	97	259	477	623	3748	760	5897	6576	1349
2014-10	bioinformatics	10875	70137		868	2172	1837	70137	4434	2675	4677	0	4914	9871	0	37439	37407	47682	2389	3546	3910	15134	97	259	477	623	3748	760	5897	6576	1349
2014-10	biophysics	663	5097		868	2172	1837	70137	5097	2675	4677	0	4914	9871	0	37439	37407	47682	2389	3546	3910	15134	97	259	477	623	3748	760	5897	6576	1349
2014-10	cancer biology	442	3117		868	2172	1837	70137	5097	3117	4677	0	4914	9871	0	37439	37407	47682	2389	3546	3910	15134	97	259	477	623	3748	760	5897	6576	1349
2014-10	cell biology	410	5087		868	2172	1837	70137	5097	3117	5087	0	4914	9871	0	37439	37407	47682	2389	3546	3910	15134	97	259	477	623	3748	760	5897	6576	1349
2014-10	developmental biology	808	5722		868	2172	1837	70137	5097	3117	5087	0	5722	9871	0	37439	37407	47682	2389	3546	3910	15134	97	259	477	623	3748	760	5897	6576	1349
2014-10	ecology	1816	11687		868	2172	1837	70137	5097	3117	5087	0	5722	11687	0	37439	37407	47682	2389	3546	3910	15134	97	259	477	623	3748	760	5897	6576	1349
2014-10	evolutionary biology	6328	43767		868	2172	1837	70137	5097	3117	5087	0	5722	11687	0	43767	37407	47682	2389	3546	3910	15134	97	259	477	623	3748	760	5897	6576	1349
2014-10	genetics	5682	43089		868	2172	1837	70137	5097	3117	5087	0	5722	11687	0	43767	43089	47682	2389	3546	3910	15134	97	259	477	623	3748	760	5897	6576	1349
2014-10	genomics	8594	56276		868	2172	1837	70137	5097	3117	5087	0	5722	11687	0	43767	43089	56276	2389	3546	3910	15134	97	259	477	623	3748	760	5897	6576	1349
2014-10	immunology	295	2684		868	2172	1837	70137	5097	3117	5087	0	5722	11687	0	43767	43089	56276	2684	3546	3910	15134	97	259	477	623	3748	760	5897	6576	1349
2014-10	microbiology	588	4134		868	2172	1837	70137	5097	3117	5087	0	5722	11687	0	43767	43089	56276	2684	4134	3910	15134	97	259	477	623	3748	760	5897	6576	1349
2014-10	molecular biology	980	4890		868	2172	1837	70137	5097	3117	5087	0	5722	11687	0	43767	43089	56276	2684	4134	4890	15134	97	259	477	623	3748	760	5897	6576	1349
2014-10	neuroscience	2584	17718		868	2172	1837	70137	5097	3117	5087	0	5722	11687	0	43767	43089	56276	2684	4134	4890	17718	97	259	477	623	3748	760	5897	6576	1349
2014-10	paleontology	42	139		868	2172	1837	70137	5097	3117	5087	0	5722	11687	0	43767	43089	56276	2684	4134	4890	17718	139	259	477	623	3748	760	5897	6576	1349
2014-10	pathology	14	273		868	2172	1837	70137	5097	3117	5087	0	5722	11687	0	43767	43089	56276	2684	4134	4890	17718	139	273	477	623	3748	760	5897	6576	1349
2014-10	pharmacology and toxicology	79	556		868	2172	1837	70137	5097	3117	5087	0	5722	11687	0	43767	43089	56276	2684	4134	4890	17718	139	273	556	623	3748	760	5897	6576	1349
2014-10	physiology	70	693		868	2172	1837	70137	5097	3117	5087	0	5722	11687	0	43767	43089	56276	2684	4134	4890	17718	139	273	556	693	3748	760	5897	6576	1349
2014-10	plant biology	724	4472		868	2172	1837	70137	5097	3117	5087	0	5722	11687	0	43767	43089	56276	2684	4134	4890	17718	139	273	556	693	4472	760	5897	6576	1349
2014-10	scientific communication and education	140	900		868	2172	1837	70137	5097	3117	5087	0	5722	11687	0	43767	43089	56276	2684	4134	4890	17718	139	273	556	693	4472	900	5897	6576	1349
2014-10	synthetic biology	918	6815		868	2172	1837	70137	5097	3117	5087	0	5722	11687	0	43767	43089	56276	2684	4134	4890	17718	139	273	556	693	4472	900	6815	6576	1349
2014-10	systems biology	897	7473		868	2172	1837	70137	5097	3117	5087	0	5722	11687	0	43767	43089	56276	2684	4134	4890	17718	139	273	556	693	4472	900	6815	7473	1349
2014-10	zoology	215	1564		868	2172	1837	70137	5097	3117	5087	0	5722	11687	0	43767	43089	56276	2684	4134	4890	17718	139	273	556	693	4472	900	6815	7473	1564
2014-11	animal behavior and cognition	201	1069		1069	2172	1837	70137	5097	3117	5087	0	5722	11687	0	43767	43089	56276	2684	4134	4890	17718	139	273	556	693	4472	900	6815	7473	1564
2014-11	biochemistry	162	2334		1069	2334	1837	70137	5097	3117	5087	0	5722	11687	0	43767	43089	56276	2684	4134	4890	17718	139	273	556	693	4472	900	6815	7473	1564
2014-11	bioengineering	119	1956		1069	2334	1956	70137	5097	3117	5087	0	5722	11687	0	43767	43089	56276	2684	4134	4890	17718	139	273	556	693	4472	900	6815	7473	1564
2014-11	bioinformatics	10200	80337		1069	2334	1956	80337	5097	3117	5087	0	5722	11687	0	43767	43089	56276	2684	4134	4890	17718	139	273	556	693	4472	900	6815	7473	1564
2014-11	biophysics	627	5724		1069	2334	1956	80337	5724	3117	5087	0	5722	11687	0	43767	43089	56276	2684	4134	4890	17718	139	273	556	693	4472	900	6815	7473	1564
2014-11	cancer biology	645	3762		1069	2334	1956	80337	5724	3762	5087	0	5722	11687	0	43767	43089	56276	2684	4134	4890	17718	139	273	556	693	4472	900	6815	7473	1564
2014-11	cell biology	340	5427		1069	2334	1956	80337	5724	3762	5427	0	5722	11687	0	43767	43089	56276	2684	4134	4890	17718	139	273	556	693	4472	900	6815	7473	1564
2014-11	developmental biology	784	6506		1069	2334	1956	80337	5724	3762	5427	0	6506	11687	0	43767	43089	56276	2684	4134	4890	17718	139	273	556	693	4472	900	6815	7473	1564
2014-11	ecology	1453	13140		1069	2334	1956	80337	5724	3762	5427	0	6506	13140	0	43767	43089	56276	2684	4134	4890	17718	139	273	556	693	4472	900	6815	7473	1564
2014-11	evolutionary biology	7619	51386		1069	2334	1956	80337	5724	3762	5427	0	6506	13140	0	51386	43089	56276	2684	4134	4890	17718	139	273	556	693	4472	900	6815	7473	1564
2014-11	genetics	4517	47606		1069	2334	1956	80337	5724	3762	5427	0	6506	13140	0	51386	47606	56276	2684	4134	4890	17718	139	273	556	693	4472	900	6815	7473	1564
2014-11	genomics	6516	62792		1069	2334	1956	80337	5724	3762	5427	0	6506	13140	0	51386	47606	62792	2684	4134	4890	17718	139	273	556	693	4472	900	6815	7473	1564
2014-11	immunology	253	2937		1069	2334	1956	80337	5724	3762	5427	0	6506	13140	0	51386	47606	62792	2937	4134	4890	17718	139	273	556	693	4472	900	6815	7473	1564
2014-11	microbiology	506	4640		1069	2334	1956	80337	5724	3762	5427	0	6506	13140	0	51386	47606	62792	2937	4640	4890	17718	139	273	556	693	4472	900	6815	7473	1564
2014-11	molecular biology	1438	6328		1069	2334	1956	80337	5724	3762	5427	0	6506	13140	0	51386	47606	62792	2937	4640	6328	17718	139	273	556	693	4472	900	6815	7473	1564
2014-11	neuroscience	3844	21562		1069	2334	1956	80337	5724	3762	5427	0	6506	13140	0	51386	47606	62792	2937	4640	6328	21562	139	273	556	693	4472	900	6815	7473	1564
2014-11	paleontology	27	166		1069	2334	1956	80337	5724	3762	5427	0	6506	13140	0	51386	47606	62792	2937	4640	6328	21562	166	273	556	693	4472	900	6815	7473	1564
2014-11	pathology	13	286		1069	2334	1956	80337	5724	3762	5427	0	6506	13140	0	51386	47606	62792	2937	4640	6328	21562	166	286	556	693	4472	900	6815	7473	1564
2014-11	pharmacology and toxicology	101	657		1069	2334	1956	80337	5724	3762	5427	0	6506	13140	0	51386	47606	62792	2937	4640	6328	21562	166	286	657	693	4472	900	6815	7473	1564
2014-11	physiology	74	767		1069	2334	1956	80337	5724	3762	5427	0	6506	13140	0	51386	47606	62792	2937	4640	6328	21562	166	286	657	767	4472	900	6815	7473	1564
2014-11	plant biology	628	5100		1069	2334	1956	80337	5724	3762	5427	0	6506	13140	0	51386	47606	62792	2937	4640	6328	21562	166	286	657	767	5100	900	6815	7473	1564
2014-11	scientific communication and education	92	992		1069	2334	1956	80337	5724	3762	5427	0	6506	13140	0	51386	47606	62792	2937	4640	6328	21562	166	286	657	767	5100	992	6815	7473	1564
2014-11	synthetic biology	729	7544		1069	2334	1956	80337	5724	3762	5427	0	6506	13140	0	51386	47606	62792	2937	4640	6328	21562	166	286	657	767	5100	992	7544	7473	1564
2014-11	systems biology	1233	8706		1069	2334	1956	80337	5724	3762	5427	0	6506	13140	0	51386	47606	62792	2937	4640	6328	21562	166	286	657	767	5100	992	7544	8706	1564
2014-11	zoology	193	1757		1069	2334	1956	80337	5724	3762	5427	0	6506	13140	0	51386	47606	62792	2937	4640	6328	21562	166	286	657	767	5100	992	7544	8706	1757
2014-12	animal behavior and cognition	195	1264		1264	2334	1956	80337	5724	3762	5427	0	6506	13140	0	51386	47606	62792	2937	4640	6328	21562	166	286	657	767	5100	992	7544	8706	1757
2014-12	biochemistry	161	2495		1264	2495	1956	80337	5724	3762	5427	0	6506	13140	0	51386	47606	62792	2937	4640	6328	21562	166	286	657	767	5100	992	7544	8706	1757
2014-12	bioengineering	153	2109		1264	2495	2109	80337	5724	3762	5427	0	6506	13140	0	51386	47606	62792	2937	4640	6328	21562	166	286	657	767	5100	992	7544	8706	1757
2014-12	bioinformatics	9396	89733		1264	2495	2109	89733	5724	3762	5427	0	6506	13140	0	51386	47606	62792	2937	4640	6328	21562	166	286	657	767	5100	992	7544	8706	1757
2014-12	biophysics	558	6282		1264	2495	2109	89733	6282	3762	5427	0	6506	13140	0	51386	47606	62792	2937	4640	6328	21562	166	286	657	767	5100	992	7544	8706	1757
2014-12	cancer biology	652	4414		1264	2495	2109	89733	6282	4414	5427	0	6506	13140	0	51386	47606	62792	2937	4640	6328	21562	166	286	657	767	5100	992	7544	8706	1757
2014-12	cell biology	370	5797		1264	2495	2109	89733	6282	4414	5797	0	6506	13140	0	51386	47606	62792	2937	4640	6328	21562	166	286	657	767	5100	992	7544	8706	1757
2014-12	developmental biology	697	7203		1264	2495	2109	89733	6282	4414	5797	0	7203	13140	0	51386	47606	62792	2937	4640	6328	21562	166	286	657	767	5100	992	7544	8706	1757
2014-12	ecology	1436	14576		1264	2495	2109	89733	6282	4414	5797	0	7203	14576	0	51386	47606	62792	2937	4640	6328	21562	166	286	657	767	5100	992	7544	8706	1757
2014-12	evolutionary biology	8458	59844		1264	2495	2109	89733	6282	4414	5797	0	7203	14576	0	59844	47606	62792	2937	4640	6328	21562	166	286	657	767	5100	992	7544	8706	1757
2014-12	genetics	5049	52655		1264	2495	2109	89733	6282	4414	5797	0	7203	14576	0	59844	52655	62792	2937	4640	6328	21562	166	286	657	767	5100	992	7544	8706	1757
2014-12	genomics	6676	69468		1264	2495	2109	89733	6282	4414	5797	0	7203	14576	0	59844	52655	69468	2937	4640	6328	21562	166	286	657	767	5100	992	7544	8706	1757
2014-12	immunology	334	3271		1264	2495	2109	89733	6282	4414	5797	0	7203	14576	0	59844	52655	69468	3271	4640	6328	21562	166	286	657	767	5100	992	7544	8706	1757
2014-12	microbiology	572	5212		1264	2495	2109	89733	6282	4414	5797	0	7203	14576	0	59844	52655	69468	3271	5212	6328	21562	166	286	657	767	5100	992	7544	8706	1757
2014-12	molecular biology	703	7031		1264	2495	2109	89733	6282	4414	5797	0	7203	14576	0	59844	52655	69468	3271	5212	7031	21562	166	286	657	767	5100	992	7544	8706	1757
2014-12	neuroscience	3138	24700		1264	2495	2109	89733	6282	4414	5797	0	7203	14576	0	59844	52655	69468	3271	5212	7031	24700	166	286	657	767	5100	992	7544	8706	1757
2014-12	paleontology	39	205		1264	2495	2109	89733	6282	4414	5797	0	7203	14576	0	59844	52655	69468	3271	5212	7031	24700	205	286	657	767	5100	992	7544	8706	1757
2014-12	pathology	47	333		1264	2495	2109	89733	6282	4414	5797	0	7203	14576	0	59844	52655	69468	3271	5212	7031	24700	205	333	657	767	5100	992	7544	8706	1757
2014-12	pharmacology and toxicology	91	748		1264	2495	2109	89733	6282	4414	5797	0	7203	14576	0	59844	52655	69468	3271	5212	7031	24700	205	333	748	767	5100	992	7544	8706	1757
2014-12	physiology	110	877		1264	2495	2109	89733	6282	4414	5797	0	7203	14576	0	59844	52655	69468	3271	5212	7031	24700	205	333	748	877	5100	992	7544	8706	1757
2014-12	plant biology	727	5827		1264	2495	2109	89733	6282	4414	5797	0	7203	14576	0	59844	52655	69468	3271	5212	7031	24700	205	333	748	877	5827	992	7544	8706	1757
2014-12	scientific communication and education	101	1093		1264	2495	2109	89733	6282	4414	5797	0	7203	14576	0	59844	52655	69468	3271	5212	7031	24700	205	333	748	877	5827	1093	7544	8706	1757
2014-12	synthetic biology	999	8543		1264	2495	2109	89733	6282	4414	5797	0	7203	14576	0	59844	52655	69468	3271	5212	7031	24700	205	333	748	877	5827	1093	8543	8706	1757
2014-12	systems biology	1287	9993		1264	2495	2109	89733	6282	4414	5797	0	7203	14576	0	59844	52655	69468	3271	5212	7031	24700	205	333	748	877	5827	1093	8543	9993	1757
2014-12	zoology	158	1915		1264	2495	2109	89733	6282	4414	5797	0	7203	14576	0	59844	52655	69468	3271	5212	7031	24700	205	333	748	877	5827	1093	8543	9993	1915
2015-01	animal behavior and cognition	206	1470		1470	2495	2109	89733	6282	4414	5797	0	7203	14576	0	59844	52655	69468	3271	5212	7031	24700	205	333	748	877	5827	1093	8543	9993	1915
2015-01	biochemistry	171	2666		1470	2666	2109	89733	6282	4414	5797	0	7203	14576	0	59844	52655	69468	3271	5212	7031	24700	205	333	748	877	5827	1093	8543	9993	1915
2015-01	bioengineering	210	2319		1470	2666	2319	89733	6282	4414	5797	0	7203	14576	0	59844	52655	69468	3271	5212	7031	24700	205	333	748	877	5827	1093	8543	9993	1915
2015-01	bioinformatics	12574	102307		1470	2666	2319	102307	6282	4414	5797	0	7203	14576	0	59844	52655	69468	3271	5212	7031	24700	205	333	748	877	5827	1093	8543	9993	1915
2015-01	biophysics	600	6882		1470	2666	2319	102307	6882	4414	5797	0	7203	14576	0	59844	52655	69468	3271	5212	7031	24700	205	333	748	877	5827	1093	8543	9993	1915
2015-01	cancer biology	883	5297		1470	2666	2319	102307	6882	5297	5797	0	7203	14576	0	59844	52655	69468	3271	5212	7031	24700	205	333	748	877	5827	1093	8543	9993	1915
2015-01	cell biology	829	6626		1470	2666	2319	102307	6882	5297	6626	0	7203	14576	0	59844	52655	69468	3271	5212	7031	24700	205	333	748	877	5827	1093	8543	9993	1915
2015-01	developmental biology	849	8052		1470	2666	2319	102307	6882	5297	6626	0	8052	14576	0	59844	52655	69468	3271	5212	7031	24700	205	333	748	877	5827	1093	8543	9993	1915
2015-01	ecology	1700	16276		1470	2666	2319	102307	6882	5297	6626	0	8052	16276	0	59844	52655	69468	3271	5212	7031	24700	205	333	748	877	5827	1093	8543	9993	1915
2015-01	evolutionary biology	8331	68175		1470	2666	2319	102307	6882	5297	6626	0	8052	16276	0	68175	52655	69468	3271	5212	7031	24700	205	333	748	877	5827	1093	8543	9993	1915
2015-01	genetics	5097	57752		1470	2666	2319	102307	6882	5297	6626	0	8052	16276	0	68175	57752	69468	3271	5212	7031	24700	205	333	748	877	5827	1093	8543	9993	1915
2015-01	genomics	10936	80404		1470	2666	2319	102307	6882	5297	6626	0	8052	16276	0	68175	57752	80404	3271	5212	7031	24700	205	333	748	877	5827	1093	8543	9993	1915
2015-01	immunology	232	3503		1470	2666	2319	102307	6882	5297	6626	0	8052	16276	0	68175	57752	80404	3503	5212	7031	24700	205	333	748	877	5827	1093	8543	9993	1915
2015-01	microbiology	539	5751		1470	2666	2319	102307	6882	5297	6626	0	8052	16276	0	68175	57752	80404	3503	5751	7031	24700	205	333	748	877	5827	1093	8543	9993	1915
2015-01	molecular biology	748	7779		1470	2666	2319	102307	6882	5297	6626	0	8052	16276	0	68175	57752	80404	3503	5751	7779	24700	205	333	748	877	5827	1093	8543	9993	1915
2015-01	neuroscience	4594	29294		1470	2666	2319	102307	6882	5297	6626	0	8052	16276	0	68175	57752	80404	3503	5751	7779	29294	205	333	748	877	5827	1093	8543	9993	1915
2015-01	paleontology	18	223		1470	2666	2319	102307	6882	5297	6626	0	8052	16276	0	68175	57752	80404	3503	5751	7779	29294	223	333	748	877	5827	1093	8543	9993	1915
2015-01	pathology	13	346		1470	2666	2319	102307	6882	5297	6626	0	8052	16276	0	68175	57752	80404	3503	5751	7779	29294	223	346	748	877	5827	1093	8543	9993	1915
2015-01	pharmacology and toxicology	96	844		1470	2666	2319	102307	6882	5297	6626	0	8052	16276	0	68175	57752	80404	3503	5751	7779	29294	223	346	844	877	5827	1093	8543	9993	1915
2015-01	physiology	105	982		1470	2666	2319	102307	6882	5297	6626	0	8052	16276	0	68175	57752	80404	3503	5751	7779	29294	223	346	844	982	5827	1093	8543	9993	1915
2015-01	plant biology	762	6589		1470	2666	2319	102307	6882	5297	6626	0	8052	16276	0	68175	57752	80404	3503	5751	7779	29294	223	346	844	982	6589	1093	8543	9993	1915
2015-01	scientific communication and education	82	1175		1470	2666	2319	102307	6882	5297	6626	0	8052	16276	0	68175	57752	80404	3503	5751	7779	29294	223	346	844	982	6589	1175	8543	9993	1915
2015-01	synthetic biology	1299	9842		1470	2666	2319	102307	6882	5297	6626	0	8052	16276	0	68175	57752	80404	3503	5751	7779	29294	223	346	844	982	6589	1175	9842	9993	1915
2015-01	systems biology	1543	11536		1470	2666	2319	102307	6882	5297	6626	0	8052	16276	0	68175	57752	80404	3503	5751	7779	29294	223	346	844	982	6589	1175	9842	11536	1915
2015-01	zoology	103	2018		1470	2666	2319	102307	6882	5297	6626	0	8052	16276	0	68175	57752	80404	3503	5751	7779	29294	223	346	844	982	6589	1175	9842	11536	2018
2015-02	animal behavior and cognition	256	1726		1726	2666	2319	102307	6882	5297	6626	0	8052	16276	0	68175	57752	80404	3503	5751	7779	29294	223	346	844	982	6589	1175	9842	11536	2018
2015-02	biochemistry	349	3015		1726	3015	2319	102307	6882	5297	6626	0	8052	16276	0	68175	57752	80404	3503	5751	7779	29294	223	346	844	982	6589	1175	9842	11536	2018
2015-02	bioengineering	929	3248		1726	3015	3248	102307	6882	5297	6626	0	8052	16276	0	68175	57752	80404	3503	5751	7779	29294	223	346	844	982	6589	1175	9842	11536	2018
2015-02	bioinformatics	11525	113832		1726	3015	3248	113832	6882	5297	6626	0	8052	16276	0	68175	57752	80404	3503	5751	7779	29294	223	346	844	982	6589	1175	9842	11536	2018
2015-02	biophysics	995	7877		1726	3015	3248	113832	7877	5297	6626	0	8052	16276	0	68175	57752	80404	3503	5751	7779	29294	223	346	844	982	6589	1175	9842	11536	2018
2015-02	cancer biology	728	6025		1726	3015	3248	113832	7877	6025	6626	0	8052	16276	0	68175	57752	80404	3503	5751	7779	29294	223	346	844	982	6589	1175	9842	11536	2018
2015-02	cell biology	481	7107		1726	3015	3248	113832	7877	6025	7107	0	8052	16276	0	68175	57752	80404	3503	5751	7779	29294	223	346	844	982	6589	1175	9842	11536	2018
2015-02	developmental biology	886	8938		1726	3015	3248	113832	7877	6025	7107	0	8938	16276	0	68175	57752	80404	3503	5751	7779	29294	223	346	844	982	6589	1175	9842	11536	2018
2015-02	ecology	2065	18341		1726	3015	3248	113832	7877	6025	7107	0	8938	18341	0	68175	57752	80404	3503	5751	7779	29294	223	346	844	982	6589	1175	9842	11536	2018
2015-02	evolutionary biology	8443	76618		1726	3015	3248	113832	7877	6025	7107	0	8938	18341	0	76618	57752	80404	3503	5751	7779	29294	223	346	844	982	6589	1175	9842	11536	2018
2015-02	genetics	21360	79112		1726	3015	3248	113832	7877	6025	7107	0	8938	18341	0	76618	79112	80404	3503	5751	7779	29294	223	346	844	982	6589	1175	9842	11536	2018
2015-02	genomics	9012	89416		1726	3015	3248	113832	7877	6025	7107	0	8938	18341	0	76618	79112	89416	3503	5751	7779	29294	223	346	844	982	6589	1175	9842	11536	2018
2015-02	immunology	455	3958		1726	3015	3248	113832	7877	6025	7107	0	8938	18341	0	76618	79112	89416	3958	5751	7779	29294	223	346	844	982	6589	1175	9842	11536	2018
2015-02	microbiology	552	6303		1726	3015	3248	113832	7877	6025	7107	0	8938	18341	0	76618	79112	89416	3958	6303	7779	29294	223	346	844	982	6589	1175	9842	11536	2018
2015-02	molecular biology	754	8533		1726	3015	3248	113832	7877	6025	7107	0	8938	18341	0	76618	79112	89416	3958	6303	8533	29294	223	346	844	982	6589	1175	9842	11536	2018
2015-02	neuroscience	4281	33575		1726	3015	3248	113832	7877	6025	7107	0	8938	18341	0	76618	79112	89416	3958	6303	8533	33575	223	346	844	982	6589	1175	9842	11536	2018
2015-02	paleontology	106	329		1726	3015	3248	113832	7877	6025	7107	0	8938	18341	0	76618	79112	89416	3958	6303	8533	33575	329	346	844	982	6589	1175	9842	11536	2018
2015-02	pathology	11	357		1726	3015	3248	113832	7877	6025	7107	0	8938	18341	0	76618	79112	89416	3958	6303	8533	33575	329	357	844	982	6589	1175	9842	11536	2018
2015-02	pharmacology and toxicology	88	932		1726	3015	3248	113832	7877	6025	7107	0	8938	18341	0	76618	79112	89416	3958	6303	8533	33575	329	357	932	982	6589	1175	9842	11536	2018
2015-02	physiology	137	1119		1726	3015	3248	113832	7877	6025	7107	0	8938	18341	0	76618	79112	89416	3958	6303	8533	33575	329	357	932	1119	6589	1175	9842	11536	2018
2015-02	plant biology	1012	7601		1726	3015	3248	113832	7877	6025	7107	0	8938	18341	0	76618	79112	89416	3958	6303	8533	33575	329	357	932	1119	7601	1175	9842	11536	2018
2015-02	scientific communication and education	79	1254		1726	3015	3248	113832	7877	6025	7107	0	8938	18341	0	76618	79112	89416	3958	6303	8533	33575	329	357	932	1119	7601	1254	9842	11536	2018
2015-02	synthetic biology	1084	10926		1726	3015	3248	113832	7877	6025	7107	0	8938	18341	0	76618	79112	89416	3958	6303	8533	33575	329	357	932	1119	7601	1254	10926	11536	2018
2015-02	systems biology	1900	13436		1726	3015	3248	113832	7877	6025	7107	0	8938	18341	0	76618	79112	89416	3958	6303	8533	33575	329	357	932	1119	7601	1254	10926	13436	2018
2015-02	zoology	178	2196		1726	3015	3248	113832	7877	6025	7107	0	8938	18341	0	76618	79112	89416	3958	6303	8533	33575	329	357	932	1119	7601	1254	10926	13436	2196
2015-03	animal behavior and cognition	306	2032		2032	3015	3248	113832	7877	6025	7107	0	8938	18341	0	76618	79112	89416	3958	6303	8533	33575	329	357	932	1119	7601	1254	10926	13436	2196
2015-03	biochemistry	293	3308		2032	3308	3248	113832	7877	6025	7107	0	8938	18341	0	76618	79112	89416	3958	6303	8533	33575	329	357	932	1119	7601	1254	10926	13436	2196
2015-03	bioengineering	443	3691		2032	3308	3691	113832	7877	6025	7107	0	8938	18341	0	76618	79112	89416	3958	6303	8533	33575	329	357	932	1119	7601	1254	10926	13436	2196
2015-03	bioinformatics	14056	127888		2032	3308	3691	127888	7877	6025	7107	0	8938	18341	0	76618	79112	89416	3958	6303	8533	33575	329	357	932	1119	7601	1254	10926	13436	2196
2015-03	biophysics	1121	8998		2032	3308	3691	127888	8998	6025	7107	0	8938	18341	0	76618	79112	89416	3958	6303	8533	33575	329	357	932	1119	7601	1254	10926	13436	2196
2015-03	cancer biology	1254	7279		2032	3308	3691	127888	8998	7279	7107	0	8938	18341	0	76618	79112	89416	3958	6303	8533	33575	329	357	932	1119	7601	1254	10926	13436	2196
2015-03	cell biology	664	7771		2032	3308	3691	127888	8998	7279	7771	0	8938	18341	0	76618	79112	89416	3958	6303	8533	33575	329	357	932	1119	7601	1254	10926	13436	2196
2015-03	developmental biology	2063	11001		2032	3308	3691	127888	8998	7279	7771	0	11001	18341	0	76618	79112	89416	3958	6303	8533	33575	329	357	932	1119	7601	1254	10926	13436	2196
2015-03	ecology	2033	20374		2032	3308	3691	127888	8998	7279	7771	0	11001	20374	0	76618	79112	89416	3958	6303	8533	33575	329	357	932	1119	7601	1254	10926	13436	2196
2015-03	evolutionary biology	11434	88052		2032	3308	3691	127888	8998	7279	7771	0	11001	20374	0	88052	79112	89416	3958	6303	8533	33575	329	357	932	1119	7601	1254	10926	13436	2196
2015-03	genetics	12829	91941		2032	3308	3691	127888	8998	7279	7771	0	11001	20374	0	88052	91941	89416	3958	6303	8533	33575	329	357	932	1119	7601	1254	10926	13436	2196
2015-03	genomics	10667	100083		2032	3308	3691	127888	8998	7279	7771	0	11001	20374	0	88052	91941	100083	3958	6303	8533	33575	329	357	932	1119	7601	1254	10926	13436	2196
2015-03	immunology	383	4341		2032	3308	3691	127888	8998	7279	7771	0	11001	20374	0	88052	91941	100083	4341	6303	8533	33575	329	357	932	1119	7601	1254	10926	13436	2196
2015-03	microbiology	908	7211		2032	3308	3691	127888	8998	7279	7771	0	11001	20374	0	88052	91941	100083	4341	7211	8533	33575	329	357	932	1119	7601	1254	10926	13436	2196
2015-03	molecular biology	785	9318		2032	3308	3691	127888	8998	7279	7771	0	11001	20374	0	88052	91941	100083	4341	7211	9318	33575	329	357	932	1119	7601	1254	10926	13436	2196
2015-03	neuroscience	6647	40222		2032	3308	3691	127888	8998	7279	7771	0	11001	20374	0	88052	91941	100083	4341	7211	9318	40222	329	357	932	1119	7601	1254	10926	13436	2196
2015-03	paleontology	105	434		2032	3308	3691	127888	8998	7279	7771	0	11001	20374	0	88052	91941	100083	4341	7211	9318	40222	434	357	932	1119	7601	1254	10926	13436	2196
2015-03	pathology	10	367		2032	3308	3691	127888	8998	7279	7771	0	11001	20374	0	88052	91941	100083	4341	7211	9318	40222	434	367	932	1119	7601	1254	10926	13436	2196
2015-03	pharmacology and toxicology	89	1021		2032	3308	3691	127888	8998	7279	7771	0	11001	20374	0	88052	91941	100083	4341	7211	9318	40222	434	367	1021	1119	7601	1254	10926	13436	2196
2015-03	physiology	175	1294		2032	3308	3691	127888	8998	7279	7771	0	11001	20374	0	88052	91941	100083	4341	7211	9318	40222	434	367	1021	1294	7601	1254	10926	13436	2196
2015-03	plant biology	1246	8847		2032	3308	3691	127888	8998	7279	7771	0	11001	20374	0	88052	91941	100083	4341	7211	9318	40222	434	367	1021	1294	8847	1254	10926	13436	2196
2015-03	scientific communication and education	147	1401		2032	3308	3691	127888	8998	7279	7771	0	11001	20374	0	88052	91941	100083	4341	7211	9318	40222	434	367	1021	1294	8847	1401	10926	13436	2196
2015-03	synthetic biology	2851	13777		2032	3308	3691	127888	8998	7279	7771	0	11001	20374	0	88052	91941	100083	4341	7211	9318	40222	434	367	1021	1294	8847	1401	13777	13436	2196
2015-03	systems biology	2027	15463		2032	3308	3691	127888	8998	7279	7771	0	11001	20374	0	88052	91941	100083	4341	7211	9318	40222	434	367	1021	1294	8847	1401	13777	15463	2196
2015-03	zoology	157	2353		2032	3308	3691	127888	8998	7279	7771	0	11001	20374	0	88052	91941	100083	4341	7211	9318	40222	434	367	1021	1294	8847	1401	13777	15463	2353
2015-04	animal behavior and cognition	383	2415		2415	3308	3691	127888	8998	7279	7771	0	11001	20374	0	88052	91941	100083	4341	7211	9318	40222	434	367	1021	1294	8847	1401	13777	15463	2353
2015-04	biochemistry	302	3610		2415	3610	3691	127888	8998	7279	7771	0	11001	20374	0	88052	91941	100083	4341	7211	9318	40222	434	367	1021	1294	8847	1401	13777	15463	2353
2015-04	bioengineering	330	4021		2415	3610	4021	127888	8998	7279	7771	0	11001	20374	0	88052	91941	100083	4341	7211	9318	40222	434	367	1021	1294	8847	1401	13777	15463	2353
2015-04	bioinformatics	14116	142004		2415	3610	4021	142004	8998	7279	7771	0	11001	20374	0	88052	91941	100083	4341	7211	9318	40222	434	367	1021	1294	8847	1401	13777	15463	2353
2015-04	biophysics	1247	10245		2415	3610	4021	142004	10245	7279	7771	0	11001	20374	0	88052	91941	100083	4341	7211	9318	40222	434	367	1021	1294	8847	1401	13777	15463	2353
2015-04	cancer biology	892	8171		2415	3610	4021	142004	10245	8171	7771	0	11001	20374	0	88052	91941	100083	4341	7211	9318	40222	434	367	1021	1294	8847	1401	13777	15463	2353
2015-04	cell biology	385	8156		2415	3610	4021	142004	10245	8171	8156	0	11001	20374	0	88052	91941	100083	4341	7211	9318	40222	434	367	1021	1294	8847	1401	13777	15463	2353
2015-04	developmental biology	1217	12218		2415	3610	4021	142004	10245	8171	8156	0	12218	20374	0	88052	91941	100083	4341	7211	9318	40222	434	367	1021	1294	8847	1401	13777	15463	2353
2015-04	ecology	2017	22391		2415	3610	4021	142004	10245	8171	8156	0	12218	22391	0	88052	91941	100083	4341	7211	9318	40222	434	367	1021	1294	8847	1401	13777	15463	2353
2015-04	evolutionary biology	10471	98523		2415	3610	4021	142004	10245	8171	8156	0	12218	22391	0	98523	91941	100083	4341	7211	9318	40222	434	367	1021	1294	8847	1401	13777	15463	2353
2015-04	genetics	17773	109714		2415	3610	4021	142004	10245	8171	8156	0	12218	22391	0	98523	109714	100083	4341	7211	9318	40222	434	367	1021	1294	8847	1401	13777	15463	2353
2015-04	genomics	11100	111183		2415	3610	4021	142004	10245	8171	8156	0	12218	22391	0	98523	109714	111183	4341	7211	9318	40222	434	367	1021	1294	8847	1401	13777	15463	2353
2015-04	immunology	412	4753		2415	3610	4021	142004	10245	8171	8156	0	12218	22391	0	98523	109714	111183	4753	7211	9318	40222	434	367	1021	1294	8847	1401	13777	15463	2353
2015-04	microbiology	891	8102		2415	3610	4021	142004	10245	8171	8156	0	12218	22391	0	98523	109714	111183	4753	8102	9318	40222	434	367	1021	1294	8847	1401	13777	15463	2353
2015-04	molecular biology	1158	10476		2415	3610	4021	142004	10245	8171	8156	0	12218	22391	0	98523	109714	111183	4753	8102	10476	40222	434	367	1021	1294	8847	1401	13777	15463	2353
2015-04	neuroscience	5422	45644		2415	3610	4021	142004	10245	8171	8156	0	12218	22391	0	98523	109714	111183	4753	8102	10476	45644	434	367	1021	1294	8847	1401	13777	15463	2353
2015-04	paleontology	79	513		2415	3610	4021	142004	10245	8171	8156	0	12218	22391	0	98523	109714	111183	4753	8102	10476	45644	513	367	1021	1294	8847	1401	13777	15463	2353
2015-04	pathology	37	404		2415	3610	4021	142004	10245	8171	8156	0	12218	22391	0	98523	109714	111183	4753	8102	10476	45644	513	404	1021	1294	8847	1401	13777	15463	2353
2015-04	pharmacology and toxicology	113	1134		2415	3610	4021	142004	10245	8171	8156	0	12218	22391	0	98523	109714	111183	4753	8102	10476	45644	513	404	1134	1294	8847	1401	13777	15463	2353
2015-04	physiology	214	1508		2415	3610	4021	142004	10245	8171	8156	0	12218	22391	0	98523	109714	111183	4753	8102	10476	45644	513	404	1134	1508	8847	1401	13777	15463	2353
2015-04	plant biology	1289	10136		2415	3610	4021	142004	10245	8171	8156	0	12218	22391	0	98523	109714	111183	4753	8102	10476	45644	513	404	1134	1508	10136	1401	13777	15463	2353
2015-04	scientific communication and education	81	1482		2415	3610	4021	142004	10245	8171	8156	0	12218	22391	0	98523	109714	111183	4753	8102	10476	45644	513	404	1134	1508	10136	1482	13777	15463	2353
2015-04	synthetic biology	1825	15602		2415	3610	4021	142004	10245	8171	8156	0	12218	22391	0	98523	109714	111183	4753	8102	10476	45644	513	404	1134	1508	10136	1482	15602	15463	2353
2015-04	systems biology	1704	17167		2415	3610	4021	142004	10245	8171	8156	0	12218	22391	0	98523	109714	111183	4753	8102	10476	45644	513	404	1134	1508	10136	1482	15602	17167	2353
2015-04	zoology	181	2534		2415	3610	4021	142004	10245	8171	8156	0	12218	22391	0	98523	109714	111183	4753	8102	10476	45644	513	404	1134	1508	10136	1482	15602	17167	2534
2015-05	animal behavior and cognition	367	2782		2782	3610	4021	142004	10245	8171	8156	0	12218	22391	0	98523	109714	111183	4753	8102	10476	45644	513	404	1134	1508	10136	1482	15602	17167	2534
2015-05	biochemistry	347	3957		2782	3957	4021	142004	10245	8171	8156	0	12218	22391	0	98523	109714	111183	4753	8102	10476	45644	513	404	1134	1508	10136	1482	15602	17167	2534
2015-05	bioengineering	618	4639		2782	3957	4639	142004	10245	8171	8156	0	12218	22391	0	98523	109714	111183	4753	8102	10476	45644	513	404	1134	1508	10136	1482	15602	17167	2534
2015-05	bioinformatics	15034	157038		2782	3957	4639	157038	10245	8171	8156	0	12218	22391	0	98523	109714	111183	4753	8102	10476	45644	513	404	1134	1508	10136	1482	15602	17167	2534
2015-05	biophysics	1038	11283		2782	3957	4639	157038	11283	8171	8156	0	12218	22391	0	98523	109714	111183	4753	8102	10476	45644	513	404	1134	1508	10136	1482	15602	17167	2534
2015-05	cancer biology	881	9052		2782	3957	4639	157038	11283	9052	8156	0	12218	22391	0	98523	109714	111183	4753	8102	10476	45644	513	404	1134	1508	10136	1482	15602	17167	2534
2015-05	cell biology	463	8619		2782	3957	4639	157038	11283	9052	8619	0	12218	22391	0	98523	109714	111183	4753	8102	10476	45644	513	404	1134	1508	10136	1482	15602	17167	2534
2015-05	developmental biology	1104	13322		2782	3957	4639	157038	11283	9052	8619	0	13322	22391	0	98523	109714	111183	4753	8102	10476	45644	513	404	1134	1508	10136	1482	15602	17167	2534
2015-05	ecology	2343	24734		2782	3957	4639	157038	11283	9052	8619	0	13322	24734	0	98523	109714	111183	4753	8102	10476	45644	513	404	1134	1508	10136	1482	15602	17167	2534
2015-05	evolutionary biology	12107	110630		2782	3957	4639	157038	11283	9052	8619	0	13322	24734	0	110630	109714	111183	4753	8102	10476	45644	513	404	1134	1508	10136	1482	15602	17167	2534
2015-05	genetics	10408	120122		2782	3957	4639	157038	11283	9052	8619	0	13322	24734	0	110630	120122	111183	4753	8102	10476	45644	513	404	1134	1508	10136	1482	15602	17167	2534
2015-05	genomics	17628	128811		2782	3957	4639	157038	11283	9052	8619	0	13322	24734	0	110630	120122	128811	4753	8102	10476	45644	513	404	1134	1508	10136	1482	15602	17167	2534
2015-05	immunology	357	5110		2782	3957	4639	157038	11283	9052	8619	0	13322	24734	0	110630	120122	128811	5110	8102	10476	45644	513	404	1134	1508	10136	1482	15602	17167	2534
2015-05	microbiology	1275	9377		2782	3957	4639	157038	11283	9052	8619	0	13322	24734	0	110630	120122	128811	5110	9377	10476	45644	513	404	1134	1508	10136	1482	15602	17167	2534
2015-05	molecular biology	805	11281		2782	3957	4639	157038	11283	9052	8619	0	13322	24734	0	110630	120122	128811	5110	9377	11281	45644	513	404	1134	1508	10136	1482	15602	17167	2534
2015-05	neuroscience	4211	49855		2782	3957	4639	157038	11283	9052	8619	0	13322	24734	0	110630	120122	128811	5110	9377	11281	49855	513	404	1134	1508	10136	1482	15602	17167	2534
2015-05	paleontology	89	602		2782	3957	4639	157038	11283	9052	8619	0	13322	24734	0	110630	120122	128811	5110	9377	11281	49855	602	404	1134	1508	10136	1482	15602	17167	2534
2015-05	pathology	62	466		2782	3957	4639	157038	11283	9052	8619	0	13322	24734	0	110630	120122	128811	5110	9377	11281	49855	602	466	1134	1508	10136	1482	15602	17167	2534
2015-05	pharmacology and toxicology	106	1240		2782	3957	4639	157038	11283	9052	8619	0	13322	24734	0	110630	120122	128811	5110	9377	11281	49855	602	466	1240	1508	10136	1482	15602	17167	2534
2015-05	physiology	162	1670		2782	3957	4639	157038	11283	9052	8619	0	13322	24734	0	110630	120122	128811	5110	9377	11281	49855	602	466	1240	1670	10136	1482	15602	17167	2534
2015-05	plant biology	1514	11650		2782	3957	4639	157038	11283	9052	8619	0	13322	24734	0	110630	120122	128811	5110	9377	11281	49855	602	466	1240	1670	11650	1482	15602	17167	2534
2015-05	scientific communication and education	164	1646		2782	3957	4639	157038	11283	9052	8619	0	13322	24734	0	110630	120122	128811	5110	9377	11281	49855	602	466	1240	1670	11650	1646	15602	17167	2534
2015-05	synthetic biology	1989	17591		2782	3957	4639	157038	11283	9052	8619	0	13322	24734	0	110630	120122	128811	5110	9377	11281	49855	602	466	1240	1670	11650	1646	17591	17167	2534
2015-05	systems biology	2181	19348		2782	3957	4639	157038	11283	9052	8619	0	13322	24734	0	110630	120122	128811	5110	9377	11281	49855	602	466	1240	1670	11650	1646	17591	19348	2534
2015-05	zoology	210	2744		2782	3957	4639	157038	11283	9052	8619	0	13322	24734	0	110630	120122	128811	5110	9377	11281	49855	602	466	1240	1670	11650	1646	17591	19348	2744
2015-06	animal behavior and cognition	374	3156		3156	3957	4639	157038	11283	9052	8619	0	13322	24734	0	110630	120122	128811	5110	9377	11281	49855	602	466	1240	1670	11650	1646	17591	19348	2744
2015-06	biochemistry	214	4171		3156	4171	4639	157038	11283	9052	8619	0	13322	24734	0	110630	120122	128811	5110	9377	11281	49855	602	466	1240	1670	11650	1646	17591	19348	2744
2015-06	bioengineering	376	5015		3156	4171	5015	157038	11283	9052	8619	0	13322	24734	0	110630	120122	128811	5110	9377	11281	49855	602	466	1240	1670	11650	1646	17591	19348	2744
2015-06	bioinformatics	20009	177047		3156	4171	5015	177047	11283	9052	8619	0	13322	24734	0	110630	120122	128811	5110	9377	11281	49855	602	466	1240	1670	11650	1646	17591	19348	2744
2015-06	biophysics	809	12092		3156	4171	5015	177047	12092	9052	8619	0	13322	24734	0	110630	120122	128811	5110	9377	11281	49855	602	466	1240	1670	11650	1646	17591	19348	2744
2015-06	cancer biology	994	10046		3156	4171	5015	177047	12092	10046	8619	0	13322	24734	0	110630	120122	128811	5110	9377	11281	49855	602	466	1240	1670	11650	1646	17591	19348	2744
2015-06	cell biology	680	9299		3156	4171	5015	177047	12092	10046	9299	0	13322	24734	0	110630	120122	128811	5110	9377	11281	49855	602	466	1240	1670	11650	1646	17591	19348	2744
2015-06	developmental biology	1070	14392		3156	4171	5015	177047	12092	10046	9299	0	14392	24734	0	110630	120122	128811	5110	9377	11281	49855	602	466	1240	1670	11650	1646	17591	19348	2744
2015-06	ecology	2059	26793		3156	4171	5015	177047	12092	10046	9299	0	14392	26793	0	110630	120122	128811	5110	9377	11281	49855	602	466	1240	1670	11650	1646	17591	19348	2744
2015-06	evolutionary biology	10726	121356		3156	4171	5015	177047	12092	10046	9299	0	14392	26793	0	121356	120122	128811	5110	9377	11281	49855	602	466	1240	1670	11650	1646	17591	19348	2744
2015-06	genetics	8914	129036		3156	4171	5015	177047	12092	10046	9299	0	14392	26793	0	121356	129036	128811	5110	9377	11281	49855	602	466	1240	1670	11650	1646	17591	19348	2744
2015-06	genomics	16102	144913		3156	4171	5015	177047	12092	10046	9299	0	14392	26793	0	121356	129036	144913	5110	9377	11281	49855	602	466	1240	1670	11650	1646	17591	19348	2744
2015-06	immunology	293	5403		3156	4171	5015	177047	12092	10046	9299	0	14392	26793	0	121356	129036	144913	5403	9377	11281	49855	602	466	1240	1670	11650	1646	17591	19348	2744
2015-06	microbiology	1415	10792		3156	4171	5015	177047	12092	10046	9299	0	14392	26793	0	121356	129036	144913	5403	10792	11281	49855	602	466	1240	1670	11650	1646	17591	19348	2744
2015-06	molecular biology	993	12274		3156	4171	5015	177047	12092	10046	9299	0	14392	26793	0	121356	129036	144913	5403	10792	12274	49855	602	466	1240	1670	11650	1646	17591	19348	2744
2015-06	neuroscience	4903	54758		3156	4171	5015	177047	12092	10046	9299	0	14392	26793	0	121356	129036	144913	5403	10792	12274	54758	602	466	1240	1670	11650	1646	17591	19348	2744
2015-06	paleontology	54	656		3156	4171	5015	177047	12092	10046	9299	0	14392	26793	0	121356	129036	144913	5403	10792	12274	54758	656	466	1240	1670	11650	1646	17591	19348	2744
2015-06	pathology	87	553		3156	4171	5015	177047	12092	10046	9299	0	14392	26793	0	121356	129036	144913	5403	10792	12274	54758	656	553	1240	1670	11650	1646	17591	19348	2744
2015-06	pharmacology and toxicology	657	1897		3156	4171	5015	177047	12092	10046	9299	0	14392	26793	0	121356	129036	144913	5403	10792	12274	54758	656	553	1897	1670	11650	1646	17591	19348	2744
2015-06	physiology	172	1842		3156	4171	5015	177047	12092	10046	9299	0	14392	26793	0	121356	129036	144913	5403	10792	12274	54758	656	553	1897	1842	11650	1646	17591	19348	2744
2015-06	plant biology	1222	12872		3156	4171	5015	177047	12092	10046	9299	0	14392	26793	0	121356	129036	144913	5403	10792	12274	54758	656	553	1897	1842	12872	1646	17591	19348	2744
2015-06	scientific communication and education	158	1804		3156	4171	5015	177047	12092	10046	9299	0	14392	26793	0	121356	129036	144913	5403	10792	12274	54758	656	553	1897	1842	12872	1804	17591	19348	2744
2015-06	synthetic biology	1716	19307		3156	4171	5015	177047	12092	10046	9299	0	14392	26793	0	121356	129036	144913	5403	10792	12274	54758	656	553	1897	1842	12872	1804	19307	19348	2744
2015-06	systems biology	1607	20955		3156	4171	5015	177047	12092	10046	9299	0	14392	26793	0	121356	129036	144913	5403	10792	12274	54758	656	553	1897	1842	12872	1804	19307	20955	2744
2015-06	zoology	146	2890		3156	4171	5015	177047	12092	10046	9299	0	14392	26793	0	121356	129036	144913	5403	10792	12274	54758	656	553	1897	1842	12872	1804	19307	20955	2890
2015-07	animal behavior and cognition	617	3773		3773	4171	5015	177047	12092	10046	9299	0	14392	26793	0	121356	129036	144913	5403	10792	12274	54758	656	553	1897	1842	12872	1804	19307	20955	2890
2015-07	biochemistry	319	4490		3773	4490	5015	177047	12092	10046	9299	0	14392	26793	0	121356	129036	144913	5403	10792	12274	54758	656	553	1897	1842	12872	1804	19307	20955	2890
2015-07	bioengineering	892	5907		3773	4490	5907	177047	12092	10046	9299	0	14392	26793	0	121356	129036	144913	5403	10792	12274	54758	656	553	1897	1842	12872	1804	19307	20955	2890
2015-07	bioinformatics	15456	192503		3773	4490	5907	192503	12092	10046	9299	0	14392	26793	0	121356	129036	144913	5403	10792	12274	54758	656	553	1897	1842	12872	1804	19307	20955	2890
2015-07	biophysics	1234	13326		3773	4490	5907	192503	13326	10046	9299	0	14392	26793	0	121356	129036	144913	5403	10792	12274	54758	656	553	1897	1842	12872	1804	19307	20955	2890
2015-07	cancer biology	1255	11301		3773	4490	5907	192503	13326	11301	9299	0	14392	26793	0	121356	129036	144913	5403	10792	12274	54758	656	553	1897	1842	12872	1804	19307	20955	2890
2015-07	cell biology	518	9817		3773	4490	5907	192503	13326	11301	9817	0	14392	26793	0	121356	129036	144913	5403	10792	12274	54758	656	553	1897	1842	12872	1804	19307	20955	2890
2015-07	developmental biology	1481	15873		3773	4490	5907	192503	13326	11301	9817	0	15873	26793	0	121356	129036	144913	5403	10792	12274	54758	656	553	1897	1842	12872	1804	19307	20955	2890
2015-07	ecology	1823	28616		3773	4490	5907	192503	13326	11301	9817	0	15873	28616	0	121356	129036	144913	5403	10792	12274	54758	656	553	1897	1842	12872	1804	19307	20955	2890
2015-07	evolutionary biology	12601	133957		3773	4490	5907	192503	13326	11301	9817	0	15873	28616	0	133957	129036	144913	5403	10792	12274	54758	656	553	1897	1842	12872	1804	19307	20955	2890
2015-07	genetics	14472	143508		3773	4490	5907	192503	13326	11301	9817	0	15873	28616	0	133957	143508	144913	5403	10792	12274	54758	656	553	1897	1842	12872	1804	19307	20955	2890
2015-07	genomics	14146	159059		3773	4490	5907	192503	13326	11301	9817	0	15873	28616	0	133957	143508	159059	5403	10792	12274	54758	656	553	1897	1842	12872	1804	19307	20955	2890
2015-07	immunology	341	5744		3773	4490	5907	192503	13326	11301	9817	0	15873	28616	0	133957	143508	159059	5744	10792	12274	54758	656	553	1897	1842	12872	1804	19307	20955	2890
2015-07	microbiology	1730	12522		3773	4490	5907	192503	13326	11301	9817	0	15873	28616	0	133957	143508	159059	5744	12522	12274	54758	656	553	1897	1842	12872	1804	19307	20955	2890
2015-07	molecular biology	849	13123		3773	4490	5907	192503	13326	11301	9817	0	15873	28616	0	133957	143508	159059	5744	12522	13123	54758	656	553	1897	1842	12872	1804	19307	20955	2890
2015-07	neuroscience	7036	61794		3773	4490	5907	192503	13326	11301	9817	0	15873	28616	0	133957	143508	159059	5744	12522	13123	61794	656	553	1897	1842	12872	1804	19307	20955	2890
2015-07	paleontology	33	689		3773	4490	5907	192503	13326	11301	9817	0	15873	28616	0	133957	143508	159059	5744	12522	13123	61794	689	553	1897	1842	12872	1804	19307	20955	2890
2015-07	pathology	61	614		3773	4490	5907	192503	13326	11301	9817	0	15873	28616	0	133957	143508	159059	5744	12522	13123	61794	689	614	1897	1842	12872	1804	19307	20955	2890
2015-07	pharmacology and toxicology	205	2102		3773	4490	5907	192503	13326	11301	9817	0	15873	28616	0	133957	143508	159059	5744	12522	13123	61794	689	614	2102	1842	12872	1804	19307	20955	2890
2015-07	physiology	144	1986		3773	4490	5907	192503	13326	11301	9817	0	15873	28616	0	133957	143508	159059	5744	12522	13123	61794	689	614	2102	1986	12872	1804	19307	20955	2890
2015-07	plant biology	1299	14171		3773	4490	5907	192503	13326	11301	9817	0	15873	28616	0	133957	143508	159059	5744	12522	13123	61794	689	614	2102	1986	14171	1804	19307	20955	2890
2015-07	scientific communication and education	6125	7929		3773	4490	5907	192503	13326	11301	9817	0	15873	28616	0	133957	143508	159059	5744	12522	13123	61794	689	614	2102	1986	14171	7929	19307	20955	2890
2015-07	synthetic biology	1169	20476		3773	4490	5907	192503	13326	11301	9817	0	15873	28616	0	133957	143508	159059	5744	12522	13123	61794	689	614	2102	1986	14171	7929	20476	20955	2890
2015-07	systems biology	1619	22574		3773	4490	5907	192503	13326	11301	9817	0	15873	28616	0	133957	143508	159059	5744	12522	13123	61794	689	614	2102	1986	14171	7929	20476	22574	2890
2015-07	zoology	180	3070		3773	4490	5907	192503	13326	11301	9817	0	15873	28616	0	133957	143508	159059	5744	12522	13123	61794	689	614	2102	1986	14171	7929	20476	22574	3070
2015-08	animal behavior and cognition	458	4231		4231	4490	5907	192503	13326	11301	9817	0	15873	28616	0	133957	143508	159059	5744	12522	13123	61794	689	614	2102	1986	14171	7929	20476	22574	3070
2015-08	biochemistry	399	4889		4231	4889	5907	192503	13326	11301	9817	0	15873	28616	0	133957	143508	159059	5744	12522	13123	61794	689	614	2102	1986	14171	7929	20476	22574	3070
2015-08	bioengineering	892	6799		4231	4889	6799	192503	13326	11301	9817	0	15873	28616	0	133957	143508	159059	5744	12522	13123	61794	689	614	2102	1986	14171	7929	20476	22574	3070
2015-08	bioinformatics	15686	208189		4231	4889	6799	208189	13326	11301	9817	0	15873	28616	0	133957	143508	159059	5744	12522	13123	61794	689	614	2102	1986	14171	7929	20476	22574	3070
2015-08	biophysics	1084	14410		4231	4889	6799	208189	14410	11301	9817	0	15873	28616	0	133957	143508	159059	5744	12522	13123	61794	689	614	2102	1986	14171	7929	20476	22574	3070
2015-08	cancer biology	1276	12577		4231	4889	6799	208189	14410	12577	9817	0	15873	28616	0	133957	143508	159059	5744	12522	13123	61794	689	614	2102	1986	14171	7929	20476	22574	3070
2015-08	cell biology	506	10323		4231	4889	6799	208189	14410	12577	10323	0	15873	28616	0	133957	143508	159059	5744	12522	13123	61794	689	614	2102	1986	14171	7929	20476	22574	3070
2015-08	developmental biology	1007	16880		4231	4889	6799	208189	14410	12577	10323	0	16880	28616	0	133957	143508	159059	5744	12522	13123	61794	689	614	2102	1986	14171	7929	20476	22574	3070
2015-08	ecology	2727	31343		4231	4889	6799	208189	14410	12577	10323	0	16880	31343	0	133957	143508	159059	5744	12522	13123	61794	689	614	2102	1986	14171	7929	20476	22574	3070
2015-08	evolutionary biology	11117	145074		4231	4889	6799	208189	14410	12577	10323	0	16880	31343	0	145074	143508	159059	5744	12522	13123	61794	689	614	2102	1986	14171	7929	20476	22574	3070
2015-08	genetics	10171	153679		4231	4889	6799	208189	14410	12577	10323	0	16880	31343	0	145074	153679	159059	5744	12522	13123	61794	689	614	2102	1986	14171	7929	20476	22574	3070
2015-08	genomics	16610	175669		4231	4889	6799	208189	14410	12577	10323	0	16880	31343	0	145074	153679	175669	5744	12522	13123	61794	689	614	2102	1986	14171	7929	20476	22574	3070
2015-08	immunology	332	6076		4231	4889	6799	208189	14410	12577	10323	0	16880	31343	0	145074	153679	175669	6076	12522	13123	61794	689	614	2102	1986	14171	7929	20476	22574	3070
2015-08	microbiology	1448	13970		4231	4889	6799	208189	14410	12577	10323	0	16880	31343	0	145074	153679	175669	6076	13970	13123	61794	689	614	2102	1986	14171	7929	20476	22574	3070
2015-08	molecular biology	1012	14135		4231	4889	6799	208189	14410	12577	10323	0	16880	31343	0	145074	153679	175669	6076	13970	14135	61794	689	614	2102	1986	14171	7929	20476	22574	3070
2015-08	neuroscience	4675	66469		4231	4889	6799	208189	14410	12577	10323	0	16880	31343	0	145074	153679	175669	6076	13970	14135	66469	689	614	2102	1986	14171	7929	20476	22574	3070
2015-08	paleontology	41	730		4231	4889	6799	208189	14410	12577	10323	0	16880	31343	0	145074	153679	175669	6076	13970	14135	66469	730	614	2102	1986	14171	7929	20476	22574	3070
2015-08	pathology	26	640		4231	4889	6799	208189	14410	12577	10323	0	16880	31343	0	145074	153679	175669	6076	13970	14135	66469	730	640	2102	1986	14171	7929	20476	22574	3070
2015-08	pharmacology and toxicology	142	2244		4231	4889	6799	208189	14410	12577	10323	0	16880	31343	0	145074	153679	175669	6076	13970	14135	66469	730	640	2244	1986	14171	7929	20476	22574	3070
2015-08	physiology	98	2084		4231	4889	6799	208189	14410	12577	10323	0	16880	31343	0	145074	153679	175669	6076	13970	14135	66469	730	640	2244	2084	14171	7929	20476	22574	3070
2015-08	plant biology	1430	15601		4231	4889	6799	208189	14410	12577	10323	0	16880	31343	0	145074	153679	175669	6076	13970	14135	66469	730	640	2244	2084	15601	7929	20476	22574	3070
2015-08	scientific communication and education	1494	9423		4231	4889	6799	208189	14410	12577	10323	0	16880	31343	0	145074	153679	175669	6076	13970	14135	66469	730	640	2244	2084	15601	9423	20476	22574	3070
2015-08	synthetic biology	1973	22449		4231	4889	6799	208189	14410	12577	10323	0	16880	31343	0	145074	153679	175669	6076	13970	14135	66469	730	640	2244	2084	15601	9423	22449	22574	3070
2015-08	systems biology	1408	23982		4231	4889	6799	208189	14410	12577	10323	0	16880	31343	0	145074	153679	175669	6076	13970	14135	66469	730	640	2244	2084	15601	9423	22449	23982	3070
2015-08	zoology	1594	4664		4231	4889	6799	208189	14410	12577	10323	0	16880	31343	0	145074	153679	175669	6076	13970	14135	66469	730	640	2244	2084	15601	9423	22449	23982	4664
2015-09	animal behavior and cognition	692	4923		4923	4889	6799	208189	14410	12577	10323	0	16880	31343	0	145074	153679	175669	6076	13970	14135	66469	730	640	2244	2084	15601	9423	22449	23982	4664
2015-09	biochemistry	540	5429		4923	5429	6799	208189	14410	12577	10323	0	16880	31343	0	145074	153679	175669	6076	13970	14135	66469	730	640	2244	2084	15601	9423	22449	23982	4664
2015-09	bioengineering	1024	7823		4923	5429	7823	208189	14410	12577	10323	0	16880	31343	0	145074	153679	175669	6076	13970	14135	66469	730	640	2244	2084	15601	9423	22449	23982	4664
2015-09	bioinformatics	18013	226202		4923	5429	7823	226202	14410	12577	10323	0	16880	31343	0	145074	153679	175669	6076	13970	14135	66469	730	640	2244	2084	15601	9423	22449	23982	4664
2015-09	biophysics	1246	15656		4923	5429	7823	226202	15656	12577	10323	0	16880	31343	0	145074	153679	175669	6076	13970	14135	66469	730	640	2244	2084	15601	9423	22449	23982	4664
2015-09	cancer biology	2096	14673		4923	5429	7823	226202	15656	14673	10323	0	16880	31343	0	145074	153679	175669	6076	13970	14135	66469	730	640	2244	2084	15601	9423	22449	23982	4664
2015-09	cell biology	553	10876		4923	5429	7823	226202	15656	14673	10876	0	16880	31343	0	145074	153679	175669	6076	13970	14135	66469	730	640	2244	2084	15601	9423	22449	23982	4664
2015-09	developmental biology	1137	18017		4923	5429	7823	226202	15656	14673	10876	0	18017	31343	0	145074	153679	175669	6076	13970	14135	66469	730	640	2244	2084	15601	9423	22449	23982	4664
2015-09	ecology	3139	34482		4923	5429	7823	226202	15656	14673	10876	0	18017	34482	0	145074	153679	175669	6076	13970	14135	66469	730	640	2244	2084	15601	9423	22449	23982	4664
2015-09	evolutionary biology	12910	157984		4923	5429	7823	226202	15656	14673	10876	0	18017	34482	0	157984	153679	175669	6076	13970	14135	66469	730	640	2244	2084	15601	9423	22449	23982	4664
2015-09	genetics	9458	163137		4923	5429	7823	226202	15656	14673	10876	0	18017	34482	0	157984	163137	175669	6076	13970	14135	66469	730	640	2244	2084	15601	9423	22449	23982	4664
2015-09	genomics	15851	191520		4923	5429	7823	226202	15656	14673	10876	0	18017	34482	0	157984	163137	191520	6076	13970	14135	66469	730	640	2244	2084	15601	9423	22449	23982	4664
2015-09	immunology	489	6565		4923	5429	7823	226202	15656	14673	10876	0	18017	34482	0	157984	163137	191520	6565	13970	14135	66469	730	640	2244	2084	15601	9423	22449	23982	4664
2015-09	microbiology	2235	16205		4923	5429	7823	226202	15656	14673	10876	0	18017	34482	0	157984	163137	191520	6565	16205	14135	66469	730	640	2244	2084	15601	9423	22449	23982	4664
2015-09	molecular biology	1823	15958		4923	5429	7823	226202	15656	14673	10876	0	18017	34482	0	157984	163137	191520	6565	16205	15958	66469	730	640	2244	2084	15601	9423	22449	23982	4664
2015-09	neuroscience	5209	71678		4923	5429	7823	226202	15656	14673	10876	0	18017	34482	0	157984	163137	191520	6565	16205	15958	71678	730	640	2244	2084	15601	9423	22449	23982	4664
2015-09	paleontology	315	1045		4923	5429	7823	226202	15656	14673	10876	0	18017	34482	0	157984	163137	191520	6565	16205	15958	71678	1045	640	2244	2084	15601	9423	22449	23982	4664
2015-09	pathology	34	674		4923	5429	7823	226202	15656	14673	10876	0	18017	34482	0	157984	163137	191520	6565	16205	15958	71678	1045	674	2244	2084	15601	9423	22449	23982	4664
2015-09	pharmacology and toxicology	171	2415		4923	5429	7823	226202	15656	14673	10876	0	18017	34482	0	157984	163137	191520	6565	16205	15958	71678	1045	674	2415	2084	15601	9423	22449	23982	4664
2015-09	physiology	182	2266		4923	5429	7823	226202	15656	14673	10876	0	18017	34482	0	157984	163137	191520	6565	16205	15958	71678	1045	674	2415	2266	15601	9423	22449	23982	4664
2015-09	plant biology	1166	16767		4923	5429	7823	226202	15656	14673	10876	0	18017	34482	0	157984	163137	191520	6565	16205	15958	71678	1045	674	2415	2266	16767	9423	22449	23982	4664
2015-09	scientific communication and education	835	10258		4923	5429	7823	226202	15656	14673	10876	0	18017	34482	0	157984	163137	191520	6565	16205	15958	71678	1045	674	2415	2266	16767	10258	22449	23982	4664
2015-09	synthetic biology	1596	24045		4923	5429	7823	226202	15656	14673	10876	0	18017	34482	0	157984	163137	191520	6565	16205	15958	71678	1045	674	2415	2266	16767	10258	24045	23982	4664
2015-09	systems biology	2000	25982		4923	5429	7823	226202	15656	14673	10876	0	18017	34482	0	157984	163137	191520	6565	16205	15958	71678	1045	674	2415	2266	16767	10258	24045	25982	4664
2015-09	zoology	543	5207		4923	5429	7823	226202	15656	14673	10876	0	18017	34482	0	157984	163137	191520	6565	16205	15958	71678	1045	674	2415	2266	16767	10258	24045	25982	5207
2015-10	animal behavior and cognition	1035	5958		5958	5429	7823	226202	15656	14673	10876	0	18017	34482	0	157984	163137	191520	6565	16205	15958	71678	1045	674	2415	2266	16767	10258	24045	25982	5207
2015-10	biochemistry	631	6060		5958	6060	7823	226202	15656	14673	10876	0	18017	34482	0	157984	163137	191520	6565	16205	15958	71678	1045	674	2415	2266	16767	10258	24045	25982	5207
2015-10	bioengineering	886	8709		5958	6060	8709	226202	15656	14673	10876	0	18017	34482	0	157984	163137	191520	6565	16205	15958	71678	1045	674	2415	2266	16767	10258	24045	25982	5207
2015-10	bioinformatics	19664	245866		5958	6060	8709	245866	15656	14673	10876	0	18017	34482	0	157984	163137	191520	6565	16205	15958	71678	1045	674	2415	2266	16767	10258	24045	25982	5207
2015-10	biophysics	1499	17155		5958	6060	8709	245866	17155	14673	10876	0	18017	34482	0	157984	163137	191520	6565	16205	15958	71678	1045	674	2415	2266	16767	10258	24045	25982	5207
2015-10	cancer biology	2061	16734		5958	6060	8709	245866	17155	16734	10876	0	18017	34482	0	157984	163137	191520	6565	16205	15958	71678	1045	674	2415	2266	16767	10258	24045	25982	5207
2015-10	cell biology	1670	12546		5958	6060	8709	245866	17155	16734	12546	0	18017	34482	0	157984	163137	191520	6565	16205	15958	71678	1045	674	2415	2266	16767	10258	24045	25982	5207
2015-10	clinical trials	52	52		5958	6060	8709	245866	17155	16734	12546	52	18017	34482	0	157984	163137	191520	6565	16205	15958	71678	1045	674	2415	2266	16767	10258	24045	25982	5207
2015-10	developmental biology	1361	19378		5958	6060	8709	245866	17155	16734	12546	52	19378	34482	0	157984	163137	191520	6565	16205	15958	71678	1045	674	2415	2266	16767	10258	24045	25982	5207
2015-10	ecology	3183	37665		5958	6060	8709	245866	17155	16734	12546	52	19378	37665	0	157984	163137	191520	6565	16205	15958	71678	1045	674	2415	2266	16767	10258	24045	25982	5207
2015-10	evolutionary biology	14993	172977		5958	6060	8709	245866	17155	16734	12546	52	19378	37665	0	172977	163137	191520	6565	16205	15958	71678	1045	674	2415	2266	16767	10258	24045	25982	5207
2015-10	genetics	17721	180858		5958	6060	8709	245866	17155	16734	12546	52	19378	37665	0	172977	180858	191520	6565	16205	15958	71678	1045	674	2415	2266	16767	10258	24045	25982	5207
2015-10	genomics	20760	212280		5958	6060	8709	245866	17155	16734	12546	52	19378	37665	0	172977	180858	212280	6565	16205	15958	71678	1045	674	2415	2266	16767	10258	24045	25982	5207
2015-10	immunology	364	6929		5958	6060	8709	245866	17155	16734	12546	52	19378	37665	0	172977	180858	212280	6929	16205	15958	71678	1045	674	2415	2266	16767	10258	24045	25982	5207
2015-10	microbiology	1908	18113		5958	6060	8709	245866	17155	16734	12546	52	19378	37665	0	172977	180858	212280	6929	18113	15958	71678	1045	674	2415	2266	16767	10258	24045	25982	5207
2015-10	molecular biology	1183	17141		5958	6060	8709	245866	17155	16734	12546	52	19378	37665	0	172977	180858	212280	6929	18113	17141	71678	1045	674	2415	2266	16767	10258	24045	25982	5207
2015-10	neuroscience	7724	79402		5958	6060	8709	245866	17155	16734	12546	52	19378	37665	0	172977	180858	212280	6929	18113	17141	79402	1045	674	2415	2266	16767	10258	24045	25982	5207
2015-10	paleontology	141	1186		5958	6060	8709	245866	17155	16734	12546	52	19378	37665	0	172977	180858	212280	6929	18113	17141	79402	1186	674	2415	2266	16767	10258	24045	25982	5207
2015-10	pathology	69	743		5958	6060	8709	245866	17155	16734	12546	52	19378	37665	0	172977	180858	212280	6929	18113	17141	79402	1186	743	2415	2266	16767	10258	24045	25982	5207
2015-10	pharmacology and toxicology	154	2569		5958	6060	8709	245866	17155	16734	12546	52	19378	37665	0	172977	180858	212280	6929	18113	17141	79402	1186	743	2569	2266	16767	10258	24045	25982	5207
2015-10	physiology	272	2538		5958	6060	8709	245866	17155	16734	12546	52	19378	37665	0	172977	180858	212280	6929	18113	17141	79402	1186	743	2569	2538	16767	10258	24045	25982	5207
2015-10	plant biology	1173	17940		5958	6060	8709	245866	17155	16734	12546	52	19378	37665	0	172977	180858	212280	6929	18113	17141	79402	1186	743	2569	2538	17940	10258	24045	25982	5207
2015-10	scientific communication and education	2209	12467		5958	6060	8709	245866	17155	16734	12546	52	19378	37665	0	172977	180858	212280	6929	18113	17141	79402	1186	743	2569	2538	17940	12467	24045	25982	5207
2015-10	synthetic biology	1451	25496		5958	6060	8709	245866	17155	16734	12546	52	19378	37665	0	172977	180858	212280	6929	18113	17141	79402	1186	743	2569	2538	17940	12467	25496	25982	5207
2015-10	systems biology	2359	28341		5958	6060	8709	245866	17155	16734	12546	52	19378	37665	0	172977	180858	212280	6929	18113	17141	79402	1186	743	2569	2538	17940	12467	25496	28341	5207
2015-10	zoology	404	5611		5958	6060	8709	245866	17155	16734	12546	52	19378	37665	0	172977	180858	212280	6929	18113	17141	79402	1186	743	2569	2538	17940	12467	25496	28341	5611
2015-11	animal behavior and cognition	672	6630		6630	6060	8709	245866	17155	16734	12546	52	19378	37665	0	172977	180858	212280	6929	18113	17141	79402	1186	743	2569	2538	17940	12467	25496	28341	5611
2015-11	biochemistry	553	6613		6630	6613	8709	245866	17155	16734	12546	52	19378	37665	0	172977	180858	212280	6929	18113	17141	79402	1186	743	2569	2538	17940	12467	25496	28341	5611
2015-11	bioengineering	964	9673		6630	6613	9673	245866	17155	16734	12546	52	19378	37665	0	172977	180858	212280	6929	18113	17141	79402	1186	743	2569	2538	17940	12467	25496	28341	5611
2015-11	bioinformatics	20834	266700		6630	6613	9673	266700	17155	16734	12546	52	19378	37665	0	172977	180858	212280	6929	18113	17141	79402	1186	743	2569	2538	17940	12467	25496	28341	5611
2015-11	biophysics	1557	18712		6630	6613	9673	266700	18712	16734	12546	52	19378	37665	0	172977	180858	212280	6929	18113	17141	79402	1186	743	2569	2538	17940	12467	25496	28341	5611
2015-11	cancer biology	2006	18740		6630	6613	9673	266700	18712	18740	12546	52	19378	37665	0	172977	180858	212280	6929	18113	17141	79402	1186	743	2569	2538	17940	12467	25496	28341	5611
2015-11	cell biology	1839	14385		6630	6613	9673	266700	18712	18740	14385	52	19378	37665	0	172977	180858	212280	6929	18113	17141	79402	1186	743	2569	2538	17940	12467	25496	28341	5611
2015-11	clinical trials	41	93		6630	6613	9673	266700	18712	18740	14385	93	19378	37665	0	172977	180858	212280	6929	18113	17141	79402	1186	743	2569	2538	17940	12467	25496	28341	5611
2015-11	developmental biology	1601	20979		6630	6613	9673	266700	18712	18740	14385	93	20979	37665	0	172977	180858	212280	6929	18113	17141	79402	1186	743	2569	2538	17940	12467	25496	28341	5611
2015-11	ecology	3371	41036		6630	6613	9673	266700	18712	18740	14385	93	20979	41036	0	172977	180858	212280	6929	18113	17141	79402	1186	743	2569	2538	17940	12467	25496	28341	5611
2015-11	evolutionary biology	16642	189619		6630	6613	9673	266700	18712	18740	14385	93	20979	41036	0	189619	180858	212280	6929	18113	17141	79402	1186	743	2569	2538	17940	12467	25496	28341	5611
2015-11	genetics	15870	196728		6630	6613	9673	266700	18712	18740	14385	93	20979	41036	0	189619	196728	212280	6929	18113	17141	79402	1186	743	2569	2538	17940	12467	25496	28341	5611
2015-11	genomics	26915	239195		6630	6613	9673	266700	18712	18740	14385	93	20979	41036	0	189619	196728	239195	6929	18113	17141	79402	1186	743	2569	2538	17940	12467	25496	28341	5611
2015-11	immunology	635	7564		6630	6613	9673	266700	18712	18740	14385	93	20979	41036	0	189619	196728	239195	7564	18113	17141	79402	1186	743	2569	2538	17940	12467	25496	28341	5611
2015-11	microbiology	2849	20962		6630	6613	9673	266700	18712	18740	14385	93	20979	41036	0	189619	196728	239195	7564	20962	17141	79402	1186	743	2569	2538	17940	12467	25496	28341	5611
2015-11	molecular biology	1460	18601		6630	6613	9673	266700	18712	18740	14385	93	20979	41036	0	189619	196728	239195	7564	20962	18601	79402	1186	743	2569	2538	17940	12467	25496	28341	5611
2015-11	neuroscience	6590	85992		6630	6613	9673	266700	18712	18740	14385	93	20979	41036	0	189619	196728	239195	7564	20962	18601	85992	1186	743	2569	2538	17940	12467	25496	28341	5611
2015-11	paleontology	163	1349		6630	6613	9673	266700	18712	18740	14385	93	20979	41036	0	189619	196728	239195	7564	20962	18601	85992	1349	743	2569	2538	17940	12467	25496	28341	5611
2015-11	pathology	94	837		6630	6613	9673	266700	18712	18740	14385	93	20979	41036	0	189619	196728	239195	7564	20962	18601	85992	1349	837	2569	2538	17940	12467	25496	28341	5611
2015-11	pharmacology and toxicology	230	2799		6630	6613	9673	266700	18712	18740	14385	93	20979	41036	0	189619	196728	239195	7564	20962	18601	85992	1349	837	2799	2538	17940	12467	25496	28341	5611
2015-11	physiology	393	2931		6630	6613	9673	266700	18712	18740	14385	93	20979	41036	0	189619	196728	239195	7564	20962	18601	85992	1349	837	2799	2931	17940	12467	25496	28341	5611
2015-11	plant biology	2052	19992		6630	6613	9673	266700	18712	18740	14385	93	20979	41036	0	189619	196728	239195	7564	20962	18601	85992	1349	837	2799	2931	19992	12467	25496	28341	5611
2015-11	scientific communication and education	2101	14568		6630	6613	9673	266700	18712	18740	14385	93	20979	41036	0	189619	196728	239195	7564	20962	18601	85992	1349	837	2799	2931	19992	14568	25496	28341	5611
2015-11	synthetic biology	1621	27117		6630	6613	9673	266700	18712	18740	14385	93	20979	41036	0	189619	196728	239195	7564	20962	18601	85992	1349	837	2799	2931	19992	14568	27117	28341	5611
2015-11	systems biology	2495	30836		6630	6613	9673	266700	18712	18740	14385	93	20979	41036	0	189619	196728	239195	7564	20962	18601	85992	1349	837	2799	2931	19992	14568	27117	30836	5611
2015-11	zoology	353	5964		6630	6613	9673	266700	18712	18740	14385	93	20979	41036	0	189619	196728	239195	7564	20962	18601	85992	1349	837	2799	2931	19992	14568	27117	30836	5964
2015-12	animal behavior and cognition	935	7565		7565	6613	9673	266700	18712	18740	14385	93	20979	41036	0	189619	196728	239195	7564	20962	18601	85992	1349	837	2799	2931	19992	14568	27117	30836	5964
2015-12	biochemistry	807	7420		7565	7420	9673	266700	18712	18740	14385	93	20979	41036	0	189619	196728	239195	7564	20962	18601	85992	1349	837	2799	2931	19992	14568	27117	30836	5964
2015-12	bioengineering	802	10475		7565	7420	10475	266700	18712	18740	14385	93	20979	41036	0	189619	196728	239195	7564	20962	18601	85992	1349	837	2799	2931	19992	14568	27117	30836	5964
2015-12	bioinformatics	19265	285965		7565	7420	10475	285965	18712	18740	14385	93	20979	41036	0	189619	196728	239195	7564	20962	18601	85992	1349	837	2799	2931	19992	14568	27117	30836	5964
2015-12	biophysics	1285	19997		7565	7420	10475	285965	19997	18740	14385	93	20979	41036	0	189619	196728	239195	7564	20962	18601	85992	1349	837	2799	2931	19992	14568	27117	30836	5964
2015-12	cancer biology	1597	20337		7565	7420	10475	285965	19997	20337	14385	93	20979	41036	0	189619	196728	239195	7564	20962	18601	85992	1349	837	2799	2931	19992	14568	27117	30836	5964
2015-12	cell biology	836	15221		7565	7420	10475	285965	19997	20337	15221	93	20979	41036	0	189619	196728	239195	7564	20962	18601	85992	1349	837	2799	2931	19992	14568	27117	30836	5964
2015-12	clinical trials	736	829		7565	7420	10475	285965	19997	20337	15221	829	20979	41036	0	189619	196728	239195	7564	20962	18601	85992	1349	837	2799	2931	19992	14568	27117	30836	5964
2015-12	developmental biology	1143	22122		7565	7420	10475	285965	19997	20337	15221	829	22122	41036	0	189619	196728	239195	7564	20962	18601	85992	1349	837	2799	2931	19992	14568	27117	30836	5964
2015-12	ecology	3243	44279		7565	7420	10475	285965	19997	20337	15221	829	22122	44279	0	189619	196728	239195	7564	20962	18601	85992	1349	837	2799	2931	19992	14568	27117	30836	5964
2015-12	evolutionary biology	14516	204135		7565	7420	10475	285965	19997	20337	15221	829	22122	44279	0	204135	196728	239195	7564	20962	18601	85992	1349	837	2799	2931	19992	14568	27117	30836	5964
2015-12	genetics	11369	208097		7565	7420	10475	285965	19997	20337	15221	829	22122	44279	0	204135	208097	239195	7564	20962	18601	85992	1349	837	2799	2931	19992	14568	27117	30836	5964
2015-12	genomics	24510	263705		7565	7420	10475	285965	19997	20337	15221	829	22122	44279	0	204135	208097	263705	7564	20962	18601	85992	1349	837	2799	2931	19992	14568	27117	30836	5964
2015-12	immunology	489	8053		7565	7420	10475	285965	19997	20337	15221	829	22122	44279	0	204135	208097	263705	8053	20962	18601	85992	1349	837	2799	2931	19992	14568	27117	30836	5964
2015-12	microbiology	3700	24662		7565	7420	10475	285965	19997	20337	15221	829	22122	44279	0	204135	208097	263705	8053	24662	18601	85992	1349	837	2799	2931	19992	14568	27117	30836	5964
2015-12	molecular biology	1152	19753		7565	7420	10475	285965	19997	20337	15221	829	22122	44279	0	204135	208097	263705	8053	24662	19753	85992	1349	837	2799	2931	19992	14568	27117	30836	5964
2015-12	neuroscience	7886	93878		7565	7420	10475	285965	19997	20337	15221	829	22122	44279	0	204135	208097	263705	8053	24662	19753	93878	1349	837	2799	2931	19992	14568	27117	30836	5964
2015-12	paleontology	156	1505		7565	7420	10475	285965	19997	20337	15221	829	22122	44279	0	204135	208097	263705	8053	24662	19753	93878	1505	837	2799	2931	19992	14568	27117	30836	5964
2015-12	pathology	139	976		7565	7420	10475	285965	19997	20337	15221	829	22122	44279	0	204135	208097	263705	8053	24662	19753	93878	1505	976	2799	2931	19992	14568	27117	30836	5964
2015-12	pharmacology and toxicology	206	3005		7565	7420	10475	285965	19997	20337	15221	829	22122	44279	0	204135	208097	263705	8053	24662	19753	93878	1505	976	3005	2931	19992	14568	27117	30836	5964
2015-12	physiology	267	3198		7565	7420	10475	285965	19997	20337	15221	829	22122	44279	0	204135	208097	263705	8053	24662	19753	93878	1505	976	3005	3198	19992	14568	27117	30836	5964
2015-12	plant biology	2769	22761		7565	7420	10475	285965	19997	20337	15221	829	22122	44279	0	204135	208097	263705	8053	24662	19753	93878	1505	976	3005	3198	22761	14568	27117	30836	5964
2015-12	scientific communication and education	786	15354		7565	7420	10475	285965	19997	20337	15221	829	22122	44279	0	204135	208097	263705	8053	24662	19753	93878	1505	976	3005	3198	22761	15354	27117	30836	5964
2015-12	synthetic biology	1521	28638		7565	7420	10475	285965	19997	20337	15221	829	22122	44279	0	204135	208097	263705	8053	24662	19753	93878	1505	976	3005	3198	22761	15354	28638	30836	5964
2015-12	systems biology	2951	33787		7565	7420	10475	285965	19997	20337	15221	829	22122	44279	0	204135	208097	263705	8053	24662	19753	93878	1505	976	3005	3198	22761	15354	28638	33787	5964
2015-12	zoology	615	6579		7565	7420	10475	285965	19997	20337	15221	829	22122	44279	0	204135	208097	263705	8053	24662	19753	93878	1505	976	3005	3198	22761	15354	28638	33787	6579
2016-01	animal behavior and cognition	1307	8872		8872	7420	10475	285965	19997	20337	15221	829	22122	44279	0	204135	208097	263705	8053	24662	19753	93878	1505	976	3005	3198	22761	15354	28638	33787	6579
2016-01	biochemistry	829	8249		8872	8249	10475	285965	19997	20337	15221	829	22122	44279	0	204135	208097	263705	8053	24662	19753	93878	1505	976	3005	3198	22761	15354	28638	33787	6579
2016-01	bioengineering	1239	11714		8872	8249	11714	285965	19997	20337	15221	829	22122	44279	0	204135	208097	263705	8053	24662	19753	93878	1505	976	3005	3198	22761	15354	28638	33787	6579
2016-01	bioinformatics	26471	312436		8872	8249	11714	312436	19997	20337	15221	829	22122	44279	0	204135	208097	263705	8053	24662	19753	93878	1505	976	3005	3198	22761	15354	28638	33787	6579
2016-01	biophysics	1982	21979		8872	8249	11714	312436	21979	20337	15221	829	22122	44279	0	204135	208097	263705	8053	24662	19753	93878	1505	976	3005	3198	22761	15354	28638	33787	6579
2016-01	cancer biology	2992	23329		8872	8249	11714	312436	21979	23329	15221	829	22122	44279	0	204135	208097	263705	8053	24662	19753	93878	1505	976	3005	3198	22761	15354	28638	33787	6579
2016-01	cell biology	1274	16495		8872	8249	11714	312436	21979	23329	16495	829	22122	44279	0	204135	208097	263705	8053	24662	19753	93878	1505	976	3005	3198	22761	15354	28638	33787	6579
2016-01	clinical trials	156	985		8872	8249	11714	312436	21979	23329	16495	985	22122	44279	0	204135	208097	263705	8053	24662	19753	93878	1505	976	3005	3198	22761	15354	28638	33787	6579
2016-01	developmental biology	1979	24101		8872	8249	11714	312436	21979	23329	16495	985	24101	44279	0	204135	208097	263705	8053	24662	19753	93878	1505	976	3005	3198	22761	15354	28638	33787	6579
2016-01	ecology	3843	48122		8872	8249	11714	312436	21979	23329	16495	985	24101	48122	0	204135	208097	263705	8053	24662	19753	93878	1505	976	3005	3198	22761	15354	28638	33787	6579
2016-01	evolutionary biology	18555	222690		8872	8249	11714	312436	21979	23329	16495	985	24101	48122	0	222690	208097	263705	8053	24662	19753	93878	1505	976	3005	3198	22761	15354	28638	33787	6579
2016-01	genetics	14280	222377		8872	8249	11714	312436	21979	23329	16495	985	24101	48122	0	222690	222377	263705	8053	24662	19753	93878	1505	976	3005	3198	22761	15354	28638	33787	6579
2016-01	genomics	31049	294754		8872	8249	11714	312436	21979	23329	16495	985	24101	48122	0	222690	222377	294754	8053	24662	19753	93878	1505	976	3005	3198	22761	15354	28638	33787	6579
2016-01	immunology	841	8894		8872	8249	11714	312436	21979	23329	16495	985	24101	48122	0	222690	222377	294754	8894	24662	19753	93878	1505	976	3005	3198	22761	15354	28638	33787	6579
2016-01	microbiology	5266	29928		8872	8249	11714	312436	21979	23329	16495	985	24101	48122	0	222690	222377	294754	8894	29928	19753	93878	1505	976	3005	3198	22761	15354	28638	33787	6579
2016-01	molecular biology	1420	21173		8872	8249	11714	312436	21979	23329	16495	985	24101	48122	0	222690	222377	294754	8894	29928	21173	93878	1505	976	3005	3198	22761	15354	28638	33787	6579
2016-01	neuroscience	10880	104758		8872	8249	11714	312436	21979	23329	16495	985	24101	48122	0	222690	222377	294754	8894	29928	21173	104758	1505	976	3005	3198	22761	15354	28638	33787	6579
2016-01	paleontology	112	1617		8872	8249	11714	312436	21979	23329	16495	985	24101	48122	0	222690	222377	294754	8894	29928	21173	104758	1617	976	3005	3198	22761	15354	28638	33787	6579
2016-01	pathology	196	1172		8872	8249	11714	312436	21979	23329	16495	985	24101	48122	0	222690	222377	294754	8894	29928	21173	104758	1617	1172	3005	3198	22761	15354	28638	33787	6579
2016-01	pharmacology and toxicology	193	3198		8872	8249	11714	312436	21979	23329	16495	985	24101	48122	0	222690	222377	294754	8894	29928	21173	104758	1617	1172	3198	3198	22761	15354	28638	33787	6579
2016-01	physiology	352	3550		8872	8249	11714	312436	21979	23329	16495	985	24101	48122	0	222690	222377	294754	8894	29928	21173	104758	1617	1172	3198	3550	22761	15354	28638	33787	6579
2016-01	plant biology	3153	25914		8872	8249	11714	312436	21979	23329	16495	985	24101	48122	0	222690	222377	294754	8894	29928	21173	104758	1617	1172	3198	3550	25914	15354	28638	33787	6579
2016-01	scientific communication and education	1191	16545		8872	8249	11714	312436	21979	23329	16495	985	24101	48122	0	222690	222377	294754	8894	29928	21173	104758	1617	1172	3198	3550	25914	16545	28638	33787	6579
2016-01	synthetic biology	1809	30447		8872	8249	11714	312436	21979	23329	16495	985	24101	48122	0	222690	222377	294754	8894	29928	21173	104758	1617	1172	3198	3550	25914	16545	30447	33787	6579
2016-01	systems biology	13438	47225		8872	8249	11714	312436	21979	23329	16495	985	24101	48122	0	222690	222377	294754	8894	29928	21173	104758	1617	1172	3198	3550	25914	16545	30447	47225	6579
2016-01	zoology	971	7550		8872	8249	11714	312436	21979	23329	16495	985	24101	48122	0	222690	222377	294754	8894	29928	21173	104758	1617	1172	3198	3550	25914	16545	30447	47225	7550
2016-02	animal behavior and cognition	1363	10235		10235	8249	11714	312436	21979	23329	16495	985	24101	48122	0	222690	222377	294754	8894	29928	21173	104758	1617	1172	3198	3550	25914	16545	30447	47225	7550
2016-02	biochemistry	1554	9803		10235	9803	11714	312436	21979	23329	16495	985	24101	48122	0	222690	222377	294754	8894	29928	21173	104758	1617	1172	3198	3550	25914	16545	30447	47225	7550
2016-02	bioengineering	1207	12921		10235	9803	12921	312436	21979	23329	16495	985	24101	48122	0	222690	222377	294754	8894	29928	21173	104758	1617	1172	3198	3550	25914	16545	30447	47225	7550
2016-02	bioinformatics	25866	338302		10235	9803	12921	338302	21979	23329	16495	985	24101	48122	0	222690	222377	294754	8894	29928	21173	104758	1617	1172	3198	3550	25914	16545	30447	47225	7550
2016-02	biophysics	2447	24426		10235	9803	12921	338302	24426	23329	16495	985	24101	48122	0	222690	222377	294754	8894	29928	21173	104758	1617	1172	3198	3550	25914	16545	30447	47225	7550
2016-02	cancer biology	2867	26196		10235	9803	12921	338302	24426	26196	16495	985	24101	48122	0	222690	222377	294754	8894	29928	21173	104758	1617	1172	3198	3550	25914	16545	30447	47225	7550
2016-02	cell biology	2288	18783		10235	9803	12921	338302	24426	26196	18783	985	24101	48122	0	222690	222377	294754	8894	29928	21173	104758	1617	1172	3198	3550	25914	16545	30447	47225	7550
2016-02	clinical trials	63	1048		10235	9803	12921	338302	24426	26196	18783	1048	24101	48122	0	222690	222377	294754	8894	29928	21173	104758	1617	1172	3198	3550	25914	16545	30447	47225	7550
2016-02	developmental biology	1676	25777		10235	9803	12921	338302	24426	26196	18783	1048	25777	48122	0	222690	222377	294754	8894	29928	21173	104758	1617	1172	3198	3550	25914	16545	30447	47225	7550
2016-02	ecology	8378	56500		10235	9803	12921	338302	24426	26196	18783	1048	25777	56500	0	222690	222377	294754	8894	29928	21173	104758	1617	1172	3198	3550	25914	16545	30447	47225	7550
2016-02	evolutionary biology	17449	240139		10235	9803	12921	338302	24426	26196	18783	1048	25777	56500	0	240139	222377	294754	8894	29928	21173	104758	1617	1172	3198	3550	25914	16545	30447	47225	7550
2016-02	genetics	16495	238872		10235	9803	12921	338302	24426	26196	18783	1048	25777	56500	0	240139	238872	294754	8894	29928	21173	104758	1617	1172	3198	3550	25914	16545	30447	47225	7550
2016-02	genomics	34861	329615		10235	9803	12921	338302	24426	26196	18783	1048	25777	56500	0	240139	238872	329615	8894	29928	21173	104758	1617	1172	3198	3550	25914	16545	30447	47225	7550
2016-02	immunology	849	9743		10235	9803	12921	338302	24426	26196	18783	1048	25777	56500	0	240139	238872	329615	9743	29928	21173	104758	1617	1172	3198	3550	25914	16545	30447	47225	7550
2016-02	microbiology	6411	36339		10235	9803	12921	338302	24426	26196	18783	1048	25777	56500	0	240139	238872	329615	9743	36339	21173	104758	1617	1172	3198	3550	25914	16545	30447	47225	7550
2016-02	molecular biology	1381	22554		10235	9803	12921	338302	24426	26196	18783	1048	25777	56500	0	240139	238872	329615	9743	36339	22554	104758	1617	1172	3198	3550	25914	16545	30447	47225	7550
2016-02	neuroscience	11228	115986		10235	9803	12921	338302	24426	26196	18783	1048	25777	56500	0	240139	238872	329615	9743	36339	22554	115986	1617	1172	3198	3550	25914	16545	30447	47225	7550
2016-02	paleontology	149	1766		10235	9803	12921	338302	24426	26196	18783	1048	25777	56500	0	240139	238872	329615	9743	36339	22554	115986	1766	1172	3198	3550	25914	16545	30447	47225	7550
2016-02	pathology	169	1341		10235	9803	12921	338302	24426	26196	18783	1048	25777	56500	0	240139	238872	329615	9743	36339	22554	115986	1766	1341	3198	3550	25914	16545	30447	47225	7550
2016-02	pharmacology and toxicology	372	3570		10235	9803	12921	338302	24426	26196	18783	1048	25777	56500	0	240139	238872	329615	9743	36339	22554	115986	1766	1341	3570	3550	25914	16545	30447	47225	7550
2016-02	physiology	278	3828		10235	9803	12921	338302	24426	26196	18783	1048	25777	56500	0	240139	238872	329615	9743	36339	22554	115986	1766	1341	3570	3828	25914	16545	30447	47225	7550
2016-02	plant biology	3239	29153		10235	9803	12921	338302	24426	26196	18783	1048	25777	56500	0	240139	238872	329615	9743	36339	22554	115986	1766	1341	3570	3828	29153	16545	30447	47225	7550
2016-02	scientific communication and education	1017	17562		10235	9803	12921	338302	24426	26196	18783	1048	25777	56500	0	240139	238872	329615	9743	36339	22554	115986	1766	1341	3570	3828	29153	17562	30447	47225	7550
2016-02	synthetic biology	1491	31938		10235	9803	12921	338302	24426	26196	18783	1048	25777	56500	0	240139	238872	329615	9743	36339	22554	115986	1766	1341	3570	3828	29153	17562	31938	47225	7550
2016-02	systems biology	6733	53958		10235	9803	12921	338302	24426	26196	18783	1048	25777	56500	0	240139	238872	329615	9743	36339	22554	115986	1766	1341	3570	3828	29153	17562	31938	53958	7550
2016-02	zoology	452	8002		10235	9803	12921	338302	24426	26196	18783	1048	25777	56500	0	240139	238872	329615	9743	36339	22554	115986	1766	1341	3570	3828	29153	17562	31938	53958	8002
2016-03	animal behavior and cognition	1719	11954		11954	9803	12921	338302	24426	26196	18783	1048	25777	56500	0	240139	238872	329615	9743	36339	22554	115986	1766	1341	3570	3828	29153	17562	31938	53958	8002
2016-03	biochemistry	1951	11754		11954	11754	12921	338302	24426	26196	18783	1048	25777	56500	0	240139	238872	329615	9743	36339	22554	115986	1766	1341	3570	3828	29153	17562	31938	53958	8002
2016-03	bioengineering	1647	14568		11954	11754	14568	338302	24426	26196	18783	1048	25777	56500	0	240139	238872	329615	9743	36339	22554	115986	1766	1341	3570	3828	29153	17562	31938	53958	8002
2016-03	bioinformatics	33138	371440		11954	11754	14568	371440	24426	26196	18783	1048	25777	56500	0	240139	238872	329615	9743	36339	22554	115986	1766	1341	3570	3828	29153	17562	31938	53958	8002
2016-03	biophysics	2995	27421		11954	11754	14568	371440	27421	26196	18783	1048	25777	56500	0	240139	238872	329615	9743	36339	22554	115986	1766	1341	3570	3828	29153	17562	31938	53958	8002
2016-03	cancer biology	3617	29813		11954	11754	14568	371440	27421	29813	18783	1048	25777	56500	0	240139	238872	329615	9743	36339	22554	115986	1766	1341	3570	3828	29153	17562	31938	53958	8002
2016-03	cell biology	4565	23348		11954	11754	14568	371440	27421	29813	23348	1048	25777	56500	0	240139	238872	329615	9743	36339	22554	115986	1766	1341	3570	3828	29153	17562	31938	53958	8002
2016-03	clinical trials	80	1128		11954	11754	14568	371440	27421	29813	23348	1128	25777	56500	0	240139	238872	329615	9743	36339	22554	115986	1766	1341	3570	3828	29153	17562	31938	53958	8002
2016-03	developmental biology	2436	28213		11954	11754	14568	371440	27421	29813	23348	1128	28213	56500	0	240139	238872	329615	9743	36339	22554	115986	1766	1341	3570	3828	29153	17562	31938	53958	8002
2016-03	ecology	11323	67823		11954	11754	14568	371440	27421	29813	23348	1128	28213	67823	0	240139	238872	329615	9743	36339	22554	115986	1766	1341	3570	3828	29153	17562	31938	53958	8002
2016-03	evolutionary biology	23415	263554		11954	11754	14568	371440	27421	29813	23348	1128	28213	67823	0	263554	238872	329615	9743	36339	22554	115986	1766	1341	3570	3828	29153	17562	31938	53958	8002
2016-03	genetics	19886	258758		11954	11754	14568	371440	27421	29813	23348	1128	28213	67823	0	263554	258758	329615	9743	36339	22554	115986	1766	1341	3570	3828	29153	17562	31938	53958	8002
2016-03	genomics	33638	363253		11954	11754	14568	371440	27421	29813	23348	1128	28213	67823	0	263554	258758	363253	9743	36339	22554	115986	1766	1341	3570	3828	29153	17562	31938	53958	8002
2016-03	immunology	1697	11440		11954	11754	14568	371440	27421	29813	23348	1128	28213	67823	0	263554	258758	363253	11440	36339	22554	115986	1766	1341	3570	3828	29153	17562	31938	53958	8002
2016-03	microbiology	7258	43597		11954	11754	14568	371440	27421	29813	23348	1128	28213	67823	0	263554	258758	363253	11440	43597	22554	115986	1766	1341	3570	3828	29153	17562	31938	53958	8002
2016-03	molecular biology	2612	25166		11954	11754	14568	371440	27421	29813	23348	1128	28213	67823	0	263554	258758	363253	11440	43597	25166	115986	1766	1341	3570	3828	29153	17562	31938	53958	8002
2016-03	neuroscience	17100	133086		11954	11754	14568	371440	27421	29813	23348	1128	28213	67823	0	263554	258758	363253	11440	43597	25166	133086	1766	1341	3570	3828	29153	17562	31938	53958	8002
2016-03	paleontology	675	2441		11954	11754	14568	371440	27421	29813	23348	1128	28213	67823	0	263554	258758	363253	11440	43597	25166	133086	2441	1341	3570	3828	29153	17562	31938	53958	8002
2016-03	pathology	289	1630		11954	11754	14568	371440	27421	29813	23348	1128	28213	67823	0	263554	258758	363253	11440	43597	25166	133086	2441	1630	3570	3828	29153	17562	31938	53958	8002
2016-03	pharmacology and toxicology	748	4318		11954	11754	14568	371440	27421	29813	23348	1128	28213	67823	0	263554	258758	363253	11440	43597	25166	133086	2441	1630	4318	3828	29153	17562	31938	53958	8002
2016-03	physiology	782	4610		11954	11754	14568	371440	27421	29813	23348	1128	28213	67823	0	263554	258758	363253	11440	43597	25166	133086	2441	1630	4318	4610	29153	17562	31938	53958	8002
2016-03	plant biology	3870	33023		11954	11754	14568	371440	27421	29813	23348	1128	28213	67823	0	263554	258758	363253	11440	43597	25166	133086	2441	1630	4318	4610	33023	17562	31938	53958	8002
2016-03	scientific communication and education	1777	19339		11954	11754	14568	371440	27421	29813	23348	1128	28213	67823	0	263554	258758	363253	11440	43597	25166	133086	2441	1630	4318	4610	33023	19339	31938	53958	8002
2016-03	synthetic biology	1944	33882		11954	11754	14568	371440	27421	29813	23348	1128	28213	67823	0	263554	258758	363253	11440	43597	25166	133086	2441	1630	4318	4610	33023	19339	33882	53958	8002
2016-03	systems biology	7831	61789		11954	11754	14568	371440	27421	29813	23348	1128	28213	67823	0	263554	258758	363253	11440	43597	25166	133086	2441	1630	4318	4610	33023	19339	33882	61789	8002
2016-03	zoology	519	8521		11954	11754	14568	371440	27421	29813	23348	1128	28213	67823	0	263554	258758	363253	11440	43597	25166	133086	2441	1630	4318	4610	33023	19339	33882	61789	8521
2016-04	animal behavior and cognition	1688	13642		13642	11754	14568	371440	27421	29813	23348	1128	28213	67823	0	263554	258758	363253	11440	43597	25166	133086	2441	1630	4318	4610	33023	19339	33882	61789	8521
2016-04	biochemistry	2171	13925		13642	13925	14568	371440	27421	29813	23348	1128	28213	67823	0	263554	258758	363253	11440	43597	25166	133086	2441	1630	4318	4610	33023	19339	33882	61789	8521
2016-04	bioengineering	1992	16560		13642	13925	16560	371440	27421	29813	23348	1128	28213	67823	0	263554	258758	363253	11440	43597	25166	133086	2441	1630	4318	4610	33023	19339	33882	61789	8521
2016-04	bioinformatics	37795	409235		13642	13925	16560	409235	27421	29813	23348	1128	28213	67823	0	263554	258758	363253	11440	43597	25166	133086	2441	1630	4318	4610	33023	19339	33882	61789	8521
2016-04	biophysics	3005	30426		13642	13925	16560	409235	30426	29813	23348	1128	28213	67823	0	263554	258758	363253	11440	43597	25166	133086	2441	1630	4318	4610	33023	19339	33882	61789	8521
2016-04	cancer biology	4294	34107		13642	13925	16560	409235	30426	34107	23348	1128	28213	67823	0	263554	258758	363253	11440	43597	25166	133086	2441	1630	4318	4610	33023	19339	33882	61789	8521
2016-04	cell biology	8095	31443		13642	13925	16560	409235	30426	34107	31443	1128	28213	67823	0	263554	258758	363253	11440	43597	25166	133086	2441	1630	4318	4610	33023	19339	33882	61789	8521
2016-04	clinical trials	17	1145		13642	13925	16560	409235	30426	34107	31443	1145	28213	67823	0	263554	258758	363253	11440	43597	25166	133086	2441	1630	4318	4610	33023	19339	33882	61789	8521
2016-04	developmental biology	2786	30999		13642	13925	16560	409235	30426	34107	31443	1145	30999	67823	0	263554	258758	363253	11440	43597	25166	133086	2441	1630	4318	4610	33023	19339	33882	61789	8521
2016-04	ecology	8427	76250		13642	13925	16560	409235	30426	34107	31443	1145	30999	76250	0	263554	258758	363253	11440	43597	25166	133086	2441	1630	4318	4610	33023	19339	33882	61789	8521
2016-04	epidemiology	228	228		13642	13925	16560	409235	30426	34107	31443	1145	30999	76250	228	263554	258758	363253	11440	43597	25166	133086	2441	1630	4318	4610	33023	19339	33882	61789	8521
2016-04	evolutionary biology	19944	283498		13642	13925	16560	409235	30426	34107	31443	1145	30999	76250	228	283498	258758	363253	11440	43597	25166	133086	2441	1630	4318	4610	33023	19339	33882	61789	8521
2016-04	genetics	20362	279120		13642	13925	16560	409235	30426	34107	31443	1145	30999	76250	228	283498	279120	363253	11440	43597	25166	133086	2441	1630	4318	4610	33023	19339	33882	61789	8521
2016-04	genomics	33647	396900		13642	13925	16560	409235	30426	34107	31443	1145	30999	76250	228	283498	279120	396900	11440	43597	25166	133086	2441	1630	4318	4610	33023	19339	33882	61789	8521
2016-04	immunology	4538	15978		13642	13925	16560	409235	30426	34107	31443	1145	30999	76250	228	283498	279120	396900	15978	43597	25166	133086	2441	1630	4318	4610	33023	19339	33882	61789	8521
2016-04	microbiology	11095	54692		13642	13925	16560	409235	30426	34107	31443	1145	30999	76250	228	283498	279120	396900	15978	54692	25166	133086	2441	1630	4318	4610	33023	19339	33882	61789	8521
2016-04	molecular biology	3225	28391		13642	13925	16560	409235	30426	34107	31443	1145	30999	76250	228	283498	279120	396900	15978	54692	28391	133086	2441	1630	4318	4610	33023	19339	33882	61789	8521
2016-04	neuroscience	17508	150594		13642	13925	16560	409235	30426	34107	31443	1145	30999	76250	228	283498	279120	396900	15978	54692	28391	150594	2441	1630	4318	4610	33023	19339	33882	61789	8521
2016-04	paleontology	256	2697		13642	13925	16560	409235	30426	34107	31443	1145	30999	76250	228	283498	279120	396900	15978	54692	28391	150594	2697	1630	4318	4610	33023	19339	33882	61789	8521
2016-04	pathology	662	2292		13642	13925	16560	409235	30426	34107	31443	1145	30999	76250	228	283498	279120	396900	15978	54692	28391	150594	2697	2292	4318	4610	33023	19339	33882	61789	8521
2016-04	pharmacology and toxicology	732	5050		13642	13925	16560	409235	30426	34107	31443	1145	30999	76250	228	283498	279120	396900	15978	54692	28391	150594	2697	2292	5050	4610	33023	19339	33882	61789	8521
2016-04	physiology	427	5037		13642	13925	16560	409235	30426	34107	31443	1145	30999	76250	228	283498	279120	396900	15978	54692	28391	150594	2697	2292	5050	5037	33023	19339	33882	61789	8521
2016-04	plant biology	3691	36714		13642	13925	16560	409235	30426	34107	31443	1145	30999	76250	228	283498	279120	396900	15978	54692	28391	150594	2697	2292	5050	5037	36714	19339	33882	61789	8521
2016-04	scientific communication and education	6396	25735		13642	13925	16560	409235	30426	34107	31443	1145	30999	76250	228	283498	279120	396900	15978	54692	28391	150594	2697	2292	5050	5037	36714	25735	33882	61789	8521
2016-04	synthetic biology	1798	35680		13642	13925	16560	409235	30426	34107	31443	1145	30999	76250	228	283498	279120	396900	15978	54692	28391	150594	2697	2292	5050	5037	36714	25735	35680	61789	8521
2016-04	systems biology	6433	68222		13642	13925	16560	409235	30426	34107	31443	1145	30999	76250	228	283498	279120	396900	15978	54692	28391	150594	2697	2292	5050	5037	36714	25735	35680	68222	8521
2016-04	zoology	768	9289		13642	13925	16560	409235	30426	34107	31443	1145	30999	76250	228	283498	279120	396900	15978	54692	28391	150594	2697	2292	5050	5037	36714	25735	35680	68222	9289
2016-05	animal behavior and cognition	2299	15941		15941	13925	16560	409235	30426	34107	31443	1145	30999	76250	228	283498	279120	396900	15978	54692	28391	150594	2697	2292	5050	5037	36714	25735	35680	68222	9289
2016-05	biochemistry	2474	16399		15941	16399	16560	409235	30426	34107	31443	1145	30999	76250	228	283498	279120	396900	15978	54692	28391	150594	2697	2292	5050	5037	36714	25735	35680	68222	9289
2016-05	bioengineering	1822	18382		15941	16399	18382	409235	30426	34107	31443	1145	30999	76250	228	283498	279120	396900	15978	54692	28391	150594	2697	2292	5050	5037	36714	25735	35680	68222	9289
2016-05	bioinformatics	42501	451736		15941	16399	18382	451736	30426	34107	31443	1145	30999	76250	228	283498	279120	396900	15978	54692	28391	150594	2697	2292	5050	5037	36714	25735	35680	68222	9289
2016-05	biophysics	3553	33979		15941	16399	18382	451736	33979	34107	31443	1145	30999	76250	228	283498	279120	396900	15978	54692	28391	150594	2697	2292	5050	5037	36714	25735	35680	68222	9289
2016-05	cancer biology	100546	134653		15941	16399	18382	451736	33979	134653	31443	1145	30999	76250	228	283498	279120	396900	15978	54692	28391	150594	2697	2292	5050	5037	36714	25735	35680	68222	9289
2016-05	cell biology	5482	36925		15941	16399	18382	451736	33979	134653	36925	1145	30999	76250	228	283498	279120	396900	15978	54692	28391	150594	2697	2292	5050	5037	36714	25735	35680	68222	9289
2016-05	clinical trials	52	1197		15941	16399	18382	451736	33979	134653	36925	1197	30999	76250	228	283498	279120	396900	15978	54692	28391	150594	2697	2292	5050	5037	36714	25735	35680	68222	9289
2016-05	developmental biology	5413	36412		15941	16399	18382	451736	33979	134653	36925	1197	36412	76250	228	283498	279120	396900	15978	54692	28391	150594	2697	2292	5050	5037	36714	25735	35680	68222	9289
2016-05	ecology	9414	85664		15941	16399	18382	451736	33979	134653	36925	1197	36412	85664	228	283498	279120	396900	15978	54692	28391	150594	2697	2292	5050	5037	36714	25735	35680	68222	9289
2016-05	epidemiology	1611	1839		15941	16399	18382	451736	33979	134653	36925	1197	36412	85664	1839	283498	279120	396900	15978	54692	28391	150594	2697	2292	5050	5037	36714	25735	35680	68222	9289
2016-05	evolutionary biology	22255	305753		15941	16399	18382	451736	33979	134653	36925	1197	36412	85664	1839	305753	279120	396900	15978	54692	28391	150594	2697	2292	5050	5037	36714	25735	35680	68222	9289
2016-05	genetics	24620	303740		15941	16399	18382	451736	33979	134653	36925	1197	36412	85664	1839	305753	303740	396900	15978	54692	28391	150594	2697	2292	5050	5037	36714	25735	35680	68222	9289
2016-05	genomics	36279	433179		15941	16399	18382	451736	33979	134653	36925	1197	36412	85664	1839	305753	303740	433179	15978	54692	28391	150594	2697	2292	5050	5037	36714	25735	35680	68222	9289
2016-05	immunology	3094	19072		15941	16399	18382	451736	33979	134653	36925	1197	36412	85664	1839	305753	303740	433179	19072	54692	28391	150594	2697	2292	5050	5037	36714	25735	35680	68222	9289
2016-05	microbiology	10433	65125		15941	16399	18382	451736	33979	134653	36925	1197	36412	85664	1839	305753	303740	433179	19072	65125	28391	150594	2697	2292	5050	5037	36714	25735	35680	68222	9289
2016-05	molecular biology	4997	33388		15941	16399	18382	451736	33979	134653	36925	1197	36412	85664	1839	305753	303740	433179	19072	65125	33388	150594	2697	2292	5050	5037	36714	25735	35680	68222	9289
2016-05	neuroscience	56927	207521		15941	16399	18382	451736	33979	134653	36925	1197	36412	85664	1839	305753	303740	433179	19072	65125	33388	207521	2697	2292	5050	5037	36714	25735	35680	68222	9289
2016-05	paleontology	216	2913		15941	16399	18382	451736	33979	134653	36925	1197	36412	85664	1839	305753	303740	433179	19072	65125	33388	207521	2913	2292	5050	5037	36714	25735	35680	68222	9289
2016-05	pathology	617	2909		15941	16399	18382	451736	33979	134653	36925	1197	36412	85664	1839	305753	303740	433179	19072	65125	33388	207521	2913	2909	5050	5037	36714	25735	35680	68222	9289
2016-05	pharmacology and toxicology	424	5474		15941	16399	18382	451736	33979	134653	36925	1197	36412	85664	1839	305753	303740	433179	19072	65125	33388	207521	2913	2909	5474	5037	36714	25735	35680	68222	9289
2016-05	physiology	1190	6227		15941	16399	18382	451736	33979	134653	36925	1197	36412	85664	1839	305753	303740	433179	19072	65125	33388	207521	2913	2909	5474	6227	36714	25735	35680	68222	9289
2016-05	plant biology	3110	39824		15941	16399	18382	451736	33979	134653	36925	1197	36412	85664	1839	305753	303740	433179	19072	65125	33388	207521	2913	2909	5474	6227	39824	25735	35680	68222	9289
2016-05	scientific communication and education	2933	28668		15941	16399	18382	451736	33979	134653	36925	1197	36412	85664	1839	305753	303740	433179	19072	65125	33388	207521	2913	2909	5474	6227	39824	28668	35680	68222	9289
2016-05	synthetic biology	3583	39263		15941	16399	18382	451736	33979	134653	36925	1197	36412	85664	1839	305753	303740	433179	19072	65125	33388	207521	2913	2909	5474	6227	39824	28668	39263	68222	9289
2016-05	systems biology	7831	76053		15941	16399	18382	451736	33979	134653	36925	1197	36412	85664	1839	305753	303740	433179	19072	65125	33388	207521	2913	2909	5474	6227	39824	28668	39263	76053	9289
2016-05	zoology	790	10079		15941	16399	18382	451736	33979	134653	36925	1197	36412	85664	1839	305753	303740	433179	19072	65125	33388	207521	2913	2909	5474	6227	39824	28668	39263	76053	10079
2016-06	animal behavior and cognition	2528	18469		18469	16399	18382	451736	33979	134653	36925	1197	36412	85664	1839	305753	303740	433179	19072	65125	33388	207521	2913	2909	5474	6227	39824	28668	39263	76053	10079
2016-06	biochemistry	2649	19048		18469	19048	18382	451736	33979	134653	36925	1197	36412	85664	1839	305753	303740	433179	19072	65125	33388	207521	2913	2909	5474	6227	39824	28668	39263	76053	10079
2016-06	bioengineering	1763	20145		18469	19048	20145	451736	33979	134653	36925	1197	36412	85664	1839	305753	303740	433179	19072	65125	33388	207521	2913	2909	5474	6227	39824	28668	39263	76053	10079
2016-06	bioinformatics	43392	495128		18469	19048	20145	495128	33979	134653	36925	1197	36412	85664	1839	305753	303740	433179	19072	65125	33388	207521	2913	2909	5474	6227	39824	28668	39263	76053	10079
2016-06	biophysics	4430	38409		18469	19048	20145	495128	38409	134653	36925	1197	36412	85664	1839	305753	303740	433179	19072	65125	33388	207521	2913	2909	5474	6227	39824	28668	39263	76053	10079
2016-06	cancer biology	28442	163095		18469	19048	20145	495128	38409	163095	36925	1197	36412	85664	1839	305753	303740	433179	19072	65125	33388	207521	2913	2909	5474	6227	39824	28668	39263	76053	10079
2016-06	cell biology	5751	42676		18469	19048	20145	495128	38409	163095	42676	1197	36412	85664	1839	305753	303740	433179	19072	65125	33388	207521	2913	2909	5474	6227	39824	28668	39263	76053	10079
2016-06	clinical trials	24	1221		18469	19048	20145	495128	38409	163095	42676	1221	36412	85664	1839	305753	303740	433179	19072	65125	33388	207521	2913	2909	5474	6227	39824	28668	39263	76053	10079
2016-06	developmental biology	3564	39976		18469	19048	20145	495128	38409	163095	42676	1221	39976	85664	1839	305753	303740	433179	19072	65125	33388	207521	2913	2909	5474	6227	39824	28668	39263	76053	10079
2016-06	ecology	8648	94312		18469	19048	20145	495128	38409	163095	42676	1221	39976	94312	1839	305753	303740	433179	19072	65125	33388	207521	2913	2909	5474	6227	39824	28668	39263	76053	10079
2016-06	epidemiology	1521	3360		18469	19048	20145	495128	38409	163095	42676	1221	39976	94312	3360	305753	303740	433179	19072	65125	33388	207521	2913	2909	5474	6227	39824	28668	39263	76053	10079
2016-06	evolutionary biology	21568	327321		18469	19048	20145	495128	38409	163095	42676	1221	39976	94312	3360	327321	303740	433179	19072	65125	33388	207521	2913	2909	5474	6227	39824	28668	39263	76053	10079
2016-06	genetics	27561	331301		18469	19048	20145	495128	38409	163095	42676	1221	39976	94312	3360	327321	331301	433179	19072	65125	33388	207521	2913	2909	5474	6227	39824	28668	39263	76053	10079
2016-06	genomics	38117	471296		18469	19048	20145	495128	38409	163095	42676	1221	39976	94312	3360	327321	331301	471296	19072	65125	33388	207521	2913	2909	5474	6227	39824	28668	39263	76053	10079
2016-06	immunology	2422	21494		18469	19048	20145	495128	38409	163095	42676	1221	39976	94312	3360	327321	331301	471296	21494	65125	33388	207521	2913	2909	5474	6227	39824	28668	39263	76053	10079
2016-06	microbiology	9125	74250		18469	19048	20145	495128	38409	163095	42676	1221	39976	94312	3360	327321	331301	471296	21494	74250	33388	207521	2913	2909	5474	6227	39824	28668	39263	76053	10079
2016-06	molecular biology	5572	38960		18469	19048	20145	495128	38409	163095	42676	1221	39976	94312	3360	327321	331301	471296	21494	74250	38960	207521	2913	2909	5474	6227	39824	28668	39263	76053	10079
2016-06	neuroscience	60002	267523		18469	19048	20145	495128	38409	163095	42676	1221	39976	94312	3360	327321	331301	471296	21494	74250	38960	267523	2913	2909	5474	6227	39824	28668	39263	76053	10079
2016-06	paleontology	294	3207		18469	19048	20145	495128	38409	163095	42676	1221	39976	94312	3360	327321	331301	471296	21494	74250	38960	267523	3207	2909	5474	6227	39824	28668	39263	76053	10079
2016-06	pathology	532	3441		18469	19048	20145	495128	38409	163095	42676	1221	39976	94312	3360	327321	331301	471296	21494	74250	38960	267523	3207	3441	5474	6227	39824	28668	39263	76053	10079
2016-06	pharmacology and toxicology	448	5922		18469	19048	20145	495128	38409	163095	42676	1221	39976	94312	3360	327321	331301	471296	21494	74250	38960	267523	3207	3441	5922	6227	39824	28668	39263	76053	10079
2016-06	physiology	1225	7452		18469	19048	20145	495128	38409	163095	42676	1221	39976	94312	3360	327321	331301	471296	21494	74250	38960	267523	3207	3441	5922	7452	39824	28668	39263	76053	10079
2016-06	plant biology	4096	43920		18469	19048	20145	495128	38409	163095	42676	1221	39976	94312	3360	327321	331301	471296	21494	74250	38960	267523	3207	3441	5922	7452	43920	28668	39263	76053	10079
2016-06	scientific communication and education	3327	31995		18469	19048	20145	495128	38409	163095	42676	1221	39976	94312	3360	327321	331301	471296	21494	74250	38960	267523	3207	3441	5922	7452	43920	31995	39263	76053	10079
2016-06	synthetic biology	4824	44087		18469	19048	20145	495128	38409	163095	42676	1221	39976	94312	3360	327321	331301	471296	21494	74250	38960	267523	3207	3441	5922	7452	43920	31995	44087	76053	10079
2016-06	systems biology	13594	89647		18469	19048	20145	495128	38409	163095	42676	1221	39976	94312	3360	327321	331301	471296	21494	74250	38960	267523	3207	3441	5922	7452	43920	31995	44087	89647	10079
2016-06	zoology	641	10720		18469	19048	20145	495128	38409	163095	42676	1221	39976	94312	3360	327321	331301	471296	21494	74250	38960	267523	3207	3441	5922	7452	43920	31995	44087	89647	10720
2016-07	animal behavior and cognition	2307	20776		20776	19048	20145	495128	38409	163095	42676	1221	39976	94312	3360	327321	331301	471296	21494	74250	38960	267523	3207	3441	5922	7452	43920	31995	44087	89647	10720
2016-07	biochemistry	3162	22210		20776	22210	20145	495128	38409	163095	42676	1221	39976	94312	3360	327321	331301	471296	21494	74250	38960	267523	3207	3441	5922	7452	43920	31995	44087	89647	10720
2016-07	bioengineering	2018	22163		20776	22210	22163	495128	38409	163095	42676	1221	39976	94312	3360	327321	331301	471296	21494	74250	38960	267523	3207	3441	5922	7452	43920	31995	44087	89647	10720
2016-07	bioinformatics	43735	538863		20776	22210	22163	538863	38409	163095	42676	1221	39976	94312	3360	327321	331301	471296	21494	74250	38960	267523	3207	3441	5922	7452	43920	31995	44087	89647	10720
2016-07	biophysics	5168	43577		20776	22210	22163	538863	43577	163095	42676	1221	39976	94312	3360	327321	331301	471296	21494	74250	38960	267523	3207	3441	5922	7452	43920	31995	44087	89647	10720
2016-07	cancer biology	9503	172598		20776	22210	22163	538863	43577	172598	42676	1221	39976	94312	3360	327321	331301	471296	21494	74250	38960	267523	3207	3441	5922	7452	43920	31995	44087	89647	10720
2016-07	cell biology	5310	47986		20776	22210	22163	538863	43577	172598	47986	1221	39976	94312	3360	327321	331301	471296	21494	74250	38960	267523	3207	3441	5922	7452	43920	31995	44087	89647	10720
2016-07	clinical trials	36	1257		20776	22210	22163	538863	43577	172598	47986	1257	39976	94312	3360	327321	331301	471296	21494	74250	38960	267523	3207	3441	5922	7452	43920	31995	44087	89647	10720
2016-07	developmental biology	3320	43296		20776	22210	22163	538863	43577	172598	47986	1257	43296	94312	3360	327321	331301	471296	21494	74250	38960	267523	3207	3441	5922	7452	43920	31995	44087	89647	10720
2016-07	ecology	8977	103289		20776	22210	22163	538863	43577	172598	47986	1257	43296	103289	3360	327321	331301	471296	21494	74250	38960	267523	3207	3441	5922	7452	43920	31995	44087	89647	10720
2016-07	epidemiology	2526	5886		20776	22210	22163	538863	43577	172598	47986	1257	43296	103289	5886	327321	331301	471296	21494	74250	38960	267523	3207	3441	5922	7452	43920	31995	44087	89647	10720
2016-07	evolutionary biology	23313	350634		20776	22210	22163	538863	43577	172598	47986	1257	43296	103289	5886	350634	331301	471296	21494	74250	38960	267523	3207	3441	5922	7452	43920	31995	44087	89647	10720
2016-07	genetics	37272	368573		20776	22210	22163	538863	43577	172598	47986	1257	43296	103289	5886	350634	368573	471296	21494	74250	38960	267523	3207	3441	5922	7452	43920	31995	44087	89647	10720
2016-07	genomics	46806	518102		20776	22210	22163	538863	43577	172598	47986	1257	43296	103289	5886	350634	368573	518102	21494	74250	38960	267523	3207	3441	5922	7452	43920	31995	44087	89647	10720
2016-07	immunology	2449	23943		20776	22210	22163	538863	43577	172598	47986	1257	43296	103289	5886	350634	368573	518102	23943	74250	38960	267523	3207	3441	5922	7452	43920	31995	44087	89647	10720
2016-07	microbiology	8829	83079		20776	22210	22163	538863	43577	172598	47986	1257	43296	103289	5886	350634	368573	518102	23943	83079	38960	267523	3207	3441	5922	7452	43920	31995	44087	89647	10720
2016-07	molecular biology	4508	43468		20776	22210	22163	538863	43577	172598	47986	1257	43296	103289	5886	350634	368573	518102	23943	83079	43468	267523	3207	3441	5922	7452	43920	31995	44087	89647	10720
2016-07	neuroscience	35969	303492		20776	22210	22163	538863	43577	172598	47986	1257	43296	103289	5886	350634	368573	518102	23943	83079	43468	303492	3207	3441	5922	7452	43920	31995	44087	89647	10720
2016-07	paleontology	281	3488		20776	22210	22163	538863	43577	172598	47986	1257	43296	103289	5886	350634	368573	518102	23943	83079	43468	303492	3488	3441	5922	7452	43920	31995	44087	89647	10720
2016-07	pathology	664	4105		20776	22210	22163	538863	43577	172598	47986	1257	43296	103289	5886	350634	368573	518102	23943	83079	43468	303492	3488	4105	5922	7452	43920	31995	44087	89647	10720
2016-07	pharmacology and toxicology	718	6640		20776	22210	22163	538863	43577	172598	47986	1257	43296	103289	5886	350634	368573	518102	23943	83079	43468	303492	3488	4105	6640	7452	43920	31995	44087	89647	10720
2016-07	physiology	847	8299		20776	22210	22163	538863	43577	172598	47986	1257	43296	103289	5886	350634	368573	518102	23943	83079	43468	303492	3488	4105	6640	8299	43920	31995	44087	89647	10720
2016-07	plant biology	4105	48025		20776	22210	22163	538863	43577	172598	47986	1257	43296	103289	5886	350634	368573	518102	23943	83079	43468	303492	3488	4105	6640	8299	48025	31995	44087	89647	10720
2016-07	scientific communication and education	11371	43366		20776	22210	22163	538863	43577	172598	47986	1257	43296	103289	5886	350634	368573	518102	23943	83079	43468	303492	3488	4105	6640	8299	48025	43366	44087	89647	10720
2016-07	synthetic biology	3635	47722		20776	22210	22163	538863	43577	172598	47986	1257	43296	103289	5886	350634	368573	518102	23943	83079	43468	303492	3488	4105	6640	8299	48025	43366	47722	89647	10720
2016-07	systems biology	11577	101224		20776	22210	22163	538863	43577	172598	47986	1257	43296	103289	5886	350634	368573	518102	23943	83079	43468	303492	3488	4105	6640	8299	48025	43366	47722	101224	10720
2016-07	zoology	657	11377		20776	22210	22163	538863	43577	172598	47986	1257	43296	103289	5886	350634	368573	518102	23943	83079	43468	303492	3488	4105	6640	8299	48025	43366	47722	101224	11377
2016-08	animal behavior and cognition	4611	25387		25387	22210	22163	538863	43577	172598	47986	1257	43296	103289	5886	350634	368573	518102	23943	83079	43468	303492	3488	4105	6640	8299	48025	43366	47722	101224	11377
2016-08	biochemistry	3515	25725		25387	25725	22163	538863	43577	172598	47986	1257	43296	103289	5886	350634	368573	518102	23943	83079	43468	303492	3488	4105	6640	8299	48025	43366	47722	101224	11377
2016-08	bioengineering	5109	27272		25387	25725	27272	538863	43577	172598	47986	1257	43296	103289	5886	350634	368573	518102	23943	83079	43468	303492	3488	4105	6640	8299	48025	43366	47722	101224	11377
2016-08	bioinformatics	46046	584909		25387	25725	27272	584909	43577	172598	47986	1257	43296	103289	5886	350634	368573	518102	23943	83079	43468	303492	3488	4105	6640	8299	48025	43366	47722	101224	11377
2016-08	biophysics	6025	49602		25387	25725	27272	584909	49602	172598	47986	1257	43296	103289	5886	350634	368573	518102	23943	83079	43468	303492	3488	4105	6640	8299	48025	43366	47722	101224	11377
2016-08	cancer biology	8557	181155		25387	25725	27272	584909	49602	181155	47986	1257	43296	103289	5886	350634	368573	518102	23943	83079	43468	303492	3488	4105	6640	8299	48025	43366	47722	101224	11377
2016-08	cell biology	5651	53637		25387	25725	27272	584909	49602	181155	53637	1257	43296	103289	5886	350634	368573	518102	23943	83079	43468	303492	3488	4105	6640	8299	48025	43366	47722	101224	11377
2016-08	clinical trials	34	1291		25387	25725	27272	584909	49602	181155	53637	1291	43296	103289	5886	350634	368573	518102	23943	83079	43468	303492	3488	4105	6640	8299	48025	43366	47722	101224	11377
2016-08	developmental biology	4122	47418		25387	25725	27272	584909	49602	181155	53637	1291	47418	103289	5886	350634	368573	518102	23943	83079	43468	303492	3488	4105	6640	8299	48025	43366	47722	101224	11377
2016-08	ecology	10618	113907		25387	25725	27272	584909	49602	181155	53637	1291	47418	113907	5886	350634	368573	518102	23943	83079	43468	303492	3488	4105	6640	8299	48025	43366	47722	101224	11377
2016-08	epidemiology	3341	9227		25387	25725	27272	584909	49602	181155	53637	1291	47418	113907	9227	350634	368573	518102	23943	83079	43468	303492	3488	4105	6640	8299	48025	43366	47722	101224	11377
2016-08	evolutionary biology	27897	378531		25387	25725	27272	584909	49602	181155	53637	1291	47418	113907	9227	378531	368573	518102	23943	83079	43468	303492	3488	4105	6640	8299	48025	43366	47722	101224	11377
2016-08	genetics	26532	395105		25387	25725	27272	584909	49602	181155	53637	1291	47418	113907	9227	378531	395105	518102	23943	83079	43468	303492	3488	4105	6640	8299	48025	43366	47722	101224	11377
2016-08	genomics	49694	567796		25387	25725	27272	584909	49602	181155	53637	1291	47418	113907	9227	378531	395105	567796	23943	83079	43468	303492	3488	4105	6640	8299	48025	43366	47722	101224	11377
2016-08	immunology	2356	26299		25387	25725	27272	584909	49602	181155	53637	1291	47418	113907	9227	378531	395105	567796	26299	83079	43468	303492	3488	4105	6640	8299	48025	43366	47722	101224	11377
2016-08	microbiology	10822	93901		25387	25725	27272	584909	49602	181155	53637	1291	47418	113907	9227	378531	395105	567796	26299	93901	43468	303492	3488	4105	6640	8299	48025	43366	47722	101224	11377
2016-08	molecular biology	5935	49403		25387	25725	27272	584909	49602	181155	53637	1291	47418	113907	9227	378531	395105	567796	26299	93901	49403	303492	3488	4105	6640	8299	48025	43366	47722	101224	11377
2016-08	neuroscience	36213	339705		25387	25725	27272	584909	49602	181155	53637	1291	47418	113907	9227	378531	395105	567796	26299	93901	49403	339705	3488	4105	6640	8299	48025	43366	47722	101224	11377
2016-08	paleontology	222	3710		25387	25725	27272	584909	49602	181155	53637	1291	47418	113907	9227	378531	395105	567796	26299	93901	49403	339705	3710	4105	6640	8299	48025	43366	47722	101224	11377
2016-08	pathology	534	4639		25387	25725	27272	584909	49602	181155	53637	1291	47418	113907	9227	378531	395105	567796	26299	93901	49403	339705	3710	4639	6640	8299	48025	43366	47722	101224	11377
2016-08	pharmacology and toxicology	849	7489		25387	25725	27272	584909	49602	181155	53637	1291	47418	113907	9227	378531	395105	567796	26299	93901	49403	339705	3710	4639	7489	8299	48025	43366	47722	101224	11377
2016-08	physiology	840	9139		25387	25725	27272	584909	49602	181155	53637	1291	47418	113907	9227	378531	395105	567796	26299	93901	49403	339705	3710	4639	7489	9139	48025	43366	47722	101224	11377
2016-08	plant biology	4713	52738		25387	25725	27272	584909	49602	181155	53637	1291	47418	113907	9227	378531	395105	567796	26299	93901	49403	339705	3710	4639	7489	9139	52738	43366	47722	101224	11377
2016-08	scientific communication and education	3792	47158		25387	25725	27272	584909	49602	181155	53637	1291	47418	113907	9227	378531	395105	567796	26299	93901	49403	339705	3710	4639	7489	9139	52738	47158	47722	101224	11377
2016-08	synthetic biology	4754	52476		25387	25725	27272	584909	49602	181155	53637	1291	47418	113907	9227	378531	395105	567796	26299	93901	49403	339705	3710	4639	7489	9139	52738	47158	52476	101224	11377
2016-08	systems biology	9827	111051		25387	25725	27272	584909	49602	181155	53637	1291	47418	113907	9227	378531	395105	567796	26299	93901	49403	339705	3710	4639	7489	9139	52738	47158	52476	111051	11377
2016-08	zoology	724	12101		25387	25725	27272	584909	49602	181155	53637	1291	47418	113907	9227	378531	395105	567796	26299	93901	49403	339705	3710	4639	7489	9139	52738	47158	52476	111051	12101
2016-09	animal behavior and cognition	2624	28011		28011	25725	27272	584909	49602	181155	53637	1291	47418	113907	9227	378531	395105	567796	26299	93901	49403	339705	3710	4639	7489	9139	52738	47158	52476	111051	12101
2016-09	biochemistry	2948	28673		28011	28673	27272	584909	49602	181155	53637	1291	47418	113907	9227	378531	395105	567796	26299	93901	49403	339705	3710	4639	7489	9139	52738	47158	52476	111051	12101
2016-09	bioengineering	8744	36016		28011	28673	36016	584909	49602	181155	53637	1291	47418	113907	9227	378531	395105	567796	26299	93901	49403	339705	3710	4639	7489	9139	52738	47158	52476	111051	12101
2016-09	bioinformatics	47168	632077		28011	28673	36016	632077	49602	181155	53637	1291	47418	113907	9227	378531	395105	567796	26299	93901	49403	339705	3710	4639	7489	9139	52738	47158	52476	111051	12101
2016-09	biophysics	6972	56574		28011	28673	36016	632077	56574	181155	53637	1291	47418	113907	9227	378531	395105	567796	26299	93901	49403	339705	3710	4639	7489	9139	52738	47158	52476	111051	12101
2016-09	cancer biology	8128	189283		28011	28673	36016	632077	56574	189283	53637	1291	47418	113907	9227	378531	395105	567796	26299	93901	49403	339705	3710	4639	7489	9139	52738	47158	52476	111051	12101
2016-09	cell biology	5057	58694		28011	28673	36016	632077	56574	189283	58694	1291	47418	113907	9227	378531	395105	567796	26299	93901	49403	339705	3710	4639	7489	9139	52738	47158	52476	111051	12101
2016-09	clinical trials	28	1319		28011	28673	36016	632077	56574	189283	58694	1319	47418	113907	9227	378531	395105	567796	26299	93901	49403	339705	3710	4639	7489	9139	52738	47158	52476	111051	12101
2016-09	developmental biology	3103	50521		28011	28673	36016	632077	56574	189283	58694	1319	50521	113907	9227	378531	395105	567796	26299	93901	49403	339705	3710	4639	7489	9139	52738	47158	52476	111051	12101
2016-09	ecology	9773	123680		28011	28673	36016	632077	56574	189283	58694	1319	50521	123680	9227	378531	395105	567796	26299	93901	49403	339705	3710	4639	7489	9139	52738	47158	52476	111051	12101
2016-09	epidemiology	4700	13927		28011	28673	36016	632077	56574	189283	58694	1319	50521	123680	13927	378531	395105	567796	26299	93901	49403	339705	3710	4639	7489	9139	52738	47158	52476	111051	12101
2016-09	evolutionary biology	26473	405004		28011	28673	36016	632077	56574	189283	58694	1319	50521	123680	13927	405004	395105	567796	26299	93901	49403	339705	3710	4639	7489	9139	52738	47158	52476	111051	12101
2016-09	genetics	27062	422167		28011	28673	36016	632077	56574	189283	58694	1319	50521	123680	13927	405004	422167	567796	26299	93901	49403	339705	3710	4639	7489	9139	52738	47158	52476	111051	12101
2016-09	genomics	46510	614306		28011	28673	36016	632077	56574	189283	58694	1319	50521	123680	13927	405004	422167	614306	26299	93901	49403	339705	3710	4639	7489	9139	52738	47158	52476	111051	12101
2016-09	immunology	2086	28385		28011	28673	36016	632077	56574	189283	58694	1319	50521	123680	13927	405004	422167	614306	28385	93901	49403	339705	3710	4639	7489	9139	52738	47158	52476	111051	12101
2016-09	microbiology	11277	105178		28011	28673	36016	632077	56574	189283	58694	1319	50521	123680	13927	405004	422167	614306	28385	105178	49403	339705	3710	4639	7489	9139	52738	47158	52476	111051	12101
2016-09	molecular biology	5581	54984		28011	28673	36016	632077	56574	189283	58694	1319	50521	123680	13927	405004	422167	614306	28385	105178	54984	339705	3710	4639	7489	9139	52738	47158	52476	111051	12101
2016-09	neuroscience	34027	373732		28011	28673	36016	632077	56574	189283	58694	1319	50521	123680	13927	405004	422167	614306	28385	105178	54984	373732	3710	4639	7489	9139	52738	47158	52476	111051	12101
2016-09	paleontology	686	4396		28011	28673	36016	632077	56574	189283	58694	1319	50521	123680	13927	405004	422167	614306	28385	105178	54984	373732	4396	4639	7489	9139	52738	47158	52476	111051	12101
2016-09	pathology	515	5154		28011	28673	36016	632077	56574	189283	58694	1319	50521	123680	13927	405004	422167	614306	28385	105178	54984	373732	4396	5154	7489	9139	52738	47158	52476	111051	12101
2016-09	pharmacology and toxicology	901	8390		28011	28673	36016	632077	56574	189283	58694	1319	50521	123680	13927	405004	422167	614306	28385	105178	54984	373732	4396	5154	8390	9139	52738	47158	52476	111051	12101
2016-09	physiology	2179	11318		28011	28673	36016	632077	56574	189283	58694	1319	50521	123680	13927	405004	422167	614306	28385	105178	54984	373732	4396	5154	8390	11318	52738	47158	52476	111051	12101
2016-09	plant biology	4676	57414		28011	28673	36016	632077	56574	189283	58694	1319	50521	123680	13927	405004	422167	614306	28385	105178	54984	373732	4396	5154	8390	11318	57414	47158	52476	111051	12101
2016-09	scientific communication and education	3154	50312		28011	28673	36016	632077	56574	189283	58694	1319	50521	123680	13927	405004	422167	614306	28385	105178	54984	373732	4396	5154	8390	11318	57414	50312	52476	111051	12101
2016-09	synthetic biology	4647	57123		28011	28673	36016	632077	56574	189283	58694	1319	50521	123680	13927	405004	422167	614306	28385	105178	54984	373732	4396	5154	8390	11318	57414	50312	57123	111051	12101
2016-09	systems biology	9737	120788		28011	28673	36016	632077	56574	189283	58694	1319	50521	123680	13927	405004	422167	614306	28385	105178	54984	373732	4396	5154	8390	11318	57414	50312	57123	120788	12101
2016-09	zoology	720	12821		28011	28673	36016	632077	56574	189283	58694	1319	50521	123680	13927	405004	422167	614306	28385	105178	54984	373732	4396	5154	8390	11318	57414	50312	57123	120788	12821
2016-10	animal behavior and cognition	2651	30662		30662	28673	36016	632077	56574	189283	58694	1319	50521	123680	13927	405004	422167	614306	28385	105178	54984	373732	4396	5154	8390	11318	57414	50312	57123	120788	12821
2016-10	biochemistry	3308	31981		30662	31981	36016	632077	56574	189283	58694	1319	50521	123680	13927	405004	422167	614306	28385	105178	54984	373732	4396	5154	8390	11318	57414	50312	57123	120788	12821
2016-10	bioengineering	2652	38668		30662	31981	38668	632077	56574	189283	58694	1319	50521	123680	13927	405004	422167	614306	28385	105178	54984	373732	4396	5154	8390	11318	57414	50312	57123	120788	12821
2016-10	bioinformatics	53040	685117		30662	31981	38668	685117	56574	189283	58694	1319	50521	123680	13927	405004	422167	614306	28385	105178	54984	373732	4396	5154	8390	11318	57414	50312	57123	120788	12821
2016-10	biophysics	6910	63484		30662	31981	38668	685117	63484	189283	58694	1319	50521	123680	13927	405004	422167	614306	28385	105178	54984	373732	4396	5154	8390	11318	57414	50312	57123	120788	12821
2016-10	cancer biology	8850	198133		30662	31981	38668	685117	63484	198133	58694	1319	50521	123680	13927	405004	422167	614306	28385	105178	54984	373732	4396	5154	8390	11318	57414	50312	57123	120788	12821
2016-10	cell biology	6241	64935		30662	31981	38668	685117	63484	198133	64935	1319	50521	123680	13927	405004	422167	614306	28385	105178	54984	373732	4396	5154	8390	11318	57414	50312	57123	120788	12821
2016-10	clinical trials	15	1334		30662	31981	38668	685117	63484	198133	64935	1334	50521	123680	13927	405004	422167	614306	28385	105178	54984	373732	4396	5154	8390	11318	57414	50312	57123	120788	12821
2016-10	developmental biology	3135	53656		30662	31981	38668	685117	63484	198133	64935	1334	53656	123680	13927	405004	422167	614306	28385	105178	54984	373732	4396	5154	8390	11318	57414	50312	57123	120788	12821
2016-10	ecology	10703	134383		30662	31981	38668	685117	63484	198133	64935	1334	53656	134383	13927	405004	422167	614306	28385	105178	54984	373732	4396	5154	8390	11318	57414	50312	57123	120788	12821
2016-10	epidemiology	4043	17970		30662	31981	38668	685117	63484	198133	64935	1334	53656	134383	17970	405004	422167	614306	28385	105178	54984	373732	4396	5154	8390	11318	57414	50312	57123	120788	12821
2016-10	evolutionary biology	24859	429863		30662	31981	38668	685117	63484	198133	64935	1334	53656	134383	17970	429863	422167	614306	28385	105178	54984	373732	4396	5154	8390	11318	57414	50312	57123	120788	12821
2016-10	genetics	26841	449008		30662	31981	38668	685117	63484	198133	64935	1334	53656	134383	17970	429863	449008	614306	28385	105178	54984	373732	4396	5154	8390	11318	57414	50312	57123	120788	12821
2016-10	genomics	49057	663363		30662	31981	38668	685117	63484	198133	64935	1334	53656	134383	17970	429863	449008	663363	28385	105178	54984	373732	4396	5154	8390	11318	57414	50312	57123	120788	12821
2016-10	immunology	2068	30453		30662	31981	38668	685117	63484	198133	64935	1334	53656	134383	17970	429863	449008	663363	30453	105178	54984	373732	4396	5154	8390	11318	57414	50312	57123	120788	12821
2016-10	microbiology	12003	117181		30662	31981	38668	685117	63484	198133	64935	1334	53656	134383	17970	429863	449008	663363	30453	117181	54984	373732	4396	5154	8390	11318	57414	50312	57123	120788	12821
2016-10	molecular biology	6367	61351		30662	31981	38668	685117	63484	198133	64935	1334	53656	134383	17970	429863	449008	663363	30453	117181	61351	373732	4396	5154	8390	11318	57414	50312	57123	120788	12821
2016-10	neuroscience	40674	414406		30662	31981	38668	685117	63484	198133	64935	1334	53656	134383	17970	429863	449008	663363	30453	117181	61351	414406	4396	5154	8390	11318	57414	50312	57123	120788	12821
2016-10	paleontology	230	4626		30662	31981	38668	685117	63484	198133	64935	1334	53656	134383	17970	429863	449008	663363	30453	117181	61351	414406	4626	5154	8390	11318	57414	50312	57123	120788	12821
2016-10	pathology	513	5667		30662	31981	38668	685117	63484	198133	64935	1334	53656	134383	17970	429863	449008	663363	30453	117181	61351	414406	4626	5667	8390	11318	57414	50312	57123	120788	12821
2016-10	pharmacology and toxicology	966	9356		30662	31981	38668	685117	63484	198133	64935	1334	53656	134383	17970	429863	449008	663363	30453	117181	61351	414406	4626	5667	9356	11318	57414	50312	57123	120788	12821
2016-10	physiology	1649	12967		30662	31981	38668	685117	63484	198133	64935	1334	53656	134383	17970	429863	449008	663363	30453	117181	61351	414406	4626	5667	9356	12967	57414	50312	57123	120788	12821
2016-10	plant biology	5139	62553		30662	31981	38668	685117	63484	198133	64935	1334	53656	134383	17970	429863	449008	663363	30453	117181	61351	414406	4626	5667	9356	12967	62553	50312	57123	120788	12821
2016-10	scientific communication and education	2852	53164		30662	31981	38668	685117	63484	198133	64935	1334	53656	134383	17970	429863	449008	663363	30453	117181	61351	414406	4626	5667	9356	12967	62553	53164	57123	120788	12821
2016-10	synthetic biology	4844	61967		30662	31981	38668	685117	63484	198133	64935	1334	53656	134383	17970	429863	449008	663363	30453	117181	61351	414406	4626	5667	9356	12967	62553	53164	61967	120788	12821
2016-10	systems biology	11468	132256		30662	31981	38668	685117	63484	198133	64935	1334	53656	134383	17970	429863	449008	663363	30453	117181	61351	414406	4626	5667	9356	12967	62553	53164	61967	132256	12821
2016-10	zoology	809	13630		30662	31981	38668	685117	63484	198133	64935	1334	53656	134383	17970	429863	449008	663363	30453	117181	61351	414406	4626	5667	9356	12967	62553	53164	61967	132256	13630
2016-11	animal behavior and cognition	3186	33848		33848	31981	38668	685117	63484	198133	64935	1334	53656	134383	17970	429863	449008	663363	30453	117181	61351	414406	4626	5667	9356	12967	62553	53164	61967	132256	13630
2016-11	biochemistry	3781	35762		33848	35762	38668	685117	63484	198133	64935	1334	53656	134383	17970	429863	449008	663363	30453	117181	61351	414406	4626	5667	9356	12967	62553	53164	61967	132256	13630
2016-11	bioengineering	2273	40941		33848	35762	40941	685117	63484	198133	64935	1334	53656	134383	17970	429863	449008	663363	30453	117181	61351	414406	4626	5667	9356	12967	62553	53164	61967	132256	13630
2016-11	bioinformatics	59613	744730		33848	35762	40941	744730	63484	198133	64935	1334	53656	134383	17970	429863	449008	663363	30453	117181	61351	414406	4626	5667	9356	12967	62553	53164	61967	132256	13630
2016-11	biophysics	9402	72886		33848	35762	40941	744730	72886	198133	64935	1334	53656	134383	17970	429863	449008	663363	30453	117181	61351	414406	4626	5667	9356	12967	62553	53164	61967	132256	13630
2016-11	cancer biology	18204	216337		33848	35762	40941	744730	72886	216337	64935	1334	53656	134383	17970	429863	449008	663363	30453	117181	61351	414406	4626	5667	9356	12967	62553	53164	61967	132256	13630
2016-11	cell biology	5770	70705		33848	35762	40941	744730	72886	216337	70705	1334	53656	134383	17970	429863	449008	663363	30453	117181	61351	414406	4626	5667	9356	12967	62553	53164	61967	132256	13630
2016-11	clinical trials	136	1470		33848	35762	40941	744730	72886	216337	70705	1470	53656	134383	17970	429863	449008	663363	30453	117181	61351	414406	4626	5667	9356	12967	62553	53164	61967	132256	13630
2016-11	developmental biology	2863	56519		33848	35762	40941	744730	72886	216337	70705	1470	56519	134383	17970	429863	449008	663363	30453	117181	61351	414406	4626	5667	9356	12967	62553	53164	61967	132256	13630
2016-11	ecology	11743	146126		33848	35762	40941	744730	72886	216337	70705	1470	56519	146126	17970	429863	449008	663363	30453	117181	61351	414406	4626	5667	9356	12967	62553	53164	61967	132256	13630
2016-11	epidemiology	3917	21887		33848	35762	40941	744730	72886	216337	70705	1470	56519	146126	21887	429863	449008	663363	30453	117181	61351	414406	4626	5667	9356	12967	62553	53164	61967	132256	13630
2016-11	evolutionary biology	28345	458208		33848	35762	40941	744730	72886	216337	70705	1470	56519	146126	21887	458208	449008	663363	30453	117181	61351	414406	4626	5667	9356	12967	62553	53164	61967	132256	13630
2016-11	genetics	25241	474249		33848	35762	40941	744730	72886	216337	70705	1470	56519	146126	21887	458208	474249	663363	30453	117181	61351	414406	4626	5667	9356	12967	62553	53164	61967	132256	13630
2016-11	genomics	46553	709916		33848	35762	40941	744730	72886	216337	70705	1470	56519	146126	21887	458208	474249	709916	30453	117181	61351	414406	4626	5667	9356	12967	62553	53164	61967	132256	13630
2016-11	immunology	2126	32579		33848	35762	40941	744730	72886	216337	70705	1470	56519	146126	21887	458208	474249	709916	32579	117181	61351	414406	4626	5667	9356	12967	62553	53164	61967	132256	13630
2016-11	microbiology	14095	131276		33848	35762	40941	744730	72886	216337	70705	1470	56519	146126	21887	458208	474249	709916	32579	131276	61351	414406	4626	5667	9356	12967	62553	53164	61967	132256	13630
2016-11	molecular biology	5176	66527		33848	35762	40941	744730	72886	216337	70705	1470	56519	146126	21887	458208	474249	709916	32579	131276	66527	414406	4626	5667	9356	12967	62553	53164	61967	132256	13630
2016-11	neuroscience	45879	460285		33848	35762	40941	744730	72886	216337	70705	1470	56519	146126	21887	458208	474249	709916	32579	131276	66527	460285	4626	5667	9356	12967	62553	53164	61967	132256	13630
2016-11	paleontology	216	4842		33848	35762	40941	744730	72886	216337	70705	1470	56519	146126	21887	458208	474249	709916	32579	131276	66527	460285	4842	5667	9356	12967	62553	53164	61967	132256	13630
2016-11	pathology	428	6095		33848	35762	40941	744730	72886	216337	70705	1470	56519	146126	21887	458208	474249	709916	32579	131276	66527	460285	4842	6095	9356	12967	62553	53164	61967	132256	13630
2016-11	pharmacology and toxicology	866	10222		33848	35762	40941	744730	72886	216337	70705	1470	56519	146126	21887	458208	474249	709916	32579	131276	66527	460285	4842	6095	10222	12967	62553	53164	61967	132256	13630
2016-11	physiology	1882	14849		33848	35762	40941	744730	72886	216337	70705	1470	56519	146126	21887	458208	474249	709916	32579	131276	66527	460285	4842	6095	10222	14849	62553	53164	61967	132256	13630
2016-11	plant biology	5740	68293		33848	35762	40941	744730	72886	216337	70705	1470	56519	146126	21887	458208	474249	709916	32579	131276	66527	460285	4842	6095	10222	14849	68293	53164	61967	132256	13630
2016-11	scientific communication and education	13312	66476		33848	35762	40941	744730	72886	216337	70705	1470	56519	146126	21887	458208	474249	709916	32579	131276	66527	460285	4842	6095	10222	14849	68293	66476	61967	132256	13630
2016-11	synthetic biology	4905	66872		33848	35762	40941	744730	72886	216337	70705	1470	56519	146126	21887	458208	474249	709916	32579	131276	66527	460285	4842	6095	10222	14849	68293	66476	66872	132256	13630
2016-11	systems biology	9285	141541		33848	35762	40941	744730	72886	216337	70705	1470	56519	146126	21887	458208	474249	709916	32579	131276	66527	460285	4842	6095	10222	14849	68293	66476	66872	141541	13630
2016-11	zoology	1089	14719		33848	35762	40941	744730	72886	216337	70705	1470	56519	146126	21887	458208	474249	709916	32579	131276	66527	460285	4842	6095	10222	14849	68293	66476	66872	141541	14719
2016-12	animal behavior and cognition	3357	37205		37205	35762	40941	744730	72886	216337	70705	1470	56519	146126	21887	458208	474249	709916	32579	131276	66527	460285	4842	6095	10222	14849	68293	66476	66872	141541	14719
2016-12	biochemistry	4124	39886		37205	39886	40941	744730	72886	216337	70705	1470	56519	146126	21887	458208	474249	709916	32579	131276	66527	460285	4842	6095	10222	14849	68293	66476	66872	141541	14719
2016-12	bioengineering	2130	43071		37205	39886	43071	744730	72886	216337	70705	1470	56519	146126	21887	458208	474249	709916	32579	131276	66527	460285	4842	6095	10222	14849	68293	66476	66872	141541	14719
2016-12	bioinformatics	48011	792741		37205	39886	43071	792741	72886	216337	70705	1470	56519	146126	21887	458208	474249	709916	32579	131276	66527	460285	4842	6095	10222	14849	68293	66476	66872	141541	14719
2016-12	biophysics	7550	80436		37205	39886	43071	792741	80436	216337	70705	1470	56519	146126	21887	458208	474249	709916	32579	131276	66527	460285	4842	6095	10222	14849	68293	66476	66872	141541	14719
2016-12	cancer biology	9107	225444		37205	39886	43071	792741	80436	225444	70705	1470	56519	146126	21887	458208	474249	709916	32579	131276	66527	460285	4842	6095	10222	14849	68293	66476	66872	141541	14719
2016-12	cell biology	6199	76904		37205	39886	43071	792741	80436	225444	76904	1470	56519	146126	21887	458208	474249	709916	32579	131276	66527	460285	4842	6095	10222	14849	68293	66476	66872	141541	14719
2016-12	clinical trials	61	1531		37205	39886	43071	792741	80436	225444	76904	1531	56519	146126	21887	458208	474249	709916	32579	131276	66527	460285	4842	6095	10222	14849	68293	66476	66872	141541	14719
2016-12	developmental biology	3569	60088		37205	39886	43071	792741	80436	225444	76904	1531	60088	146126	21887	458208	474249	709916	32579	131276	66527	460285	4842	6095	10222	14849	68293	66476	66872	141541	14719
2016-12	ecology	8286	154412		37205	39886	43071	792741	80436	225444	76904	1531	60088	154412	21887	458208	474249	709916	32579	131276	66527	460285	4842	6095	10222	14849	68293	66476	66872	141541	14719
2016-12	epidemiology	2933	24820		37205	39886	43071	792741	80436	225444	76904	1531	60088	154412	24820	458208	474249	709916	32579	131276	66527	460285	4842	6095	10222	14849	68293	66476	66872	141541	14719
2016-12	evolutionary biology	23940	482148		37205	39886	43071	792741	80436	225444	76904	1531	60088	154412	24820	482148	474249	709916	32579	131276	66527	460285	4842	6095	10222	14849	68293	66476	66872	141541	14719
2016-12	genetics	23921	498170		37205	39886	43071	792741	80436	225444	76904	1531	60088	154412	24820	482148	498170	709916	32579	131276	66527	460285	4842	6095	10222	14849	68293	66476	66872	141541	14719
2016-12	genomics	46886	756802		37205	39886	43071	792741	80436	225444	76904	1531	60088	154412	24820	482148	498170	756802	32579	131276	66527	460285	4842	6095	10222	14849	68293	66476	66872	141541	14719
2016-12	immunology	1951	34530		37205	39886	43071	792741	80436	225444	76904	1531	60088	154412	24820	482148	498170	756802	34530	131276	66527	460285	4842	6095	10222	14849	68293	66476	66872	141541	14719
2016-12	microbiology	13773	145049		37205	39886	43071	792741	80436	225444	76904	1531	60088	154412	24820	482148	498170	756802	34530	145049	66527	460285	4842	6095	10222	14849	68293	66476	66872	141541	14719
2016-12	molecular biology	8128	74655		37205	39886	43071	792741	80436	225444	76904	1531	60088	154412	24820	482148	498170	756802	34530	145049	74655	460285	4842	6095	10222	14849	68293	66476	66872	141541	14719
2016-12	neuroscience	41225	501510		37205	39886	43071	792741	80436	225444	76904	1531	60088	154412	24820	482148	498170	756802	34530	145049	74655	501510	4842	6095	10222	14849	68293	66476	66872	141541	14719
2016-12	paleontology	149	4991		37205	39886	43071	792741	80436	225444	76904	1531	60088	154412	24820	482148	498170	756802	34530	145049	74655	501510	4991	6095	10222	14849	68293	66476	66872	141541	14719
2016-12	pathology	402	6497		37205	39886	43071	792741	80436	225444	76904	1531	60088	154412	24820	482148	498170	756802	34530	145049	74655	501510	4991	6497	10222	14849	68293	66476	66872	141541	14719
2016-12	pharmacology and toxicology	948	11170		37205	39886	43071	792741	80436	225444	76904	1531	60088	154412	24820	482148	498170	756802	34530	145049	74655	501510	4991	6497	11170	14849	68293	66476	66872	141541	14719
2016-12	physiology	870	15719		37205	39886	43071	792741	80436	225444	76904	1531	60088	154412	24820	482148	498170	756802	34530	145049	74655	501510	4991	6497	11170	15719	68293	66476	66872	141541	14719
2016-12	plant biology	4866	73159		37205	39886	43071	792741	80436	225444	76904	1531	60088	154412	24820	482148	498170	756802	34530	145049	74655	501510	4991	6497	11170	15719	73159	66476	66872	141541	14719
2016-12	scientific communication and education	24571	91047		37205	39886	43071	792741	80436	225444	76904	1531	60088	154412	24820	482148	498170	756802	34530	145049	74655	501510	4991	6497	11170	15719	73159	91047	66872	141541	14719
2016-12	synthetic biology	4772	71644		37205	39886	43071	792741	80436	225444	76904	1531	60088	154412	24820	482148	498170	756802	34530	145049	74655	501510	4991	6497	11170	15719	73159	91047	71644	141541	14719
2016-12	systems biology	9304	150845		37205	39886	43071	792741	80436	225444	76904	1531	60088	154412	24820	482148	498170	756802	34530	145049	74655	501510	4991	6497	11170	15719	73159	91047	71644	150845	14719
2016-12	zoology	984	15703		37205	39886	43071	792741	80436	225444	76904	1531	60088	154412	24820	482148	498170	756802	34530	145049	74655	501510	4991	6497	11170	15719	73159	91047	71644	150845	15703
2017-01	animal behavior and cognition	2736	39941		39941	39886	43071	792741	80436	225444	76904	1531	60088	154412	24820	482148	498170	756802	34530	145049	74655	501510	4991	6497	11170	15719	73159	91047	71644	150845	15703
2017-01	biochemistry	6472	46358		39941	46358	43071	792741	80436	225444	76904	1531	60088	154412	24820	482148	498170	756802	34530	145049	74655	501510	4991	6497	11170	15719	73159	91047	71644	150845	15703
2017-01	bioengineering	3714	46785		39941	46358	46785	792741	80436	225444	76904	1531	60088	154412	24820	482148	498170	756802	34530	145049	74655	501510	4991	6497	11170	15719	73159	91047	71644	150845	15703
2017-01	bioinformatics	54344	847085		39941	46358	46785	847085	80436	225444	76904	1531	60088	154412	24820	482148	498170	756802	34530	145049	74655	501510	4991	6497	11170	15719	73159	91047	71644	150845	15703
2017-01	biophysics	9110	89546		39941	46358	46785	847085	89546	225444	76904	1531	60088	154412	24820	482148	498170	756802	34530	145049	74655	501510	4991	6497	11170	15719	73159	91047	71644	150845	15703
2017-01	cancer biology	9544	234988		39941	46358	46785	847085	89546	234988	76904	1531	60088	154412	24820	482148	498170	756802	34530	145049	74655	501510	4991	6497	11170	15719	73159	91047	71644	150845	15703
2017-01	cell biology	6694	83598		39941	46358	46785	847085	89546	234988	83598	1531	60088	154412	24820	482148	498170	756802	34530	145049	74655	501510	4991	6497	11170	15719	73159	91047	71644	150845	15703
2017-01	clinical trials	115	1646		39941	46358	46785	847085	89546	234988	83598	1646	60088	154412	24820	482148	498170	756802	34530	145049	74655	501510	4991	6497	11170	15719	73159	91047	71644	150845	15703
2017-01	developmental biology	4970	65058		39941	46358	46785	847085	89546	234988	83598	1646	65058	154412	24820	482148	498170	756802	34530	145049	74655	501510	4991	6497	11170	15719	73159	91047	71644	150845	15703
2017-01	ecology	9025	163437		39941	46358	46785	847085	89546	234988	83598	1646	65058	163437	24820	482148	498170	756802	34530	145049	74655	501510	4991	6497	11170	15719	73159	91047	71644	150845	15703
2017-01	epidemiology	3890	28710		39941	46358	46785	847085	89546	234988	83598	1646	65058	163437	28710	482148	498170	756802	34530	145049	74655	501510	4991	6497	11170	15719	73159	91047	71644	150845	15703
2017-01	evolutionary biology	22275	504423		39941	46358	46785	847085	89546	234988	83598	1646	65058	163437	28710	504423	498170	756802	34530	145049	74655	501510	4991	6497	11170	15719	73159	91047	71644	150845	15703
2017-01	genetics	24370	522540		39941	46358	46785	847085	89546	234988	83598	1646	65058	163437	28710	504423	522540	756802	34530	145049	74655	501510	4991	6497	11170	15719	73159	91047	71644	150845	15703
2017-01	genomics	53120	809922		39941	46358	46785	847085	89546	234988	83598	1646	65058	163437	28710	504423	522540	809922	34530	145049	74655	501510	4991	6497	11170	15719	73159	91047	71644	150845	15703
2017-01	immunology	2107	36637		39941	46358	46785	847085	89546	234988	83598	1646	65058	163437	28710	504423	522540	809922	36637	145049	74655	501510	4991	6497	11170	15719	73159	91047	71644	150845	15703
2017-01	microbiology	15537	160586		39941	46358	46785	847085	89546	234988	83598	1646	65058	163437	28710	504423	522540	809922	36637	160586	74655	501510	4991	6497	11170	15719	73159	91047	71644	150845	15703
2017-01	molecular biology	6996	81651		39941	46358	46785	847085	89546	234988	83598	1646	65058	163437	28710	504423	522540	809922	36637	160586	81651	501510	4991	6497	11170	15719	73159	91047	71644	150845	15703
2017-01	neuroscience	50467	551977		39941	46358	46785	847085	89546	234988	83598	1646	65058	163437	28710	504423	522540	809922	36637	160586	81651	551977	4991	6497	11170	15719	73159	91047	71644	150845	15703
2017-01	paleontology	170	5161		39941	46358	46785	847085	89546	234988	83598	1646	65058	163437	28710	504423	522540	809922	36637	160586	81651	551977	5161	6497	11170	15719	73159	91047	71644	150845	15703
2017-01	pathology	485	6982		39941	46358	46785	847085	89546	234988	83598	1646	65058	163437	28710	504423	522540	809922	36637	160586	81651	551977	5161	6982	11170	15719	73159	91047	71644	150845	15703
2017-01	pharmacology and toxicology	1978	13148		39941	46358	46785	847085	89546	234988	83598	1646	65058	163437	28710	504423	522540	809922	36637	160586	81651	551977	5161	6982	13148	15719	73159	91047	71644	150845	15703
2017-01	physiology	808	16527		39941	46358	46785	847085	89546	234988	83598	1646	65058	163437	28710	504423	522540	809922	36637	160586	81651	551977	5161	6982	13148	16527	73159	91047	71644	150845	15703
2017-01	plant biology	5422	78581		39941	46358	46785	847085	89546	234988	83598	1646	65058	163437	28710	504423	522540	809922	36637	160586	81651	551977	5161	6982	13148	16527	78581	91047	71644	150845	15703
2017-01	scientific communication and education	9760	100807		39941	46358	46785	847085	89546	234988	83598	1646	65058	163437	28710	504423	522540	809922	36637	160586	81651	551977	5161	6982	13148	16527	78581	100807	71644	150845	15703
2017-01	synthetic biology	4069	75713		39941	46358	46785	847085	89546	234988	83598	1646	65058	163437	28710	504423	522540	809922	36637	160586	81651	551977	5161	6982	13148	16527	78581	100807	75713	150845	15703
2017-01	systems biology	10268	161113		39941	46358	46785	847085	89546	234988	83598	1646	65058	163437	28710	504423	522540	809922	36637	160586	81651	551977	5161	6982	13148	16527	78581	100807	75713	161113	15703
2017-01	zoology	1061	16764		39941	46358	46785	847085	89546	234988	83598	1646	65058	163437	28710	504423	522540	809922	36637	160586	81651	551977	5161	6982	13148	16527	78581	100807	75713	161113	16764
2017-02	animal behavior and cognition	3208	43149		43149	46358	46785	847085	89546	234988	83598	1646	65058	163437	28710	504423	522540	809922	36637	160586	81651	551977	5161	6982	13148	16527	78581	100807	75713	161113	16764
2017-02	biochemistry	5139	51497		43149	51497	46785	847085	89546	234988	83598	1646	65058	163437	28710	504423	522540	809922	36637	160586	81651	551977	5161	6982	13148	16527	78581	100807	75713	161113	16764
2017-02	bioengineering	3894	50679		43149	51497	50679	847085	89546	234988	83598	1646	65058	163437	28710	504423	522540	809922	36637	160586	81651	551977	5161	6982	13148	16527	78581	100807	75713	161113	16764
2017-02	bioinformatics	54828	901913		43149	51497	50679	901913	89546	234988	83598	1646	65058	163437	28710	504423	522540	809922	36637	160586	81651	551977	5161	6982	13148	16527	78581	100807	75713	161113	16764
2017-02	biophysics	8712	98258		43149	51497	50679	901913	98258	234988	83598	1646	65058	163437	28710	504423	522540	809922	36637	160586	81651	551977	5161	6982	13148	16527	78581	100807	75713	161113	16764
2017-02	cancer biology	8230	243218		43149	51497	50679	901913	98258	243218	83598	1646	65058	163437	28710	504423	522540	809922	36637	160586	81651	551977	5161	6982	13148	16527	78581	100807	75713	161113	16764
2017-02	cell biology	7391	90989		43149	51497	50679	901913	98258	243218	90989	1646	65058	163437	28710	504423	522540	809922	36637	160586	81651	551977	5161	6982	13148	16527	78581	100807	75713	161113	16764
2017-02	clinical trials	288	1934		43149	51497	50679	901913	98258	243218	90989	1934	65058	163437	28710	504423	522540	809922	36637	160586	81651	551977	5161	6982	13148	16527	78581	100807	75713	161113	16764
2017-02	developmental biology	6609	71667		43149	51497	50679	901913	98258	243218	90989	1934	71667	163437	28710	504423	522540	809922	36637	160586	81651	551977	5161	6982	13148	16527	78581	100807	75713	161113	16764
2017-02	ecology	10160	173597		43149	51497	50679	901913	98258	243218	90989	1934	71667	173597	28710	504423	522540	809922	36637	160586	81651	551977	5161	6982	13148	16527	78581	100807	75713	161113	16764
2017-02	epidemiology	4033	32743		43149	51497	50679	901913	98258	243218	90989	1934	71667	173597	32743	504423	522540	809922	36637	160586	81651	551977	5161	6982	13148	16527	78581	100807	75713	161113	16764
2017-02	evolutionary biology	22847	527270		43149	51497	50679	901913	98258	243218	90989	1934	71667	173597	32743	527270	522540	809922	36637	160586	81651	551977	5161	6982	13148	16527	78581	100807	75713	161113	16764
2017-02	genetics	26017	548557		43149	51497	50679	901913	98258	243218	90989	1934	71667	173597	32743	527270	548557	809922	36637	160586	81651	551977	5161	6982	13148	16527	78581	100807	75713	161113	16764
2017-02	genomics	62786	872708		43149	51497	50679	901913	98258	243218	90989	1934	71667	173597	32743	527270	548557	872708	36637	160586	81651	551977	5161	6982	13148	16527	78581	100807	75713	161113	16764
2017-02	immunology	2087	38724		43149	51497	50679	901913	98258	243218	90989	1934	71667	173597	32743	527270	548557	872708	38724	160586	81651	551977	5161	6982	13148	16527	78581	100807	75713	161113	16764
2017-02	microbiology	18099	178685		43149	51497	50679	901913	98258	243218	90989	1934	71667	173597	32743	527270	548557	872708	38724	178685	81651	551977	5161	6982	13148	16527	78581	100807	75713	161113	16764
2017-02	molecular biology	7114	88765		43149	51497	50679	901913	98258	243218	90989	1934	71667	173597	32743	527270	548557	872708	38724	178685	88765	551977	5161	6982	13148	16527	78581	100807	75713	161113	16764
2017-02	neuroscience	51297	603274		43149	51497	50679	901913	98258	243218	90989	1934	71667	173597	32743	527270	548557	872708	38724	178685	88765	603274	5161	6982	13148	16527	78581	100807	75713	161113	16764
2017-02	paleontology	318	5479		43149	51497	50679	901913	98258	243218	90989	1934	71667	173597	32743	527270	548557	872708	38724	178685	88765	603274	5479	6982	13148	16527	78581	100807	75713	161113	16764
2017-02	pathology	588	7570		43149	51497	50679	901913	98258	243218	90989	1934	71667	173597	32743	527270	548557	872708	38724	178685	88765	603274	5479	7570	13148	16527	78581	100807	75713	161113	16764
2017-02	pharmacology and toxicology	2360	15508		43149	51497	50679	901913	98258	243218	90989	1934	71667	173597	32743	527270	548557	872708	38724	178685	88765	603274	5479	7570	15508	16527	78581	100807	75713	161113	16764
2017-02	physiology	737	17264		43149	51497	50679	901913	98258	243218	90989	1934	71667	173597	32743	527270	548557	872708	38724	178685	88765	603274	5479	7570	15508	17264	78581	100807	75713	161113	16764
2017-02	plant biology	6634	85215		43149	51497	50679	901913	98258	243218	90989	1934	71667	173597	32743	527270	548557	872708	38724	178685	88765	603274	5479	7570	15508	17264	85215	100807	75713	161113	16764
2017-02	scientific communication and education	9719	110526		43149	51497	50679	901913	98258	243218	90989	1934	71667	173597	32743	527270	548557	872708	38724	178685	88765	603274	5479	7570	15508	17264	85215	110526	75713	161113	16764
2017-02	synthetic biology	4168	79881		43149	51497	50679	901913	98258	243218	90989	1934	71667	173597	32743	527270	548557	872708	38724	178685	88765	603274	5479	7570	15508	17264	85215	110526	79881	161113	16764
2017-02	systems biology	8624	169737		43149	51497	50679	901913	98258	243218	90989	1934	71667	173597	32743	527270	548557	872708	38724	178685	88765	603274	5479	7570	15508	17264	85215	110526	79881	169737	16764
2017-02	zoology	732	17496		43149	51497	50679	901913	98258	243218	90989	1934	71667	173597	32743	527270	548557	872708	38724	178685	88765	603274	5479	7570	15508	17264	85215	110526	79881	169737	17496
2017-03	animal behavior and cognition	4241	47390		47390	51497	50679	901913	98258	243218	90989	1934	71667	173597	32743	527270	548557	872708	38724	178685	88765	603274	5479	7570	15508	17264	85215	110526	79881	169737	17496
2017-03	biochemistry	6480	57977		47390	57977	50679	901913	98258	243218	90989	1934	71667	173597	32743	527270	548557	872708	38724	178685	88765	603274	5479	7570	15508	17264	85215	110526	79881	169737	17496
2017-03	bioengineering	6318	56997		47390	57977	56997	901913	98258	243218	90989	1934	71667	173597	32743	527270	548557	872708	38724	178685	88765	603274	5479	7570	15508	17264	85215	110526	79881	169737	17496
2017-03	bioinformatics	73106	975019		47390	57977	56997	975019	98258	243218	90989	1934	71667	173597	32743	527270	548557	872708	38724	178685	88765	603274	5479	7570	15508	17264	85215	110526	79881	169737	17496
2017-03	biophysics	10829	109087		47390	57977	56997	975019	109087	243218	90989	1934	71667	173597	32743	527270	548557	872708	38724	178685	88765	603274	5479	7570	15508	17264	85215	110526	79881	169737	17496
2017-03	cancer biology	10177	253395		47390	57977	56997	975019	109087	253395	90989	1934	71667	173597	32743	527270	548557	872708	38724	178685	88765	603274	5479	7570	15508	17264	85215	110526	79881	169737	17496
2017-03	cell biology	9531	100520		47390	57977	56997	975019	109087	253395	100520	1934	71667	173597	32743	527270	548557	872708	38724	178685	88765	603274	5479	7570	15508	17264	85215	110526	79881	169737	17496
2017-03	clinical trials	193	2127		47390	57977	56997	975019	109087	253395	100520	2127	71667	173597	32743	527270	548557	872708	38724	178685	88765	603274	5479	7570	15508	17264	85215	110526	79881	169737	17496
2017-03	developmental biology	6624	78291		47390	57977	56997	975019	109087	253395	100520	2127	78291	173597	32743	527270	548557	872708	38724	178685	88765	603274	5479	7570	15508	17264	85215	110526	79881	169737	17496
2017-03	ecology	12691	186288		47390	57977	56997	975019	109087	253395	100520	2127	78291	186288	32743	527270	548557	872708	38724	178685	88765	603274	5479	7570	15508	17264	85215	110526	79881	169737	17496
2017-03	epidemiology	5505	38248		47390	57977	56997	975019	109087	253395	100520	2127	78291	186288	38248	527270	548557	872708	38724	178685	88765	603274	5479	7570	15508	17264	85215	110526	79881	169737	17496
2017-03	evolutionary biology	34912	562182		47390	57977	56997	975019	109087	253395	100520	2127	78291	186288	38248	562182	548557	872708	38724	178685	88765	603274	5479	7570	15508	17264	85215	110526	79881	169737	17496
2017-03	genetics	38829	587386		47390	57977	56997	975019	109087	253395	100520	2127	78291	186288	38248	562182	587386	872708	38724	178685	88765	603274	5479	7570	15508	17264	85215	110526	79881	169737	17496
2017-03	genomics	71067	943775		47390	57977	56997	975019	109087	253395	100520	2127	78291	186288	38248	562182	587386	943775	38724	178685	88765	603274	5479	7570	15508	17264	85215	110526	79881	169737	17496
2017-03	immunology	3405	42129		47390	57977	56997	975019	109087	253395	100520	2127	78291	186288	38248	562182	587386	943775	42129	178685	88765	603274	5479	7570	15508	17264	85215	110526	79881	169737	17496
2017-03	microbiology	20761	199446		47390	57977	56997	975019	109087	253395	100520	2127	78291	186288	38248	562182	587386	943775	42129	199446	88765	603274	5479	7570	15508	17264	85215	110526	79881	169737	17496
2017-03	molecular biology	7659	96424		47390	57977	56997	975019	109087	253395	100520	2127	78291	186288	38248	562182	587386	943775	42129	199446	96424	603274	5479	7570	15508	17264	85215	110526	79881	169737	17496
2017-03	neuroscience	63309	666583		47390	57977	56997	975019	109087	253395	100520	2127	78291	186288	38248	562182	587386	943775	42129	199446	96424	666583	5479	7570	15508	17264	85215	110526	79881	169737	17496
2017-03	paleontology	485	5964		47390	57977	56997	975019	109087	253395	100520	2127	78291	186288	38248	562182	587386	943775	42129	199446	96424	666583	5964	7570	15508	17264	85215	110526	79881	169737	17496
2017-03	pathology	708	8278		47390	57977	56997	975019	109087	253395	100520	2127	78291	186288	38248	562182	587386	943775	42129	199446	96424	666583	5964	8278	15508	17264	85215	110526	79881	169737	17496
2017-03	pharmacology and toxicology	2240	17748		47390	57977	56997	975019	109087	253395	100520	2127	78291	186288	38248	562182	587386	943775	42129	199446	96424	666583	5964	8278	17748	17264	85215	110526	79881	169737	17496
2017-03	physiology	945	18209		47390	57977	56997	975019	109087	253395	100520	2127	78291	186288	38248	562182	587386	943775	42129	199446	96424	666583	5964	8278	17748	18209	85215	110526	79881	169737	17496
2017-03	plant biology	10634	95849		47390	57977	56997	975019	109087	253395	100520	2127	78291	186288	38248	562182	587386	943775	42129	199446	96424	666583	5964	8278	17748	18209	95849	110526	79881	169737	17496
2017-03	scientific communication and education	8920	119446		47390	57977	56997	975019	109087	253395	100520	2127	78291	186288	38248	562182	587386	943775	42129	199446	96424	666583	5964	8278	17748	18209	95849	119446	79881	169737	17496
2017-03	synthetic biology	9093	88974		47390	57977	56997	975019	109087	253395	100520	2127	78291	186288	38248	562182	587386	943775	42129	199446	96424	666583	5964	8278	17748	18209	95849	119446	88974	169737	17496
2017-03	systems biology	11605	181342		47390	57977	56997	975019	109087	253395	100520	2127	78291	186288	38248	562182	587386	943775	42129	199446	96424	666583	5964	8278	17748	18209	95849	119446	88974	181342	17496
2017-03	zoology	1343	18839		47390	57977	56997	975019	109087	253395	100520	2127	78291	186288	38248	562182	587386	943775	42129	199446	96424	666583	5964	8278	17748	18209	95849	119446	88974	181342	18839
2017-04	animal behavior and cognition	4456	51846		51846	57977	56997	975019	109087	253395	100520	2127	78291	186288	38248	562182	587386	943775	42129	199446	96424	666583	5964	8278	17748	18209	95849	119446	88974	181342	18839
2017-04	biochemistry	8299	66276		51846	66276	56997	975019	109087	253395	100520	2127	78291	186288	38248	562182	587386	943775	42129	199446	96424	666583	5964	8278	17748	18209	95849	119446	88974	181342	18839
2017-04	bioengineering	5281	62278		51846	66276	62278	975019	109087	253395	100520	2127	78291	186288	38248	562182	587386	943775	42129	199446	96424	666583	5964	8278	17748	18209	95849	119446	88974	181342	18839
2017-04	bioinformatics	74494	1049513		51846	66276	62278	1049513	109087	253395	100520	2127	78291	186288	38248	562182	587386	943775	42129	199446	96424	666583	5964	8278	17748	18209	95849	119446	88974	181342	18839
2017-04	biophysics	11538	120625		51846	66276	62278	1049513	120625	253395	100520	2127	78291	186288	38248	562182	587386	943775	42129	199446	96424	666583	5964	8278	17748	18209	95849	119446	88974	181342	18839
2017-04	cancer biology	11193	264588		51846	66276	62278	1049513	120625	264588	100520	2127	78291	186288	38248	562182	587386	943775	42129	199446	96424	666583	5964	8278	17748	18209	95849	119446	88974	181342	18839
2017-04	cell biology	15267	115787		51846	66276	62278	1049513	120625	264588	115787	2127	78291	186288	38248	562182	587386	943775	42129	199446	96424	666583	5964	8278	17748	18209	95849	119446	88974	181342	18839
2017-04	clinical trials	964	3091		51846	66276	62278	1049513	120625	264588	115787	3091	78291	186288	38248	562182	587386	943775	42129	199446	96424	666583	5964	8278	17748	18209	95849	119446	88974	181342	18839
2017-04	developmental biology	9627	87918		51846	66276	62278	1049513	120625	264588	115787	3091	87918	186288	38248	562182	587386	943775	42129	199446	96424	666583	5964	8278	17748	18209	95849	119446	88974	181342	18839
2017-04	ecology	12568	198856		51846	66276	62278	1049513	120625	264588	115787	3091	87918	198856	38248	562182	587386	943775	42129	199446	96424	666583	5964	8278	17748	18209	95849	119446	88974	181342	18839
2017-04	epidemiology	6600	44848		51846	66276	62278	1049513	120625	264588	115787	3091	87918	198856	44848	562182	587386	943775	42129	199446	96424	666583	5964	8278	17748	18209	95849	119446	88974	181342	18839
2017-04	evolutionary biology	35242	597424		51846	66276	62278	1049513	120625	264588	115787	3091	87918	198856	44848	597424	587386	943775	42129	199446	96424	666583	5964	8278	17748	18209	95849	119446	88974	181342	18839
2017-04	genetics	31319	618705		51846	66276	62278	1049513	120625	264588	115787	3091	87918	198856	44848	597424	618705	943775	42129	199446	96424	666583	5964	8278	17748	18209	95849	119446	88974	181342	18839
2017-04	genomics	81343	1025118		51846	66276	62278	1049513	120625	264588	115787	3091	87918	198856	44848	597424	618705	1025118	42129	199446	96424	666583	5964	8278	17748	18209	95849	119446	88974	181342	18839
2017-04	immunology	3632	45761		51846	66276	62278	1049513	120625	264588	115787	3091	87918	198856	44848	597424	618705	1025118	45761	199446	96424	666583	5964	8278	17748	18209	95849	119446	88974	181342	18839
2017-04	microbiology	21848	221294		51846	66276	62278	1049513	120625	264588	115787	3091	87918	198856	44848	597424	618705	1025118	45761	221294	96424	666583	5964	8278	17748	18209	95849	119446	88974	181342	18839
2017-04	molecular biology	20497	116921		51846	66276	62278	1049513	120625	264588	115787	3091	87918	198856	44848	597424	618705	1025118	45761	221294	116921	666583	5964	8278	17748	18209	95849	119446	88974	181342	18839
2017-04	neuroscience	74248	740831		51846	66276	62278	1049513	120625	264588	115787	3091	87918	198856	44848	597424	618705	1025118	45761	221294	116921	740831	5964	8278	17748	18209	95849	119446	88974	181342	18839
2017-04	paleontology	299	6263		51846	66276	62278	1049513	120625	264588	115787	3091	87918	198856	44848	597424	618705	1025118	45761	221294	116921	740831	6263	8278	17748	18209	95849	119446	88974	181342	18839
2017-04	pathology	921	9199		51846	66276	62278	1049513	120625	264588	115787	3091	87918	198856	44848	597424	618705	1025118	45761	221294	116921	740831	6263	9199	17748	18209	95849	119446	88974	181342	18839
2017-04	pharmacology and toxicology	2633	20381		51846	66276	62278	1049513	120625	264588	115787	3091	87918	198856	44848	597424	618705	1025118	45761	221294	116921	740831	6263	9199	20381	18209	95849	119446	88974	181342	18839
2017-04	physiology	2063	20272		51846	66276	62278	1049513	120625	264588	115787	3091	87918	198856	44848	597424	618705	1025118	45761	221294	116921	740831	6263	9199	20381	20272	95849	119446	88974	181342	18839
2017-04	plant biology	11070	106919		51846	66276	62278	1049513	120625	264588	115787	3091	87918	198856	44848	597424	618705	1025118	45761	221294	116921	740831	6263	9199	20381	20272	106919	119446	88974	181342	18839
2017-04	scientific communication and education	10698	130144		51846	66276	62278	1049513	120625	264588	115787	3091	87918	198856	44848	597424	618705	1025118	45761	221294	116921	740831	6263	9199	20381	20272	106919	130144	88974	181342	18839
2017-04	synthetic biology	6256	95230		51846	66276	62278	1049513	120625	264588	115787	3091	87918	198856	44848	597424	618705	1025118	45761	221294	116921	740831	6263	9199	20381	20272	106919	130144	95230	181342	18839
2017-04	systems biology	13057	194399		51846	66276	62278	1049513	120625	264588	115787	3091	87918	198856	44848	597424	618705	1025118	45761	221294	116921	740831	6263	9199	20381	20272	106919	130144	95230	194399	18839
2017-04	zoology	1301	20140		51846	66276	62278	1049513	120625	264588	115787	3091	87918	198856	44848	597424	618705	1025118	45761	221294	116921	740831	6263	9199	20381	20272	106919	130144	95230	194399	20140
2017-05	animal behavior and cognition	5076	56922		56922	66276	62278	1049513	120625	264588	115787	3091	87918	198856	44848	597424	618705	1025118	45761	221294	116921	740831	6263	9199	20381	20272	106919	130144	95230	194399	20140
2017-05	biochemistry	7995	74271		56922	74271	62278	1049513	120625	264588	115787	3091	87918	198856	44848	597424	618705	1025118	45761	221294	116921	740831	6263	9199	20381	20272	106919	130144	95230	194399	20140
2017-05	bioengineering	6246	68524		56922	74271	68524	1049513	120625	264588	115787	3091	87918	198856	44848	597424	618705	1025118	45761	221294	116921	740831	6263	9199	20381	20272	106919	130144	95230	194399	20140
2017-05	bioinformatics	78596	1128109		56922	74271	68524	1128109	120625	264588	115787	3091	87918	198856	44848	597424	618705	1025118	45761	221294	116921	740831	6263	9199	20381	20272	106919	130144	95230	194399	20140
2017-05	biophysics	16081	136706		56922	74271	68524	1128109	136706	264588	115787	3091	87918	198856	44848	597424	618705	1025118	45761	221294	116921	740831	6263	9199	20381	20272	106919	130144	95230	194399	20140
2017-05	cancer biology	11037	275625		56922	74271	68524	1128109	136706	275625	115787	3091	87918	198856	44848	597424	618705	1025118	45761	221294	116921	740831	6263	9199	20381	20272	106919	130144	95230	194399	20140
2017-05	cell biology	24106	139893		56922	74271	68524	1128109	136706	275625	139893	3091	87918	198856	44848	597424	618705	1025118	45761	221294	116921	740831	6263	9199	20381	20272	106919	130144	95230	194399	20140
2017-05	clinical trials	880	3971		56922	74271	68524	1128109	136706	275625	139893	3971	87918	198856	44848	597424	618705	1025118	45761	221294	116921	740831	6263	9199	20381	20272	106919	130144	95230	194399	20140
2017-05	developmental biology	10149	98067		56922	74271	68524	1128109	136706	275625	139893	3971	98067	198856	44848	597424	618705	1025118	45761	221294	116921	740831	6263	9199	20381	20272	106919	130144	95230	194399	20140
2017-05	ecology	14057	212913		56922	74271	68524	1128109	136706	275625	139893	3971	98067	212913	44848	597424	618705	1025118	45761	221294	116921	740831	6263	9199	20381	20272	106919	130144	95230	194399	20140
2017-05	epidemiology	6543	51391		56922	74271	68524	1128109	136706	275625	139893	3971	98067	212913	51391	597424	618705	1025118	45761	221294	116921	740831	6263	9199	20381	20272	106919	130144	95230	194399	20140
2017-05	evolutionary biology	33257	630681		56922	74271	68524	1128109	136706	275625	139893	3971	98067	212913	51391	630681	618705	1025118	45761	221294	116921	740831	6263	9199	20381	20272	106919	130144	95230	194399	20140
2017-05	genetics	37446	656151		56922	74271	68524	1128109	136706	275625	139893	3971	98067	212913	51391	630681	656151	1025118	45761	221294	116921	740831	6263	9199	20381	20272	106919	130144	95230	194399	20140
2017-05	genomics	90423	1115541		56922	74271	68524	1128109	136706	275625	139893	3971	98067	212913	51391	630681	656151	1115541	45761	221294	116921	740831	6263	9199	20381	20272	106919	130144	95230	194399	20140
2017-05	immunology	4476	50237		56922	74271	68524	1128109	136706	275625	139893	3971	98067	212913	51391	630681	656151	1115541	50237	221294	116921	740831	6263	9199	20381	20272	106919	130144	95230	194399	20140
2017-05	microbiology	22519	243813		56922	74271	68524	1128109	136706	275625	139893	3971	98067	212913	51391	630681	656151	1115541	50237	243813	116921	740831	6263	9199	20381	20272	106919	130144	95230	194399	20140
2017-05	molecular biology	12554	129475		56922	74271	68524	1128109	136706	275625	139893	3971	98067	212913	51391	630681	656151	1115541	50237	243813	129475	740831	6263	9199	20381	20272	106919	130144	95230	194399	20140
2017-05	neuroscience	77798	818629		56922	74271	68524	1128109	136706	275625	139893	3971	98067	212913	51391	630681	656151	1115541	50237	243813	129475	818629	6263	9199	20381	20272	106919	130144	95230	194399	20140
2017-05	paleontology	316	6579		56922	74271	68524	1128109	136706	275625	139893	3971	98067	212913	51391	630681	656151	1115541	50237	243813	129475	818629	6579	9199	20381	20272	106919	130144	95230	194399	20140
2017-05	pathology	1125	10324		56922	74271	68524	1128109	136706	275625	139893	3971	98067	212913	51391	630681	656151	1115541	50237	243813	129475	818629	6579	10324	20381	20272	106919	130144	95230	194399	20140
2017-05	pharmacology and toxicology	2712	23093		56922	74271	68524	1128109	136706	275625	139893	3971	98067	212913	51391	630681	656151	1115541	50237	243813	129475	818629	6579	10324	23093	20272	106919	130144	95230	194399	20140
2017-05	physiology	1401	21673		56922	74271	68524	1128109	136706	275625	139893	3971	98067	212913	51391	630681	656151	1115541	50237	243813	129475	818629	6579	10324	23093	21673	106919	130144	95230	194399	20140
2017-05	plant biology	10754	117673		56922	74271	68524	1128109	136706	275625	139893	3971	98067	212913	51391	630681	656151	1115541	50237	243813	129475	818629	6579	10324	23093	21673	117673	130144	95230	194399	20140
2017-05	scientific communication and education	12626	142770		56922	74271	68524	1128109	136706	275625	139893	3971	98067	212913	51391	630681	656151	1115541	50237	243813	129475	818629	6579	10324	23093	21673	117673	142770	95230	194399	20140
2017-05	synthetic biology	6518	101748		56922	74271	68524	1128109	136706	275625	139893	3971	98067	212913	51391	630681	656151	1115541	50237	243813	129475	818629	6579	10324	23093	21673	117673	142770	101748	194399	20140
2017-05	systems biology	14908	209307		56922	74271	68524	1128109	136706	275625	139893	3971	98067	212913	51391	630681	656151	1115541	50237	243813	129475	818629	6579	10324	23093	21673	117673	142770	101748	209307	20140
2017-05	zoology	1448	21588		56922	74271	68524	1128109	136706	275625	139893	3971	98067	212913	51391	630681	656151	1115541	50237	243813	129475	818629	6579	10324	23093	21673	117673	142770	101748	209307	21588
2017-06	animal behavior and cognition	4567	61489		61489	74271	68524	1128109	136706	275625	139893	3971	98067	212913	51391	630681	656151	1115541	50237	243813	129475	818629	6579	10324	23093	21673	117673	142770	101748	209307	21588
2017-06	biochemistry	10751	85022		61489	85022	68524	1128109	136706	275625	139893	3971	98067	212913	51391	630681	656151	1115541	50237	243813	129475	818629	6579	10324	23093	21673	117673	142770	101748	209307	21588
2017-06	bioengineering	6142	74666		61489	85022	74666	1128109	136706	275625	139893	3971	98067	212913	51391	630681	656151	1115541	50237	243813	129475	818629	6579	10324	23093	21673	117673	142770	101748	209307	21588
2017-06	bioinformatics	91788	1219897		61489	85022	74666	1219897	136706	275625	139893	3971	98067	212913	51391	630681	656151	1115541	50237	243813	129475	818629	6579	10324	23093	21673	117673	142770	101748	209307	21588
2017-06	biophysics	14643	151349		61489	85022	74666	1219897	151349	275625	139893	3971	98067	212913	51391	630681	656151	1115541	50237	243813	129475	818629	6579	10324	23093	21673	117673	142770	101748	209307	21588
2017-06	cancer biology	12517	288142		61489	85022	74666	1219897	151349	288142	139893	3971	98067	212913	51391	630681	656151	1115541	50237	243813	129475	818629	6579	10324	23093	21673	117673	142770	101748	209307	21588
2017-06	cell biology	18211	158104		61489	85022	74666	1219897	151349	288142	158104	3971	98067	212913	51391	630681	656151	1115541	50237	243813	129475	818629	6579	10324	23093	21673	117673	142770	101748	209307	21588
2017-06	clinical trials	506	4477		61489	85022	74666	1219897	151349	288142	158104	4477	98067	212913	51391	630681	656151	1115541	50237	243813	129475	818629	6579	10324	23093	21673	117673	142770	101748	209307	21588
2017-06	developmental biology	8789	106856		61489	85022	74666	1219897	151349	288142	158104	4477	106856	212913	51391	630681	656151	1115541	50237	243813	129475	818629	6579	10324	23093	21673	117673	142770	101748	209307	21588
2017-06	ecology	13644	226557		61489	85022	74666	1219897	151349	288142	158104	4477	106856	226557	51391	630681	656151	1115541	50237	243813	129475	818629	6579	10324	23093	21673	117673	142770	101748	209307	21588
2017-06	epidemiology	6004	57395		61489	85022	74666	1219897	151349	288142	158104	4477	106856	226557	57395	630681	656151	1115541	50237	243813	129475	818629	6579	10324	23093	21673	117673	142770	101748	209307	21588
2017-06	evolutionary biology	39941	670622		61489	85022	74666	1219897	151349	288142	158104	4477	106856	226557	57395	670622	656151	1115541	50237	243813	129475	818629	6579	10324	23093	21673	117673	142770	101748	209307	21588
2017-06	genetics	37202	693353		61489	85022	74666	1219897	151349	288142	158104	4477	106856	226557	57395	670622	693353	1115541	50237	243813	129475	818629	6579	10324	23093	21673	117673	142770	101748	209307	21588
2017-06	genomics	72280	1187821		61489	85022	74666	1219897	151349	288142	158104	4477	106856	226557	57395	670622	693353	1187821	50237	243813	129475	818629	6579	10324	23093	21673	117673	142770	101748	209307	21588
2017-06	immunology	4270	54507		61489	85022	74666	1219897	151349	288142	158104	4477	106856	226557	57395	670622	693353	1187821	54507	243813	129475	818629	6579	10324	23093	21673	117673	142770	101748	209307	21588
2017-06	microbiology	22916	266729		61489	85022	74666	1219897	151349	288142	158104	4477	106856	226557	57395	670622	693353	1187821	54507	266729	129475	818629	6579	10324	23093	21673	117673	142770	101748	209307	21588
2017-06	molecular biology	13395	142870		61489	85022	74666	1219897	151349	288142	158104	4477	106856	226557	57395	670622	693353	1187821	54507	266729	142870	818629	6579	10324	23093	21673	117673	142770	101748	209307	21588
2017-06	neuroscience	78250	896879		61489	85022	74666	1219897	151349	288142	158104	4477	106856	226557	57395	670622	693353	1187821	54507	266729	142870	896879	6579	10324	23093	21673	117673	142770	101748	209307	21588
2017-06	paleontology	420	6999		61489	85022	74666	1219897	151349	288142	158104	4477	106856	226557	57395	670622	693353	1187821	54507	266729	142870	896879	6999	10324	23093	21673	117673	142770	101748	209307	21588
2017-06	pathology	1174	11498		61489	85022	74666	1219897	151349	288142	158104	4477	106856	226557	57395	670622	693353	1187821	54507	266729	142870	896879	6999	11498	23093	21673	117673	142770	101748	209307	21588
2017-06	pharmacology and toxicology	3278	26371		61489	85022	74666	1219897	151349	288142	158104	4477	106856	226557	57395	670622	693353	1187821	54507	266729	142870	896879	6999	11498	26371	21673	117673	142770	101748	209307	21588
2017-06	physiology	1604	23277		61489	85022	74666	1219897	151349	288142	158104	4477	106856	226557	57395	670622	693353	1187821	54507	266729	142870	896879	6999	11498	26371	23277	117673	142770	101748	209307	21588
2017-06	plant biology	12598	130271		61489	85022	74666	1219897	151349	288142	158104	4477	106856	226557	57395	670622	693353	1187821	54507	266729	142870	896879	6999	11498	26371	23277	130271	142770	101748	209307	21588
2017-06	scientific communication and education	14487	157257		61489	85022	74666	1219897	151349	288142	158104	4477	106856	226557	57395	670622	693353	1187821	54507	266729	142870	896879	6999	11498	26371	23277	130271	157257	101748	209307	21588
2017-06	synthetic biology	6403	108151		61489	85022	74666	1219897	151349	288142	158104	4477	106856	226557	57395	670622	693353	1187821	54507	266729	142870	896879	6999	11498	26371	23277	130271	157257	108151	209307	21588
2017-06	systems biology	13786	223093		61489	85022	74666	1219897	151349	288142	158104	4477	106856	226557	57395	670622	693353	1187821	54507	266729	142870	896879	6999	11498	26371	23277	130271	157257	108151	223093	21588
2017-06	zoology	955	22543		61489	85022	74666	1219897	151349	288142	158104	4477	106856	226557	57395	670622	693353	1187821	54507	266729	142870	896879	6999	11498	26371	23277	130271	157257	108151	223093	22543
2017-07	animal behavior and cognition	4956	66445		66445	85022	74666	1219897	151349	288142	158104	4477	106856	226557	57395	670622	693353	1187821	54507	266729	142870	896879	6999	11498	26371	23277	130271	157257	108151	223093	22543
2017-07	biochemistry	13668	98690		66445	98690	74666	1219897	151349	288142	158104	4477	106856	226557	57395	670622	693353	1187821	54507	266729	142870	896879	6999	11498	26371	23277	130271	157257	108151	223093	22543
2017-07	bioengineering	7124	81790		66445	98690	81790	1219897	151349	288142	158104	4477	106856	226557	57395	670622	693353	1187821	54507	266729	142870	896879	6999	11498	26371	23277	130271	157257	108151	223093	22543
2017-07	bioinformatics	78903	1298800		66445	98690	81790	1298800	151349	288142	158104	4477	106856	226557	57395	670622	693353	1187821	54507	266729	142870	896879	6999	11498	26371	23277	130271	157257	108151	223093	22543
2017-07	biophysics	13432	164781		66445	98690	81790	1298800	164781	288142	158104	4477	106856	226557	57395	670622	693353	1187821	54507	266729	142870	896879	6999	11498	26371	23277	130271	157257	108151	223093	22543
2017-07	cancer biology	15766	303908		66445	98690	81790	1298800	164781	303908	158104	4477	106856	226557	57395	670622	693353	1187821	54507	266729	142870	896879	6999	11498	26371	23277	130271	157257	108151	223093	22543
2017-07	cell biology	17408	175512		66445	98690	81790	1298800	164781	303908	175512	4477	106856	226557	57395	670622	693353	1187821	54507	266729	142870	896879	6999	11498	26371	23277	130271	157257	108151	223093	22543
2017-07	clinical trials	483	4960		66445	98690	81790	1298800	164781	303908	175512	4960	106856	226557	57395	670622	693353	1187821	54507	266729	142870	896879	6999	11498	26371	23277	130271	157257	108151	223093	22543
2017-07	developmental biology	8540	115396		66445	98690	81790	1298800	164781	303908	175512	4960	115396	226557	57395	670622	693353	1187821	54507	266729	142870	896879	6999	11498	26371	23277	130271	157257	108151	223093	22543
2017-07	ecology	11736	238293		66445	98690	81790	1298800	164781	303908	175512	4960	115396	238293	57395	670622	693353	1187821	54507	266729	142870	896879	6999	11498	26371	23277	130271	157257	108151	223093	22543
2017-07	epidemiology	6202	63597		66445	98690	81790	1298800	164781	303908	175512	4960	115396	238293	63597	670622	693353	1187821	54507	266729	142870	896879	6999	11498	26371	23277	130271	157257	108151	223093	22543
2017-07	evolutionary biology	31419	702041		66445	98690	81790	1298800	164781	303908	175512	4960	115396	238293	63597	702041	693353	1187821	54507	266729	142870	896879	6999	11498	26371	23277	130271	157257	108151	223093	22543
2017-07	genetics	36744	730097		66445	98690	81790	1298800	164781	303908	175512	4960	115396	238293	63597	702041	730097	1187821	54507	266729	142870	896879	6999	11498	26371	23277	130271	157257	108151	223093	22543
2017-07	genomics	78877	1266698		66445	98690	81790	1298800	164781	303908	175512	4960	115396	238293	63597	702041	730097	1266698	54507	266729	142870	896879	6999	11498	26371	23277	130271	157257	108151	223093	22543
2017-07	immunology	5387	59894		66445	98690	81790	1298800	164781	303908	175512	4960	115396	238293	63597	702041	730097	1266698	59894	266729	142870	896879	6999	11498	26371	23277	130271	157257	108151	223093	22543
2017-07	microbiology	20293	287022		66445	98690	81790	1298800	164781	303908	175512	4960	115396	238293	63597	702041	730097	1266698	59894	287022	142870	896879	6999	11498	26371	23277	130271	157257	108151	223093	22543
2017-07	molecular biology	13714	156584		66445	98690	81790	1298800	164781	303908	175512	4960	115396	238293	63597	702041	730097	1266698	59894	287022	156584	896879	6999	11498	26371	23277	130271	157257	108151	223093	22543
2017-07	neuroscience	75373	972252		66445	98690	81790	1298800	164781	303908	175512	4960	115396	238293	63597	702041	730097	1266698	59894	287022	156584	972252	6999	11498	26371	23277	130271	157257	108151	223093	22543
2017-07	paleontology	282	7281		66445	98690	81790	1298800	164781	303908	175512	4960	115396	238293	63597	702041	730097	1266698	59894	287022	156584	972252	7281	11498	26371	23277	130271	157257	108151	223093	22543
2017-07	pathology	1098	12596		66445	98690	81790	1298800	164781	303908	175512	4960	115396	238293	63597	702041	730097	1266698	59894	287022	156584	972252	7281	12596	26371	23277	130271	157257	108151	223093	22543
2017-07	pharmacology and toxicology	2005	28376		66445	98690	81790	1298800	164781	303908	175512	4960	115396	238293	63597	702041	730097	1266698	59894	287022	156584	972252	7281	12596	28376	23277	130271	157257	108151	223093	22543
2017-07	physiology	1752	25029		66445	98690	81790	1298800	164781	303908	175512	4960	115396	238293	63597	702041	730097	1266698	59894	287022	156584	972252	7281	12596	28376	25029	130271	157257	108151	223093	22543
2017-07	plant biology	14658	144929		66445	98690	81790	1298800	164781	303908	175512	4960	115396	238293	63597	702041	730097	1266698	59894	287022	156584	972252	7281	12596	28376	25029	144929	157257	108151	223093	22543
2017-07	scientific communication and education	8254	165511		66445	98690	81790	1298800	164781	303908	175512	4960	115396	238293	63597	702041	730097	1266698	59894	287022	156584	972252	7281	12596	28376	25029	144929	165511	108151	223093	22543
2017-07	synthetic biology	6514	114665		66445	98690	81790	1298800	164781	303908	175512	4960	115396	238293	63597	702041	730097	1266698	59894	287022	156584	972252	7281	12596	28376	25029	144929	165511	114665	223093	22543
2017-07	systems biology	12708	235801		66445	98690	81790	1298800	164781	303908	175512	4960	115396	238293	63597	702041	730097	1266698	59894	287022	156584	972252	7281	12596	28376	25029	144929	165511	114665	235801	22543
2017-07	zoology	737	23280		66445	98690	81790	1298800	164781	303908	175512	4960	115396	238293	63597	702041	730097	1266698	59894	287022	156584	972252	7281	12596	28376	25029	144929	165511	114665	235801	23280
2017-08	animal behavior and cognition	5806	72251		72251	98690	81790	1298800	164781	303908	175512	4960	115396	238293	63597	702041	730097	1266698	59894	287022	156584	972252	7281	12596	28376	25029	144929	165511	114665	235801	23280
2017-08	biochemistry	11738	110428		72251	110428	81790	1298800	164781	303908	175512	4960	115396	238293	63597	702041	730097	1266698	59894	287022	156584	972252	7281	12596	28376	25029	144929	165511	114665	235801	23280
2017-08	bioengineering	8002	89792		72251	110428	89792	1298800	164781	303908	175512	4960	115396	238293	63597	702041	730097	1266698	59894	287022	156584	972252	7281	12596	28376	25029	144929	165511	114665	235801	23280
2017-08	bioinformatics	85730	1384530		72251	110428	89792	1384530	164781	303908	175512	4960	115396	238293	63597	702041	730097	1266698	59894	287022	156584	972252	7281	12596	28376	25029	144929	165511	114665	235801	23280
2017-08	biophysics	15387	180168		72251	110428	89792	1384530	180168	303908	175512	4960	115396	238293	63597	702041	730097	1266698	59894	287022	156584	972252	7281	12596	28376	25029	144929	165511	114665	235801	23280
2017-08	cancer biology	14839	318747		72251	110428	89792	1384530	180168	318747	175512	4960	115396	238293	63597	702041	730097	1266698	59894	287022	156584	972252	7281	12596	28376	25029	144929	165511	114665	235801	23280
2017-08	cell biology	22408	197920		72251	110428	89792	1384530	180168	318747	197920	4960	115396	238293	63597	702041	730097	1266698	59894	287022	156584	972252	7281	12596	28376	25029	144929	165511	114665	235801	23280
2017-08	clinical trials	1408	6368		72251	110428	89792	1384530	180168	318747	197920	6368	115396	238293	63597	702041	730097	1266698	59894	287022	156584	972252	7281	12596	28376	25029	144929	165511	114665	235801	23280
2017-08	developmental biology	11157	126553		72251	110428	89792	1384530	180168	318747	197920	6368	126553	238293	63597	702041	730097	1266698	59894	287022	156584	972252	7281	12596	28376	25029	144929	165511	114665	235801	23280
2017-08	ecology	13996	252289		72251	110428	89792	1384530	180168	318747	197920	6368	126553	252289	63597	702041	730097	1266698	59894	287022	156584	972252	7281	12596	28376	25029	144929	165511	114665	235801	23280
2017-08	epidemiology	8202	71799		72251	110428	89792	1384530	180168	318747	197920	6368	126553	252289	71799	702041	730097	1266698	59894	287022	156584	972252	7281	12596	28376	25029	144929	165511	114665	235801	23280
2017-08	evolutionary biology	33517	735558		72251	110428	89792	1384530	180168	318747	197920	6368	126553	252289	71799	735558	730097	1266698	59894	287022	156584	972252	7281	12596	28376	25029	144929	165511	114665	235801	23280
2017-08	genetics	41833	771930		72251	110428	89792	1384530	180168	318747	197920	6368	126553	252289	71799	735558	771930	1266698	59894	287022	156584	972252	7281	12596	28376	25029	144929	165511	114665	235801	23280
2017-08	genomics	78815	1345513		72251	110428	89792	1384530	180168	318747	197920	6368	126553	252289	71799	735558	771930	1345513	59894	287022	156584	972252	7281	12596	28376	25029	144929	165511	114665	235801	23280
2017-08	immunology	6928	66822		72251	110428	89792	1384530	180168	318747	197920	6368	126553	252289	71799	735558	771930	1345513	66822	287022	156584	972252	7281	12596	28376	25029	144929	165511	114665	235801	23280
2017-08	microbiology	26348	313370		72251	110428	89792	1384530	180168	318747	197920	6368	126553	252289	71799	735558	771930	1345513	66822	313370	156584	972252	7281	12596	28376	25029	144929	165511	114665	235801	23280
2017-08	molecular biology	13646	170230		72251	110428	89792	1384530	180168	318747	197920	6368	126553	252289	71799	735558	771930	1345513	66822	313370	170230	972252	7281	12596	28376	25029	144929	165511	114665	235801	23280
2017-08	neuroscience	83757	1056009		72251	110428	89792	1384530	180168	318747	197920	6368	126553	252289	71799	735558	771930	1345513	66822	313370	170230	1056009	7281	12596	28376	25029	144929	165511	114665	235801	23280
2017-08	paleontology	397	7678		72251	110428	89792	1384530	180168	318747	197920	6368	126553	252289	71799	735558	771930	1345513	66822	313370	170230	1056009	7678	12596	28376	25029	144929	165511	114665	235801	23280
2017-08	pathology	1055	13651		72251	110428	89792	1384530	180168	318747	197920	6368	126553	252289	71799	735558	771930	1345513	66822	313370	170230	1056009	7678	13651	28376	25029	144929	165511	114665	235801	23280
2017-08	pharmacology and toxicology	2159	30535		72251	110428	89792	1384530	180168	318747	197920	6368	126553	252289	71799	735558	771930	1345513	66822	313370	170230	1056009	7678	13651	30535	25029	144929	165511	114665	235801	23280
2017-08	physiology	2331	27360		72251	110428	89792	1384530	180168	318747	197920	6368	126553	252289	71799	735558	771930	1345513	66822	313370	170230	1056009	7678	13651	30535	27360	144929	165511	114665	235801	23280
2017-08	plant biology	14997	159926		72251	110428	89792	1384530	180168	318747	197920	6368	126553	252289	71799	735558	771930	1345513	66822	313370	170230	1056009	7678	13651	30535	27360	159926	165511	114665	235801	23280
2017-08	scientific communication and education	10295	175806		72251	110428	89792	1384530	180168	318747	197920	6368	126553	252289	71799	735558	771930	1345513	66822	313370	170230	1056009	7678	13651	30535	27360	159926	175806	114665	235801	23280
2017-08	synthetic biology	6827	121492		72251	110428	89792	1384530	180168	318747	197920	6368	126553	252289	71799	735558	771930	1345513	66822	313370	170230	1056009	7678	13651	30535	27360	159926	175806	121492	235801	23280
2017-08	systems biology	14228	250029		72251	110428	89792	1384530	180168	318747	197920	6368	126553	252289	71799	735558	771930	1345513	66822	313370	170230	1056009	7678	13651	30535	27360	159926	175806	121492	250029	23280
2017-08	zoology	1055	24335		72251	110428	89792	1384530	180168	318747	197920	6368	126553	252289	71799	735558	771930	1345513	66822	313370	170230	1056009	7678	13651	30535	27360	159926	175806	121492	250029	24335
2017-09	animal behavior and cognition	5786	78037		78037	110428	89792	1384530	180168	318747	197920	6368	126553	252289	71799	735558	771930	1345513	66822	313370	170230	1056009	7678	13651	30535	27360	159926	175806	121492	250029	24335
2017-09	biochemistry	11416	121844		78037	121844	89792	1384530	180168	318747	197920	6368	126553	252289	71799	735558	771930	1345513	66822	313370	170230	1056009	7678	13651	30535	27360	159926	175806	121492	250029	24335
2017-09	bioengineering	6829	96621		78037	121844	96621	1384530	180168	318747	197920	6368	126553	252289	71799	735558	771930	1345513	66822	313370	170230	1056009	7678	13651	30535	27360	159926	175806	121492	250029	24335
2017-09	bioinformatics	87427	1471957		78037	121844	96621	1471957	180168	318747	197920	6368	126553	252289	71799	735558	771930	1345513	66822	313370	170230	1056009	7678	13651	30535	27360	159926	175806	121492	250029	24335
2017-09	biophysics	14889	195057		78037	121844	96621	1471957	195057	318747	197920	6368	126553	252289	71799	735558	771930	1345513	66822	313370	170230	1056009	7678	13651	30535	27360	159926	175806	121492	250029	24335
2017-09	cancer biology	17284	336031		78037	121844	96621	1471957	195057	336031	197920	6368	126553	252289	71799	735558	771930	1345513	66822	313370	170230	1056009	7678	13651	30535	27360	159926	175806	121492	250029	24335
2017-09	cell biology	23035	220955		78037	121844	96621	1471957	195057	336031	220955	6368	126553	252289	71799	735558	771930	1345513	66822	313370	170230	1056009	7678	13651	30535	27360	159926	175806	121492	250029	24335
2017-09	clinical trials	481	6849		78037	121844	96621	1471957	195057	336031	220955	6849	126553	252289	71799	735558	771930	1345513	66822	313370	170230	1056009	7678	13651	30535	27360	159926	175806	121492	250029	24335
2017-09	developmental biology	11076	137629		78037	121844	96621	1471957	195057	336031	220955	6849	137629	252289	71799	735558	771930	1345513	66822	313370	170230	1056009	7678	13651	30535	27360	159926	175806	121492	250029	24335
2017-09	ecology	13931	266220		78037	121844	96621	1471957	195057	336031	220955	6849	137629	266220	71799	735558	771930	1345513	66822	313370	170230	1056009	7678	13651	30535	27360	159926	175806	121492	250029	24335
2017-09	epidemiology	8251	80050		78037	121844	96621	1471957	195057	336031	220955	6849	137629	266220	80050	735558	771930	1345513	66822	313370	170230	1056009	7678	13651	30535	27360	159926	175806	121492	250029	24335
2017-09	evolutionary biology	36658	772216		78037	121844	96621	1471957	195057	336031	220955	6849	137629	266220	80050	772216	771930	1345513	66822	313370	170230	1056009	7678	13651	30535	27360	159926	175806	121492	250029	24335
2017-09	genetics	42196	814126		78037	121844	96621	1471957	195057	336031	220955	6849	137629	266220	80050	772216	814126	1345513	66822	313370	170230	1056009	7678	13651	30535	27360	159926	175806	121492	250029	24335
2017-09	genomics	88687	1434200		78037	121844	96621	1471957	195057	336031	220955	6849	137629	266220	80050	772216	814126	1434200	66822	313370	170230	1056009	7678	13651	30535	27360	159926	175806	121492	250029	24335
2017-09	immunology	4999	71821		78037	121844	96621	1471957	195057	336031	220955	6849	137629	266220	80050	772216	814126	1434200	71821	313370	170230	1056009	7678	13651	30535	27360	159926	175806	121492	250029	24335
2017-09	microbiology	23428	336798		78037	121844	96621	1471957	195057	336031	220955	6849	137629	266220	80050	772216	814126	1434200	71821	336798	170230	1056009	7678	13651	30535	27360	159926	175806	121492	250029	24335
2017-09	molecular biology	14160	184390		78037	121844	96621	1471957	195057	336031	220955	6849	137629	266220	80050	772216	814126	1434200	71821	336798	184390	1056009	7678	13651	30535	27360	159926	175806	121492	250029	24335
2017-09	neuroscience	86612	1142621		78037	121844	96621	1471957	195057	336031	220955	6849	137629	266220	80050	772216	814126	1434200	71821	336798	184390	1142621	7678	13651	30535	27360	159926	175806	121492	250029	24335
2017-09	paleontology	367	8045		78037	121844	96621	1471957	195057	336031	220955	6849	137629	266220	80050	772216	814126	1434200	71821	336798	184390	1142621	8045	13651	30535	27360	159926	175806	121492	250029	24335
2017-09	pathology	1096	14747		78037	121844	96621	1471957	195057	336031	220955	6849	137629	266220	80050	772216	814126	1434200	71821	336798	184390	1142621	8045	14747	30535	27360	159926	175806	121492	250029	24335
2017-09	pharmacology and toxicology	2441	32976		78037	121844	96621	1471957	195057	336031	220955	6849	137629	266220	80050	772216	814126	1434200	71821	336798	184390	1142621	8045	14747	32976	27360	159926	175806	121492	250029	24335
2017-09	physiology	2131	29491		78037	121844	96621	1471957	195057	336031	220955	6849	137629	266220	80050	772216	814126	1434200	71821	336798	184390	1142621	8045	14747	32976	29491	159926	175806	121492	250029	24335
2017-09	plant biology	12210	172136		78037	121844	96621	1471957	195057	336031	220955	6849	137629	266220	80050	772216	814126	1434200	71821	336798	184390	1142621	8045	14747	32976	29491	172136	175806	121492	250029	24335
2017-09	scientific communication and education	6911	182717		78037	121844	96621	1471957	195057	336031	220955	6849	137629	266220	80050	772216	814126	1434200	71821	336798	184390	1142621	8045	14747	32976	29491	172136	182717	121492	250029	24335
2017-09	synthetic biology	6279	127771		78037	121844	96621	1471957	195057	336031	220955	6849	137629	266220	80050	772216	814126	1434200	71821	336798	184390	1142621	8045	14747	32976	29491	172136	182717	127771	250029	24335
2017-09	systems biology	13730	263759		78037	121844	96621	1471957	195057	336031	220955	6849	137629	266220	80050	772216	814126	1434200	71821	336798	184390	1142621	8045	14747	32976	29491	172136	182717	127771	263759	24335
2017-09	zoology	1269	25604		78037	121844	96621	1471957	195057	336031	220955	6849	137629	266220	80050	772216	814126	1434200	71821	336798	184390	1142621	8045	14747	32976	29491	172136	182717	127771	263759	25604
2017-10	animal behavior and cognition	7156	85193		85193	121844	96621	1471957	195057	336031	220955	6849	137629	266220	80050	772216	814126	1434200	71821	336798	184390	1142621	8045	14747	32976	29491	172136	182717	127771	263759	25604
2017-10	biochemistry	13652	135496		85193	135496	96621	1471957	195057	336031	220955	6849	137629	266220	80050	772216	814126	1434200	71821	336798	184390	1142621	8045	14747	32976	29491	172136	182717	127771	263759	25604
2017-10	bioengineering	9491	106112		85193	135496	106112	1471957	195057	336031	220955	6849	137629	266220	80050	772216	814126	1434200	71821	336798	184390	1142621	8045	14747	32976	29491	172136	182717	127771	263759	25604
2017-10	bioinformatics	91454	1563411		85193	135496	106112	1563411	195057	336031	220955	6849	137629	266220	80050	772216	814126	1434200	71821	336798	184390	1142621	8045	14747	32976	29491	172136	182717	127771	263759	25604
2017-10	biophysics	18025	213082		85193	135496	106112	1563411	213082	336031	220955	6849	137629	266220	80050	772216	814126	1434200	71821	336798	184390	1142621	8045	14747	32976	29491	172136	182717	127771	263759	25604
2017-10	cancer biology	21426	357457		85193	135496	106112	1563411	213082	357457	220955	6849	137629	266220	80050	772216	814126	1434200	71821	336798	184390	1142621	8045	14747	32976	29491	172136	182717	127771	263759	25604
2017-10	cell biology	22986	243941		85193	135496	106112	1563411	213082	357457	243941	6849	137629	266220	80050	772216	814126	1434200	71821	336798	184390	1142621	8045	14747	32976	29491	172136	182717	127771	263759	25604
2017-10	clinical trials	868	7717		85193	135496	106112	1563411	213082	357457	243941	7717	137629	266220	80050	772216	814126	1434200	71821	336798	184390	1142621	8045	14747	32976	29491	172136	182717	127771	263759	25604
2017-10	developmental biology	13000	150629		85193	135496	106112	1563411	213082	357457	243941	7717	150629	266220	80050	772216	814126	1434200	71821	336798	184390	1142621	8045	14747	32976	29491	172136	182717	127771	263759	25604
2017-10	ecology	14827	281047		85193	135496	106112	1563411	213082	357457	243941	7717	150629	281047	80050	772216	814126	1434200	71821	336798	184390	1142621	8045	14747	32976	29491	172136	182717	127771	263759	25604
2017-10	epidemiology	10640	90690		85193	135496	106112	1563411	213082	357457	243941	7717	150629	281047	90690	772216	814126	1434200	71821	336798	184390	1142621	8045	14747	32976	29491	172136	182717	127771	263759	25604
2017-10	evolutionary biology	40594	812810		85193	135496	106112	1563411	213082	357457	243941	7717	150629	281047	90690	812810	814126	1434200	71821	336798	184390	1142621	8045	14747	32976	29491	172136	182717	127771	263759	25604
2017-10	genetics	48433	862559		85193	135496	106112	1563411	213082	357457	243941	7717	150629	281047	90690	812810	862559	1434200	71821	336798	184390	1142621	8045	14747	32976	29491	172136	182717	127771	263759	25604
2017-10	genomics	95810	1530010		85193	135496	106112	1563411	213082	357457	243941	7717	150629	281047	90690	812810	862559	1530010	71821	336798	184390	1142621	8045	14747	32976	29491	172136	182717	127771	263759	25604
2017-10	immunology	5789	77610		85193	135496	106112	1563411	213082	357457	243941	7717	150629	281047	90690	812810	862559	1530010	77610	336798	184390	1142621	8045	14747	32976	29491	172136	182717	127771	263759	25604
2017-10	microbiology	26580	363378		85193	135496	106112	1563411	213082	357457	243941	7717	150629	281047	90690	812810	862559	1530010	77610	363378	184390	1142621	8045	14747	32976	29491	172136	182717	127771	263759	25604
2017-10	molecular biology	14334	198724		85193	135496	106112	1563411	213082	357457	243941	7717	150629	281047	90690	812810	862559	1530010	77610	363378	198724	1142621	8045	14747	32976	29491	172136	182717	127771	263759	25604
2017-10	neuroscience	118453	1261074		85193	135496	106112	1563411	213082	357457	243941	7717	150629	281047	90690	812810	862559	1530010	77610	363378	198724	1261074	8045	14747	32976	29491	172136	182717	127771	263759	25604
2017-10	paleontology	419	8464		85193	135496	106112	1563411	213082	357457	243941	7717	150629	281047	90690	812810	862559	1530010	77610	363378	198724	1261074	8464	14747	32976	29491	172136	182717	127771	263759	25604
2017-10	pathology	1315	16062		85193	135496	106112	1563411	213082	357457	243941	7717	150629	281047	90690	812810	862559	1530010	77610	363378	198724	1261074	8464	16062	32976	29491	172136	182717	127771	263759	25604
2017-10	pharmacology and toxicology	2620	35596		85193	135496	106112	1563411	213082	357457	243941	7717	150629	281047	90690	812810	862559	1530010	77610	363378	198724	1261074	8464	16062	35596	29491	172136	182717	127771	263759	25604
2017-10	physiology	2415	31906		85193	135496	106112	1563411	213082	357457	243941	7717	150629	281047	90690	812810	862559	1530010	77610	363378	198724	1261074	8464	16062	35596	31906	172136	182717	127771	263759	25604
2017-10	plant biology	13417	185553		85193	135496	106112	1563411	213082	357457	243941	7717	150629	281047	90690	812810	862559	1530010	77610	363378	198724	1261074	8464	16062	35596	31906	185553	182717	127771	263759	25604
2017-10	scientific communication and education	7411	190128		85193	135496	106112	1563411	213082	357457	243941	7717	150629	281047	90690	812810	862559	1530010	77610	363378	198724	1261074	8464	16062	35596	31906	185553	190128	127771	263759	25604
2017-10	synthetic biology	7185	134956		85193	135496	106112	1563411	213082	357457	243941	7717	150629	281047	90690	812810	862559	1530010	77610	363378	198724	1261074	8464	16062	35596	31906	185553	190128	134956	263759	25604
2017-10	systems biology	16232	279991		85193	135496	106112	1563411	213082	357457	243941	7717	150629	281047	90690	812810	862559	1530010	77610	363378	198724	1261074	8464	16062	35596	31906	185553	190128	134956	279991	25604
2017-10	zoology	2076	27680		85193	135496	106112	1563411	213082	357457	243941	7717	150629	281047	90690	812810	862559	1530010	77610	363378	198724	1261074	8464	16062	35596	31906	185553	190128	134956	279991	27680
2017-11	animal behavior and cognition	9148	94341		94341	135496	106112	1563411	213082	357457	243941	7717	150629	281047	90690	812810	862559	1530010	77610	363378	198724	1261074	8464	16062	35596	31906	185553	190128	134956	279991	27680
2017-11	biochemistry	13823	149319		94341	149319	106112	1563411	213082	357457	243941	7717	150629	281047	90690	812810	862559	1530010	77610	363378	198724	1261074	8464	16062	35596	31906	185553	190128	134956	279991	27680
2017-11	bioengineering	9897	116009		94341	149319	116009	1563411	213082	357457	243941	7717	150629	281047	90690	812810	862559	1530010	77610	363378	198724	1261074	8464	16062	35596	31906	185553	190128	134956	279991	27680
2017-11	bioinformatics	97236	1660647		94341	149319	116009	1660647	213082	357457	243941	7717	150629	281047	90690	812810	862559	1530010	77610	363378	198724	1261074	8464	16062	35596	31906	185553	190128	134956	279991	27680
2017-11	biophysics	16915	229997		94341	149319	116009	1660647	229997	357457	243941	7717	150629	281047	90690	812810	862559	1530010	77610	363378	198724	1261074	8464	16062	35596	31906	185553	190128	134956	279991	27680
2017-11	cancer biology	18763	376220		94341	149319	116009	1660647	229997	376220	243941	7717	150629	281047	90690	812810	862559	1530010	77610	363378	198724	1261074	8464	16062	35596	31906	185553	190128	134956	279991	27680
2017-11	cell biology	23901	267842		94341	149319	116009	1660647	229997	376220	267842	7717	150629	281047	90690	812810	862559	1530010	77610	363378	198724	1261074	8464	16062	35596	31906	185553	190128	134956	279991	27680
2017-11	clinical trials	1882	9599		94341	149319	116009	1660647	229997	376220	267842	9599	150629	281047	90690	812810	862559	1530010	77610	363378	198724	1261074	8464	16062	35596	31906	185553	190128	134956	279991	27680
2017-11	developmental biology	13684	164313		94341	149319	116009	1660647	229997	376220	267842	9599	164313	281047	90690	812810	862559	1530010	77610	363378	198724	1261074	8464	16062	35596	31906	185553	190128	134956	279991	27680
2017-11	ecology	16817	297864		94341	149319	116009	1660647	229997	376220	267842	9599	164313	297864	90690	812810	862559	1530010	77610	363378	198724	1261074	8464	16062	35596	31906	185553	190128	134956	279991	27680
2017-11	epidemiology	9615	100305		94341	149319	116009	1660647	229997	376220	267842	9599	164313	297864	100305	812810	862559	1530010	77610	363378	198724	1261074	8464	16062	35596	31906	185553	190128	134956	279991	27680
2017-11	evolutionary biology	42834	855644		94341	149319	116009	1660647	229997	376220	267842	9599	164313	297864	100305	855644	862559	1530010	77610	363378	198724	1261074	8464	16062	35596	31906	185553	190128	134956	279991	27680
2017-11	genetics	47317	909876		94341	149319	116009	1660647	229997	376220	267842	9599	164313	297864	100305	855644	909876	1530010	77610	363378	198724	1261074	8464	16062	35596	31906	185553	190128	134956	279991	27680
2017-11	genomics	89457	1619467		94341	149319	116009	1660647	229997	376220	267842	9599	164313	297864	100305	855644	909876	1619467	77610	363378	198724	1261074	8464	16062	35596	31906	185553	190128	134956	279991	27680
2017-11	immunology	8269	85879		94341	149319	116009	1660647	229997	376220	267842	9599	164313	297864	100305	855644	909876	1619467	85879	363378	198724	1261074	8464	16062	35596	31906	185553	190128	134956	279991	27680
2017-11	microbiology	28856	392234		94341	149319	116009	1660647	229997	376220	267842	9599	164313	297864	100305	855644	909876	1619467	85879	392234	198724	1261074	8464	16062	35596	31906	185553	190128	134956	279991	27680
2017-11	molecular biology	16410	215134		94341	149319	116009	1660647	229997	376220	267842	9599	164313	297864	100305	855644	909876	1619467	85879	392234	215134	1261074	8464	16062	35596	31906	185553	190128	134956	279991	27680
2017-11	neuroscience	107791	1368865		94341	149319	116009	1660647	229997	376220	267842	9599	164313	297864	100305	855644	909876	1619467	85879	392234	215134	1368865	8464	16062	35596	31906	185553	190128	134956	279991	27680
2017-11	paleontology	2203	10667		94341	149319	116009	1660647	229997	376220	267842	9599	164313	297864	100305	855644	909876	1619467	85879	392234	215134	1368865	10667	16062	35596	31906	185553	190128	134956	279991	27680
2017-11	pathology	1243	17305		94341	149319	116009	1660647	229997	376220	267842	9599	164313	297864	100305	855644	909876	1619467	85879	392234	215134	1368865	10667	17305	35596	31906	185553	190128	134956	279991	27680
2017-11	pharmacology and toxicology	2337	37933		94341	149319	116009	1660647	229997	376220	267842	9599	164313	297864	100305	855644	909876	1619467	85879	392234	215134	1368865	10667	17305	37933	31906	185553	190128	134956	279991	27680
2017-11	physiology	2466	34372		94341	149319	116009	1660647	229997	376220	267842	9599	164313	297864	100305	855644	909876	1619467	85879	392234	215134	1368865	10667	17305	37933	34372	185553	190128	134956	279991	27680
2017-11	plant biology	13576	199129		94341	149319	116009	1660647	229997	376220	267842	9599	164313	297864	100305	855644	909876	1619467	85879	392234	215134	1368865	10667	17305	37933	34372	199129	190128	134956	279991	27680
2017-11	scientific communication and education	5840	195968		94341	149319	116009	1660647	229997	376220	267842	9599	164313	297864	100305	855644	909876	1619467	85879	392234	215134	1368865	10667	17305	37933	34372	199129	195968	134956	279991	27680
2017-11	synthetic biology	8363	143319		94341	149319	116009	1660647	229997	376220	267842	9599	164313	297864	100305	855644	909876	1619467	85879	392234	215134	1368865	10667	17305	37933	34372	199129	195968	143319	279991	27680
2017-11	systems biology	16244	296235		94341	149319	116009	1660647	229997	376220	267842	9599	164313	297864	100305	855644	909876	1619467	85879	392234	215134	1368865	10667	17305	37933	34372	199129	195968	143319	296235	27680
2017-11	zoology	1562	29242		94341	149319	116009	1660647	229997	376220	267842	9599	164313	297864	100305	855644	909876	1619467	85879	392234	215134	1368865	10667	17305	37933	34372	199129	195968	143319	296235	29242
2017-12	animal behavior and cognition	7973	102314		102314	149319	116009	1660647	229997	376220	267842	9599	164313	297864	100305	855644	909876	1619467	85879	392234	215134	1368865	10667	17305	37933	34372	199129	195968	143319	296235	29242
2017-12	biochemistry	9987	159306		102314	159306	116009	1660647	229997	376220	267842	9599	164313	297864	100305	855644	909876	1619467	85879	392234	215134	1368865	10667	17305	37933	34372	199129	195968	143319	296235	29242
2017-12	bioengineering	7423	123432		102314	159306	123432	1660647	229997	376220	267842	9599	164313	297864	100305	855644	909876	1619467	85879	392234	215134	1368865	10667	17305	37933	34372	199129	195968	143319	296235	29242
2017-12	bioinformatics	83581	1744228		102314	159306	123432	1744228	229997	376220	267842	9599	164313	297864	100305	855644	909876	1619467	85879	392234	215134	1368865	10667	17305	37933	34372	199129	195968	143319	296235	29242
2017-12	biophysics	15841	245838		102314	159306	123432	1744228	245838	376220	267842	9599	164313	297864	100305	855644	909876	1619467	85879	392234	215134	1368865	10667	17305	37933	34372	199129	195968	143319	296235	29242
2017-12	cancer biology	21499	397719		102314	159306	123432	1744228	245838	397719	267842	9599	164313	297864	100305	855644	909876	1619467	85879	392234	215134	1368865	10667	17305	37933	34372	199129	195968	143319	296235	29242
2017-12	cell biology	21037	288879		102314	159306	123432	1744228	245838	397719	288879	9599	164313	297864	100305	855644	909876	1619467	85879	392234	215134	1368865	10667	17305	37933	34372	199129	195968	143319	296235	29242
2017-12	clinical trials	837	10436		102314	159306	123432	1744228	245838	397719	288879	10436	164313	297864	100305	855644	909876	1619467	85879	392234	215134	1368865	10667	17305	37933	34372	199129	195968	143319	296235	29242
2017-12	developmental biology	11292	175605		102314	159306	123432	1744228	245838	397719	288879	10436	175605	297864	100305	855644	909876	1619467	85879	392234	215134	1368865	10667	17305	37933	34372	199129	195968	143319	296235	29242
2017-12	ecology	13087	310951		102314	159306	123432	1744228	245838	397719	288879	10436	175605	310951	100305	855644	909876	1619467	85879	392234	215134	1368865	10667	17305	37933	34372	199129	195968	143319	296235	29242
2017-12	epidemiology	7983	108288		102314	159306	123432	1744228	245838	397719	288879	10436	175605	310951	108288	855644	909876	1619467	85879	392234	215134	1368865	10667	17305	37933	34372	199129	195968	143319	296235	29242
2017-12	evolutionary biology	35388	891032		102314	159306	123432	1744228	245838	397719	288879	10436	175605	310951	108288	891032	909876	1619467	85879	392234	215134	1368865	10667	17305	37933	34372	199129	195968	143319	296235	29242
2017-12	genetics	38261	948137		102314	159306	123432	1744228	245838	397719	288879	10436	175605	310951	108288	891032	948137	1619467	85879	392234	215134	1368865	10667	17305	37933	34372	199129	195968	143319	296235	29242
2017-12	genomics	82796	1702263		102314	159306	123432	1744228	245838	397719	288879	10436	175605	310951	108288	891032	948137	1702263	85879	392234	215134	1368865	10667	17305	37933	34372	199129	195968	143319	296235	29242
2017-12	immunology	6678	92557		102314	159306	123432	1744228	245838	397719	288879	10436	175605	310951	108288	891032	948137	1702263	92557	392234	215134	1368865	10667	17305	37933	34372	199129	195968	143319	296235	29242
2017-12	microbiology	24247	416481		102314	159306	123432	1744228	245838	397719	288879	10436	175605	310951	108288	891032	948137	1702263	92557	416481	215134	1368865	10667	17305	37933	34372	199129	195968	143319	296235	29242
2017-12	molecular biology	11094	226228		102314	159306	123432	1744228	245838	397719	288879	10436	175605	310951	108288	891032	948137	1702263	92557	416481	226228	1368865	10667	17305	37933	34372	199129	195968	143319	296235	29242
2017-12	neuroscience	93626	1462491		102314	159306	123432	1744228	245838	397719	288879	10436	175605	310951	108288	891032	948137	1702263	92557	416481	226228	1462491	10667	17305	37933	34372	199129	195968	143319	296235	29242
2017-12	paleontology	624	11291		102314	159306	123432	1744228	245838	397719	288879	10436	175605	310951	108288	891032	948137	1702263	92557	416481	226228	1462491	11291	17305	37933	34372	199129	195968	143319	296235	29242
2017-12	pathology	1220	18525		102314	159306	123432	1744228	245838	397719	288879	10436	175605	310951	108288	891032	948137	1702263	92557	416481	226228	1462491	11291	18525	37933	34372	199129	195968	143319	296235	29242
2017-12	pharmacology and toxicology	1875	39808		102314	159306	123432	1744228	245838	397719	288879	10436	175605	310951	108288	891032	948137	1702263	92557	416481	226228	1462491	11291	18525	39808	34372	199129	195968	143319	296235	29242
2017-12	physiology	1743	36115		102314	159306	123432	1744228	245838	397719	288879	10436	175605	310951	108288	891032	948137	1702263	92557	416481	226228	1462491	11291	18525	39808	36115	199129	195968	143319	296235	29242
2017-12	plant biology	11525	210654		102314	159306	123432	1744228	245838	397719	288879	10436	175605	310951	108288	891032	948137	1702263	92557	416481	226228	1462491	11291	18525	39808	36115	210654	195968	143319	296235	29242
2017-12	scientific communication and education	7297	203265		102314	159306	123432	1744228	245838	397719	288879	10436	175605	310951	108288	891032	948137	1702263	92557	416481	226228	1462491	11291	18525	39808	36115	210654	203265	143319	296235	29242
2017-12	synthetic biology	6530	149849		102314	159306	123432	1744228	245838	397719	288879	10436	175605	310951	108288	891032	948137	1702263	92557	416481	226228	1462491	11291	18525	39808	36115	210654	203265	149849	296235	29242
2017-12	systems biology	15659	311894		102314	159306	123432	1744228	245838	397719	288879	10436	175605	310951	108288	891032	948137	1702263	92557	416481	226228	1462491	11291	18525	39808	36115	210654	203265	149849	311894	29242
2017-12	zoology	1672	30914		102314	159306	123432	1744228	245838	397719	288879	10436	175605	310951	108288	891032	948137	1702263	92557	416481	226228	1462491	11291	18525	39808	36115	210654	203265	149849	311894	30914
2018-01	animal behavior and cognition	8265	110579		110579	159306	123432	1744228	245838	397719	288879	10436	175605	310951	108288	891032	948137	1702263	92557	416481	226228	1462491	11291	18525	39808	36115	210654	203265	149849	311894	30914
2018-01	biochemistry	14878	174184		110579	174184	123432	1744228	245838	397719	288879	10436	175605	310951	108288	891032	948137	1702263	92557	416481	226228	1462491	11291	18525	39808	36115	210654	203265	149849	311894	30914
2018-01	bioengineering	9463	132895		110579	174184	132895	1744228	245838	397719	288879	10436	175605	310951	108288	891032	948137	1702263	92557	416481	226228	1462491	11291	18525	39808	36115	210654	203265	149849	311894	30914
2018-01	bioinformatics	99187	1843415		110579	174184	132895	1843415	245838	397719	288879	10436	175605	310951	108288	891032	948137	1702263	92557	416481	226228	1462491	11291	18525	39808	36115	210654	203265	149849	311894	30914
2018-01	biophysics	19780	265618		110579	174184	132895	1843415	265618	397719	288879	10436	175605	310951	108288	891032	948137	1702263	92557	416481	226228	1462491	11291	18525	39808	36115	210654	203265	149849	311894	30914
2018-01	cancer biology	21978	419697		110579	174184	132895	1843415	265618	419697	288879	10436	175605	310951	108288	891032	948137	1702263	92557	416481	226228	1462491	11291	18525	39808	36115	210654	203265	149849	311894	30914
2018-01	cell biology	36215	325094		110579	174184	132895	1843415	265618	419697	325094	10436	175605	310951	108288	891032	948137	1702263	92557	416481	226228	1462491	11291	18525	39808	36115	210654	203265	149849	311894	30914
2018-01	clinical trials	1028	11464		110579	174184	132895	1843415	265618	419697	325094	11464	175605	310951	108288	891032	948137	1702263	92557	416481	226228	1462491	11291	18525	39808	36115	210654	203265	149849	311894	30914
2018-01	developmental biology	15065	190670		110579	174184	132895	1843415	265618	419697	325094	11464	190670	310951	108288	891032	948137	1702263	92557	416481	226228	1462491	11291	18525	39808	36115	210654	203265	149849	311894	30914
2018-01	ecology	15852	326803		110579	174184	132895	1843415	265618	419697	325094	11464	190670	326803	108288	891032	948137	1702263	92557	416481	226228	1462491	11291	18525	39808	36115	210654	203265	149849	311894	30914
2018-01	epidemiology	9394	117682		110579	174184	132895	1843415	265618	419697	325094	11464	190670	326803	117682	891032	948137	1702263	92557	416481	226228	1462491	11291	18525	39808	36115	210654	203265	149849	311894	30914
2018-01	evolutionary biology	43392	934424		110579	174184	132895	1843415	265618	419697	325094	11464	190670	326803	117682	934424	948137	1702263	92557	416481	226228	1462491	11291	18525	39808	36115	210654	203265	149849	311894	30914
2018-01	genetics	52626	1000763		110579	174184	132895	1843415	265618	419697	325094	11464	190670	326803	117682	934424	1000763	1702263	92557	416481	226228	1462491	11291	18525	39808	36115	210654	203265	149849	311894	30914
2018-01	genomics	80886	1783149		110579	174184	132895	1843415	265618	419697	325094	11464	190670	326803	117682	934424	1000763	1783149	92557	416481	226228	1462491	11291	18525	39808	36115	210654	203265	149849	311894	30914
2018-01	immunology	26370	118927		110579	174184	132895	1843415	265618	419697	325094	11464	190670	326803	117682	934424	1000763	1783149	118927	416481	226228	1462491	11291	18525	39808	36115	210654	203265	149849	311894	30914
2018-01	microbiology	31399	447880		110579	174184	132895	1843415	265618	419697	325094	11464	190670	326803	117682	934424	1000763	1783149	118927	447880	226228	1462491	11291	18525	39808	36115	210654	203265	149849	311894	30914
2018-01	molecular biology	14893	241121		110579	174184	132895	1843415	265618	419697	325094	11464	190670	326803	117682	934424	1000763	1783149	118927	447880	241121	1462491	11291	18525	39808	36115	210654	203265	149849	311894	30914
2018-01	neuroscience	166549	1629040		110579	174184	132895	1843415	265618	419697	325094	11464	190670	326803	117682	934424	1000763	1783149	118927	447880	241121	1629040	11291	18525	39808	36115	210654	203265	149849	311894	30914
2018-01	paleontology	914	12205		110579	174184	132895	1843415	265618	419697	325094	11464	190670	326803	117682	934424	1000763	1783149	118927	447880	241121	1629040	12205	18525	39808	36115	210654	203265	149849	311894	30914
2018-01	pathology	1366	19891		110579	174184	132895	1843415	265618	419697	325094	11464	190670	326803	117682	934424	1000763	1783149	118927	447880	241121	1629040	12205	19891	39808	36115	210654	203265	149849	311894	30914
2018-01	pharmacology and toxicology	2076	41884		110579	174184	132895	1843415	265618	419697	325094	11464	190670	326803	117682	934424	1000763	1783149	118927	447880	241121	1629040	12205	19891	41884	36115	210654	203265	149849	311894	30914
2018-01	physiology	2730	38845		110579	174184	132895	1843415	265618	419697	325094	11464	190670	326803	117682	934424	1000763	1783149	118927	447880	241121	1629040	12205	19891	41884	38845	210654	203265	149849	311894	30914
2018-01	plant biology	17877	228531		110579	174184	132895	1843415	265618	419697	325094	11464	190670	326803	117682	934424	1000763	1783149	118927	447880	241121	1629040	12205	19891	41884	38845	228531	203265	149849	311894	30914
2018-01	scientific communication and education	8641	211906		110579	174184	132895	1843415	265618	419697	325094	11464	190670	326803	117682	934424	1000763	1783149	118927	447880	241121	1629040	12205	19891	41884	38845	228531	211906	149849	311894	30914
2018-01	synthetic biology	8056	157905		110579	174184	132895	1843415	265618	419697	325094	11464	190670	326803	117682	934424	1000763	1783149	118927	447880	241121	1629040	12205	19891	41884	38845	228531	211906	157905	311894	30914
2018-01	systems biology	18449	330343		110579	174184	132895	1843415	265618	419697	325094	11464	190670	326803	117682	934424	1000763	1783149	118927	447880	241121	1629040	12205	19891	41884	38845	228531	211906	157905	330343	30914
2018-01	zoology	2085	32999		110579	174184	132895	1843415	265618	419697	325094	11464	190670	326803	117682	934424	1000763	1783149	118927	447880	241121	1629040	12205	19891	41884	38845	228531	211906	157905	330343	32999
2018-02	animal behavior and cognition	9028	119607		119607	174184	132895	1843415	265618	419697	325094	11464	190670	326803	117682	934424	1000763	1783149	118927	447880	241121	1629040	12205	19891	41884	38845	228531	211906	157905	330343	32999
2018-02	biochemistry	14936	189120		119607	189120	132895	1843415	265618	419697	325094	11464	190670	326803	117682	934424	1000763	1783149	118927	447880	241121	1629040	12205	19891	41884	38845	228531	211906	157905	330343	32999
2018-02	bioengineering	12153	145048		119607	189120	145048	1843415	265618	419697	325094	11464	190670	326803	117682	934424	1000763	1783149	118927	447880	241121	1629040	12205	19891	41884	38845	228531	211906	157905	330343	32999
2018-02	bioinformatics	111737	1955152		119607	189120	145048	1955152	265618	419697	325094	11464	190670	326803	117682	934424	1000763	1783149	118927	447880	241121	1629040	12205	19891	41884	38845	228531	211906	157905	330343	32999
2018-02	biophysics	20462	286080		119607	189120	145048	1955152	286080	419697	325094	11464	190670	326803	117682	934424	1000763	1783149	118927	447880	241121	1629040	12205	19891	41884	38845	228531	211906	157905	330343	32999
2018-02	cancer biology	20750	440447		119607	189120	145048	1955152	286080	440447	325094	11464	190670	326803	117682	934424	1000763	1783149	118927	447880	241121	1629040	12205	19891	41884	38845	228531	211906	157905	330343	32999
2018-02	cell biology	26866	351960		119607	189120	145048	1955152	286080	440447	351960	11464	190670	326803	117682	934424	1000763	1783149	118927	447880	241121	1629040	12205	19891	41884	38845	228531	211906	157905	330343	32999
2018-02	clinical trials	1439	12903		119607	189120	145048	1955152	286080	440447	351960	12903	190670	326803	117682	934424	1000763	1783149	118927	447880	241121	1629040	12205	19891	41884	38845	228531	211906	157905	330343	32999
2018-02	developmental biology	15794	206464		119607	189120	145048	1955152	286080	440447	351960	12903	206464	326803	117682	934424	1000763	1783149	118927	447880	241121	1629040	12205	19891	41884	38845	228531	211906	157905	330343	32999
2018-02	ecology	18471	345274		119607	189120	145048	1955152	286080	440447	351960	12903	206464	345274	117682	934424	1000763	1783149	118927	447880	241121	1629040	12205	19891	41884	38845	228531	211906	157905	330343	32999
2018-02	epidemiology	11657	129339		119607	189120	145048	1955152	286080	440447	351960	12903	206464	345274	129339	934424	1000763	1783149	118927	447880	241121	1629040	12205	19891	41884	38845	228531	211906	157905	330343	32999
2018-02	evolutionary biology	45187	979611		119607	189120	145048	1955152	286080	440447	351960	12903	206464	345274	129339	979611	1000763	1783149	118927	447880	241121	1629040	12205	19891	41884	38845	228531	211906	157905	330343	32999
2018-02	genetics	53484	1054247		119607	189120	145048	1955152	286080	440447	351960	12903	206464	345274	129339	979611	1054247	1783149	118927	447880	241121	1629040	12205	19891	41884	38845	228531	211906	157905	330343	32999
2018-02	genomics	84143	1867292		119607	189120	145048	1955152	286080	440447	351960	12903	206464	345274	129339	979611	1054247	1867292	118927	447880	241121	1629040	12205	19891	41884	38845	228531	211906	157905	330343	32999
2018-02	immunology	9825	128752		119607	189120	145048	1955152	286080	440447	351960	12903	206464	345274	129339	979611	1054247	1867292	128752	447880	241121	1629040	12205	19891	41884	38845	228531	211906	157905	330343	32999
2018-02	microbiology	32093	479973		119607	189120	145048	1955152	286080	440447	351960	12903	206464	345274	129339	979611	1054247	1867292	128752	479973	241121	1629040	12205	19891	41884	38845	228531	211906	157905	330343	32999
2018-02	molecular biology	16592	257713		119607	189120	145048	1955152	286080	440447	351960	12903	206464	345274	129339	979611	1054247	1867292	128752	479973	257713	1629040	12205	19891	41884	38845	228531	211906	157905	330343	32999
2018-02	neuroscience	128413	1757453		119607	189120	145048	1955152	286080	440447	351960	12903	206464	345274	129339	979611	1054247	1867292	128752	479973	257713	1757453	12205	19891	41884	38845	228531	211906	157905	330343	32999
2018-02	paleontology	625	12830		119607	189120	145048	1955152	286080	440447	351960	12903	206464	345274	129339	979611	1054247	1867292	128752	479973	257713	1757453	12830	19891	41884	38845	228531	211906	157905	330343	32999
2018-02	pathology	2194	22085		119607	189120	145048	1955152	286080	440447	351960	12903	206464	345274	129339	979611	1054247	1867292	128752	479973	257713	1757453	12830	22085	41884	38845	228531	211906	157905	330343	32999
2018-02	pharmacology and toxicology	2622	44506		119607	189120	145048	1955152	286080	440447	351960	12903	206464	345274	129339	979611	1054247	1867292	128752	479973	257713	1757453	12830	22085	44506	38845	228531	211906	157905	330343	32999
2018-02	physiology	3001	41846		119607	189120	145048	1955152	286080	440447	351960	12903	206464	345274	129339	979611	1054247	1867292	128752	479973	257713	1757453	12830	22085	44506	41846	228531	211906	157905	330343	32999
2018-02	plant biology	15139	243670		119607	189120	145048	1955152	286080	440447	351960	12903	206464	345274	129339	979611	1054247	1867292	128752	479973	257713	1757453	12830	22085	44506	41846	243670	211906	157905	330343	32999
2018-02	scientific communication and education	7529	219435		119607	189120	145048	1955152	286080	440447	351960	12903	206464	345274	129339	979611	1054247	1867292	128752	479973	257713	1757453	12830	22085	44506	41846	243670	219435	157905	330343	32999
2018-02	synthetic biology	7261	165166		119607	189120	145048	1955152	286080	440447	351960	12903	206464	345274	129339	979611	1054247	1867292	128752	479973	257713	1757453	12830	22085	44506	41846	243670	219435	165166	330343	32999
2018-02	systems biology	20626	350969		119607	189120	145048	1955152	286080	440447	351960	12903	206464	345274	129339	979611	1054247	1867292	128752	479973	257713	1757453	12830	22085	44506	41846	243670	219435	165166	350969	32999
2018-02	zoology	1971	34970		119607	189120	145048	1955152	286080	440447	351960	12903	206464	345274	129339	979611	1054247	1867292	128752	479973	257713	1757453	12830	22085	44506	41846	243670	219435	165166	350969	34970
2018-03	animal behavior and cognition	8328	127935		127935	189120	145048	1955152	286080	440447	351960	12903	206464	345274	129339	979611	1054247	1867292	128752	479973	257713	1757453	12830	22085	44506	41846	243670	219435	165166	350969	34970
2018-03	biochemistry	15295	204415		127935	204415	145048	1955152	286080	440447	351960	12903	206464	345274	129339	979611	1054247	1867292	128752	479973	257713	1757453	12830	22085	44506	41846	243670	219435	165166	350969	34970
2018-03	bioengineering	14016	159064		127935	204415	159064	1955152	286080	440447	351960	12903	206464	345274	129339	979611	1054247	1867292	128752	479973	257713	1757453	12830	22085	44506	41846	243670	219435	165166	350969	34970
2018-03	bioinformatics	115849	2071001		127935	204415	159064	2071001	286080	440447	351960	12903	206464	345274	129339	979611	1054247	1867292	128752	479973	257713	1757453	12830	22085	44506	41846	243670	219435	165166	350969	34970
2018-03	biophysics	27430	313510		127935	204415	159064	2071001	313510	440447	351960	12903	206464	345274	129339	979611	1054247	1867292	128752	479973	257713	1757453	12830	22085	44506	41846	243670	219435	165166	350969	34970
2018-03	cancer biology	23173	463620		127935	204415	159064	2071001	313510	463620	351960	12903	206464	345274	129339	979611	1054247	1867292	128752	479973	257713	1757453	12830	22085	44506	41846	243670	219435	165166	350969	34970
2018-03	cell biology	30803	382763		127935	204415	159064	2071001	313510	463620	382763	12903	206464	345274	129339	979611	1054247	1867292	128752	479973	257713	1757453	12830	22085	44506	41846	243670	219435	165166	350969	34970
2018-03	clinical trials	1428	14331		127935	204415	159064	2071001	313510	463620	382763	14331	206464	345274	129339	979611	1054247	1867292	128752	479973	257713	1757453	12830	22085	44506	41846	243670	219435	165166	350969	34970
2018-03	developmental biology	16288	222752		127935	204415	159064	2071001	313510	463620	382763	14331	222752	345274	129339	979611	1054247	1867292	128752	479973	257713	1757453	12830	22085	44506	41846	243670	219435	165166	350969	34970
2018-03	ecology	19010	364284		127935	204415	159064	2071001	313510	463620	382763	14331	222752	364284	129339	979611	1054247	1867292	128752	479973	257713	1757453	12830	22085	44506	41846	243670	219435	165166	350969	34970
2018-03	epidemiology	13471	142810		127935	204415	159064	2071001	313510	463620	382763	14331	222752	364284	142810	979611	1054247	1867292	128752	479973	257713	1757453	12830	22085	44506	41846	243670	219435	165166	350969	34970
2018-03	evolutionary biology	48144	1027755		127935	204415	159064	2071001	313510	463620	382763	14331	222752	364284	142810	1027755	1054247	1867292	128752	479973	257713	1757453	12830	22085	44506	41846	243670	219435	165166	350969	34970
2018-03	genetics	54712	1108959		127935	204415	159064	2071001	313510	463620	382763	14331	222752	364284	142810	1027755	1108959	1867292	128752	479973	257713	1757453	12830	22085	44506	41846	243670	219435	165166	350969	34970
2018-03	genomics	125606	1992898		127935	204415	159064	2071001	313510	463620	382763	14331	222752	364284	142810	1027755	1108959	1992898	128752	479973	257713	1757453	12830	22085	44506	41846	243670	219435	165166	350969	34970
2018-03	immunology	11185	139937		127935	204415	159064	2071001	313510	463620	382763	14331	222752	364284	142810	1027755	1108959	1992898	139937	479973	257713	1757453	12830	22085	44506	41846	243670	219435	165166	350969	34970
2018-03	microbiology	36186	516159		127935	204415	159064	2071001	313510	463620	382763	14331	222752	364284	142810	1027755	1108959	1992898	139937	516159	257713	1757453	12830	22085	44506	41846	243670	219435	165166	350969	34970
2018-03	molecular biology	20833	278546		127935	204415	159064	2071001	313510	463620	382763	14331	222752	364284	142810	1027755	1108959	1992898	139937	516159	278546	1757453	12830	22085	44506	41846	243670	219435	165166	350969	34970
2018-03	neuroscience	136402	1893855		127935	204415	159064	2071001	313510	463620	382763	14331	222752	364284	142810	1027755	1108959	1992898	139937	516159	278546	1893855	12830	22085	44506	41846	243670	219435	165166	350969	34970
2018-03	paleontology	606	13436		127935	204415	159064	2071001	313510	463620	382763	14331	222752	364284	142810	1027755	1108959	1992898	139937	516159	278546	1893855	13436	22085	44506	41846	243670	219435	165166	350969	34970
2018-03	pathology	2137	24222		127935	204415	159064	2071001	313510	463620	382763	14331	222752	364284	142810	1027755	1108959	1992898	139937	516159	278546	1893855	13436	24222	44506	41846	243670	219435	165166	350969	34970
2018-03	pharmacology and toxicology	2806	47312		127935	204415	159064	2071001	313510	463620	382763	14331	222752	364284	142810	1027755	1108959	1992898	139937	516159	278546	1893855	13436	24222	47312	41846	243670	219435	165166	350969	34970
2018-03	physiology	3020	44866		127935	204415	159064	2071001	313510	463620	382763	14331	222752	364284	142810	1027755	1108959	1992898	139937	516159	278546	1893855	13436	24222	47312	44866	243670	219435	165166	350969	34970
2018-03	plant biology	15763	259433		127935	204415	159064	2071001	313510	463620	382763	14331	222752	364284	142810	1027755	1108959	1992898	139937	516159	278546	1893855	13436	24222	47312	44866	259433	219435	165166	350969	34970
2018-03	scientific communication and education	9299	228734		127935	204415	159064	2071001	313510	463620	382763	14331	222752	364284	142810	1027755	1108959	1992898	139937	516159	278546	1893855	13436	24222	47312	44866	259433	228734	165166	350969	34970
2018-03	synthetic biology	8872	174038		127935	204415	159064	2071001	313510	463620	382763	14331	222752	364284	142810	1027755	1108959	1992898	139937	516159	278546	1893855	13436	24222	47312	44866	259433	228734	174038	350969	34970
2018-03	systems biology	24014	374983		127935	204415	159064	2071001	313510	463620	382763	14331	222752	364284	142810	1027755	1108959	1992898	139937	516159	278546	1893855	13436	24222	47312	44866	259433	228734	174038	374983	34970
2018-03	zoology	3036	38006		127935	204415	159064	2071001	313510	463620	382763	14331	222752	364284	142810	1027755	1108959	1992898	139937	516159	278546	1893855	13436	24222	47312	44866	259433	228734	174038	374983	38006
2018-04	animal behavior and cognition	7763	135698		135698	204415	159064	2071001	313510	463620	382763	14331	222752	364284	142810	1027755	1108959	1992898	139937	516159	278546	1893855	13436	24222	47312	44866	259433	228734	174038	374983	38006
2018-04	biochemistry	14493	218908		135698	218908	159064	2071001	313510	463620	382763	14331	222752	364284	142810	1027755	1108959	1992898	139937	516159	278546	1893855	13436	24222	47312	44866	259433	228734	174038	374983	38006
2018-04	bioengineering	11844	170908		135698	218908	170908	2071001	313510	463620	382763	14331	222752	364284	142810	1027755	1108959	1992898	139937	516159	278546	1893855	13436	24222	47312	44866	259433	228734	174038	374983	38006
2018-04	bioinformatics	118016	2189017		135698	218908	170908	2189017	313510	463620	382763	14331	222752	364284	142810	1027755	1108959	1992898	139937	516159	278546	1893855	13436	24222	47312	44866	259433	228734	174038	374983	38006
2018-04	biophysics	30934	344444		135698	218908	170908	2189017	344444	463620	382763	14331	222752	364284	142810	1027755	1108959	1992898	139937	516159	278546	1893855	13436	24222	47312	44866	259433	228734	174038	374983	38006
2018-04	cancer biology	23190	486810		135698	218908	170908	2189017	344444	486810	382763	14331	222752	364284	142810	1027755	1108959	1992898	139937	516159	278546	1893855	13436	24222	47312	44866	259433	228734	174038	374983	38006
2018-04	cell biology	31857	414620		135698	218908	170908	2189017	344444	486810	414620	14331	222752	364284	142810	1027755	1108959	1992898	139937	516159	278546	1893855	13436	24222	47312	44866	259433	228734	174038	374983	38006
2018-04	clinical trials	1224	15555		135698	218908	170908	2189017	344444	486810	414620	15555	222752	364284	142810	1027755	1108959	1992898	139937	516159	278546	1893855	13436	24222	47312	44866	259433	228734	174038	374983	38006
2018-04	developmental biology	16041	238793		135698	218908	170908	2189017	344444	486810	414620	15555	238793	364284	142810	1027755	1108959	1992898	139937	516159	278546	1893855	13436	24222	47312	44866	259433	228734	174038	374983	38006
2018-04	ecology	20151	384435		135698	218908	170908	2189017	344444	486810	414620	15555	238793	384435	142810	1027755	1108959	1992898	139937	516159	278546	1893855	13436	24222	47312	44866	259433	228734	174038	374983	38006
2018-04	epidemiology	13179	155989		135698	218908	170908	2189017	344444	486810	414620	15555	238793	384435	155989	1027755	1108959	1992898	139937	516159	278546	1893855	13436	24222	47312	44866	259433	228734	174038	374983	38006
2018-04	evolutionary biology	40622	1068377		135698	218908	170908	2189017	344444	486810	414620	15555	238793	384435	155989	1068377	1108959	1992898	139937	516159	278546	1893855	13436	24222	47312	44866	259433	228734	174038	374983	38006
2018-04	genetics	54884	1163843		135698	218908	170908	2189017	344444	486810	414620	15555	238793	384435	155989	1068377	1163843	1992898	139937	516159	278546	1893855	13436	24222	47312	44866	259433	228734	174038	374983	38006
2018-04	genomics	115631	2108529		135698	218908	170908	2189017	344444	486810	414620	15555	238793	384435	155989	1068377	1163843	2108529	139937	516159	278546	1893855	13436	24222	47312	44866	259433	228734	174038	374983	38006
2018-04	immunology	12568	152505		135698	218908	170908	2189017	344444	486810	414620	15555	238793	384435	155989	1068377	1163843	2108529	152505	516159	278546	1893855	13436	24222	47312	44866	259433	228734	174038	374983	38006
2018-04	microbiology	34782	550941		135698	218908	170908	2189017	344444	486810	414620	15555	238793	384435	155989	1068377	1163843	2108529	152505	550941	278546	1893855	13436	24222	47312	44866	259433	228734	174038	374983	38006
2018-04	molecular biology	17926	296472		135698	218908	170908	2189017	344444	486810	414620	15555	238793	384435	155989	1068377	1163843	2108529	152505	550941	296472	1893855	13436	24222	47312	44866	259433	228734	174038	374983	38006
2018-04	neuroscience	142823	2036678		135698	218908	170908	2189017	344444	486810	414620	15555	238793	384435	155989	1068377	1163843	2108529	152505	550941	296472	2036678	13436	24222	47312	44866	259433	228734	174038	374983	38006
2018-04	paleontology	571	14007		135698	218908	170908	2189017	344444	486810	414620	15555	238793	384435	155989	1068377	1163843	2108529	152505	550941	296472	2036678	14007	24222	47312	44866	259433	228734	174038	374983	38006
2018-04	pathology	2206	26428		135698	218908	170908	2189017	344444	486810	414620	15555	238793	384435	155989	1068377	1163843	2108529	152505	550941	296472	2036678	14007	26428	47312	44866	259433	228734	174038	374983	38006
2018-04	pharmacology and toxicology	2671	49983		135698	218908	170908	2189017	344444	486810	414620	15555	238793	384435	155989	1068377	1163843	2108529	152505	550941	296472	2036678	14007	26428	49983	44866	259433	228734	174038	374983	38006
2018-04	physiology	3034	47900		135698	218908	170908	2189017	344444	486810	414620	15555	238793	384435	155989	1068377	1163843	2108529	152505	550941	296472	2036678	14007	26428	49983	47900	259433	228734	174038	374983	38006
2018-04	plant biology	14426	273859		135698	218908	170908	2189017	344444	486810	414620	15555	238793	384435	155989	1068377	1163843	2108529	152505	550941	296472	2036678	14007	26428	49983	47900	273859	228734	174038	374983	38006
2018-04	scientific communication and education	6178	234912		135698	218908	170908	2189017	344444	486810	414620	15555	238793	384435	155989	1068377	1163843	2108529	152505	550941	296472	2036678	14007	26428	49983	47900	273859	234912	174038	374983	38006
2018-04	synthetic biology	9256	183294		135698	218908	170908	2189017	344444	486810	414620	15555	238793	384435	155989	1068377	1163843	2108529	152505	550941	296472	2036678	14007	26428	49983	47900	273859	234912	183294	374983	38006
2018-04	systems biology	23788	398771		135698	218908	170908	2189017	344444	486810	414620	15555	238793	384435	155989	1068377	1163843	2108529	152505	550941	296472	2036678	14007	26428	49983	47900	273859	234912	183294	398771	38006
2018-04	zoology	3041	41047		135698	218908	170908	2189017	344444	486810	414620	15555	238793	384435	155989	1068377	1163843	2108529	152505	550941	296472	2036678	14007	26428	49983	47900	273859	234912	183294	398771	41047
2018-05	animal behavior and cognition	10611	146309		146309	218908	170908	2189017	344444	486810	414620	15555	238793	384435	155989	1068377	1163843	2108529	152505	550941	296472	2036678	14007	26428	49983	47900	273859	234912	183294	398771	41047
2018-05	biochemistry	19137	238045		146309	238045	170908	2189017	344444	486810	414620	15555	238793	384435	155989	1068377	1163843	2108529	152505	550941	296472	2036678	14007	26428	49983	47900	273859	234912	183294	398771	41047
2018-05	bioengineering	13561	184469		146309	238045	184469	2189017	344444	486810	414620	15555	238793	384435	155989	1068377	1163843	2108529	152505	550941	296472	2036678	14007	26428	49983	47900	273859	234912	183294	398771	41047
2018-05	bioinformatics	120495	2309512		146309	238045	184469	2309512	344444	486810	414620	15555	238793	384435	155989	1068377	1163843	2108529	152505	550941	296472	2036678	14007	26428	49983	47900	273859	234912	183294	398771	41047
2018-05	biophysics	26264	370708		146309	238045	184469	2309512	370708	486810	414620	15555	238793	384435	155989	1068377	1163843	2108529	152505	550941	296472	2036678	14007	26428	49983	47900	273859	234912	183294	398771	41047
2018-05	cancer biology	26757	513567		146309	238045	184469	2309512	370708	513567	414620	15555	238793	384435	155989	1068377	1163843	2108529	152505	550941	296472	2036678	14007	26428	49983	47900	273859	234912	183294	398771	41047
2018-05	cell biology	34387	449007		146309	238045	184469	2309512	370708	513567	449007	15555	238793	384435	155989	1068377	1163843	2108529	152505	550941	296472	2036678	14007	26428	49983	47900	273859	234912	183294	398771	41047
2018-05	clinical trials	1657	17212		146309	238045	184469	2309512	370708	513567	449007	17212	238793	384435	155989	1068377	1163843	2108529	152505	550941	296472	2036678	14007	26428	49983	47900	273859	234912	183294	398771	41047
2018-05	developmental biology	18343	257136		146309	238045	184469	2309512	370708	513567	449007	17212	257136	384435	155989	1068377	1163843	2108529	152505	550941	296472	2036678	14007	26428	49983	47900	273859	234912	183294	398771	41047
2018-05	ecology	21025	405460		146309	238045	184469	2309512	370708	513567	449007	17212	257136	405460	155989	1068377	1163843	2108529	152505	550941	296472	2036678	14007	26428	49983	47900	273859	234912	183294	398771	41047
2018-05	epidemiology	12294	168283		146309	238045	184469	2309512	370708	513567	449007	17212	257136	405460	168283	1068377	1163843	2108529	152505	550941	296472	2036678	14007	26428	49983	47900	273859	234912	183294	398771	41047
2018-05	evolutionary biology	44543	1112920		146309	238045	184469	2309512	370708	513567	449007	17212	257136	405460	168283	1112920	1163843	2108529	152505	550941	296472	2036678	14007	26428	49983	47900	273859	234912	183294	398771	41047
2018-05	genetics	54994	1218837		146309	238045	184469	2309512	370708	513567	449007	17212	257136	405460	168283	1112920	1218837	2108529	152505	550941	296472	2036678	14007	26428	49983	47900	273859	234912	183294	398771	41047
2018-05	genomics	107378	2215907		146309	238045	184469	2309512	370708	513567	449007	17212	257136	405460	168283	1112920	1218837	2215907	152505	550941	296472	2036678	14007	26428	49983	47900	273859	234912	183294	398771	41047
2018-05	immunology	14410	166915		146309	238045	184469	2309512	370708	513567	449007	17212	257136	405460	168283	1112920	1218837	2215907	166915	550941	296472	2036678	14007	26428	49983	47900	273859	234912	183294	398771	41047
2018-05	microbiology	42843	593784		146309	238045	184469	2309512	370708	513567	449007	17212	257136	405460	168283	1112920	1218837	2215907	166915	593784	296472	2036678	14007	26428	49983	47900	273859	234912	183294	398771	41047
2018-05	molecular biology	23188	319660		146309	238045	184469	2309512	370708	513567	449007	17212	257136	405460	168283	1112920	1218837	2215907	166915	593784	319660	2036678	14007	26428	49983	47900	273859	234912	183294	398771	41047
2018-05	neuroscience	140740	2177418		146309	238045	184469	2309512	370708	513567	449007	17212	257136	405460	168283	1112920	1218837	2215907	166915	593784	319660	2177418	14007	26428	49983	47900	273859	234912	183294	398771	41047
2018-05	paleontology	745	14752		146309	238045	184469	2309512	370708	513567	449007	17212	257136	405460	168283	1112920	1218837	2215907	166915	593784	319660	2177418	14752	26428	49983	47900	273859	234912	183294	398771	41047
2018-05	pathology	2278	28706		146309	238045	184469	2309512	370708	513567	449007	17212	257136	405460	168283	1112920	1218837	2215907	166915	593784	319660	2177418	14752	28706	49983	47900	273859	234912	183294	398771	41047
2018-05	pharmacology and toxicology	2788	52771		146309	238045	184469	2309512	370708	513567	449007	17212	257136	405460	168283	1112920	1218837	2215907	166915	593784	319660	2177418	14752	28706	52771	47900	273859	234912	183294	398771	41047
2018-05	physiology	3637	51537		146309	238045	184469	2309512	370708	513567	449007	17212	257136	405460	168283	1112920	1218837	2215907	166915	593784	319660	2177418	14752	28706	52771	51537	273859	234912	183294	398771	41047
2018-05	plant biology	16418	290277		146309	238045	184469	2309512	370708	513567	449007	17212	257136	405460	168283	1112920	1218837	2215907	166915	593784	319660	2177418	14752	28706	52771	51537	290277	234912	183294	398771	41047
2018-05	scientific communication and education	7194	242106		146309	238045	184469	2309512	370708	513567	449007	17212	257136	405460	168283	1112920	1218837	2215907	166915	593784	319660	2177418	14752	28706	52771	51537	290277	242106	183294	398771	41047
2018-05	synthetic biology	11032	194326		146309	238045	184469	2309512	370708	513567	449007	17212	257136	405460	168283	1112920	1218837	2215907	166915	593784	319660	2177418	14752	28706	52771	51537	290277	242106	194326	398771	41047
2018-05	systems biology	22431	421202		146309	238045	184469	2309512	370708	513567	449007	17212	257136	405460	168283	1112920	1218837	2215907	166915	593784	319660	2177418	14752	28706	52771	51537	290277	242106	194326	421202	41047
2018-05	zoology	3426	44473		146309	238045	184469	2309512	370708	513567	449007	17212	257136	405460	168283	1112920	1218837	2215907	166915	593784	319660	2177418	14752	28706	52771	51537	290277	242106	194326	421202	44473
2018-06	animal behavior and cognition	10529	156838		156838	238045	184469	2309512	370708	513567	449007	17212	257136	405460	168283	1112920	1218837	2215907	166915	593784	319660	2177418	14752	28706	52771	51537	290277	242106	194326	421202	44473
2018-06	biochemistry	16267	254312		156838	254312	184469	2309512	370708	513567	449007	17212	257136	405460	168283	1112920	1218837	2215907	166915	593784	319660	2177418	14752	28706	52771	51537	290277	242106	194326	421202	44473
2018-06	bioengineering	13321	197790		156838	254312	197790	2309512	370708	513567	449007	17212	257136	405460	168283	1112920	1218837	2215907	166915	593784	319660	2177418	14752	28706	52771	51537	290277	242106	194326	421202	44473
2018-06	bioinformatics	113649	2423161		156838	254312	197790	2423161	370708	513567	449007	17212	257136	405460	168283	1112920	1218837	2215907	166915	593784	319660	2177418	14752	28706	52771	51537	290277	242106	194326	421202	44473
2018-06	biophysics	28504	399212		156838	254312	197790	2423161	399212	513567	449007	17212	257136	405460	168283	1112920	1218837	2215907	166915	593784	319660	2177418	14752	28706	52771	51537	290277	242106	194326	421202	44473
2018-06	cancer biology	22354	535921		156838	254312	197790	2423161	399212	535921	449007	17212	257136	405460	168283	1112920	1218837	2215907	166915	593784	319660	2177418	14752	28706	52771	51537	290277	242106	194326	421202	44473
2018-06	cell biology	31560	480567		156838	254312	197790	2423161	399212	535921	480567	17212	257136	405460	168283	1112920	1218837	2215907	166915	593784	319660	2177418	14752	28706	52771	51537	290277	242106	194326	421202	44473
2018-06	clinical trials	1375	18587		156838	254312	197790	2423161	399212	535921	480567	18587	257136	405460	168283	1112920	1218837	2215907	166915	593784	319660	2177418	14752	28706	52771	51537	290277	242106	194326	421202	44473
2018-06	developmental biology	19922	277058		156838	254312	197790	2423161	399212	535921	480567	18587	277058	405460	168283	1112920	1218837	2215907	166915	593784	319660	2177418	14752	28706	52771	51537	290277	242106	194326	421202	44473
2018-06	ecology	22334	427794		156838	254312	197790	2423161	399212	535921	480567	18587	277058	427794	168283	1112920	1218837	2215907	166915	593784	319660	2177418	14752	28706	52771	51537	290277	242106	194326	421202	44473
2018-06	epidemiology	11398	179681		156838	254312	197790	2423161	399212	535921	480567	18587	277058	427794	179681	1112920	1218837	2215907	166915	593784	319660	2177418	14752	28706	52771	51537	290277	242106	194326	421202	44473
2018-06	evolutionary biology	44910	1157830		156838	254312	197790	2423161	399212	535921	480567	18587	277058	427794	179681	1157830	1218837	2215907	166915	593784	319660	2177418	14752	28706	52771	51537	290277	242106	194326	421202	44473
2018-06	genetics	50053	1268890		156838	254312	197790	2423161	399212	535921	480567	18587	277058	427794	179681	1157830	1268890	2215907	166915	593784	319660	2177418	14752	28706	52771	51537	290277	242106	194326	421202	44473
2018-06	genomics	91745	2307652		156838	254312	197790	2423161	399212	535921	480567	18587	277058	427794	179681	1157830	1268890	2307652	166915	593784	319660	2177418	14752	28706	52771	51537	290277	242106	194326	421202	44473
2018-06	immunology	13924	180839		156838	254312	197790	2423161	399212	535921	480567	18587	277058	427794	179681	1157830	1268890	2307652	180839	593784	319660	2177418	14752	28706	52771	51537	290277	242106	194326	421202	44473
2018-06	microbiology	42686	636470		156838	254312	197790	2423161	399212	535921	480567	18587	277058	427794	179681	1157830	1268890	2307652	180839	636470	319660	2177418	14752	28706	52771	51537	290277	242106	194326	421202	44473
2018-06	molecular biology	24312	343972		156838	254312	197790	2423161	399212	535921	480567	18587	277058	427794	179681	1157830	1268890	2307652	180839	636470	343972	2177418	14752	28706	52771	51537	290277	242106	194326	421202	44473
2018-06	neuroscience	131808	2309226		156838	254312	197790	2423161	399212	535921	480567	18587	277058	427794	179681	1157830	1268890	2307652	180839	636470	343972	2309226	14752	28706	52771	51537	290277	242106	194326	421202	44473
2018-06	paleontology	977	15729		156838	254312	197790	2423161	399212	535921	480567	18587	277058	427794	179681	1157830	1268890	2307652	180839	636470	343972	2309226	15729	28706	52771	51537	290277	242106	194326	421202	44473
2018-06	pathology	2821	31527		156838	254312	197790	2423161	399212	535921	480567	18587	277058	427794	179681	1157830	1268890	2307652	180839	636470	343972	2309226	15729	31527	52771	51537	290277	242106	194326	421202	44473
2018-06	pharmacology and toxicology	2520	55291		156838	254312	197790	2423161	399212	535921	480567	18587	277058	427794	179681	1157830	1268890	2307652	180839	636470	343972	2309226	15729	31527	55291	51537	290277	242106	194326	421202	44473
2018-06	physiology	3453	54990		156838	254312	197790	2423161	399212	535921	480567	18587	277058	427794	179681	1157830	1268890	2307652	180839	636470	343972	2309226	15729	31527	55291	54990	290277	242106	194326	421202	44473
2018-06	plant biology	14563	304840		156838	254312	197790	2423161	399212	535921	480567	18587	277058	427794	179681	1157830	1268890	2307652	180839	636470	343972	2309226	15729	31527	55291	54990	304840	242106	194326	421202	44473
2018-06	scientific communication and education	6600	248706		156838	254312	197790	2423161	399212	535921	480567	18587	277058	427794	179681	1157830	1268890	2307652	180839	636470	343972	2309226	15729	31527	55291	54990	304840	248706	194326	421202	44473
2018-06	synthetic biology	12648	206974		156838	254312	197790	2423161	399212	535921	480567	18587	277058	427794	179681	1157830	1268890	2307652	180839	636470	343972	2309226	15729	31527	55291	54990	304840	248706	206974	421202	44473
2018-06	systems biology	26228	447430		156838	254312	197790	2423161	399212	535921	480567	18587	277058	427794	179681	1157830	1268890	2307652	180839	636470	343972	2309226	15729	31527	55291	54990	304840	248706	206974	447430	44473
2018-06	zoology	2040	46513		156838	254312	197790	2423161	399212	535921	480567	18587	277058	427794	179681	1157830	1268890	2307652	180839	636470	343972	2309226	15729	31527	55291	54990	304840	248706	206974	447430	46513
2018-07	animal behavior and cognition	11300	168138		168138	254312	197790	2423161	399212	535921	480567	18587	277058	427794	179681	1157830	1268890	2307652	180839	636470	343972	2309226	15729	31527	55291	54990	304840	248706	206974	447430	46513
2018-07	biochemistry	14372	268684		168138	268684	197790	2423161	399212	535921	480567	18587	277058	427794	179681	1157830	1268890	2307652	180839	636470	343972	2309226	15729	31527	55291	54990	304840	248706	206974	447430	46513
2018-07	bioengineering	11570	209360		168138	268684	209360	2423161	399212	535921	480567	18587	277058	427794	179681	1157830	1268890	2307652	180839	636470	343972	2309226	15729	31527	55291	54990	304840	248706	206974	447430	46513
2018-07	bioinformatics	117272	2540433		168138	268684	209360	2540433	399212	535921	480567	18587	277058	427794	179681	1157830	1268890	2307652	180839	636470	343972	2309226	15729	31527	55291	54990	304840	248706	206974	447430	46513
2018-07	biophysics	28857	428069		168138	268684	209360	2540433	428069	535921	480567	18587	277058	427794	179681	1157830	1268890	2307652	180839	636470	343972	2309226	15729	31527	55291	54990	304840	248706	206974	447430	46513
2018-07	cancer biology	29013	564934		168138	268684	209360	2540433	428069	564934	480567	18587	277058	427794	179681	1157830	1268890	2307652	180839	636470	343972	2309226	15729	31527	55291	54990	304840	248706	206974	447430	46513
2018-07	cell biology	32708	513275		168138	268684	209360	2540433	428069	564934	513275	18587	277058	427794	179681	1157830	1268890	2307652	180839	636470	343972	2309226	15729	31527	55291	54990	304840	248706	206974	447430	46513
2018-07	clinical trials	1236	19823		168138	268684	209360	2540433	428069	564934	513275	19823	277058	427794	179681	1157830	1268890	2307652	180839	636470	343972	2309226	15729	31527	55291	54990	304840	248706	206974	447430	46513
2018-07	developmental biology	20825	297883		168138	268684	209360	2540433	428069	564934	513275	19823	297883	427794	179681	1157830	1268890	2307652	180839	636470	343972	2309226	15729	31527	55291	54990	304840	248706	206974	447430	46513
2018-07	ecology	21550	449344		168138	268684	209360	2540433	428069	564934	513275	19823	297883	449344	179681	1157830	1268890	2307652	180839	636470	343972	2309226	15729	31527	55291	54990	304840	248706	206974	447430	46513
2018-07	epidemiology	14178	193859		168138	268684	209360	2540433	428069	564934	513275	19823	297883	449344	193859	1157830	1268890	2307652	180839	636470	343972	2309226	15729	31527	55291	54990	304840	248706	206974	447430	46513
2018-07	evolutionary biology	41131	1198961		168138	268684	209360	2540433	428069	564934	513275	19823	297883	449344	193859	1198961	1268890	2307652	180839	636470	343972	2309226	15729	31527	55291	54990	304840	248706	206974	447430	46513
2018-07	genetics	52024	1320914		168138	268684	209360	2540433	428069	564934	513275	19823	297883	449344	193859	1198961	1320914	2307652	180839	636470	343972	2309226	15729	31527	55291	54990	304840	248706	206974	447430	46513
2018-07	genomics	90649	2398301		168138	268684	209360	2540433	428069	564934	513275	19823	297883	449344	193859	1198961	1320914	2398301	180839	636470	343972	2309226	15729	31527	55291	54990	304840	248706	206974	447430	46513
2018-07	immunology	12910	193749		168138	268684	209360	2540433	428069	564934	513275	19823	297883	449344	193859	1198961	1320914	2398301	193749	636470	343972	2309226	15729	31527	55291	54990	304840	248706	206974	447430	46513
2018-07	microbiology	42415	678885		168138	268684	209360	2540433	428069	564934	513275	19823	297883	449344	193859	1198961	1320914	2398301	193749	678885	343972	2309226	15729	31527	55291	54990	304840	248706	206974	447430	46513
2018-07	molecular biology	23379	367351		168138	268684	209360	2540433	428069	564934	513275	19823	297883	449344	193859	1198961	1320914	2398301	193749	678885	367351	2309226	15729	31527	55291	54990	304840	248706	206974	447430	46513
2018-07	neuroscience	140390	2449616		168138	268684	209360	2540433	428069	564934	513275	19823	297883	449344	193859	1198961	1320914	2398301	193749	678885	367351	2449616	15729	31527	55291	54990	304840	248706	206974	447430	46513
2018-07	paleontology	1081	16810		168138	268684	209360	2540433	428069	564934	513275	19823	297883	449344	193859	1198961	1320914	2398301	193749	678885	367351	2449616	16810	31527	55291	54990	304840	248706	206974	447430	46513
2018-07	pathology	3191	34718		168138	268684	209360	2540433	428069	564934	513275	19823	297883	449344	193859	1198961	1320914	2398301	193749	678885	367351	2449616	16810	34718	55291	54990	304840	248706	206974	447430	46513
2018-07	pharmacology and toxicology	2689	57980		168138	268684	209360	2540433	428069	564934	513275	19823	297883	449344	193859	1198961	1320914	2398301	193749	678885	367351	2449616	16810	34718	57980	54990	304840	248706	206974	447430	46513
2018-07	physiology	3463	58453		168138	268684	209360	2540433	428069	564934	513275	19823	297883	449344	193859	1198961	1320914	2398301	193749	678885	367351	2449616	16810	34718	57980	58453	304840	248706	206974	447430	46513
2018-07	plant biology	16822	321662		168138	268684	209360	2540433	428069	564934	513275	19823	297883	449344	193859	1198961	1320914	2398301	193749	678885	367351	2449616	16810	34718	57980	58453	321662	248706	206974	447430	46513
2018-07	scientific communication and education	12521	261227		168138	268684	209360	2540433	428069	564934	513275	19823	297883	449344	193859	1198961	1320914	2398301	193749	678885	367351	2449616	16810	34718	57980	58453	321662	261227	206974	447430	46513
2018-07	synthetic biology	9652	216626		168138	268684	209360	2540433	428069	564934	513275	19823	297883	449344	193859	1198961	1320914	2398301	193749	678885	367351	2449616	16810	34718	57980	58453	321662	261227	216626	447430	46513
2018-07	systems biology	22920	470350		168138	268684	209360	2540433	428069	564934	513275	19823	297883	449344	193859	1198961	1320914	2398301	193749	678885	367351	2449616	16810	34718	57980	58453	321662	261227	216626	470350	46513
2018-07	zoology	1787	48300		168138	268684	209360	2540433	428069	564934	513275	19823	297883	449344	193859	1198961	1320914	2398301	193749	678885	367351	2449616	16810	34718	57980	58453	321662	261227	216626	470350	48300
2018-08	animal behavior and cognition	10737	178875		178875	268684	209360	2540433	428069	564934	513275	19823	297883	449344	193859	1198961	1320914	2398301	193749	678885	367351	2449616	16810	34718	57980	58453	321662	261227	216626	470350	48300
2018-08	biochemistry	19366	288050		178875	288050	209360	2540433	428069	564934	513275	19823	297883	449344	193859	1198961	1320914	2398301	193749	678885	367351	2449616	16810	34718	57980	58453	321662	261227	216626	470350	48300
2018-08	bioengineering	12551	221911		178875	288050	221911	2540433	428069	564934	513275	19823	297883	449344	193859	1198961	1320914	2398301	193749	678885	367351	2449616	16810	34718	57980	58453	321662	261227	216626	470350	48300
2018-08	bioinformatics	116237	2656670		178875	288050	221911	2656670	428069	564934	513275	19823	297883	449344	193859	1198961	1320914	2398301	193749	678885	367351	2449616	16810	34718	57980	58453	321662	261227	216626	470350	48300
2018-08	biophysics	28934	457003		178875	288050	221911	2656670	457003	564934	513275	19823	297883	449344	193859	1198961	1320914	2398301	193749	678885	367351	2449616	16810	34718	57980	58453	321662	261227	216626	470350	48300
2018-08	cancer biology	26908	591842		178875	288050	221911	2656670	457003	591842	513275	19823	297883	449344	193859	1198961	1320914	2398301	193749	678885	367351	2449616	16810	34718	57980	58453	321662	261227	216626	470350	48300
2018-08	cell biology	33494	546769		178875	288050	221911	2656670	457003	591842	546769	19823	297883	449344	193859	1198961	1320914	2398301	193749	678885	367351	2449616	16810	34718	57980	58453	321662	261227	216626	470350	48300
2018-08	clinical trials	1334	21157		178875	288050	221911	2656670	457003	591842	546769	21157	297883	449344	193859	1198961	1320914	2398301	193749	678885	367351	2449616	16810	34718	57980	58453	321662	261227	216626	470350	48300
2018-08	developmental biology	22985	320868		178875	288050	221911	2656670	457003	591842	546769	21157	320868	449344	193859	1198961	1320914	2398301	193749	678885	367351	2449616	16810	34718	57980	58453	321662	261227	216626	470350	48300
2018-08	ecology	21927	471271		178875	288050	221911	2656670	457003	591842	546769	21157	320868	471271	193859	1198961	1320914	2398301	193749	678885	367351	2449616	16810	34718	57980	58453	321662	261227	216626	470350	48300
2018-08	epidemiology	12313	206172		178875	288050	221911	2656670	457003	591842	546769	21157	320868	471271	206172	1198961	1320914	2398301	193749	678885	367351	2449616	16810	34718	57980	58453	321662	261227	216626	470350	48300
2018-08	evolutionary biology	40272	1239233		178875	288050	221911	2656670	457003	591842	546769	21157	320868	471271	206172	1239233	1320914	2398301	193749	678885	367351	2449616	16810	34718	57980	58453	321662	261227	216626	470350	48300
2018-08	genetics	52194	1373108		178875	288050	221911	2656670	457003	591842	546769	21157	320868	471271	206172	1239233	1373108	2398301	193749	678885	367351	2449616	16810	34718	57980	58453	321662	261227	216626	470350	48300
2018-08	genomics	93741	2492042		178875	288050	221911	2656670	457003	591842	546769	21157	320868	471271	206172	1239233	1373108	2492042	193749	678885	367351	2449616	16810	34718	57980	58453	321662	261227	216626	470350	48300
2018-08	immunology	15726	209475		178875	288050	221911	2656670	457003	591842	546769	21157	320868	471271	206172	1239233	1373108	2492042	209475	678885	367351	2449616	16810	34718	57980	58453	321662	261227	216626	470350	48300
2018-08	microbiology	50169	729054		178875	288050	221911	2656670	457003	591842	546769	21157	320868	471271	206172	1239233	1373108	2492042	209475	729054	367351	2449616	16810	34718	57980	58453	321662	261227	216626	470350	48300
2018-08	molecular biology	23903	391254		178875	288050	221911	2656670	457003	591842	546769	21157	320868	471271	206172	1239233	1373108	2492042	209475	729054	391254	2449616	16810	34718	57980	58453	321662	261227	216626	470350	48300
2018-08	neuroscience	145523	2595139		178875	288050	221911	2656670	457003	591842	546769	21157	320868	471271	206172	1239233	1373108	2492042	209475	729054	391254	2595139	16810	34718	57980	58453	321662	261227	216626	470350	48300
2018-08	paleontology	867	17677		178875	288050	221911	2656670	457003	591842	546769	21157	320868	471271	206172	1239233	1373108	2492042	209475	729054	391254	2595139	17677	34718	57980	58453	321662	261227	216626	470350	48300
2018-08	pathology	4058	38776		178875	288050	221911	2656670	457003	591842	546769	21157	320868	471271	206172	1239233	1373108	2492042	209475	729054	391254	2595139	17677	38776	57980	58453	321662	261227	216626	470350	48300
2018-08	pharmacology and toxicology	2985	60965		178875	288050	221911	2656670	457003	591842	546769	21157	320868	471271	206172	1239233	1373108	2492042	209475	729054	391254	2595139	17677	38776	60965	58453	321662	261227	216626	470350	48300
2018-08	physiology	6728	65181		178875	288050	221911	2656670	457003	591842	546769	21157	320868	471271	206172	1239233	1373108	2492042	209475	729054	391254	2595139	17677	38776	60965	65181	321662	261227	216626	470350	48300
2018-08	plant biology	17372	339034		178875	288050	221911	2656670	457003	591842	546769	21157	320868	471271	206172	1239233	1373108	2492042	209475	729054	391254	2595139	17677	38776	60965	65181	339034	261227	216626	470350	48300
2018-08	scientific communication and education	7292	268519		178875	288050	221911	2656670	457003	591842	546769	21157	320868	471271	206172	1239233	1373108	2492042	209475	729054	391254	2595139	17677	38776	60965	65181	339034	268519	216626	470350	48300
2018-08	synthetic biology	9497	226123		178875	288050	221911	2656670	457003	591842	546769	21157	320868	471271	206172	1239233	1373108	2492042	209475	729054	391254	2595139	17677	38776	60965	65181	339034	268519	226123	470350	48300
2018-08	systems biology	22407	492757		178875	288050	221911	2656670	457003	591842	546769	21157	320868	471271	206172	1239233	1373108	2492042	209475	729054	391254	2595139	17677	38776	60965	65181	339034	268519	226123	492757	48300
2018-08	zoology	2065	50365		178875	288050	221911	2656670	457003	591842	546769	21157	320868	471271	206172	1239233	1373108	2492042	209475	729054	391254	2595139	17677	38776	60965	65181	339034	268519	226123	492757	50365
2018-09	animal behavior and cognition	13304	192179		192179	288050	221911	2656670	457003	591842	546769	21157	320868	471271	206172	1239233	1373108	2492042	209475	729054	391254	2595139	17677	38776	60965	65181	339034	268519	226123	492757	50365
2018-09	biochemistry	20292	308342		192179	308342	221911	2656670	457003	591842	546769	21157	320868	471271	206172	1239233	1373108	2492042	209475	729054	391254	2595139	17677	38776	60965	65181	339034	268519	226123	492757	50365
2018-09	bioengineering	14529	236440		192179	308342	236440	2656670	457003	591842	546769	21157	320868	471271	206172	1239233	1373108	2492042	209475	729054	391254	2595139	17677	38776	60965	65181	339034	268519	226123	492757	50365
2018-09	bioinformatics	118002	2774672		192179	308342	236440	2774672	457003	591842	546769	21157	320868	471271	206172	1239233	1373108	2492042	209475	729054	391254	2595139	17677	38776	60965	65181	339034	268519	226123	492757	50365
2018-09	biophysics	35459	492462		192179	308342	236440	2774672	492462	591842	546769	21157	320868	471271	206172	1239233	1373108	2492042	209475	729054	391254	2595139	17677	38776	60965	65181	339034	268519	226123	492757	50365
2018-09	cancer biology	30014	621856		192179	308342	236440	2774672	492462	621856	546769	21157	320868	471271	206172	1239233	1373108	2492042	209475	729054	391254	2595139	17677	38776	60965	65181	339034	268519	226123	492757	50365
2018-09	cell biology	41561	588330		192179	308342	236440	2774672	492462	621856	588330	21157	320868	471271	206172	1239233	1373108	2492042	209475	729054	391254	2595139	17677	38776	60965	65181	339034	268519	226123	492757	50365
2018-09	clinical trials	1239	22396		192179	308342	236440	2774672	492462	621856	588330	22396	320868	471271	206172	1239233	1373108	2492042	209475	729054	391254	2595139	17677	38776	60965	65181	339034	268519	226123	492757	50365
2018-09	developmental biology	24101	344969		192179	308342	236440	2774672	492462	621856	588330	22396	344969	471271	206172	1239233	1373108	2492042	209475	729054	391254	2595139	17677	38776	60965	65181	339034	268519	226123	492757	50365
2018-09	ecology	24738	496009		192179	308342	236440	2774672	492462	621856	588330	22396	344969	496009	206172	1239233	1373108	2492042	209475	729054	391254	2595139	17677	38776	60965	65181	339034	268519	226123	492757	50365
2018-09	epidemiology	14357	220529		192179	308342	236440	2774672	492462	621856	588330	22396	344969	496009	220529	1239233	1373108	2492042	209475	729054	391254	2595139	17677	38776	60965	65181	339034	268519	226123	492757	50365
2018-09	evolutionary biology	49688	1288921		192179	308342	236440	2774672	492462	621856	588330	22396	344969	496009	220529	1288921	1373108	2492042	209475	729054	391254	2595139	17677	38776	60965	65181	339034	268519	226123	492757	50365
2018-09	genetics	61637	1434745		192179	308342	236440	2774672	492462	621856	588330	22396	344969	496009	220529	1288921	1434745	2492042	209475	729054	391254	2595139	17677	38776	60965	65181	339034	268519	226123	492757	50365
2018-09	genomics	104990	2597032		192179	308342	236440	2774672	492462	621856	588330	22396	344969	496009	220529	1288921	1434745	2597032	209475	729054	391254	2595139	17677	38776	60965	65181	339034	268519	226123	492757	50365
2018-09	immunology	15745	225220		192179	308342	236440	2774672	492462	621856	588330	22396	344969	496009	220529	1288921	1434745	2597032	225220	729054	391254	2595139	17677	38776	60965	65181	339034	268519	226123	492757	50365
2018-09	microbiology	52610	781664		192179	308342	236440	2774672	492462	621856	588330	22396	344969	496009	220529	1288921	1434745	2597032	225220	781664	391254	2595139	17677	38776	60965	65181	339034	268519	226123	492757	50365
2018-09	molecular biology	26680	417934		192179	308342	236440	2774672	492462	621856	588330	22396	344969	496009	220529	1288921	1434745	2597032	225220	781664	417934	2595139	17677	38776	60965	65181	339034	268519	226123	492757	50365
2018-09	neuroscience	173344	2768483		192179	308342	236440	2774672	492462	621856	588330	22396	344969	496009	220529	1288921	1434745	2597032	225220	781664	417934	2768483	17677	38776	60965	65181	339034	268519	226123	492757	50365
2018-09	paleontology	2193	19870		192179	308342	236440	2774672	492462	621856	588330	22396	344969	496009	220529	1288921	1434745	2597032	225220	781664	417934	2768483	19870	38776	60965	65181	339034	268519	226123	492757	50365
2018-09	pathology	3432	42208		192179	308342	236440	2774672	492462	621856	588330	22396	344969	496009	220529	1288921	1434745	2597032	225220	781664	417934	2768483	19870	42208	60965	65181	339034	268519	226123	492757	50365
2018-09	pharmacology and toxicology	3969	64934		192179	308342	236440	2774672	492462	621856	588330	22396	344969	496009	220529	1288921	1434745	2597032	225220	781664	417934	2768483	19870	42208	64934	65181	339034	268519	226123	492757	50365
2018-09	physiology	5097	70278		192179	308342	236440	2774672	492462	621856	588330	22396	344969	496009	220529	1288921	1434745	2597032	225220	781664	417934	2768483	19870	42208	64934	70278	339034	268519	226123	492757	50365
2018-09	plant biology	18161	357195		192179	308342	236440	2774672	492462	621856	588330	22396	344969	496009	220529	1288921	1434745	2597032	225220	781664	417934	2768483	19870	42208	64934	70278	357195	268519	226123	492757	50365
2018-09	scientific communication and education	8929	277448		192179	308342	236440	2774672	492462	621856	588330	22396	344969	496009	220529	1288921	1434745	2597032	225220	781664	417934	2768483	19870	42208	64934	70278	357195	277448	226123	492757	50365
2018-09	synthetic biology	11498	237621		192179	308342	236440	2774672	492462	621856	588330	22396	344969	496009	220529	1288921	1434745	2597032	225220	781664	417934	2768483	19870	42208	64934	70278	357195	277448	237621	492757	50365
2018-09	systems biology	22923	515680		192179	308342	236440	2774672	492462	621856	588330	22396	344969	496009	220529	1288921	1434745	2597032	225220	781664	417934	2768483	19870	42208	64934	70278	357195	277448	237621	515680	50365
2018-09	zoology	2681	53046		192179	308342	236440	2774672	492462	621856	588330	22396	344969	496009	220529	1288921	1434745	2597032	225220	781664	417934	2768483	19870	42208	64934	70278	357195	277448	237621	515680	53046
2018-10	animal behavior and cognition	17163	209342		209342	308342	236440	2774672	492462	621856	588330	22396	344969	496009	220529	1288921	1434745	2597032	225220	781664	417934	2768483	19870	42208	64934	70278	357195	277448	237621	515680	53046
2018-10	biochemistry	29052	337394		209342	337394	236440	2774672	492462	621856	588330	22396	344969	496009	220529	1288921	1434745	2597032	225220	781664	417934	2768483	19870	42208	64934	70278	357195	277448	237621	515680	53046
2018-10	bioengineering	20817	257257		209342	337394	257257	2774672	492462	621856	588330	22396	344969	496009	220529	1288921	1434745	2597032	225220	781664	417934	2768483	19870	42208	64934	70278	357195	277448	237621	515680	53046
2018-10	bioinformatics	153560	2928232		209342	337394	257257	2928232	492462	621856	588330	22396	344969	496009	220529	1288921	1434745	2597032	225220	781664	417934	2768483	19870	42208	64934	70278	357195	277448	237621	515680	53046
2018-10	biophysics	43584	536046		209342	337394	257257	2928232	536046	621856	588330	22396	344969	496009	220529	1288921	1434745	2597032	225220	781664	417934	2768483	19870	42208	64934	70278	357195	277448	237621	515680	53046
2018-10	cancer biology	38147	660003		209342	337394	257257	2928232	536046	660003	588330	22396	344969	496009	220529	1288921	1434745	2597032	225220	781664	417934	2768483	19870	42208	64934	70278	357195	277448	237621	515680	53046
2018-10	cell biology	51230	639560		209342	337394	257257	2928232	536046	660003	639560	22396	344969	496009	220529	1288921	1434745	2597032	225220	781664	417934	2768483	19870	42208	64934	70278	357195	277448	237621	515680	53046
2018-10	clinical trials	2554	24950		209342	337394	257257	2928232	536046	660003	639560	24950	344969	496009	220529	1288921	1434745	2597032	225220	781664	417934	2768483	19870	42208	64934	70278	357195	277448	237621	515680	53046
2018-10	developmental biology	30894	375863		209342	337394	257257	2928232	536046	660003	639560	24950	375863	496009	220529	1288921	1434745	2597032	225220	781664	417934	2768483	19870	42208	64934	70278	357195	277448	237621	515680	53046
2018-10	ecology	34035	530044		209342	337394	257257	2928232	536046	660003	639560	24950	375863	530044	220529	1288921	1434745	2597032	225220	781664	417934	2768483	19870	42208	64934	70278	357195	277448	237621	515680	53046
2018-10	epidemiology	18203	238732		209342	337394	257257	2928232	536046	660003	639560	24950	375863	530044	238732	1288921	1434745	2597032	225220	781664	417934	2768483	19870	42208	64934	70278	357195	277448	237621	515680	53046
2018-10	evolutionary biology	61852	1350773		209342	337394	257257	2928232	536046	660003	639560	24950	375863	530044	238732	1350773	1434745	2597032	225220	781664	417934	2768483	19870	42208	64934	70278	357195	277448	237621	515680	53046
2018-10	genetics	73950	1508695		209342	337394	257257	2928232	536046	660003	639560	24950	375863	530044	238732	1350773	1508695	2597032	225220	781664	417934	2768483	19870	42208	64934	70278	357195	277448	237621	515680	53046
2018-10	genomics	126905	2723937		209342	337394	257257	2928232	536046	660003	639560	24950	375863	530044	238732	1350773	1508695	2723937	225220	781664	417934	2768483	19870	42208	64934	70278	357195	277448	237621	515680	53046
2018-10	immunology	20823	246043		209342	337394	257257	2928232	536046	660003	639560	24950	375863	530044	238732	1350773	1508695	2723937	246043	781664	417934	2768483	19870	42208	64934	70278	357195	277448	237621	515680	53046
2018-10	microbiology	70177	851841		209342	337394	257257	2928232	536046	660003	639560	24950	375863	530044	238732	1350773	1508695	2723937	246043	851841	417934	2768483	19870	42208	64934	70278	357195	277448	237621	515680	53046
2018-10	molecular biology	33444	451378		209342	337394	257257	2928232	536046	660003	639560	24950	375863	530044	238732	1350773	1508695	2723937	246043	851841	451378	2768483	19870	42208	64934	70278	357195	277448	237621	515680	53046
2018-10	neuroscience	213505	2981988		209342	337394	257257	2928232	536046	660003	639560	24950	375863	530044	238732	1350773	1508695	2723937	246043	851841	451378	2981988	19870	42208	64934	70278	357195	277448	237621	515680	53046
2018-10	paleontology	1384	21254		209342	337394	257257	2928232	536046	660003	639560	24950	375863	530044	238732	1350773	1508695	2723937	246043	851841	451378	2981988	21254	42208	64934	70278	357195	277448	237621	515680	53046
2018-10	pathology	3842	46050		209342	337394	257257	2928232	536046	660003	639560	24950	375863	530044	238732	1350773	1508695	2723937	246043	851841	451378	2981988	21254	46050	64934	70278	357195	277448	237621	515680	53046
2018-10	pharmacology and toxicology	5537	70471		209342	337394	257257	2928232	536046	660003	639560	24950	375863	530044	238732	1350773	1508695	2723937	246043	851841	451378	2981988	21254	46050	70471	70278	357195	277448	237621	515680	53046
2018-10	physiology	6251	76529		209342	337394	257257	2928232	536046	660003	639560	24950	375863	530044	238732	1350773	1508695	2723937	246043	851841	451378	2981988	21254	46050	70471	76529	357195	277448	237621	515680	53046
2018-10	plant biology	24440	381635		209342	337394	257257	2928232	536046	660003	639560	24950	375863	530044	238732	1350773	1508695	2723937	246043	851841	451378	2981988	21254	46050	70471	76529	381635	277448	237621	515680	53046
2018-10	scientific communication and education	10474	287922		209342	337394	257257	2928232	536046	660003	639560	24950	375863	530044	238732	1350773	1508695	2723937	246043	851841	451378	2981988	21254	46050	70471	76529	381635	287922	237621	515680	53046
2018-10	synthetic biology	14295	251916		209342	337394	257257	2928232	536046	660003	639560	24950	375863	530044	238732	1350773	1508695	2723937	246043	851841	451378	2981988	21254	46050	70471	76529	381635	287922	251916	515680	53046
2018-10	systems biology	30694	546374		209342	337394	257257	2928232	536046	660003	639560	24950	375863	530044	238732	1350773	1508695	2723937	246043	851841	451378	2981988	21254	46050	70471	76529	381635	287922	251916	546374	53046
2018-10	zoology	3484	56530		209342	337394	257257	2928232	536046	660003	639560	24950	375863	530044	238732	1350773	1508695	2723937	246043	851841	451378	2981988	21254	46050	70471	76529	381635	287922	251916	546374	56530
2018-11	animal behavior and cognition	15748	225090		225090	337394	257257	2928232	536046	660003	639560	24950	375863	530044	238732	1350773	1508695	2723937	246043	851841	451378	2981988	21254	46050	70471	76529	381635	287922	251916	546374	56530
2018-11	biochemistry	27528	364922		225090	364922	257257	2928232	536046	660003	639560	24950	375863	530044	238732	1350773	1508695	2723937	246043	851841	451378	2981988	21254	46050	70471	76529	381635	287922	251916	546374	56530
2018-11	bioengineering	22811	280068		225090	364922	280068	2928232	536046	660003	639560	24950	375863	530044	238732	1350773	1508695	2723937	246043	851841	451378	2981988	21254	46050	70471	76529	381635	287922	251916	546374	56530
2018-11	bioinformatics	152268	3080500		225090	364922	280068	3080500	536046	660003	639560	24950	375863	530044	238732	1350773	1508695	2723937	246043	851841	451378	2981988	21254	46050	70471	76529	381635	287922	251916	546374	56530
2018-11	biophysics	44077	580123		225090	364922	280068	3080500	580123	660003	639560	24950	375863	530044	238732	1350773	1508695	2723937	246043	851841	451378	2981988	21254	46050	70471	76529	381635	287922	251916	546374	56530
2018-11	cancer biology	35739	695742		225090	364922	280068	3080500	580123	695742	639560	24950	375863	530044	238732	1350773	1508695	2723937	246043	851841	451378	2981988	21254	46050	70471	76529	381635	287922	251916	546374	56530
2018-11	cell biology	49008	688568		225090	364922	280068	3080500	580123	695742	688568	24950	375863	530044	238732	1350773	1508695	2723937	246043	851841	451378	2981988	21254	46050	70471	76529	381635	287922	251916	546374	56530
2018-11	clinical trials	2939	27889		225090	364922	280068	3080500	580123	695742	688568	27889	375863	530044	238732	1350773	1508695	2723937	246043	851841	451378	2981988	21254	46050	70471	76529	381635	287922	251916	546374	56530
2018-11	developmental biology	31475	407338		225090	364922	280068	3080500	580123	695742	688568	27889	407338	530044	238732	1350773	1508695	2723937	246043	851841	451378	2981988	21254	46050	70471	76529	381635	287922	251916	546374	56530
2018-11	ecology	32598	562642		225090	364922	280068	3080500	580123	695742	688568	27889	407338	562642	238732	1350773	1508695	2723937	246043	851841	451378	2981988	21254	46050	70471	76529	381635	287922	251916	546374	56530
2018-11	epidemiology	21583	260315		225090	364922	280068	3080500	580123	695742	688568	27889	407338	562642	260315	1350773	1508695	2723937	246043	851841	451378	2981988	21254	46050	70471	76529	381635	287922	251916	546374	56530
2018-11	evolutionary biology	59159	1409932		225090	364922	280068	3080500	580123	695742	688568	27889	407338	562642	260315	1409932	1508695	2723937	246043	851841	451378	2981988	21254	46050	70471	76529	381635	287922	251916	546374	56530
2018-11	genetics	64944	1573639		225090	364922	280068	3080500	580123	695742	688568	27889	407338	562642	260315	1409932	1573639	2723937	246043	851841	451378	2981988	21254	46050	70471	76529	381635	287922	251916	546374	56530
2018-11	genomics	122399	2846336		225090	364922	280068	3080500	580123	695742	688568	27889	407338	562642	260315	1409932	1573639	2846336	246043	851841	451378	2981988	21254	46050	70471	76529	381635	287922	251916	546374	56530
2018-11	immunology	21836	267879		225090	364922	280068	3080500	580123	695742	688568	27889	407338	562642	260315	1409932	1573639	2846336	267879	851841	451378	2981988	21254	46050	70471	76529	381635	287922	251916	546374	56530
2018-11	microbiology	63241	915082		225090	364922	280068	3080500	580123	695742	688568	27889	407338	562642	260315	1409932	1573639	2846336	267879	915082	451378	2981988	21254	46050	70471	76529	381635	287922	251916	546374	56530
2018-11	molecular biology	31697	483075		225090	364922	280068	3080500	580123	695742	688568	27889	407338	562642	260315	1409932	1573639	2846336	267879	915082	483075	2981988	21254	46050	70471	76529	381635	287922	251916	546374	56530
2018-11	neuroscience	202468	3184456		225090	364922	280068	3080500	580123	695742	688568	27889	407338	562642	260315	1409932	1573639	2846336	267879	915082	483075	3184456	21254	46050	70471	76529	381635	287922	251916	546374	56530
2018-11	paleontology	1606	22860		225090	364922	280068	3080500	580123	695742	688568	27889	407338	562642	260315	1409932	1573639	2846336	267879	915082	483075	3184456	22860	46050	70471	76529	381635	287922	251916	546374	56530
2018-11	pathology	4161	50211		225090	364922	280068	3080500	580123	695742	688568	27889	407338	562642	260315	1409932	1573639	2846336	267879	915082	483075	3184456	22860	50211	70471	76529	381635	287922	251916	546374	56530
2018-11	pharmacology and toxicology	4919	75390		225090	364922	280068	3080500	580123	695742	688568	27889	407338	562642	260315	1409932	1573639	2846336	267879	915082	483075	3184456	22860	50211	75390	76529	381635	287922	251916	546374	56530
2018-11	physiology	7821	84350		225090	364922	280068	3080500	580123	695742	688568	27889	407338	562642	260315	1409932	1573639	2846336	267879	915082	483075	3184456	22860	50211	75390	84350	381635	287922	251916	546374	56530
2018-11	plant biology	26862	408497		225090	364922	280068	3080500	580123	695742	688568	27889	407338	562642	260315	1409932	1573639	2846336	267879	915082	483075	3184456	22860	50211	75390	84350	408497	287922	251916	546374	56530
2018-11	scientific communication and education	9871	297793		225090	364922	280068	3080500	580123	695742	688568	27889	407338	562642	260315	1409932	1573639	2846336	267879	915082	483075	3184456	22860	50211	75390	84350	408497	297793	251916	546374	56530
2018-11	synthetic biology	13188	265104		225090	364922	280068	3080500	580123	695742	688568	27889	407338	562642	260315	1409932	1573639	2846336	267879	915082	483075	3184456	22860	50211	75390	84350	408497	297793	265104	546374	56530
2018-11	systems biology	35185	581559		225090	364922	280068	3080500	580123	695742	688568	27889	407338	562642	260315	1409932	1573639	2846336	267879	915082	483075	3184456	22860	50211	75390	84350	408497	297793	265104	581559	56530
2018-11	zoology	3225	59755		225090	364922	280068	3080500	580123	695742	688568	27889	407338	562642	260315	1409932	1573639	2846336	267879	915082	483075	3184456	22860	50211	75390	84350	408497	297793	265104	581559	59755
