# Supplementary material for: Tracking the popularity and outcomes of all bioRxiv preprints
Source: eLife journal article supplement (doi:10.7554/elife.45133), 2019-04-24
Supplement: supp [file elife-45133-supp-v1.zip › elife_poa_e45133_Figure_2_source_data_4.csv]

month	year	downloads
11	2013	3716
12	2013	13552
1	2014	16389
2	2014	14852
3	2014	17266
4	2014	27572
5	2014	29892
6	2014	30600
7	2014	34873
8	2014	28499
9	2014	40235
10	2014	43721
11	2014	42314
12	2014	42107
1	2015	52520
2	2015	67666
3	2015	72693
4	2015	73639
5	2015	75463
6	2015	75750
7	2015	85605
8	2015	77606
9	2015	83257
10	2015	104927
11	2015	113901
12	2015	103681
1	2016	145778
2	2016	150283
3	2016	187512
4	2016	201980
5	2016	354466
6	2016	296060
7	2016	279063
8	2016	283333
9	2016	279476
10	2016	291887
11	2016	326026
12	2016	302017
1	2017	319507
2	2017	336619
3	2017	431610
4	2017	476714
5	2017	511047
6	2017	510521
7	2017	488033
8	2017	536861
9	2017	543579
10	2017	626608
11	2017	626449
12	2017	540775
1	2018	729414
2	2018	693998
3	2018	787712
4	2018	773099
5	2018	802576
6	2018	762501
7	2018	779905
8	2018	801585
9	2018	901173
10	2018	1140296
11	2018	1108356
