# Supplementary material for: Tracking the popularity and outcomes of all bioRxiv preprints
Source: eLife journal article supplement (doi:10.7554/elife.45133), 2019-04-24
Supplement: supp [file elife-45133-supp-v1.zip › elife_poa_e45133_Figure_3_figure_supplement_3_source_data_1.xlsx]

## Sheet: sensitivity
year_posted	article_id	url	published	notes		Incorrect:	0.375
2014	10717	https://doi.org/10.1101/003988	https://doi.org/10.1093/gbe/evw234	different title	0.5
2014	8823	https://doi.org/10.1101/003061	https://doi.org/10.1016/j.celrep.2015.07.024	different title
2014	5716	https://doi.org/10.1101/006650	FALSE	https://doi.org/10.1016/j.jbi.2010.03.002
2014	5665	https://doi.org/10.1101/010512	FALSE
2014	10694	https://doi.org/10.1101/009340	https://doi.org/10.1016/j.ajhg.2014.11.010	different title
2014	18237	https://doi.org/10.1101/013334	FALSE
2014	28903	https://doi.org/10.1101/010124	https://doi.org/10.1063/1.5039861
2014	5655	https://doi.org/10.1101/011205	FALSE
2014	26677	https://doi.org/10.1101/001735	FALSE	https://doi.org/10.1038/srep10004
2014	16667	https://doi.org/10.1101/013185	FALSE
2014	8728	https://doi.org/10.1101/012203	FALSE
2014	27733	https://doi.org/10.1101/004978	FALSE
2014	27529	https://doi.org/10.1101/003483	https://doi.org/10.1038/srep19620	different title
2014	5397	https://doi.org/10.1101/002782	https://doi.org/10.1007/s11306-015-0893-5
2014	19408	https://doi.org/10.1101/008813	FALSE
2014	8821	https://doi.org/10.1101/001719	https://doi.org/10.1038/srep24507	different title
2014	20453	https://doi.org/10.1101/004283	FALSE
2014	8822	https://doi.org/10.1101/003236	FALSE
2014	5743	https://doi.org/10.1101/004028	FALSE	https://arxiv.org/abs/1404.2374
2014	30097	https://doi.org/10.1101/005025	https://doi.org/10.1038/srep09386	different title
2014	20454	https://doi.org/10.1101/005538	FALSE
2014	16697	https://doi.org/10.1101/006510	FALSE	https://journals.plos.org/plosone/article/comment?id=10.1371/annotation/ad10af7f-9a77-4246-9804-86e2634050ac
2014	5765	https://doi.org/10.1101/002097	https://doi.org/10.1371/journal.pone.0123658	different title
2014	31152	https://doi.org/10.1101/007435	https://doi.org/10.1093/comnet/cnv027
2014	8811	https://doi.org/10.1101/004366	https://doi.org/10.1038/srep11415	different title
2014	31136	https://doi.org/10.1101/011189	https://doi.org/10.1016/j.physa.2015.01.038
2014	19446	https://doi.org/10.1101/003756	https://doi.org/10.1016/bs.adgen.2016.01.001	different title
2014	24114	https://doi.org/10.1101/010652	https://doi.org/10.1098/rsob.170134	4 years later, different title and senior author
2014	8745	https://doi.org/10.1101/010033	https://doi.org/10.1101/gr.185371.114	different title
2014	31157	https://doi.org/10.1101/003186	FALSE
2015	19337	https://doi.org/10.1101/034389	https://doi.org/10.1086/690008	different title	0.533333
2015	10513	https://doi.org/10.1101/034629	FALSE
2015	5471	https://doi.org/10.1101/025064	FALSE
2015	26383	https://doi.org/10.1101/023234	https://doi.org/10.1093/gbe/evw232	different title
2015	8498	https://doi.org/10.1101/035436	FALSE
2015	16543	https://doi.org/10.1101/034835	FALSE
2015	26274	https://doi.org/10.1101/031575	https://doi.org/10.1111/mec.13922	different title
2015	26187	https://doi.org/10.1101/031781	https://doi.org/10.1371/journal.pgen.1005920
2015	20448	https://doi.org/10.1101/027532	https://doi.org/10.1676/wils-128-02-328-333.1	slightly different title
2015	5418	https://doi.org/10.1101/029553	https://doi.org/10.1016/j.cels.2016.06.012	different title
2015	16588	https://doi.org/10.1101/026674	FALSE
2015	5404	https://doi.org/10.1101/019265	FALSE
2015	10422	https://doi.org/10.1101/034173	https://doi.org/10.1093/hmg/ddw336
2015	5605	https://doi.org/10.1101/015503	FALSE
2015	11528	https://doi.org/10.1101/023796	FALSE
2015	10610	https://doi.org/10.1101/020933	FALSE
2015	4954	https://doi.org/10.1101/014399	https://doi.org/10.1109/ISIT.2015.7282589	Posted AFTER publication, to arxiv too: https://arxiv.org/abs/1501.06194
2015	30767	https://doi.org/10.1101/029355	https://doi.org/10.1016/j.bpj.2017.11.015	different title
2015	8622	https://doi.org/10.1101/022764	FALSE
2015	19340	https://doi.org/10.1101/033647	https://doi.org/10.1086/689819	slightly different title *** ARTICLE WITH NO AUTHORS
2015	30032	https://doi.org/10.1101/028266	https://doi.org/10.1109/ACC.2016.7524950
2015	30046	https://doi.org/10.1101/021410	https://doi.org/10.1109/LLS.2015.2483820	different title
2015	16604	https://doi.org/10.1101/023556	https://doi.org/10.2337/db16-0861	very different text, different title
2015	5390	https://doi.org/10.1101/031997	https://doi.org/10.1093/bioinformatics/btw806	different title
2015	5365	https://doi.org/10.1101/028720	https://doi.org/10.1016/j.genrep.2016.01.001
2015	28506	https://doi.org/10.1101/030080	FALSE
2015	29047	https://doi.org/10.1101/017814	FALSE	possibly revised here: https://www.biorxiv.org/content/10.1101/172007v1
2015	5380	https://doi.org/10.1101/032854	https://doi.org/10.1093/biostatistics/kxx040	very different text, different title
2015	5528	https://doi.org/10.1101/020784	FALSE	probably revision of https://www.biorxiv.org/content/10.1101/018739v1
2015	5348	https://doi.org/10.1101/035204	FALSE
2016	5072	https://doi.org/10.1101/060806	FALSE		0.3
2016	4348	https://doi.org/10.1101/070490	FALSE
2016	8051	https://doi.org/10.1101/073510	FALSE
2016	26033	https://doi.org/10.1101/059154	https://doi.org/10.1098/rsos.172190
2016	6585	https://doi.org/10.1101/064550	FALSE
2016	16233	https://doi.org/10.1101/074484	https://doi.org/10.1111/ejn.13865	different title
2016	16429	https://doi.org/10.1101/051193	FALSE
2016	4544	https://doi.org/10.1101/088740	FALSE
2016	21788	https://doi.org/10.1101/057265	FALSE
2016	10234	https://doi.org/10.1101/083923	FALSE
2016	16041	https://doi.org/10.1101/090209	FALSE
2016	5227	https://doi.org/10.1101/046532	FALSE
2016	31012	https://doi.org/10.1101/077800	FALSE
2016	25787	https://doi.org/10.1101/094896	FALSE
2016	8305	https://doi.org/10.1101/049239	https://doi.org/10.1038/mtm.2016.76	different title
2016	20916	https://doi.org/10.1101/045559	https://doi.org/10.3389/fnbot.2017.00020	different title
2016	29024	https://doi.org/10.1101/041871	https://doi.org/10.1038/ncomms15459	different title
2016	26079	https://doi.org/10.1101/053371	https://doi.org/10.1038/s41559-017-0284-6	different title
2016	5214	https://doi.org/10.1101/047225	https://doi.org/10.1109/THS.2016.7568876
2016	6590	https://doi.org/10.1101/066357	FALSE
2016	16481	https://doi.org/10.1101/043901	FALSE
2016	8496	https://doi.org/10.1101/035816	FALSE
2016	4701	https://doi.org/10.1101/097139	FALSE
2016	38800	https://doi.org/10.1101/051326	FALSE
2016	8043	https://doi.org/10.1101/065771	FALSE
2016	4910	https://doi.org/10.1101/075457	https://doi.org/10.1371/journal.pcbi.1005425	different title
2016	16532	https://doi.org/10.1101/036475	FALSE
2016	25836	https://doi.org/10.1101/089151	FALSE
2016	19198	https://doi.org/10.1101/074492	https://doi.org/10.1111/nrm.12120	different title
2016	5338	https://doi.org/10.1101/036087	FALSE
2017	10114	https://doi.org/10.1101/102285	FALSE		0.166667
2017	14579	https://doi.org/10.1101/205310	FALSE
2017	14408	https://doi.org/10.1101/216697	FALSE
2017	9500	https://doi.org/10.1101/222307	FALSE
2017	25458	https://doi.org/10.1101/154047	FALSE
2017	3659	https://doi.org/10.1101/203729	FALSE
2017	17316	https://doi.org/10.1101/123067	FALSE
2017	15336	https://doi.org/10.1101/152652	https://doi.org/10.1016/j.jpain.2017.12.225
2017	9812	https://doi.org/10.1101/168658	FALSE
2017	28875	https://doi.org/10.1101/223271	FALSE
2017	23611	https://doi.org/10.1101/238741	FALSE
2017	18819	https://doi.org/10.1101/103721	FALSE
2017	20778	https://doi.org/10.1101/179408	FALSE
2017	3575	https://doi.org/10.1101/229385	FALSE
2017	6263	https://doi.org/10.1101/141671	FALSE
2017	22588	https://doi.org/10.1101/204743	https://doi.org/10.1038/nbt.4138	different title
2017	14779	https://doi.org/10.1101/191148	FALSE
2017	17101	https://doi.org/10.1101/225516	FALSE
2017	6327	https://doi.org/10.1101/128405	FALSE
2017	14460	https://doi.org/10.1101/213827	FALSE
2017	2300	https://doi.org/10.1101/213603	FALSE
2017	20639	https://doi.org/10.1101/134080	FALSE
2017	3626	https://doi.org/10.1101/221911	FALSE
2017	27319	https://doi.org/10.1101/150656	https://doi.org/10.1038/nmeth.4483	different title
2017	7605	https://doi.org/10.1101/169367	https://doi.org/10.1002/ajb2.1239	different title
2017	3539	https://doi.org/10.1101/234062	FALSE
2017	30666	https://doi.org/10.1101/194571	FALSE
2017	18877	https://doi.org/10.1101/108175	https://doi.org/10.1016/j.ecolmodel.2017.11.016
2017	14681	https://doi.org/10.1101/198499	FALSE
2017	29814	https://doi.org/10.1101/112052	FALSE

## Sheet: specificity
year_posted	article_id	biorxiv_doi	published_doi	accurate
2014	26418	https://doi.org/10.1101/012229	https://doi.org/10.1016/j.jtbi.2015.06.039	TRUE
2014	5725	https://doi.org/10.1101/006338	https://doi.org/10.1186/s13059-014-0553-5	TRUE
2014	30106	https://doi.org/10.1101/002907	https://doi.org/10.1371/journal.pbio.1002042	TRUE
2014	8785	https://doi.org/10.1101/006841	https://doi.org/10.1101/gr.180893.114	TRUE
2014	10696	https://doi.org/10.1101/002816	https://doi.org/10.1016/j.ajhg.2014.09.002	TRUE
2014	26605	https://doi.org/10.1101/006023	https://doi.org/10.1093/gbe/evu166	TRUE	*posted after publication
2014	21876	https://doi.org/10.1101/011262	https://doi.org/10.1038/srep12035	TRUE
2014	5757	https://doi.org/10.1101/002881	https://doi.org/10.1002/cpe.3236	TRUE	DIFFERENT TITLE
2014	23229	https://doi.org/10.1101/001800	https://doi.org/10.1371/journal.pone.0091819	TRUE	*posted after publication
2014	8664	https://doi.org/10.1101/012211	https://doi.org/10.1186/s12864-015-1540-2	TRUE
2015	19346	https://doi.org/10.1101/031476	https://doi.org/10.1890/15-2026.1	TRUE	DIFFERENT TITLE
2015	8567	https://doi.org/10.1101/028555	https://doi.org/10.1093/nar/gkw568	TRUE	DIFFERENT TITLE
2015	16624	https://doi.org/10.1101/019547	https://doi.org/10.1523/JNEUROSCI.2221-17.2018	TRUE
2015	19389	https://doi.org/10.1101/018671	https://doi.org/10.1371/journal.pone.0129697	TRUE
2015	26410	https://doi.org/10.1101/021998	https://doi.org/10.7554/eLife.10559	TRUE
2015	8565	https://doi.org/10.1101/028936	https://doi.org/10.1371/journal.pcbi.1004889	TRUE
2015	8527	https://doi.org/10.1101/032763	https://doi.org/10.1073/pnas.1523951113	TRUE
2015	5182	https://doi.org/10.1101/030866	https://doi.org/10.1093/nar/gkw319	TRUE
2015	5407	https://doi.org/10.1101/027904	https://doi.org/10.1093/bioinformatics/btv646	TRUE
2015	8581	https://doi.org/10.1101/027383	https://doi.org/10.1038/nmicrobiol.2015.3	TRUE
2016	4715	https://doi.org/10.1101/090506	https://doi.org/10.1093/bioinformatics/btx334	TRUE	DIFFERENT TITLE
2016	29863	https://doi.org/10.1101/089334	https://doi.org/10.1371/journal.pbio.2001586	TRUE
2016	26124	https://doi.org/10.1101/048033	https://doi.org/10.1111/evo.12999	TRUE	DIFFERENT TITLE
2016	15507	https://doi.org/10.1101/056515	https://doi.org/10.1371/journal.pone.0189067	TRUE
2016	38788	https://doi.org/10.1101/065334	https://doi.org/10.1093/molbev/msw275	TRUE
2016	31023	https://doi.org/10.1101/072280	https://doi.org/10.2142/biophysico.13.0_281	TRUE
2016	26126	https://doi.org/10.1101/047803	https://doi.org/10.1038/srep34618	TRUE	DIFFERENT TITLE
2016	19168	https://doi.org/10.1101/083451	https://doi.org/10.1073/pnas.1714044115	TRUE	DIFFERENT TITLE
2016	19067	https://doi.org/10.1101/080697	https://doi.org/10.1111/2041-210x.12814	TRUE
2016	16321	https://doi.org/10.1101/041103	https://doi.org/10.7554/eLife.19695	TRUE	DIFFERENT TITLE
2017	23923	https://doi.org/10.1101/134304	https://doi.org/10.15252/embj.201797259	TRUE	DIFFERENT TITLE
2017	24529	https://doi.org/10.1101/161679	https://doi.org/10.1093/gbe/evy177	TRUE
2017	3578	https://doi.org/10.1101/219386	https://doi.org/10.1128/mSystems.00053-18	TRUE
2017	15665	https://doi.org/10.1101/125096	https://doi.org/10.3389/fnmol.2017.00445	TRUE	DIFFERENT TITLE
2017	29530	https://doi.org/10.1101/158147	https://doi.org/10.1186/s13321-017-0252-9	TRUE
2017	14772	https://doi.org/10.1101/189613	https://doi.org/10.1371/journal.pgen.1007213	TRUE
2017	3719	https://doi.org/10.1101/125112	https://doi.org/10.1038/s41467-017-02554-5	TRUE	substring of title
2017	28187	https://doi.org/10.1101/196121	https://doi.org/10.1371/journal.pone.0188406	TRUE
2017	7208	https://doi.org/10.1101/235002	https://doi.org/10.1038/s41586-018-0492-5	TRUE
2017	9711	https://doi.org/10.1101/185900	https://doi.org/10.1007/s00438-018-1418-5	TRUE

## Sheet: calculations
2014	Total:	886			False negative rates:			2014	Total:	886
					2014	0.5
	is published	is not published			2015	0.533333			is published	is not published
says published	607	0	Old rate:	0.685102	2016	0.3		says published	607	0	Old rate:	0.685102
says not published	139.5	139.5	New rate:	0.842551	2017	0.166667		says not published floor	89.5806	189.419	New floor:	0.786208
								says not published ceiling	189.419	89.5806	New ceiling:	0.898893
					Sample size:	30
2015	Total:	1774			MOE:	0.178923		2015	Total:	1774
	is published	is not published			Through 2017				is published	is not published
says published	1218	0	Old rate:	0.686584	Old rate:	0.652885		says published	1218	0	Old rate:	0.686584
says not published	296.533	259.467	New rate:	0.853739	New rate:	0.737821		says not published floor	197.052	358.948	New floor:	0.797662
					New floor:	0.678389		says not published ceiling	396.014	159.986	New ceiling:	0.909816
					New ceiling:	0.799927
2016	Total:	4718			delta	0.121538		2016	Total:	4718
	is published	is not published			Through 2016				is published	is not published
says published	3142	0	Old rate:	0.66596	Old rate:	0.673218		says published	3142	0	Old rate:	0.66596
says not published	472.8	1103.2	New rate:	0.766172	New rate:	0.796399		says not published floor	190.818	1385.18	New floor:	0.706405
					New floor:	0.73793		says not published ceiling	754.782	821.218	New ceiling:	0.825939
					New ceiling:	0.854868
2017	Total:	11342						2017	Total:	11342
	is published	is not published							is published	is not published
says published	7255	0	Old rate:	0.639658				says published	7255	0	Old rate:	0.639658
says not published	681.167	3405.83	New rate:	0.699715				says not published floor	0	4087	New floor:	0.639658
								says not published ceiling	1412.42	2674.58	New ceiling:	0.764188
