# Supplementary material for: Tracking the popularity and outcomes of all bioRxiv preprints
Source: eLife journal article supplement (doi:10.7554/elife.45133), 2019-04-24
Supplement: supp [file elife-45133-supp-v1.zip › elife_poa_e45133_Figure_3_source_data_1.csv]

month	posted	published	rate
2013-11	60	35	0.583333333
2013-12	49	36	0.734693878
2014-01	54	32	0.592592593
2014-02	66	45	0.681818182
2014-03	43	34	0.790697674
2014-04	66	40	0.606060606
2014-05	81	54	0.666666667
2014-06	72	46	0.638888889
2014-07	67	46	0.686567164
2014-08	80	55	0.6875
2014-09	93	64	0.688172043
2014-10	88	59	0.670454545
2014-11	81	62	0.765432099
2014-12	95	70	0.736842105
2015-01	114	85	0.745614035
2015-02	88	61	0.693181818
2015-03	120	81	0.675
2015-04	119	77	0.647058824
2015-05	112	67	0.598214286
2015-06	128	93	0.7265625
2015-07	159	105	0.660377358
2015-08	159	119	0.748427673
2015-09	162	113	0.697530864
2015-10	191	134	0.701570681
2015-11	227	152	0.669603524
2015-12	194	124	0.639175258
2016-01	202	134	0.663366337
2016-02	271	186	0.686346863
2016-03	366	229	0.62568306
2016-04	345	219	0.634782609
2016-05	388	257	0.662371134
2016-06	400	255	0.6375
2016-07	384	272	0.708333333
2016-08	448	305	0.680803571
2016-09	436	283	0.649082569
2016-10	455	311	0.683516484
2016-11	463	316	0.6825054
2016-12	557	360	0.646319569
2017-01	586	403	0.687713311
2017-02	623	431	0.691813804
2017-03	812	560	0.689655172
2017-04	741	497	0.67071525
2017-05	958	631	0.658663883
2017-06	1097	702	0.639927074
2017-07	976	608	0.62295082
2017-08	988	597	0.604251012
2017-09	1059	640	0.60434372
2017-10	1205	691	0.573443983
2017-11	1196	659	0.551003344
2017-12	1099	605	0.550500455
2018-01	1247	566	0.453889334
2018-02	1228	496	0.403908795
2018-03	1482	528	0.356275304
2018-04	1495	495	0.331103679
2018-05	1932	616	0.31884058
2018-06	1867	414	0.221746117
2018-07	1727	281	0.162709902
2018-08	1862	173	0.092910849
2018-09	1915	116	0.060574413
2018-10	2119	55	0.025955639
2018-11	1951	17	0.00871348
