# Supplementary material for: Tracking the popularity and outcomes of all bioRxiv preprints
Source: eLife journal article supplement (doi:10.7554/elife.45133), 2019-04-24
Supplement: supp [file elife-45133-supp-v1.zip › elife_poa_e45133_Figure_3_source_data_2.csv]

collection	published	total	proportion
animal behavior and cognition	233	609	0.38259441707717569787
biochemistry	453	1010	0.44851485148514851485
bioengineering	216	627	0.34449760765550239234
bioinformatics	1805	4249	0.42480583666745116498
biophysics	732	1566	0.46743295019157088123
cancer biology	406	1162	0.34939759036144578313
cell biology	679	1703	0.39870816206694069289
clinical trials	16	64	0.25000000000000000000
developmental biology	440	1121	0.39250669045495093666
ecology	538	1569	0.34289356277884002549
epidemiology	311	949	0.32771338250790305585
evolutionary biology	1512	2934	0.51533742331288343558
genetics	1127	2338	0.48203592814371257485
genomics	1454	2943	0.49405368671423717295
immunology	257	753	0.34130146082337317397
microbiology	1184	2769	0.42759118815456843626
molecular biology	391	1056	0.37026515151515151515
neuroscience	2608	6472	0.40296662546353522868
paleontology	15	52	0.28846153846153846154
pathology	34	152	0.22368421052631578947
pharmacology and toxicology	84	257	0.32684824902723735409
physiology	104	358	0.29050279329608938547
plant biology	401	957	0.41901776384535005225
scientific communication and education	66	235	0.28085106382978723404
synthetic biology	173	387	0.44702842377260981912
systems biology	501	1183	0.42349957734573119189
zoology	57	173	0.32947976878612716763
