# Supplementary material for: Tracking the popularity and outcomes of all bioRxiv preprints
Source: eLife journal article supplement (doi:10.7554/elife.45133), 2019-04-24
Supplement: supp [file elife-45133-supp-v1.zip › elife_poa_e45133_Figure_4_source_data_1.csv]

publication	tally	collection
bioinformatics	387	bioinformatics
bioinformatics	28	genomics
bioinformatics	22	systems biology
bioinformatics	11	genetics
bioinformatics	9	evolutionary biology
bioinformatics	6	cancer biology
bioinformatics	3	biophysics
bioinformatics	2	microbiology
bioinformatics	1	ecology
bioinformatics	1	synthetic biology
bioinformatics	1	immunology
bioinformatics	1	pharmacology and toxicology
biophysical journal	77	biophysics
biophysical journal	10	systems biology
biophysical journal	6	cell biology
biophysical journal	5	bioinformatics
biophysical journal	2	developmental biology
biophysical journal	2	cancer biology
biophysical journal	2	bioengineering
biophysical journal	2	biochemistry
biophysical journal	1	microbiology
biophysical journal	1	evolutionary biology
biophysical journal	1	neuroscience
bmc bioinformatics	111	bioinformatics
bmc bioinformatics	15	genomics
bmc bioinformatics	4	systems biology
bmc bioinformatics	3	evolutionary biology
bmc bioinformatics	2	biophysics
bmc bioinformatics	1	neuroscience
bmc bioinformatics	1	microbiology
bmc genomics	84	genomics
bmc genomics	46	bioinformatics
bmc genomics	12	evolutionary biology
bmc genomics	10	microbiology
bmc genomics	7	genetics
bmc genomics	5	molecular biology
bmc genomics	4	systems biology
bmc genomics	2	cancer biology
bmc genomics	2	neuroscience
bmc genomics	1	plant biology
bmc genomics	1	cell biology
cell reports	32	neuroscience
cell reports	16	genomics
cell reports	13	molecular biology
cell reports	12	cell biology
cell reports	11	systems biology
cell reports	8	developmental biology
cell reports	8	microbiology
cell reports	7	genetics
cell reports	6	cancer biology
cell reports	6	biochemistry
cell reports	5	bioinformatics
cell reports	5	immunology
cell reports	2	biophysics
cell reports	1	synthetic biology
cell reports	1	epidemiology
cell reports	1	evolutionary biology
cell reports	1	bioengineering
cell reports	1	plant biology
development	72	developmental biology
development	6	plant biology
development	2	molecular biology
development	2	systems biology
development	2	neuroscience
development	2	cell biology
development	1	genetics
development	1	biophysics
development	1	genomics
development	1	cancer biology
elife	223	neuroscience
elife	79	cell biology
elife	67	developmental biology
elife	63	biophysics
elife	62	biochemistry
elife	39	genomics
elife	35	evolutionary biology
elife	29	microbiology
elife	28	molecular biology
elife	28	genetics
elife	20	bioinformatics
elife	16	cancer biology
elife	13	systems biology
elife	12	plant biology
elife	8	immunology
elife	6	synthetic biology
elife	6	epidemiology
elife	5	ecology
elife	3	animal behavior and cognition
elife	3	bioengineering
elife	1	pharmacology and toxicology
elife	1	zoology
elife	1	scientific communication and education
elife	1	physiology
elife	1	paleontology
g3: genes|genomes|genetics	105	genetics
g3: genes|genomes|genetics	56	genomics
g3: genes|genomes|genetics	32	evolutionary biology
g3: genes|genomes|genetics	16	bioinformatics
g3: genes|genomes|genetics	10	plant biology
g3: genes|genomes|genetics	7	microbiology
g3: genes|genomes|genetics	6	neuroscience
g3: genes|genomes|genetics	5	developmental biology
g3: genes|genomes|genetics	3	molecular biology
g3: genes|genomes|genetics	3	cell biology
g3: genes|genomes|genetics	2	cancer biology
g3: genes|genomes|genetics	1	systems biology
genetics	110	evolutionary biology
genetics	94	genetics
genetics	29	genomics
genetics	8	bioinformatics
genetics	8	developmental biology
genetics	7	neuroscience
genetics	3	molecular biology
genetics	3	cell biology
genetics	2	plant biology
genetics	1	systems biology
genetics	1	cancer biology
genetics	1	epidemiology
genetics	1	bioengineering
genetics	1	biophysics
genome biology	76	bioinformatics
genome biology	62	genomics
genome biology	11	evolutionary biology
genome biology	6	molecular biology
genome biology	5	cancer biology
genome biology	4	microbiology
genome biology	3	plant biology
genome biology	3	systems biology
genome biology	3	genetics
genome biology	2	synthetic biology
genome biology	2	bioengineering
genome biology	1	cell biology
genome biology	1	developmental biology
genome biology	1	animal behavior and cognition
genome biology	1	neuroscience
genome biology and evolution	62	evolutionary biology
genome biology and evolution	30	genomics
genome biology and evolution	6	microbiology
genome biology and evolution	6	genetics
genome biology and evolution	2	bioinformatics
genome biology and evolution	1	epidemiology
genome biology and evolution	1	plant biology
genome biology and evolution	1	systems biology
genome research	98	genomics
genome research	32	bioinformatics
genome research	12	genetics
genome research	10	evolutionary biology
genome research	5	molecular biology
genome research	4	cancer biology
genome research	3	systems biology
genome research	3	developmental biology
genome research	3	microbiology
genome research	2	immunology
genome research	1	cell biology
genome research	1	synthetic biology
gigascience	48	bioinformatics
gigascience	20	genomics
gigascience	6	neuroscience
gigascience	6	plant biology
gigascience	3	microbiology
gigascience	2	systems biology
gigascience	1	evolutionary biology
gigascience	1	developmental biology
gigascience	1	ecology
gigascience	1	biophysics
gigascience	1	epidemiology
journal of neuroscience	169	neuroscience
journal of neuroscience	3	animal behavior and cognition
mbio	81	microbiology
mbio	8	evolutionary biology
mbio	5	genomics
mbio	2	genetics
mbio	2	synthetic biology
mbio	2	cell biology
mbio	2	systems biology
mbio	1	scientific communication and education
mbio	1	biophysics
mbio	1	immunology
mbio	1	bioengineering
mbio	1	biochemistry
mbio	1	ecology
molecular biology and evolution	107	evolutionary biology
molecular biology and evolution	14	genomics
molecular biology and evolution	13	genetics
molecular biology and evolution	9	bioinformatics
molecular biology and evolution	3	molecular biology
molecular biology and evolution	3	plant biology
molecular biology and evolution	2	microbiology
molecular biology and evolution	2	epidemiology
molecular biology and evolution	1	developmental biology
molecular biology and evolution	1	biophysics
molecular biology and evolution	1	cancer biology
molecular biology and evolution	1	systems biology
molecular biology of the cell	65	cell biology
molecular biology of the cell	8	biophysics
molecular biology of the cell	3	neuroscience
molecular biology of the cell	3	systems biology
molecular biology of the cell	3	biochemistry
molecular biology of the cell	2	microbiology
molecular biology of the cell	1	molecular biology
molecular biology of the cell	1	cancer biology
molecular biology of the cell	1	genomics
molecular biology of the cell	1	scientific communication and education
molecular ecology	60	evolutionary biology
molecular ecology	12	genomics
molecular ecology	9	ecology
molecular ecology	4	genetics
molecular ecology	3	microbiology
molecular ecology	2	plant biology
molecular ecology	1	molecular biology
molecular ecology	1	animal behavior and cognition
nature communications	91	neuroscience
nature communications	69	genomics
nature communications	51	cell biology
nature communications	42	genetics
nature communications	39	bioinformatics
nature communications	33	biophysics
nature communications	31	microbiology
nature communications	25	evolutionary biology
nature communications	24	biochemistry
nature communications	22	cancer biology
nature communications	19	developmental biology
nature communications	15	synthetic biology
nature communications	14	molecular biology
nature communications	12	immunology
nature communications	11	systems biology
nature communications	11	ecology
nature communications	8	bioengineering
nature communications	5	animal behavior and cognition
nature communications	3	plant biology
nature communications	2	epidemiology
nature communications	1	scientific communication and education
nature communications	1	pharmacology and toxicology
nature genetics	56	genetics
nature genetics	42	genomics
nature genetics	10	cancer biology
nature genetics	6	bioinformatics
nature genetics	4	evolutionary biology
nature genetics	3	plant biology
nature genetics	2	molecular biology
nature genetics	1	cell biology
nature genetics	1	biochemistry
nature methods	41	bioinformatics
nature methods	35	genomics
nature methods	7	biophysics
nature methods	6	neuroscience
nature methods	5	molecular biology
nature methods	4	systems biology
nature methods	4	genetics
nature methods	4	cell biology
nature methods	4	synthetic biology
nature methods	4	biochemistry
nature methods	2	cancer biology
nature methods	1	animal behavior and cognition
nature methods	1	bioengineering
nature methods	1	evolutionary biology
neuroimage	211	neuroscience
neuroimage	2	bioinformatics
neuroimage	1	bioengineering
nucleic acids research	93	bioinformatics
nucleic acids research	53	genomics
nucleic acids research	25	molecular biology
nucleic acids research	18	microbiology
nucleic acids research	17	biophysics
nucleic acids research	8	genetics
nucleic acids research	8	biochemistry
nucleic acids research	8	synthetic biology
nucleic acids research	7	systems biology
nucleic acids research	6	cancer biology
nucleic acids research	5	cell biology
nucleic acids research	5	evolutionary biology
nucleic acids research	4	plant biology
nucleic acids research	4	bioengineering
nucleic acids research	3	immunology
nucleic acids research	1	neuroscience
peerj	21	bioinformatics
peerj	16	ecology
peerj	15	evolutionary biology
peerj	15	genomics
peerj	10	microbiology
peerj	6	neuroscience
peerj	6	genetics
peerj	5	biophysics
peerj	4	cancer biology
peerj	4	biochemistry
peerj	4	plant biology
peerj	3	animal behavior and cognition
peerj	3	systems biology
peerj	2	zoology
peerj	2	epidemiology
peerj	1	scientific communication and education
peerj	1	molecular biology
peerj	1	pharmacology and toxicology
peerj	1	clinical trials
plos biology	22	neuroscience
plos biology	18	evolutionary biology
plos biology	15	microbiology
plos biology	9	developmental biology
plos biology	8	systems biology
plos biology	7	genomics
plos biology	7	cell biology
plos biology	4	scientific communication and education
plos biology	3	bioinformatics
plos biology	2	ecology
plos biology	2	biophysics
plos biology	2	epidemiology
plos biology	2	genetics
plos biology	2	animal behavior and cognition
plos biology	1	biochemistry
plos biology	1	pathology
plos biology	1	bioengineering
plos biology	1	plant biology
plos biology	1	zoology
plos computational biology	96	neuroscience
plos computational biology	76	bioinformatics
plos computational biology	48	systems biology
plos computational biology	27	biophysics
plos computational biology	19	evolutionary biology
plos computational biology	11	genomics
plos computational biology	10	epidemiology
plos computational biology	9	animal behavior and cognition
plos computational biology	8	microbiology
plos computational biology	6	cancer biology
plos computational biology	4	developmental biology
plos computational biology	3	ecology
plos computational biology	3	genetics
plos computational biology	3	cell biology
plos computational biology	3	biochemistry
plos computational biology	2	immunology
plos computational biology	2	physiology
plos computational biology	2	scientific communication and education
plos computational biology	1	plant biology
plos computational biology	1	synthetic biology
plos computational biology	1	molecular biology
plos computational biology	1	pharmacology and toxicology
plos computational biology	1	bioengineering
plos genetics	89	genetics
plos genetics	59	evolutionary biology
plos genetics	50	genomics
plos genetics	17	developmental biology
plos genetics	13	neuroscience
plos genetics	13	cell biology
plos genetics	10	molecular biology
plos genetics	9	plant biology
plos genetics	9	microbiology
plos genetics	7	bioinformatics
plos genetics	7	systems biology
plos genetics	5	cancer biology
plos genetics	1	immunology
plos genetics	1	bioengineering
plos genetics	1	pharmacology and toxicology
plos genetics	1	ecology
plos one	97	neuroscience
plos one	92	bioinformatics
plos one	56	genomics
plos one	56	microbiology
plos one	51	ecology
plos one	50	genetics
plos one	42	evolutionary biology
plos one	33	epidemiology
plos one	31	systems biology
plos one	23	biophysics
plos one	23	molecular biology
plos one	22	plant biology
plos one	21	animal behavior and cognition
plos one	21	bioengineering
plos one	19	biochemistry
plos one	16	cell biology
plos one	16	cancer biology
plos one	16	immunology
plos one	15	physiology
plos one	10	scientific communication and education
plos one	7	zoology
plos one	7	synthetic biology
plos one	6	pathology
plos one	5	pharmacology and toxicology
plos one	5	developmental biology
plos one	1	paleontology
pnas	64	neuroscience
pnas	57	evolutionary biology
pnas	51	biophysics
pnas	41	genetics
pnas	28	biochemistry
pnas	23	microbiology
pnas	21	genomics
pnas	19	cell biology
pnas	18	plant biology
pnas	15	immunology
pnas	14	bioinformatics
pnas	13	systems biology
pnas	11	cancer biology
pnas	11	ecology
pnas	8	bioengineering
pnas	8	developmental biology
pnas	7	synthetic biology
pnas	6	molecular biology
pnas	6	animal behavior and cognition
pnas	5	epidemiology
pnas	4	physiology
pnas	2	scientific communication and education
scientific reports	177	neuroscience
scientific reports	93	bioinformatics
scientific reports	72	genomics
scientific reports	61	microbiology
scientific reports	58	evolutionary biology
scientific reports	49	biophysics
scientific reports	39	genetics
scientific reports	34	systems biology
scientific reports	29	cancer biology
scientific reports	28	cell biology
scientific reports	25	biochemistry
scientific reports	24	animal behavior and cognition
scientific reports	22	molecular biology
scientific reports	20	developmental biology
scientific reports	17	immunology
scientific reports	16	ecology
scientific reports	12	epidemiology
scientific reports	11	bioengineering
scientific reports	11	plant biology
scientific reports	9	synthetic biology
scientific reports	8	physiology
scientific reports	6	zoology
scientific reports	4	pharmacology and toxicology
scientific reports	3	pathology
