# Supplementary material for: Tracking the popularity and outcomes of all bioRxiv preprints
Source: eLife journal article supplement (doi:10.7554/elife.45133), 2019-04-24
Supplement: supp [file elife-45133-supp-v1.zip › elife_poa_e45133_Figure_4_source_data_3.xlsx]

## Sheet: Sheet1
	2014			2015			2016			2017			2018			2014–2018
Journal	Total	Preprints	Proportion	Total	Preprints	Proportion	Total	Preprints	Proportion	Total	Preprints	Proportion	Total	Preprints	Proportion	Total	Preprints	Proportion
GigaScience	24	2	0.0833333	47	4	0.0851064	41	12	0.292683	133	28	0.210526	89	44	0.494382	375	90	0.24
Genome Research	187	6	0.0320856	170	20	0.117647	155	31	0.2	184	55	0.298913	169	62	0.366864	1020	174	0.170588
Genome Biology	207	11	0.0531401	219	23	0.105023	175	27	0.154286	186	47	0.252688	183	73	0.398907	1145	181	0.158079
Genetics	321	7	0.0218069	288	39	0.135417	327	69	0.211009	360	83	0.230556	276	71	0.257246	1899	269	0.141654
Nature Methods	151	3	0.0198675	165	11	0.0666667	122	16	0.131148	150	43	0.286667	137	46	0.335766	847	119	0.140496
G3	234	3	0.0128205	269	25	0.0929368	383	51	0.133159	349	72	0.206304	344	95	0.276163	1962	246	0.125382
eLife	552	12	0.0217391	879	26	0.0295791	1099	70	0.0636943	1317	248	0.188307	1172	394	0.336177	6118	750	0.122589
Nature Genetics	192	2	0.0104167	195	16	0.0820513	196	16	0.0816327	202	36	0.178218	188	55	0.292553	1169	125	0.106929
PLOS Computational Biology	545	7	0.012844	603	27	0.0447761	557	45	0.0807899	558	105	0.188172	490	153	0.312245	3310	337	0.101813
Molecular Biology and Evolution	275	6	0.0218182	262	20	0.0763359	265	31	0.116981	249	53	0.212851	228	47	0.20614	1544	157	0.101684
Bioinformatics	729	13	0.0178326	764	41	0.0536649	791	77	0.0973451	790	132	0.167089	829	209	0.252111	4694	472	0.100554
PLOS Biology	186	1	0.00537634	183	4	0.0218579	228	9	0.0394737	221	27	0.122172	333	67	0.201201	1379	108	0.0783176
PLOS Genetics	780	12	0.0153846	740	33	0.0445946	646	43	0.0665635	558	87	0.155914	515	117	0.227184	3885	292	0.0751609
Genome Biology and Evolution	258	4	0.0155039	260	11	0.0423077	290	18	0.062069	274	36	0.131387	199	40	0.201005	1571	109	0.0693826
mBio	352	0	0	393	1	0.00254453	401	11	0.0274314	463	32	0.0691145	373	64	0.171582	2383	108	0.045321
Molecular Biology of the Cell*	370	0	0	385	1	0.0025974	350	14	0.04	342	35	0.102339	215	38	0.176744	2012	88	0.0437376
BMC Bioinformatics	558	3	0.00537634	546	10	0.018315	523	22	0.042065	570	41	0.0719298	456	61	0.133772	3176	137	0.043136
NeuroImage	966	0	0	765	7	0.00915033	887	19	0.0214205	819	71	0.0866911	862	117	0.135731	5186	214	0.0412649
Molecular Ecology	380	2	0.00526316	360	10	0.0277778	377	15	0.0397878	436	33	0.0756881	315	32	0.101587	2245	92	0.04098
Development	431	0	0	366	2	0.00546448	387	10	0.0258398	365	40	0.109589	360	38	0.105556	2296	90	0.0391986
Biophysical Journal*	556	3	0.00539568	533	2	0.00375235	513	9	0.0175439	506	30	0.0592885	482	65	0.134855	3103	109	0.0351273
Nucleic Acids Research	1532	9	0.00587467	1281	18	0.0140515	1269	33	0.0260047	1403	90	0.0641483	1142	115	0.100701	7896	265	0.0335613
BMC Genomics	1285	9	0.00700389	1233	21	0.0170316	987	17	0.0172239	970	52	0.0536082	904	75	0.0829646	6366	174	0.0273327
Journal of Neuroscience	1486	3	0.00201884	1347	2	0.00148478	1014	8	0.00788955	931	61	0.0655209	777	98	0.126126	6569	172	0.0261836
Nature Communications	2792	5	0.00179083	3195	8	0.00250391	3526	42	0.0119115	4320	119	0.0275463	4979	355	0.0712995	22338	529	0.0236816
PNAS	3587	7	0.00195149	3281	25	0.00761963	3187	56	0.0175714	3260	132	0.0404908	3195	212	0.0663537	19697	432	0.0219323
Cell Reports	671	0	0	804	7	0.00870647	1062	11	0.0103578	2017	39	0.0193356	1230	79	0.0642276	6846	136	0.0198656
PeerJ	471	5	0.0106157	793	7	0.00882724	1280	19	0.0148437	1346	36	0.0267459	1877	53	0.0282365	7047	120	0.0170285
Scientific Reports	3940	1	0.000253807	10723	19	0.00177189	20541	100	0.00486831	24807	309	0.0124562	16899	398	0.0235517	97451	827	0.00848632
PLOS ONE	29781	32	0.00107451	27871	55	0.00197338	21677	89	0.00410573	19982	170	0.00850766	17021	395	0.0232066	138009	741	0.00536922
* - These journals are slightly different, in that the wide majority of their publications in this timeframe are classified as "meeting abstracts," not "articles." For consistency, only the "article" count is used here, though it's not clear how many published preprints were published under another classification.
