# Supplementary material for: Tracking the popularity and outcomes of all bioRxiv preprints
Source: eLife journal article supplement (doi:10.7554/elife.45133), 2019-04-24
Supplement: supp [file elife-45133-supp-v1.zip › elife_poa_e45133_Figure_5_source_data_1.csv]

article	downloads	journal
21370	210995	(unpublished)
14036	109309	(unpublished)
6917	46210	(unpublished)
6985	29701	(unpublished)
19809	25540	(unpublished)
28706	25076	(unpublished)
5201	23176	(unpublished)
27360	20401	(unpublished)
14736	19653	(unpublished)
7242	19167	(unpublished)
6708	13771	(unpublished)
8312	12749	(unpublished)
10078	11840	(unpublished)
4573	11269	(unpublished)
22935	11151	(unpublished)
7496	10658	(unpublished)
5665	10268	(unpublished)
9821	10193	(unpublished)
8728	10089	(unpublished)
34593	10065	(unpublished)
4675	9902	(unpublished)
22348	9838	(unpublished)
8634	9829	(unpublished)
8822	9328	(unpublished)
5737	8960	(unpublished)
16568	8835	(unpublished)
6951	8749	(unpublished)
6457	8611	(unpublished)
2225	8567	(unpublished)
8804	8403	(unpublished)
5722	8306	(unpublished)
11935	8178	(unpublished)
3844	8103	(unpublished)
3939	8052	(unpublished)
8548	8026	(unpublished)
3857	7983	(unpublished)
7222	7778	(unpublished)
12525	7693	(unpublished)
10694	7665	(unpublished)
9431	7608	(unpublished)
20741	7586	(unpublished)
3107	7504	(unpublished)
2547	7486	(unpublished)
15156	7116	(unpublished)
21855	6905	(unpublished)
7538	6872	(unpublished)
18864	6795	(unpublished)
9933	6664	(unpublished)
3300	6600	(unpublished)
8839	6551	(unpublished)
10358	6476	(unpublished)
26420	6445	(unpublished)
9852	6444	(unpublished)
13001	6440	(unpublished)
2916	6407	(unpublished)
2392	6284	(unpublished)
4669	6199	(unpublished)
16344	6033	(unpublished)
25500	6001	(unpublished)
1840	5996	(unpublished)
13012	5981	(unpublished)
24852	5972	(unpublished)
27258	5914	(unpublished)
1994	5875	(unpublished)
1957	5851	(unpublished)
18185	5780	(unpublished)
4348	5689	(unpublished)
5461	5663	(unpublished)
37420	5546	(unpublished)
16709	5541	(unpublished)
11930	5485	(unpublished)
19948	5470	(unpublished)
16804	5470	(unpublished)
2983	5466	(unpublished)
21581	5430	(unpublished)
10723	5368	(unpublished)
2779	5343	(unpublished)
5723	5335	(unpublished)
24615	5314	(unpublished)
5817	5260	(unpublished)
3042	5246	(unpublished)
4439	5218	(unpublished)
6655	5206	(unpublished)
5284	5188	(unpublished)
21328	5177	(unpublished)
21200	5137	(unpublished)
28726	5113	(unpublished)
16276	5103	(unpublished)
7935	5045	(unpublished)
3493	5036	(unpublished)
17992	5032	(unpublished)
8936	5029	(unpublished)
18262	4987	(unpublished)
1905	4970	(unpublished)
5488	4945	(unpublished)
13568	4892	(unpublished)
7763	4887	(unpublished)
6438	4885	(unpublished)
28638	4864	(unpublished)
7957	4722	(unpublished)
28608	4682	(unpublished)
17194	4672	(unpublished)
13884	4660	(unpublished)
17949	4599	(unpublished)
6933	4546	(unpublished)
21848	4537	(unpublished)
8291	4534	(unpublished)
3294	4526	(unpublished)
8307	4503	(unpublished)
3528	4434	(unpublished)
23149	4433	(unpublished)
21423	4392	(unpublished)
34156	4374	(unpublished)
21626	4327	(unpublished)
35794	4313	(unpublished)
15867	4273	(unpublished)
5514	4273	(unpublished)
4493	4271	(unpublished)
29844	4267	(unpublished)
9516	4262	(unpublished)
19040	4247	(unpublished)
25468	4226	(unpublished)
27067	4214	(unpublished)
7926	4212	(unpublished)
10637	4208	(unpublished)
11416	4200	(unpublished)
10691	4158	(unpublished)
29014	4143	(unpublished)
22934	4129	(unpublished)
28533	4119	(unpublished)
27732	4104	(unpublished)
7434	4097	(unpublished)
7388	4091	(unpublished)
1441	4081	(unpublished)
10730	4079	(unpublished)
5649	4075	(unpublished)
26196	4074	(unpublished)
20150	4065	(unpublished)
7469	4054	(unpublished)
20576	4050	(unpublished)
9056	4043	(unpublished)
21864	4035	(unpublished)
3341	4015	(unpublished)
8186	4014	(unpublished)
8202	4001	(unpublished)
12226	3986	(unpublished)
7007	3974	(unpublished)
8806	3961	(unpublished)
21852	3908	(unpublished)
7888	3893	(unpublished)
8503	3891	(unpublished)
30923	3870	(unpublished)
5385	3852	(unpublished)
4339	3821	(unpublished)
3471	3819	(unpublished)
17238	3811	(unpublished)
9228	3809	(unpublished)
10739	3800	(unpublished)
4487	3784	(unpublished)
22570	3776	(unpublished)
18337	3762	(unpublished)
10776	3750	(unpublished)
2891	3726	(unpublished)
38742	3712	(unpublished)
16516	3708	(unpublished)
28713	3698	(unpublished)
16703	3668	(unpublished)
21428	3659	(unpublished)
7716	3652	(unpublished)
5389	3650	(unpublished)
4865	3631	(unpublished)
3043	3626	(unpublished)
10603	3624	(unpublished)
26306	3618	(unpublished)
9400	3599	(unpublished)
31804	3598	(unpublished)
4810	3584	(unpublished)
14388	3576	(unpublished)
13911	3564	(unpublished)
3550	3564	(unpublished)
28444	3536	(unpublished)
13100	3535	(unpublished)
12080	3535	(unpublished)
9313	3527	(unpublished)
18202	3500	(unpublished)
8651	3498	(unpublished)
1621	3494	(unpublished)
9373	3482	(unpublished)
1596	3471	(unpublished)
29799	3443	(unpublished)
3762	3442	(unpublished)
3330	3434	(unpublished)
7029	3425	(unpublished)
28658	3420	(unpublished)
11611	3380	(unpublished)
14899	3378	(unpublished)
31862	3377	(unpublished)
16468	3359	(unpublished)
15630	3352	(unpublished)
8504	3344	(unpublished)
5539	3342	(unpublished)
13513	3327	(unpublished)
12492	3324	(unpublished)
7448	3323	(unpublished)
12826	3320	(unpublished)
28793	3314	(unpublished)
10190	3308	(unpublished)
24784	3305	(unpublished)
28971	3302	(unpublished)
4758	3295	(unpublished)
3437	3292	(unpublished)
8122	3291	(unpublished)
13420	3287	(unpublished)
2676	3261	(unpublished)
7837	3249	(unpublished)
22224	3217	(unpublished)
37097	3201	(unpublished)
5728	3179	(unpublished)
13032	3173	(unpublished)
9840	3172	(unpublished)
8405	3161	(unpublished)
2029	3151	(unpublished)
8468	3150	(unpublished)
4861	3140	(unpublished)
20979	3129	(unpublished)
7533	3127	(unpublished)
31486	3127	(unpublished)
4826	3126	(unpublished)
21583	3123	(unpublished)
8234	3116	(unpublished)
29414	3108	(unpublished)
8350	3105	(unpublished)
28565	3088	(unpublished)
8445	3087	(unpublished)
15173	3084	(unpublished)
38741	3071	(unpublished)
7796	3062	(unpublished)
2294	3054	(unpublished)
27521	3052	(unpublished)
26243	3040	(unpublished)
9408	3039	(unpublished)
7215	3036	(unpublished)
6644	3036	(unpublished)
33940	3034	(unpublished)
14605	3030	(unpublished)
16635	3024	(unpublished)
15887	3001	(unpublished)
8899	2993	(unpublished)
3521	2982	(unpublished)
7484	2981	(unpublished)
8390	2980	(unpublished)
2002	2973	(unpublished)
14019	2953	(unpublished)
15871	2940	(unpublished)
10368	2936	(unpublished)
24724	2932	(unpublished)
22064	2924	(unpublished)
1092	2924	(unpublished)
7352	2924	(unpublished)
25499	2918	(unpublished)
16670	2914	(unpublished)
4795	2910	(unpublished)
4432	2906	(unpublished)
4196	2902	(unpublished)
29350	2881	(unpublished)
12033	2861	(unpublished)
19840	2857	(unpublished)
19446	2852	(unpublished)
1752	2846	(unpublished)
32683	2843	(unpublished)
23205	2843	(unpublished)
22960	2829	(unpublished)
20210	2823	(unpublished)
7684	2811	(unpublished)
10620	2809	(unpublished)
30492	2808	(unpublished)
17549	2805	(unpublished)
14900	2802	(unpublished)
28816	2799	(unpublished)
9122	2791	(unpublished)
10601	2782	(unpublished)
9958	2773	(unpublished)
9524	2767	(unpublished)
7586	2766	(unpublished)
16181	2742	(unpublished)
36545	2740	(unpublished)
29190	2737	(unpublished)
8801	2731	(unpublished)
35104	2731	(unpublished)
29916	2727	(unpublished)
28653	2726	(unpublished)
33080	2708	(unpublished)
6955	2697	(unpublished)
12125	2692	(unpublished)
28507	2689	(unpublished)
8963	2689	(unpublished)
28556	2682	(unpublished)
21561	2671	(unpublished)
8087	2668	(unpublished)
3305	2667	(unpublished)
7433	2660	(unpublished)
3849	2660	(unpublished)
4793	2644	(unpublished)
2986	2643	(unpublished)
7995	2631	(unpublished)
5395	2620	(unpublished)
1648	2617	(unpublished)
7182	2611	(unpublished)
11154	2609	(unpublished)
24778	2602	(unpublished)
24431	2597	(unpublished)
20461	2591	(unpublished)
26808	2587	(unpublished)
2921	2583	(unpublished)
6986	2579	(unpublished)
28835	2576	(unpublished)
16552	2574	(unpublished)
23720	2570	(unpublished)
20086	2570	(unpublished)
27777	2569	(unpublished)
9552	2558	(unpublished)
29062	2558	(unpublished)
35353	2557	(unpublished)
7106	2555	(unpublished)
7402	2551	(unpublished)
5148	2550	(unpublished)
31552	2547	(unpublished)
38681	2543	(unpublished)
35295	2543	(unpublished)
14691	2541	(unpublished)
10068	2525	(unpublished)
29024	2517	(unpublished)
5778	2512	(unpublished)
7813	2512	(unpublished)
26851	2509	(unpublished)
1859	2501	(unpublished)
29895	2497	(unpublished)
5400	2494	(unpublished)
5155	2492	(unpublished)
1448	2485	(unpublished)
25624	2482	(unpublished)
4525	2475	(unpublished)
4069	2473	(unpublished)
8496	2472	(unpublished)
27482	2471	(unpublished)
12212	2468	(unpublished)
2719	2465	(unpublished)
9268	2462	(unpublished)
4184	2462	(unpublished)
2217	2459	(unpublished)
16440	2451	(unpublished)
22764	2442	(unpublished)
22378	2442	(unpublished)
5377	2442	(unpublished)
21807	2441	(unpublished)
7408	2439	(unpublished)
9647	2439	(unpublished)
7200	2436	(unpublished)
8831	2436	(unpublished)
7110	2435	(unpublished)
5509	2429	(unpublished)
3412	2426	(unpublished)
35822	2426	(unpublished)
5397	2421	(unpublished)
3441	2419	(unpublished)
8747	2416	(unpublished)
21055	2414	(unpublished)
5373	2412	(unpublished)
2429	2412	(unpublished)
7675	2408	(unpublished)
1898	2401	(unpublished)
19963	2398	(unpublished)
5081	2397	(unpublished)
20027	2391	(unpublished)
27319	2388	(unpublished)
8379	2382	(unpublished)
12784	2372	(unpublished)
1796	2372	(unpublished)
19738	2367	(unpublished)
28775	2363	(unpublished)
4932	2358	(unpublished)
28604	2356	(unpublished)
28536	2356	(unpublished)
22277	2352	(unpublished)
20056	2349	(unpublished)
29092	2344	(unpublished)
8140	2341	(unpublished)
26273	2338	(unpublished)
7639	2336	(unpublished)
22234	2335	(unpublished)
22818	2328	(unpublished)
8689	2326	(unpublished)
7117	2323	(unpublished)
1921	2320	(unpublished)
10698	2319	(unpublished)
5439	2315	(unpublished)
7399	2308	(unpublished)
13876	2300	(unpublished)
31073	2299	(unpublished)
29019	2298	(unpublished)
19816	2297	(unpublished)
23291	2295	(unpublished)
16643	2293	(unpublished)
4980	2291	(unpublished)
27321	2290	(unpublished)
17956	2289	(unpublished)
28611	2288	(unpublished)
29381	2288	(unpublished)
10170	2284	(unpublished)
19311	2282	(unpublished)
29731	2282	(unpublished)
13808	2281	(unpublished)
38764	2277	(unpublished)
25128	2277	(unpublished)
8252	2273	(unpublished)
2084	2262	(unpublished)
8187	2260	(unpublished)
21075	2258	(unpublished)
10118	2258	(unpublished)
1591	2255	(unpublished)
13817	2254	(unpublished)
29911	2251	(unpublished)
7845	2250	(unpublished)
14638	2247	(unpublished)
22784	2244	(unpublished)
28788	2237	(unpublished)
16650	2232	(unpublished)
9693	2232	(unpublished)
4649	2228	(unpublished)
3027	2226	(unpublished)
9600	2226	(unpublished)
3751	2224	(unpublished)
32689	2222	(unpublished)
8818	2222	(unpublished)
26335	2222	(unpublished)
16611	2221	(unpublished)
26169	2221	(unpublished)
1645	2219	(unpublished)
5583	2205	(unpublished)
7158	2204	(unpublished)
2433	2203	(unpublished)
22840	2203	(unpublished)
22588	2201	(unpublished)
8867	2200	(unpublished)
8714	2198	(unpublished)
3183	2195	(unpublished)
13361	2190	(unpublished)
12645	2190	(unpublished)
4462	2190	(unpublished)
2234	2189	(unpublished)
15577	2188	(unpublished)
5178	2187	(unpublished)
7178	2185	(unpublished)
10717	2181	(unpublished)
3122	2178	(unpublished)
21825	2170	(unpublished)
4700	2169	(unpublished)
9353	2165	(unpublished)
14766	2161	(unpublished)
9144	2161	(unpublished)
4935	2159	(unpublished)
6724	2155	(unpublished)
3814	2155	(unpublished)
18280	2151	(unpublished)
2005	2151	(unpublished)
27467	2150	(unpublished)
27684	2146	(unpublished)
10636	2146	(unpublished)
5619	2146	(unpublished)
5832	2140	(unpublished)
7848	2130	(unpublished)
15492	2127	(unpublished)
12533	2126	(unpublished)
24135	2126	(unpublished)
26479	2119	(unpublished)
28586	2117	(unpublished)
20102	2114	(unpublished)
29006	2112	(unpublished)
24059	2111	(unpublished)
27344	2111	(unpublished)
3354	2109	(unpublished)
7294	2106	(unpublished)
33204	2104	(unpublished)
13923	2099	(unpublished)
30814	2099	(unpublished)
8486	2095	(unpublished)
3226	2094	(unpublished)
18268	2091	(unpublished)
4644	2089	(unpublished)
6843	2083	(unpublished)
17198	2080	(unpublished)
2277	2078	(unpublished)
18239	2077	(unpublished)
9390	2070	(unpublished)
25098	2068	(unpublished)
4672	2068	(unpublished)
14905	2067	(unpublished)
1576	2066	(unpublished)
4100	2066	(unpublished)
4436	2064	(unpublished)
8816	2060	(unpublished)
10606	2057	(unpublished)
1951	2056	(unpublished)
7937	2051	(unpublished)
26421	2040	(unpublished)
31767	2017	(unpublished)
20524	2016	(unpublished)
25536	2016	(unpublished)
17640	2014	(unpublished)
27224	2014	(unpublished)
30202	2014	(unpublished)
2017	2010	(unpublished)
27063	2009	(unpublished)
5347	2009	(unpublished)
15794	2007	(unpublished)
22562	2006	(unpublished)
5587	2005	(unpublished)
23196	2003	(unpublished)
27251	1998	(unpublished)
4511	1997	(unpublished)
33199	1997	(unpublished)
4854	1987	(unpublished)
35726	1984	(unpublished)
9502	1982	(unpublished)
8383	1982	(unpublished)
6857	1976	(unpublished)
2544	1976	(unpublished)
13339	1975	(unpublished)
29034	1974	(unpublished)
5770	1970	(unpublished)
30364	1960	(unpublished)
17208	1958	(unpublished)
5707	1958	(unpublished)
17964	1952	(unpublished)
38660	1949	(unpublished)
13738	1935	(unpublished)
27694	1932	(unpublished)
13768	1926	(unpublished)
28645	1924	(unpublished)
21853	1924	(unpublished)
6808	1924	(unpublished)
7787	1918	(unpublished)
2006	1917	(unpublished)
31246	1916	(unpublished)
2798	1915	(unpublished)
5295	1914	(unpublished)
5208	1911	(unpublished)
32983	1907	(unpublished)
27728	1906	(unpublished)
8863	1903	(unpublished)
7712	1902	(unpublished)
1927	1899	(unpublished)
30929	1893	(unpublished)
20018	1889	(unpublished)
8638	1889	(unpublished)
18273	1885	(unpublished)
24735	1884	(unpublished)
8171	1881	(unpublished)
17784	1881	(unpublished)
24367	1880	(unpublished)
28240	1878	(unpublished)
28805	1878	(unpublished)
32686	1877	(unpublished)
11893	1876	(unpublished)
2586	1875	(unpublished)
34992	1874	(unpublished)
13191	1874	(unpublished)
12237	1873	(unpublished)
22089	1872	(unpublished)
2743	1872	(unpublished)
1634	1870	(unpublished)
10729	1865	(unpublished)
25242	1864	(unpublished)
6155	1861	(unpublished)
3084	1857	(unpublished)
9847	1853	(unpublished)
9403	1851	(unpublished)
21520	1850	(unpublished)
3314	1849	(unpublished)
26437	1847	(unpublished)
10248	1845	(unpublished)
30160	1843	(unpublished)
15976	1838	(unpublished)
20443	1836	(unpublished)
33553	1835	(unpublished)
22572	1834	(unpublished)
13539	1831	(unpublished)
4901	1831	(unpublished)
5030	1828	(unpublished)
22842	1828	(unpublished)
33371	1827	(unpublished)
4344	1825	(unpublished)
23709	1825	(unpublished)
23561	1824	(unpublished)
4858	1823	(unpublished)
9641	1818	(unpublished)
3004	1816	(unpublished)
22867	1814	(unpublished)
1964	1814	(unpublished)
2030	1813	(unpublished)
10595	1812	(unpublished)
7079	1811	(unpublished)
19847	1811	(unpublished)
24105	1809	(unpublished)
32442	1803	(unpublished)
11857	1802	(unpublished)
8593	1800	(unpublished)
3499	1798	(unpublished)
13363	1797	(unpublished)
28337	1797	(unpublished)
7630	1795	(unpublished)
4349	1794	(unpublished)
4463	1793	(unpublished)
16429	1793	(unpublished)
14067	1793	(unpublished)
20775	1792	(unpublished)
18052	1788	(unpublished)
864	1788	(unpublished)
7124	1785	(unpublished)
22397	1783	(unpublished)
11989	1781	(unpublished)
3585	1779	(unpublished)
32108	1776	(unpublished)
8501	1774	(unpublished)
7224	1772	(unpublished)
4748	1770	(unpublished)
1809	1769	(unpublished)
26853	1768	(unpublished)
11744	1768	(unpublished)
4321	1764	(unpublished)
15343	1763	(unpublished)
11412	1760	(unpublished)
8656	1758	(unpublished)
4367	1752	(unpublished)
7177	1752	(unpublished)
29130	1751	(unpublished)
26558	1750	(unpublished)
9354	1749	(unpublished)
31979	1745	(unpublished)
1281	1745	(unpublished)
15730	1741	(unpublished)
6705	1741	(unpublished)
6969	1740	(unpublished)
8111	1739	(unpublished)
14739	1739	(unpublished)
24325	1739	(unpublished)
1779	1738	(unpublished)
14651	1737	(unpublished)
25537	1735	(unpublished)
22615	1734	(unpublished)
10047	1733	(unpublished)
13185	1732	(unpublished)
21967	1731	(unpublished)
20546	1729	(unpublished)
29954	1725	(unpublished)
9464	1725	(unpublished)
28136	1724	(unpublished)
14946	1723	(unpublished)
7588	1722	(unpublished)
20642	1718	(unpublished)
1943	1717	(unpublished)
16676	1713	(unpublished)
20486	1713	(unpublished)
4640	1713	(unpublished)
30908	1712	(unpublished)
8133	1712	(unpublished)
31146	1711	(unpublished)
20923	1707	(unpublished)
22983	1706	(unpublished)
16506	1704	(unpublished)
26689	1703	(unpublished)
5585	1701	(unpublished)
2859	1701	(unpublished)
4342	1700	(unpublished)
14479	1698	(unpublished)
29861	1697	(unpublished)
1537	1696	(unpublished)
5666	1694	(unpublished)
16237	1694	(unpublished)
27149	1694	(unpublished)
31605	1692	(unpublished)
2468	1689	(unpublished)
16508	1686	(unpublished)
6656	1685	(unpublished)
18359	1683	(unpublished)
15710	1682	(unpublished)
33844	1681	(unpublished)
11992	1680	(unpublished)
20501	1679	(unpublished)
4820	1679	(unpublished)
23217	1674	(unpublished)
34464	1673	(unpublished)
2262	1672	(unpublished)
4954	1671	(unpublished)
27987	1670	(unpublished)
15236	1669	(unpublished)
1930	1668	(unpublished)
15989	1666	(unpublished)
3296	1664	(unpublished)
1910	1664	(unpublished)
30436	1664	(unpublished)
4067	1661	(unpublished)
13763	1661	(unpublished)
1822	1660	(unpublished)
10180	1659	(unpublished)
9697	1659	(unpublished)
8826	1658	(unpublished)
27275	1656	(unpublished)
26849	1655	(unpublished)
3444	1653	(unpublished)
28550	1650	(unpublished)
7873	1649	(unpublished)
14386	1648	(unpublished)
23536	1647	(unpublished)
5189	1646	(unpublished)
9195	1642	(unpublished)
28537	1641	(unpublished)
17450	1640	(unpublished)
25015	1639	(unpublished)
19425	1638	(unpublished)
24050	1638	(unpublished)
1588	1638	(unpublished)
19675	1638	(unpublished)
29746	1636	(unpublished)
18223	1636	(unpublished)
14695	1635	(unpublished)
9243	1634	(unpublished)
9057	1633	(unpublished)
15273	1632	(unpublished)
1939	1632	(unpublished)
4976	1626	(unpublished)
20052	1626	(unpublished)
6761	1624	(unpublished)
12682	1623	(unpublished)
10527	1620	(unpublished)
19558	1618	(unpublished)
21885	1617	(unpublished)
18853	1615	(unpublished)
1856	1610	(unpublished)
4767	1609	(unpublished)
5704	1609	(unpublished)
6554	1608	(unpublished)
3831	1603	(unpublished)
3356	1603	(unpublished)
34312	1601	(unpublished)
3614	1600	(unpublished)
7489	1599	(unpublished)
7281	1598	(unpublished)
13183	1598	(unpublished)
33211	1596	(unpublished)
23694	1593	(unpublished)
28948	1593	(unpublished)
28601	1592	(unpublished)
4597	1592	(unpublished)
12131	1592	(unpublished)
11483	1589	(unpublished)
12615	1588	(unpublished)
4941	1586	(unpublished)
9290	1586	(unpublished)
3336	1581	(unpublished)
1629	1580	(unpublished)
27721	1580	(unpublished)
4447	1580	(unpublished)
5192	1577	(unpublished)
26900	1577	(unpublished)
16022	1574	(unpublished)
19283	1574	(unpublished)
28840	1573	(unpublished)
19038	1573	(unpublished)
3765	1571	(unpublished)
16695	1570	(unpublished)
16699	1570	(unpublished)
7071	1567	(unpublished)
3830	1565	(unpublished)
6982	1564	(unpublished)
4687	1563	(unpublished)
4645	1561	(unpublished)
33843	1559	(unpublished)
6305	1558	(unpublished)
4654	1557	(unpublished)
3718	1556	(unpublished)
10284	1554	(unpublished)
3103	1553	(unpublished)
7638	1553	(unpublished)
3507	1552	(unpublished)
3088	1550	(unpublished)
20453	1548	(unpublished)
17475	1548	(unpublished)
13309	1547	(unpublished)
5237	1545	(unpublished)
13656	1545	(unpublished)
15903	1541	(unpublished)
21433	1537	(unpublished)
1683	1537	(unpublished)
27079	1537	(unpublished)
8779	1535	(unpublished)
34939	1534	(unpublished)
5337	1533	(unpublished)
16633	1527	(unpublished)
4916	1527	(unpublished)
2395	1524	(unpublished)
7685	1523	(unpublished)
33015	1519	(unpublished)
31707	1518	(unpublished)
32115	1518	(unpublished)
33486	1516	(unpublished)
28812	1513	(unpublished)
7409	1512	(unpublished)
8037	1512	(unpublished)
35347	1512	(unpublished)
11037	1510	(unpublished)
25000	1510	(unpublished)
27335	1509	(unpublished)
4542	1508	(unpublished)
5158	1504	(unpublished)
27725	1502	(unpublished)
27377	1500	(unpublished)
22720	1499	(unpublished)
17513	1497	(unpublished)
627	1497	(unpublished)
24849	1496	(unpublished)
6849	1495	(unpublished)
2664	1495	(unpublished)
3288	1491	(unpublished)
15130	1488	(unpublished)
26518	1487	(unpublished)
36973	1486	(unpublished)
6008	1485	(unpublished)
1845	1485	(unpublished)
15406	1485	(unpublished)
11891	1484	(unpublished)
2968	1484	(unpublished)
6138	1482	(unpublished)
24876	1482	(unpublished)
2612	1481	(unpublished)
9992	1481	(unpublished)
14224	1479	(unpublished)
8711	1479	(unpublished)
2227	1479	(unpublished)
4863	1478	(unpublished)
12196	1477	(unpublished)
29953	1476	(unpublished)
12068	1475	(unpublished)
8106	1474	(unpublished)
22567	1473	(unpublished)
9199	1473	(unpublished)
3312	1472	(unpublished)
3654	1472	(unpublished)
7515	1472	(unpublished)
2691	1471	(unpublished)
24773	1470	(unpublished)
29234	1470	(unpublished)
7817	1469	(unpublished)
7736	1468	(unpublished)
21846	1466	(unpublished)
30541	1466	(unpublished)
10184	1465	(unpublished)
29409	1464	(unpublished)
28521	1464	(unpublished)
25993	1463	(unpublished)
15758	1462	(unpublished)
7467	1459	(unpublished)
13216	1458	(unpublished)
21485	1458	(unpublished)
16615	1454	(unpublished)
4374	1453	(unpublished)
29945	1447	(unpublished)
3572	1446	(unpublished)
26457	1446	(unpublished)
24911	1445	(unpublished)
11193	1444	(unpublished)
9177	1444	(unpublished)
3003	1443	(unpublished)
11393	1442	(unpublished)
1936	1442	(unpublished)
3777	1441	(unpublished)
10276	1441	(unpublished)
28639	1439	(unpublished)
2389	1439	(unpublished)
15279	1439	(unpublished)
28486	1438	(unpublished)
12401	1438	(unpublished)
14494	1437	(unpublished)
36084	1436	(unpublished)
19848	1436	(unpublished)
14534	1435	(unpublished)
32898	1435	(unpublished)
20639	1432	(unpublished)
33083	1432	(unpublished)
6899	1431	(unpublished)
34117	1430	(unpublished)
2450	1427	(unpublished)
16445	1426	(unpublished)
7044	1426	(unpublished)
9462	1426	(unpublished)
11497	1426	(unpublished)
20078	1426	(unpublished)
24114	1426	(unpublished)
25286	1424	(unpublished)
17472	1424	(unpublished)
26509	1423	(unpublished)
36964	1422	(unpublished)
25333	1422	(unpublished)
8623	1422	(unpublished)
23309	1420	(unpublished)
4695	1419	(unpublished)
14360	1419	(unpublished)
7405	1416	(unpublished)
2491	1414	(unpublished)
28958	1414	(unpublished)
12730	1413	(unpublished)
5453	1413	(unpublished)
7903	1413	(unpublished)
22702	1413	(unpublished)
5258	1411	(unpublished)
9246	1411	(unpublished)
16169	1410	(unpublished)
5448	1410	(unpublished)
17687	1408	(unpublished)
2898	1407	(unpublished)
7432	1405	(unpublished)
15380	1404	(unpublished)
23031	1404	(unpublished)
21792	1403	(unpublished)
9166	1402	(unpublished)
29785	1399	(unpublished)
38709	1398	(unpublished)
7063	1398	(unpublished)
1950	1397	(unpublished)
22474	1396	(unpublished)
28792	1396	(unpublished)
7946	1393	(unpublished)
32687	1392	(unpublished)
13258	1392	(unpublished)
7644	1392	(unpublished)
18776	1391	(unpublished)
12187	1391	(unpublished)
23808	1390	(unpublished)
7320	1389	(unpublished)
16599	1389	(unpublished)
30028	1386	(unpublished)
5113	1382	(unpublished)
3000	1382	(unpublished)
14176	1382	(unpublished)
7060	1382	(unpublished)
11322	1380	(unpublished)
4822	1379	(unpublished)
22296	1378	(unpublished)
9962	1378	(unpublished)
26018	1378	(unpublished)
1816	1378	(unpublished)
13050	1378	(unpublished)
9596	1376	(unpublished)
4199	1376	(unpublished)
2844	1376	(unpublished)
2847	1375	(unpublished)
36477	1375	(unpublished)
8774	1375	(unpublished)
29248	1373	(unpublished)
7967	1373	(unpublished)
3410	1373	(unpublished)
11466	1372	(unpublished)
5764	1372	(unpublished)
16723	1372	(unpublished)
15802	1371	(unpublished)
12979	1370	(unpublished)
7616	1369	(unpublished)
7268	1369	(unpublished)
3105	1367	(unpublished)
19574	1367	(unpublished)
24659	1366	(unpublished)
21562	1365	(unpublished)
10454	1363	(unpublished)
5206	1362	(unpublished)
2624	1362	(unpublished)
29412	1361	(unpublished)
18112	1357	(unpublished)
28624	1355	(unpublished)
5393	1354	(unpublished)
27355	1354	(unpublished)
5223	1353	(unpublished)
4134	1353	(unpublished)
38801	1352	(unpublished)
29594	1352	(unpublished)
5528	1352	(unpublished)
21530	1352	(unpublished)
5438	1352	(unpublished)
24902	1351	(unpublished)
15979	1351	(unpublished)
10528	1350	(unpublished)
27062	1349	(unpublished)
27366	1349	(unpublished)
12318	1348	(unpublished)
28727	1345	(unpublished)
26537	1343	(unpublished)
7069	1341	(unpublished)
10714	1341	(unpublished)
1461	1340	(unpublished)
7424	1340	(unpublished)
483	1339	(unpublished)
20587	1339	(unpublished)
13632	1338	(unpublished)
23887	1337	(unpublished)
8336	1336	(unpublished)
2316	1336	(unpublished)
34197	1336	(unpublished)
4643	1335	(unpublished)
21737	1333	(unpublished)
19856	1332	(unpublished)
2098	1332	(unpublished)
6752	1331	(unpublished)
27699	1331	(unpublished)
15543	1330	(unpublished)
30174	1330	(unpublished)
4183	1330	(unpublished)
17530	1330	(unpublished)
23593	1329	(unpublished)
11543	1328	(unpublished)
2708	1328	(unpublished)
36648	1326	(unpublished)
5326	1326	(unpublished)
25082	1326	(unpublished)
17907	1325	(unpublished)
20570	1325	(unpublished)
25916	1324	(unpublished)
18532	1323	(unpublished)
4495	1323	(unpublished)
20521	1323	(unpublished)
32192	1322	(unpublished)
21729	1320	(unpublished)
29207	1320	(unpublished)
1842	1320	(unpublished)
2786	1319	(unpublished)
10107	1318	(unpublished)
8726	1318	(unpublished)
20165	1317	(unpublished)
31426	1317	(unpublished)
3772	1317	(unpublished)
33862	1316	(unpublished)
5221	1316	(unpublished)
5613	1316	(unpublished)
2961	1314	(unpublished)
24870	1314	(unpublished)
25508	1313	(unpublished)
16530	1312	(unpublished)
7769	1312	(unpublished)
6230	1312	(unpublished)
8210	1310	(unpublished)
15975	1309	(unpublished)
4887	1309	(unpublished)
26548	1308	(unpublished)
24344	1308	(unpublished)
2243	1307	(unpublished)
6821	1307	(unpublished)
10259	1306	(unpublished)
23326	1305	(unpublished)
7058	1304	(unpublished)
32103	1304	(unpublished)
25972	1302	(unpublished)
3067	1301	(unpublished)
10057	1301	(unpublished)
4839	1300	(unpublished)
5270	1299	(unpublished)
27525	1298	(unpublished)
30495	1298	(unpublished)
6390	1298	(unpublished)
4778	1298	(unpublished)
10032	1297	(unpublished)
5752	1297	(unpublished)
8083	1296	(unpublished)
26183	1296	(unpublished)
16356	1295	(unpublished)
11742	1295	(unpublished)
11535	1293	(unpublished)
28333	1292	(unpublished)
18433	1292	(unpublished)
13492	1291	(unpublished)
12459	1291	(unpublished)
2108	1290	(unpublished)
3539	1289	(unpublished)
5289	1289	(unpublished)
8423	1289	(unpublished)
28665	1287	(unpublished)
7326	1286	(unpublished)
12337	1285	(unpublished)
24886	1285	(unpublished)
7574	1284	(unpublished)
9150	1282	(unpublished)
2661	1282	(unpublished)
3963	1282	(unpublished)
23073	1281	(unpublished)
9871	1281	(unpublished)
30790	1280	(unpublished)
8605	1279	(unpublished)
15680	1278	(unpublished)
9136	1278	(unpublished)
4307	1278	(unpublished)
4631	1277	(unpublished)
2988	1277	(unpublished)
11537	1276	(unpublished)
4468	1274	(unpublished)
26789	1274	(unpublished)
35325	1272	(unpublished)
17254	1272	(unpublished)
1421	1271	(unpublished)
5553	1271	(unpublished)
13255	1271	(unpublished)
8589	1271	(unpublished)
18221	1268	(unpublished)
22177	1268	(unpublished)
23214	1267	(unpublished)
2222	1267	(unpublished)
2946	1267	(unpublished)
31130	1267	(unpublished)
9911	1267	(unpublished)
4621	1267	(unpublished)
23939	1264	(unpublished)
2474	1264	(unpublished)
34807	1262	(unpublished)
19147	1262	(unpublished)
20077	1262	(unpublished)
16021	1259	(unpublished)
4491	1258	(unpublished)
31188	1258	(unpublished)
2172	1258	(unpublished)
7130	1257	(unpublished)
4460	1257	(unpublished)
17242	1257	(unpublished)
26524	1256	(unpublished)
13070	1256	(unpublished)
32688	1255	(unpublished)
30248	1255	(unpublished)
27962	1254	(unpublished)
27424	1254	(unpublished)
26735	1252	(unpublished)
24293	1251	(unpublished)
26897	1250	(unpublished)
20800	1249	(unpublished)
11998	1249	(unpublished)
34669	1249	(unpublished)
14836	1246	(unpublished)
5582	1246	(unpublished)
4444	1246	(unpublished)
30954	1246	(unpublished)
7025	1246	(unpublished)
8015	1245	(unpublished)
1724	1245	(unpublished)
4612	1244	(unpublished)
29467	1244	(unpublished)
23404	1243	(unpublished)
5031	1243	(unpublished)
19447	1242	(unpublished)
6696	1241	(unpublished)
29004	1241	(unpublished)
11990	1240	(unpublished)
20450	1240	(unpublished)
36388	1239	(unpublished)
25828	1239	(unpublished)
9085	1236	(unpublished)
5251	1236	(unpublished)
24869	1236	(unpublished)
12699	1235	(unpublished)
7207	1235	(unpublished)
3291	1233	(unpublished)
29387	1231	(unpublished)
9964	1230	(unpublished)
11401	1230	(unpublished)
9798	1229	(unpublished)
8648	1228	(unpublished)
13067	1227	(unpublished)
11590	1225	(unpublished)
29880	1224	(unpublished)
12903	1223	(unpublished)
2511	1223	(unpublished)
26898	1218	(unpublished)
9083	1218	(unpublished)
5053	1217	(unpublished)
7573	1217	(unpublished)
14553	1216	(unpublished)
27222	1214	(unpublished)
10814	1214	(unpublished)
10343	1214	(unpublished)
26681	1213	(unpublished)
9928	1213	(unpublished)
8993	1212	(unpublished)
7880	1212	(unpublished)
10293	1210	(unpublished)
29987	1208	(unpublished)
6964	1207	(unpublished)
5771	1207	(unpublished)
5197	1207	(unpublished)
15737	1207	(unpublished)
8811	1207	(unpublished)
31321	1206	(unpublished)
3677	1205	(unpublished)
5798	1204	(unpublished)
5137	1204	(unpublished)
13305	1203	(unpublished)
6776	1203	(unpublished)
24867	1202	(unpublished)
15308	1202	(unpublished)
7592	1201	(unpublished)
30073	1196	(unpublished)
7543	1196	(unpublished)
29752	1195	(unpublished)
32235	1195	(unpublished)
3944	1194	(unpublished)
7615	1194	(unpublished)
16362	1193	(unpublished)
23776	1192	(unpublished)
2009	1191	(unpublished)
28694	1191	(unpublished)
35947	1191	(unpublished)
14793	1190	(unpublished)
2790	1190	(unpublished)
11900	1189	(unpublished)
7253	1188	(unpublished)
17576	1187	(unpublished)
17890	1187	(unpublished)
20448	1185	(unpublished)
24257	1185	(unpublished)
12253	1185	(unpublished)
18299	1185	(unpublished)
3770	1185	(unpublished)
3039	1184	(unpublished)
27082	1184	(unpublished)
13719	1183	(unpublished)
21881	1183	(unpublished)
1499	1182	(unpublished)
12209	1182	(unpublished)
29960	1181	(unpublished)
21052	1180	(unpublished)
21241	1180	(unpublished)
6961	1180	(unpublished)
28126	1179	(unpublished)
1868	1179	(unpublished)
14131	1178	(unpublished)
19312	1178	(unpublished)
31602	1178	(unpublished)
21104	1178	(unpublished)
7012	1178	(unpublished)
26268	1178	(unpublished)
8109	1178	(unpublished)
1702	1178	(unpublished)
28656	1177	(unpublished)
34410	1176	(unpublished)
36045	1176	(unpublished)
4593	1175	(unpublished)
23643	1175	(unpublished)
27616	1174	(unpublished)
4377	1173	(unpublished)
9752	1173	(unpublished)
2239	1173	(unpublished)
34130	1173	(unpublished)
12439	1172	(unpublished)
3668	1172	(unpublished)
13008	1172	(unpublished)
7278	1171	(unpublished)
7540	1171	(unpublished)
2280	1170	(unpublished)
34855	1169	(unpublished)
28517	1167	(unpublished)
32179	1167	(unpublished)
11484	1166	(unpublished)
6980	1166	(unpublished)
34907	1166	(unpublished)
20945	1166	(unpublished)
6232	1165	(unpublished)
4744	1165	(unpublished)
4837	1164	(unpublished)
24444	1164	(unpublished)
7280	1160	(unpublished)
3179	1160	(unpublished)
35958	1160	(unpublished)
24162	1160	(unpublished)
34162	1159	(unpublished)
10471	1159	(unpublished)
4150	1159	(unpublished)
3505	1159	(unpublished)
2631	1159	(unpublished)
28632	1159	(unpublished)
27461	1158	(unpublished)
25196	1158	(unpublished)
6738	1157	(unpublished)
28425	1157	(unpublished)
27505	1157	(unpublished)
28210	1157	(unpublished)
12366	1156	(unpublished)
3549	1156	(unpublished)
2461	1156	(unpublished)
4870	1155	(unpublished)
2495	1155	(unpublished)
15996	1155	(unpublished)
6239	1154	(unpublished)
12520	1153	(unpublished)
5092	1152	(unpublished)
9858	1152	(unpublished)
1619	1152	(unpublished)
12353	1152	(unpublished)
8921	1151	(unpublished)
7649	1151	(unpublished)
3097	1151	(unpublished)
38786	1150	(unpublished)
9414	1148	(unpublished)
29317	1147	(unpublished)
22571	1147	(unpublished)
7853	1147	(unpublished)
4701	1146	(unpublished)
6735	1146	(unpublished)
32644	1146	(unpublished)
26128	1146	(unpublished)
14710	1144	(unpublished)
1694	1144	(unpublished)
5621	1144	(unpublished)
12299	1143	(unpublished)
27528	1143	(unpublished)
28618	1143	(unpublished)
15593	1141	(unpublished)
2333	1140	(unpublished)
7169	1140	(unpublished)
8381	1139	(unpublished)
14253	1138	(unpublished)
24586	1137	(unpublished)
16197	1136	(unpublished)
29995	1135	(unpublished)
6947	1134	(unpublished)
13807	1134	(unpublished)
2331	1133	(unpublished)
4705	1132	(unpublished)
14271	1131	(unpublished)
24459	1131	(unpublished)
30527	1131	(unpublished)
8696	1131	(unpublished)
2577	1130	(unpublished)
13524	1130	(unpublished)
13347	1127	(unpublished)
16532	1127	(unpublished)
31277	1126	(unpublished)
21500	1125	(unpublished)
4130	1124	(unpublished)
3810	1124	(unpublished)
19187	1124	(unpublished)
4698	1124	(unpublished)
2943	1123	(unpublished)
5738	1122	(unpublished)
11674	1122	(unpublished)
3761	1121	(unpublished)
29469	1121	(unpublished)
1873	1121	(unpublished)
29025	1120	(unpublished)
21605	1120	(unpublished)
26195	1120	(unpublished)
29047	1119	(unpublished)
10103	1117	(unpublished)
17332	1117	(unpublished)
27212	1116	(unpublished)
15162	1114	(unpublished)
6418	1112	(unpublished)
33315	1111	(unpublished)
33935	1111	(unpublished)
15707	1111	(unpublished)
30315	1109	(unpublished)
13217	1109	(unpublished)
3207	1108	(unpublished)
32568	1108	(unpublished)
7301	1108	(unpublished)
2315	1107	(unpublished)
13682	1107	(unpublished)
21808	1107	(unpublished)
32933	1107	(unpublished)
22430	1107	(unpublished)
35777	1107	(unpublished)
30750	1106	(unpublished)
3326	1106	(unpublished)
11304	1104	(unpublished)
11571	1103	(unpublished)
2240	1103	(unpublished)
4465	1101	(unpublished)
21790	1101	(unpublished)
13385	1100	(unpublished)
21714	1100	(unpublished)
1903	1100	(unpublished)
21837	1100	(unpublished)
16415	1099	(unpublished)
1369	1099	(unpublished)
30818	1099	(unpublished)
7828	1098	(unpublished)
1064	1098	(unpublished)
21732	1098	(unpublished)
3461	1096	(unpublished)
18016	1096	(unpublished)
28589	1095	(unpublished)
10083	1095	(unpublished)
15997	1095	(unpublished)
18237	1094	(unpublished)
2551	1094	(unpublished)
18058	1091	(unpublished)
17193	1091	(unpublished)
16001	1091	(unpublished)
3415	1090	(unpublished)
13805	1090	(unpublished)
18265	1090	(unpublished)
7991	1089	(unpublished)
30496	1088	(unpublished)
34627	1088	(unpublished)
23346	1088	(unpublished)
9229	1088	(unpublished)
26530	1087	(unpublished)
5009	1086	(unpublished)
27929	1085	(unpublished)
8264	1085	(unpublished)
8177	1085	(unpublished)
33246	1084	(unpublished)
28721	1084	(unpublished)
34654	1083	(unpublished)
38767	1081	(unpublished)
36088	1081	(unpublished)
6518	1080	(unpublished)
20856	1079	(unpublished)
28535	1079	(unpublished)
5339	1079	(unpublished)
28836	1077	(unpublished)
19399	1076	(unpublished)
5479	1076	(unpublished)
26592	1076	(unpublished)
10840	1074	(unpublished)
7702	1074	(unpublished)
13917	1071	(unpublished)
6489	1071	(unpublished)
19754	1070	(unpublished)
25181	1070	(unpublished)
29022	1070	(unpublished)
28610	1068	(unpublished)
27031	1068	(unpublished)
14051	1068	(unpublished)
20942	1067	(unpublished)
8327	1067	(unpublished)
21838	1067	(unpublished)
20907	1066	(unpublished)
37153	1066	(unpublished)
26836	1065	(unpublished)
23237	1065	(unpublished)
2724	1063	(unpublished)
2411	1062	(unpublished)
17128	1062	(unpublished)
30165	1062	(unpublished)
26580	1062	(unpublished)
8066	1061	(unpublished)
1659	1060	(unpublished)
9654	1060	(unpublished)
25709	1059	(unpublished)
19315	1059	(unpublished)
12724	1059	(unpublished)
4082	1058	(unpublished)
30501	1058	(unpublished)
6259	1057	(unpublished)
23611	1057	(unpublished)
18677	1057	(unpublished)
28236	1057	(unpublished)
23198	1057	(unpublished)
23582	1056	(unpublished)
4876	1056	(unpublished)
5576	1055	(unpublished)
37145	1055	(unpublished)
28635	1055	(unpublished)
11250	1054	(unpublished)
11436	1053	(unpublished)
29874	1053	(unpublished)
3209	1051	(unpublished)
4910	1051	(unpublished)
5404	1051	(unpublished)
18689	1051	(unpublished)
13765	1051	(unpublished)
4635	1050	(unpublished)
23177	1050	(unpublished)
3779	1050	(unpublished)
26743	1049	(unpublished)
32226	1049	(unpublished)
19436	1048	(unpublished)
28919	1048	(unpublished)
26497	1048	(unpublished)
4907	1048	(unpublished)
27357	1047	(unpublished)
3775	1047	(unpublished)
4481	1047	(unpublished)
486	1046	(unpublished)
27296	1046	(unpublished)
30103	1046	(unpublished)
3282	1046	(unpublished)
29668	1046	(unpublished)
24249	1045	(unpublished)
7234	1045	(unpublished)
21301	1044	(unpublished)
8204	1044	(unpublished)
7585	1043	(unpublished)
28272	1043	(unpublished)
2337	1043	(unpublished)
3151	1042	(unpublished)
22492	1042	(unpublished)
14401	1042	(unpublished)
23226	1041	(unpublished)
5748	1041	(unpublished)
5150	1040	(unpublished)
4900	1040	(unpublished)
3723	1039	(unpublished)
8166	1039	(unpublished)
15125	1038	(unpublished)
9233	1038	(unpublished)
13194	1037	(unpublished)
24460	1037	(unpublished)
4066	1036	(unpublished)
8070	1036	(unpublished)
14642	1036	(unpublished)
35661	1034	(unpublished)
21989	1034	(unpublished)
15649	1034	(unpublished)
9386	1034	(unpublished)
12283	1034	(unpublished)
4249	1033	(unpublished)
35740	1033	(unpublished)
7987	1033	(unpublished)
34201	1033	(unpublished)
4964	1033	(unpublished)
5109	1032	(unpublished)
3284	1032	(unpublished)
12612	1032	(unpublished)
28376	1031	(unpublished)
24130	1031	(unpublished)
5531	1030	(unpublished)
30180	1030	(unpublished)
8287	1029	(unpublished)
21278	1029	(unpublished)
13943	1028	(unpublished)
15134	1027	(unpublished)
8002	1027	(unpublished)
30029	1027	(unpublished)
9272	1026	(unpublished)
6991	1026	(unpublished)
25240	1025	(unpublished)
31134	1025	(unpublished)
10164	1025	(unpublished)
11174	1025	(unpublished)
20040	1024	(unpublished)
26454	1024	(unpublished)
25955	1023	(unpublished)
1483	1023	(unpublished)
13318	1023	(unpublished)
29054	1022	(unpublished)
23422	1022	(unpublished)
16212	1021	(unpublished)
31365	1021	(unpublished)
9767	1021	(unpublished)
10196	1021	(unpublished)
21356	1020	(unpublished)
10342	1020	(unpublished)
1731	1019	(unpublished)
5268	1018	(unpublished)
29120	1018	(unpublished)
9685	1017	(unpublished)
5152	1017	(unpublished)
9008	1017	(unpublished)
16047	1017	(unpublished)
1635	1016	(unpublished)
7511	1015	(unpublished)
2500	1015	(unpublished)
15186	1015	(unpublished)
32290	1014	(unpublished)
23469	1014	(unpublished)
5560	1014	(unpublished)
31759	1013	(unpublished)
31031	1013	(unpublished)
26443	1013	(unpublished)
31988	1013	(unpublished)
26677	1012	(unpublished)
1709	1012	(unpublished)
34540	1011	(unpublished)
2524	1011	(unpublished)
22787	1011	(unpublished)
514	1011	(unpublished)
8842	1010	(unpublished)
3957	1009	(unpublished)
7924	1009	(unpublished)
15632	1009	(unpublished)
13079	1009	(unpublished)
23240	1008	(unpublished)
4688	1008	(unpublished)
3262	1006	(unpublished)
4304	1005	(unpublished)
28538	1005	(unpublished)
10001	1005	(unpublished)
15963	1005	(unpublished)
10421	1004	(unpublished)
1893	1004	(unpublished)
12152	1002	(unpublished)
2275	1002	(unpublished)
10625	1000	(unpublished)
14449	1000	(unpublished)
9512	1000	(unpublished)
8415	1000	(unpublished)
10242	1000	(unpublished)
17167	999	(unpublished)
8761	999	(unpublished)
13486	999	(unpublished)
3472	998	(unpublished)
1237	998	(unpublished)
8016	998	(unpublished)
23618	998	(unpublished)
16496	998	(unpublished)
16298	997	(unpublished)
17077	996	(unpublished)
14683	996	(unpublished)
26673	995	(unpublished)
29706	995	(unpublished)
21859	995	(unpublished)
18848	995	(unpublished)
5342	994	(unpublished)
10153	994	(unpublished)
22494	993	(unpublished)
3739	993	(unpublished)
26552	993	(unpublished)
20930	993	(unpublished)
8165	993	(unpublished)
29001	993	(unpublished)
13431	993	(unpublished)
11701	993	(unpublished)
29581	992	(unpublished)
21601	992	(unpublished)
20998	991	(unpublished)
2293	991	(unpublished)
4358	990	(unpublished)
28239	990	(unpublished)
8580	990	(unpublished)
29228	989	(unpublished)
14963	989	(unpublished)
8672	989	(unpublished)
21471	989	(unpublished)
33023	989	(unpublished)
38645	989	(unpublished)
14456	988	(unpublished)
12847	988	(unpublished)
10312	987	(unpublished)
5082	987	(unpublished)
804	986	(unpublished)
12785	986	(unpublished)
10644	986	(unpublished)
20401	985	(unpublished)
9895	984	(unpublished)
30373	984	(unpublished)
30595	984	(unpublished)
12406	984	(unpublished)
22765	984	(unpublished)
12282	983	(unpublished)
4568	983	(unpublished)
8303	982	(unpublished)
15648	982	(unpublished)
16579	981	(unpublished)
5538	981	(unpublished)
29353	980	(unpublished)
2431	979	(unpublished)
28707	978	(unpublished)
16469	977	(unpublished)
21453	977	(unpublished)
33033	976	(unpublished)
19345	976	(unpublished)
15031	976	(unpublished)
11936	976	(unpublished)
18401	976	(unpublished)
13983	975	(unpublished)
13628	975	(unpublished)
19266	975	(unpublished)
4461	974	(unpublished)
6064	974	(unpublished)
17700	973	(unpublished)
22418	972	(unpublished)
7762	972	(unpublished)
11980	972	(unpublished)
5222	972	(unpublished)
10037	972	(unpublished)
35673	971	(unpublished)
11853	971	(unpublished)
25219	971	(unpublished)
8823	971	(unpublished)
6719	971	(unpublished)
26665	971	(unpublished)
28856	970	(unpublished)
24151	970	(unpublished)
16290	969	(unpublished)
11426	969	(unpublished)
4779	969	(unpublished)
25233	968	(unpublished)
7446	967	(unpublished)
5515	967	(unpublished)
36725	967	(unpublished)
24345	967	(unpublished)
19707	967	(unpublished)
6652	967	(unpublished)
28015	967	(unpublished)
21804	966	(unpublished)
22169	965	(unpublished)
26694	965	(unpublished)
3432	965	(unpublished)
2463	965	(unpublished)
26402	965	(unpublished)
33120	965	(unpublished)
33959	964	(unpublished)
30460	963	(unpublished)
15953	962	(unpublished)
4329	962	(unpublished)
5950	962	(unpublished)
5403	962	(unpublished)
32246	962	(unpublished)
4825	962	(unpublished)
4240	960	(unpublished)
1052	960	(unpublished)
29552	960	(unpublished)
1925	960	(unpublished)
9727	960	(unpublished)
4220	959	(unpublished)
7420	958	(unpublished)
21000	958	(unpublished)
36571	958	(unpublished)
26083	958	(unpublished)
28081	957	(unpublished)
8584	957	(unpublished)
4014	956	(unpublished)
16639	956	(unpublished)
26733	956	(unpublished)
15957	955	(unpublished)
2905	955	(unpublished)
3246	954	(unpublished)
19414	954	(unpublished)
29872	954	(unpublished)
8404	954	(unpublished)
31229	954	(unpublished)
29624	953	(unpublished)
21169	953	(unpublished)
21886	953	(unpublished)
30437	952	(unpublished)
15363	951	(unpublished)
8019	951	(unpublished)
26903	951	(unpublished)
29755	951	(unpublished)
25557	951	(unpublished)
28839	950	(unpublished)
1615	949	(unpublished)
13152	949	(unpublished)
13897	949	(unpublished)
24434	949	(unpublished)
27191	949	(unpublished)
27401	949	(unpublished)
24295	949	(unpublished)
30192	949	(unpublished)
1125	948	(unpublished)
8453	947	(unpublished)
19410	947	(unpublished)
12944	947	(unpublished)
26263	946	(unpublished)
16811	945	(unpublished)
3297	945	(unpublished)
22061	945	(unpublished)
9404	945	(unpublished)
9743	945	(unpublished)
18605	944	(unpublished)
27733	944	(unpublished)
29032	943	(unpublished)
19336	943	(unpublished)
21799	943	(unpublished)
2827	942	(unpublished)
3941	942	(unpublished)
2652	942	(unpublished)
3238	942	(unpublished)
35377	941	(unpublished)
4894	941	(unpublished)
11827	941	(unpublished)
34298	941	(unpublished)
31206	941	(unpublished)
15253	940	(unpublished)
470	940	(unpublished)
2794	940	(unpublished)
16502	939	(unpublished)
28160	939	(unpublished)
7010	939	(unpublished)
12161	939	(unpublished)
5843	939	(unpublished)
8206	937	(unpublished)
18409	937	(unpublished)
23318	937	(unpublished)
4697	936	(unpublished)
26523	936	(unpublished)
38690	936	(unpublished)
1835	936	(unpublished)
24855	935	(unpublished)
11552	935	(unpublished)
16546	934	(unpublished)
12524	934	(unpublished)
30369	934	(unpublished)
28155	934	(unpublished)
7524	933	(unpublished)
4655	933	(unpublished)
5899	933	(unpublished)
9138	933	(unpublished)
7642	933	(unpublished)
3187	933	(unpublished)
5760	932	(unpublished)
3347	932	(unpublished)
13161	931	(unpublished)
18162	931	(unpublished)
4680	931	(unpublished)
35403	931	(unpublished)
8417	930	(unpublished)
14832	930	(unpublished)
1360	930	(unpublished)
8459	930	(unpublished)
5768	930	(unpublished)
16669	930	(unpublished)
30830	929	(unpublished)
5624	929	(unpublished)
36076	929	(unpublished)
14914	929	(unpublished)
12993	928	(unpublished)
21569	928	(unpublished)
22212	928	(unpublished)
944	928	(unpublished)
7338	928	(unpublished)
4389	927	(unpublished)
15453	927	(unpublished)
4009	927	(unpublished)
19358	926	(unpublished)
5398	926	(unpublished)
25635	925	(unpublished)
13669	925	(unpublished)
10536	924	(unpublished)
35553	924	(unpublished)
13316	924	(unpublished)
7729	923	(unpublished)
6740	923	(unpublished)
28620	923	(unpublished)
1688	923	(unpublished)
3875	922	(unpublished)
20938	921	(unpublished)
18534	921	(unpublished)
6618	921	(unpublished)
27297	921	(unpublished)
25193	921	(unpublished)
19368	921	(unpublished)
20827	921	(unpublished)
17211	920	(unpublished)
22322	919	(unpublished)
6878	919	(unpublished)
6879	918	(unpublished)
29705	918	(unpublished)
28809	918	(unpublished)
12289	918	(unpublished)
27166	918	(unpublished)
3323	918	(unpublished)
19207	917	(unpublished)
10697	917	(unpublished)
11566	917	(unpublished)
23805	917	(unpublished)
16388	917	(unpublished)
20028	916	(unpublished)
2437	916	(unpublished)
29696	916	(unpublished)
28732	915	(unpublished)
7844	915	(unpublished)
8649	915	(unpublished)
30494	915	(unpublished)
9328	914	(unpublished)
4010	914	(unpublished)
21354	914	(unpublished)
6967	914	(unpublished)
30095	913	(unpublished)
29266	912	(unpublished)
15922	912	(unpublished)
28532	912	(unpublished)
6103	912	(unpublished)
19467	912	(unpublished)
26114	911	(unpublished)
34240	910	(unpublished)
4740	910	(unpublished)
12386	910	(unpublished)
2879	909	(unpublished)
19995	909	(unpublished)
6172	909	(unpublished)
35628	908	(unpublished)
3726	908	(unpublished)
11305	908	(unpublished)
14681	907	(unpublished)
9269	907	(unpublished)
10563	907	(unpublished)
23818	907	(unpublished)
7599	907	(unpublished)
31855	906	(unpublished)
28988	906	(unpublished)
25612	906	(unpublished)
16634	906	(unpublished)
37376	905	(unpublished)
13875	905	(unpublished)
8705	904	(unpublished)
13240	904	(unpublished)
21082	903	(unpublished)
29892	903	(unpublished)
30411	902	(unpublished)
28360	902	(unpublished)
18857	902	(unpublished)
6607	901	(unpublished)
9813	901	(unpublished)
18139	901	(unpublished)
8821	901	(unpublished)
23911	900	(unpublished)
20017	900	(unpublished)
12967	900	(unpublished)
35228	900	(unpublished)
26430	900	(unpublished)
30132	900	(unpublished)
16585	899	(unpublished)
34915	898	(unpublished)
7213	898	(unpublished)
16050	897	(unpublished)
7201	897	(unpublished)
26151	897	(unpublished)
23838	897	(unpublished)
9637	897	(unpublished)
15394	897	(unpublished)
33643	896	(unpublished)
26407	896	(unpublished)
11550	896	(unpublished)
26612	896	(unpublished)
1926	894	(unpublished)
15689	894	(unpublished)
4298	894	(unpublished)
20610	894	(unpublished)
29684	894	(unpublished)
3468	894	(unpublished)
6072	894	(unpublished)
10649	893	(unpublished)
4384	893	(unpublished)
1977	892	(unpublished)
7799	892	(unpublished)
3265	891	(unpublished)
7809	891	(unpublished)
35862	891	(unpublished)
9213	890	(unpublished)
31839	890	(unpublished)
26519	890	(unpublished)
34892	889	(unpublished)
3322	888	(unpublished)
8551	888	(unpublished)
4194	888	(unpublished)
25132	887	(unpublished)
21832	887	(unpublished)
28353	887	(unpublished)
15454	887	(unpublished)
11722	886	(unpublished)
13206	886	(unpublished)
29027	886	(unpublished)
1089	886	(unpublished)
24063	885	(unpublished)
24232	885	(unpublished)
3381	885	(unpublished)
7389	885	(unpublished)
13114	885	(unpublished)
9717	884	(unpublished)
29113	884	(unpublished)
13508	884	(unpublished)
16002	884	(unpublished)
7752	883	(unpublished)
21802	883	(unpublished)
27003	883	(unpublished)
29579	882	(unpublished)
9009	882	(unpublished)
29805	882	(unpublished)
22289	882	(unpublished)
1918	882	(unpublished)
11961	881	(unpublished)
9673	881	(unpublished)
18877	881	(unpublished)
22025	881	(unpublished)
31128	880	(unpublished)
22284	880	(unpublished)
5455	880	(unpublished)
26639	879	(unpublished)
31072	879	(unpublished)
21527	879	(unpublished)
17779	879	(unpublished)
29339	878	(unpublished)
20862	878	(unpublished)
1624	878	(unpublished)
7258	878	(unpublished)
4583	878	(unpublished)
4440	877	(unpublished)
19225	877	(unpublished)
38696	877	(unpublished)
1756	877	(unpublished)
12837	876	(unpublished)
15150	876	(unpublished)
16106	876	(unpublished)
13129	876	(unpublished)
4735	876	(unpublished)
[truncated: 27,435 more rows]
