# Supplementary material for: Tracking the popularity and outcomes of all bioRxiv preprints
Source: eLife journal article supplement (doi:10.7554/elife.45133), 2019-04-24
Supplement: supp [file elife-45133-supp-v1.zip › elife_poa_e45133_Figure_5_source_data_2.csv]

journal	impact	Access	note
Bioinformatics	5.481	Hybrid or closed access	***authors can "self-archive" after a year***
Biophysical Journal	3.495	Hybrid or closed access	open after 12 months
BMC Bioinformatics	2.213	Immediately open access
BMC Genomics	3.73	Immediately open access
Cell Reports	8.032	Immediately open access
Development	5.413	Hybrid or closed access	after 6 months
eLife	7.616	Immediately open access
G3	2.742	Immediately open access
Genetics	4.075	Hybrid or closed access	after 12 months
Genome Biology	13.214	Immediately open access
Genome Biology and Evolution	3.94	Immediately open access
Genome Research	10.101	Hybrid or closed access	after 6 months
Molecular Ecology	6.131	Hybrid or closed access
Journal of Neuroscience	5.971	Hybrid or closed access
mBio	6.689	Immediately open access
Molecular Biology and Evolution	10.217	Hybrid or closed access	"hybrid"
Molecular Biology of the Cell	3.512	Hybrid or closed access	after 2 months
Nature Communications	12.353	Immediately open access
Nature Genetics	27.125	Hybrid or closed access
Nature Methods	26.919	Hybrid or closed access
NeuroImage	5.426	Hybrid or closed access	hybrid
Nucleic Acids Research	11.561	Immediately open access
PeerJ	2.118	Immediately open access
PLOS Biology	9.163	Immediately open access
PLOS Computational Biology	3.955	Immediately open access
PLOS Genetics	5.54	Immediately open access
PLOS ONE	2.766	Immediately open access
PNAS	9.504	Hybrid or closed access	hybrid
Scientific Reports	4.122	Immediately open access
GigaScience	7.267	Immediately open access
