# Supplementary material for: Tracking the popularity and outcomes of all bioRxiv preprints
Source: eLife journal article supplement (doi:10.7554/elife.45133), 2019-04-24
Supplement: supp [file elife-45133-supp-v1.zip › elife_poa_e45133_Figure_6_source_data_1.csv]

id	year	collection	published	interval
5617	2014	bioinformatics	2018-07-01	1371
2967	2015	bioinformatics	2018-10-19	1312
19435	2014	ecology	2018-02-27	1309
6760	2014	microbiology	2017-06-15	1126
8845	2013	genomics	2016-11-29	1113
25587	2014	evolutionary biology	2017-12-15	1095
5779	2013	bioinformatics	2016-10-13	1063
16624	2015	neuroscience	2018-04-04	1051
18517	2015	ecology	2018-08-14	1045
26221	2014	evolutionary biology	2017-06-26	1019
5392	2015	bioinformatics	2018-07-01	960
5435	2015	bioinformatics	2018-05-17	957
5374	2015	bioinformatics	2018-06-28	945
24519	2016	evolutionary biology	2018-08-15	936
1523	2015	microbiology	2018-05-15	923
30050	2015	systems biology	2017-12-06	911
5645	2014	bioinformatics	2017-05-15	903
10990	2016	biochemistry	2018-07-13	891
10600	2015	genetics	2017-12-21	888
30051	2015	systems biology	2017-10-18	866
5763	2014	bioinformatics	2016-06-13	864
4549	2016	bioinformatics	2018-07-04	860
4921	2015	bioinformatics	2017-12-30	836
16124	2014	neuroscience	2017-04-10	832
28351	2015	plant biology	2017-07-06	829
14653	2015	neuroscience	2018-03-06	825
5282	2016	bioinformatics	2018-05-31	823
5755	2014	bioinformatics	2016-05-23	819
4639	2015	bioinformatics	2017-09-18	817
13630	2016	neuroscience	2018-04-03	814
8299	2014	genomics	2016-11-09	810
18791	2015	ecology	2018-03-07	805
26272	2015	evolutionary biology	2018-01-29	805
25998	2016	evolutionary biology	2018-10-03	804
7792	2015	genomics	2017-11-06	804
3998	2015	bioinformatics	2018-02-06	802
7969	2015	genomics	2018-01-31	798
9732	2016	genetics	2018-06-21	796
25337	2015	evolutionary biology	2017-09-13	791
26056	2016	evolutionary biology	2018-07-30	788
8630	2015	genomics	2017-08-28	785
6869	2016	genomics	2018-09-19	783
25771	2016	evolutionary biology	2018-05-24	782
29021	2015	synthetic biology	2017-05-18	780
16119	2014	neuroscience	2016-11-19	778
11320	2015	biochemistry	2017-08-14	776
5323	2016	bioinformatics	2018-02-27	773
19406	2015	ecology	2017-03-10	770
21628	2015	cancer biology	2017-07-19	760
18876	2016	ecology	2018-04-02	756
24873	2016	evolutionary biology	2018-06-28	755
9722	2015	genetics	2018-01-03	754
25907	2016	evolutionary biology	2018-10-11	751
30027	2015	systems biology	2017-10-30	747
9237	2016	genetics	2018-08-14	747
8599	2015	genomics	2017-08-29	746
21317	2016	cancer biology	2018-11-06	745
18753	2016	ecology	2018-10-26	744
24129	2014	developmental biology	2016-02-05	744
8837	2013	genomics	2015-12-22	733
8456	2016	genomics	2018-02-08	721
25092	2015	evolutionary biology	2017-12-06	719
7874	2015	genomics	2017-05-08	708
29888	2015	systems biology	2017-12-04	707
5456	2015	bioinformatics	2017-08-11	705
13801	2016	neuroscience	2018-11-13	702
5561	2015	bioinformatics	2017-01-10	699
16331	2016	neuroscience	2018-03-01	698
16520	2014	neuroscience	2016-07-02	693
26495	2015	evolutionary biology	2016-12-22	687
15789	2015	neuroscience	2017-06-10	687
27480	2016	molecular biology	2018-03-15	685
8692	2015	genomics	2016-12-22	684
10621	2014	genetics	2016-11-07	684
1758	2016	genomics	2018-04-23	682
26565	2014	evolutionary biology	2016-03-30	681
23163	2016	cell biology	2018-01-19	680
25496	2015	evolutionary biology	2017-09-29	673
5677	2014	bioinformatics	2016-07-19	673
15164	2016	neuroscience	2018-04-12	670
28605	2017	scientific communication and education	2018-11-20	670
26149	2016	evolutionary biology	2017-11-29	668
4408	2016	bioinformatics	2017-11-03	667
18241	2016	bioengineering	2018-01-12	667
18220	2017	bioengineering	2018-11-08	666
10400	2016	genetics	2017-11-08	665
5767	2014	bioinformatics	2015-11-19	665
10456	2016	genetics	2017-12-28	660
8449	2016	genomics	2017-12-13	659
8495	2016	genomics	2017-10-19	657
8000	2017	genomics	2018-11-08	657
28474	2016	plant biology	2018-01-16	656
5183	2016	bioinformatics	2018-02-08	654
26049	2016	evolutionary biology	2018-03-25	654
20451	2014	physiology	2016-09-22	654
24079	2015	developmental biology	2017-01-04	652
26352	2015	evolutionary biology	2017-06-14	651
27393	2017	molecular biology	2018-11-21	651
6959	2016	genomics	2018-09-24	649
16524	2015	neuroscience	2017-09-08	648
11610	2017	neuroscience	2018-10-08	645
23993	2017	developmental biology	2018-10-24	644
15510	2015	neuroscience	2017-07-26	644
27458	2016	molecular biology	2018-05-17	644
16535	2016	neuroscience	2017-10-13	644
10415	2016	genetics	2018-01-22	643
29012	2016	synthetic biology	2018-03-19	643
5421	2014	bioinformatics	2016-08-08	643
7718	2016	genomics	2018-02-15	643
26305	2015	evolutionary biology	2017-07-11	641
2710	2017	bioinformatics	2018-10-31	641
23856	2016	developmental biology	2017-10-26	640
4763	2015	bioinformatics	2017-08-17	638
25238	2016	evolutionary biology	2017-10-26	637
1782	2017	genomics	2018-10-22	636
28728	2014	scientific communication and education	2016-07-05	636
4848	2016	bioinformatics	2018-07-18	635
16274	2016	neuroscience	2018-05-18	635
7495	2016	genomics	2017-12-11	635
7369	2017	genomics	2018-11-09	633
1340	2016	microbiology	2018-03-08	631
24697	2017	evolutionary biology	2018-10-17	630
24404	2017	evolutionary biology	2018-11-09	630
10556	2015	genetics	2017-06-28	629
8700	2015	genomics	2016-10-11	629
8521	2015	genomics	2017-03-09	629
8588	2015	genomics	2017-05-22	629
24110	2014	developmental biology	2016-08-30	627
8235	2016	genomics	2018-04-26	626
15014	2017	neuroscience	2018-10-22	626
6714	2015	microbiology	2017-07-21	625
10816	2017	biochemistry	2018-10-09	625
26531	2014	evolutionary biology	2016-07-11	625
8386	2016	genomics	2017-12-28	624
25859	2016	evolutionary biology	2018-07-19	624
24903	2016	evolutionary biology	2018-02-20	623
6570	2016	microbiology	2018-05-16	623
29961	2016	systems biology	2018-01-18	623
26199	2016	evolutionary biology	2017-10-25	622
5254	2016	bioinformatics	2017-11-27	621
9361	2017	genetics	2018-10-08	619
7733	2016	genomics	2018-08-30	618
4960	2015	bioinformatics	2017-03-06	618
21781	2016	cancer biology	2018-04-04	617
19205	2016	ecology	2017-11-23	616
8244	2016	genomics	2018-04-09	615
24022	2016	developmental biology	2018-02-27	615
1948	2016	genomics	2018-06-05	613
8707	2015	genomics	2016-09-17	613
23150	2016	cell biology	2018-02-16	612
19168	2016	ecology	2018-06-29	611
26485	2014	evolutionary biology	2016-06-10	610
24839	2016	evolutionary biology	2018-03-19	607
3232	2017	bioinformatics	2018-11-01	607
4827	2015	bioinformatics	2017-02-06	606
1312	2017	microbiology	2018-09-01	605
13907	2016	neuroscience	2018-01-28	604
17049	2016	epidemiology	2018-05-04	603
21800	2016	cancer biology	2018-01-12	603
3757	2016	bioinformatics	2018-04-25	603
4187	2016	bioinformatics	2018-01-05	602
16656	2015	neuroscience	2016-09-23	601
25570	2016	evolutionary biology	2018-06-18	601
26464	2014	evolutionary biology	2015-12-01	601
14806	2016	neuroscience	2017-11-20	600
2987	2016	bioinformatics	2018-07-17	599
23912	2016	developmental biology	2018-02-02	597
15371	2017	neuroscience	2018-10-23	597
3781	2016	bioinformatics	2017-11-23	597
19466	2013	ecology	2015-07-14	596
4937	2015	bioinformatics	2017-04-03	596
3382	2016	bioinformatics	2018-06-22	595
10106	2017	genetics	2018-10-01	595
12002	2017	neuroscience	2018-08-20	594
16527	2016	neuroscience	2017-08-21	594
27723	2016	pharmacology and toxicology	2017-11-27	593
16292	2016	neuroscience	2018-03-20	593
16610	2014	neuroscience	2016-06-27	593
16213	2016	neuroscience	2018-05-05	592
25596	2017	evolutionary biology	2018-11-20	592
7952	2016	genomics	2017-08-24	590
10031	2017	genetics	2018-11-09	589
25601	2015	evolutionary biology	2017-04-19	589
31163	2013	biophysics	2015-07-30	588
15478	2017	neuroscience	2018-09-24	588
5139	2015	bioinformatics	2016-09-29	588
38723	2017	epidemiology	2018-08-21	585
4569	2017	bioinformatics	2018-10-04	584
7074	2016	genomics	2018-07-09	584
26036	2016	evolutionary biology	2018-01-18	582
18421	2016	ecology	2018-07-16	582
24017	2016	developmental biology	2018-06-26	582
13579	2016	neuroscience	2018-04-26	582
16488	2016	neuroscience	2017-09-04	581
19343	2015	ecology	2016-12-02	581
8578	2015	genomics	2016-09-29	581
19101	2017	ecology	2018-09-19	580
10203	2016	genetics	2017-10-05	580
5977	2016	microbiology	2018-06-13	579
7043	2017	genomics	2018-10-19	578
21747	2016	cancer biology	2018-07-13	578
7429	2017	genomics	2018-09-14	577
25801	2016	evolutionary biology	2018-06-28	577
5616	2015	bioinformatics	2016-09-01	577
5041	2015	bioinformatics	2017-01-05	576
9972	2016	genetics	2018-01-09	576
8180	2016	genomics	2017-10-19	576
21867	2015	cancer biology	2016-09-28	575
30865	2017	biophysics	2018-11-15	575
16064	2016	neuroscience	2018-06-12	575
7593	2016	genomics	2017-11-16	573
15074	2016	neuroscience	2017-11-03	572
17765	2016	zoology	2017-11-03	572
6440	2017	microbiology	2018-08-23	572
18747	2016	ecology	2018-05-25	571
29862	2016	systems biology	2017-08-21	571
19072	2017	ecology	2018-10-16	571
3298	2017	bioinformatics	2018-09-21	570
16534	2016	neuroscience	2017-08-02	570
28222	2016	plant biology	2018-03-12	570
29758	2017	systems biology	2018-11-24	568
30075	2014	systems biology	2016-07-01	568
11746	2017	neuroscience	2018-10-19	567
8178	2016	genomics	2018-04-05	567
10435	2016	genetics	2017-10-17	567
15415	2015	neuroscience	2017-06-27	567
8191	2016	genomics	2018-03-27	567
26350	2015	evolutionary biology	2017-03-22	566
8232	2016	genomics	2018-02-26	566
21313	2016	cancer biology	2018-06-20	566
25485	2016	evolutionary biology	2018-07-09	566
7965	2017	genomics	2018-08-21	564
29871	2016	systems biology	2018-05-25	564
19317	2016	ecology	2017-09-04	563
23065	2016	cell biology	2018-07-04	563
21588	2017	cancer biology	2018-09-10	563
26304	2014	evolutionary biology	2016-06-04	562
28457	2016	plant biology	2017-12-19	562
19325	2015	ecology	2016-08-18	561
4709	2016	bioinformatics	2018-07-06	561
9873	2017	genetics	2018-10-20	560
23724	2016	developmental biology	2018-02-16	560
29804	2017	systems biology	2018-09-20	560
8247	2015	genomics	2017-06-02	560
10077	2017	genetics	2018-09-13	559
24127	2014	developmental biology	2015-11-24	558
11378	2017	biochemistry	2018-10-16	557
16602	2014	neuroscience	2016-05-07	557
21640	2016	cancer biology	2018-04-23	556
5726	2014	bioinformatics	2015-11-30	556
21745	2016	cancer biology	2018-06-22	555
25608	2016	evolutionary biology	2018-01-18	555
26167	2016	evolutionary biology	2017-09-13	554
24126	2014	developmental biology	2015-11-30	553
8251	2016	genomics	2018-01-29	553
3069	2016	bioinformatics	2018-05-23	553
24898	2017	evolutionary biology	2018-09-25	553
8420	2016	genomics	2017-09-25	553
23182	2016	cell biology	2017-09-15	553
18980	2016	ecology	2018-02-21	552
9252	2017	genetics	2018-08-13	552
14481	2016	neuroscience	2018-02-03	552
5773	2013	bioinformatics	2015-06-17	552
8119	2016	genomics	2018-05-07	551
7823	2016	genomics	2018-04-24	550
3089	2016	bioinformatics	2018-04-17	549
15414	2015	neuroscience	2017-06-05	549
15507	2016	neuroscience	2017-12-11	547
26492	2015	evolutionary biology	2016-09-06	547
16628	2014	neuroscience	2015-10-23	547
38770	2016	epidemiology	2018-03-09	547
26170	2015	evolutionary biology	2017-06-15	547
17001	2016	epidemiology	2018-04-27	547
5776	2013	bioinformatics	2015-06-01	546
21722	2017	cancer biology	2018-08-14	546
28629	2017	scientific communication and education	2018-08-20	546
10005	2017	genetics	2018-10-20	544
14435	2017	neuroscience	2018-08-16	544
4931	2016	bioinformatics	2018-03-09	543
17772	2015	zoology	2016-10-18	543
3591	2017	bioinformatics	2018-08-23	542
26357	2015	evolutionary biology	2017-02-16	542
19350	2015	ecology	2017-04-21	542
19077	2017	ecology	2018-09-11	542
14556	2016	neuroscience	2018-06-11	542
17796	2013	zoology	2015-06-18	541
20851	2017	animal behavior and cognition	2018-07-22	541
5026	2016	bioinformatics	2018-01-18	541
5644	2014	bioinformatics	2016-04-21	540
5011	2016	bioinformatics	2018-01-24	540
10325	2016	genetics	2018-01-11	539
14300	2016	neuroscience	2018-04-05	539
14470	2017	neuroscience	2018-06-28	538
21733	2017	cancer biology	2018-07-02	538
24333	2017	evolutionary biology	2018-11-19	537
29950	2016	systems biology	2017-11-03	536
5333	2015	bioinformatics	2016-09-14	535
10577	2015	genetics	2017-02-23	534
5255	2016	bioinformatics	2017-08-31	534
14957	2017	neuroscience	2018-08-18	534
7566	2017	genomics	2018-09-06	533
6413	2017	microbiology	2018-07-20	532
2606	2017	bioinformatics	2018-10-08	531
9019	2017	genetics	2018-06-28	531
4604	2016	bioinformatics	2017-08-31	531
7871	2017	genomics	2018-09-10	531
6508	2016	microbiology	2018-04-25	530
17777	2016	zoology	2017-07-05	530
8075	2016	genomics	2018-05-21	530
1929	2016	genomics	2018-05-23	530
7099	2017	genomics	2018-11-06	529
28453	2016	plant biology	2017-12-01	528
25247	2017	evolutionary biology	2018-10-24	527
19768	2017	immunology	2018-11-16	527
30077	2014	systems biology	2016-05-19	527
4962	2016	bioinformatics	2018-01-02	526
7359	2017	genomics	2018-07-20	525
4739	2016	bioinformatics	2018-05-18	525
25272	2017	evolutionary biology	2018-06-25	525
3615	2016	bioinformatics	2018-01-23	524
7789	2017	genomics	2018-10-15	524
7869	2017	genomics	2018-09-05	524
25928	2016	evolutionary biology	2018-02-12	524
20871	2016	animal behavior and cognition	2018-04-17	524
8231	2015	genomics	2016-10-04	523
26190	2015	evolutionary biology	2017-01-13	522
29677	2016	systems biology	2017-11-20	522
21738	2016	cancer biology	2018-05-28	522
4559	2017	bioinformatics	2018-08-08	521
8228	2016	genomics	2018-01-15	521
10110	2016	genetics	2018-04-19	521
7864	2017	genomics	2018-09-08	520
12486	2017	neuroscience	2018-10-18	519
15969	2016	neuroscience	2017-10-31	519
18923	2017	ecology	2018-07-20	518
30044	2015	systems biology	2016-12-14	518
24044	2016	developmental biology	2017-11-02	517
30037	2014	systems biology	2015-10-25	517
38634	2017	ecology	2018-11-22	517
8540	2015	genomics	2017-04-12	517
24841	2016	evolutionary biology	2018-05-21	517
2730	2017	bioinformatics	2018-08-13	517
23122	2016	cell biology	2018-02-12	517
20891	2016	animal behavior and cognition	2017-11-29	516
3011	2017	bioinformatics	2018-06-29	516
9120	2017	genetics	2018-08-06	516
6510	2016	microbiology	2018-04-09	514
25837	2015	evolutionary biology	2017-01-27	514
23378	2017	developmental biology	2018-09-07	514
12394	2017	neuroscience	2018-08-23	514
20029	2016	immunology	2017-07-06	513
29585	2017	systems biology	2018-07-05	513
25591	2016	evolutionary biology	2017-08-02	513
23275	2017	developmental biology	2018-08-24	513
8010	2016	genomics	2017-12-08	512
28960	2017	synthetic biology	2018-08-12	512
25951	2016	evolutionary biology	2018-01-18	512
3804	2017	bioinformatics	2018-11-02	512
20795	2016	animal behavior and cognition	2017-09-20	512
29721	2017	systems biology	2018-10-30	512
30025	2015	systems biology	2017-03-21	511
16686	2014	neuroscience	2016-02-04	511
4517	2017	bioinformatics	2018-08-13	511
20849	2017	animal behavior and cognition	2018-07-03	511
8369	2016	genomics	2017-09-11	511
2559	2017	bioinformatics	2018-08-24	511
10340	2016	genetics	2017-11-26	510
1503	2017	microbiology	2018-06-11	510
10137	2017	genetics	2018-06-16	510
14689	2017	neuroscience	2018-07-19	510
3619	2017	bioinformatics	2018-06-05	510
10452	2014	genetics	2016-03-23	510
26058	2016	evolutionary biology	2017-10-23	510
1532	2016	microbiology	2018-04-27	509
5366	2014	bioinformatics	2016-01-28	509
18708	2017	ecology	2018-10-06	508
22537	2017	cell biology	2018-06-05	508
6322	2017	microbiology	2018-09-10	508
15659	2016	neuroscience	2017-12-01	507
9273	2017	genetics	2018-11-02	507
23886	2017	developmental biology	2018-07-12	506
20867	2015	animal behavior and cognition	2016-12-21	506
24102	2014	developmental biology	2015-05-27	506
7575	2016	genomics	2017-09-16	505
20760	2017	animal behavior and cognition	2018-05-30	505
19402	2014	ecology	2015-07-02	505
20889	2016	animal behavior and cognition	2017-11-23	505
677	2017	microbiology	2018-11-13	505
5083	2016	bioinformatics	2017-10-31	505
11870	2017	neuroscience	2018-08-16	505
30175	2017	clinical trials	2018-06-15	504
10134	2017	genetics	2018-06-13	504
19278	2016	ecology	2017-09-20	503
24684	2017	evolutionary biology	2018-09-25	503
7154	2017	genomics	2018-08-01	502
2502	2017	bioinformatics	2018-10-26	502
29398	2016	systems biology	2018-04-09	501
15346	2016	neuroscience	2017-08-14	501
25839	2016	evolutionary biology	2018-04-02	501
7618	2017	genomics	2018-12-04	501
25369	2017	evolutionary biology	2018-05-29	499
10023	2017	genetics	2018-08-16	498
8258	2016	genomics	2017-11-29	498
3531	2016	bioinformatics	2018-03-23	498
29835	2017	systems biology	2018-05-24	497
21817	2016	cancer biology	2017-08-04	497
19212	2016	ecology	2018-01-01	497
16592	2015	neuroscience	2017-01-17	496
26343	2014	evolutionary biology	2015-11-16	496
25846	2015	evolutionary biology	2017-02-09	494
11475	2016	biochemistry	2017-12-18	494
9973	2017	genetics	2018-09-18	494
5280	2016	bioinformatics	2017-07-07	494
4982	2016	bioinformatics	2017-12-22	494
24068	2016	developmental biology	2017-07-21	493
5287	2016	bioinformatics	2017-06-26	493
8131	2016	genomics	2018-02-26	493
1236	2017	microbiology	2018-12-13	493
16363	2016	neuroscience	2017-10-23	492
19157	2015	ecology	2016-12-22	492
23947	2017	developmental biology	2018-08-06	492
26536	2014	evolutionary biology	2016-01-18	492
7602	2016	genomics	2017-10-23	491
4667	2017	bioinformatics	2018-05-24	491
10151	2016	genetics	2017-07-05	491
15290	2017	neuroscience	2018-06-28	490
22554	2017	cell biology	2018-06-21	490
4393	2017	bioinformatics	2018-08-28	490
25546	2016	evolutionary biology	2017-08-23	490
15147	2017	neuroscience	2018-11-23	490
4502	2016	bioinformatics	2018-04-05	489
15482	2017	neuroscience	2018-09-21	489
24482	2017	evolutionary biology	2018-10-05	489
4813	2016	bioinformatics	2018-03-08	489
11675	2017	neuroscience	2018-08-29	488
8836	2013	genomics	2015-04-23	488
26944	2017	molecular biology	2018-12-05	488
25159	2016	evolutionary biology	2018-04-18	488
15126	2016	neuroscience	2017-09-05	487
15012	2017	neuroscience	2018-08-24	487
6439	2017	microbiology	2018-05-30	487
8172	2015	genomics	2017-03-15	487
19079	2017	ecology	2018-07-16	486
15043	2017	neuroscience	2018-12-07	486
5481	2015	bioinformatics	2016-09-04	486
21039	2017	cancer biology	2018-10-29	486
19011	2017	ecology	2018-12-16	486
18986	2017	ecology	2018-08-01	485
30134	2016	paleontology	2017-07-12	484
8612	2015	genomics	2016-11-29	484
27497	2016	molecular biology	2017-05-05	484
10559	2015	genetics	2017-02-09	484
13913	2017	neuroscience	2018-10-18	483
30897	2016	biophysics	2017-05-22	483
1219	2017	microbiology	2018-06-25	483
12927	2017	neuroscience	2018-05-23	483
28700	2016	scientific communication and education	2018-01-31	483
4331	2017	bioinformatics	2018-09-08	482
4812	2016	bioinformatics	2017-12-06	482
30036	2015	systems biology	2016-09-15	482
8085	2016	genomics	2018-03-29	482
10084	2016	genetics	2017-07-07	482
28352	2017	plant biology	2018-07-05	481
13028	2017	neuroscience	2018-07-16	481
11278	2017	biochemistry	2018-11-13	481
16310	2016	neuroscience	2017-11-16	480
21857	2015	cancer biology	2016-11-28	480
7155	2017	genomics	2018-07-17	480
6181	2017	microbiology	2018-10-30	480
7143	2016	genomics	2018-03-02	479
29474	2017	systems biology	2018-09-03	479
2596	2017	bioinformatics	2018-09-27	479
18719	2017	ecology	2018-06-20	477
26588	2014	evolutionary biology	2015-07-24	477
4394	2017	bioinformatics	2018-08-15	477
14326	2017	neuroscience	2018-07-26	477
13816	2016	neuroscience	2018-02-26	476
16665	2015	neuroscience	2016-04-26	476
4571	2016	bioinformatics	2017-09-29	475
9606	2016	genetics	2018-03-21	475
3289	2017	bioinformatics	2018-05-08	475
25368	2017	evolutionary biology	2018-09-17	475
28814	2017	synthetic biology	2018-11-13	475
16664	2015	neuroscience	2016-05-10	474
15387	2017	neuroscience	2018-09-27	474
17048	2017	epidemiology	2018-05-09	474
26556	2014	evolutionary biology	2015-08-11	473
26687	2013	evolutionary biology	2015-04-01	473
6448	2017	microbiology	2018-05-02	472
6206	2016	microbiology	2017-07-24	472
12616	2017	neuroscience	2018-12-03	472
27427	2016	molecular biology	2018-03-04	472
11172	2016	biochemistry	2018-01-15	472
23006	2017	cell biology	2018-06-18	472
29882	2016	systems biology	2018-01-31	472
14299	2016	neuroscience	2018-04-06	471
23047	2016	cell biology	2017-12-11	471
6419	2017	microbiology	2018-05-28	471
25925	2015	evolutionary biology	2016-11-09	471
24984	2016	evolutionary biology	2018-02-13	471
1481	2016	microbiology	2018-03-29	471
20762	2017	animal behavior and cognition	2018-06-07	470
30413	2017	biophysics	2018-12-07	470
26242	2015	evolutionary biology	2017-03-30	470
29489	2017	systems biology	2018-06-07	470
11341	2017	biochemistry	2018-09-06	470
20449	2015	physiology	2016-05-10	470
16471	2015	neuroscience	2016-07-12	469
15572	2017	neuroscience	2018-08-13	468
20471	2017	animal behavior and cognition	2018-11-12	468
4681	2017	bioinformatics	2018-04-16	468
18134	2017	bioengineering	2018-11-28	468
1681	2017	genomics	2018-10-19	468
22813	2017	cell biology	2018-11-07	468
7847	2016	genomics	2017-06-21	468
6536	2016	microbiology	2018-01-31	468
11371	2017	biochemistry	2018-07-23	468
5874	2017	microbiology	2018-08-13	468
5153	2016	bioinformatics	2017-08-23	468
20785	2017	animal behavior and cognition	2018-04-25	467
23980	2016	developmental biology	2017-08-23	467
7128	2017	genomics	2018-06-28	466
4201	2017	bioinformatics	2018-10-09	466
14993	2016	neuroscience	2017-12-14	465
4359	2017	bioinformatics	2018-08-13	465
25281	2017	evolutionary biology	2018-12-17	465
13280	2017	neuroscience	2018-08-03	465
20037	2015	immunology	2016-08-18	465
9890	2017	genetics	2018-04-23	465
19890	2017	immunology	2018-10-31	464
24950	2017	evolutionary biology	2018-06-28	464
8574	2015	genomics	2017-01-06	464
16539	2015	neuroscience	2016-07-08	464
38671	2017	ecology	2018-08-24	464
9790	2017	genetics	2018-11-14	464
11264	2017	biochemistry	2018-09-27	463
16505	2015	neuroscience	2016-11-01	463
19023	2016	ecology	2018-01-15	462
17256	2017	epidemiology	2018-05-30	462
12915	2017	neuroscience	2018-08-08	462
26105	2015	evolutionary biology	2016-06-30	461
28192	2017	plant biology	2018-11-15	461
15485	2017	neuroscience	2018-08-23	461
26154	2016	evolutionary biology	2017-06-21	461
7730	2017	genomics	2018-09-10	461
15520	2017	neuroscience	2018-05-10	461
7633	2016	genomics	2018-01-29	461
29518	2016	systems biology	2018-02-23	461
19307	2016	ecology	2017-06-15	460
3390	2017	bioinformatics	2018-08-30	460
38679	2017	ecology	2018-08-14	460
24963	2017	evolutionary biology	2018-05-31	460
19029	2016	ecology	2017-10-23	460
17285	2017	epidemiology	2018-08-15	460
15933	2017	neuroscience	2018-04-16	460
28263	2016	plant biology	2017-11-06	460
14904	2017	neuroscience	2018-12-04	459
22982	2017	cell biology	2018-07-02	459
16446	2016	neuroscience	2017-04-25	459
10220	2016	genetics	2018-02-15	458
4494	2017	bioinformatics	2018-04-30	458
10025	2017	genetics	2018-07-05	457
28318	2017	plant biology	2018-08-04	457
16627	2014	neuroscience	2015-12-18	456
19424	2014	ecology	2015-04-15	456
13645	2017	neuroscience	2018-10-01	456
8363	2015	genomics	2016-12-01	456
19173	2015	ecology	2016-11-28	456
26484	2015	evolutionary biology	2016-06-02	455
9904	2017	genetics	2018-09-17	455
5449	2015	bioinformatics	2016-12-15	455
24484	2017	evolutionary biology	2018-06-08	455
28220	2017	plant biology	2018-11-21	455
23117	2016	cell biology	2017-12-15	455
22163	2017	cell biology	2018-09-19	455
7577	2017	genomics	2018-11-06	455
16338	2016	neuroscience	2017-10-02	454
15330	2017	neuroscience	2018-09-17	454
25429	2017	evolutionary biology	2018-09-27	454
31118	2015	biophysics	2016-07-05	453
14404	2016	neuroscience	2018-03-12	453
8746	2014	genomics	2015-12-30	453
25753	2015	evolutionary biology	2017-03-22	453
29859	2016	systems biology	2018-02-28	453
30931	2016	biophysics	2017-12-20	453
8631	2014	genomics	2015-11-03	452
1896	2017	genomics	2018-07-07	452
21787	2016	cancer biology	2017-09-22	452
14137	2017	neuroscience	2018-09-24	452
21553	2017	cancer biology	2018-04-02	451
10195	2016	genetics	2018-03-01	451
25816	2016	evolutionary biology	2018-02-26	451
8156	2016	genomics	2017-12-21	450
1944	2017	genomics	2018-09-15	450
28101	2017	plant biology	2018-03-29	450
14987	2017	neuroscience	2018-11-10	450
23069	2016	cell biology	2017-09-27	450
10735	2014	genetics	2015-05-08	450
30866	2017	biophysics	2018-07-11	450
18881	2017	ecology	2018-07-14	449
27420	2016	molecular biology	2017-10-13	449
3832	2017	bioinformatics	2018-06-25	449
29761	2017	systems biology	2018-07-19	449
26047	2015	evolutionary biology	2017-02-07	449
3588	2017	bioinformatics	2018-04-19	449
26287	2014	evolutionary biology	2015-11-14	449
26431	2014	evolutionary biology	2015-07-13	448
29580	2017	systems biology	2018-11-01	448
23119	2016	cell biology	2017-12-06	448
5475	2015	bioinformatics	2016-11-08	448
24067	2015	developmental biology	2017-02-07	448
9434	2017	genetics	2018-06-25	448
18941	2017	ecology	2018-03-30	448
8366	2015	genomics	2016-09-15	448
15223	2017	neuroscience	2018-09-27	447
38773	2016	epidemiology	2017-11-15	447
9635	2016	genetics	2017-10-17	447
22788	2016	cell biology	2018-02-09	447
26019	2016	evolutionary biology	2017-09-25	447
31010	2016	biophysics	2017-12-19	447
25137	2017	evolutionary biology	2018-07-31	446
4372	2017	bioinformatics	2018-06-27	446
23881	2017	developmental biology	2018-09-10	446
19265	2015	ecology	2016-08-30	446
18667	2017	ecology	2018-04-25	446
6402	2016	microbiology	2017-04-27	445
1569	2017	microbiology	2018-08-27	445
27362	2017	molecular biology	2018-06-25	445
7637	2017	genomics	2018-10-02	445
24633	2017	evolutionary biology	2018-10-02	444
10645	2015	genetics	2016-06-15	444
28857	2017	synthetic biology	2018-09-28	444
28273	2017	plant biology	2018-09-10	443
26498	2015	evolutionary biology	2016-05-18	443
18717	2017	ecology	2018-09-13	443
26249	2015	evolutionary biology	2017-02-23	443
20496	2017	animal behavior and cognition	2018-07-26	442
29917	2016	systems biology	2017-10-23	442
15201	2017	neuroscience	2018-09-27	442
20721	2017	animal behavior and cognition	2018-09-18	442
12095	2017	neuroscience	2018-09-06	442
22369	2017	cell biology	2018-09-04	442
29877	2016	systems biology	2018-01-09	442
6205	2017	microbiology	2018-09-11	442
29887	2015	systems biology	2016-12-27	441
4156	2016	bioinformatics	2018-01-19	441
14094	2016	neuroscience	2018-03-09	441
15558	2016	neuroscience	2017-06-07	441
21727	2017	cancer biology	2018-04-20	441
12897	2017	neuroscience	2018-09-06	441
7677	2017	genomics	2018-09-12	441
4109	2017	bioinformatics	2018-08-24	440
11985	2017	neuroscience	2018-08-06	440
15085	2017	neuroscience	2018-10-15	440
16010	2016	neuroscience	2018-02-22	440
17059	2017	epidemiology	2018-07-17	440
15815	2016	neuroscience	2017-09-26	440
14780	2017	neuroscience	2018-12-03	439
21629	2017	cancer biology	2018-09-20	439
9699	2017	genetics	2018-04-09	439
10197	2016	genetics	2017-08-16	439
12914	2017	neuroscience	2018-05-30	439
19937	2017	immunology	2018-08-16	439
4948	2016	bioinformatics	2017-03-27	439
29645	2017	systems biology	2018-07-18	439
12868	2017	neuroscience	2018-10-22	438
6910	2017	genomics	2018-07-03	438
6204	2017	microbiology	2018-03-26	438
14298	2017	neuroscience	2018-05-04	438
13793	2017	neuroscience	2018-07-02	438
25602	2016	evolutionary biology	2017-11-20	438
5213	2015	bioinformatics	2016-07-26	438
24000	2017	developmental biology	2018-03-18	438
28494	2015	plant biology	2017-02-22	437
4354	2017	bioinformatics	2018-07-13	437
7667	2017	genomics	2018-09-13	437
25309	2016	evolutionary biology	2017-09-01	437
8046	2016	genomics	2018-03-01	437
10122	2017	genetics	2018-04-16	437
5523	2014	bioinformatics	2015-07-30	437
14935	2016	neuroscience	2017-09-08	436
27512	2015	molecular biology	2016-05-11	436
5496	2015	bioinformatics	2016-06-23	436
6840	2017	genomics	2018-05-11	435
24838	2017	evolutionary biology	2018-05-17	435
25805	2016	evolutionary biology	2018-02-15	435
14853	2017	neuroscience	2018-11-16	435
5172	2016	bioinformatics	2017-07-11	435
4686	2017	bioinformatics	2018-03-16	434
29654	2017	systems biology	2018-04-10	434
10145	2017	genetics	2018-03-27	434
17300	2017	epidemiology	2018-04-30	434
14968	2017	neuroscience	2018-10-30	434
22974	2017	cell biology	2018-06-11	434
4651	2017	bioinformatics	2018-04-05	434
29679	2017	systems biology	2018-10-03	434
14924	2017	neuroscience	2018-05-29	433
29564	2017	systems biology	2018-11-08	433
25481	2016	evolutionary biology	2017-07-19	433
7732	2017	genomics	2018-08-13	433
7545	2017	genomics	2018-10-22	432
9786	2016	genetics	2017-11-06	432
25493	2017	evolutionary biology	2018-04-30	432
19182	2015	ecology	2016-11-23	432
4320	2017	bioinformatics	2018-07-23	432
26130	2016	evolutionary biology	2017-06-08	432
26571	2014	evolutionary biology	2015-06-12	431
20750	2017	animal behavior and cognition	2018-07-09	431
16093	2016	neuroscience	2018-01-08	431
25826	2016	evolutionary biology	2018-02-02	431
16937	2017	epidemiology	2018-11-20	431
4648	2016	bioinformatics	2017-07-12	431
4209	2017	bioinformatics	2018-08-31	430
23970	2017	developmental biology	2018-04-30	430
8225	2016	genomics	2017-10-18	430
6319	2017	microbiology	2018-06-26	430
14906	2016	neuroscience	2017-11-24	430
14382	2017	neuroscience	2018-05-31	430
29901	2016	systems biology	2017-11-13	430
8157	2016	genomics	2017-04-06	430
5017	2016	bioinformatics	2017-10-03	429
17322	2017	epidemiology	2018-05-31	429
20881	2016	animal behavior and cognition	2017-03-15	429
30630	2016	biophysics	2018-02-22	429
15627	2017	neuroscience	2018-06-12	428
10437	2016	genetics	2017-05-31	428
16191	2016	neuroscience	2017-11-30	428
21777	2016	cancer biology	2017-07-10	428
1160	2017	microbiology	2018-11-16	428
12059	2017	neuroscience	2018-09-27	428
1861	2017	genomics	2018-11-16	428
22942	2017	cell biology	2018-07-05	428
15524	2017	neuroscience	2018-05-23	427
27255	2017	molecular biology	2018-10-23	427
15020	2017	neuroscience	2018-05-07	427
27655	2017	pharmacology and toxicology	2018-11-13	427
25579	2017	evolutionary biology	2018-06-20	426
13215	2017	neuroscience	2018-04-17	426
4409	2017	bioinformatics	2018-06-19	426
19988	2016	immunology	2017-08-17	426
24008	2016	developmental biology	2018-02-05	425
30031	2015	systems biology	2016-04-13	425
29134	2017	systems biology	2018-08-21	425
10187	2016	genetics	2017-08-15	425
26339	2015	evolutionary biology	2016-11-08	425
26003	2015	evolutionary biology	2016-09-30	424
27619	2017	pharmacology and toxicology	2018-06-16	424
12805	2017	neuroscience	2018-10-08	424
6547	2016	microbiology	2017-06-20	424
16155	2016	neuroscience	2017-12-12	424
20755	2017	animal behavior and cognition	2018-09-04	424
2938	2017	bioinformatics	2018-09-27	424
27500	2015	molecular biology	2016-11-29	423
4716	2016	bioinformatics	2018-02-15	423
15377	2017	neuroscience	2018-07-19	423
10329	2016	genetics	2017-09-14	423
20878	2016	animal behavior and cognition	2017-12-04	423
8478	2016	genomics	2017-03-20	423
15144	2017	neuroscience	2018-09-17	423
17995	2017	bioengineering	2018-11-19	423
22782	2017	cell biology	2018-08-16	422
16167	2016	neuroscience	2017-12-06	422
25390	2016	evolutionary biology	2017-10-25	422
1372	2017	microbiology	2018-06-06	422
15421	2016	neuroscience	2017-09-20	422
38672	2017	ecology	2018-04-18	422
16325	2016	neuroscience	2017-06-30	422
17680	2017	zoology	2018-11-28	422
25327	2016	evolutionary biology	2017-12-08	422
8358	2015	genomics	2016-12-21	422
18203	2017	bioengineering	2018-04-18	422
5777	2013	bioinformatics	2015-01-28	422
14925	2017	neuroscience	2018-09-20	422
10557	2015	genetics	2016-12-13	422
7302	2017	genomics	2018-10-25	422
24497	2017	evolutionary biology	2018-06-22	422
6329	2017	microbiology	2018-06-13	422
25448	2017	evolutionary biology	2018-08-20	421
14983	2017	neuroscience	2018-10-15	421
25878	2016	evolutionary biology	2017-12-14	421
23761	2017	developmental biology	2018-11-06	421
27338	2017	molecular biology	2018-07-11	421
15086	2017	neuroscience	2018-09-26	421
5599	2015	bioinformatics	2016-04-30	421
21752	2016	cancer biology	2018-01-22	420
4290	2017	bioinformatics	2018-07-25	420
15637	2017	neuroscience	2018-06-06	420
4484	2017	bioinformatics	2018-05-21	420
17179	2017	epidemiology	2018-04-23	420
15352	2017	neuroscience	2018-06-07	420
4647	2017	bioinformatics	2018-03-23	420
34350	2018	bioengineering	2019-12-04	420
4498	2017	bioinformatics	2018-05-01	420
29685	2017	systems biology	2018-09-12	420
29899	2016	systems biology	2017-11-03	420
29302	2017	systems biology	2018-09-19	420
8587	2015	genomics	2016-06-17	420
1553	2017	microbiology	2018-06-19	419
4237	2016	bioinformatics	2017-07-13	419
8018	2017	genomics	2018-03-06	419
13537	2017	neuroscience	2018-04-05	419
8281	2016	genomics	2017-08-30	419
16353	2016	neuroscience	2017-08-17	419
30798	2017	biophysics	2018-03-12	419
8097	2016	genomics	2018-01-15	419
10894	2017	biochemistry	2018-12-03	419
20843	2016	animal behavior and cognition	2018-02-13	418
3993	2017	bioinformatics	2018-07-31	418
24937	2016	evolutionary biology	2018-02-14	418
24705	2017	evolutionary biology	2018-07-30	418
24207	2017	evolutionary biology	2018-09-01	418
25490	2016	evolutionary biology	2017-10-18	417
3792	2016	bioinformatics	2017-12-19	417
20824	2017	animal behavior and cognition	2018-06-26	417
3800	2017	bioinformatics	2018-07-31	417
15431	2016	neuroscience	2018-02-05	417
17321	2017	epidemiology	2018-05-19	417
4114	2017	bioinformatics	2018-09-14	417
16360	2016	neuroscience	2017-08-10	417
15090	2017	neuroscience	2018-09-21	417
20387	2017	physiology	2018-08-09	416
11508	2016	biochemistry	2017-05-18	416
10439	2016	genetics	2017-05-18	416
5712	2014	bioinformatics	2015-09-03	416
11321	2017	biochemistry	2018-08-02	416
15184	2016	neuroscience	2018-01-12	416
18335	2017	ecology	2018-11-09	416
7892	2017	genomics	2018-05-08	416
16451	2016	neuroscience	2017-06-01	416
22916	2017	cell biology	2018-07-15	416
2000	2017	genomics	2018-05-11	415
6441	2017	microbiology	2018-03-19	415
24713	2017	evolutionary biology	2018-06-22	415
6400	2017	microbiology	2018-04-11	415
15053	2017	neuroscience	2018-09-25	415
12423	2017	neuroscience	2018-08-07	415
11409	2017	biochemistry	2018-04-06	415
30904	2017	biophysics	2018-04-22	415
6318	2017	microbiology	2018-06-11	414
21515	2017	cancer biology	2018-08-07	414
16675	2014	neuroscience	2015-12-29	414
20882	2016	animal behavior and cognition	2017-10-24	414
4075	2017	bioinformatics	2018-04-17	414
9298	2017	genetics	2018-06-23	414
28922	2017	synthetic biology	2018-08-28	414
23442	2017	developmental biology	2018-11-27	413
20157	2016	pathology	2017-10-18	413
27174	2017	molecular biology	2018-05-16	413
2284	2017	bioinformatics	2018-09-25	413
10063	2017	genetics	2018-04-26	413
15547	2017	neuroscience	2018-06-25	413
10379	2016	genetics	2017-07-06	413
29600	2017	systems biology	2018-07-31	413
9841	2017	genetics	2018-08-30	413
25992	2016	evolutionary biology	2017-09-14	413
5437	2015	bioinformatics	2016-11-17	413
28343	2017	plant biology	2018-05-09	412
3643	2017	bioinformatics	2018-10-31	412
29635	2017	systems biology	2018-10-26	412
7442	2017	genomics	2018-11-14	412
14956	2017	neuroscience	2018-07-10	412
19339	2015	ecology	2017-01-19	412
15220	2017	neuroscience	2018-08-23	412
14813	2017	neuroscience	2018-11-01	412
4127	2017	bioinformatics	2018-09-06	412
16183	2016	neuroscience	2017-03-20	411
4410	2016	bioinformatics	2018-02-07	411
7257	2016	genomics	2018-01-16	411
29930	2016	systems biology	2017-03-23	411
25923	2016	evolutionary biology	2017-05-10	411
29648	2017	systems biology	2018-10-09	410
6603	2016	microbiology	2017-08-21	410
19899	2017	immunology	2018-10-09	410
7951	2017	genomics	2018-03-27	410
14562	2017	neuroscience	2018-07-30	410
16129	2016	neuroscience	2017-12-06	410
8627	2014	genomics	2015-12-07	410
17192	2017	epidemiology	2018-10-29	409
8292	2016	genomics	2017-02-17	409
4632	2016	bioinformatics	2017-03-30	409
26512	2014	evolutionary biology	2015-09-11	409
25467	2017	evolutionary biology	2018-04-19	409
22641	2017	cell biology	2018-08-15	409
30922	2017	biophysics	2018-03-16	409
10305	2016	genetics	2017-09-27	409
7925	2017	genomics	2018-03-29	408
25243	2017	evolutionary biology	2018-11-07	408
27316	2017	molecular biology	2018-08-03	408
25400	2017	evolutionary biology	2018-08-27	408
7313	2017	genomics	2018-06-26	408
15367	2017	neuroscience	2018-07-27	408
13467	2017	neuroscience	2018-04-26	408
30760	2017	biophysics	2018-08-27	407
1988	2017	genomics	2018-06-22	407
23773	2017	developmental biology	2018-11-28	407
6613	2016	microbiology	2017-08-01	407
23827	2017	developmental biology	2018-07-11	407
10278	2016	genetics	2017-10-23	407
15078	2017	neuroscience	2018-09-13	407
13873	2017	neuroscience	2018-05-16	407
20798	2017	animal behavior and cognition	2018-08-31	407
24977	2016	evolutionary biology	2018-01-31	406
7686	2017	genomics	2018-08-03	406
26103	2016	evolutionary biology	2017-05-17	406
24619	2017	evolutionary biology	2018-05-07	406
5679	2014	bioinformatics	2015-10-20	406
29889	2015	systems biology	2016-10-14	406
3620	2017	bioinformatics	2018-02-12	406
24529	2017	evolutionary biology	2018-08-20	406
15672	2017	neuroscience	2018-05-16	406
10132	2017	genetics	2018-03-07	406
7971	2017	genomics	2018-03-15	406
7831	2017	genomics	2018-06-01	406
20796	2017	animal behavior and cognition	2018-09-04	406
23022	2016	cell biology	2017-03-13	406
3867	2017	bioinformatics	2018-11-01	405
17560	2017	biophysics	2018-08-08	405
7000	2017	genomics	2018-06-25	405
25347	2016	evolutionary biology	2017-09-15	405
7318	2017	genomics	2018-10-24	405
10173	2016	genetics	2018-01-29	405
7974	2017	genomics	2018-03-13	405
6700	2015	microbiology	2016-07-21	405
28502	2015	plant biology	2016-03-30	404
25991	2015	evolutionary biology	2017-01-17	404
26486	2015	evolutionary biology	2016-04-29	404
7466	2017	genomics	2018-10-16	404
15768	2016	neuroscience	2017-07-31	404
23974	2017	developmental biology	2018-03-29	404
1300	2017	microbiology	2018-08-14	404
11504	2016	biochemistry	2017-05-30	403
21050	2017	cancer biology	2018-10-19	403
7171	2016	genomics	2018-01-12	403
1578	2017	microbiology	2018-07-18	402
14413	2017	neuroscience	2018-04-03	402
23126	2016	cell biology	2017-10-03	402
18132	2017	bioengineering	2018-09-26	402
29471	2017	systems biology	2018-11-16	401
16287	2016	neuroscience	2017-09-15	401
25464	2017	evolutionary biology	2018-07-25	401
28898	2017	synthetic biology	2018-10-24	400
25523	2017	evolutionary biology	2018-06-29	400
14590	2017	neuroscience	2018-11-21	400
7485	2017	genomics	2018-03-28	400
26477	2015	evolutionary biology	2016-05-05	400
30461	2017	biophysics	2018-04-17	400
23763	2017	developmental biology	2018-11-30	400
22109	2017	cell biology	2018-11-28	400
8669	2015	genomics	2016-05-10	400
19366	2015	ecology	2016-10-05	400
12494	2017	neuroscience	2018-10-10	400
26551	2014	evolutionary biology	2016-01-06	399
7779	2017	genomics	2018-06-14	399
591	2017	microbiology	2018-09-10	399
28861	2017	synthetic biology	2018-06-26	399
29824	2016	systems biology	2018-01-25	399
17766	2016	zoology	2017-12-13	399
18218	2016	bioengineering	2017-08-02	399
25509	2016	evolutionary biology	2018-01-17	399
15395	2017	neuroscience	2018-07-11	398
19314	2016	ecology	2017-03-29	398
30080	2014	systems biology	2015-12-29	398
15423	2017	neuroscience	2018-07-03	398
9983	2017	genetics	2018-06-07	398
18214	2016	bioengineering	2017-07-11	398
6214	2016	microbiology	2017-11-14	398
4668	2017	bioinformatics	2018-02-20	398
19330	2015	ecology	2016-06-29	398
3137	2017	bioinformatics	2018-06-27	398
23872	2017	developmental biology	2018-07-30	397
28319	2017	plant biology	2018-06-04	397
13945	2017	neuroscience	2018-07-16	397
17326	2017	epidemiology	2018-03-16	397
25295	2016	evolutionary biology	2017-09-19	397
7797	2017	genomics	2018-06-06	397
8185	2016	genomics	2017-10-11	397
28354	2017	plant biology	2018-04-10	397
16673	2014	neuroscience	2015-12-31	397
7381	2017	genomics	2018-07-03	397
14822	2017	neuroscience	2018-03-05	396
3343	2017	bioinformatics	2018-08-31	396
15668	2017	neuroscience	2018-05-07	396
10169	2016	genetics	2018-01-23	396
25735	2016	evolutionary biology	2017-04-01	396
9969	2017	genetics	2018-05-25	396
17284	2017	epidemiology	2018-06-12	396
4619	2017	bioinformatics	2018-02-26	395
19233	2016	ecology	2017-08-21	395
18668	2017	ecology	2018-10-15	395
25318	2017	evolutionary biology	2018-02-19	395
20814	2016	animal behavior and cognition	2017-11-13	395
14978	2017	neuroscience	2018-09-20	395
7739	2016	genomics	2017-07-28	394
24386	2017	evolutionary biology	2018-11-26	394
25768	2017	evolutionary biology	2018-01-31	394
15898	2017	neuroscience	2018-02-23	394
15398	2017	neuroscience	2018-07-06	394
23967	2017	developmental biology	2018-03-29	394
12224	2017	neuroscience	2018-07-19	394
10419	2015	genetics	2016-11-17	394
30062	2014	systems biology	2015-05-13	394
5464	2015	bioinformatics	2016-09-26	394
20797	2017	animal behavior and cognition	2018-08-20	393
4264	2017	bioinformatics	2018-07-03	393
30054	2015	systems biology	2016-06-17	393
9220	2017	genetics	2018-09-06	393
30861	2017	biophysics	2018-05-24	393
15424	2017	neuroscience	2018-06-28	393
25964	2016	evolutionary biology	2017-09-14	393
13899	2017	neuroscience	2018-01-31	393
14782	2017	neuroscience	2018-06-07	393
28369	2017	plant biology	2018-03-08	393
23100	2016	cell biology	2017-10-27	392
25270	2017	evolutionary biology	2018-10-04	392
15829	2016	neuroscience	2017-11-29	392
15025	2017	neuroscience	2018-09-06	392
9571	2017	genetics	2018-12-04	392
2970	2017	bioinformatics	2018-11-26	392
30778	2017	biophysics	2018-03-21	392
23102	2016	cell biology	2017-10-26	392
22807	2017	cell biology	2018-08-29	392
16652	2015	neuroscience	2016-03-14	392
12273	2017	neuroscience	2018-07-30	392
26615	2014	evolutionary biology	2015-09-08	392
4223	2017	bioinformatics	2018-07-19	392
2257	2017	bioinformatics	2018-12-06	391
29912	2015	systems biology	2016-12-15	391
21393	2017	cancer biology	2018-05-24	391
19030	2017	ecology	2018-08-28	391
23186	2016	cell biology	2017-03-26	391
3681	2017	bioinformatics	2018-12-05	391
9545	2017	genetics	2018-11-08	391
6810	2017	genomics	2018-11-06	391
30138	2014	paleontology	2015-06-30	391
15804	2017	neuroscience	2018-03-12	390
10252	2016	genetics	2017-10-30	390
5933	2017	microbiology	2018-11-28	390
13323	2017	neuroscience	2018-07-23	390
15905	2016	neuroscience	2018-01-16	390
14525	2017	neuroscience	2018-11-20	390
9257	2017	genetics	2018-04-11	390
9975	2017	genetics	2018-06-04	390
2498	2017	bioinformatics	2018-07-03	390
29569	2017	systems biology	2018-05-28	389
5040	2015	bioinformatics	2016-08-08	389
25554	2017	evolutionary biology	2018-05-29	389
5020	2016	bioinformatics	2017-04-12	389
25271	2017	evolutionary biology	2018-07-14	389
26475	2015	evolutionary biology	2016-04-30	389
10018	2017	genetics	2018-02-12	389
4557	2017	bioinformatics	2018-02-26	389
6146	2016	microbiology	2017-10-11	389
3813	2017	bioinformatics	2018-04-11	389
8635	2015	genomics	2016-07-12	389
20846	2017	animal behavior and cognition	2018-03-19	389
8803	2014	genomics	2015-06-18	388
19045	2017	ecology	2018-05-19	388
24001	2016	developmental biology	2017-03-22	388
7887	2017	genomics	2018-04-12	388
22903	2017	cell biology	2018-06-25	388
7159	2017	genomics	2018-04-04	388
8175	2016	genomics	2017-10-11	387
7619	2016	genomics	2017-11-08	387
21212	2017	cancer biology	2018-07-11	387
26562	2014	evolutionary biology	2015-11-14	387
7960	2017	genomics	2018-03-01	387
7858	2017	genomics	2018-02-15	387
29867	2016	systems biology	2017-12-13	387
30636	2017	biophysics	2018-02-03	387
15165	2017	neuroscience	2018-08-01	387
28292	2017	plant biology	2018-06-18	386
5425	2014	bioinformatics	2015-10-24	386
21784	2016	cancer biology	2017-07-29	386
21452	2017	cancer biology	2018-05-18	386
3579	2017	bioinformatics	2018-06-20	386
7842	2017	genomics	2018-05-09	386
23227	2014	cell biology	2015-04-17	386
7816	2017	genomics	2018-04-19	386
4142	2017	bioinformatics	2018-06-13	386
26017	2016	evolutionary biology	2017-07-27	386
17104	2017	epidemiology	2018-03-21	386
14002	2017	neuroscience	2018-06-21	386
13750	2017	neuroscience	2018-02-20	385
23858	2017	developmental biology	2018-02-01	385
6345	2016	microbiology	2017-06-28	385
14514	2017	neuroscience	2018-01-26	385
13027	2017	neuroscience	2018-06-18	385
23899	2017	developmental biology	2018-06-19	385
19018	2017	ecology	2018-07-16	385
14520	2017	neuroscience	2018-11-16	385
15879	2017	neuroscience	2018-02-19	384
23434	2017	developmental biology	2018-08-23	384
15528	2016	neuroscience	2017-06-07	384
18542	2017	ecology	2018-12-10	384
7425	2017	genomics	2018-10-25	384
13490	2017	neuroscience	2018-04-03	384
29879	2016	systems biology	2017-11-07	384
20704	2017	animal behavior and cognition	2018-10-17	384
8639	2014	genomics	2015-09-23	384
3854	2017	bioinformatics	2018-10-17	384
10149	2017	genetics	2018-02-01	384
17699	2017	zoology	2018-10-30	384
4230	2017	bioinformatics	2018-04-19	384
23051	2017	cell biology	2018-01-29	384
15797	2017	neuroscience	2018-03-16	384
20126	2017	pathology	2018-06-15	384
28820	2017	synthetic biology	2018-09-25	383
10279	2016	genetics	2017-09-19	383
11523	2015	biochemistry	2016-12-05	383
15327	2017	neuroscience	2018-07-09	383
25479	2017	evolutionary biology	2018-07-02	383
14820	2017	neuroscience	2018-07-17	383
4456	2017	bioinformatics	2018-04-23	383
11397	2017	biochemistry	2018-03-31	383
3999	2017	bioinformatics	2018-09-14	383
16165	2016	neuroscience	2017-09-04	383
22683	2017	cell biology	2018-11-07	383
25396	2016	evolutionary biology	2017-07-29	382
20303	2017	physiology	2018-07-03	382
13293	2017	neuroscience	2018-07-17	382
24758	2017	evolutionary biology	2018-10-09	382
17180	2017	epidemiology	2018-03-10	382
10160	2017	genetics	2018-01-22	382
23849	2016	developmental biology	2017-09-11	382
8380	2015	genomics	2016-09-30	381
15751	2016	neuroscience	2017-06-29	381
14153	2017	neuroscience	2018-10-15	381
6316	2017	microbiology	2018-05-10	381
5067	2016	bioinformatics	2017-07-15	381
25188	2017	evolutionary biology	2018-11-01	381
4094	2017	bioinformatics	2018-08-13	381
10374	2016	genetics	2017-06-09	381
7660	2017	genomics	2018-07-20	381
9838	2017	genetics	2018-07-30	381
4157	2017	bioinformatics	2018-07-31	381
20382	2017	physiology	2018-07-11	380
4862	2016	bioinformatics	2017-11-01	380
29780	2017	systems biology	2018-04-25	380
7406	2017	genomics	2018-02-08	380
6468	2017	microbiology	2018-01-18	380
17013	2017	epidemiology	2018-06-29	380
13852	2017	neuroscience	2018-04-26	380
26316	2015	evolutionary biology	2016-02-10	380
9587	2017	genetics	2018-03-30	380
25869	2015	evolutionary biology	2016-12-21	379
13928	2017	neuroscience	2018-05-24	379
30683	2017	biophysics	2018-04-12	379
15365	2017	neuroscience	2018-06-28	379
19095	2016	ecology	2017-06-27	379
28688	2017	scientific communication and education	2018-02-11	379
28722	2015	scientific communication and education	2017-01-12	379
11233	2017	biochemistry	2018-09-11	379
21543	2017	cancer biology	2018-10-12	379
22794	2017	cell biology	2018-04-03	379
17319	2017	epidemiology	2018-04-11	379
18387	2017	ecology	2018-08-29	379
21342	2017	cancer biology	2018-05-23	378
15005	2017	neuroscience	2018-08-15	378
9526	2017	genetics	2018-10-12	378
2247	2017	bioinformatics	2018-09-14	378
18362	2017	ecology	2018-08-28	378
5569	2015	bioinformatics	2016-02-29	378
29941	2016	systems biology	2017-06-26	378
21213	2017	cancer biology	2018-11-21	378
15930	2016	neuroscience	2017-09-25	378
13267	2017	neuroscience	2018-05-02	377
5161	2016	bioinformatics	2017-05-18	377
21109	2017	cancer biology	2018-07-02	377
10532	2015	genetics	2016-11-29	377
18867	2017	ecology	2018-11-28	377
3793	2017	bioinformatics	2018-10-30	377
10769	2017	biochemistry	2018-09-05	377
4073	2017	bioinformatics	2018-04-17	377
10300	2015	genetics	2016-09-20	377
26246	2015	evolutionary biology	2016-03-25	377
24069	2016	developmental biology	2017-03-07	377
26809	2017	molecular biology	2018-10-05	377
25414	2017	evolutionary biology	2018-07-18	376
7737	2017	genomics	2018-06-13	376
20896	2015	animal behavior and cognition	2016-06-20	376
9159	2017	genetics	2018-10-29	376
15056	2017	neuroscience	2018-07-30	376
28221	2017	plant biology	2018-07-11	376
23727	2017	developmental biology	2018-12-03	376
17251	2017	epidemiology	2018-01-26	376
10590	2014	genetics	2015-12-07	376
17841	2017	bioengineering	2018-11-07	376
4895	2016	bioinformatics	2017-10-11	376
5361	2015	bioinformatics	2016-12-20	376
7741	2016	genomics	2017-10-11	376
10643	2015	genetics	2016-04-10	376
25871	2016	evolutionary biology	2017-04-11	376
2613	2017	bioinformatics	2018-10-04	375
15551	2017	neuroscience	2018-05-15	375
19222	2015	ecology	2016-11-01	375
9905	2017	genetics	2018-03-12	375
5415	2015	bioinformatics	2016-10-31	375
25996	2015	evolutionary biology	2016-11-08	375
21637	2017	cancer biology	2018-07-09	375
14748	2016	neuroscience	2017-11-27	375
26208	2015	evolutionary biology	2016-05-19	375
3947	2017	bioinformatics	2018-09-17	375
28906	2017	synthetic biology	2018-08-31	375
25338	2017	evolutionary biology	2018-08-20	374
9757	2017	genetics	2018-09-01	374
19979	2017	immunology	2018-02-22	374
6043	2016	microbiology	2017-12-11	374
4268	2016	bioinformatics	2017-10-16	374
5096	2016	bioinformatics	2017-06-23	374
20822	2017	animal behavior and cognition	2018-05-21	374
16202	2016	neuroscience	2017-08-31	374
18217	2017	bioengineering	2018-01-24	374
6355	2017	microbiology	2018-04-02	374
8148	2016	genomics	2017-10-11	374
8069	2016	genomics	2017-06-02	374
10427	2015	genetics	2016-08-04	374
24753	2017	evolutionary biology	2018-07-30	374
14001	2017	neuroscience	2018-03-29	374
7617	2017	genomics	2018-07-30	374
4218	2017	bioinformatics	2018-07-02	373
28666	2016	scientific communication and education	2017-08-22	373
9897	2017	genetics	2018-06-28	373
10059	2017	genetics	2018-03-21	373
28767	2017	synthetic biology	2018-09-13	373
3731	2017	bioinformatics	2018-06-28	373
4523	2016	bioinformatics	2017-12-07	373
19855	2017	immunology	2018-11-14	373
29000	2016	synthetic biology	2017-10-12	373
26356	2015	evolutionary biology	2016-01-15	373
17275	2017	epidemiology	2018-06-01	372
20724	2017	animal behavior and cognition	2018-11-15	372
4241	2017	bioinformatics	2018-06-25	372
14934	2016	neuroscience	2017-11-01	372
10670	2015	genetics	2016-01-26	372
26973	2017	molecular biology	2018-05-15	372
4459	2017	bioinformatics	2018-04-11	372
15793	2016	neuroscience	2017-07-24	372
23121	2016	cell biology	2017-09-19	371
3819	2017	bioinformatics	2018-03-28	371
8523	2015	genomics	2016-12-05	371
25948	2015	evolutionary biology	2016-09-15	371
14250	2017	neuroscience	2018-12-04	371
25007	2017	evolutionary biology	2018-01-27	371
25293	2016	evolutionary biology	2017-10-20	371
7587	2017	genomics	2018-08-09	371
22993	2017	cell biology	2018-03-29	371
13624	2017	neuroscience	2018-06-01	371
5229	2016	bioinformatics	2017-04-06	371
29534	2017	systems biology	2018-06-29	371
10523	2015	genetics	2016-12-05	371
28225	2017	plant biology	2018-08-24	371
3914	2017	bioinformatics	2018-08-17	371
16223	2016	neuroscience	2017-09-20	370
7652	2017	genomics	2018-07-13	370
14763	2017	neuroscience	2018-09-28	370
20535	2017	animal behavior and cognition	2018-09-24	370
27241	2017	molecular biology	2018-04-12	370
13780	2017	neuroscience	2018-02-12	370
24982	2017	evolutionary biology	2018-03-23	370
25402	2017	evolutionary biology	2018-05-10	370
30659	2017	biophysics	2018-04-12	370
2087	2017	genetics	2018-10-02	370
5890	2017	microbiology	2018-11-21	369
15801	2017	neuroscience	2018-02-21	369
24606	2017	evolutionary biology	2018-06-06	369
8814	2014	genomics	2015-04-15	369
25123	2017	evolutionary biology	2018-02-06	369
4809	2016	bioinformatics	2017-11-11	369
8444	2015	genomics	2016-06-11	369
21572	2017	cancer biology	2018-08-13	369
29333	2017	systems biology	2018-06-11	369
16447	2016	neuroscience	2017-04-17	369
29893	2016	systems biology	2017-03-15	369
22700	2017	cell biology	2018-10-17	369
18249	2015	bioengineering	2016-05-08	369
4731	2016	bioinformatics	2017-02-25	369
14656	2017	neuroscience	2018-10-12	368
3599	2017	bioinformatics	2018-11-30	368
4103	2017	bioinformatics	2018-07-28	368
7765	2017	genomics	2018-01-29	368
10119	2016	genetics	2017-03-08	368
20883	2016	animal behavior and cognition	2017-09-05	368
7444	2017	genomics	2018-07-16	368
10607	2014	genetics	2015-09-30	368
16714	2014	neuroscience	2015-02-17	368
20761	2017	animal behavior and cognition	2018-09-17	368
3984	2017	bioinformatics	2018-09-01	367
9779	2017	genetics	2018-08-13	367
29878	2015	systems biology	2016-11-08	367
10093	2017	genetics	2018-02-19	367
7233	2017	genomics	2018-04-23	367
4206	2017	bioinformatics	2018-06-29	367
23748	2017	developmental biology	2018-02-01	367
25898	2016	evolutionary biology	2017-02-23	367
5994	2017	microbiology	2018-10-05	367
25799	2016	evolutionary biology	2017-12-11	367
6012	2016	microbiology	2017-11-10	367
30628	2017	biophysics	2018-10-24	366
5313	2016	bioinformatics	2017-01-27	366
11959	2017	neuroscience	2018-07-29	366
18967	2017	ecology	2018-09-26	366
25300	2017	evolutionary biology	2018-08-31	366
19427	2014	ecology	2015-03-31	366
20236	2017	physiology	2018-10-19	366
4273	2017	bioinformatics	2018-03-22	366
3254	2017	bioinformatics	2018-03-09	365
15650	2017	neuroscience	2018-04-11	365
13654	2017	neuroscience	2018-07-19	365
8081	2016	genomics	2017-12-05	365
16054	2016	neuroscience	2017-11-07	365
21199	2017	cancer biology	2018-12-03	365
22954	2016	cell biology	2017-05-04	365
10680	2014	genetics	2015-11-25	365
27328	2017	molecular biology	2018-05-29	364
25388	2017	evolutionary biology	2018-07-18	364
14706	2017	neuroscience	2018-10-01	364
20669	2017	animal behavior and cognition	2018-11-15	364
4838	2016	bioinformatics	2017-10-24	364
30100	2014	systems biology	2015-04-22	364
6890	2017	genomics	2018-07-12	364
6186	2017	microbiology	2018-07-02	364
29603	2017	systems biology	2018-10-04	364
30114	2017	paleontology	2018-09-26	364
23143	2016	cell biology	2017-07-06	363
10133	2017	genetics	2018-01-23	363
16444	2016	neuroscience	2017-04-17	363
5184	2016	bioinformatics	2017-03-13	363
16342	2016	neuroscience	2017-05-04	363
27707	2016	pharmacology and toxicology	2017-08-08	363
9488	2017	genetics	2018-12-05	363
14403	2016	neuroscience	2017-11-20	363
21578	2017	cancer biology	2018-08-28	363
38716	2017	epidemiology	2018-01-22	363
19044	2017	ecology	2018-04-24	363
22925	2016	cell biology	2017-10-09	362
10090	2017	genetics	2018-02-15	362
14627	2017	neuroscience	2018-10-09	362
19148	2016	ecology	2017-04-03	362
23130	2016	cell biology	2017-08-15	362
5294	2016	bioinformatics	2017-02-14	362
27722	2015	pharmacology and toxicology	2016-06-14	362
7734	2017	genomics	2018-06-01	362
25450	2017	evolutionary biology	2018-06-20	362
25001	2017	evolutionary biology	2018-12-17	361
26251	2015	evolutionary biology	2016-03-30	361
28264	2017	plant biology	2018-06-28	361
26277	2015	evolutionary biology	2016-11-07	361
18977	2017	ecology	2018-01-23	361
20773	2017	animal behavior and cognition	2018-08-27	361
7794	2016	genomics	2017-06-27	361
9468	2017	genetics	2018-12-04	361
3138	2017	bioinformatics	2018-08-10	361
13400	2017	neuroscience	2018-07-10	361
27727	2015	pharmacology and toxicology	2016-04-08	361
693	2017	microbiology	2018-12-01	361
6501	2016	microbiology	2017-11-23	361
19791	2017	immunology	2018-07-11	361
7680	2016	genomics	2017-11-15	361
3807	2017	bioinformatics	2018-10-09	361
26097	2016	evolutionary biology	2017-01-17	361
21724	2017	cancer biology	2018-02-05	361
9950	2017	genetics	2018-05-21	360
26070	2015	evolutionary biology	2016-09-02	360
30616	2017	biophysics	2018-10-18	360
5101	2016	bioinformatics	2017-06-05	360
5099	2016	bioinformatics	2017-06-08	360
1819	2017	genomics	2018-09-10	360
26353	2015	evolutionary biology	2016-04-04	360
9952	2016	genetics	2017-07-26	360
26148	2015	evolutionary biology	2016-12-05	360
10544	2015	genetics	2016-10-31	360
19060	2017	ecology	2018-04-02	360
21635	2017	cancer biology	2018-06-25	360
5242	2015	bioinformatics	2016-07-11	360
7376	2017	genomics	2018-10-17	359
26602	2014	evolutionary biology	2015-08-22	359
13841	2017	neuroscience	2018-11-28	359
8233	2016	genomics	2017-08-03	359
6401	2017	microbiology	2018-02-14	359
14648	2017	neuroscience	2018-10-04	359
29909	2016	systems biology	2017-08-18	359
22442	2017	cell biology	2018-07-02	359
25853	2016	evolutionary biology	2017-01-26	359
22387	2017	cell biology	2018-11-07	359
21686	2017	cancer biology	2018-05-03	359
12558	2017	neuroscience	2018-10-07	359
7962	2016	genomics	2017-06-16	358
15752	2017	neuroscience	2018-03-06	358
7009	2017	genomics	2018-03-15	358
25221	2017	evolutionary biology	2018-09-25	358
4703	2016	bioinformatics	2017-12-19	358
28720	2015	scientific communication and education	2016-06-22	358
29457	2017	systems biology	2018-02-16	358
23145	2016	cell biology	2017-06-21	358
15738	2016	neuroscience	2017-06-05	358
9764	2017	genetics	2018-08-14	358
24011	2016	developmental biology	2017-11-27	358
29383	2017	systems biology	2018-11-09	357
6339	2017	microbiology	2018-03-29	357
17116	2017	epidemiology	2018-11-08	357
15366	2017	neuroscience	2018-06-06	357
4792	2016	bioinformatics	2017-11-07	357
3838	2017	bioinformatics	2018-09-25	357
9955	2017	genetics	2018-05-17	357
25115	2017	evolutionary biology	2018-02-06	357
25778	2016	evolutionary biology	2017-08-02	357
15243	2017	neuroscience	2018-06-26	357
24556	2017	evolutionary biology	2018-10-05	357
25371	2017	evolutionary biology	2018-07-16	357
14284	2017	neuroscience	2018-06-22	357
4565	2017	bioinformatics	2018-02-21	357
24819	2017	evolutionary biology	2018-08-13	357
7782	2017	genomics	2018-05-02	357
25569	2016	evolutionary biology	2017-07-27	357
19189	2016	ecology	2017-09-13	356
14064	2017	neuroscience	2018-10-24	356
7701	2017	genomics	2018-01-02	356
11520	2015	biochemistry	2016-11-22	356
14970	2017	neuroscience	2018-07-18	356
18968	2017	ecology	2018-01-22	356
15468	2017	neuroscience	2018-02-03	356
22923	2017	cell biology	2018-05-09	356
21625	2017	cancer biology	2018-07-03	356
30852	2016	biophysics	2017-10-04	356
17007	2017	epidemiology	2018-09-27	356
10736	2014	genetics	2015-01-26	356
28681	2017	scientific communication and education	2018-02-11	356
29991	2016	systems biology	2017-02-13	356
9544	2017	genetics	2018-05-31	356
8282	2016	genomics	2017-06-28	356
12938	2017	neuroscience	2018-09-26	356
4391	2017	bioinformatics	2018-04-16	355
30976	2016	biophysics	2016-12-30	355
19318	2016	ecology	2017-02-08	355
25258	2017	evolutionary biology	2018-02-21	355
9836	2017	genetics	2018-07-04	355
9781	2017	genetics	2018-08-01	355
9926	2017	genetics	2018-05-28	355
27309	2017	molecular biology	2018-06-19	355
28939	2017	synthetic biology	2018-05-17	355
1223	2017	microbiology	2018-10-23	355
13577	2017	neuroscience	2018-05-30	355
10412	2016	genetics	2017-04-11	355
17263	2016	epidemiology	2017-09-27	355
25721	2017	evolutionary biology	2018-01-27	355
25428	2016	evolutionary biology	2017-07-10	354
15181	2017	neuroscience	2018-07-04	354
18160	2017	bioengineering	2018-06-19	354
7357	2017	genomics	2018-06-19	354
23798	2017	developmental biology	2018-09-10	354
15133	2016	neuroscience	2017-08-25	354
4059	2017	bioinformatics	2018-07-30	354
24082	2015	developmental biology	2016-11-09	354
10318	2016	genetics	2017-01-03	354
4167	2017	bioinformatics	2018-07-02	354
20412	2017	physiology	2018-01-23	354
20697	2017	animal behavior and cognition	2018-04-30	354
17099	2017	epidemiology	2018-08-20	354
14894	2016	neuroscience	2017-09-15	354
4890	2016	bioinformatics	2017-09-05	354
16288	2016	neuroscience	2017-07-26	353
28378	2017	plant biology	2018-01-19	353
19238	2016	ecology	2017-06-29	353
3746	2017	bioinformatics	2018-10-15	353
28860	2017	synthetic biology	2018-07-16	353
9364	2017	genetics	2018-04-23	353
23999	2017	developmental biology	2017-12-23	353
27340	2017	molecular biology	2018-04-27	353
9599	2017	genetics	2018-10-15	353
14247	2017	neuroscience	2018-11-21	353
7738	2017	genomics	2018-05-21	353
29682	2016	systems biology	2017-07-24	353
15339	2017	neuroscience	2018-06-08	353
4198	2017	bioinformatics	2018-06-18	353
15083	2017	neuroscience	2018-07-20	352
20726	2016	animal behavior and cognition	2017-11-20	352
15539	2017	neuroscience	2018-04-26	352
3609	2017	bioinformatics	2018-08-03	352
1209	2017	microbiology	2018-09-28	352
29609	2017	systems biology	2018-09-19	352
6569	2016	microbiology	2017-04-17	352
14603	2017	neuroscience	2018-10-03	352
7681	2017	genomics	2018-04-13	352
11889	2017	neuroscience	2018-08-22	352
26074	2015	evolutionary biology	2016-12-10	352
26688	2013	evolutionary biology	2014-11-05	351
26312	2015	evolutionary biology	2016-08-30	351
14071	2017	neuroscience	2018-11-16	351
16159	2016	neuroscience	2017-09-28	351
6314	2017	microbiology	2018-04-10	351
7583	2017	genomics	2018-06-18	351
26648	2014	evolutionary biology	2015-04-17	351
5627	2015	bioinformatics	2015-12-31	351
8262	2016	genomics	2017-06-29	351
26607	2014	evolutionary biology	2015-08-06	351
14545	2016	neuroscience	2017-11-13	351
29793	2017	systems biology	2018-03-14	351
9959	2016	genetics	2017-09-14	351
22892	2017	cell biology	2018-05-10	351
27998	2017	plant biology	2018-05-25	351
18856	2017	ecology	2018-11-20	351
13965	2017	neuroscience	2018-05-03	351
22678	2017	cell biology	2018-10-11	351
6434	2017	microbiology	2018-01-15	350
19061	2016	ecology	2017-08-21	350
17282	2017	epidemiology	2018-04-30	350
27209	2017	molecular biology	2018-08-01	350
8331	2016	genomics	2017-05-10	350
6369	2017	microbiology	2018-02-27	350
4609	2016	bioinformatics	2017-03-22	350
16214	2015	neuroscience	2016-11-15	350
4998	2015	bioinformatics	2016-09-16	350
25917	2015	evolutionary biology	2016-10-14	350
14985	2017	neuroscience	2018-08-04	350
4361	2017	bioinformatics	2018-04-18	350
8502	2015	genomics	2016-12-08	350
17127	2017	epidemiology	2018-01-22	349
14581	2017	neuroscience	2018-06-04	349
10282	2015	genetics	2016-09-19	349
9939	2017	genetics	2018-05-15	349
3612	2016	bioinformatics	2017-12-08	349
10336	2016	genetics	2017-06-22	349
13938	2017	neuroscience	2018-10-03	349
9610	2017	genetics	2018-10-09	349
14676	2017	neuroscience	2018-07-12	349
21531	2017	cancer biology	2018-09-17	349
13833	2017	neuroscience	2018-11-29	349
18174	2017	bioengineering	2018-05-28	349
18384	2017	ecology	2018-11-19	349
15508	2017	neuroscience	2018-04-23	349
12617	2017	neuroscience	2018-07-19	349
18199	2017	bioengineering	2018-02-19	349
19907	2017	immunology	2018-07-26	349
15786	2017	neuroscience	2018-02-14	349
17248	2017	epidemiology	2018-06-07	349
25994	2016	evolutionary biology	2017-07-10	349
2874	2017	bioinformatics	2018-10-20	349
4629	2017	bioinformatics	2018-01-17	349
6578	2016	microbiology	2017-08-08	349
20670	2017	animal behavior and cognition	2018-07-24	348
8550	2015	genomics	2016-10-18	348
7221	2017	genomics	2018-12-05	348
7982	2017	genomics	2017-12-22	348
4855	2016	bioinformatics	2017-10-03	348
14478	2017	neuroscience	2018-10-15	348
4386	2017	bioinformatics	2018-04-10	348
19252	2016	ecology	2017-06-01	348
3079	2017	bioinformatics	2018-11-08	348
24330	2017	evolutionary biology	2018-08-03	348
21460	2017	cancer biology	2018-11-05	348
4959	2016	bioinformatics	2017-04-11	348
38761	2016	epidemiology	2017-09-28	348
27218	2017	molecular biology	2018-09-22	348
9537	2017	genetics	2018-10-29	347
6238	2017	microbiology	2018-05-22	347
6721	2015	microbiology	2016-09-17	347
29996	2016	systems biology	2017-01-18	347
13131	2017	neuroscience	2018-06-25	347
4417	2017	bioinformatics	2018-03-29	347
17157	2017	epidemiology	2018-03-23	347
7900	2016	genomics	2017-07-18	347
25883	2016	evolutionary biology	2017-09-28	347
21783	2015	cancer biology	2016-10-11	347
24638	2017	evolutionary biology	2018-07-02	347
22353	2017	cell biology	2018-06-22	347
29763	2016	systems biology	2017-09-24	347
28513	2015	plant biology	2016-07-02	346
3736	2017	bioinformatics	2018-10-11	346
8759	2014	genomics	2015-08-28	346
9834	2017	genetics	2018-03-25	346
26125	2015	evolutionary biology	2016-07-29	346
26020	2016	evolutionary biology	2017-03-02	346
38604	2017	ecology	2018-06-26	346
10281	2016	genetics	2017-07-06	346
22972	2017	cell biology	2018-03-16	346
16286	2016	neuroscience	2016-12-30	346
19328	2015	ecology	2016-03-07	346
24884	2017	evolutionary biology	2018-04-02	346
5136	2016	bioinformatics	2017-05-02	346
8828	2014	genomics	2015-02-02	346
25712	2016	evolutionary biology	2017-05-02	346
26015	2016	evolutionary biology	2017-06-17	346
5243	2015	bioinformatics	2016-05-11	345
15177	2017	neuroscience	2018-06-26	345
5758	2014	bioinformatics	2015-01-22	345
5176	2016	bioinformatics	2017-04-08	345
14346	2017	neuroscience	2018-10-30	345
22758	2016	cell biology	2017-09-22	345
19319	2016	ecology	2017-01-22	345
5441	2015	bioinformatics	2016-06-09	345
14088	2017	neuroscience	2018-12-01	345
22772	2017	cell biology	2018-08-08	345
4693	2016	bioinformatics	2017-03-17	345
12556	2017	neuroscience	2018-09-14	345
16280	2016	neuroscience	2017-07-26	345
38687	2017	epidemiology	2018-02-25	345
25792	2016	evolutionary biology	2017-11-23	345
38601	2017	ecology	2018-06-26	344
29714	2016	systems biology	2017-10-17	344
11356	2017	biochemistry	2018-04-10	344
25343	2017	evolutionary biology	2018-04-18	344
19063	2017	ecology	2018-03-16	344
14098	2017	neuroscience	2018-11-29	344
19950	2016	immunology	2017-06-21	344
5353	2015	bioinformatics	2016-11-25	344
26575	2014	evolutionary biology	2015-10-07	344
15345	2017	neuroscience	2018-05-29	344
19883	2017	immunology	2018-09-04	344
25933	2016	evolutionary biology	2017-08-14	344
30850	2017	biophysics	2018-02-13	344
14373	2017	neuroscience	2018-10-25	344
26458	2014	evolutionary biology	2015-09-08	343
15655	2016	neuroscience	2017-05-17	343
1567	2017	microbiology	2018-11-21	343
25084	2017	evolutionary biology	2018-11-01	343
13401	2017	neuroscience	2018-03-29	343
5249	2016	bioinformatics	2017-02-24	343
5320	2016	bioinformatics	2016-12-27	343
3940	2017	bioinformatics	2018-08-17	343
18975	2017	ecology	2018-01-12	343
22776	2017	cell biology	2018-08-03	343
23056	2016	cell biology	2017-12-08	343
20793	2016	animal behavior and cognition	2017-08-09	343
18186	2017	bioengineering	2018-04-06	343
7421	2017	genomics	2018-08-27	343
30033	2015	systems biology	2016-08-18	343
27887	2017	plant biology	2018-10-05	343
25685	2016	evolutionary biology	2017-10-04	343
21664	2017	cancer biology	2018-05-21	343
16062	2016	neuroscience	2017-10-19	343
11763	2017	neuroscience	2018-11-12	343
7890	2016	genomics	2017-04-13	343
1368	2017	microbiology	2018-09-10	343
20820	2017	animal behavior and cognition	2018-04-25	343
20386	2017	physiology	2018-05-30	343
29614	2016	systems biology	2017-09-27	342
13932	2017	neuroscience	2018-03-27	342
2367	2017	bioinformatics	2018-11-26	342
27334	2017	molecular biology	2018-04-26	342
6493	2016	microbiology	2017-04-27	342
14817	2017	neuroscience	2018-08-22	342
26637	2014	evolutionary biology	2015-05-11	342
16832	2017	epidemiology	2018-09-13	342
18496	2017	ecology	2018-10-18	342
3748	2017	bioinformatics	2018-10-04	342
28377	2016	plant biology	2017-05-01	342
7494	2017	genomics	2018-08-09	342
10699	2014	genetics	2015-08-26	342
8040	2016	genomics	2017-11-29	342
21607	2016	cancer biology	2017-08-29	342
3306	2017	bioinformatics	2018-10-25	342
25835	2016	evolutionary biology	2017-10-30	342
6566	2016	microbiology	2017-08-09	341
10463	2015	genetics	2016-11-09	341
15483	2017	neuroscience	2018-04-26	341
20816	2017	animal behavior and cognition	2018-05-18	341
11462	2016	biochemistry	2017-08-21	341
15496	2017	neuroscience	2018-04-24	341
6090	2017	microbiology	2018-07-24	341
10444	2016	genetics	2017-02-28	341
25829	2016	evolutionary biology	2017-02-25	341
15566	2017	neuroscience	2018-04-09	341
15618	2017	neuroscience	2018-03-26	341
21536	2017	cancer biology	2018-09-06	341
14632	2017	neuroscience	2018-09-17	341
19088	2017	ecology	2018-02-08	341
29768	2017	systems biology	2018-03-26	341
16609	2014	neuroscience	2015-11-18	341
8690	2015	genomics	2016-01-18	341
12878	2017	neuroscience	2018-06-25	341
27367	2017	molecular biology	2018-02-28	340
21514	2017	cancer biology	2018-02-21	340
17183	2017	epidemiology	2018-07-06	340
6671	2016	microbiology	2017-02-28	340
9371	2017	genetics	2018-10-22	340
26686	2013	evolutionary biology	2014-11-18	340
19080	2017	ecology	2018-02-20	340
38734	2016	epidemiology	2017-12-06	340
22996	2017	cell biology	2018-02-06	340
7906	2017	genomics	2018-02-13	340
8361	2016	genomics	2017-04-11	340
25767	2016	evolutionary biology	2017-05-06	340
21519	2017	cancer biology	2018-09-11	340
5512	2015	bioinformatics	2016-06-01	340
12846	2017	evolutionary biology	2018-10-25	340
26093	2016	evolutionary biology	2017-04-10	340
30106	2014	systems biology	2015-01-27	340
4243	2017	bioinformatics	2018-05-22	340
12954	2017	neuroscience	2018-05-10	339
25750	2017	evolutionary biology	2017-12-18	339
16701	2014	neuroscience	2015-05-05	339
8028	2017	genomics	2017-12-11	339
20861	2016	animal behavior and cognition	2017-09-29	339
15017	2017	neuroscience	2018-07-18	339
15166	2017	neuroscience	2018-05-18	339
8095	2016	genomics	2016-12-26	339
21716	2017	cancer biology	2018-02-13	339
3201	2017	bioinformatics	2018-10-23	339
25706	2017	evolutionary biology	2018-01-15	339
8243	2015	genomics	2016-10-18	339
5100	2016	bioinformatics	2016-12-31	339
19734	2017	immunology	2018-10-11	339
4804	2016	bioinformatics	2017-10-13	339
24297	2017	evolutionary biology	2018-11-12	339
22834	2017	cell biology	2018-06-15	338
9930	2017	genetics	2018-01-10	338
16210	2016	neuroscience	2017-08-25	338
10689	2013	genetics	2014-10-16	338
25355	2017	evolutionary biology	2018-07-05	338
30864	2017	biophysics	2018-03-27	338
2747	2017	bioinformatics	2018-07-03	338
14861	2016	neuroscience	2017-10-11	338
8008	2017	genomics	2017-12-21	338
25830	2016	evolutionary biology	2017-10-31	338
13273	2017	neuroscience	2018-09-28	338
8203	2016	genomics	2017-06-22	338
5307	2016	bioinformatics	2017-01-06	338
26111	2016	evolutionary biology	2017-03-24	338
5108	2016	bioinformatics	2017-05-11	338
9698	2017	genetics	2018-04-12	338
15172	2017	neuroscience	2018-06-14	338
4020	2017	bioinformatics	2018-07-24	338
2924	2017	bioinformatics	2018-05-26	338
14341	2017	neuroscience	2018-10-23	337
7849	2016	genomics	2017-05-31	337
30422	2017	biophysics	2018-03-13	337
29611	2017	systems biology	2018-08-03	337
16578	2015	neuroscience	2016-06-07	337
4434	2017	bioinformatics	2018-03-14	337
20601	2017	animal behavior and cognition	2018-11-02	337
29255	2017	systems biology	2018-07-31	337
6104	2017	microbiology	2018-07-17	337
27683	2016	pharmacology and toxicology	2017-10-24	337
20707	2017	animal behavior and cognition	2018-11-14	337
4671	2017	bioinformatics	2017-12-21	337
6667	2016	microbiology	2017-03-08	337
15351	2017	neuroscience	2018-05-21	337
29796	2017	systems biology	2018-02-24	337
7899	2017	genomics	2018-02-15	337
14483	2017	neuroscience	2018-10-04	337
6000	2017	microbiology	2018-02-01	337
11913	2017	neuroscience	2018-10-22	337
30107	2013	systems biology	2014-10-23	337
8098	2016	genomics	2017-10-23	336
17770	2016	zoology	2017-08-21	336
24381	2017	evolutionary biology	2018-08-14	336
4917	2016	bioinformatics	2017-08-21	336
14787	2017	neuroscience	2018-08-22	336
8476	2016	genomics	2016-12-30	336
7428	2017	genomics	2018-03-15	336
9428	2017	genetics	2018-08-20	336
22870	2017	cell biology	2018-05-25	336
15307	2017	neuroscience	2018-05-23	336
27686	2017	pharmacology and toxicology	2018-03-28	336
5681	2014	bioinformatics	2015-03-01	336
25545	2017	evolutionary biology	2018-04-13	336
4270	2017	bioinformatics	2018-03-26	336
26532	2015	evolutionary biology	2015-12-15	336
5265	2016	bioinformatics	2017-02-08	336
26085	2015	evolutionary biology	2016-06-27	336
21890	2013	cancer biology	2014-10-09	336
8796	2014	genomics	2015-05-13	336
9701	2017	genetics	2018-08-16	335
21675	2017	cancer biology	2018-04-30	335
14152	2017	neuroscience	2018-11-13	335
9425	2017	genetics	2018-03-08	335
19094	2017	ecology	2018-01-24	335
22573	2017	cell biology	2018-02-15	335
23896	2017	developmental biology	2018-05-03	335
30255	2017	biophysics	2018-09-18	335
22864	2017	cell biology	2018-05-27	335
25203	2017	evolutionary biology	2018-09-10	335
15274	2017	neuroscience	2018-01-19	335
15851	2017	neuroscience	2018-01-08	334
3743	2017	bioinformatics	2018-01-05	334
23928	2017	developmental biology	2018-03-28	334
13797	2017	neuroscience	2018-10-13	334
4170	2017	bioinformatics	2018-06-11	334
27520	2014	molecular biology	2015-10-13	334
26386	2015	evolutionary biology	2016-06-22	334
16538	2016	neuroscience	2016-12-05	334
3063	2017	bioinformatics	2018-07-18	334
6490	2016	microbiology	2017-11-08	334
11219	2017	biochemistry	2018-08-13	334
3755	2017	bioinformatics	2018-09-25	334
3789	2017	bioinformatics	2018-09-12	334
9680	2017	genetics	2018-08-22	334
30118	2017	paleontology	2018-11-27	334
1583	2017	microbiology	2018-11-05	334
4912	2016	bioinformatics	2017-08-21	334
30091	2014	systems biology	2015-06-17	334
16712	2014	neuroscience	2015-01-21	334
13798	2017	neuroscience	2018-07-17	334
9592	2017	genetics	2018-01-09	334
30723	2017	biophysics	2018-07-10	333
18286	2017	ecology	2018-10-16	333
18251	2016	bioengineering	2016-12-23	333
25014	2017	evolutionary biology	2018-05-11	333
6445	2017	microbiology	2017-12-22	333
6968	2017	genomics	2018-07-15	333
22550	2017	cell biology	2018-07-17	333
9450	2017	genetics	2018-11-20	333
3562	2017	bioinformatics	2018-11-06	333
24073	2016	developmental biology	2017-01-10	333
7165	2017	genomics	2018-09-19	333
15032	2016	neuroscience	2017-09-25	333
15412	2017	neuroscience	2018-05-04	333
24780	2017	evolutionary biology	2018-06-06	333
3482	2017	bioinformatics	2018-11-10	332
9475	2017	genetics	2018-02-15	332
7882	2016	genomics	2017-05-08	332
13927	2017	neuroscience	2018-06-14	332
29186	2018	systems biology	2018-12-15	332
4395	2016	bioinformatics	2017-06-23	332
38736	2017	ecology	2017-12-02	332
22533	2017	cell biology	2018-07-09	332
23932	2016	developmental biology	2017-09-11	332
15799	2016	neuroscience	2017-10-05	332
20465	2017	animal behavior and cognition	2018-11-15	332
21663	2017	cancer biology	2018-05-10	332
21472	2017	cancer biology	2018-10-10	331
15675	2017	neuroscience	2018-03-01	331
15204	2017	neuroscience	2018-06-07	331
12717	2017	neuroscience	2018-11-21	331
22500	2017	cell biology	2018-04-27	331
29574	2017	systems biology	2018-02-21	331
26392	2015	evolutionary biology	2016-06-17	331
17324	2016	epidemiology	2017-05-04	331
38587	2017	ecology	2018-06-17	331
10042	2017	genetics	2018-02-15	331
30001	2016	systems biology	2016-12-06	331
7163	2017	genomics	2018-07-11	330
14376	2017	neuroscience	2018-10-10	330
6367	2016	microbiology	2017-04-12	330
27499	2015	molecular biology	2016-09-29	330
23811	2017	developmental biology	2018-08-02	330
15523	2016	neuroscience	2017-06-02	330
28134	2017	plant biology	2018-10-04	330
38650	2016	ecology	2017-08-30	330
1566	2017	microbiology	2018-11-09	330
4442	2017	bioinformatics	2018-03-06	330
14225	2017	neuroscience	2018-10-31	330
8261	2016	genomics	2016-12-01	330
5248	2016	bioinformatics	2017-02-11	330
30958	2016	biophysics	2017-11-07	330
29938	2016	systems biology	2017-05-16	330
6698	2015	microbiology	2016-11-14	330
19449	2014	ecology	2015-02-23	330
3389	2017	bioinformatics	2018-11-13	330
19357	2015	ecology	2016-09-02	330
15372	2016	neuroscience	2017-07-17	329
15084	2017	neuroscience	2018-06-27	329
12722	2017	neuroscience	2018-10-22	329
8517	2015	genomics	2016-11-03	329
29736	2017	systems biology	2018-04-19	329
7798	2017	genomics	2018-01-04	329
28180	2017	plant biology	2018-01-30	329
29613	2017	systems biology	2017-12-21	329
23128	2016	cell biology	2017-07-18	329
4186	2017	bioinformatics	2018-06-01	329
10185	2016	genetics	2017-11-02	329
16207	2016	neuroscience	2017-04-27	329
15227	2017	neuroscience	2018-05-31	329
4011	2017	bioinformatics	2018-07-13	329
3981	2017	bioinformatics	2018-04-18	329
14214	2017	neuroscience	2018-10-31	329
13874	2017	neuroscience	2018-08-09	329
16719	2013	neuroscience	2014-11-24	328
27337	2017	molecular biology	2018-04-09	328
8655	2014	genomics	2015-07-17	328
7296	2017	genomics	2018-10-16	328
4018	2017	bioinformatics	2018-02-09	328
21827	2016	cancer biology	2017-01-12	328
3627	2017	bioinformatics	2018-02-14	328
9306	2017	genetics	2018-07-23	328
17981	2017	bioengineering	2018-09-05	328
21269	2017	cancer biology	2018-10-24	328
26835	2017	molecular biology	2018-07-05	328
1194	2017	microbiology	2018-05-02	328
14617	2017	neuroscience	2018-09-07	328
16028	2016	neuroscience	2017-03-07	328
1478	2017	microbiology	2018-06-19	328
6898	2017	genomics	2018-07-10	328
6303	2016	microbiology	2017-07-10	328
24607	2017	evolutionary biology	2018-11-20	327
9555	2017	genetics	2018-10-05	327
19099	2017	ecology	2018-01-10	327
20859	2017	animal behavior and cognition	2017-12-04	327
7596	2016	genomics	2017-09-20	327
12941	2018	neuroscience	2018-11-27	327
10027	2016	genetics	2017-09-11	327
8716	2014	genomics	2015-11-11	327
18627	2017	ecology	2018-06-07	327
9910	2017	genetics	2018-05-07	327
3949	2017	bioinformatics	2018-07-31	327
27129	2018	molecular biology	2018-12-05	327
8132	2016	genomics	2017-09-12	327
15982	2016	neuroscience	2017-03-08	327
3031	2017	bioinformatics	2018-08-09	327
4556	2017	bioinformatics	2017-12-04	326
5636	2014	bioinformatics	2015-04-28	326
17223	2017	epidemiology	2018-06-26	326
26670	2014	evolutionary biology	2015-01-12	326
14121	2017	neuroscience	2018-11-07	326
4360	2017	bioinformatics	2018-03-27	326
29588	2017	systems biology	2018-09-17	326
15736	2017	neuroscience	2018-02-06	326
20857	2017	animal behavior and cognition	2017-12-04	326
13964	2017	neuroscience	2018-05-15	326
11488	2016	biochemistry	2017-05-11	326
14930	2017	neuroscience	2017-11-24	325
27442	2016	molecular biology	2017-08-11	325
29640	2017	systems biology	2018-07-26	325
28852	2018	synthetic biology	2018-12-06	325
29802	2017	systems biology	2018-01-29	325
3845	2017	bioinformatics	2018-08-23	325
9853	2016	genetics	2017-10-30	325
14834	2017	neuroscience	2018-08-03	325
15188	2017	neuroscience	2018-06-04	325
13520	2017	neuroscience	2018-08-30	325
5345	2015	bioinformatics	2015-12-10	325
10324	2016	genetics	2017-06-13	325
7647	2017	genomics	2018-05-31	325
28427	2016	plant biology	2016-12-22	325
16498	2016	neuroscience	2017-01-18	325
21341	2017	cancer biology	2018-10-26	324
3811	2017	bioinformatics	2018-09-01	324
17237	2017	epidemiology	2018-04-12	324
1155	2017	microbiology	2018-08-24	324
11388	2017	biochemistry	2018-02-09	324
5177	2016	bioinformatics	2016-11-30	324
26804	2017	molecular biology	2018-11-08	324
24811	2017	evolutionary biology	2018-03-20	324
4274	2016	bioinformatics	2017-09-06	324
29360	2017	systems biology	2018-08-22	324
21731	2017	cancer biology	2017-12-02	324
29612	2017	systems biology	2018-05-02	324
9920	2016	genetics	2017-09-27	324
25220	2017	evolutionary biology	2018-08-23	324
26040	2016	evolutionary biology	2017-05-04	324
12139	2017	neuroscience	2018-09-27	323
11529	2015	biochemistry	2016-06-02	323
10193	2016	genetics	2017-03-23	323
4873	2016	bioinformatics	2017-08-30	323
23741	2017	developmental biology	2018-09-28	323
16472	2016	neuroscience	2017-02-08	323
4148	2017	bioinformatics	2018-01-10	323
16193	2016	neuroscience	2017-08-16	323
6262	2017	microbiology	2018-04-12	323
3592	2017	bioinformatics	2017-12-18	323
28414	2016	plant biology	2017-01-18	323
22316	2017	cell biology	2018-07-25	323
6541	2016	microbiology	2017-08-29	323
19908	2017	immunology	2018-06-28	323
30946	2016	biophysics	2017-11-09	323
4166	2017	bioinformatics	2018-06-01	323
7724	2016	genomics	2017-10-24	323
10631	2015	genetics	2016-03-18	323
16478	2016	neuroscience	2017-02-01	322
7217	2017	genomics	2018-11-09	322
27668	2017	pharmacology and toxicology	2018-04-03	322
16097	2016	neuroscience	2017-09-21	322
12557	2017	neuroscience	2018-04-17	322
22357	2017	cell biology	2018-08-23	322
7572	2017	genomics	2018-06-28	322
1323	2017	microbiology	2018-04-18	322
27369	2017	molecular biology	2017-12-26	322
7806	2016	genomics	2017-11-15	322
16687	2014	neuroscience	2015-07-28	322
3589	2017	bioinformatics	2018-10-18	322
5305	2015	bioinformatics	2016-02-11	322
10092	2017	genetics	2018-01-05	322
1741	2017	genomics	2018-10-31	322
25636	2016	evolutionary biology	2017-04-28	322
28991	2016	synthetic biology	2017-10-09	322
7065	2018	genomics	2018-11-21	322
38807	2016	genomics	2017-02-20	322
20414	2017	physiology	2017-11-23	322
8403	2016	genomics	2017-02-20	322
18110	2017	bioengineering	2018-08-20	322
8027	2017	genomics	2017-11-24	322
19070	2017	ecology	2018-02-12	321
15442	2017	neuroscience	2018-04-13	321
19086	2017	ecology	2018-01-18	321
22727	2017	cell biology	2018-08-14	321
6357	2017	microbiology	2018-02-06	321
6350	2016	microbiology	2017-10-01	321
7486	2017	genomics	2018-06-19	321
15990	2016	neuroscience	2017-06-08	321
8322	2015	genomics	2016-08-10	321
27803	2017	plant biology	2018-08-27	321
9104	2017	genetics	2018-09-03	321
23960	2017	developmental biology	2018-01-23	321
16117	2016	neuroscience	2017-09-11	321
7731	2017	genomics	2018-04-23	321
3152	2017	bioinformatics	2018-03-06	321
19822	2017	immunology	2018-09-05	321
18936	2017	ecology	2017-12-20	321
7936	2017	genomics	2018-01-08	321
[truncated: 13,767 more rows]
