# Supplementary material for: Tracking the popularity and outcomes of all bioRxiv preprints
Source: eLife journal article supplement (doi:10.7554/elife.45133), 2019-04-24
Supplement: supp [file elife-45133-supp-v1.zip › elife_poa_e45133_Figure_6_source_data_2.csv]

id	journal	interval
2967	peerj	1312
8845	nucleic acids research	1113
16624	journal of neuroscience	1051
18517	peerj	1045
24519	scientific reports	936
5645	plos computational biology	903
30051	scientific reports	866
4921	gigascience	836
14653	nature communications	825
5282	bmc bioinformatics	823
4639	bmc bioinformatics	817
13630	plos computational biology	814
8299	genetics	810
18791	molecular ecology	805
26272	molecular biology and evolution	805
7969	scientific reports	798
25337	peerj	791
6869	genome biology	783
5323	bioinformatics	773
19406	pnas	770
24873	plos genetics	755
30027	scientific reports	747
9237	nature communications	747
24129	scientific reports	744
25092	genome biology and evolution	719
7874	plos computational biology	708
13801	plos computational biology	702
5561	bmc genomics	699
26495	plos genetics	687
27480	genome biology	685
10621	nature genetics	684
1758	g3: genes|genomes|genetics	682
5677	bmc genomics	673
26149	molecular ecology	668
4408	nucleic acids research	667
5767	nucleic acids research	665
8449	g3: genes|genomes|genetics	659
8495	nature communications	657
28474	gigascience	656
20451	plos one	654
26352	genome biology and evolution	651
16524	elife	648
15510	plos computational biology	644
27458	plos one	644
29012	pnas	643
7718	genome biology	643
26305	scientific reports	641
23856	elife	640
4763	nucleic acids research	638
25238	molecular ecology	637
1782	genome biology	636
7495	nature genetics	635
7369	scientific reports	633
8700	plos genetics	629
8521	scientific reports	629
8588	nature methods	629
24110	plos one	627
15014	plos computational biology	626
8235	nature genetics	626
26531	pnas	625
6714	bmc genomics	625
8386	genome biology	624
24903	molecular biology and evolution	623
5254	plos computational biology	621
7733	nucleic acids research	618
4960	nature methods	618
8244	nature genetics	615
1948	genetics	613
19168	pnas	611
13907	neuroimage	604
21800	bioinformatics	603
17049	plos computational biology	603
4187	bmc bioinformatics	602
16656	scientific reports	601
14806	plos computational biology	600
2987	plos one	599
3781	bioinformatics	597
10106	genetics	595
16292	elife	593
16213	neuroimage	592
7952	g3: genes|genomes|genetics	590
25601	plos one	589
5139	nucleic acids research	588
15478	plos computational biology	588
7074	nature genetics	584
4569	genome biology	584
18421	plos one	582
24017	cell reports	582
26036	scientific reports	582
13579	scientific reports	582
8578	plos computational biology	581
16488	neuroimage	581
21747	scientific reports	578
7043	genome biology	578
5616	bioinformatics	577
7429	nature communications	577
25801	molecular biology and evolution	577
9972	molecular biology and evolution	576
8180	scientific reports	576
7593	nucleic acids research	573
6440	scientific reports	572
18747	peerj	571
29862	scientific reports	571
3298	genome biology	570
16534	scientific reports	570
15415	nature communications	567
8191	bmc genomics	567
11746	scientific reports	567
21313	plos genetics	566
8232	nature genetics	566
29871	bmc genomics	564
7965	g3: genes|genomes|genetics	564
21588	genome biology	563
23065	nature communications	563
28457	pnas	562
23724	plos biology	560
29804	plos computational biology	560
11378	elife	557
5726	plos one	556
21640	nature genetics	556
21745	nature communications	555
8251	plos genetics	553
8420	scientific reports	553
3069	plos genetics	553
24898	genome biology and evolution	553
23182	molecular biology of the cell	553
5773	bioinformatics	552
3089	nature communications	549
26492	peerj	547
15507	plos one	547
17001	plos biology	547
16628	plos computational biology	547
5776	plos one	546
21722	peerj	546
4931	scientific reports	543
17772	scientific reports	543
3591	g3: genes|genomes|genetics	542
14556	nature communications	542
19077	scientific reports	542
5011	bmc bioinformatics	540
5644	plos computational biology	540
14300	plos biology	539
10325	plos one	539
5333	bioinformatics	535
10577	scientific reports	534
2606	genetics	531
4604	scientific reports	531
7871	nature genetics	531
8075	nature genetics	530
1929	bmc bioinformatics	530
7099	bmc genomics	529
19768	nature communications	527
30077	plos one	527
4962	nature communications	526
25928	plos one	524
3615	genome biology and evolution	524
7789	genome biology	524
20871	peerj	524
8231	nature communications	523
26190	bmc genomics	522
29677	plos one	522
21738	nature genetics	522
10110	plos one	521
8228	nature methods	521
4559	nucleic acids research	521
15969	journal of neuroscience	519
30044	nucleic acids research	518
24044	development	517
38634	molecular ecology	517
30037	cell reports	517
2730	pnas	517
9120	nature communications	516
3011	nature communications	516
23378	nature communications	514
12394	plos computational biology	514
25837	molecular ecology	514
23275	genome research	513
20029	plos computational biology	513
25591	g3: genes|genomes|genetics	513
29585	plos computational biology	513
25951	molecular biology and evolution	512
29721	nature communications	512
2559	genome biology	511
10452	genetics	510
5366	cell reports	509
22537	nucleic acids research	508
15659	scientific reports	507
9273	g3: genes|genomes|genetics	507
23886	development	506
5083	nature methods	505
11870	scientific reports	505
677	mbio	505
24684	genome biology and evolution	503
2502	bioinformatics	502
7154	pnas	502
15346	neuroimage	501
7618	scientific reports	501
25369	pnas	499
3531	genome biology	498
10023	plos one	498
8258	genetics	498
21817	scientific reports	497
26343	plos genetics	496
11475	nature methods	494
5280	plos one	494
9973	mbio	494
1236	nature communications	493
5287	gigascience	493
8131	nature genetics	493
26536	molecular ecology	492
19157	peerj	492
16363	plos computational biology	492
7602	nature communications	491
10151	genetics	491
15147	elife	490
24482	molecular ecology	489
8836	genetics	488
26944	genome biology	488
8172	bioinformatics	487
15126	cell reports	487
15012	plos computational biology	487
5481	bioinformatics	486
21039	nature genetics	486
10559	plos computational biology	484
30897	plos computational biology	483
4331	bioinformatics	482
4812	bmc bioinformatics	482
11278	pnas	481
13028	journal of neuroscience	481
7155	plos one	480
7143	genome research	479
16665	scientific reports	476
15387	scientific reports	474
26687	plos one	473
11172	molecular biology of the cell	472
29882	nucleic acids research	472
23047	nature communications	471
30413	elife	470
20762	plos one	470
16471	neuroimage	469
18134	nature communications	468
1681	nature communications	468
5153	gigascience	468
4681	plos computational biology	468
20785	genome biology	467
23980	development	467
4201	nature communications	466
4359	bmc genomics	465
14993	plos computational biology	465
25281	molecular ecology	465
13280	elife	465
9890	plos one	465
9790	nature communications	464
8574	bmc genomics	464
19890	plos one	464
16505	plos computational biology	463
29518	plos computational biology	461
26154	scientific reports	461
15485	neuroimage	461
7730	scientific reports	461
26105	molecular ecology	461
3390	gigascience	460
24963	scientific reports	460
17285	nature communications	460
16446	plos one	459
8363	plos one	456
16627	neuroimage	456
19424	plos one	456
23117	molecular biology of the cell	455
9904	nature genetics	455
5449	scientific reports	455
22163	plos one	455
7577	bmc genomics	455
16338	journal of neuroscience	454
15330	nature methods	454
14404	journal of neuroscience	453
29859	scientific reports	453
31118	pnas	453
25753	molecular biology and evolution	453
21787	scientific reports	452
8631	genome biology and evolution	452
14137	journal of neuroscience	452
21553	plos one	451
1944	genome biology and evolution	450
14987	neuroimage	450
10735	plos genetics	450
8156	scientific reports	450
28101	plos one	450
30866	biophysical journal	450
29761	scientific reports	449
27420	scientific reports	449
24067	development	448
29580	plos genetics	448
9434	nature genetics	448
23119	molecular biology of the cell	448
15223	pnas	447
26019	genetics	447
22788	scientific reports	447
9635	cell reports	447
31010	biophysical journal	447
25137	genome biology	446
19265	nature communications	446
7637	plos one	445
10645	plos genetics	444
28857	scientific reports	444
24633	peerj	444
26498	genome research	443
26249	scientific reports	443
22369	cell reports	442
20721	scientific reports	442
29917	nature communications	442
6205	plos one	442
29877	nature communications	442
29887	plos computational biology	441
14094	plos computational biology	441
4156	bmc genomics	441
4109	gigascience	440
15815	nature communications	440
11985	plos genetics	440
4948	nature methods	439
12914	pnas	439
9699	nature genetics	439
29645	bioinformatics	439
5213	gigascience	438
12868	elife	438
13793	pnas	438
6910	bmc bioinformatics	438
6204	plos one	438
8046	plos computational biology	437
25309	genome biology and evolution	437
4354	bioinformatics	437
10122	plos one	437
5496	plos computational biology	436
24838	plos one	435
14853	scientific reports	435
25805	scientific reports	435
17300	plos computational biology	434
4686	plos one	434
10145	plos one	434
22974	elife	434
29654	scientific reports	434
29564	pnas	433
7732	genome research	433
25481	plos biology	433
9786	plos genetics	432
7545	nature genetics	432
26130	plos genetics	432
4648	bioinformatics	431
16093	elife	431
8157	genome research	430
14382	elife	430
4209	nature methods	430
14906	nature communications	430
8225	bmc bioinformatics	430
29901	plos computational biology	430
6319	nature communications	430
20881	elife	429
5017	nucleic acids research	429
30630	nature communications	429
22942	nature communications	428
12059	g3: genes|genomes|genetics	428
1861	genome research	428
15020	journal of neuroscience	427
27255	cell reports	427
13215	plos computational biology	426
4409	bmc genomics	426
29134	scientific reports	425
30031	plos one	425
24008	plos genetics	425
6547	mbio	424
12805	pnas	424
2938	nucleic acids research	424
10329	scientific reports	423
8478	bmc bioinformatics	423
4716	nature communications	423
15144	elife	423
17995	scientific reports	423
27500	nucleic acids research	423
16167	nature communications	422
17680	plos one	422
8358	bioinformatics	422
25390	nucleic acids research	422
15421	nature communications	422
24497	genome biology and evolution	422
22782	nature communications	422
16325	neuroimage	422
5777	bmc bioinformatics	422
10557	genome research	422
23761	scientific reports	421
4484	peerj	420
29302	bioinformatics	420
8587	bioinformatics	420
10894	nature genetics	419
1553	mbio	419
16353	scientific reports	419
4237	bioinformatics	419
13537	plos one	419
8281	genome research	419
8018	nature communications	419
8097	nature methods	419
3993	bmc bioinformatics	418
24207	molecular biology and evolution	418
15090	nature communications	417
16360	plos one	417
15431	journal of neuroscience	417
4114	bmc bioinformatics	417
3792	scientific reports	417
3800	cell reports	417
25490	nature communications	417
5712	bioinformatics	416
7892	bmc genomics	416
22916	molecular biology of the cell	416
24713	scientific reports	415
6441	pnas	415
2000	genome research	415
15053	nature communications	415
12423	elife	415
16675	plos computational biology	414
25992	molecular ecology	413
15547	nature communications	413
27174	nucleic acids research	413
9841	molecular biology and evolution	413
2284	bioinformatics	413
10063	nature genetics	413
3643	plos computational biology	412
28343	peerj	412
15220	plos computational biology	412
4127	bmc bioinformatics	412
14956	plos one	412
7442	genome biology	412
7257	plos genetics	411
4410	gigascience	411
25923	molecular ecology	411
14562	nature communications	410
6603	scientific reports	410
7951	elife	410
19899	cell reports	410
8627	plos computational biology	410
29648	pnas	410
25467	plos genetics	409
30922	nature communications	409
4632	bioinformatics	409
26512	plos computational biology	409
25400	plos biology	408
7313	pnas	408
15367	plos computational biology	408
13467	plos one	408
30760	pnas	407
10278	nature genetics	407
20798	plos computational biology	407
23827	plos genetics	407
6613	mbio	407
29889	plos computational biology	406
7831	genome research	406
10132	genetics	406
3620	plos computational biology	406
23022	elife	406
24529	genome biology and evolution	406
5679	biophysical journal	406
25347	molecular ecology	405
6700	plos one	405
7000	nature methods	405
10173	g3: genes|genomes|genetics	405
7974	genome research	405
17560	molecular biology of the cell	405
7318	genome research	405
7466	bmc bioinformatics	404
25991	pnas	404
1300	bmc genomics	404
7171	bioinformatics	403
21050	nature communications	403
18132	nucleic acids research	402
23126	pnas	402
14413	elife	402
1578	genome biology	402
29471	bioinformatics	401
25464	molecular biology and evolution	401
28898	nature communications	400
23763	nature communications	400
7485	plos genetics	400
14590	plos one	400
17766	plos one	399
7779	genome research	399
29824	plos one	399
3137	bioinformatics	398
15423	nature communications	398
6214	cell reports	398
25295	scientific reports	397
13945	journal of neuroscience	397
7381	genome research	397
23872	scientific reports	397
9969	scientific reports	396
25735	genome biology and evolution	396
25318	genome biology	395
15398	plos computational biology	394
15898	neuroimage	394
23967	elife	394
12224	plos one	394
13899	neuroimage	393
20797	pnas	393
30861	elife	393
4264	bmc genomics	393
25964	genome biology and evolution	393
9220	plos genetics	393
30054	bioinformatics	393
2970	genome biology	392
12273	journal of neuroscience	392
4223	plos computational biology	392
3681	plos one	391
29912	plos computational biology	391
2257	genome research	391
6810	genome biology and evolution	391
13323	journal of neuroscience	390
9975	nature communications	390
10252	scientific reports	390
15804	plos one	390
14525	plos computational biology	390
4557	nucleic acids research	389
3813	bmc bioinformatics	389
6146	nature communications	389
10018	plos genetics	389
5040	bioinformatics	389
25554	plos genetics	389
5020	plos one	389
7887	elife	388
8803	bmc bioinformatics	388
7159	bmc bioinformatics	388
15165	plos computational biology	387
21212	elife	387
30636	biophysical journal	387
7619	gigascience	387
5425	genome biology	386
7842	scientific reports	386
17104	pnas	386
3579	nature communications	386
21784	nucleic acids research	386
23227	plos one	386
4142	elife	386
13027	plos biology	385
23899	elife	385
13750	journal of neuroscience	385
7425	scientific reports	384
20126	scientific reports	384
13490	journal of neuroscience	384
8639	plos genetics	384
18542	nature communications	384
29879	mbio	384
15879	nature communications	384
17699	elife	384
15528	journal of neuroscience	384
4230	bmc bioinformatics	384
10279	nature communications	383
15327	plos computational biology	383
16165	neuroimage	383
4456	plos computational biology	383
11523	nature communications	383
3999	plos one	383
13293	neuroimage	382
10160	g3: genes|genomes|genetics	382
23849	development	382
25188	plos genetics	381
14153	journal of neuroscience	381
4094	plos computational biology	381
5067	gigascience	381
4157	nature methods	381
8380	plos genetics	381
25869	molecular biology and evolution	379
13928	neuroimage	379
21543	nature communications	379
22794	scientific reports	379
15930	plos computational biology	378
5569	plos computational biology	378
2247	genome biology	378
15005	plos biology	378
10769	pnas	377
21109	plos one	377
13267	plos computational biology	377
4073	plos one	377
5161	nucleic acids research	377
10590	nature genetics	376
7737	genome research	376
9159	nature genetics	376
4895	genome research	376
7741	genome research	376
19222	peerj	375
5415	scientific reports	375
9905	pnas	375
25996	plos genetics	375
2613	plos one	375
21637	nature communications	375
8069	plos one	374
16202	elife	374
6043	nature communications	374
10427	genome biology and evolution	374
24753	plos genetics	374
7617	genome biology	374
25338	genome biology	374
8148	genome research	374
14001	elife	374
28767	nucleic acids research	373
3731	gigascience	373
29000	nature communications	373
26356	plos genetics	373
4523	bioinformatics	373
28666	plos one	373
4218	bioinformatics	373
15793	scientific reports	372
10670	plos genetics	372
4459	nature communications	372
14934	genetics	372
3819	plos computational biology	371
10523	nature genetics	371
8523	nature genetics	371
25948	genome biology and evolution	371
29534	pnas	371
13624	journal of neuroscience	371
22993	elife	371
5229	nature communications	371
24982	molecular ecology	370
7652	bmc genomics	370
2087	plos one	370
25402	plos genetics	370
13780	neuroimage	370
29333	scientific reports	369
16447	journal of neuroscience	369
22700	plos one	369
8444	genome biology and evolution	369
8814	genome biology	369
18249	neuroimage	369
5890	plos one	369
21572	nature genetics	369
15801	elife	369
4731	molecular biology and evolution	369
3599	nature communications	368
7765	nature genetics	368
7444	genome research	368
23748	plos biology	367
5994	scientific reports	367
29878	plos one	367
3984	bioinformatics	367
9779	nature genetics	367
25799	nature communications	367
7233	molecular ecology	367
5313	bmc bioinformatics	366
4273	nature communications	366
30628	elife	366
25300	genetics	366
3254	plos computational biology	365
10680	plos one	365
16054	nature communications	365
8081	genome research	365
4838	bmc bioinformatics	364
30100	plos one	364
29603	genome biology	364
9488	g3: genes|genomes|genetics	363
16444	journal of neuroscience	363
10133	bmc genomics	363
27707	elife	363
5294	bioinformatics	362
23130	molecular biology of the cell	362
25450	genome biology and evolution	362
14627	cell reports	362
3138	plos computational biology	361
7794	elife	361
13400	elife	361
20773	scientific reports	361
7680	genome research	361
9468	nature communications	361
19060	molecular ecology	360
5099	plos computational biology	360
5101	nature methods	360
9952	plos genetics	360
5242	gigascience	360
1819	genome biology and evolution	360
9950	nature genetics	360
10544	nature communications	360
26070	genetics	360
7376	plos one	359
22442	elife	359
26602	elife	359
25853	plos biology	359
22387	nature communications	359
7962	genome biology	358
15738	plos one	358
25221	scientific reports	358
23145	biophysical journal	358
24011	development	358
9764	nature communications	358
7009	genome biology and evolution	358
29457	plos computational biology	358
9955	genome research	357
4565	nature communications	357
7782	cell reports	357
15366	journal of neuroscience	357
4792	genome biology	357
24556	genome biology	357
25778	genome biology and evolution	357
3838	bmc genomics	357
14284	pnas	357
25569	genetics	357
15243	pnas	357
14064	plos one	356
29991	scientific reports	356
7701	nature communications	356
22923	molecular biology of the cell	356
19189	bioinformatics	356
30852	biophysical journal	356
13577	journal of neuroscience	355
9781	g3: genes|genomes|genetics	355
1223	mbio	355
30976	elife	355
15133	scientific reports	354
25428	genetics	354
17099	plos biology	354
4167	scientific reports	354
4059	genome research	354
4890	plos computational biology	354
10318	elife	354
7357	nature communications	354
15339	plos one	353
3746	scientific reports	353
16288	scientific reports	353
7738	nature genetics	353
29682	plos computational biology	353
9364	pnas	353
1209	scientific reports	352
7681	genome research	352
6569	bmc genomics	352
15083	nature communications	352
3609	peerj	352
13965	nature communications	351
14545	plos computational biology	351
5627	plos one	351
6314	mbio	351
8262	nucleic acids research	351
26607	plos genetics	351
14071	peerj	351
22678	nature communications	351
16214	nature communications	350
4609	bioinformatics	350
4998	g3: genes|genomes|genetics	350
25917	molecular ecology	350
4361	bioinformatics	350
6369	mbio	350
8502	bmc genomics	350
25994	scientific reports	349
2874	bmc bioinformatics	349
3612	scientific reports	349
9939	scientific reports	349
14581	neuroimage	349
15508	plos biology	349
13938	neuroimage	349
10282	elife	349
7982	genome research	348
3079	bioinformatics	348
4386	bioinformatics	348
4959	genome research	348
14478	elife	348
8550	peerj	348
4855	bmc bioinformatics	348
7900	nature communications	347
4417	plos computational biology	347
22353	pnas	347
6238	elife	347
21783	g3: genes|genomes|genetics	347
25883	plos genetics	347
13131	nature communications	347
8828	nature genetics	346
28513	molecular ecology	346
19328	scientific reports	346
26125	molecular ecology	346
16286	elife	346
5136	peerj	346
5441	plos one	345
14346	cell reports	345
25792	genome biology and evolution	345
5758	bioinformatics	345
5243	genome biology	345
5176	g3: genes|genomes|genetics	345
25933	molecular ecology	344
25343	nature communications	344
5353	bmc bioinformatics	344
11356	nature communications	344
19950	scientific reports	344
29714	cell reports	344
26575	genome biology and evolution	344
14373	elife	344
7890	scientific reports	343
30033	plos computational biology	343
5249	gigascience	343
5320	nucleic acids research	343
20793	scientific reports	343
3940	elife	343
25084	plos one	343
18186	pnas	343
7421	genetics	343
22776	scientific reports	343
10699	scientific reports	342
26637	pnas	342
14817	elife	342
16832	plos computational biology	342
21607	cell reports	342
3306	genome biology	342
13932	pnas	342
6493	scientific reports	342
25835	nature genetics	342
2367	nature methods	342
28377	genome biology	342
7494	bmc genomics	342
15618	nature communications	341
29768	plos computational biology	341
15566	nature communications	341
10463	genome biology and evolution	341
21536	plos genetics	341
8690	nature genetics	341
6090	scientific reports	341
15496	scientific reports	341
11462	nature communications	341
8361	nucleic acids research	340
12846	scientific reports	340
19080	pnas	340
4243	bioinformatics	340
7906	bmc genomics	340
25767	molecular ecology	340
9371	bmc genomics	340
30106	plos biology	340
5512	genome research	340
21514	development	340
26686	plos biology	340
15017	plos computational biology	339
8095	nature genetics	339
15166	scientific reports	339
3201	genome research	339
8028	nature genetics	339
8243	genome research	339
2747	bmc bioinformatics	338
25830	pnas	338
26111	genetics	338
30864	biophysical journal	338
14861	elife	338
25355	plos genetics	338
22834	nucleic acids research	338
8203	plos genetics	338
2924	gigascience	338
5307	bmc genomics	338
4671	nature communications	337
6000	plos one	337
14341	scientific reports	337
6667	plos one	337
4434	plos one	337
30422	elife	337
29611	scientific reports	337
7849	scientific reports	337
27683	plos genetics	337
7899	gigascience	337
30107	plos computational biology	337
4917	scientific reports	336
9428	nature genetics	336
24381	cell reports	336
4270	plos one	336
15307	journal of neuroscience	336
17770	scientific reports	336
7428	molecular biology and evolution	336
14787	scientific reports	336
8098	nature genetics	336
26532	molecular biology and evolution	336
8476	genome biology	336
25545	plos one	336
25203	elife	335
23896	development	335
22573	molecular biology of the cell	335
9425	plos genetics	335
1583	scientific reports	334
30091	elife	334
4170	bmc bioinformatics	334
27520	scientific reports	334
3063	genome biology	334
3755	cell reports	334
15851	plos computational biology	334
9592	pnas	334
6490	nature communications	334
15032	plos computational biology	333
15412	scientific reports	333
18251	nature communications	333
30723	plos one	333
24073	scientific reports	333
7165	genome research	333
24780	genetics	333
9450	g3: genes|genomes|genetics	333
29186	molecular biology of the cell	332
9475	genome research	332
13927	plos one	332
23932	development	332
4395	scientific reports	332
20465	scientific reports	332
3482	bioinformatics	332
21663	nature communications	332
38587	molecular ecology	331
22500	nature communications	331
15204	neuroimage	331
26392	genetics	331
10042	genome research	331
15675	plos one	331
8261	plos one	330
1566	plos one	330
15523	development	330
30958	biophysical journal	330
19449	plos one	330
7163	bmc genomics	330
15372	scientific reports	329
29613	plos one	329
23128	plos one	329
4186	bioinformatics	329
16207	journal of neuroscience	329
4011	bmc bioinformatics	329
7798	pnas	329
15227	scientific reports	329
15084	nature communications	329
3981	bioinformatics	329
8517	scientific reports	329
21269	nucleic acids research	328
16028	cell reports	328
8655	nucleic acids research	328
1194	nucleic acids research	328
6898	nature communications	328
1478	mbio	328
4018	genome research	328
14617	nature communications	328
27337	plos one	328
6303	peerj	328
3949	nature methods	327
8716	genome research	327
27129	scientific reports	327
7596	plos one	327
9910	pnas	327
8132	bmc genomics	327
9555	plos genetics	327
10027	nature genetics	327
3031	plos computational biology	327
11488	pnas	326
4556	scientific reports	326
29588	scientific reports	326
15736	scientific reports	326
17223	plos one	326
4360	genome research	326
5636	bioinformatics	326
26670	nature genetics	326
14930	nature communications	325
15188	scientific reports	325
14834	nature communications	325
16498	nature communications	325
9853	nature genetics	325
5345	bmc bioinformatics	325
3845	bioinformatics	325
17237	plos one	324
9920	plos genetics	324
4274	nature communications	324
24811	scientific reports	324
25220	nucleic acids research	324
4873	nucleic acids research	323
3592	nucleic acids research	323
7724	nature communications	323
12139	elife	323
4148	scientific reports	323
30946	elife	323
10193	plos genetics	323
4166	bioinformatics	323
10631	molecular biology and evolution	323
11529	plos computational biology	323
6541	scientific reports	323
5305	bioinformatics	322
8403	nature methods	322
7217	nature communications	322
1323	plos computational biology	322
7065	bmc genomics	322
28991	scientific reports	322
38807	nature methods	322
7806	g3: genes|genomes|genetics	322
3589	nucleic acids research	322
7572	genome research	322
1741	genome research	322
13383	journal of neuroscience	321
15442	nature communications	321
7486	genome biology	321
23960	plos genetics	321
29742	mbio	321
22727	cell reports	321
6357	mbio	321
15990	scientific reports	321
9104	nature genetics	321
8322	plos genetics	321
20368	plos one	320
8259	genome research	320
7802	pnas	320
25146	molecular ecology	320
4952	nucleic acids research	320
28714	plos biology	320
6451	scientific reports	320
1680	genome research	320
7226	nature genetics	320
15488	scientific reports	320
569	gigascience	320
22640	biophysical journal	319
8377	plos genetics	319
4782	peerj	319
7749	elife	319
7454	genome research	319
7512	nature communications	319
8448	scientific reports	319
13390	journal of neuroscience	319
6406	nature communications	319
14123	nature methods	319
4630	genome biology	319
5669	plos one	318
10147	nature communications	318
3966	nature communications	318
27383	nature communications	318
10006	nature genetics	318
8430	plos computational biology	318
25482	molecular biology and evolution	318
4875	nature communications	318
30297	nature communications	318
25182	scientific reports	318
22745	nature communications	317
6184	pnas	317
23074	nature communications	317
9932	nature genetics	317
8436	plos one	317
8525	bioinformatics	317
29016	nucleic acids research	317
28897	nature communications	317
26595	peerj	317
5579	bioinformatics	317
30690	scientific reports	317
16547	plos one	317
7404	elife	317
25947	plos computational biology	316
18871	plos one	316
4406	bioinformatics	316
24163	elife	316
8013	genome research	316
24971	molecular ecology	316
16094	neuroimage	316
4341	bioinformatics	316
7866	g3: genes|genomes|genetics	315
25562	nature communications	315
5414	bioinformatics	315
9607	nucleic acids research	315
29820	plos one	315
4711	nucleic acids research	315
3545	bmc bioinformatics	315
12688	scientific reports	315
26088	plos one	315
30086	plos one	315
3490	bioinformatics	315
18959	plos one	314
23021	pnas	314
15112	elife	314
11696	pnas	314
3408	bmc genomics	314
7879	genome biology and evolution	314
3547	bioinformatics	314
5891	bmc genomics	314
24099	development	314
29551	nature communications	314
18172	plos one	313
7913	nature communications	313
14913	scientific reports	313
26480	elife	313
30914	nature communications	313
2131	genome research	313
9476	nature genetics	313
15959	neuroimage	313
14810	elife	313
25780	genome research	313
29695	scientific reports	313
28177	elife	313
5510	plos computational biology	313
5123	genome biology	313
5325	scientific reports	313
16464	neuroimage	312
12138	elife	312
11244	plos one	312
10341	g3: genes|genomes|genetics	312
7552	elife	312
3976	elife	312
6302	scientific reports	312
4086	genome biology	312
21486	plos genetics	311
5273	plos computational biology	311
8737	nature methods	311
5052	bmc bioinformatics	311
26527	bmc genomics	311
26426	g3: genes|genomes|genetics	311
22964	molecular biology of the cell	311
21668	cell reports	310
20345	scientific reports	310
8182	nature methods	310
24779	plos biology	310
14659	pnas	310
8640	nature communications	310
3543	bmc bioinformatics	310
16142	scientific reports	310
16368	molecular biology of the cell	310
5299	genome biology	310
24016	nature communications	310
9802	pnas	309
18918	molecular ecology	309
15643	elife	309
18885	scientific reports	309
27439	elife	309
5350	plos computational biology	309
13290	neuroimage	309
16156	gigascience	309
7788	genome biology and evolution	308
20912	scientific reports	308
21591	scientific reports	308
17186	elife	308
15224	journal of neuroscience	308
7767	genetics	308
19185	plos one	308
11323	nature communications	308
14960	biophysical journal	308
10977	cell reports	308
7261	plos one	308
22849	molecular biology of the cell	307
6287	plos biology	307
15161	scientific reports	307
5442	bioinformatics	307
22893	plos computational biology	307
27188	nature communications	307
8112	genome research	307
11291	nature methods	307
8949	mbio	307
29985	nature communications	307
10490	scientific reports	307
7156	nature communications	307
18984	elife	307
25259	genetics	307
26597	plos computational biology	307
4080	plos one	306
30736	biophysical journal	306
4760	bioinformatics	306
11887	neuroimage	306
10352	scientific reports	306
12735	journal of neuroscience	305
29988	plos biology	305
8718	plos biology	305
2994	bioinformatics	305
7727	nature genetics	305
24432	plos one	305
8026	scientific reports	305
28654	plos computational biology	304
15139	journal of neuroscience	304
30874	scientific reports	304
21931	nature communications	304
15449	plos genetics	304
14190	nature communications	304
9951	development	304
14042	journal of neuroscience	304
24319	genome biology and evolution	304
6450	bmc genomics	304
9570	elife	304
2895	bioinformatics	304
28224	g3: genes|genomes|genetics	303
13948	neuroimage	303
14304	elife	303
11218	scientific reports	303
4407	plos computational biology	303
6718	genome biology and evolution	303
28630	plos one	303
14607	neuroimage	302
27519	molecular biology and evolution	302
1440	nucleic acids research	302
4338	nucleic acids research	302
25463	plos biology	302
17241	scientific reports	302
22538	nature communications	302
24123	genome biology	302
18142	elife	302
4923	nucleic acids research	302
30765	biophysical journal	301
20678	plos computational biology	301
4265	bioinformatics	301
21743	genome research	301
29711	bmc bioinformatics	301
4153	bioinformatics	301
4567	nature methods	301
23906	development	301
4336	plos genetics	301
29524	scientific reports	301
15255	nature communications	301
23660	cell reports	301
28329	scientific reports	301
23465	development	301
7663	nature communications	301
30069	plos one	301
7968	nature communications	301
7179	genome research	301
8347	genome biology	301
15694	nature communications	301
3630	bioinformatics	301
14395	pnas	300
9663	genome biology	300
5701	plos one	300
8730	plos one	300
8741	bioinformatics	300
26541	plos one	300
8750	genome research	300
3694	bmc genomics	300
25633	elife	300
10201	nucleic acids research	300
5598	nature methods	299
7032	elife	299
23080	elife	299
4545	plos computational biology	299
14670	nature communications	299
7189	scientific reports	299
11271	nature communications	299
29726	biophysical journal	299
14756	nature communications	298
9657	nature communications	298
38610	nature communications	298
20910	nature communications	298
13214	elife	298
8318	nature genetics	298
5036	nucleic acids research	298
5212	bioinformatics	298
5577	gigascience	298
9966	plos genetics	298
7343	genome research	298
15342	scientific reports	298
26338	plos genetics	298
14084	nature communications	298
12578	nature communications	297
4554	bmc bioinformatics	297
19110	plos one	297
30993	biophysical journal	297
25036	pnas	297
7670	nature genetics	297
10356	nature genetics	297
23110	molecular biology of the cell	297
13976	neuroimage	297
4633	scientific reports	296
24204	molecular biology and evolution	296
3866	nature methods	296
7175	nature communications	296
4151	scientific reports	295
13493	pnas	295
15048	elife	295
21811	nature communications	295
18823	scientific reports	295
10026	nature communications	295
29865	bioinformatics	295
15740	plos one	295
21406	pnas	295
9947	plos genetics	295
30791	biophysical journal	295
26064	genetics	295
7331	nature methods	295
8214	elife	295
25629	genetics	295
7256	nucleic acids research	294
5675	nucleic acids research	294
25474	molecular ecology	294
16014	scientific reports	294
29592	scientific reports	294
5729	bmc genomics	294
20735	nature communications	294
30992	plos one	294
16343	plos one	294
14686	elife	294
3433	genome biology	294
30530	molecular biology of the cell	294
29798	scientific reports	294
5572	genome biology	293
25494	pnas	293
9735	nature genetics	293
15708	elife	293
17771	plos one	293
15748	pnas	293
22743	nature communications	293
15104	scientific reports	293
7246	nature communications	293
15136	plos computational biology	293
8376	nature communications	293
24960	plos genetics	293
3495	bmc bioinformatics	293
8784	nature genetics	293
19927	cell reports	293
7457	genome research	292
24895	scientific reports	292
11559	elife	292
30816	nucleic acids research	292
4534	plos computational biology	292
1453	plos biology	292
18942	nature communications	292
8704	cell reports	292
14566	journal of neuroscience	292
9731	nature genetics	292
5484	nature methods	291
5034	elife	291
10550	genetics	291
3594	nature methods	291
14937	neuroimage	291
17755	peerj	291
27523	plos one	291
29621	scientific reports	291
26256	genetics	290
19935	pnas	290
30800	pnas	290
5043	g3: genes|genomes|genetics	290
16374	scientific reports	290
2525	plos computational biology	289
23705	development	289
8798	peerj	289
5194	pnas	289
4040	genome biology	289
4483	plos computational biology	289
12107	journal of neuroscience	289
25197	molecular ecology	289
8535	g3: genes|genomes|genetics	289
5651	genome biology	289
4272	plos computational biology	289
17536	pnas	289
38602	scientific reports	289
6617	plos one	288
14459	cell reports	288
8567	nucleic acids research	288
16504	nature communications	288
7398	bmc genomics	288
25047	pnas	288
5718	pnas	288
8333	scientific reports	288
7867	genome research	288
30950	biophysical journal	288
9621	plos genetics	288
11113	plos computational biology	288
8833	bmc genomics	288
16623	journal of neuroscience	288
3603	nature communications	288
8626	bioinformatics	287
22778	cell reports	287
25024	genome biology	287
26626	bmc genomics	287
25841	mbio	287
26379	pnas	287
7661	nature genetics	287
9523	plos genetics	287
7646	nature communications	287
9238	molecular ecology	287
3719	nature communications	287
26340	molecular biology and evolution	287
5203	plos computational biology	287
16321	elife	287
14203	journal of neuroscience	287
15244	scientific reports	287
14626	plos one	287
23816	development	287
3799	gigascience	287
5543	plos one	287
7954	genome research	287
24821	plos genetics	287
29815	development	287
14208	neuroimage	287
3115	scientific reports	287
14714	pnas	286
13647	neuroimage	286
7581	scientific reports	286
5381	nucleic acids research	286
4677	bmc bioinformatics	286
7125	cell reports	286
25748	pnas	286
3332	bmc bioinformatics	286
13760	nature communications	286
18957	plos one	286
28584	plos biology	286
8147	nature communications	286
30755	nature communications	286
18266	plos one	286
24957	g3: genes|genomes|genetics	286
7089	gigascience	286
14318	pnas	286
5642	bioinformatics	286
3937	nature methods	286
9960	plos genetics	286
8227	plos one	286
38674	plos one	285
9770	nature communications	285
7914	nature genetics	285
10205	cell reports	285
5652	peerj	285
12451	journal of neuroscience	285
28344	plos one	285
3977	bmc bioinformatics	285
17279	plos one	285
14529	plos biology	285
12395	pnas	285
6828	nature genetics	285
2465	bioinformatics	285
26609	molecular biology and evolution	285
8337	plos computational biology	285
8799	bioinformatics	285
10526	plos genetics	285
18260	nature communications	284
10386	nature genetics	284
14264	neuroimage	284
4936	pnas	284
14275	plos computational biology	284
4584	pnas	284
23879	nature communications	284
4904	bioinformatics	284
9453	elife	284
22718	elife	284
3996	bmc bioinformatics	284
3828	bioinformatics	284
5409	scientific reports	284
9919	pnas	284
14601	peerj	284
5756	genome biology	283
28655	pnas	283
26184	scientific reports	283
22135	nature communications	283
15597	plos one	283
8341	nucleic acids research	283
23718	cell reports	283
5122	scientific reports	283
4115	plos computational biology	283
14495	scientific reports	283
15579	elife	283
20801	scientific reports	283
26628	plos genetics	283
12804	plos one	282
7532	nucleic acids research	282
13834	plos computational biology	282
21508	plos computational biology	282
7669	nature genetics	282
5131	nucleic acids research	282
10354	nature genetics	282
7045	nucleic acids research	282
22809	nature communications	282
16412	elife	282
13813	gigascience	282
6236	mbio	282
10348	plos genetics	282
16115	elife	282
8138	genome research	282
10828	pnas	282
7024	nature communications	282
5653	scientific reports	282
8427	cell reports	281
26080	genetics	281
15205	scientific reports	281
31038	elife	281
7149	nature communications	281
14630	neuroimage	281
10445	g3: genes|genomes|genetics	281
7131	cell reports	281
7395	nature communications	281
5288	nucleic acids research	281
4596	nature communications	281
21541	peerj	281
3669	bioinformatics	281
18144	plos one	281
30520	plos one	281
9672	scientific reports	281
4996	nature communications	281
4259	bioinformatics	280
5290	bmc bioinformatics	280
2536	genome biology	280
22583	nature communications	280
5064	bmc bioinformatics	280
25251	nature genetics	280
26582	plos genetics	280
7836	elife	280
26384	pnas	280
7760	bmc genomics	280
9845	pnas	280
14649	nature methods	280
3879	bioinformatics	279
8009	bioinformatics	279
10250	plos genetics	279
4706	bioinformatics	279
24027	development	279
10275	plos genetics	279
31116	scientific reports	279
13350	elife	279
1458	plos one	279
38779	plos computational biology	279
7382	scientific reports	279
20019	scientific reports	279
25678	molecular ecology	279
5145	pnas	279
29759	plos computational biology	279
23972	elife	279
7418	nature genetics	278
26084	genetics	278
14637	journal of neuroscience	278
7443	genetics	278
5253	plos one	278
4316	bioinformatics	278
4856	scientific reports	278
20911	nature communications	278
10493	scientific reports	278
10261	plos one	278
9765	scientific reports	278
4925	plos computational biology	278
27103	nature methods	278
9762	molecular biology and evolution	277
30547	pnas	277
7756	nature communications	277
14185	scientific reports	277
4347	plos computational biology	277
7324	genome research	277
3738	nucleic acids research	277
4730	nature methods	277
10109	nature genetics	277
4231	nature methods	277
4277	bioinformatics	277
28294	nature communications	277
3962	bmc bioinformatics	277
4250	genome biology	276
30757	scientific reports	276
13576	plos computational biology	276
8601	plos genetics	276
4097	nature methods	276
9778	plos genetics	276
21657	scientific reports	276
16693	journal of neuroscience	276
25211	genetics	276
31148	peerj	276
9818	nature genetics	276
9993	nature genetics	276
4276	nucleic acids research	275
21340	nature communications	275
28943	nature communications	275
4253	bioinformatics	275
29641	plos genetics	275
18686	scientific reports	275
11131	scientific reports	275
10718	plos genetics	275
5881	scientific reports	275
5135	nature communications	274
26219	biophysical journal	274
3952	genome biology	274
29709	cell reports	274
19208	elife	274
14863	pnas	274
9754	plos one	274
30945	pnas	274
15857	journal of neuroscience	274
5499	genome research	274
24874	nature communications	274
27527	nucleic acids research	274
10373	genome biology and evolution	274
14964	journal of neuroscience	274
4294	nature methods	274
23078	genetics	274
16063	plos one	274
3968	bioinformatics	274
25684	elife	274
13902	scientific reports	274
9303	nature genetics	274
14502	neuroimage	273
17558	nature communications	273
22608	molecular biology of the cell	273
3666	bmc bioinformatics	273
10064	g3: genes|genomes|genetics	273
8216	genome biology	273
3047	plos computational biology	273
13685	plos computational biology	273
7437	plos genetics	273
19942	nature communications	273
15896	cell reports	273
16125	pnas	273
20865	pnas	273
10701	plos genetics	273
22507	cell reports	273
25541	genome biology and evolution	273
7671	nature methods	273
14672	plos computational biology	273
13871	nature communications	273
15135	scientific reports	273
10470	nature genetics	272
14838	cell reports	272
9546	nature genetics	272
7254	genome research	272
30473	scientific reports	272
9406	plos one	272
8257	bmc genomics	272
8830	plos one	272
23753	development	272
4284	genome biology	272
15076	nature communications	272
2868	peerj	272
12049	plos computational biology	272
14729	plos computational biology	272
7383	plos genetics	272
6256	scientific reports	272
28609	nature communications	272
30661	pnas	272
25079	plos genetics	272
14646	journal of neuroscience	272
7289	nature communications	272
19442	plos one	272
10498	plos genetics	271
26330	pnas	271
14146	peerj	271
16138	molecular biology of the cell	271
15766	elife	271
15323	nature communications	271
30781	nucleic acids research	271
14701	neuroimage	271
16390	scientific reports	271
21723	plos one	271
21463	nature communications	271
6754	nature communications	271
14128	nature communications	271
4892	scientific reports	271
8004	plos genetics	271
7316	nature genetics	271
27710	plos one	270
25988	elife	270
9855	plos genetics	270
23063	elife	270
13746	plos computational biology	270
5504	nature genetics	270
8482	genome biology	270
8167	genome biology and evolution	270
11242	scientific reports	270
30634	pnas	270
4600	nature communications	270
8536	plos genetics	270
7636	bmc genomics	270
11042	elife	270
12990	scientific reports	269
18279	plos one	269
29868	scientific reports	269
11452	plos one	269
15601	plos biology	269
5085	gigascience	269
15087	neuroimage	269
16058	neuroimage	269
3658	nucleic acids research	269
3833	plos computational biology	269
8763	genome research	268
26444	plos genetics	268
22785	plos biology	268
23796	scientific reports	268
29076	plos computational biology	268
23915	development	268
13235	elife	268
27304	nature methods	268
12899	nature communications	268
7368	genome research	268
22806	nature communications	268
15988	journal of neuroscience	268
27153	nature communications	268
10333	plos genetics	268
6747	mbio	268
5552	bioinformatics	267
22488	elife	267
2913	plos computational biology	267
22413	nature communications	267
25977	genetics	267
2503	bioinformatics	267
10247	genome biology and evolution	267
7658	nature methods	267
29657	plos computational biology	267
13561	scientific reports	267
3324	bioinformatics	267
8241	gigascience	267
15571	pnas	266
3315	nucleic acids research	266
15534	scientific reports	266
7126	genome biology	266
24075	development	266
16704	elife	266
4322	genome biology	266
23580	nature communications	266
10311	genetics	266
9611	elife	266
7057	bioinformatics	266
21828	genome research	266
24755	plos genetics	266
6132	mbio	266
25124	pnas	266
4252	nature methods	266
10000	plos one	266
7697	nucleic acids research	266
28335	development	266
9721	plos genetics	265
4242	nature communications	265
25326	scientific reports	265
7298	bmc genomics	265
27303	plos one	265
4613	scientific reports	265
14800	nature communications	265
4388	plos computational biology	265
10050	g3: genes|genomes|genetics	265
23677	elife	265
27647	bioinformatics	265
4369	scientific reports	265
10710	plos genetics	265
10538	plos genetics	265
10378	scientific reports	265
16644	elife	264
7852	nature methods	264
18465	peerj	264
8829	bmc genomics	264
5266	nucleic acids research	264
28150	gigascience	264
2580	scientific reports	264
3522	bioinformatics	264
1302	mbio	264
29915	plos computational biology	264
9385	genetics	264
9322	pnas	264
22663	elife	264
25377	peerj	264
11082	elife	264
5408	bmc bioinformatics	264
20752	scientific reports	264
27396	nucleic acids research	264
14211	scientific reports	264
9618	nature genetics	263
18526	peerj	263
3774	nucleic acids research	263
7664	genome research	263
4136	genome research	263
21458	scientific reports	263
29853	cell reports	263
6479	peerj	263
9839	nature communications	263
3992	bioinformatics	263
25375	genetics	263
13573	journal of neuroscience	263
28525	plos one	263
14503	neuroimage	263
4052	bioinformatics	263
14727	neuroimage	263
9800	nature communications	263
4346	nature genetics	262
18167	pnas	262
7183	nature communications	262
27306	nature communications	262
7497	genome research	262
12396	plos biology	262
3894	bmc genomics	262
14394	scientific reports	262
4987	plos computational biology	262
7138	plos genetics	262
12968	neuroimage	262
8764	plos one	262
4965	plos one	262
25223	nature methods	262
29194	molecular biology of the cell	262
29897	nucleic acids research	262
24863	scientific reports	262
26066	genome biology and evolution	262
14104	elife	262
3971	nature communications	262
24981	g3: genes|genomes|genetics	262
23188	molecular biology of the cell	262
14611	neuroimage	262
8197	genetics	262
13731	elife	262
4044	plos computational biology	262
15280	nature communications	261
5721	bmc bioinformatics	261
6264	elife	261
3488	scientific reports	261
5876	elife	261
24730	peerj	261
1760	genome research	261
19945	nature communications	261
4546	bmc bioinformatics	261
16542	plos one	261
15811	elife	261
30964	scientific reports	261
8570	nucleic acids research	261
21833	cell reports	261
7307	nature communications	261
16646	neuroimage	261
19210	plos one	261
7747	scientific reports	260
30807	plos one	260
5522	scientific reports	260
22687	nature communications	260
30581	biophysical journal	260
23039	molecular biology of the cell	260
23096	molecular biology of the cell	260
12767	scientific reports	260
27346	nature genetics	260
15170	elife	260
9744	nature communications	260
3850	neuroimage	260
16147	neuroimage	260
6950	genome research	260
19918	scientific reports	260
13651	neuroimage	260
13861	neuroimage	260
13139	neuroimage	260
14910	neuroimage	259
25552	molecular biology and evolution	259
3501	bioinformatics	259
3725	nature communications	259
8817	genome biology	259
24910	nature communications	259
26351	molecular ecology	259
9961	pnas	259
18056	elife	259
23951	plos biology	259
3688	genome research	259
5592	bioinformatics	259
7227	nature communications	259
25949	scientific reports	259
6265	plos computational biology	259
12770	plos one	259
23208	scientific reports	259
30099	development	259
20805	scientific reports	259
5889	nature communications	259
22909	molecular biology of the cell	259
4535	genome research	258
29105	plos computational biology	258
14151	nature communications	258
3010	bioinformatics	258
8406	genome biology	258
14004	g3: genes|genomes|genetics	258
26517	molecular biology and evolution	258
16299	journal of neuroscience	258
29863	plos biology	258
3491	bioinformatics	258
8125	bmc genomics	258
21484	nature communications	258
19106	plos one	258
12484	journal of neuroscience	258
8609	genome research	258
22411	scientific reports	258
15457	plos computational biology	258
14150	nature communications	258
25324	molecular biology and evolution	258
11381	elife	258
4152	genome biology	257
25433	pnas	257
3167	nature communications	257
2545	pnas	257
21349	nature communications	257
13692	nature communications	257
6704	scientific reports	257
21606	cell reports	257
3511	gigascience	257
15667	elife	257
9435	nature genetics	257
29033	plos computational biology	256
31048	plos computational biology	256
5198	bmc bioinformatics	256
30859	pnas	256
15176	neuroimage	256
23956	plos genetics	256
25134	scientific reports	256
19076	peerj	256
7195	gigascience	256
23164	molecular biology of the cell	255
7137	nature communications	255
11170	elife	255
4207	nucleic acids research	255
11758	neuroimage	255
10230	nature genetics	255
10148	nature genetics	255
26818	nucleic acids research	255
28247	plos genetics	255
22761	pnas	255
21713	bmc genomics	254
29437	nature communications	254
16128	journal of neuroscience	254
16517	plos one	254
26546	bioinformatics	254
16467	elife	254
3431	genome biology	254
25962	pnas	254
25550	genome biology and evolution	254
4588	genome research	254
18077	plos one	254
21887	cell reports	254
5269	bmc genomics	254
7555	nature methods	254
29637	pnas	254
3750	nature methods	254
4247	genome biology	254
18804	pnas	254
15240	scientific reports	254
27290	genome biology	254
28071	nature communications	254
15919	plos computational biology	254
7468	genome biology	254
5159	genome research	254
14371	neuroimage	253
4690	biophysical journal	253
5710	bioinformatics	253
24943	nature communications	253
13353	elife	253
3964	gigascience	253
27475	molecular biology and evolution	253
8411	mbio	253
2377	bmc genomics	253
1306	elife	253
6499	scientific reports	253
5344	bioinformatics	253
1294	cell reports	253
9636	nature genetics	253
15757	plos computational biology	253
8014	nucleic acids research	253
6033	peerj	253
24037	development	253
26596	nature genetics	253
29306	cell reports	253
2939	bioinformatics	253
1548	nature communications	252
29546	elife	252
30592	nature communications	252
8239	bmc genomics	252
22634	molecular biology of the cell	252
21003	nature communications	252
6633	bmc bioinformatics	252
29775	elife	252
9345	bioinformatics	252
22780	pnas	252
28912	nature communications	252
23083	scientific reports	252
24088	development	252
16696	journal of neuroscience	252
17029	nature communications	252
6127	plos computational biology	252
23678	elife	252
7653	genome biology and evolution	252
24074	development	252
11162	scientific reports	252
775	mbio	252
3034	bmc bioinformatics	252
23607	nature communications	252
38626	plos computational biology	252
15838	nature communications	252
5133	bmc genomics	252
5426	genome research	251
28432	peerj	251
7854	elife	251
10466	plos genetics	251
14825	scientific reports	251
28472	plos one	251
3764	scientific reports	251
22685	elife	251
18128	nature methods	251
2832	scientific reports	251
25439	genome biology	251
17113	plos one	251
6729	g3: genes|genomes|genetics	251
5119	bioinformatics	251
26358	g3: genes|genomes|genetics	251
6720	plos genetics	251
20106	plos one	251
16690	pnas	251
8800	genetics	251
5548	bioinformatics	251
15044	plos biology	251
25265	bioinformatics	251
2989	nature communications	251
10390	genome biology and evolution	251
15702	neuroimage	251
27429	scientific reports	250
19998	plos one	250
14227	elife	250
30372	nucleic acids research	250
26241	genome biology and evolution	250
29765	plos computational biology	250
7314	genome biology	250
4164	elife	250
31030	biophysical journal	250
5474	plos computational biology	250
16345	scientific reports	250
23076	molecular biology of the cell	250
29553	plos computational biology	250
4821	molecular biology and evolution	250
5434	genome biology	250
15966	neuroimage	250
3587	bmc genomics	250
15706	nature communications	249
29482	nature communications	249
25511	scientific reports	249
16103	plos one	249
21814	plos one	249
20334	scientific reports	249
13699	nature communications	249
16029	plos one	249
5640	nature methods	249
10535	genetics	249
8713	genome research	249
8671	nature genetics	249
[truncated: 5,654 more rows]
