# Supplementary material for: Tracking the popularity and outcomes of all bioRxiv preprints
Source: eLife journal article supplement (doi:10.7554/elife.45133), 2019-04-24
Supplement: supp [file elife-45133-supp-v1.zip › elife_poa_e45133_Table_2_source_data_1.csv]

article	downloads	year	published
16066	99460	2016	True
28654	66396	2016	True
3421	44627	2017	True
10661	39249	2015	True
10561	32012	2015	True
6959	30460	2016	True
30003	30222	2016	True
16272	24612	2016	True
8355	20764	2015	True
18231	20588	2016	True
27470	19556	2016	True
13080	19490	2018	True
10357	19437	2016	True
13873	19117	2017	True
29943	18266	2016	True
10732	17514	2013	True
7960	17508	2017	True
5651	16726	2014	True
4960	15907	2015	True
10394	15386	2016	True
28634	14865	2017	True
8292	14581	2016	True
9684	14481	2017	True
7865	14434	2017	True
1782	13535	2017	True
7786	13288	2017	True
8228	13037	2016	True
19270	12581	2016	True
5681	12404	2014	True
10657	12334	2015	True
7834	12279	2017	True
22539	12234	2018	True
15114	12198	2016	True
8668	12112	2015	True
2367	11780	2017	True
7390	11438	2017	True
7629	10903	2017	True
8249	10880	2016	True
7971	10830	2017	True
15241	10516	2016	True
18110	10264	2017	True
5696	10086	2014	True
28724	9853	2015	True
28985	9778	2016	True
8441	9721	2015	True
9237	9708	2016	True
22772	9556	2017	True
23208	9502	2015	True
5499	9457	2015	True
7973	9445	2017	True
8787	9247	2014	True
5593	9147	2015	True
28714	9069	2015	True
20024	9007	2016	True
8188	8918	2016	True
8023	8748	2016	True
7792	8700	2015	True
7728	8485	2017	True
8473	8451	2016	True
8289	8274	2016	True
5324	8215	2015	True
10360	8145	2016	True
8527	8126	2015	True
8341	7976	2015	True
28259	7905	2017	True
9818	7809	2017	True
10282	7790	2015	True
4567	7745	2016	True
16258	7669	2016	True
13168	7632	2018	True
5693	7320	2014	True
7801	7304	2017	True
7783	7226	2017	True
8683	7129	2015	True
28673	7059	2017	True
22785	7036	2017	True
4694	7012	2016	True
26664	7009	2014	True
14952	6985	2017	True
8050	6958	2016	True
14303	6949	2017	True
16234	6828	2016	True
15377	6808	2017	True
16610	6792	2014	True
5101	6788	2016	True
8828	6781	2014	True
8457	6681	2015	True
29049	6677	2015	True
28711	6654	2016	True
5170	6603	2016	True
19726	6569	2017	True
7421	6559	2017	True
15330	6467	2017	True
9732	6374	2016	True
38807	6282	2016	True
10557	6194	2015	True
7495	6155	2016	True
9322	6133	2017	True
5195	6081	2015	True
7628	6066	2017	True
5112	6019	2016	True
4252	6014	2017	True
7606	5943	2017	True
8617	5913	2015	True
10667	5896	2015	True
8466	5851	2016	True
7896	5818	2017	True
8126	5774	2016	True
5213	5768	2015	True
6721	5721	2015	True
29212	5622	2017	True
28494	5581	2015	True
9487	5579	2017	True
28987	5560	2016	True
16328	5548	2016	True
5025	5533	2016	True
10741	5527	2013	True
8506	5508	2015	True
4630	5502	2016	True
7661	5501	2017	True
20515	5492	2017	True
4175	5453	2017	True
19257	5423	2016	True
21731	5402	2017	True
11291	5377	2017	True
10703	5367	2014	True
8571	5359	2015	True
29051	5272	2014	True
28699	5240	2016	True
14214	5184	2017	True
31058	5138	2016	True
14689	5128	2017	True
5193	5109	2016	True
5358	5108	2015	True
24790	5075	2018	True
7308	5058	2017	True
16398	5052	2016	True
9630	5040	2017	True
5058	5016	2016	True
7833	5008	2016	True
7455	4995	2017	True
10599	4983	2015	True
15829	4916	2016	True
16305	4883	2016	True
27524	4856	2014	True
30975	4807	2016	True
29961	4803	2016	True
27509	4769	2015	True
7868	4725	2016	True
5409	4714	2015	True
7764	4676	2017	True
15687	4645	2017	True
8792	4622	2014	True
10722	4622	2014	True
30037	4593	2014	True
8212	4591	2016	True
16652	4562	2015	True
1983	4561	2018	True
7851	4551	2017	True
3891	4544	2017	True
8207	4540	2016	True
8437	4512	2016	True
5640	4499	2014	True
30823	4498	2017	True
30175	4471	2017	True
5191	4421	2016	True
8156	4389	2016	True
11253	4382	2017	True
8788	4375	2014	True
2012	4360	2018	True
8701	4323	2015	True
10426	4321	2015	True
4948	4309	2016	True
4247	4304	2017	True
4237	4299	2016	True
4097	4279	2017	True
27437	4258	2016	True
4149	4256	2017	True
3481	4249	2017	True
7710	4242	2017	True
8662	4239	2015	True
8313	4217	2016	True
7074	4207	2016	True
4330	4160	2017	True
4044	4134	2017	True
19304	4132	2016	True
27476	4126	2016	True
3866	4116	2017	True
16054	4067	2016	True
4274	4057	2016	True
6905	4053	2018	True
7149	4049	2017	True
11316	4045	2017	True
9731	4036	2017	True
7998	4023	2017	True
5686	4018	2014	True
24053	4017	2016	True
14225	3985	2017	True
9585	3963	2017	True
13874	3946	2017	True
9954	3924	2017	True
27522	3907	2014	True
18199	3903	2017	True
23188	3900	2016	True
21531	3897	2017	True
8121	3889	2016	True
5176	3879	2016	True
18719	3848	2017	True
30260	3844	2018	True
7846	3838	2017	True
4784	3833	2016	True
7887	3821	2017	True
2907	3790	2017	True
5602	3786	2014	True
9841	3785	2017	True
31065	3780	2016	True
8537	3780	2015	True
23769	3780	2017	True
7797	3771	2017	True
23134	3749	2016	True
8253	3748	2016	True
6950	3742	2017	True
3603	3740	2017	True
3719	3728	2017	True
10299	3724	2016	True
5711	3723	2014	True
7756	3718	2017	True
8091	3715	2016	True
20697	3713	2017	True
8021	3711	2017	True
8058	3710	2016	True
7316	3705	2017	True
28567	3703	2018	True
7657	3701	2017	True
29017	3699	2016	True
8205	3699	2016	True
8216	3684	2016	True
569	3673	2018	True
16389	3669	2016	True
26226	3664	2015	True
4294	3663	2017	True
4921	3662	2015	True
7871	3661	2017	True
5151	3660	2016	True
5464	3650	2015	True
27485	3638	2016	True
16698	3638	2014	True
9325	3637	2018	True
10148	3633	2016	True
3162	3625	2017	True
7784	3607	2017	True
5282	3607	2016	True
26132	3604	2015	True
19295	3601	2016	True
3792	3601	2016	True
19502	3597	2018	True
4801	3594	2016	True
27304	3589	2017	True
6745	3572	2015	True
7934	3554	2017	True
24099	3545	2015	True
14924	3544	2017	True
4520	3542	2017	True
15333	3540	2017	True
7032	3537	2017	True
15991	3534	2016	True
8588	3533	2015	True
26588	3526	2014	True
25699	3525	2017	True
7000	3512	2017	True
16494	3509	2016	True
21777	3508	2016	True
16622	3506	2015	True
24381	3505	2017	True
8633	3503	2015	True
7982	3498	2017	True
14649	3488	2017	True
10771	3480	2018	True
3787	3474	2017	True
16119	3471	2014	True
5758	3469	2014	True
2242	3463	2018	True
28350	3460	2017	True
9428	3448	2017	True
7545	3441	2017	True
9930	3433	2017	True
9699	3430	2017	True
9159	3427	2017	True
22976	3425	2017	True
29066	3422	2013	True
25938	3414	2016	True
3750	3411	2017	True
14822	3406	2017	True
11145	3404	2017	True
28877	3402	2017	True
4080	3397	2017	True
10322	3382	2016	True
19899	3370	2017	True
8464	3361	2016	True
5032	3355	2016	True
16524	3340	2015	True
28140	3337	2017	True
8640	3335	2015	True
24078	3328	2015	True
16151	3327	2016	True
25885	3327	2016	True
7755	3325	2017	True
8059	3321	2016	True
25238	3317	2016	True
6828	3315	2017	True
7598	3300	2017	True
22191	3288	2018	True
28669	3287	2017	True
5708	3283	2014	True
4289	3275	2017	True
20948	3272	2014	True
20434	3270	2016	True
8477	3269	2016	True
19181	3265	2016	True
2000	3265	2017	True
3906	3258	2017	True
7974	3257	2017	True
4556	3238	2017	True
5756	3217	2014	True
15693	3216	2017	True
10640	3215	2014	True
7624	3210	2017	True
5064	3204	2015	True
7418	3194	2017	True
5085	3172	2016	True
26356	3170	2015	True
8636	3169	2015	True
26476	3166	2015	True
10733	3160	2014	True
10433	3157	2016	True
18232	3154	2016	True
19212	3148	2016	True
16682	3140	2014	True
10556	3136	2015	True
7832	3134	2017	True
8508	3132	2015	True
8784	3132	2014	True
4523	3131	2016	True
15032	3123	2016	True
26626	3120	2014	True
3579	3116	2017	True
8737	3115	2014	True
4494	3112	2017	True
24762	3107	2017	True
5242	3095	2015	True
7523	3094	2017	True
25260	3093	2017	True
4075	3090	2017	True
3881	3083	2017	True
8123	3070	2016	True
10006	3066	2017	True
5481	3066	2015	True
4490	3065	2017	True
26682	3061	2013	True
4065	3059	2017	True
28452	3055	2016	True
9740	3055	2017	True
5644	3055	2014	True
14947	3052	2017	True
8660	3032	2015	True
2284	3029	2017	True
22958	3024	2017	True
2022	3022	2017	True
29876	3019	2016	True
8750	3017	2013	True
21805	3010	2016	True
23574	3009	2018	True
10193	3005	2016	True
7395	3000	2017	True
5600	2994	2015	True
21670	2986	2017	True
24974	2985	2017	True
25996	2980	2015	True
26609	2980	2013	True
26379	2950	2014	True
7765	2944	2017	True
19041	2935	2017	True
22978	2931	2017	True
8644	2917	2015	True
9883	2917	2017	True
14413	2916	2017	True
31125	2913	2015	True
14507	2909	2017	True
5130	2905	2016	True
11264	2904	2017	True
10407	2903	2016	True
7838	2901	2017	True
4765	2901	2016	True
5717	2898	2014	True
5766	2892	2014	True
4185	2886	2017	True
5751	2883	2014	True
7239	2882	2017	True
5725	2878	2014	True
8265	2875	2016	True
3962	2872	2017	True
5441	2871	2015	True
28609	2864	2018	True
29846	2859	2017	True
4648	2853	2016	True
10710	2851	2014	True
8427	2846	2015	True
10492	2843	2015	True
4271	2838	2017	True
15506	2837	2017	True
15505	2834	2017	True
6419	2833	2017	True
5527	2813	2015	True
7738	2811	2017	True
8762	2807	2014	True
16235	2806	2016	True
18198	2803	2017	True
19435	2803	2014	True
4798	2786	2016	True
11448	2782	2016	True
7486	2782	2017	True
15526	2773	2017	True
26315	2768	2015	True
7992	2767	2017	True
10642	2766	2015	True
28244	2764	2017	True
4268	2762	2016	True
5724	2761	2013	True
8645	2760	2015	True
20888	2757	2016	True
30176	2754	2017	True
25179	2750	2017	True
5484	2749	2015	True
7165	2748	2017	True
10674	2744	2014	True
15655	2744	2016	True
8148	2743	2016	True
4913	2742	2016	True
27324	2742	2016	True
5635	2741	2014	True
5534	2736	2015	True
3817	2724	2017	True
15781	2720	2017	True
14123	2717	2017	True
4062	2716	2017	True
10256	2714	2016	True
5712	2708	2014	True
26485	2708	2014	True
3594	2705	2017	True
7205	2696	2017	True
5153	2689	2016	True
12722	2688	2017	True
26272	2682	2015	True
5104	2682	2016	True
18927	2681	2017	True
10621	2677	2014	True
25466	2675	2017	True
10203	2671	2016	True
15126	2670	2016	True
15147	2668	2017	True
26439	2665	2015	True
15164	2663	2016	True
4792	2662	2016	True
6847	2656	2018	True
10062	2653	2017	True
15728	2649	2017	True
8185	2647	2016	True
19437	2647	2014	True
6318	2646	2017	True
8096	2641	2016	True
26044	2639	2016	True
27503	2633	2015	True
16124	2626	2014	True
16207	2624	2016	True
7514	2620	2017	True
9770	2618	2017	True
6684	2607	2016	True
28279	2606	2017	True
30758	2605	2017	True
5159	2604	2016	True
5663	2603	2014	True
27284	2590	2017	True
10518	2589	2015	True
8840	2588	2013	True
5001	2585	2016	True
29963	2583	2016	True
26516	2582	2014	True
9547	2577	2017	True
11308	2567	2017	True
15897	2565	2016	True
29889	2562	2015	True
6566	2561	2016	True
25587	2555	2014	True
15510	2555	2015	True
8319	2553	2016	True
21572	2553	2017	True
28605	2552	2017	True
26038	2550	2016	True
8436	2550	2016	True
8560	2541	2015	True
26167	2540	2016	True
3011	2539	2017	True
14434	2536	2017	True
5135	2536	2016	True
29669	2532	2017	True
30339	2520	2018	True
9435	2517	2017	True
28655	2513	2017	True
19231	2512	2016	True
4214	2512	2017	True
8628	2510	2015	True
7062	2504	2018	True
5008	2503	2016	True
1965	2498	2018	True
24121	2495	2014	True
6551	2494	2016	True
7999	2487	2017	True
8482	2481	2015	True
16564	2481	2015	True
7810	2476	2017	True
1329	2473	2018	True
27527	2471	2014	True
24333	2466	2017	True
15370	2465	2017	True
8250	2465	2016	True
15629	2459	2017	True
31126	2452	2015	True
8484	2450	2015	True
15200	2449	2017	True
4142	2449	2017	True
8115	2446	2016	True
26208	2444	2015	True
7802	2443	2017	True
30916	2439	2017	True
8331	2439	2016	True
28473	2437	2016	True
18186	2433	2017	True
25023	2430	2017	True
30070	2429	2015	True
5466	2419	2015	True
8783	2412	2014	True
12717	2411	2017	True
10355	2409	2016	True
2922	2404	2018	True
8243	2403	2015	True
10585	2399	2015	True
4369	2394	2017	True
8180	2392	2016	True
3610	2390	2017	True
8646	2385	2015	True
10267	2385	2016	True
7718	2380	2016	True
9882	2379	2017	True
4569	2374	2017	True
20432	2373	2016	True
5425	2371	2014	True
30351	2369	2018	True
10590	2368	2014	True
14427	2368	2017	True
5278	2367	2016	True
10688	2367	2014	True
32792	2366	2018	True
26553	2362	2014	True
8529	2361	2015	True
29015	2361	2016	True
26571	2361	2014	True
5238	2359	2016	True
10631	2355	2015	True
3599	2355	2017	True
27480	2352	2016	True
10356	2352	2016	True
10622	2349	2015	True
7331	2347	2017	True
4448	2346	2017	True
4989	2346	2016	True
8184	2345	2016	True
8190	2344	2016	True
7680	2343	2016	True
5468	2343	2015	True
4535	2342	2016	True
7080	2340	2017	True
10495	2335	2016	True
6276	2335	2017	True
25753	2335	2015	True
24079	2335	2015	True
8040	2333	2016	True
10027	2332	2016	True
7735	2331	2017	True
29917	2321	2016	True
13976	2320	2017	True
8677	2314	2015	True
16644	2312	2015	True
16161	2309	2016	True
29012	2304	2016	True
16372	2303	2016	True
4590	2303	2017	True
3479	2298	2017	True
25687	2296	2017	True
29360	2294	2017	True
11388	2293	2017	True
18118	2280	2017	True
8833	2279	2014	True
15129	2275	2017	True
6764	2274	2014	True
7798	2273	2017	True
24903	2271	2016	True
5745	2268	2014	True
4251	2267	2017	True
16685	2266	2014	True
7366	2266	2017	True
16471	2265	2015	True
5129	2265	2016	True
4730	2264	2016	True
30956	2263	2016	True
4405	2263	2017	True
31118	2255	2015	True
14015	2251	2017	True
20677	2246	2017	True
15811	2246	2016	True
28371	2245	2017	True
10548	2237	2015	True
13510	2236	2018	True
14403	2236	2016	True
8694	2234	2015	True
8540	2232	2015	True
8450	2232	2016	True
25337	2230	2015	True
5674	2230	2014	True
5642	2225	2014	True
9437	2224	2018	True
26270	2220	2015	True
25463	2219	2016	True
26022	2215	2016	True
5200	2214	2016	True
4119	2213	2017	True
5482	2212	2015	True
8232	2212	2016	True
28318	2210	2017	True
27346	2210	2017	True
28668	2205	2017	True
7826	2196	2017	True
5861	2194	2017	True
30727	2194	2017	True
8530	2193	2015	True
15179	2187	2017	True
20896	2186	2015	True
3254	2186	2017	True
21212	2185	2017	True
5763	2185	2014	True
7925	2181	2017	True
8244	2181	2016	True
5248	2177	2016	True
7795	2176	2017	True
26636	2175	2014	True
18036	2173	2018	True
10063	2172	2017	True
8518	2170	2015	True
15579	2169	2017	True
21738	2168	2016	True
16572	2167	2015	True
15852	2164	2017	True
6605	2161	2016	True
28674	2160	2017	True
19397	2158	2015	True
28516	2156	2015	True
5232	2155	2015	True
11512	2154	2016	True
10285	2151	2016	True
2026	2150	2018	True
2924	2147	2017	True
5090	2146	2016	True
16134	2145	2016	True
22554	2145	2017	True
27054	2144	2017	True
16706	2143	2014	True
5029	2142	2016	True
26603	2141	2014	True
8476	2140	2016	True
8406	2139	2015	True
16520	2139	2014	True
4433	2137	2017	True
6142	2136	2017	True
10731	2134	2013	True
26672	2134	2014	True
5598	2130	2014	True
8279	2126	2016	True
2559	2125	2017	True
1881	2122	2018	True
27499	2122	2015	True
8009	2120	2017	True
6672	2117	2016	True
5021	2114	2016	True
13812	2113	2017	True
7013	2113	2017	True
3373	2111	2017	True
7612	2110	2017	True
9953	2109	2017	True
6606	2108	2016	True
7899	2106	2017	True
5305	2105	2015	True
5304	2104	2015	True
22533	2097	2017	True
8837	2093	2013	True
10511	2091	2015	True
10364	2090	2016	True
5732	2089	2014	True
27472	2081	2016	True
25682	2080	2017	True
11460	2079	2016	True
9800	2077	2017	True
26228	2071	2016	True
18973	2068	2017	True
22699	2067	2017	True
10309	2067	2016	True
38615	2066	2016	True
19132	2065	2016	True
5769	2064	2013	True
7676	2064	2017	True
14022	2059	2017	True
28625	2058	2017	True
12222	2058	2017	True
18141	2057	2017	True
5139	2056	2015	True
5512	2054	2015	True
14190	2054	2017	True
4856	2050	2016	True
8815	2049	2014	True
27393	2048	2017	True
9892	2047	2017	True
19442	2046	2014	True
29932	2044	2016	True
24056	2044	2016	True
15972	2043	2016	True
13027	2042	2017	True
5775	2041	2013	True
25494	2040	2016	True
30836	2039	2017	True
14901	2039	2017	True
8318	2038	2016	True
3847	2038	2017	True
12941	2038	2018	True
3108	2037	2018	True
5714	2034	2014	True
9765	2032	2017	True
26359	2031	2015	True
15980	2031	2016	True
6570	2031	2016	True
9104	2029	2017	True
6350	2029	2016	True
5676	2027	2014	True
15677	2024	2017	True
26045	2024	2016	True
16422	2024	2016	True
29649	2022	2017	True
10209	2020	2016	True
8652	2020	2015	True
16948	2019	2018	True
16998	2018	2018	True
7938	2016	2017	True
4997	2014	2016	True
9486	2014	2017	True
20140	2012	2017	True
17263	2011	2016	True
15558	2008	2016	True
8347	2007	2015	True
6523	2004	2016	True
10945	2001	2018	True
11283	1999	2017	True
11346	1998	2017	True
25247	1998	2017	True
8523	1997	2015	True
28802	1994	2018	True
4827	1992	2015	True
10711	1991	2014	True
30427	1990	2018	True
27816	1989	2018	True
10512	1989	2015	True
14583	1989	2017	True
4187	1988	2016	True
7531	1988	2017	True
10456	1984	2016	True
5394	1984	2015	True
29595	1983	2017	True
10721	1982	2014	True
7816	1980	2017	True
5194	1979	2016	True
6823	1978	2018	True
27241	1977	2017	True
27462	1974	2016	True
26066	1974	2016	True
10643	1973	2015	True
27187	1971	2017	True
31156	1970	2014	True
13764	1967	2018	True
7701	1966	2017	True
5043	1964	2016	True
2536	1962	2018	True
7827	1961	2017	True
26095	1961	2016	True
15460	1960	2017	True
5402	1960	2015	True
1929	1957	2016	True
7582	1951	2017	True
10509	1951	2015	True
12599	1951	2018	True
16249	1949	2016	True
8585	1947	2015	True
30661	1947	2017	True
38701	1943	2017	True
1681	1942	2017	True
7794	1941	2016	True
27709	1941	2017	True
4756	1940	2016	True
4213	1938	2017	True
28511	1936	2015	True
8456	1934	2016	True
10333	1932	2016	True
4403	1929	2017	True
6413	1929	2017	True
16416	1927	2016	True
10241	1925	2016	True
19343	1921	2015	True
9932	1920	2017	True
3402	1918	2018	True
8752	1918	2014	True
27261	1917	2017	True
15019	1915	2017	True
25259	1914	2017	True
4983	1913	2016	True
10484	1911	2016	True
7603	1909	2017	True
11641	1909	2018	True
8444	1907	2015	True
15739	1907	2017	True
5437	1907	2015	True
14169	1907	2017	True
7862	1907	2017	True
2693	1904	2018	True
8572	1902	2015	True
10423	1900	2016	True
8358	1898	2015	True
8566	1898	2015	True
25343	1897	2017	True
8824	1893	2013	True
26246	1891	2015	True
7900	1890	2016	True
3673	1889	2017	True
31109	1889	2015	True
4652	1887	2016	True
29055	1886	2014	True
38766	1883	2016	True
7951	1882	2017	True
13828	1881	2018	True
26238	1878	2015	True
3448	1877	2018	True
5636	1876	2014	True
9054	1875	2018	True
12655	1874	2017	True
3047	1874	2017	True
8820	1872	2014	True
3757	1872	2016	True
17697	1870	2018	True
29397	1869	2018	True
10059	1866	2017	True
10147	1864	2016	True
31148	1863	2014	True
13938	1862	2017	True
25869	1860	2015	True
5759	1860	2014	True
5299	1858	2016	True
7569	1857	2017	True
4895	1857	2016	True
8510	1853	2015	True
8028	1853	2017	True
4671	1852	2017	True
28454	1849	2016	True
7223	1849	2017	True
10197	1848	2016	True
24493	1848	2018	True
38743	1845	2016	True
7542	1843	2017	True
8520	1843	2015	True
8290	1841	2016	True
10419	1838	2015	True
17786	1838	2015	True
16679	1837	2014	True
16359	1835	2016	True
16332	1835	2016	True
8378	1834	2016	True
6694	1834	2015	True
4409	1832	2017	True
29512	1828	2017	True
16292	1828	2016	True
8214	1828	2016	True
7289	1826	2017	True
14663	1824	2017	True
13567	1824	2018	True
9039	1823	2017	True
5333	1820	2015	True
10663	1819	2015	True
3804	1818	2017	True
5588	1818	2015	True
5558	1818	2015	True
8442	1817	2016	True
7913	1817	2017	True
30123	1816	2017	True
8219	1814	2016	True
30133	1814	2016	True
5703	1812	2014	True
8403	1811	2016	True
29996	1811	2016	True
28598	1810	2018	True
4136	1809	2016	True
14326	1809	2017	True
19265	1807	2015	True
27343	1805	2017	True
4565	1805	2017	True
14435	1804	2017	True
27676	1803	2017	True
4442	1802	2017	True
13690	1801	2018	True
26351	1800	2015	True
4018	1799	2017	True
16714	1798	2014	True
6416	1798	2017	True
2648	1798	2018	True
8235	1798	2016	True
31007	1796	2016	True
7404	1796	2017	True
16612	1795	2015	True
6478	1794	2016	True
9406	1792	2018	True
2914	1792	2018	True
28629	1786	2017	True
15824	1785	2017	True
16316	1784	2016	True
28964	1784	2017	True
3895	1783	2017	True
8222	1783	2016	True
7915	1782	2017	True
9546	1781	2017	True
10468	1778	2016	True
7660	1777	2017	True
3482	1777	2017	True
5731	1776	2013	True
24122	1776	2013	True
4231	1775	2017	True
5015	1774	2016	True
8300	1773	2016	True
9975	1773	2017	True
10028	1773	2016	True
10185	1773	2016	True
19402	1772	2014	True
8570	1768	2015	True
5422	1767	2015	True
7527	1763	2017	True
11425	1761	2016	True
13801	1759	2016	True
16310	1754	2016	True
22957	1754	2017	True
28685	1752	2017	True
27198	1750	2017	True
38772	1749	2016	True
24998	1748	2017	True
5535	1747	2015	True
4241	1746	2017	True
8671	1746	2015	True
3731	1744	2017	True
7927	1742	2017	True
5272	1742	2016	True
16386	1741	2016	True
10713	1740	2014	True
5710	1740	2014	True
19424	1739	2014	True
24839	1739	2016	True
5428	1734	2015	True
10669	1732	2015	True
29600	1731	2017	True
21574	1730	2017	True
8063	1730	2016	True
19429	1729	2014	True
10443	1729	2015	True
29455	1727	2018	True
28941	1727	2017	True
17215	1726	2017	True
7051	1724	2018	True
7645	1724	2017	True
15289	1723	2017	True
20417	1723	2016	True
8175	1723	2016	True
5294	1722	2016	True
14925	1722	2017	True
4815	1721	2016	True
30534	1721	2017	True
29574	1720	2017	True
5592	1716	2014	True
15875	1715	2017	True
16155	1712	2016	True
8534	1711	2015	True
16084	1710	2016	True
8334	1710	2016	True
22714	1709	2017	True
26527	1708	2015	True
5652	1707	2014	True
27420	1706	2016	True
7781	1704	2017	True
8073	1703	2016	True
21828	1703	2015	True
1711	1698	2018	True
11043	1697	2018	True
7874	1697	2015	True
11488	1695	2016	True
28984	1692	2016	True
9544	1690	2017	True
5077	1690	2016	True
19459	1689	2014	True
25214	1689	2017	True
10604	1689	2014	True
7860	1688	2017	True
5563	1687	2014	True
14113	1687	2017	True
5542	1687	2015	True
16428	1686	2016	True
4596	1686	2017	True
2994	1686	2017	True
5225	1685	2016	True
10051	1683	2016	True
23144	1682	2016	True
9735	1682	2017	True
5450	1681	2015	True
5016	1681	2016	True
5167	1679	2016	True
3443	1676	2018	True
14186	1676	2017	True
14589	1675	2017	True
3840	1674	2017	True
4264	1674	2017	True
8743	1674	2014	True
20541	1673	2018	True
11130	1672	2017	True
26362	1672	2015	True
6968	1672	2017	True
16338	1672	2016	True
4387	1670	2017	True
25608	1666	2016	True
8168	1666	2016	True
11365	1665	2017	True
26532	1664	2015	True
30983	1663	2016	True
7772	1663	2017	True
28678	1663	2017	True
5229	1661	2016	True
27410	1660	2017	True
4242	1657	2017	True
28222	1656	2016	True
10738	1655	2014	True
14346	1654	2017	True
21651	1653	2017	True
26662	1653	2013	True
25573	1653	2016	True
8182	1652	2016	True
21108	1652	2018	True
8131	1651	2016	True
27103	1650	2017	True
10977	1649	2017	True
7602	1648	2016	True
5327	1647	2016	True
16299	1647	2016	True
30722	1647	2017	True
29614	1646	2016	True
5141	1646	2016	True
6679	1646	2016	True
13530	1643	2017	True
4335	1641	2017	True
28402	1640	2016	True
30800	1638	2017	True
8388	1637	2016	True
10486	1635	2016	True
26659	1635	2014	True
8356	1635	2016	True
11195	1633	2017	True
3876	1632	2017	True
21039	1631	2017	True
14670	1631	2017	True
18791	1631	2015	True
8718	1630	2014	True
9330	1630	2018	True
7429	1630	2017	True
5240	1629	2016	True
3167	1629	2017	True
9270	1629	2018	True
22301	1628	2017	True
26678	1627	2014	True
21003	1627	2018	True
4013	1625	2017	True
30056	1624	2015	True
16132	1624	2016	True
18203	1623	2017	True
6743	1622	2015	True
6831	1622	2018	True
3996	1622	2017	True
16039	1620	2016	True
23230	1619	2014	True
26342	1617	2015	True
15299	1617	2017	True
5580	1616	2014	True
17699	1616	2017	True
11514	1615	2016	True
4388	1614	2017	True
10067	1612	2017	True
29242	1612	2018	True
5750	1610	2014	True
19054	1606	2016	True
27494	1606	2016	True
9649	1605	2017	True
29831	1605	2017	True
6622	1604	2016	True
29247	1603	2018	True
8631	1603	2014	True
8673	1602	2015	True
22877	1600	2017	True
28703	1599	2016	True
5595	1599	2015	True
29893	1598	2016	True
8488	1596	2016	True
8782	1595	2014	True
3630	1594	2017	True
3971	1594	2017	True
5370	1593	2015	True
1981	1592	2018	True
29050	1591	2014	True
10053	1591	2017	True
16539	1589	2015	True
7969	1588	2015	True
16118	1587	2016	True
6578	1587	2016	True
8046	1587	2016	True
10540	1586	2015	True
13579	1585	2016	True
7068	1584	2018	True
24127	1584	2014	True
26506	1584	2015	True
18097	1583	2017	True
17324	1583	2016	True
3993	1582	2017	True
15688	1581	2016	True
25479	1580	2017	True
19431	1578	2014	True
10926	1577	2018	True
28414	1574	2016	True
29063	1574	2014	True
23943	1574	2017	True
38773	1573	2016	True
14470	1572	2017	True
9890	1571	2017	True
31155	1570	2014	True
5617	1570	2014	True
30281	1569	2018	True
2840	1569	2018	True
7953	1567	2016	True
21770	1567	2016	True
7057	1566	2017	True
21514	1566	2017	True
16616	1566	2015	True
10183	1566	2016	True
16666	1561	2015	True
7646	1561	2017	True
10485	1560	2015	True
4170	1559	2017	True
12635	1558	2018	True
21696	1557	2017	True
2710	1557	2017	True
10223	1556	2016	True
8169	1554	2016	True
2027	1554	2018	True
25642	1553	2017	True
6265	1553	2017	True
29647	1550	2017	True
26536	1548	2014	True
4634	1548	2017	True
4775	1548	2016	True
2503	1548	2017	True
26606	1547	2014	True
30186	1547	2015	True
15045	1545	2017	True
18218	1544	2016	True
26642	1544	2014	True
30135	1542	2015	True
16321	1541	2016	True
13290	1541	2017	True
4430	1541	2017	True
31032	1540	2016	True
5980	1540	2017	True
6586	1537	2016	True
14298	1537	2017	True
10736	1534	2014	True
15554	1531	2017	True
31024	1531	2016	True
15407	1529	2017	True
10652	1528	2014	True
7727	1527	2017	True
15717	1527	2017	True
25467	1526	2017	True
28930	1526	2017	True
10735	1526	2014	True
10689	1525	2013	True
16417	1525	2015	True
7947	1523	2017	True
8654	1522	2015	True
8690	1521	2015	True
6720	1520	2015	True
3950	1520	2017	True
16517	1519	2015	True
26297	1518	2015	True
10337	1518	2016	True
10470	1513	2016	True
28235	1512	2017	True
8033	1512	2016	True
8587	1511	2015	True
19309	1509	2016	True
8299	1509	2014	True
26531	1507	2014	True
8386	1507	2016	True
7905	1506	2017	True
3922	1506	2017	True
16213	1506	2016	True
8036	1506	2016	True
5594	1505	2015	True
8143	1505	2016	True
3335	1503	2017	True
5678	1501	2014	True
7348	1501	2017	True
7923	1501	2017	True
5028	1500	2016	True
8317	1499	2016	True
11538	1499	2014	True
7847	1499	2016	True
1312	1498	2017	True
23925	1498	2017	True
25771	1498	2016	True
26424	1498	2015	True
3531	1498	2016	True
10990	1497	2016	True
8081	1495	2016	True
27408	1495	2017	True
15086	1494	2017	True
25318	1494	2017	True
2813	1494	2018	True
9920	1493	2016	True
15478	1492	2017	True
4064	1491	2017	True
30928	1489	2017	True
15888	1488	2016	True
7103	1487	2017	True
9419	1487	2018	True
27369	1486	2017	True
6434	1483	2017	True
21607	1483	2016	True
38672	1482	2017	True
15745	1482	2016	True
4693	1482	2016	True
8158	1480	2016	True
25375	1480	2017	True
5456	1479	2015	True
14153	1477	2017	True
9809	1477	2017	True
8231	1476	2015	True
7231	1475	2017	True
11184	1475	2017	True
5692	1474	2014	True
30336	1474	2018	True
24699	1474	2018	True
20161	1473	2016	True
8245	1472	2016	True
20881	1471	2016	True
7679	1471	2017	True
5408	1471	2015	True
13985	1470	2017	True
4915	1470	2016	True
9952	1470	2016	True
8561	1470	2015	True
16642	1468	2014	True
19984	1468	2016	True
15789	1466	2015	True
21442	1465	2017	True
6295	1465	2017	True
14700	1464	2017	True
8835	1464	2014	True
7842	1463	2017	True
29576	1460	2017	True
27500	1460	2015	True
15050	1459	2017	True
4019	1456	2017	True
28852	1456	2018	True
8564	1454	2015	True
28926	1453	2017	True
38712	1453	2016	True
15056	1453	2017	True
26444	1453	2014	True
9501	1451	2017	True
9879	1450	2017	True
9476	1449	2017	True
7882	1449	2016	True
6441	1448	2017	True
10260	1446	2016	True
9303	1446	2018	True
10469	1446	2016	True
16239	1446	2016	True
4662	1445	2016	True
8460	1443	2016	True
13192	1441	2018	True
4794	1441	2016	True
8632	1441	2015	True
6180	1441	2016	True
10568	1440	2015	True
10372	1439	2016	True
4685	1439	2016	True
5578	1438	2015	True
19317	1438	2016	True
15934	1437	2017	True
28461	1437	2016	True
4763	1437	2015	True
2860	1436	2018	True
29563	1436	2017	True
10479	1435	2016	True
4071	1434	2017	True
10457	1433	2016	True
5204	1433	2016	True
16538	1433	2016	True
12870	1433	2018	True
5280	1432	2016	True
9966	1431	2016	True
25294	1429	2017	True
26804	1429	2017	True
9318	1429	2018	True
3137	1428	2017	True
27048	1427	2018	True
7415	1426	2017	True
29149	1426	2017	True
25811	1425	2016	True
20786	1425	2017	True
4502	1425	2016	True
28720	1424	2015	True
20147	1423	2017	True
7600	1422	2017	True
4588	1422	2017	True
15159	1422	2017	True
15613	1422	2017	True
5350	1421	2015	True
12805	1421	2017	True
25408	1419	2017	True
7513	1419	2017	True
6303	1417	2016	True
26103	1416	2016	True
19942	1416	2017	True
4852	1415	2016	True
4936	1415	2016	True
5508	1414	2015	True
14307	1414	2017	True
25390	1413	2016	True
10544	1413	2015	True
15262	1412	2017	True
23967	1410	2017	True
8072	1408	2016	True
1219	1405	2017	True
10192	1404	2016	True
1933	1404	2018	True
29867	1404	2016	True
15410	1402	2017	True
2938	1401	2017	True
16450	1400	2016	True
27152	1400	2017	True
23856	1400	2016	True
11149	1399	2017	True
9120	1398	2017	True
30052	1398	2014	True
4340	1397	2017	True
3283	1397	2017	True
10566	1397	2015	True
4566	1396	2016	True
8469	1396	2016	True
26172	1395	2016	True
8712	1395	2014	True
15958	1394	2016	True
3278	1394	2018	True
5498	1392	2015	True
22507	1391	2018	True
5891	1390	2017	True
8112	1390	2016	True
26343	1390	2014	True
30054	1388	2015	True
28894	1388	2017	True
7490	1387	2017	True
5510	1386	2014	True
3688	1385	2017	True
3015	1385	2018	True
6264	1384	2016	True
3952	1384	2017	True
6132	1382	2016	True
27229	1381	2017	True
21640	1380	2016	True
14029	1379	2018	True
21827	1379	2016	True
8497	1378	2015	True
8429	1378	2016	True
28924	1378	2017	True
10367	1376	2016	True
22929	1376	2017	True
10538	1376	2015	True
10420	1375	2015	True
2502	1374	2017	True
10700	1374	2014	True
14150	1374	2017	True
6850	1374	2018	True
8686	1373	2015	True
10125	1373	2017	True
8089	1373	2016	True
16665	1373	2015	True
7101	1372	2018	True
7454	1371	2017	True
9851	1371	2017	True
28455	1371	2016	True
24950	1371	2017	True
6383	1371	2017	True
38797	1369	2016	True
17020	1368	2018	True
6728	1368	2015	True
21868	1366	2015	True
16426	1366	2016	True
15732	1364	2017	True
16628	1364	2014	True
16064	1363	2016	True
8684	1363	2015	True
25439	1362	2017	True
10288	1361	2016	True
10278	1361	2016	True
30884	1360	2017	True
21313	1360	2016	True
3025	1360	2017	True
17776	1359	2016	True
24799	1357	2018	True
14089	1357	2017	True
16147	1357	2016	True
4202	1356	2017	True
7892	1356	2017	True
9415	1356	2018	True
10488	1356	2016	True
25134	1353	2017	True
2850	1352	2017	True
26572	1351	2014	True
27350	1349	2017	True
12616	1348	2017	True
8189	1348	2016	True
15990	1348	2016	True
19908	1347	2017	True
4488	1347	2017	True
6685	1346	2016	True
8586	1346	2015	True
26562	1346	2014	True
17787	1345	2015	True
7143	1344	2016	True
18279	1344	2013	True
29933	1343	2016	True
1453	1342	2018	True
3232	1342	2017	True
18107	1340	2017	True
22729	1340	2017	True
26348	1340	2015	True
20865	1339	2016	True
21717	1339	2017	True
8834	1338	2014	True
31122	1338	2015	True
20868	1337	2016	True
8074	1337	2016	True
31086	1337	2016	True
30062	1337	2014	True
7818	1337	2016	True
15836	1336	2016	True
9611	1336	2017	True
4391	1336	2017	True
9779	1336	2017	True
4855	1336	2016	True
24404	1334	2017	True
25954	1333	2016	True
8669	1333	2015	True
6680	1332	2016	True
5492	1331	2015	True
27255	1331	2017	True
26168	1330	2016	True
3562	1330	2017	True
6378	1329	2017	True
24007	1329	2016	True
26549	1329	2014	True
19227	1328	2016	True
16638	1326	2015	True
23013	1326	2017	True
14450	1326	2017	True
15645	1325	2017	True
27159	1325	2017	True
3976	1325	2016	True
9766	1324	2017	True
28340	1323	2017	True
28356	1323	2017	True
23748	1323	2017	True
20471	1322	2017	True
27204	1322	2017	True
15473	1320	2017	True
23156	1319	2016	True
8135	1318	2016	True
28499	1318	2015	True
25246	1318	2017	True
26484	1317	2015	True
9830	1315	2017	True
8554	1315	2015	True
15419	1315	2017	True
23207	1314	2015	True
8748	1313	2014	True
16189	1313	2016	True
28186	1312	2017	True
8776	1311	2014	True
13576	1311	2017	True
19119	1311	2017	True
30067	1311	2014	True
7751	1311	2017	True
17526	1311	2018	True
3350	1309	2018	True
20793	1309	2016	True
19117	1308	2017	True
19273	1306	2016	True
9102	1306	2018	True
7357	1305	2017	True
6990	1305	2017	True
3833	1305	2017	True
10354	1305	2016	True
14782	1305	2017	True
22961	1305	2017	True
8642	1304	2015	True
16326	1304	2016	True
16720	1304	2013	True
5478	1303	2015	True
21833	1303	2016	True
9636	1302	2017	True
8630	1302	2015	True
8337	1302	2016	True
18633	1301	2017	True
3991	1301	2017	True
3977	1300	2017	True
4557	1299	2017	True
29386	1299	2018	True
14801	1299	2017	True
526	1299	2018	True
29993	1296	2015	True
19272	1296	2016	True
21883	1294	2014	True
29010	1293	2016	True
8097	1292	2016	True
18206	1292	2017	True
8838	1292	2013	True
4483	1292	2017	True
15121	1291	2017	True
5323	1291	2016	True
18272	1290	2015	True
15820	1289	2016	True
15866	1289	2017	True
15992	1289	2016	True
16693	1288	2014	True
7619	1288	2016	True
27423	1287	2016	True
22763	1287	2017	True
15250	1286	2017	True
1337	1286	2018	True
7689	1285	2017	True
14318	1284	2017	True
5530	1284	2015	True
15528	1283	2016	True
5753	1283	2014	True
17039	1282	2018	True
26221	1282	2014	True
10291	1280	2016	True
3646	1278	2017	True
6379	1278	2017	True
5734	1277	2014	True
7633	1277	2016	True
8402	1277	2015	True
8013	1277	2016	True
9545	1276	2017	True
25963	1276	2016	True
4276	1275	2017	True
4988	1275	2016	True
15520	1275	2017	True
18236	1275	2016	True
6614	1274	2016	True
27061	1273	2018	True
23915	1272	2017	True
5078	1272	2016	True
13359	1272	2018	True
21811	1271	2016	True
10413	1270	2016	True
27722	1270	2015	True
4987	1270	2016	True
28367	1269	2017	True
17796	1268	2013	True
8032	1268	2017	True
26660	1267	2014	True
4874	1266	2016	True
5689	1265	2014	True
15430	1264	2016	True
28351	1263	2015	True
4629	1263	2017	True
7572	1263	2017	True
16637	1262	2014	True
10702	1262	2014	True
27396	1262	2017	True
23889	1261	2017	True
14806	1261	2016	True
23972	1260	2017	True
4952	1260	2016	True
16518	1259	2016	True
10318	1259	2016	True
4708	1257	2016	True
16492	1257	2016	True
4181	1257	2017	True
5742	1256	2014	True
17076	1256	2017	True
8785	1255	2014	True
12394	1255	2017	True
7221	1252	2017	True
4332	1252	2017	True
7438	1252	2017	True
23728	1252	2017	True
5172	1251	2016	True
31145	1251	2014	True
7721	1251	2017	True
8178	1250	2016	True
18400	1249	2018	True
8125	1248	2016	True
22945	1248	2017	True
30969	1248	2016	True
24001	1248	2016	True
28744	1248	2018	True
15857	1247	2017	True
14791	1247	2017	True
5414	1246	2015	True
8661	1246	2015	True
28950	1246	2017	True
16335	1245	2016	True
7919	1245	2016	True
7009	1245	2017	True
28908	1245	2017	True
5679	1245	2014	True
2218	1244	2018	True
4047	1244	2017	True
21809	1244	2016	True
26643	1243	2014	True
5694	1243	2014	True
7908	1242	2017	True
20757	1241	2017	True
26546	1240	2014	True
30805	1240	2017	True
4478	1240	2017	True
25140	1239	2017	True
14735	1238	2017	True
23781	1238	2017	True
5110	1238	2016	True
5352	1238	2015	True
16690	1237	2014	True
16602	1237	2014	True
30865	1236	2017	True
25543	1236	2017	True
7343	1236	2017	True
15414	1236	2015	True
16677	1236	2014	True
5349	1235	2015	True
24061	1235	2016	True
19271	1235	2016	True
23986	1235	2017	True
29215	1234	2018	True
28374	1234	2017	True
15609	1234	2017	True
29830	1234	2017	True
16435	1234	2016	True
24094	1234	2015	True
10014	1233	2017	True
29518	1233	2016	True
8418	1233	2015	True
38809	1232	2013	True
26239	1232	2015	True
15849	1232	2017	True
5744	1231	2014	True
15074	1231	2016	True
25951	1231	2016	True
7722	1230	2017	True
9126	1229	2018	True
25559	1229	2017	True
5443	1229	2015	True
7671	1229	2017	True
25331	1228	2017	True
4224	1228	2017	True
26140	1228	2016	True
6491	1228	2016	True
26649	1227	2014	True
8439	1227	2016	True
25402	1226	2017	True
13957	1225	2018	True
29613	1224	2017	True
18133	1224	2017	True
13907	1223	2016	True
20668	1223	2017	True
8525	1223	2015	True
15681	1223	2017	True
18214	1222	2016	True
25301	1222	2017	True
26648	1221	2014	True
28657	1221	2017	True
19362	1221	2015	True
24088	1220	2015	True
5026	1219	2016	True
28388	1219	2017	True
24767	1219	2018	True
7510	1219	2017	True
16067	1218	2016	True
30099	1218	2014	True
6569	1218	2016	True
8639	1217	2014	True
15998	1217	2016	True
6320	1216	2017	True
17390	1216	2018	True
10582	1216	2015	True
7398	1216	2017	True
5351	1215	2015	True
9225	1215	2018	True
11092	1215	2017	True
25956	1213	2016	True
5234	1213	2016	True
18251	1213	2016	True
5544	1212	2015	True
19196	1212	2016	True
4609	1211	2016	True
28493	1211	2015	True
5476	1209	2015	True
15721	1208	2017	True
8700	1208	2015	True
8401	1208	2015	True
29058	1207	2014	True
5264	1207	2015	True
22806	1205	2017	True
12915	1204	2017	True
8240	1204	2016	True
19953	1203	2017	True
16275	1203	2016	True
1663	1203	2018	True
5034	1203	2015	True
9959	1203	2016	True
21588	1201	2017	True
5618	1200	2015	True
12925	1199	2018	True
31124	1198	2015	True
29736	1198	2017	True
24841	1197	2016	True
6550	1197	2016	True
16028	1197	2016	True
20910	1196	2015	True
16246	1196	2016	True
22809	1195	2017	True
3089	1195	2016	True
26431	1195	2014	True
6690	1194	2016	True
8064	1193	2016	True
6361	1193	2016	True
16826	1192	2018	True
23701	1192	2017	True
28290	1192	2017	True
7800	1191	2017	True
3589	1191	2017	True
10109	1190	2016	True
26400	1190	2015	True
10230	1190	2016	True
29036	1189	2015	True
21931	1189	2018	True
6252	1189	2017	True
7670	1189	2017	True
24112	1189	2014	True
7621	1188	2017	True
29888	1188	2015	True
20867	1188	2015	True
7547	1187	2017	True
9434	1186	2017	True
4256	1186	2017	True
29526	1186	2017	True
10483	1185	2016	True
14544	1185	2017	True
25549	1185	2017	True
16683	1185	2014	True
5555	1185	2015	True
21878	1184	2014	True
8805	1184	2014	True
27374	1184	2017	True
14380	1184	2017	True
31055	1183	2016	True
5561	1183	2015	True
11429	1182	2016	True
8315	1182	2016	True
19286	1182	2016	True
28520	1182	2014	True
9361	1182	2017	True
26512	1181	2014	True
8723	1181	2014	True
9773	1181	2017	True
16311	1181	2016	True
5316	1181	2016	True
30961	1181	2016	True
8813	1180	2014	True
16138	1180	2016	True
5698	1180	2014	True
4354	1179	2017	True
6670	1179	2016	True
5047	1178	2016	True
30296	1178	2017	True
15112	1177	2016	True
27726	1177	2016	True
26472	1176	2014	True
38619	1176	2017	True
28397	1175	2016	True
1860	1175	2018	True
16507	1174	2015	True
11559	1174	2017	True
7179	1174	2017	True
38792	1174	2016	True
26620	1173	2014	True
15883	1173	2016	True
5366	1172	2014	True
27700	1172	2017	True
4355	1172	2017	True
27138	1172	2018	True
4451	1171	2016	True
5145	1171	2015	True
15525	1170	2016	True
22209	1170	2018	True
8549	1170	2015	True
8069	1170	2016	True
29857	1170	2016	True
6555	1169	2016	True
24111	1169	2014	True
17999	1168	2018	True
7843	1167	2017	True
3168	1167	2017	True
4209	1167	2017	True
7212	1166	2017	True
10214	1166	2016	True
8283	1166	2016	True
8344	1166	2015	True
7788	1166	2016	True
17119	1165	2017	True
26231	1165	2016	True
6294	1165	2017	True
30138	1163	2014	True
4709	1163	2016	True
23203	1163	2015	True
13871	1162	2018	True
13928	1161	2017	True
24556	1161	2017	True
8098	1158	2016	True
5325	1157	2016	True
11187	1157	2017	True
10076	1156	2016	True
19456	1156	2013	True
24991	1156	2017	True
30885	1156	2017	True
30550	1156	2017	True
4963	1155	2016	True
27489	1155	2015	True
16412	1154	2016	True
26097	1154	2016	True
14639	1154	2017	True
5040	1154	2015	True
10134	1153	2017	True
26464	1153	2014	True
6547	1152	2016	True
28049	1152	2018	True
29645	1152	2017	True
5548	1152	2014	True
4538	1151	2017	True
38791	1151	2016	True
9618	1150	2017	True
10452	1149	2014	True
4725	1149	2016	True
4466	1148	2017	True
25905	1148	2016	True
12935	1148	2018	True
14787	1148	2017	True
9904	1147	2017	True
8756	1147	2014	True
28975	1146	2017	True
28377	1146	2016	True
26469	1145	2015	True
15853	1145	2017	True
15294	1145	2016	True
7830	1144	2016	True
8655	1143	2014	True
21774	1143	2016	True
5496	1142	2015	True
4934	1142	2016	True
5631	1142	2014	True
8361	1142	2016	True
13780	1141	2017	True
23191	1141	2016	True
10272	1140	2016	True
25485	1140	2016	True
30031	1140	2015	True
16455	1139	2016	True
10523	1139	2015	True
15974	1138	2016	True
14906	1137	2016	True
3389	1137	2017	True
3120	1137	2018	True
21860	1135	2015	True
31135	1135	2015	True
15053	1135	2017	True
14053	1135	2017	True
18190	1134	2017	True
5291	1134	2016	True
8224	1134	2016	True
14284	1133	2017	True
13726	1133	2018	True
13630	1133	2016	True
5504	1132	2015	True
5547	1132	2015	True
25079	1132	2017	True
8753	1131	2014	True
26433	1131	2015	True
21745	1130	2016	True
25625	1130	2016	True
8773	1130	2014	True
31160	1130	2013	True
10727	1130	2014	True
7902	1130	2016	True
4559	1129	2017	True
7449	1128	2017	True
8581	1126	2015	True
8716	1126	2014	True
8118	1126	2016	True
4284	1125	2017	True
5287	1125	2016	True
14999	1124	2017	True
3909	1124	2017	True
31937	1124	2018	True
25930	1123	2016	True
30244	1123	2018	True
4386	1123	2017	True
7656	1122	2017	True
28522	1122	2015	True
21571	1122	2017	True
28336	1121	2017	True
31936	1121	2018	True
25729	1120	2017	True
24697	1119	2017	True
26944	1118	2017	True
22782	1118	2017	True
28525	1117	2014	True
7529	1117	2017	True
25212	1116	2017	True
15855	1116	2017	True
14562	1116	2017	True
2322	1115	2018	True
9554	1115	2017	True
25250	1115	2017	True
13186	1115	2018	True
4469	1114	2016	True
27447	1114	2016	True
4476	1114	2016	True
9993	1112	2016	True
10093	1112	2017	True
6700	1111	2015	True
8625	1111	2015	True
28420	1111	2016	True
10562	1111	2015	True
2680	1110	2018	True
31048	1110	2016	True
4962	1110	2016	True
5639	1109	2014	True
25054	1109	2017	True
3080	1109	2018	True
13215	1109	2017	True
19683	1109	2018	True
18753	1108	2016	True
12970	1107	2017	True
29585	1107	2017	True
4040	1107	2016	True
30268	1107	2017	True
22395	1106	2018	True
26718	1106	2018	True
8025	1106	2017	True
27917	1106	2018	True
15935	1105	2016	True
7108	1105	2018	True
10279	1104	2016	True
26068	1103	2015	True
30896	1103	2017	True
18515	1103	2018	True
[truncated: 35,564 more rows]
